# Supplementary material for: Recovery of human type 2 diabetes beta cell function associates with transcriptomic signatures that point to novel therapeutic targets
Source: Research Square preprint supplement (doi:10.21203/rs.3.rs-871924/v1), 2021-09-03
Supplement: Supplementary file 2 [file 1c07a6c18e8f341976c15ef6.xlsx]

## Sheet: Table S9A
Table S9A Positively correlated chemical perturbagens identified for "improver" series
PerturbagenId	Perturbagen	GeneTargets	Correlation	NoOfSignatures	pValue	zScore
BRD-K49328571	Dasatinib	ABL1, FYN, LCK, SRC, KIT, YES1, EPHA2, LYN, PDGFRB, BCR, HCK, FGR, FRK, BLK, SRMS	+	662	8.32e-268	34.9428
BRD-K79090631	CGP 60474	CDK1	+	495	2.1e-115	22.8037
BRD-A19500257	13-Hydroxy-8,14,19-trimethoxy-4,10,12,16-tetramethyl-3,20,22-trioxo-2-azabicyclo[16.3.1]docosa-1(21),4,6,10,18-pentaen-9-yl carbamate	HSP90AA1	+	1016	5.18e-101	21.3043
BRD-K49865102	PD-0325901	MAP2K1, MAP2K2	+	639	2.43e-77	18.5777
BRD-A75409952	C23H24O8	PIK3CA, PIK3CG, PLK1	+	785	3.03e-44	13.9032
BRD-K52911425	Pictilisib	PIK3CG, PIK3CD, PIK3R2, PIK3R1, PIK3CA, PIK3CB, PIK3R5, PIK3R3	+	218	4.28e-41	13.3741
BRD-A61304759	SCHEMBL16226502	HSP90AA1	+	174	3.82e-37	12.68
BRD-K08799216	Pelitinib	EGFR	+	150	2.44e-34	12.1633
BRD-U60236422	WH-4-025	NA	+	93	7.95e-33	11.8754
BRD-K13662825	Dinaciclib	CDK1, CDK2, CDK5, CDK9	+	111	3.34e-32	11.7548
BRD-K87909389	Alvocidib	CDK2, CDK4, CDK1, CDK6, CDK7, CDK9, CDK5, CDK8, EGFR, PYGM	+	267	1.05e-31	11.6578
BRD-K60997853	Milciclib (PHA-848125)	CDK1, CDK2, CDK4, NTRK1	+	42	5.04e-31	11.5232
BRD-K19540840	Saracatinib	SRC, ABL1	+	215	6.16e-31	11.5059
BRD-K85606544	Neratinib	EGFR, ERBB2, ERBB4	+	191	3.9e-30	11.3457
BRD-U51024685	noscapine	NA	+	115	2.24e-27	10.7756
BRD-K03449891	Foretinib	KDR, MET, FLT3, KIT, PDGFRB, PDGFRA, TEK, FLT1, FLT4	+	147	6.03e-27	10.6842
BRD-K67868012	PI-103	PIK3CA, PIK3CG, MTOR, PIK3CB, PIK3CD	+	250	8.91e-27	10.648
BRD-K41783120	Apilimod	NA	+	39	1.71e-26	10.5868
BRD-K57080016	Selumetinib	MAP2K1, MAP2K2	+	258	1.89e-26	10.5778
BRD-K05804044	AZ628	BRAF, RAF1	+	192	6.22e-25	10.2452
BRD-K50168500	Canertinib	EGFR, ERBB2, ERBB4	+	172	1.47e-24	10.1619
BRD-K44227013	Ponatinib	ABL1, BCR, FLT3, RET, FGFR1, FGFR2, FGFR3, FGFR4, KIT, TEK	+	107	2.05e-23	9.90156
BRD-K03390685	Cobimetinib	MAP2K1, MAP2K2	+	35	4.74e-22	9.58242
BRD-K41859756	NVP-AUY922	HSP90AA1, HSP90AB1	+	123	6.67e-21	9.30547
BRD-K02708799	GSK 1059615	NA	+	569	6.74e-21	9.30443
BRD-K51575138	TPCA-1	IKBKB	+	173	1.68e-20	9.20677
BRD-K42918627	EX-8678	NA	+	178	4.51e-20	9.10012
BRD-K03618428	CHEMBL1242477	NA	+	71	6.9e-20	9.05378
BRD-K98572433	AZD8931 (Sapitinib)	ERBB2, ERBB3, EGFR	+	13	5.29e-19	8.82877
BRD-K37687095	AZD-8330	MAP2K1, MAP2K2	+	160	6.23e-19	8.81048
BRD-A28467416	PI 3-K/mTOR Inhibitor III, PKI-179	MTOR, PIK3CA	+	38	7.57e-19	8.78867
BRD-K70914287	Falnidamol	EGFR	+	42	2.82e-18	8.63942
BRD-K56343971	Vemurafenib	BRAF	+	186	3.2e-18	8.62499
BRD-K38852836	Ganetespib (STA-9090)	HSP90AA1, HSP90AB1	+	34	3.67e-18	8.60938
BRD-K59317601	MLN-0128	MTOR	+	172	4.42e-18	8.58822
BRD-K82244583	MEK162 (ARRY-162, ARRY-438162)	MAP2K1, MAP2K2	+	33	5.23e-18	8.56885
BRD-A56085258	LGX818	NA	+	33	5.33e-18	8.56652
BRD-K17953061	Staurosporine	CDK2, GSK3B	+	52	7.07e-18	8.53397
BRD-K79259477	NVP-BHG712	NA	+	78	1.18e-17	8.47422
BRD-K23228615	GDC-0980 (RG7422)	MTOR, PIK3CD, PIK3R2, PIK3R1, PIK3CA, PIK3CB, PIK3CG, PIK3R5, PIK3R3	+	39	1.28e-17	8.46481
BRD-K43389698	BMS-387032	CDK2, CDK7, CDK9	+	166	5.9e-17	8.28501
BRD-K64538373	RO4987655	MAP2K1, MAP2K2	+	38	9.6e-17	8.22692
BRD-K65182930	NVP-AUY922	NA	+	102	1.49e-16	8.17449
BRD-K95785537	PP 2	SRC, LCK	+	20	1.71e-16	8.15782
BRD-K05104363	CI-1040	MAP2K1, MAP2K2	+	199	3.45e-16	8.07235
BRD-K84937637	Sirolimus	MTOR, FKBP1A	+	89	7.75e-16	7.97296
BRD-K27305650	LY-294002	MTOR, PIK3CD, PIK3CG, PIK3CA, PIK3CB, PLK1, PRKDC	+	244	1.18e-15	7.92124
BRD-K89014967	Pimasertib	MAP2K1, MAP2K2	+	53	2.85e-15	7.81024
BRD-K68488863	ENMD-2076	AURKA, FLT3, KDR, PDGFRA, SRC, AURKB, FGFR3, KIT, CSF1R	+	56	5.71e-15	7.72234
BRD-K36740062	GSK-1070916	AURKB, AURKC	+	203	8.25e-15	7.67535
BRD-A03506276	XL888	NA	+	42	1.3e-14	7.61713
BRD-K70301465	Ibrutinib (PCI-32765)	BTK	+	26	2.46e-14	7.5341
BRD-K85751432	Refametinib	NA	+	31	3.93e-14	7.47266
BRD-K50140147	TAE-684	ALK	+	202	8.14e-14	7.37625
BRD-K99818283	PIK 90	NA	+	39	8.58e-14	7.36917
BRD-K73293050	WZ 3146	EGFR	+	16	1.09e-13	7.33775
BRD-A58767537	C24H25CLFN5O3	EGFR, ERBB2, ERBB4	+	130	2.19e-13	7.24299
BRD-K51544265	Cabozantinib	KDR, MET	+	115	5.35e-13	7.12123
BRD-A18328003	Apitolisib (gdc-0980, rg7422)	NA	+	108	7.1e-13	7.08199
BRD-K66175015	Afatinib	EGFR, ERBB2, ERBB4	+	40	8.05e-13	7.0646
BRD-K88573743	A-443654	NA	+	126	1.42e-12	6.98572
BRD-K15791587	L-733060	TACR1	+	11	2.15e-12	6.92688
BRD-K20285085	Tamatinib	SYK	+	209	2.89e-12	6.88509
BRD-K56291712	UNII-CVL1685GPH	NA	+	29	5.83e-12	6.78446
BRD-K53417444	OTSSP167	NA	+	101	7.07e-12	6.75643
BRD-K68870568	Flumatinib (mesylate)	ABL1	+	24	2.55e-11	6.56786
BRD-K97365803	PI828	NA	+	18	2.58e-11	6.56647
BRD-A13122391	PG 490	NA	+	88	3e-11	6.54368
BRD-K74381836	SA-1921456	NA	+	15	3.26e-11	6.53151
BRD-K12184916	Dactolisib	MTOR, PIK3CA, PIK3CG, PIK3CD, PIK3R2, PIK3R1, PIK3CB, PIK3R5, PIK3R3	+	224	3.62e-11	6.51568
BRD-K29385665	WH-4-025	NA	+	40	3.67e-11	6.51342
BRD-K87782578	AVL-292	BTK	+	14	5.99e-11	6.4397
BRD-K09078998	Ridaforolimus (Deforolimus, MK-8669)	NA	+	42	1.34e-10	6.31656
BRD-K52850071	WHI-P154	JAK3, EGFR	+	15	1.37e-10	6.31316
BRD-K68174511	TORIN-2	MTOR	+	169	1.84e-10	6.26711
BRD-K57169635	Dacomitinib	EGFR, ERBB2, ERBB3, ERBB4	+	110	2.33e-10	6.23017
BRD-K09549677	Mibefradil	CACNA1G, CACNA1H, CACNA1C, CACNA1I	+	34	2.48e-10	6.2206
BRD-K41895714	AS-605240	PIK3CG	+	209	2.78e-10	6.20266
BRD-K72420232	WZ 4002	EGFR, ERBB2	+	122	3.46e-10	6.16792
BRD-M16762496	PIK-75	PIK3CA	+	15	3.89e-10	6.14955
BRD-K28392481	AZD4547	NA	+	116	4.8e-10	6.11606
BRD-K07762753	Aminopurvalanol	CDK2, CDK1, CDK5	+	35	4.89e-10	6.11302
BRD-K43389675	Daunorubicin	TOP2A	+	36	5.98e-10	6.08076
BRD-A79768653	WY-090217	MTOR, FKBP1A	+	457	6.18e-10	6.07545
BRD-K26667523	TAK-733	MAP2K1, MAP2K2	+	35	7.59e-10	6.04241
BRD-K87947369	Tozasertib	AURKA, AURKB, ABL1, AURKC, BCR, FLT3, JAK2	+	43	8.1e-10	6.03191
BRD-A10330754	AC1MG7IW	NA	+	9	8.38e-10	6.02649
BRD-K41213548	KW-2478	NA	+	31	1.01e-09	5.99624
BRD-K34581968	BMS-536924	IGF1R	+	75	1.04e-09	5.99089
BRD-K49371609	PIK 75	PIK3CA	+	50	1.31e-09	5.95397
BRD-K59227464	LY2228820	MAPK14	+	24	1.97e-09	5.88661
BRD-K81225797	SCH-58261	ADORA2A, ADORA1	+	11	2.35e-09	5.85762
BRD-K99673372	AC1L1U7X	CYSLTR1	+	2	2.38e-09	5.85552
BRD-K17210248	AB01274770-01	TOP2A	+	14	2.56e-09	5.8434
BRD-M64432851	sunitinib	FLT3, KDR, KIT, FLT4, FLT1, PDGFRA, PDGFRB, RET	+	14	2.7e-09	5.83429
BRD-K04548931	Epirubicin	TOP2A	+	27	3.13e-09	5.80972
BRD-K25412176	Afuresertib	AKT2, AKT3, AKT1	+	31	3.69e-09	5.78205
BRD-A68009927	AC1MJ3VH	TOP2A	+	93	4.93e-09	5.73304
BRD-A11702965	CHROMOMYCIN-A3	NA	+	13	5.8e-09	5.70546
BRD-K86930074	Cediranib	KDR, FLT1, FLT4, KIT, PDGFRB, PDGFRA	+	43	9.09e-09	5.6285
BRD-K47598052	PP 1	NA	+	17	9.26e-09	5.62527
BRD-K62965247	Tipifarnib	FNTA, FNTB, CHURC1-FNTB	+	71	1.01e-08	5.61093
BRD-K70578146	Dactinomycin	POLR2A	+	11	1.03e-08	5.60677
BRD-U00779237	WZ-3105	CLK2, CSNK1E, FLT3, ULK1	+	12	1.07e-08	5.60108
BRD-K81311598	BRD-K81311598	NA	+	1	1.2e-08	5.58095
BRD-K44844162	Taselisib	PIK3CD, PIK3R2, PIK3R1, PIK3CA, PIK3CB, PIK3CG, PIK3R5, PIK3R3	+	42	1.29e-08	5.56726
BRD-U51951544	ZG-10	IRAK1	+	16	1.29e-08	5.56714
BRD-K70464547	Sertraline HCl	NA	+	21	1.37e-08	5.5574
BRD-K56032964	AP26113	NA	+	30	1.37e-08	5.55715
BRD-K77625799	Vandetanib	SRC, PTK6, TEK, KDR, FLT1, FLT4, RET, EPHA1, EPHA2, EPHA3, EPHA4, EPHA5, EPHA6, EPHA7, EPHA8, EPHA10, EPHB1, EPHB2, EPHB3, EPHB4, EPHB6, EGFR, ERBB2, ERBB3, ERBB4	+	106	1.42e-08	5.55047
BRD-A76941896	NSC169534	TOP2A	+	14	1.46e-08	5.54597
BRD-K09951645	Dabrafenib	BRAF	+	149	1.75e-08	5.51422
BRD-A18579359	Wiskostatin	WASL	+	13	2.1e-08	5.48191
BRD-K42898655	Temsirolimus (CCI-779, NSC 683864)	NA	+	42	2.14e-08	5.47911
BRD-A73909368	dactinomycin	POLR2A	+	15	2.21e-08	5.47336
BRD-K99964838	Bosutinib	ABL1, SRC, BCR, LYN, CAMK2G, HCK	+	150	2.25e-08	5.47035
BRD-K12343256	Trametinib	MAP2K1, MAP2K2	+	126	2.27e-08	5.46825
BRD-K63068307	ZSTK 474	PIK3CG	+	185	3.26e-08	5.40416
BRD-K54233340	Dorsomorphin	BMPR1A, BMPR1B, PRKAA1	+	67	3.32e-08	5.40088
BRD-K23192422	Lestaurtinib	FLT3, NTRK1, JAK2, NTRK2, NTRK3, RET	+	25	3.54e-08	5.38898
BRD-U44618005	WH-4023	ABL1, SRC	+	11	3.84e-08	5.37449
BRD-K76694128	Rebastinib	ABL1	+	120	4.06e-08	5.36444
BRD-K20441249	BRD-K20441249	NA	+	1	4.55e-08	5.34396
BRD-K22013971	BRD-K22013971	NA	+	1	4.81e-08	5.33376
BRD-K20526256	HG-14-10-04	NA	+	92	5.69e-08	5.30325
BRD-K68588778	MLS000534605	NA	+	14	7.47e-08	5.2533
BRD-K48488978	YM 201636	NA	+	108	8.94e-08	5.22011
BRD-K06543683	Bisindolylmaleimide IX	SIRT1	+	19	9.88e-08	5.20156
BRD-U88459701	atorvastatin	HMGCR, DPP4	+	34	1.19e-07	5.16761
BRD-K93123848	CHIR-265	BRAF, KDR	+	127	1.55e-07	5.11681
BRD-K53414658	Tivozanib	FLT1, FLT4, KDR, KIT, PDGFRA, PDGFRB	+	177	2.12e-07	5.05779
BRD-K69726342	Atorvastatin	HMGCR, DPP4	+	32	2.15e-07	5.05509
BRD-A27376179	CEP-701	NA	+	38	2.32e-07	5.04093
BRD-K38615104	A-443654	AKT1, AKT2	+	54	2.35e-07	5.03854
BRD-U73308409	Vemurafenib	BRAF	+	10	2.78e-07	5.0059
BRD-K23499943	17-DMAG (Alvespimycin) HCl	NA	+	42	2.84e-07	5.00201
BRD-K78484446	BRD-K78484446	NA	+	1	3.12e-07	4.98338
BRD-K95360473	BRD-K95360473	NA	+	1	3.34e-07	4.97034
BRD-K68336408	Tyrphostin AG-1478	EGFR	+	153	3.35e-07	4.9698
BRD-K16730910	Regorafenib	ABL1, RAF1, KIT, FGFR1, MAPK11, FGFR2, FRK, DDR2, BRAF, TEK, PDGFRB, PDGFRA, KDR, FLT1, FLT4, RET	+	95	3.8e-07	4.94519
BRD-K21025364	761437-28-9	NA	+	114	4e-07	4.93537
BRD-K69650333	Idarubicin	TOP2A	+	10	4.03e-07	4.93393
BRD-K86797399	Pracinostat	NA	+	154	4.11e-07	4.93005
BRD-K18787491	U 0126	MAP2K1, MAP2K2	+	24	4.41e-07	4.91647
BRD-K21680192	Mitoxantrone	TOP2A	+	399	4.75e-07	4.90174
BRD-K81814927	MLS003329221	NA	+	11	5.42e-07	4.87571
BRD-A62025033	SCHEMBL6851809	MTOR	+	90	5.64e-07	4.86796
BRD-K51967704	BIIB 021	HSP90AA1	+	59	5.94e-07	4.8576
BRD-K13646352	Midostaurin	FLT3, KIT, PDGFRB, PDGFRA, PRKCZ, PRKCQ, PRKCE, PRKD3, PRKCA, PRKCD, PRKCG, PRKCB, PRKCH, PRKCI, PRKD1, KDR	+	44	6.65e-07	4.83513
BRD-K65426421	BRD-K65426421	NA	+	2	6.88e-07	4.82852
BRD-A52530684	AC1OCDAW	TOP2A	+	66	7.66e-07	4.8069
BRD-K13390322	AT-7519	CDK2, CDK1, CDK9, CDK4, CDK5, CDK6, CDK14, CDK11B, CDK8, CDK7, CDK3, CDK16, CDK17, CDK18, CDK13, CDK10, CDK20, CDK15, CDK19, CDK12	+	226	8.27e-07	4.7916
BRD-K45937204	MLS003129326	NA	+	1	8.81e-07	4.77893
BRD-K69932463	AZD-8055	MTOR	+	220	9.19e-07	4.77046
BRD-A45889380	Quinacrine	TP53	+	96	9.97e-07	4.75409
BRD-K10860596	Granisetron	HTR3A	+	6	1.15e-06	4.7259
BRD-K42728290	Infigratinib	FGFR1, FGFR2, FGFR3, FGFR4	+	137	1.16e-06	4.72343
BRD-K96194081	CEPHARANTHINE	NA	+	21	1.22e-06	4.71302
BRD-K82248240	SA-1925246	NA	+	2	1.31e-06	4.6987
BRD-K65455015	BRD-K65455015	NA	+	2	1.38e-06	4.6883
BRD-K86525559	AZD7762	CHEK1	+	35	1.49e-06	4.6727
BRD-K72238567	2-Fluoroadenosine	RRM1	+	14	1.77e-06	4.63674
BRD-K19181733	BRD-K19181733	NA	+	14	1.87e-06	4.625
BRD-K99750636	BRD-K99750636	NA	+	1	1.88e-06	4.62412
BRD-A18497530	IN1451	MAPK3	+	13	2.5e-06	4.56509
BRD-K63399564	BRD-K63399564	NA	+	9	2.55e-06	4.56079
BRD-K43578482	Defactinib	PTK2, PTK2B	+	30	2.65e-06	4.55282
BRD-K94176593	TWS 119	GSK3B	+	137	2.87e-06	4.53552
BRD-K46056750	SCHEMBL1564574	CHEK1, CHEK2	+	179	3.27e-06	4.50796
BRD-K66850406	BRD-K66850406	NA	+	1	3.36e-06	4.5023
BRD-K39484304	Triptolide	NA	+	9	3.37e-06	4.50189
BRD-K72827473	CEP-37440	NA	+	24	3.47e-06	4.49522
BRD-K85853281	MLS002474519	TOP2A	+	10	3.52e-06	4.49257
BRD-K99946902	Hexylresorcinol	NA	+	3	3.74e-06	4.4794
BRD-K20722021	CEP-32496	BRAF, EGFR, RET	+	26	3.86e-06	4.47301
BRD-A14969012	SKF-83822	NA	+	4	3.96e-06	4.46737
BRD-K77008974	WYE 354	MTOR	+	17	4.29e-06	4.4503
BRD-K22749967	bupivacaine	NA	+	18	4.72e-06	4.42984
BRD-K65857447	BRD-K42723976-001-01-0	NA	+	1	5.17e-06	4.40989
BRD-K64304398	BRD-K64304398	NA	+	9	5.22e-06	4.40775
BRD-K14529030	Meisoindigo	NA	+	36	5.31e-06	4.4043
BRD-K84085265	CG-930	MAPK8	+	25	5.81e-06	4.38447
BRD-K26603252	PD153035 (Hydrochloride)	NA	+	13	6.09e-06	4.37428
BRD-K91859707	BRD-K91859707	NA	+	1	6.18e-06	4.37116
BRD-A68061604	BRN 1549781	NA	+	11	6.4e-06	4.36333
BRD-K23248433	GSK962040	MLNR	+	17	6.63e-06	4.35575
BRD-K44309363	Dexniguldipine	NA	+	26	6.86e-06	4.34829
BRD-K26760349	HG-9-91-01	NA	+	102	6.9e-06	4.34688
BRD-K49294207	SCHEMBL2394914	EGFR	+	14	8.13e-06	4.31095
BRD-A42187224	5-Fluoronorepinephrine	NA	+	1	8.25e-06	4.30764
BRD-K30677119	PP-30	RAF1	+	47	1.02e-05	4.26155
BRD-K32318651	Acyclovir	NA	+	26	1.03e-05	4.25889
BRD-K69705756	CHEMBL2360118	NA	+	5	1.11e-05	4.24245
BRD-K89997465	Chlorpromazine	DRD2, DRD3, DRD4, HTR2A, ADRA2A, ADRA2B, ADRA2C, DRD1, DRD5, HRH1, HTR1A, HTR2C, HTR6, HTR7	+	32	1.19e-05	4.22558
BRD-K45399554	MLS003448149	NA	+	47	1.2e-05	4.22493
BRD-A35869383	PCI-32765	BTK	+	129	1.34e-05	4.19826
BRD-K05686172	BRD-K05686172	NA	+	2	1.39e-05	4.19001
BRD-K75958547	Pitavastatin Calcium	HMGCR	+	38	1.41e-05	4.1868
BRD-K81473043	Tanespimycin	HSP90AA1, HSP90AB1	+	45	1.42e-05	4.18606
BRD-A11678676	NSC627609	PIK3CA, PIK3CG, PLK1	+	22	1.6e-05	4.15875
BRD-K70549064	BIO2_000413	CDK2, GSK3B	+	14	1.69e-05	4.14626
BRD-K00540336	BRD-K00540336	NA	+	9	1.74e-05	4.13892
BRD-K62221994	T 98475	GNRHR	+	13	1.79e-05	4.13353
BRD-K17349619	HLI-373	MDM2	+	43	1.84e-05	4.1273
BRD-K32389477	CHEMBL2356381	NA	+	8	1.94e-05	4.11495
BRD-K51662849	Ilomastat	NA	+	36	1.96e-05	4.11266
BRD-K61250553	Loperamide	OPRM1, OPRD1	+	63	2.01e-05	4.10614
BRD-U70626184	amcinonide	NA	+	81	2.17e-05	4.08907
BRD-K42828737	Sunitinib	CSF1R, KIT, FLT3, PDGFRB, PDGFRA, KDR, FLT1, FLT4, RET	+	85	2.43e-05	4.06189
BRD-K94294671	OSI-027	MTOR	+	57	2.51e-05	4.05469
BRD-K92093830	Doxorubicin	TOP2A	+	92	2.78e-05	4.03076
BRD-K71281111	SNX-2112 (PF-04928473)	NA	+	30	2.97e-05	4.01528
BRD-K82036761	Sertraline	SLC6A4	+	27	2.98e-05	4.01444
BRD-K58442346	Dopamine 3-O-sulfate	DRD2, DRD1, DRD3, DRD4, DRD5	+	2	3.09e-05	4.00602
BRD-K00925050	MLS002729050	NA	+	7	3.16e-05	4.00041
BRD-K42098891	Protriptyline	SLC6A2, SLC6A4	+	33	3.31e-05	3.98958
BRD-K70327167	Suramin	FSHR, P2RY2, RYR1	+	2	3.42e-05	3.98174
BRD-K06816133	BRD-K06816133	NA	+	9	3.62e-05	3.96837
BRD-A22032524	Amlodipine	CACNA1C, CACNA1D, CACNA1S, CACNA2D1, CACNA1F	+	33	3.66e-05	3.96589
BRD-K60093216	BRD-K60093216	NA	+	4	3.73e-05	3.96118
BRD-K83794624	Pirarubicin	TOP2A	+	14	3.75e-05	3.95987
BRD-K50836978	Purvalanola	CDK1, CDK2, CDK4, CDK5	+	15	3.9e-05	3.95054
BRD-K27721098	Clopidogrel	P2RY12	+	11	4.27e-05	3.92899
BRD-K72541103	HSCI1_000191	JAK3	+	8	4.29e-05	3.92737
BRD-K60751982	BRD-K60751982	NA	+	1	4.29e-05	3.92734
BRD-K70490179	Rimcazole	SIGMAR1	+	26	4.44e-05	3.91907
BRD-A69815203	Cyclosporin A	PPIA, PPP3CA	+	45	4.59e-05	3.91137
BRD-K93725829	VX-11E	MAPK1	+	26	4.81e-05	3.90014
BRD-K07660364	BRD-K07660364	NA	+	1	4.86e-05	3.89743
BRD-U43867373	WH-4025	NA	+	13	4.96e-05	3.89276
BRD-K06319591	ZINC3830433	NA	+	1	5.03e-05	3.8891
BRD-K63736853	Acipimox	NA	+	17	5.53e-05	3.86606
BRD-K47000838	Cytochalasin B	NA	+	16	5.66e-05	3.86054
BRD-K66618978	BRD-K66618978	NA	+	1	5.68e-05	3.85972
BRD-K15588452	SCHEMBL5945809	HTR2A	+	11	5.78e-05	3.85528
BRD-K70792160	10-DEBC	PIM1	+	58	5.92e-05	3.84949
BRD-K85985071	Elliptecine	TOP2A, TOP2B	+	28	5.96e-05	3.84786
BRD-K88365400	CHEMBL3348993	NA	+	1	6.38e-05	3.83103
BRD-K46746423	BRD-K46746423	NA	+	1	6.95e-05	3.80978
BRD-K42677417	BRD-K42677417	NA	+	4	7.23e-05	3.80004
BRD-K62839271	BRD-K62839271	NA	+	1	7.28e-05	3.79833
BRD-K04887706	AKT Inhibitor VIII	AKT1, AKT2	+	135	7.28e-05	3.79833
BRD-K29555132	Arachidonamide	CNR1, CNR2	+	9	7.69e-05	3.78484
BRD-K14870255	R428	NA	+	20	8.01e-05	3.77471
BRD-A67616246	paroxetine	NA	+	17	8.02e-05	3.77438
BRD-K29358067	KDM-103	NA	+	4	8.19e-05	3.7692
BRD-K65503129	CCT 018159	HSP90AA1	+	15	8.83e-05	3.75031
BRD-A80793822	Pemoline	NA	+	4	9.8e-05	3.72403
BRD-K32330832	VER 155008	HSPA1A	+	24	9.84e-05	3.72298
BRD-K38454082	BRD-K38454082	NA	+	2	0.000103782	3.70963
BRD-K63675182	Triflupromazine	DRD2, HTR2B	+	35	0.00010485	3.70704
BRD-K87508191	BRD-K87508191	NA	+	1	0.000107913	3.69973
BRD-A10715913	N-[(1-Ethylpyrrolidin-3-yl)methyl]-2-methoxy-5-sulfamoylbenzamide	DRD2, CA7, DRD3	+	12	0.000110804	3.69302
BRD-K97729603	Pimecrolimus	FKBP1A	+	19	0.000112562	3.68901
BRD-K61553312	BRD-K61553312	NA	+	1	0.000114889	3.68381
BRD-K55070890	Cis-N,N-Dimethyl-9-(3-(1-Piperazinyl)Propylidene)Thioxanthene-2-Sulfonamide	HTR2A	+	11	0.000116192	3.68093
BRD-K40115967	BRD-K40115967	NA	+	1	0.000122327	3.66779
BRD-K17896185	Fentanyl Isothiocyanate	OPRD1	+	12	0.000126733	3.65873
BRD-K20079257	Rufinamide	SCN1A, SCN2A, SCN3A, SCN4A, SCN5A, SCN7A, SCN8A, SCN9A, SCN10A, SCN11A	+	9	0.000128108	3.65597
BRD-K29950728	Zuclomiphene	ESR1	+	44	0.000129111	3.65396
BRD-K05524748	Dronedarone HCl	CACNA1D, CACNA1C, CACNA1S, CACNA1F, SCN1A, SCN2A, SCN3A, SCN4A, SCN5A, SCN7A, SCN8A, SCN9A, SCN10A, SCN11A, KCNJ2, HCN4	+	23	0.00013363	3.64513
BRD-K94694331	BRD-K94694331	NA	+	2	0.000136836	3.63903
BRD-K74148702	BSPBIO_001592	PTGS1, PTGS2	+	61	0.000137541	3.6377
BRD-K06499413	CHEMBL2361739	NA	+	7	0.000143048	3.62757
BRD-K09602097	Colforsin	ADCY2	+	47	0.000144675	3.62465
BRD-K51918615	Iodophenpropit	HRH3, HRH4	+	14	0.000146811	3.62086
BRD-K49309964	BRD-K49309964	NA	+	1	0.0001548	3.60713
BRD-K42687792	CHEMBL2359949	NA	+	14	0.000159703	3.59903
BRD-K62578746	N-(4-Chlorophenyl)-4-[hydroxy(diphenyl)methyl]piperidine-1-carbothioamide	NA	+	3	0.000163402	3.59307
BRD-K13154216	Everolimus	FKBP1A	+	42	0.000167921	3.58596
BRD-K64642496	KO143	ABCG2	+	40	0.00017004	3.58268
BRD-K19687926	Lapatinib	EGFR, ERBB2	+	159	0.000174376	3.5761
BRD-K74155249	CHEMBL2135537	NA	+	8	0.000176172	3.57342
BRD-K95976153	BRD-K95976153	NA	+	9	0.000181106	3.56619
BRD-K24686773	CHEMBL1271119	NA	+	7	0.00018325	3.5631
BRD-K04412738	(R,R)-Tramadol	OPRM1, SLC6A2, SLC6A4	+	5	0.000186398	3.55863
BRD-K75832278	SA-84869	NA	+	7	0.000197304	3.54366
BRD-K89626439	Sirolimus	MTOR, FKBP1A	+	16	0.000207736	3.53006
BRD-K69116396	Sertindole	DRD2, HTR2A, HTR2C	+	26	0.000217947	3.51734
BRD-K89162000	Tandutinib	FLT3, KIT, PDGFRA, PDGFRB	+	15	0.000225011	3.50887
BRD-K08317416	CHEMBL2360603	NA	+	13	0.000228591	3.50467
BRD-K25841245	ZINC12496501	HMGCR	+	2	0.000231584	3.5012
BRD-A33711280	Methixene	CHRM5, CHRM1, HTR2C	+	20	0.000232556	3.50008
BRD-K30189597	SYK Inhibitor	SYK	+	12	0.000235662	3.49655
BRD-K76263948	BRD-K76263948	NA	+	1	0.000235902	3.49627
BRD-U37049823	HG-6-64-01	NA	+	15	0.000239797	3.4919
BRD-K04695623	BRD-K04695623	NA	+	9	0.000242195	3.48924
BRD-A50287119	SCHEMBL13586708	MTOR, FKBP1A	+	5	0.000244385	3.48684
BRD-K11927976	UNII-5308DT8060	SYK	+	14	0.000245614	3.48549
BRD-A47598013	Citalopram	SLC6A4	+	17	0.000247312	3.48365
BRD-K43992206	VU0413243-1	NA	+	5	0.000257684	3.47264
BRD-A74904029	5,6-Dichlorobenzimidazole riboside	CSNK2A1	+	13	0.000263735	3.4664
BRD-K25433859	Maprotiline	SLC6A2	+	33	0.000267807	3.46228
BRD-K58435339	AT13387	NA	+	39	0.00026959	3.4605
BRD-K14886982	BRD-K14886982	NA	+	1	0.000273429	3.45669
BRD-K43723251	Chenodeoxycholic Acid	NA	+	16	0.000274151	3.45598
BRD-K02882069	CHEMBL2131671	NA	+	3	0.000283766	3.44667
BRD-K83720053	Avagacestat (BMS-708163)	APH1B, PSEN1, APH1A, NCSTN, PSENEN, PSEN2	+	19	0.00029208	3.43886
BRD-K22134346	Simvastatin	HMGCR	+	60	0.00029281	3.43819
BRD-A43331270	BRD-A43331270-001-01-6	ADRA1A, CACNA1C	+	44	0.000298941	3.43257
BRD-K36529613	PU-H-71	HSP90AA1	+	17	0.000300374	3.43128
BRD-K58772419	AZD-6482	PIK3CB, PIK3CD, PIK3CG, PIK3R2, PIK3R1, PIK3CA, PIK3R5, PIK3R3	+	117	0.000305663	3.42654
BRD-K65283978	MLS003337116	NA	+	5	0.000313768	3.41943
BRD-A39996500	Radicicol	NA	+	274	0.000326223	3.40882
BRD-K40454949	BRD-K40454949	NA	+	1	0.000332791	3.40338
BRD-K81258678	Triptolide (PG490)	NA	+	25	0.000354023	3.38644
BRD-A64933752	2-Phenylaminoadenosine	ADORA2A	+	5	0.000357924	3.38344
BRD-K21283037	Riluzole	SCN5A, SCN1A, SCN2A, SCN3A, SCN4A, SCN7A, SCN8A, SCN9A, SCN10A, SCN11A	+	31	0.000362451	3.37998
BRD-K76840893	RS-17053	ADRA1A	+	15	0.0003669	3.37663
BRD-K07686903	BRD-K07686903	NA	+	1	0.000371173	3.37344
BRD-K49075727	CHEMBL2136735	FLT1, FLT4, KDR, PDGFRA, FGFR1, FGFR3, PDGFRB	+	143	0.000374526	3.37097
BRD-A71262238	Nafadotride	DRD3	+	13	0.000387546	3.36154
BRD-A36151937	NSC5112	CFTR, ESR2	+	8	0.000407227	3.34784
BRD-K87343924	Wortmannin	PIK3CA, PIK3CG, PLK1	+	12	0.000410084	3.3459
BRD-A07875874	Cilnidipine	CACNA1B	+	13	0.000410813	3.3454
BRD-K12906962	BIO2_000029	NA	+	14	0.000425774	3.33547
BRD-A55369275	AC1MR9ZN	GABBR1, GABBR2	+	2	0.00043216	3.33133
BRD-K53987533	10-{3-[4-(2-Chloroethyl)piperazin-1-yl]propyl}-2-(trifluoromethyl)-10H-phenothiazine	DRD2, DRD1	+	12	0.000433544	3.33044
BRD-K62810658	PD-98059	MAP2K1	+	53	0.000438875	3.32704
BRD-K34411947	Streptozosin	NA	+	1	0.000438994	3.32696
BRD-K37991163	Paroxetine	SLC6A4	+	40	0.000443326	3.32422
BRD-K93754473	Tamoxifen	ESR1, ESR2	+	104	0.000444063	3.32376
BRD-K67566344	AZD-2014	MTOR	+	40	0.000457977	3.31515
BRD-A31159102	Fluoxetine	SLC6A4	+	33	0.000464228	3.31135
BRD-K89941546	BRD-K89941546	NA	+	2	0.000468875	3.30857
BRD-K65196043	BRD-K65196043	NA	+	1	0.000483768	3.2998
BRD-K06800040	F1743-0035	NA	+	8	0.000487452	3.29767
BRD-K55204560	CHEMBL2360158	NA	+	1	0.000495301	3.29318
BRD-K83972459	SCHEMBL16980224	AURKA	+	111	0.000509625	3.28516
BRD-K42805893	Osimertinib	EGFR, ERBB2, ERBB3, ERBB4	+	91	0.000517918	3.28061
BRD-K83508485	FK888	TACR1	+	44	0.000520381	3.27927
BRD-K75418563	BRD-K75418563	NA	+	8	0.000524253	3.27718
BRD-K13642330	Apigetrin	NA	+	5	0.000535118	3.27138
BRD-K53669914	BRD-K53669914	NA	+	1	0.000540026	3.2688
BRD-K66818636	Lomifylline	NA	+	5	0.000541233	3.26817
BRD-K43410529	MLN 2480	RAF1, ARAF, BRAF	+	24	0.000552204	3.26248
BRD-K62687522	BRD-K62687522	NA	+	2	0.000561429	3.25778
BRD-K77987635	BRD-K77987635	NA	+	15	0.000561769	3.25761
BRD-A89585551	Mefloquine	NA	+	23	0.000576487	3.25027
BRD-K85275009	175203-39-1	NA	+	11	0.000580829	3.24813
BRD-K62374253	Rufloxacin	NA	+	3	0.000621803	3.22869
BRD-K99113996	AZD2014	NA	+	35	0.000623755	3.22779
BRD-K56277358	MGCD-265	MET, AXL, MST1R, KDR, FLT1, FLT4, TEK	+	109	0.000646963	3.21732
BRD-K41185545	Ambrisentan	EDNRB, EDNRA	+	27	0.000647978	3.21687
BRD-K19352500	Prochlorperazine	DRD2	+	29	0.000654253	3.21411
BRD-K67637637	Olopatadine	HRH1	+	6	0.000657602	3.21264
BRD-K29582182	BRD-K29582182	NA	+	1	0.00066706	3.20854
BRD-K56647759	BRD-K56647759	NA	+	1	0.000670718	3.20696
BRD-K60487568	SU-4312	KDR	+	11	0.000684418	3.20114
BRD-K94441233	Mevastatin	HMGCR	+	19	0.000696138	3.19625
BRD-K94832621	Y-134	ESR1, ESR2	+	11	0.000714729	3.18864
BRD-K77830450	AC1O7M2R	ADCY2	+	21	0.000714968	3.18854
BRD-K43151809	BRD-K43151809	NA	+	1	0.0007193	3.18679

## Sheet: Table S9B
Table S9B Positively correlated chemical perturbagens identified for "non-improver" series
PerturbagenId	Perturbagen	GeneTargets	Correlation	NoOfSignatures	pValue	zScore
BRD-K79090631	CGP 60474	CDK1	+	495	1.55e-273	35.3181
BRD-K87909389	Alvocidib	CDK2, CDK4, CDK1, CDK6, CDK7, CDK9, CDK5, CDK8, EGFR, PYGM	+	267	9.78e-102	21.3822
BRD-K49328571	Dasatinib	ABL1, FYN, LCK, SRC, KIT, YES1, EPHA2, LYN, PDGFRB, BCR, HCK, FGR, FRK, BLK, SRMS	+	662	7.54e-61	16.4145
BRD-K13662825	Dinaciclib	CDK1, CDK2, CDK5, CDK9	+	111	3.6e-60	16.3192
BRD-K27305650	LY-294002	MTOR, PIK3CD, PIK3CG, PIK3CA, PIK3CB, PLK1, PRKDC	+	244	4.4e-55	15.5879
BRD-A75409952	C23H24O8	PIK3CA, PIK3CG, PLK1	+	785	8.62e-52	15.0958
BRD-A79768653	WY-090217	MTOR, FKBP1A	+	457	5.77e-51	14.9699
BRD-K43389698	BMS-387032	CDK2, CDK7, CDK9	+	166	1.64e-47	14.4315
BRD-K81258678	Triptolide (PG490)	NA	+	25	7.22e-44	13.8409
BRD-K52911425	Pictilisib	PIK3CG, PIK3CD, PIK3R2, PIK3R1, PIK3CA, PIK3CB, PIK3R5, PIK3R3	+	218	2.36e-35	12.3526
BRD-K92571446	WZ3105	CLK2, CSNK1E, FLT3, ULK1	+	130	1.9e-33	11.9943
BRD-K59317601	MLN-0128	MTOR	+	172	9.27e-33	11.8624
BRD-K12184916	Dactolisib	MTOR, PIK3CA, PIK3CG, PIK3CD, PIK3R2, PIK3R1, PIK3CB, PIK3R5, PIK3R3	+	224	1.76e-32	11.8089
BRD-A13122391	PG 490	NA	+	88	8.53e-32	11.6752
BRD-K42918627	EX-8678	NA	+	178	2.96e-31	11.569
BRD-K19220233	CHEMBL585951	MAPK8	+	181	5.3e-29	11.115
BRD-A62025033	SCHEMBL6851809	MTOR	+	90	6.61e-27	10.6757
BRD-K49371609	PIK 75	PIK3CA	+	50	1.54e-26	10.5972
BRD-K99818283	PIK 90	NA	+	39	2.26e-25	10.3428
BRD-K67868012	PI-103	PIK3CA, PIK3CG, MTOR, PIK3CB, PIK3CD	+	250	2.78e-25	10.3226
BRD-K13390322	AT-7519	CDK2, CDK1, CDK9, CDK4, CDK5, CDK6, CDK14, CDK11B, CDK8, CDK7, CDK3, CDK16, CDK17, CDK18, CDK13, CDK10, CDK20, CDK15, CDK19, CDK12	+	226	9.06e-25	10.2087
BRD-K63068307	ZSTK 474	PIK3CG	+	185	1.84e-24	10.1396
BRD-A73909368	dactinomycin	POLR2A	+	15	7.87e-24	9.99677
BRD-K43389675	Daunorubicin	TOP2A	+	36	1.08e-23	9.96579
BRD-K34581968	BMS-536924	IGF1R	+	75	3.51e-23	9.84771
BRD-K02708799	GSK 1059615	NA	+	569	2.08e-22	9.6673
BRD-K03618428	CHEMBL1242477	NA	+	71	2.65e-22	9.64212
BRD-A68009927	AC1MJ3VH	TOP2A	+	93	3.11e-22	9.62572
BRD-K53417444	OTSSP167	NA	+	101	4.28e-22	9.593
BRD-K09078998	Ridaforolimus (Deforolimus, MK-8669)	NA	+	42	1.22e-21	9.48442
BRD-K60706752	BRD-K60706752	NA	+	1	2.49e-21	9.40979
BRD-K06543683	Bisindolylmaleimide IX	SIRT1	+	19	5.7e-20	9.07475
BRD-U51951544	ZG-10	IRAK1	+	16	1.12e-19	9.00052
BRD-U00779237	WZ-3105	CLK2, CSNK1E, FLT3, ULK1	+	12	8.81e-19	8.77161
BRD-A52530684	AC1OCDAW	TOP2A	+	66	4.68e-18	8.58148
BRD-K04548931	Epirubicin	TOP2A	+	27	8.92e-18	8.50712
BRD-K00615600	AG 14361	PARP1	+	83	1.12e-17	8.4804
BRD-A56085258	LGX818	NA	+	33	1.63e-17	8.43704
BRD-A18328003	Apitolisib (gdc-0980, rg7422)	NA	+	108	7.79e-17	8.25193
BRD-K02882069	CHEMBL2131671	NA	+	3	1.5e-16	8.17323
BRD-K92093830	Doxorubicin	TOP2A	+	92	2.02e-16	8.13718
BRD-A11702965	CHROMOMYCIN-A3	NA	+	13	1.44e-15	7.89641
BRD-K68174511	TORIN-2	MTOR	+	169	4.38e-15	7.75617
BRD-K17349619	HLI-373	MDM2	+	43	6.76e-15	7.7008
BRD-K99113996	AZD2014	NA	+	35	6.96e-15	7.69703
BRD-K81814927	MLS003329221	NA	+	11	9.57e-15	7.65626
BRD-K30677119	PP-30	RAF1	+	47	1.01e-14	7.64952
BRD-K44844162	Taselisib	PIK3CD, PIK3R2, PIK3R1, PIK3CA, PIK3CB, PIK3CG, PIK3R5, PIK3R3	+	42	1.05e-14	7.64456
BRD-K13154216	Everolimus	FKBP1A	+	42	1.05e-14	7.64453
BRD-K64800655	PHA-793887	CDK1, CDK2, CDK4, CDK5, CDK7, CDK9, CDK14, CDK11B, CDK8, CDK3, CDK6, CDK16, CDK17, CDK18, CDK13, CDK10, CDK20, CDK15, CDK19, CDK12	+	224	1.29e-14	7.61743
BRD-K17953061	Staurosporine	CDK2, GSK3B	+	52	3.7e-14	7.48061
BRD-K71726959	N9-Isopropylolomoucine	CDK1, CDK5	+	56	5.41e-14	7.4305
BRD-K14529030	Meisoindigo	NA	+	36	6.43e-14	7.40765
BRD-A18497530	IN1451	MAPK3	+	13	1.77e-13	7.27231
BRD-K07310275	PF-04691502	MTOR, PIK3CD, PIK3R2, PIK3R1, PIK3CA, PIK3CB, PIK3CG, PIK3R5, PIK3R3	+	39	3.3e-13	7.1874
BRD-K21680192	Mitoxantrone	TOP2A	+	399	5.33e-13	7.12164
BRD-K07762753	Aminopurvalanol	CDK2, CDK1, CDK5	+	35	6.67e-13	7.09073
BRD-K72238567	2-Fluoroadenosine	RRM1	+	14	1.04e-12	7.02968
BRD-A76941896	NSC169534	TOP2A	+	14	1.05e-12	7.02711
BRD-K63458711	BRD-K63458711	NA	+	2	1.54e-12	6.97439
BRD-K70578146	Dactinomycin	POLR2A	+	11	1.93e-12	6.94212
BRD-K83720053	Avagacestat (BMS-708163)	APH1B, PSEN1, APH1A, NCSTN, PSENEN, PSEN2	+	19	2.52e-12	6.90452
BRD-K60997853	Milciclib (PHA-848125)	CDK1, CDK2, CDK4, NTRK1	+	42	2.86e-12	6.88654
BRD-K07426711	BRD-K07426711	NA	+	2	4.1e-12	6.83513
BRD-M16762496	PIK-75	PIK3CA	+	15	4.77e-12	6.81321
BRD-A28467416	PI 3-K/mTOR Inhibitor III, PKI-179	MTOR, PIK3CA	+	38	4.93e-12	6.80857
BRD-K56291712	UNII-CVL1685GPH	NA	+	29	7.98e-12	6.73897
BRD-K23228615	GDC-0980 (RG7422)	MTOR, PIK3CD, PIK3R2, PIK3R1, PIK3CA, PIK3CB, PIK3CG, PIK3R5, PIK3R3	+	39	9.77e-12	6.70943
BRD-K48306626	BRD-K48306626	NA	+	1	1.29e-11	6.66884
BRD-K17210248	AB01274770-01	TOP2A	+	14	1.48e-11	6.649
BRD-K15014948	Tranexamic acid	PLG	+	1	2.75e-11	6.5568
BRD-K05804044	AZ628	BRAF, RAF1	+	192	4.41e-11	6.48579
BRD-A45498368	WYE 125132	MTOR	+	201	5.36e-11	6.45641
BRD-K77909743	BRD-K77909743	NA	+	2	6.38e-11	6.43008
BRD-K69932463	AZD-8055	MTOR	+	220	6.62e-11	6.42439
BRD-K49373277	BRD-K49373277	NA	+	1	8.54e-11	6.38547
BRD-K29107232	Broad-Sai-595	NA	+	29	1.52e-10	6.2971
BRD-K72561299	Meractinomycin	NA	+	2	2.04e-10	6.25103
BRD-A17016119	Rhizocarpic-acid	NA	+	6	2.72e-10	6.2058
BRD-K86059888	BRD-K86059888	NA	+	1	2.87e-10	6.19768
BRD-K70504303	NCGC00179649-07	NA	+	1	3.54e-10	6.16413
BRD-K37312348	Kenpaullone	GSK3B, CDK1, CDK5	+	33	4.12e-10	6.14033
BRD-K23192422	Lestaurtinib	FLT3, NTRK1, JAK2, NTRK2, NTRK3, RET	+	25	4.21e-10	6.13696
BRD-K18787491	U 0126	MAP2K1, MAP2K2	+	24	4.71e-10	6.11879
BRD-K85985071	Elliptecine	TOP2A, TOP2B	+	28	4.77e-10	6.11703
BRD-K09051149	BRD-K09051149	NA	+	1	7.47e-10	6.04507
BRD-K54343811	BRD-K54343811	NA	+	32	9.26e-10	6.01036
BRD-K72324716	BRD-K72324716	NA	+	1	9.83e-10	6.00057
BRD-K15834839	Lobendazole	NA	+	8	1.23e-09	5.96415
BRD-K67566344	AZD-2014	MTOR	+	40	1.36e-09	5.94718
BRD-K64622987	Torcetrapib	NA	+	18	1.52e-09	5.92988
BRD-K36250651	BRD-K36250651	NA	+	1	1.63e-09	5.91805
BRD-K20441249	BRD-K20441249	NA	+	1	1.84e-09	5.89811
BRD-K72414522	AZD-5438	CDK14, CDK1, CDK4, CDK11B, CDK2, CDK8, CDK7, CDK9, CDK3, CDK6, CDK5, CDK16, CDK17, CDK18, CDK13, CDK10, CDK20, CDK15, CDK19, CDK12	+	210	1.98e-09	5.88607
BRD-K01896723	MLS003128614	NA	+	10	2.09e-09	5.8768
BRD-K74162965	BRD-K74162965	NA	+	2	2.36e-09	5.85687
BRD-A06352508	SB-218078	CHEK1	+	23	2.54e-09	5.8447
BRD-K30478013	BRD-K30478013	NA	+	1	2.56e-09	5.84309
BRD-K08589866	CHEMBL3186197	IGF1R, INSR	+	32	2.63e-09	5.8389
BRD-K96329791	BRD-K96329791	NA	+	2	2.7e-09	5.83446
BRD-K65283978	MLS003337116	NA	+	5	2.9e-09	5.82225
BRD-K51018020	Arylmorpholine analog 37	PRKDC	+	14	3.03e-09	5.81524
BRD-K69650333	Idarubicin	TOP2A	+	10	3.03e-09	5.81523
BRD-K55288106	BRD-K55288106	NA	+	1	3.03e-09	5.81502
BRD-K42898655	Temsirolimus (CCI-779, NSC 683864)	NA	+	42	3.47e-09	5.79254
BRD-K39827602	BRD-K39827602	NA	+	1	3.83e-09	5.77573
BRD-K11636097	JNJ-7706621	CDK1, CDK2, AURKA, AURKB	+	14	5.22e-09	5.72338
BRD-K77008974	WYE 354	MTOR	+	17	5.31e-09	5.72065
BRD-K88573743	A-443654	NA	+	126	5.94e-09	5.70131
BRD-K71480163	GDC-0068	NA	+	30	6.25e-09	5.69276
BRD-K88114920	BRD-K88114920	NA	+	3	7.18e-09	5.66903
BRD-K71799778	BML-259	CDK2, CDK5	+	45	8.1e-09	5.64827
BRD-K87338781	CYM50174	NA	+	3	1.01e-08	5.61012
BRD-K11927976	UNII-5308DT8060	SYK	+	14	1.13e-08	5.59034
BRD-K96263742	GW7647	PPARA	+	16	1.38e-08	5.55618
BRD-K12025316	BRD-K12025316	NA	+	1	1.43e-08	5.55018
BRD-K38615104	A-443654	AKT1, AKT2	+	54	1.44e-08	5.54812
BRD-K01979737	BRD-K01979737	NA	+	1	1.58e-08	5.53215
BRD-K51126488	BRD-K51126488	NA	+	1	1.74e-08	5.51528
BRD-K72541103	HSCI1_000191	JAK3	+	8	1.79e-08	5.51043
BRD-K74556269	BRD-K74556269	NA	+	1	1.84e-08	5.50598
BRD-K49865102	PD-0325901	MAP2K1, MAP2K2	+	639	1.89e-08	5.50041
BRD-K85853281	MLS002474519	TOP2A	+	10	1.99e-08	5.49191
BRD-K65503129	CCT 018159	HSP90AA1	+	15	2.01e-08	5.48982
BRD-K21025364	761437-28-9	NA	+	114	2.02e-08	5.48924
BRD-A36630025	4,11-Diethyl-4,9-dihydroxy-1H-pyrano[3',4':6,7]indolizino[1,2-b]quinoline-3,14(4H,12H)-dione	TOP1	+	80	2.27e-08	5.46842
BRD-K20192397	BRD-K20192397	NA	+	1	2.59e-08	5.4453
BRD-K80193146	BRD-K80193146	NA	+	1	3.58e-08	5.38729
BRD-K46385262	BRD-K46385262	NA	+	2	5.89e-08	5.29699
BRD-K56844688	Epirubicin HCl	NA	+	41	6.55e-08	5.27757
BRD-K64979177	BRD-K64979177	NA	+	1	7.37e-08	5.25586
BRD-K31491153	Phenyl Biguanide	NA	+	5	7.84e-08	5.24444
BRD-K09301754	BRD-K09301754	NA	+	1	8.51e-08	5.22917
BRD-K13261168	Quinelorane	DRD2, DRD3	+	8	8.7e-08	5.22524
BRD-K23050218	BRD-K23050218	NA	+	3	8.97e-08	5.21951
BRD-K22936972	Diphenylpyraline	HRH1, SLC6A3	+	26	9.02e-08	5.21852
BRD-K79326278	BRD-K79326278	NA	+	1	9.51e-08	5.20872
BRD-K83694683	CHEMBL2143628	NA	+	41	9.88e-08	5.2015
BRD-K65608865	BRD-K65608865	NA	+	2	9.97e-08	5.19996
BRD-K33881003	BRD-K33881003	NA	+	1	1e-07	5.19922
BRD-K39944607	3R14S-Ochratoxin a	NA	+	15	1.03e-07	5.19414
BRD-K86797399	Pracinostat	NA	+	154	1.05e-07	5.19114
BRD-A42383464	Actinomycin-D	NA	+	3	1.05e-07	5.19102
BRD-K86118762	OSI-906 (Linsitinib)	IGF1R, INSR	+	26	1.08e-07	5.18495
CMAP-CRCGN-CB7993113	CB7993113	NA	+	1	1.16e-07	5.17143
BRD-K05671267	BRD-K05671267	NA	+	2	1.59e-07	5.11188
BRD-K83794624	Pirarubicin	TOP2A	+	14	1.64e-07	5.10664
BRD-K94294671	OSI-027	MTOR	+	57	2.15e-07	5.05561
BRD-K11847435	BRD-K11847435	NA	+	2	2.2e-07	5.05072
BRD-K62342148	BRD-K62342148	NA	+	1	2.44e-07	5.03062
BRD-K51237366	SA-1938867	NA	+	3	2.49e-07	5.02681
BRD-K78948132	BRD-K78948132	NA	+	1	2.58e-07	5.0206
BRD-K74148702	BSPBIO_001592	PTGS1, PTGS2	+	61	2.64e-07	5.01591
BRD-K37764012	PF-03758309	PAK4	+	146	2.68e-07	5.01326
BRD-K37225211	BRD-K37225211	NA	+	1	3.22e-07	4.97753
BRD-K09951645	Dabrafenib	BRAF	+	149	3.87e-07	4.94159
BRD-K27757818	BRD-K27757818	NA	+	1	4.26e-07	4.92302
BRD-K22458275	BRD-K22458275	NA	+	1	4.67e-07	4.90514
BRD-K53780220	MLS003128610	NA	+	8	4.77e-07	4.90074
BRD-K37890730	Camptothecin	TOP1	+	87	5.52e-07	4.87206
BRD-K20761826	BRD-K20761826	NA	+	1	5.73e-07	4.86481
BRD-K21576808	BRD-K21576808	NA	+	1	6.82e-07	4.83012
BRD-K44021875	BRD-K44021875	NA	+	1	7.16e-07	4.82064
BRD-K94222931	BRD-K94222931	NA	+	1	7.34e-07	4.81564
BRD-K97365803	PI828	NA	+	18	7.43e-07	4.81314
BRD-K00480552	MLS003129266	NA	+	1	8.6e-07	4.78372
BRD-K60151092	BRD-K60151092	NA	+	2	9.27e-07	4.76867
BRD-A71390734	AC1Q6JJ5	TOP2A	+	79	9.67e-07	4.76015
BRD-K74709515	BRD-K74709515	NA	+	1	1.02e-06	4.75036
BRD-A32988684	Heptaminol	NA	+	1	1.04e-06	4.74507
BRD-K22945779	BRD-K22945779	NA	+	2	1.43e-06	4.68078
BRD-A84045418	IN1549	NA	+	51	1.9e-06	4.62212
BRD-K29253960	BRD-K29253960	NA	+	1	1.92e-06	4.61983
BRD-K83670234	MLS003329222	NA	+	13	2.16e-06	4.595
BRD-K43057855	BRD-K43057855	NA	+	1	2.27e-06	4.5851
BRD-K70880645	BRD-K70880645	NA	+	5	2.41e-06	4.57282
BRD-K88081783	SA-1922975	NA	+	4	2.44e-06	4.56967
BRD-K85332209	BRD-K85332209	NA	+	1	2.48e-06	4.56688
BRD-K12787259	CX-5461	NA	+	117	2.65e-06	4.55261
BRD-K37060179	BRD-K37060179	NA	+	3	2.85e-06	4.537
BRD-K40906026	BRD-K40906026	NA	+	1	3.01e-06	4.52572
BRD-K60004464	BRD-K60004464	NA	+	1	3.1e-06	4.51922
BRD-K73290601	BRD-K73290601	NA	+	1	3.2e-06	4.513
BRD-K98572433	AZD8931 (Sapitinib)	ERBB2, ERBB3, EGFR	+	13	3.4e-06	4.50013
BRD-K95142244	BMN 673	NA	+	24	3.41e-06	4.49944
BRD-K50171542	BRD-K50171542	NA	+	2	3.65e-06	4.48489
BRD-A56518012	MLS002702107	TOP2A	+	4	3.7e-06	4.48212
BRD-K20824632	BRD-K20824632	NA	+	2	3.97e-06	4.46687
BRD-K95785537	PP 2	SRC, LCK	+	20	4.34e-06	4.44753
BRD-U73308409	Vemurafenib	BRAF	+	10	4.6e-06	4.43494
BRD-A10012892	Argatroban	NA	+	13	4.87e-06	4.42282
BRD-K65514600	BRD-K65514600	NA	+	3	5.31e-06	4.40416
BRD-K67831364	ZM323881	KDR	+	11	6.16e-06	4.37188
BRD-K87520488	BRD-K87520488	NA	+	1	6.63e-06	4.35581
BRD-K01573538	BRD-K01573538	NA	+	2	6.77e-06	4.35105
BRD-K56343971	Vemurafenib	BRAF	+	186	7.16e-06	4.33896
BRD-K52225919	BRD-K52225919	NA	+	6	7.36e-06	4.33295
BRD-K65857447	BRD-K42723976-001-01-0	NA	+	1	7.55e-06	4.32712
BRD-K79242575	SA-85148	NA	+	2	7.75e-06	4.32146
BRD-A25736793	BRD-A25736793	NA	+	129	8.02e-06	4.31393
BRD-K36680103	Omecamtiv mecarbil (CK-1827452)	MYH7, MYH6, MYH7B, MYL3, MYL2, MYL7, MYL4	+	9	8.06e-06	4.31283
BRD-K70549064	BIO2_000413	CDK2, GSK3B	+	14	8.21e-06	4.30876
BRD-K97364711	BRD-K97364711	NA	+	2	8.52e-06	4.30062
BRD-K80184735	KUC104240N	NA	+	2	8.6e-06	4.29839
BRD-K77681376	MLS003128609	NA	+	9	8.92e-06	4.29042
BRD-K18922609	Neostigmine	ACHE	+	21	9.46e-06	4.27732
BRD-K53601225	BRD-K53601225	NA	+	2	9.63e-06	4.27339
BRD-K93658967	Aloisine A	CDK2	+	12	9.84e-06	4.26842
BRD-K57179401	BRD-K57179401	NA	+	1	9.92e-06	4.26668
BRD-K93623754	3,6-Diphenyl-1,2,4-triazin-5-yl methyl ether	NA	+	6	1.06e-05	4.25288
BRD-K60993486	BRD-K60993486	NA	+	2	1.06e-05	4.25183
BRD-K67780021	BRD-K67780021	NA	+	1	1.06e-05	4.2515
BRD-K66175015	Afatinib	EGFR, ERBB2, ERBB4	+	40	1.09e-05	4.24605
BRD-K62562723	SR-2640	NA	+	22	1.09e-05	4.24592
BRD-M70861773	BRD-M70861773	NA	+	1	1.13e-05	4.23719
BRD-K54789622	BRD-K54789622	NA	+	2	1.14e-05	4.23529
BRD-K23204545	Busulfan	NA	+	19	1.23e-05	4.21874
BRD-K80852934	BRD-K80852934	NA	+	2	1.31e-05	4.20343
BRD-K87112191	PP-242	NA	+	5	1.35e-05	4.19808
BRD-K62199122	BRD-K62199122	NA	+	1	1.48e-05	4.17717
BRD-K18814832	MLS000581978	NA	+	3	1.49e-05	4.1749
BRD-K16425314	BRD-K16425314	NA	+	1	1.5e-05	4.17404
BRD-K88306141	BRD-K88306141	NA	+	2	1.52e-05	4.17092
BRD-K22983069	BRD-K22983069	NA	+	1	1.57e-05	4.16309
BRD-K77286328	Reversine	AURKB	+	16	1.61e-05	4.15767
BRD-K53046450	BRD-K53046450	NA	+	1	1.62e-05	4.1558
BRD-K29458283	Chlorambucil	NA	+	34	1.71e-05	4.14406
BRD-K41350512	BRD-K41350512	NA	+	2	1.9e-05	4.11956
BRD-K92158425	MLS003128613	NA	+	9	1.9e-05	4.11898
BRD-K95360473	BRD-K95360473	NA	+	1	1.96e-05	4.11243
BRD-K57836103	BRD-K57836103	NA	+	6	1.97e-05	4.11126
BRD-K79222491	MLS003128612	NA	+	11	2.01e-05	4.10583
BRD-K41494493	Bisphenol A	PPARG	+	1	2.14e-05	4.09183
BRD-K45986013	MLS005000117	NA	+	1	2.15e-05	4.09116
BRD-K62810658	PD-98059	MAP2K1	+	53	2.15e-05	4.0903
BRD-K30351863	CHEMBL1706858	APEX1	+	12	2.16e-05	4.08961
BRD-K26694002	BRD-K26694002	NA	+	1	2.22e-05	4.08315
BRD-A22844106	Tenoxicam	PTGS2, PTGS1	+	7	2.29e-05	4.07587
BRD-A25569250	KI-16425	LPAR1, LPAR3	+	8	2.43e-05	4.0623
BRD-K26785978	BRD-K26785978	NA	+	2	2.52e-05	4.05351
BRD-K47598052	PP 1	NA	+	17	2.53e-05	4.05306
BRD-K39032190	BRD-K39032190	NA	+	2	2.55e-05	4.05054
BRD-K59453031	MLS003129107	NA	+	2	2.62e-05	4.04481
BRD-K32330832	VER 155008	HSPA1A	+	24	2.81e-05	4.02847
BRD-K59227464	LY2228820	MAPK14	+	24	2.83e-05	4.02676
BRD-K57080016	Selumetinib	MAP2K1, MAP2K2	+	258	2.9e-05	4.02084
BRD-K65735929	BRD-K65735929	NA	+	2	2.97e-05	4.01553
BRD-A70150975	Hydroxyl	NA	+	29	3e-05	4.01282
BRD-K26857129	BRD-K26857129	NA	+	1	3.06e-05	4.00794
BRD-A01787639	Naftopidil	NA	+	17	3.17e-05	3.99983
BRD-K26304855	MLS003329219	NA	+	12	3.54e-05	3.97331
BRD-K23980805	SMR000024485	NA	+	8	3.56e-05	3.97234
BRD-A37817666	PRESTWICK3_000652	GABRA1, GABRR1, GLRA2, GLRA3	+	8	3.58e-05	3.97087
BRD-K53414658	Tivozanib	FLT1, FLT4, KDR, KIT, PDGFRA, PDGFRB	+	177	3.59e-05	3.97055
BRD-K13642330	Apigetrin	NA	+	5	3.59e-05	3.97017
BRD-K39484304	Triptolide	NA	+	9	3.67e-05	3.96522
BRD-K07686903	BRD-K07686903	NA	+	1	3.97e-05	3.94608
BRD-K08799216	Pelitinib	EGFR	+	150	4.07e-05	3.94053
BRD-K47612243	CHEMBL2361643	NA	+	1	4.35e-05	3.92398
BRD-A30437061	(+)-Camptothecin	TOP1	+	15	4.39e-05	3.92227
BRD-A17462676	Bambuterol	ADRB2	+	15	4.58e-05	3.91187
BRD-K08731287	BRD-K08731287	NA	+	1	4.81e-05	3.90017
BRD-K70399291	BRD-K70399291	NA	+	5	4.84e-05	3.89865
BRD-K05104363	CI-1040	MAP2K1, MAP2K2	+	199	4.95e-05	3.89315
BRD-A27376179	CEP-701	NA	+	38	5.12e-05	3.88461
BRD-K75264577	BRD-K75264577	NA	+	5	5.21e-05	3.8806
BRD-K73044744	KUC104495	NA	+	7	5.23e-05	3.8799
BRD-K48199208	N-(4-(4-Hydroxypiperidin-1-yl)but-2-ynyl)-n-methylacetamide	NA	+	5	5.23e-05	3.87976
BRD-K73898073	BRD-K73898073	NA	+	2	5.53e-05	3.86621
BRD-K85976669	BRD-K85976669	NA	+	1	5.8e-05	3.85423
BRD-K44119437	BRD-K44119437	NA	+	1	5.85e-05	3.85238
BRD-K34820100	Tebuthiuron	NA	+	10	5.86e-05	3.85195
BRD-K96362535	Dihydro-Beta-Tubaic acid	NA	+	5	5.87e-05	3.85147
BRD-K56301236	BRD-K56301236	NA	+	2	6.23e-05	3.83684
BRD-K74305285	SA-96816	NA	+	6	6.26e-05	3.83581
BRD-K18823018	BRD-K18823018	NA	+	1	6.36e-05	3.83198
BRD-K28862107	BRD-K28862107	NA	+	1	6.42e-05	3.8295
BRD-K29395450	PIK-93	NA	+	85	6.44e-05	3.82862
BRD-K42107428	MLS003649957	NA	+	2	6.49e-05	3.82692
BRD-K13646352	Midostaurin	FLT3, KIT, PDGFRB, PDGFRA, PRKCZ, PRKCQ, PRKCE, PRKD3, PRKCA, PRKCD, PRKCG, PRKCB, PRKCH, PRKCI, PRKD1, KDR	+	44	6.85e-05	3.81342
BRD-K19204484	BRD-K19204484	NA	+	2	6.88e-05	3.8125
BRD-K43797669	Genistein	CFTR, ESR2	+	119	7.06e-05	3.80601
BRD-K61779668	BRD-K61779668	NA	+	6	7.08e-05	3.80539
BRD-A11678676	NSC627609	PIK3CA, PIK3CG, PLK1	+	22	7.19e-05	3.80154
BRD-K26760349	HG-9-91-01	NA	+	102	7.25e-05	3.79962
BRD-K68749296	BRD-K68749296	NA	+	5	7.47e-05	3.79223
BRD-K63126190	Epinephrine HCl	ADRB2, ADRB1, ADRB3, ADRA2B, ADRA1D, ADRA1A, ADRA1B, ADRA2A, ADRA2C	+	16	7.52e-05	3.7904
BRD-K22816026	SA-1459167	NA	+	8	7.56e-05	3.78905
BRD-K36796217	BRD-K36796217	NA	+	6	7.64e-05	3.78648
BRD-A12832192	Streptozotocin	NA	+	2	7.74e-05	3.78339
BRD-K78883024	MLS002703110	NPSR1	+	6	7.93e-05	3.77721
BRD-K06895174	Cisaprida	HTR4, KCNH2	+	7	8.07e-05	3.77275
BRD-K84389640	AC1LOPLX	NA	+	5	8.25e-05	3.76747
BRD-K56446541	MLS002471791	NA	+	4	8.32e-05	3.76533
BRD-A26711594	Nicardipine	CACNA1C, CACNA1D, CACNA1S, CACNA1F	+	45	8.39e-05	3.76299
BRD-K85102293	BRD-K85102293	NA	+	8	8.61e-05	3.75671
BRD-K64538373	RO4987655	MAP2K1, MAP2K2	+	38	8.66e-05	3.75533
BRD-K46419649	U0126	NA	+	15	8.72e-05	3.75339
BRD-K43683841	BRD-K43683841	NA	+	4	8.88e-05	3.74897
BRD-K08317416	CHEMBL2360603	NA	+	13	8.99e-05	3.74577
BRD-K10846167	MLS003128611	NA	+	8	9e-05	3.74559
BRD-K53980138	BRD-K53980138	NA	+	2	9.08e-05	3.74324
BRD-K83064458	Etofylline	ADORA1	+	2	9.08e-05	3.74323
BRD-K17743125	Belinostat	HDAC1, HDAC2, HDAC3, HDAC4, HDAC5, HDAC6, HDAC7, HDAC8, HDAC9, HDAC10, HDAC11	+	175	9.11e-05	3.74257
BRD-K36627727	Tamibarotene	RARA, RARB	+	50	9.15e-05	3.74151
BRD-K60907894	Adiphenine	CHRNA1	+	3	9.25e-05	3.73856
BRD-K10808435	CHEMBL2361633	NA	+	1	9.27e-05	3.73805
BRD-K96390176	CID 57118766	VDR	+	2	0.000100436	3.71792
BRD-K19865807	BRD-K19865807	NA	+	2	0.000105453	3.70558
BRD-A93426597	CHEMBL241271	NA	+	4	0.000105611	3.7052
BRD-K67075780	TGX-115	NA	+	40	0.000105634	3.70515
BRD-K35789946	BRD-K35789946	NA	+	1	0.000111492	3.69144
BRD-K94012289	936890-98-1	NA	+	127	0.000113894	3.68602
BRD-K52149447	BRD-K52149447	NA	+	2	0.00011439	3.68491
BRD-K77235585	CHEMBL3184084	NA	+	2	0.000117006	3.67915
BRD-K72951360	Valrubicin	TOP2A	+	28	0.000118136	3.6767
BRD-K53674232	BRD-K53674232	NA	+	1	0.000125037	3.66218
BRD-K45028867	MLS003129422	NA	+	1	0.000125451	3.66134
BRD-A35588707	Teniposide	TOP2A	+	95	0.000127269	3.65765
BRD-K38965110	CHEMBL2358936	NA	+	1	0.000128424	3.65533
BRD-A62525898	AC1NWAPU	NR3C1	+	34	0.00013316	3.64603
BRD-K06666320	MLS000057540	NA	+	11	0.000136416	3.63982
BRD-K60554389	BRD-K60554389	NA	+	2	0.000140734	3.63178
BRD-K98025142	MLS000715887	NA	+	2	0.000141189	3.63095
BRD-A78909648	PK04_130213	NA	+	6	0.000141956	3.62955
BRD-K94176593	TWS 119	GSK3B	+	137	0.000144036	3.6258
BRD-K44968554	BRD-K44968554	NA	+	1	0.000147371	3.61988
BRD-K12981857	BRD-K12981857	NA	+	1	0.00015059	3.61428
BRD-A54029483	AC1NDE46	EDNRB	+	5	0.000152155	3.6116
BRD-K01595245	BRD-K01595245	NA	+	2	0.000152652	3.61076
BRD-K08999871	Pipemidic acid	NA	+	3	0.000153177	3.60987
BRD-K01493881	Apigenin	NA	+	32	0.000159455	3.59943
BRD-K24752075	BRD-K24752075	NA	+	2	0.000159492	3.59937
BRD-K88243749	BRD-K88243749	NA	+	1	0.000162268	3.59488
BRD-K76210423	Resiquimod	NA	+	9	0.000164592	3.59118
BRD-K90195324	Bazedoxifene HCl	ESR2, ESR1	+	15	0.000164725	3.59097
BRD-K09880340	BRD-K09880340	NA	+	1	0.000169438	3.58361
BRD-K99737029	BRD-K99737029	NA	+	1	0.000172469	3.57898
BRD-K08110534	BRD-K08110534	NA	+	1	0.000175335	3.57467
BRD-A67552655	RAC-Etomoxir	CPT1A	+	4	0.000175714	3.5741
BRD-K00409424	BRD-K00409424	NA	+	2	0.000177844	3.57095
BRD-K18855837	Varenicline	CHRNA4	+	5	0.000180824	3.5666
BRD-K64716493	BRD-K64716493	NA	+	1	0.000186741	3.55815
BRD-K65165610	BRD-K65165610	NA	+	1	0.000187184	3.55752
BRD-K99023089	AZD5363	NA	+	16	0.000188488	3.5557
BRD-K17498618	Cisatracurium Besylate	CHRNA1, CHRNG, CHRNB1, CHRNE, CHRND	+	10	0.000188677	3.55544
BRD-K29506255	CHEMBL1887751	NA	+	11	0.000190489	3.55292
BRD-K03725349	BRD-K03725349	NA	+	1	0.00019234	3.55038
BRD-K25412176	Afuresertib	AKT2, AKT3, AKT1	+	31	0.000192568	3.55006
BRD-K60757524	BRD-K60757524	NA	+	5	0.00019613	3.54524
BRD-K09989112	BRD-K09989112	NA	+	2	0.000201995	3.53746
BRD-K51832753	BRD-K51832753	NA	+	1	0.000207913	3.52983
BRD-A94709349	Metaxalone	NA	+	7	0.000208548	3.52902
BRD-K47147974	CHEMBL1270311	NA	+	5	0.000212815	3.52366
BRD-K40958081	BRD-K40958081	NA	+	1	0.000214971	3.52099
BRD-K08351986	BRD-K08351986	NA	+	1	0.000215652	3.52015
BRD-K33116223	CHEMBL1868923	NA	+	7	0.000216512	3.51909
BRD-K56334280	Amonafide	TOP2A	+	30	0.000216634	3.51894
BRD-K72381300	(R)-SKF-38393	DRD1, DRD5	+	2	0.000216681	3.51889
BRD-K91377183	BRD-K91377183	NA	+	1	0.000217205	3.51825
BRD-K76304753	Phenazopyridine	SCN1A, SCN2A, SCN3A, SCN4A, SCN5A, SCN7A, SCN8A, SCN9A, SCN10A, SCN11A	+	10	0.00023563	3.49658
BRD-K91731568	BRD-K91731568	NA	+	1	0.000235711	3.49649
BRD-K04238564	BRD-K04238564	NA	+	2	0.000238085	3.49382
BRD-K86816409	CHEMBL2141366	NA	+	1	0.000240594	3.49102
BRD-K13049116	BMS-754807	IGF1R, INSR	+	44	0.000241125	3.49043
BRD-K10232869	BRD-K10232869	NA	+	2	0.000255089	3.47536
BRD-K19388745	Forskolin, NKH477	NA	+	30	0.000257949	3.47236
BRD-K60636255	BRD-K60636255	NA	+	9	0.000267505	3.46259
BRD-K87782578	AVL-292	BTK	+	14	0.000268775	3.46131
BRD-K47636083	BRD-K47636083	NA	+	2	0.000270571	3.45952
BRD-K81974123	CHEMBL2357436	NA	+	1	0.000270887	3.4592
BRD-K42191735	Buparlisib	PIK3CA, PIK3CD, PIK3R2, PIK3R1, PIK3CB, PIK3CG, PIK3R5, PIK3R3	+	148	0.00028435	3.44612
BRD-K06022983	BRD-K06022983	NA	+	1	0.000290698	3.44015
BRD-A52252998	Clindamycin	NA	+	20	0.000293677	3.43739
BRD-A11605036	Thiocolchicoside	NA	+	5	0.00030436	3.4277
BRD-K63326650	KUC104223	NA	+	5	0.000305235	3.42692
BRD-K88908047	BRD-K88908047	NA	+	1	0.000307557	3.42486
BRD-K59099936	BRD-K59099936	NA	+	2	0.000308273	3.42423
BRD-K28223745	BRD-K28223745	NA	+	1	0.000314276	3.41898
BRD-A37867643	Safrolglycol	NA	+	1	0.00031873	3.41515
BRD-K69293497	BRD-K69293497	NA	+	2	0.000323697	3.41094
BRD-K59578981	BRD-K59578981	NA	+	2	0.000328991	3.40651
BRD-K85751432	Refametinib	NA	+	31	0.000329705	3.40592
BRD-K20121890	BRD-K20121890	NA	+	1	0.000330961	3.40488
BRD-K38615358	BRD-K38615358	NA	+	1	0.000342812	3.39526
BRD-K48115423	2-(4-Methoxybenzylthio)-6-methylpyrimidin-4-ol	NA	+	4	0.000343918	3.39438
BRD-K10852020	Tolcapone	COMT	+	15	0.00034511	3.39343
BRD-K31129604	BRD-K31129604	NA	+	2	0.000346519	3.39232
BRD-K21283037	Riluzole	SCN5A, SCN1A, SCN2A, SCN3A, SCN4A, SCN7A, SCN8A, SCN9A, SCN10A, SCN11A	+	31	0.000348552	3.39072
BRD-K90466405	CHEMBL2361679	NA	+	3	0.000359321	3.38237
BRD-K78816294	BRD-K78816294	NA	+	2	0.000370556	3.3739
BRD-K19601669	Ruxolitinib	JAK1, JAK2	+	11	0.000374305	3.37113
BRD-K32944375	CHEMBL1700271	NA	+	11	0.000377366	3.36888
BRD-K57293132	BRD-K57293132	NA	+	4	0.000380998	3.36624
BRD-K19898724	BRD-K19898724	NA	+	1	0.000381327	3.366
BRD-K05502425	BRD-K05502425	NA	+	1	0.000383311	3.36457
BRD-K62528537	BRD-K62528537	NA	+	1	0.000383934	3.36413
BRD-K98328967	BRD-K98328967	NA	+	1	0.000397846	3.35429
BRD-K32665240	BRD-K32665240	NA	+	2	0.000398007	3.35418
BRD-K29733039	Deforolimus	MTOR	+	11	0.000407195	3.34786
BRD-K92428153	Mycophenolate Mofetil	IMPDH1, IMPDH2	+	46	0.000412704	3.34413
BRD-K61873274	CHEMBL2361829	NA	+	2	0.000412973	3.34395
BRD-K99545815	PF-562271	PTK2, PTK2B	+	201	0.000417177	3.34114
BRD-K39529907	BRD-K39529907-019-01-2	NA	+	2	0.0004194	3.33966
BRD-K26664453	Cytochalasin B	ACTB	+	37	0.000431098	3.33201
BRD-K89735991	BRD-K89735991	NA	+	1	0.000438133	3.32751
BRD-K78691413	SA-97378	NA	+	10	0.000441424	3.32542
BRD-K55996983	BRD-K55996983	NA	+	5	0.000449204	3.32055
BRD-A84702196	STK177293	NA	+	3	0.000453534	3.31787
BRD-K51662849	Ilomastat	NA	+	36	0.000457322	3.31555
BRD-K40567080	BRD-K40567080	NA	+	2	0.000475911	3.30439
BRD-K84466663	Nelarabine	NA	+	15	0.000485062	3.29905
BRD-A02579693	etoposide	TOP2A, TOP2B	+	3	0.000490012	3.2962
BRD-K88217904	BRD-K88217904	NA	+	7	0.000490448	3.29595
BRD-A55272860	Sulpiride	DRD2, CA7, DRD3	+	25	0.000509925	3.28499
BRD-K39284479	BRD-K39284479	NA	+	3	0.000511324	3.28422
BRD-K22033393	BRD-K22033393	NA	+	6	0.000520438	3.27924
BRD-K79579182	BRD-K79579182	NA	+	1	0.000527648	3.27535
BRD-K51846078	BRD-K51846078	NA	+	1	0.000531268	3.27342
BRD-A17555397	3-(5-Hydroxy-3-benzo(b)thienyl)alanine	NA	+	2	0.00053571	3.27107
BRD-K99469929	CHEMBL2145122	NA	+	2	0.000536297	3.27076
BRD-M54407015	BRD-M54407015	NA	+	2	0.000552608	3.26228
BRD-K89014967	Pimasertib	MAP2K1, MAP2K2	+	53	0.000564835	3.25607
BRD-K02283807	Vapiprost	TBXA2R	+	5	0.000575146	3.25093
BRD-K65900075	BRD-K65900075	NA	+	1	0.000580085	3.2485
BRD-K60582191	BRD-K60582191	NA	+	2	0.000606225	3.23594
BRD-K99902401	BRD-K99902401	NA	+	1	0.000609149	3.23456
BRD-K50495309	SRC Kinase Inhibitor I	CSK, LCK	+	5	0.000625601	3.22694
BRD-K97615779	CHEMBL2132868	NA	+	2	0.000636854	3.22184
BRD-K15849229	BRD-K15849229	NA	+	1	0.000665313	3.20929
BRD-K76534306	Enrofloxacin	NA	+	14	0.000689781	3.19889
BRD-K67439147	6266-99-5	GRM5	+	32	0.000690028	3.19879
BRD-K14619660	Altrenogest	NA	+	26	0.000693809	3.19721
BRD-K97729603	Pimecrolimus	FKBP1A	+	19	0.000693983	3.19714
BRD-K96703623	CHEMBL2134588	NA	+	5	0.000704047	3.19299
BRD-K87988402	BRD-K87988402	NA	+	1	0.000706841	3.19184
BRD-K09090949	Otenabant	CNR1	+	15	0.000723581	3.18508
BRD-K29415052	BGT-226	MTOR, PIK3CD, PIK3R2, PIK3R1, PIK3CA, PIK3CB, PIK3CG, PIK3R5, PIK3R3	+	93	0.00072573	3.18422
BRD-K49956785	BRD-K49956785	NA	+	1	0.000727976	3.18332
BRD-A59985574	C23H24CLN3O5	TOP1	+	15	0.000729123	3.18287
BRD-K65182930	NVP-AUY922	NA	+	102	0.000732712	3.18145
BRD-K77175907	25-Hydroxycholecalciferol	VDR	+	11	0.00073733	3.17962
BRD-K13028566	BRD-K13028566	NA	+	2	0.00073735	3.17962
BRD-K85318537	AC1NS4MK	PLA2G1B	+	5	0.000737461	3.17957
BRD-K44640039	CHEMBL2358519	NA	+	1	0.000747037	3.17583
BRD-K45158365	Valsartan	AGTR1	+	35	0.000754762	3.17285
BRD-K37150847	SMR000031368	NA	+	10	0.00075724	3.17189
BRD-K95698191	BRD-K95698191	NA	+	1	0.000757533	3.17178
BRD-K29745382	BRD-K29745382	NA	+	2	0.000759153	3.17116
BRD-K51810646	BRD-K51810646	NA	+	5	0.000779146	3.1636
BRD-K14533651	BRD-K14533651	NA	+	1	0.000782813	3.16224
BRD-K88145757	Tributyltin Chloride	NA	+	2	0.000801995	3.15518
BRD-K53488735	BRD-K53488735	NA	+	1	0.00080521	3.15401
BRD-K93086630	BRD-K93086630	NA	+	1	0.000816407	3.14998
BRD-K79259477	NVP-BHG712	NA	+	78	0.000817384	3.14963
BRD-K46396728	BRD-K46396728	NA	+	2	0.000821738	3.14808
BRD-K56883821	CHEMBL2362782	NA	+	1	0.000827686	3.14597
BRD-K81739235	BRD-K81739235	NA	+	1	0.000846949	3.13923
BRD-K14036801	Roxithromycin	NA	+	1	0.000852244	3.13741
BRD-K98856658	SMR000173514	NA	+	7	0.000856495	3.13595
BRD-K94390294	BRD-K94390294	NA	+	1	0.000878352	3.12855
BRD-K13529284	CHEMBL2359633	NA	+	2	0.000881189	3.1276
BRD-K75094920	BRD-K75094920	NA	+	1	0.000888014	3.12533
BRD-K61388502	BRD-K61388502	NA	+	2	0.000889742	3.12476
BRD-K91966436	NCGC00018127-01	TOP2A	+	3	0.000892013	3.12401
BRD-M12187987	BRD-M12187987	NA	+	1	0.000902179	3.12068
BRD-A93353767	Isoconazole	NA	+	15	0.000905403	3.11963
BRD-K09416995	Lovastatin	HMGCR	+	26	0.000921164	3.11454
BRD-K02861439	BRD-K02861439	NA	+	1	0.000925113	3.11328
BRD-K00113100	BRD-K00113100	NA	+	1	0.000949081	3.10572
BRD-K53281329	BAY 61-3606	SYK	+	115	0.000956107	3.10354
BRD-K22861715	Chrysin	NA	+	19	0.000956273	3.10349
BRD-K60093216	BRD-K60093216	NA	+	4	0.000958561	3.10278
BRD-K92559570	KUC103884	NA	+	6	0.000970766	3.09903
BRD-K57339160	BRD-K57339160	NA	+	1	0.000984619	3.09483
BRD-K67765874	BRD-K67765874	NA	+	2	0.000988026	3.09381
BRD-K13318664	CHEMBL3184446	NA	+	5	0.000999805	3.09029
BRD-A32349859	Angolensic Acid, Methyl Ester	HTR2B	+	2	0.00100713	3.08812
BRD-K48030215	BRD-K48030215	NA	+	1	0.00101964	3.08445
BRD-K88617254	BRD-K88617254	NA	+	2	0.00104159	3.07811
BRD-K56032964	AP26113	NA	+	30	0.00105843	3.07333
BRD-K43571060	331001-62-8	NA	+	6	0.00107366	3.06906
BRD-K93331292	1-((4-Nitrophenyl)sulfonyl)-1H-benzimidazol-2-amine	NA	+	1	0.00107776	3.06792
BRD-K19412355	SB 242235	NA	+	17	0.0010827	3.06656
BRD-K17110974	Aristolochic acid	NA	+	8	0.00108565	3.06574
BRD-K37066706	SA-424170	NA	+	3	0.0010871	3.06534
BRD-K78780288	BRD-K78780288	NA	+	1	0.0010906	3.06438
BRD-A74904029	5,6-Dichlorobenzimidazole riboside	CSNK2A1	+	13	0.00110749	3.05978
BRD-K30600766	Amphotericin-B	NA	+	1	0.0011119	3.05859
BRD-K46999092	BRD-K46999092	NA	+	1	0.00112001	3.05641
BRD-K84265381	1H-Indole-3-propanoic acid, 5-hydroxy-	NA	+	1	0.00112386	3.05538
BRD-K56745457	6-Azauridine	NA	+	4	0.0011305	3.05362
BRD-K84937637	Sirolimus	MTOR, FKBP1A	+	89	0.00114361	3.05016
BRD-K49481516	Galantamine	ACHE, BCHE	+	6	0.00115527	3.04711
BRD-K29381365	BRD-K29381365	NA	+	2	0.00116045	3.04576
BRD-K08266813	BRD-K08266813	NA	+	2	0.00117257	3.04264
BRD-M72906282	BRD-M72906282	NA	+	1	0.00118142	3.04037
BRD-A62879835	Rifaximin		+	8	0.0011923	3.03761
BRD-K06217810	CHEMBL1474834	CLK1, CLK4, DYRK1A, DYRK1B	+	13	0.00123008	3.0282
BRD-K00603606	Ticlopidine	P2RY12	+	25	0.0012377	3.02633
BRD-K76665741	BRD-K76665741	NA	+	3	0.00123906	3.026
BRD-K60237333	Niacin	HCAR2, HCAR3	+	22	0.0012414	3.02543
BRD-K44084986	Y-27632	ROCK1, ROCK2	+	8	0.00124568	3.02439
BRD-K57487331	BRD-K57487331	NA	+	2	0.00124698	3.02407
BRD-K71353148	BRD-K71353148	NA	+	1	0.00125511	3.02211
BRD-K31616564	ZINC9212416	NA	+	2	0.00126641	3.01939
BRD-K16347954	BRD-K16347954	NA	+	1	0.00126759	3.01911
BRD-K31746020	BRD-K31746020	NA	+	1	0.00127936	3.01631
BRD-K37516186	BRD-K37516186	NA	+	1	0.00128161	3.01578
BRD-K86619642	BRD-K86619642	NA	+	2	0.00128374	3.01527
BRD-K21071223	BRD-K01335708	NA	+	11	0.00128786	3.0143
BRD-K90064059	BRD-K90064059	NA	+	1	0.00130366	3.0106
BRD-K97149069	BRD-K97149069	NA	+	6	0.00130757	3.00969
BRD-K64558129	CHEMBL2136504	NA	+	1	0.00131385	3.00824
BRD-A03249105	ICI 182,780	NA	+	20	0.00134723	3.0006
BRD-K68095457	Palmidrol	CNR2, GPR119	+	14	0.00135012	2.99995
BRD-K22668950	BRD-K22668950	NA	+	1	0.00136126	2.99745
BRD-K48150994	BRD-K48150994	NA	+	1	0.00137598	2.99417
BRD-K34829873	BRD-K34829873	NA	+	2	0.00138186	2.99287
BRD-K47204106	BRD-K47204106	NA	+	1	0.00138695	2.99174

## Sheet: Table S9C
Table S9C Positively correlated chemical perturbagens specific for "improver" series
PerturbagenId	Perturbagen	GeneTargets	Mechanism of action	Correlation	NoOfSignatures	pValue	zScore
BRD-A19500257	13-Hydroxy-8,14,19-trimethoxy-4,10,12,16-tetramethyl-3,20,22-trioxo-2-azabicyclo[16.3.1]docosa-1(21),4,6,10,18-pentaen-9-yl carbamate	HSP90AA1	HSP inhibitor	+	1016	5.18e-101	21.3043
BRD-A61304759	SCHEMBL16226502	HSP90AA1	HSP inhibitor	+	174	3.82e-37	12.68
BRD-U60236422	WH-4-025	NA		+	93	7.95e-33	11.8754
BRD-K19540840	Saracatinib	SRC, ABL1	SRC inhibitor	+	215	6.16e-31	11.5059
BRD-K85606544	Neratinib	EGFR, ERBB2, ERBB4	EGFR inhibitor	+	191	3.9e-30	11.3457
BRD-U51024685	noscapine	NA		+	115	2.24e-27	10.7756
BRD-K03449891	Foretinib	KDR, MET, FLT3, KIT, PDGFRB, PDGFRA, TEK, FLT1, FLT4	VEGFR inhibitor	+	147	6.03e-27	10.6842
BRD-K41783120	Apilimod	NA		+	39	1.71e-26	10.5868
BRD-K50168500	Canertinib	EGFR, ERBB2, ERBB4	EGFR inhibitor	+	172	1.47e-24	10.1619
BRD-K44227013	Ponatinib	ABL1, BCR, FLT3, RET, FGFR1, FGFR2, FGFR3, FGFR4, KIT, TEK	FLT3 inhibitor	+	107	2.05e-23	9.90156
BRD-K03390685	Cobimetinib	MAP2K1, MAP2K2	MEK inhibitor	+	35	4.74e-22	9.58242
BRD-K41859756	NVP-AUY922	HSP90AA1, HSP90AB1	HSP inhibitor	+	123	6.67e-21	9.30547
BRD-K51575138	TPCA-1	IKBKB	IKK inhibitor	+	173	1.68e-20	9.20677
BRD-K37687095	AZD-8330	MAP2K1, MAP2K2	MEK inhibitor	+	160	6.23e-19	8.81048
BRD-K70914287	Falnidamol	EGFR	EGFR inhibitor	+	42	2.82e-18	8.63942
BRD-K38852836	Ganetespib (STA-9090)	HSP90AA1, HSP90AB1	HSP inhibitor	+	34	3.67e-18	8.60938
BRD-K82244583	MEK162 (ARRY-162, ARRY-438162)	MAP2K1, MAP2K2		+	33	5.23e-18	8.56885
BRD-K68488863	ENMD-2076	AURKA, FLT3, KDR, PDGFRA, SRC, AURKB, FGFR3, KIT, CSF1R	FLT3 inhibitor	+	56	5.71e-15	7.72234
BRD-K36740062	GSK-1070916	AURKB, AURKC	Aurora kinase inhibitor	+	203	8.25e-15	7.67535
BRD-A03506276	XL888	NA		+	42	1.3e-14	7.61713
BRD-K70301465	Ibrutinib (PCI-32765)	BTK		+	26	2.46e-14	7.5341
BRD-K50140147	TAE-684	ALK	ALK tyrosine kinase receptor inhibitor	+	202	8.14e-14	7.37625
BRD-K73293050	WZ 3146	EGFR	EGFR inhibitor	+	16	1.09e-13	7.33775
BRD-A58767537	C24H25CLFN5O3	EGFR, ERBB2, ERBB4	EGFR inhibitor	+	130	2.19e-13	7.24299
BRD-K51544265	Cabozantinib	KDR, MET		+	115	5.35e-13	7.12123
BRD-K15791587	L-733060	TACR1	Tachykinin antagonist	+	11	2.15e-12	6.92688
BRD-K20285085	Tamatinib	SYK	SYK inhibitor	+	209	2.89e-12	6.88509
BRD-K68870568	Flumatinib (mesylate)	ABL1		+	24	2.55e-11	6.56786
BRD-K74381836	SA-1921456	NA		+	15	3.26e-11	6.53151
BRD-K29385665	WH-4-025	NA		+	40	3.67e-11	6.51342
BRD-K52850071	WHI-P154	JAK3, EGFR	JAK inhibitor	+	15	1.37e-10	6.31316
BRD-K57169635	Dacomitinib	EGFR, ERBB2, ERBB3, ERBB4	EGFR inhibitor	+	110	2.33e-10	6.23017
BRD-K09549677	Mibefradil	CACNA1G, CACNA1H, CACNA1C, CACNA1I	T-type calcium channel blocker	+	34	2.48e-10	6.2206
BRD-K41895714	AS-605240	PIK3CG	PI3K inhibitor	+	209	2.78e-10	6.20266
BRD-K72420232	WZ 4002	EGFR, ERBB2	EGFR inhibitor	+	122	3.46e-10	6.16792
BRD-K28392481	AZD4547	NA		+	116	4.8e-10	6.11606
BRD-K26667523	TAK-733	MAP2K1, MAP2K2		+	35	7.59e-10	6.04241
BRD-K87947369	Tozasertib	AURKA, AURKB, ABL1, AURKC, BCR, FLT3, JAK2	FLT3 inhibitor, JAK inhibitor	+	43	8.1e-10	6.03191
BRD-A10330754	AC1MG7IW	NA		+	9	8.38e-10	6.02649
BRD-K41213548	KW-2478	NA		+	31	1.01e-09	5.99624
BRD-K81225797	SCH-58261	ADORA2A, ADORA1	Adenosine receptor antagonist	+	11	2.35e-09	5.85762
BRD-K99673372	AC1L1U7X	CYSLTR1	Leukotriene receptor antagonist	+	2	2.38e-09	5.85552
BRD-M64432851	sunitinib	FLT3, KDR, KIT, FLT4, FLT1, PDGFRA, PDGFRB, RET	FTL3 inbihitor	+	14	2.7e-09	5.83429
BRD-K86930074	Cediranib	KDR, FLT1, FLT4, KIT, PDGFRB, PDGFRA	VEGFR inhibitor	+	43	9.09e-09	5.6285
BRD-K62965247	Tipifarnib	FNTA, FNTB, CHURC1-FNTB	Farnesyltransferase inhibitor	+	71	1.01e-08	5.61093
BRD-K81311598	BRD-K81311598	NA		+	1	1.2e-08	5.58095
BRD-K70464547	Sertraline HCl	NA		+	21	1.37e-08	5.5574
BRD-K77625799	Vandetanib	SRC, PTK6, TEK, KDR, FLT1, FLT4, RET, EPHA1, EPHA2, EPHA3, EPHA4, EPHA5, EPHA6, EPHA7, EPHA8, EPHA10, EPHB1, EPHB2, EPHB3, EPHB4, EPHB6, EGFR, ERBB2, ERBB3, ERBB4		+	106	1.42e-08	5.55047
BRD-A18579359	Wiskostatin	WASL		+	13	2.1e-08	5.48191
BRD-K99964838	Bosutinib	ABL1, SRC, BCR, LYN, CAMK2G, HCK	SRC inhibitor	+	150	2.25e-08	5.47035
BRD-K12343256	Trametinib	MAP2K1, MAP2K2	MEK inhibitor	+	126	2.27e-08	5.46825
BRD-K54233340	Dorsomorphin	BMPR1A, BMPR1B, PRKAA1	AMPK inhibitor	+	67	3.32e-08	5.40088
BRD-U44618005	WH-4023	ABL1, SRC	SRC inhibitor	+	11	3.84e-08	5.37449
BRD-K76694128	Rebastinib	ABL1		+	120	4.06e-08	5.36444
BRD-K22013971	BRD-K22013971	NA		+	1	4.81e-08	5.33376
BRD-K20526256	HG-14-10-04	NA		+	92	5.69e-08	5.30325
BRD-K68588778	MLS000534605	NA		+	14	7.47e-08	5.2533
BRD-K48488978	YM 201636	NA		+	108	8.94e-08	5.22011
BRD-U88459701	atorvastatin	HMGCR, DPP4		+	34	1.19e-07	5.16761
BRD-K93123848	CHIR-265	BRAF, KDR		+	127	1.55e-07	5.11681
BRD-K69726342	Atorvastatin	HMGCR, DPP4		+	32	2.15e-07	5.05509
BRD-K23499943	17-DMAG (Alvespimycin) HCl	NA		+	42	2.84e-07	5.00201
BRD-K78484446	BRD-K78484446	NA		+	1	3.12e-07	4.98338
BRD-K68336408	Tyrphostin AG-1478	EGFR	EGFR inhibitor	+	153	3.35e-07	4.9698
BRD-K16730910	Regorafenib	ABL1, RAF1, KIT, FGFR1, MAPK11, FGFR2, FRK, DDR2, BRAF, TEK, PDGFRB, PDGFRA, KDR, FLT1, FLT4, RET		+	95	3.8e-07	4.94519
BRD-K51967704	BIIB 021	HSP90AA1	HSP inhibitor	+	59	5.94e-07	4.8576
BRD-K65426421	BRD-K65426421	NA		+	2	6.88e-07	4.82852
BRD-K45937204	MLS003129326	NA		+	1	8.81e-07	4.77893
BRD-A45889380	Quinacrine	TP53		+	96	9.97e-07	4.75409
BRD-K10860596	Granisetron	HTR3A		+	6	1.15e-06	4.7259
BRD-K42728290	Infigratinib	FGFR1, FGFR2, FGFR3, FGFR4	FGFR inhibitor	+	137	1.16e-06	4.72343
BRD-K96194081	CEPHARANTHINE	NA		+	21	1.22e-06	4.71302
BRD-K82248240	SA-1925246	NA		+	2	1.31e-06	4.6987
BRD-K65455015	BRD-K65455015	NA		+	2	1.38e-06	4.6883
BRD-K86525559	AZD7762	CHEK1		+	35	1.49e-06	4.6727
BRD-K19181733	BRD-K19181733	NA		+	14	1.87e-06	4.625
BRD-K99750636	BRD-K99750636	NA		+	1	1.88e-06	4.62412
BRD-K63399564	BRD-K63399564	NA		+	9	2.55e-06	4.56079
BRD-K43578482	Defactinib	PTK2, PTK2B		+	30	2.65e-06	4.55282
BRD-K46056750	SCHEMBL1564574	CHEK1, CHEK2		+	179	3.27e-06	4.50796
BRD-K66850406	BRD-K66850406	NA		+	1	3.36e-06	4.5023
BRD-K72827473	CEP-37440	NA		+	24	3.47e-06	4.49522
BRD-K99946902	Hexylresorcinol	NA		+	3	3.74e-06	4.4794
BRD-K20722021	CEP-32496	BRAF, EGFR, RET		+	26	3.86e-06	4.47301
BRD-A14969012	SKF-83822	NA		+	4	3.96e-06	4.46737
BRD-K22749967	bupivacaine	NA		+	18	4.72e-06	4.42984
BRD-K64304398	BRD-K64304398	NA		+	9	5.22e-06	4.40775
BRD-K84085265	CG-930	MAPK8	JNK inhibitor	+	25	5.81e-06	4.38447
BRD-K26603252	PD153035 (Hydrochloride)	NA		+	13	6.09e-06	4.37428
BRD-K91859707	BRD-K91859707	NA		+	1	6.18e-06	4.37116
BRD-A68061604	BRN 1549781	NA		+	11	6.4e-06	4.36333
BRD-K23248433	GSK962040	MLNR		+	17	6.63e-06	4.35575
BRD-K44309363	Dexniguldipine	NA		+	26	6.86e-06	4.34829
BRD-K49294207	SCHEMBL2394914	EGFR	EGFR inhibitor	+	14	8.13e-06	4.31095
BRD-A42187224	5-Fluoronorepinephrine	NA		+	1	8.25e-06	4.30764
BRD-K32318651	Acyclovir	NA		+	26	1.03e-05	4.25889
BRD-K69705756	CHEMBL2360118	NA		+	5	1.11e-05	4.24245
BRD-K89997465	Chlorpromazine	DRD2, DRD3, DRD4, HTR2A, ADRA2A, ADRA2B, ADRA2C, DRD1, DRD5, HRH1, HTR1A, HTR2C, HTR6, HTR7		+	32	1.19e-05	4.22558
BRD-K45399554	MLS003448149	NA		+	47	1.2e-05	4.22493
BRD-A35869383	PCI-32765	BTK		+	129	1.34e-05	4.19826
BRD-K05686172	BRD-K05686172	NA		+	2	1.39e-05	4.19001
BRD-K75958547	Pitavastatin Calcium	HMGCR		+	38	1.41e-05	4.1868
BRD-K81473043	Tanespimycin	HSP90AA1, HSP90AB1	HSP inhibitor	+	45	1.42e-05	4.18606
BRD-K00540336	BRD-K00540336	NA		+	9	1.74e-05	4.13892
BRD-K62221994	T 98475	GNRHR		+	13	1.79e-05	4.13353
BRD-K32389477	CHEMBL2356381	NA		+	8	1.94e-05	4.11495
BRD-K61250553	Loperamide	OPRM1, OPRD1		+	63	2.01e-05	4.10614
BRD-U70626184	amcinonide	NA		+	81	2.17e-05	4.08907
BRD-K42828737	Sunitinib	CSF1R, KIT, FLT3, PDGFRB, PDGFRA, KDR, FLT1, FLT4, RET		+	85	2.43e-05	4.06189
BRD-K71281111	SNX-2112 (PF-04928473)	NA		+	30	2.97e-05	4.01528
BRD-K82036761	Sertraline	SLC6A4		+	27	2.98e-05	4.01444
BRD-K58442346	Dopamine 3-O-sulfate	DRD2, DRD1, DRD3, DRD4, DRD5		+	2	3.09e-05	4.00602
BRD-K00925050	MLS002729050	NA		+	7	3.16e-05	4.00041
BRD-K42098891	Protriptyline	SLC6A2, SLC6A4	Tricyclic antidepressant	+	33	3.31e-05	3.98958
BRD-K70327167	Suramin	FSHR, P2RY2, RYR1		+	2	3.42e-05	3.98174
BRD-K06816133	BRD-K06816133	NA		+	9	3.62e-05	3.96837
BRD-A22032524	Amlodipine	CACNA1C, CACNA1D, CACNA1S, CACNA2D1, CACNA1F		+	33	3.66e-05	3.96589
BRD-K50836978	Purvalanola	CDK1, CDK2, CDK4, CDK5	CDK inhibitor	+	15	3.9e-05	3.95054
BRD-K27721098	Clopidogrel	P2RY12		+	11	4.27e-05	3.92899
BRD-K60751982	BRD-K60751982	NA		+	1	4.29e-05	3.92734
BRD-K70490179	Rimcazole	SIGMAR1		+	26	4.44e-05	3.91907
BRD-A69815203	Cyclosporin A	PPIA, PPP3CA		+	45	4.59e-05	3.91137
BRD-K93725829	VX-11E	MAPK1		+	26	4.81e-05	3.90014
BRD-K07660364	BRD-K07660364	NA		+	1	4.86e-05	3.89743
BRD-U43867373	WH-4025	NA		+	13	4.96e-05	3.89276
BRD-K06319591	ZINC3830433	NA		+	1	5.03e-05	3.8891
BRD-K63736853	Acipimox	NA		+	17	5.53e-05	3.86606
BRD-K47000838	Cytochalasin B	NA		+	16	5.66e-05	3.86054
BRD-K66618978	BRD-K66618978	NA		+	1	5.68e-05	3.85972
BRD-K15588452	SCHEMBL5945809	HTR2A		+	11	5.78e-05	3.85528
BRD-K70792160	10-DEBC	PIM1		+	58	5.92e-05	3.84949
BRD-K88365400	CHEMBL3348993	NA		+	1	6.38e-05	3.83103
BRD-K46746423	BRD-K46746423	NA		+	1	6.95e-05	3.80978
BRD-K42677417	BRD-K42677417	NA		+	4	7.23e-05	3.80004
BRD-K62839271	BRD-K62839271	NA		+	1	7.28e-05	3.79833
BRD-K04887706	AKT Inhibitor VIII	AKT1, AKT2		+	135	7.28e-05	3.79833
BRD-K29555132	Arachidonamide	CNR1, CNR2		+	9	7.69e-05	3.78484
BRD-K14870255	R428	NA		+	20	8.01e-05	3.77471
BRD-A67616246	paroxetine	NA		+	17	8.02e-05	3.77438
BRD-K29358067	KDM-103	NA		+	4	8.19e-05	3.7692
BRD-A80793822	Pemoline	NA		+	4	9.8e-05	3.72403
BRD-K38454082	BRD-K38454082	NA		+	2	0.000103782	3.70963
BRD-K63675182	Triflupromazine	DRD2, HTR2B		+	35	0.00010485	3.70704
BRD-K87508191	BRD-K87508191	NA		+	1	0.000107913	3.69973
BRD-A10715913	N-[(1-Ethylpyrrolidin-3-yl)methyl]-2-methoxy-5-sulfamoylbenzamide	DRD2, CA7, DRD3		+	12	0.000110804	3.69302
BRD-K61553312	BRD-K61553312	NA		+	1	0.000114889	3.68381
BRD-K55070890	Cis-N,N-Dimethyl-9-(3-(1-Piperazinyl)Propylidene)Thioxanthene-2-Sulfonamide	HTR2A		+	11	0.000116192	3.68093
BRD-K40115967	BRD-K40115967	NA		+	1	0.000122327	3.66779
BRD-K17896185	Fentanyl Isothiocyanate	OPRD1		+	12	0.000126733	3.65873
BRD-K20079257	Rufinamide	SCN1A, SCN2A, SCN3A, SCN4A, SCN5A, SCN7A, SCN8A, SCN9A, SCN10A, SCN11A		+	9	0.000128108	3.65597
BRD-K29950728	Zuclomiphene	ESR1		+	44	0.000129111	3.65396
BRD-K05524748	Dronedarone HCl	CACNA1D, CACNA1C, CACNA1S, CACNA1F, SCN1A, SCN2A, SCN3A, SCN4A, SCN5A, SCN7A, SCN8A, SCN9A, SCN10A, SCN11A, KCNJ2, HCN4		+	23	0.00013363	3.64513
BRD-K94694331	BRD-K94694331	NA		+	2	0.000136836	3.63903
BRD-K06499413	CHEMBL2361739	NA		+	7	0.000143048	3.62757
BRD-K09602097	Colforsin	ADCY2	Adenylyl cyclase activator	+	47	0.000144675	3.62465
BRD-K51918615	Iodophenpropit	HRH3, HRH4		+	14	0.000146811	3.62086
BRD-K49309964	BRD-K49309964	NA		+	1	0.0001548	3.60713
BRD-K42687792	CHEMBL2359949	NA		+	14	0.000159703	3.59903
BRD-K62578746	N-(4-Chlorophenyl)-4-[hydroxy(diphenyl)methyl]piperidine-1-carbothioamide	NA		+	3	0.000163402	3.59307
BRD-K64642496	KO143	ABCG2		+	40	0.00017004	3.58268
BRD-K19687926	Lapatinib	EGFR, ERBB2	EGFR inhibitor	+	159	0.000174376	3.5761
BRD-K74155249	CHEMBL2135537	NA		+	8	0.000176172	3.57342
BRD-K95976153	BRD-K95976153	NA		+	9	0.000181106	3.56619
BRD-K24686773	CHEMBL1271119	NA		+	7	0.00018325	3.5631
BRD-K04412738	(R,R)-Tramadol	OPRM1, SLC6A2, SLC6A4		+	5	0.000186398	3.55863
BRD-K75832278	SA-84869	NA		+	7	0.000197304	3.54366
BRD-K89626439	Sirolimus	MTOR, FKBP1A		+	16	0.000207736	3.53006
BRD-K69116396	Sertindole	DRD2, HTR2A, HTR2C		+	26	0.000217947	3.51734
BRD-K89162000	Tandutinib	FLT3, KIT, PDGFRA, PDGFRB	FLT3 inhibitor	+	15	0.000225011	3.50887
BRD-K25841245	ZINC12496501	HMGCR		+	2	0.000231584	3.5012
BRD-A33711280	Methixene	CHRM5, CHRM1, HTR2C		+	20	0.000232556	3.50008
BRD-K30189597	SYK Inhibitor	SYK		+	12	0.000235662	3.49655
BRD-K76263948	BRD-K76263948	NA		+	1	0.000235902	3.49627
BRD-U37049823	HG-6-64-01	NA		+	15	0.000239797	3.4919
BRD-K04695623	BRD-K04695623	NA		+	9	0.000242195	3.48924
BRD-A50287119	SCHEMBL13586708	MTOR, FKBP1A		+	5	0.000244385	3.48684
BRD-A47598013	Citalopram	SLC6A4		+	17	0.000247312	3.48365
BRD-K43992206	VU0413243-1	NA		+	5	0.000257684	3.47264
BRD-K25433859	Maprotiline	SLC6A2		+	33	0.000267807	3.46228
BRD-K58435339	AT13387	NA		+	39	0.00026959	3.4605
BRD-K14886982	BRD-K14886982	NA		+	1	0.000273429	3.45669
BRD-K43723251	Chenodeoxycholic Acid	NA		+	16	0.000274151	3.45598
BRD-K22134346	Simvastatin	HMGCR		+	60	0.00029281	3.43819
BRD-A43331270	BRD-A43331270-001-01-6	ADRA1A, CACNA1C		+	44	0.000298941	3.43257
BRD-K36529613	PU-H-71	HSP90AA1		+	17	0.000300374	3.43128
BRD-K58772419	AZD-6482	PIK3CB, PIK3CD, PIK3CG, PIK3R2, PIK3R1, PIK3CA, PIK3R5, PIK3R3		+	117	0.000305663	3.42654
BRD-A39996500	Radicicol	NA		+	274	0.000326223	3.40882
BRD-K40454949	BRD-K40454949	NA		+	1	0.000332791	3.40338
BRD-A64933752	2-Phenylaminoadenosine	ADORA2A		+	5	0.000357924	3.38344
BRD-K76840893	RS-17053	ADRA1A		+	15	0.0003669	3.37663
BRD-K49075727	CHEMBL2136735	FLT1, FLT4, KDR, PDGFRA, FGFR1, FGFR3, PDGFRB		+	143	0.000374526	3.37097
BRD-A71262238	Nafadotride	DRD3		+	13	0.000387546	3.36154
BRD-A36151937	NSC5112	CFTR, ESR2		+	8	0.000407227	3.34784
BRD-K87343924	Wortmannin	PIK3CA, PIK3CG, PLK1	PI3K inhibitor	+	12	0.000410084	3.3459
BRD-A07875874	Cilnidipine	CACNA1B		+	13	0.000410813	3.3454
BRD-K12906962	BIO2_000029	NA		+	14	0.000425774	3.33547
BRD-A55369275	AC1MR9ZN	GABBR1, GABBR2	GABA receptor antagonist	+	2	0.00043216	3.33133
BRD-K53987533	10-{3-[4-(2-Chloroethyl)piperazin-1-yl]propyl}-2-(trifluoromethyl)-10H-phenothiazine	DRD2, DRD1		+	12	0.000433544	3.33044
BRD-K34411947	Streptozosin	NA		+	1	0.000438994	3.32696
BRD-K37991163	Paroxetine	SLC6A4		+	40	0.000443326	3.32422
BRD-K93754473	Tamoxifen	ESR1, ESR2		+	104	0.000444063	3.32376
BRD-A31159102	Fluoxetine	SLC6A4		+	33	0.000464228	3.31135
BRD-K89941546	BRD-K89941546	NA		+	2	0.000468875	3.30857
BRD-K65196043	BRD-K65196043	NA		+	1	0.000483768	3.2998
BRD-K06800040	F1743-0035	NA		+	8	0.000487452	3.29767
BRD-K55204560	CHEMBL2360158	NA		+	1	0.000495301	3.29318
BRD-K83972459	SCHEMBL16980224	AURKA		+	111	0.000509625	3.28516
BRD-K42805893	Osimertinib	EGFR, ERBB2, ERBB3, ERBB4	EGFR inhibitor	+	91	0.000517918	3.28061
BRD-K83508485	FK888	TACR1		+	44	0.000520381	3.27927
BRD-K75418563	BRD-K75418563	NA		+	8	0.000524253	3.27718
BRD-K53669914	BRD-K53669914	NA		+	1	0.000540026	3.2688
BRD-K66818636	Lomifylline	NA		+	5	0.000541233	3.26817
BRD-K43410529	MLN 2480	RAF1, ARAF, BRAF	RAF inhibitor	+	24	0.000552204	3.26248
BRD-K62687522	BRD-K62687522	NA		+	2	0.000561429	3.25778
BRD-K77987635	BRD-K77987635	NA		+	15	0.000561769	3.25761
BRD-A89585551	Mefloquine	NA		+	23	0.000576487	3.25027
BRD-K85275009	175203-39-1	NA		+	11	0.000580829	3.24813
BRD-K62374253	Rufloxacin	NA		+	3	0.000621803	3.22869
BRD-K56277358	MGCD-265	MET, AXL, MST1R, KDR, FLT1, FLT4, TEK		+	109	0.000646963	3.21732
BRD-K41185545	Ambrisentan	EDNRB, EDNRA		+	27	0.000647978	3.21687
BRD-K19352500	Prochlorperazine	DRD2		+	29	0.000654253	3.21411
BRD-K67637637	Olopatadine	HRH1		+	6	0.000657602	3.21264
BRD-K29582182	BRD-K29582182	NA		+	1	0.00066706	3.20854
BRD-K56647759	BRD-K56647759	NA		+	1	0.000670718	3.20696
BRD-K60487568	SU-4312	KDR		+	11	0.000684418	3.20114
BRD-K94441233	Mevastatin	HMGCR		+	19	0.000696138	3.19625
BRD-K94832621	Y-134	ESR1, ESR2		+	11	0.000714729	3.18864
BRD-K77830450	AC1O7M2R	ADCY2	Adenylyl cyclase activator	+	21	0.000714968	3.18854
BRD-K43151809	BRD-K43151809	NA		+	1	0.0007193	3.18679

## Sheet: Table S9D
Table S9D Positively correlated genetic perturbagens (knockdown) identified for "improver" series
GeneTarget	Pathways	Correlation	NoOfSignatures	pValue	zScore
AKR7A2	Metabolism of xenobiotics by cytochrome P450	+	14	3.65e-11	6.51418
HYAL1	Glycosaminoglycan degradation | Lysosome	+	8	2.44e-09	5.85147
LAP3	Arginine and proline metabolism | Glutathione metabolism	+	14	3.19e-09	5.80655
RPIA	Pentose phosphate pathway	+	11	5.86e-09	5.70367
CRYZ		+	13	3.94e-08	5.36987
IRF4	Th17 cell differentiation	+	4	8.86e-08	5.22182
CRK	MAPK signaling pathway | ErbB signaling pathway | Rap1 signaling pathway | Chemokine signaling pathway | Focal adhesion | Fc gamma R-mediated phagocytosis | Neurotrophin signaling pathway | Regulation of actin cytoskeleton | Insulin signaling pathway | Bacterial invasion of epithelial cells | Shigellosis | Human cytomegalovirus infection | Human immunodeficiency virus 1 infection | Pathways in ca…	+	10	2.06e-07	5.06355
KIAA1009	NA	+	9	2.11e-07	5.05913
PARG		+	8	3.29e-07	4.97346
AKAP13	Parathyroid hormone synthesis, secretion and action | Human cytomegalovirus infection	+	9	5.82e-07	4.86153
ALB	Thyroid hormone synthesis	+	9	9.03e-07	4.77395
FECH	Porphyrin and chlorophyll metabolism	+	8	1.28e-06	4.70312
MAPK1	MAPK signaling pathway | ErbB signaling pathway | Ras signaling pathway | Rap1 signaling pathway | cGMP-PKG signaling pathway | cAMP signaling pathway | Chemokine signaling pathway | HIF-1 signaling pathway | FoxO signaling pathway | Sphingolipid signaling pathway | Phospholipase D signaling pathway | Oocyte meiosis | Autophagy - animal | mTOR signaling pathway | PI3K-Akt signaling pathway | Apop…	+	12	2.06e-06	4.6055
GTPBP8		+	10	2.58e-06	4.55835
JUN	MAPK signaling pathway | ErbB signaling pathway | cAMP signaling pathway | Mitophagy - animal | Apoptosis | Wnt signaling pathway | Osteoclast differentiation | Focal adhesion | Tight junction | Toll-like receptor signaling pathway | NOD-like receptor signaling pathway | C-type lectin receptor signaling pathway | IL-17 signaling pathway | Th1 and Th2 cell differentiation | Th17 cell differentiati…	+	26	4e-06	4.46535
BZW2		+	9	4.76e-06	4.42758
CD70	Cytokine-cytokine receptor interaction	+	3	4.84e-06	4.42432
TSPAN6		+	11	6.86e-06	4.34844
FURIN		+	13	7.21e-06	4.33744
UBE3B	Ubiquitin mediated proteolysis	+	14	7.29e-06	4.33481
NPTN		+	8	7.47e-06	4.32949
FTL	Ferroptosis | Necroptosis | Mineral absorption	+	7	9.04e-06	4.28738
OTUD7A		+	9	1.16e-05	4.23241
TH	Tyrosine metabolism | Folate biosynthesis | Dopaminergic synapse | Prolactin signaling pathway | Parkinson disease | Cocaine addiction | Amphetamine addiction | Alcoholism	+	9	1.55e-05	4.16655
CRKL	MAPK signaling pathway | ErbB signaling pathway | Rap1 signaling pathway | Chemokine signaling pathway | Focal adhesion | Fc gamma R-mediated phagocytosis | Neurotrophin signaling pathway | Regulation of actin cytoskeleton | Insulin signaling pathway | Bacterial invasion of epithelial cells | Shigellosis | Human cytomegalovirus infection | Human immunodeficiency virus 1 infection | Pathways in ca…	+	24	1.66e-05	4.15039
MALT1	NF-kappa B signaling pathway | C-type lectin receptor signaling pathway | T cell receptor signaling pathway | B cell receptor signaling pathway | Tuberculosis	+	13	1.83e-05	4.12761
CSNK2A1	Ribosome biogenesis in eukaryotes | NF-kappa B signaling pathway | Mitophagy - animal | Wnt signaling pathway | Adherens junction | Measles	+	8	2.32e-05	4.07273
PSPH	Glycine, serine and threonine metabolism	+	8	2.53e-05	4.05272
BCAR1	Rap1 signaling pathway | Chemokine signaling pathway | Focal adhesion | Leukocyte transendothelial migration | Regulation of actin cytoskeleton | Bacterial invasion of epithelial cells | Human cytomegalovirus infection	+	7	3.05e-05	4.00884
NDUFB6	Oxidative phosphorylation | Thermogenesis | Retrograde endocannabinoid signaling | Non-alcoholic fatty liver disease (NAFLD) | Alzheimer disease | Parkinson disease | Huntington disease	+	10	3.16e-05	4.00056
NR1H2	Insulin resistance	+	14	3.43e-05	3.98143
TAB2	MAPK signaling pathway | NF-kappa B signaling pathway | Osteoclast differentiation | Toll-like receptor signaling pathway | NOD-like receptor signaling pathway | IL-17 signaling pathway | TNF signaling pathway | Leishmaniasis | Toxoplasmosis | Hepatitis B | Measles | Herpes simplex virus 1 infection | Epstein-Barr virus infection | Human immunodeficiency virus 1 infection	+	9	3.97e-05	3.94598
ERCC6L		+	13	4.13e-05	3.93645
SMURF1	Ubiquitin mediated proteolysis | Endocytosis | Hedgehog signaling pathway | TGF-beta signaling pathway	+	10	4.36e-05	3.92351
GTF2E2	Basal transcription factors | Viral carcinogenesis	+	13	4.64e-05	3.90848
BRAF	MAPK signaling pathway | ErbB signaling pathway | Rap1 signaling pathway | cAMP signaling pathway | Chemokine signaling pathway | FoxO signaling pathway | mTOR signaling pathway | Vascular smooth muscle contraction | Focal adhesion | Natural killer cell mediated cytotoxicity | Long-term potentiation | Neurotrophin signaling pathway | Serotonergic synapse | Long-term depression | Regulation of act…	+	26	5.13e-05	3.88435
COX4I1	Oxidative phosphorylation | Cardiac muscle contraction | Thermogenesis | Non-alcoholic fatty liver disease (NAFLD) | Alzheimer disease | Parkinson disease | Huntington disease	+	8	6.85e-05	3.81344
IL6ST	Cytokine-cytokine receptor interaction | Signaling pathways regulating pluripotency of stem cells | JAK-STAT signaling pathway | Th17 cell differentiation | Kaposi sarcoma-associated herpesvirus infection | Pathways in cancer | Viral carcinogenesis	+	10	7.35e-05	3.79595
SYNE1		+	2	7.82e-05	3.78055
GMPS	Purine metabolism | Drug metabolism - other enzymes	+	9	8.25e-05	3.76728
PRAF2		+	11	8.38e-05	3.76337
ZNF451		+	9	8.71e-05	3.75367
NDUFB4	Oxidative phosphorylation | Thermogenesis | Retrograde endocannabinoid signaling | Non-alcoholic fatty liver disease (NAFLD) | Alzheimer disease | Parkinson disease | Huntington disease	+	6	9.7e-05	3.72659
FDFT1	Steroid biosynthesis	+	13	0.000110117	3.6946
HLA-DRA	Phagosome | Cell adhesion molecules (CAMs) | Antigen processing and presentation | Hematopoietic cell lineage | Th1 and Th2 cell differentiation | Th17 cell differentiation | Intestinal immune network for IgA production | Type I diabetes mellitus | Leishmaniasis | Toxoplasmosis | Staphylococcus aureus infection | Tuberculosis | Influenza A | Human T-cell leukemia virus 1 infection | Herpes simple…	+	8	0.000113961	3.68587
DNM1	Phospholipase D signaling pathway | Endocytosis | Synaptic vesicle cycle | Endocrine and other factor-regulated calcium reabsorption | Bacterial invasion of epithelial cells	+	13	0.000121734	3.66903
CREB3L4	cGMP-PKG signaling pathway | cAMP signaling pathway | PI3K-Akt signaling pathway | AMPK signaling pathway | Longevity regulating pathway | Adrenergic signaling in cardiomyocytes | TNF signaling pathway | Thermogenesis | Cholinergic synapse | Dopaminergic synapse | Insulin secretion | Estrogen signaling pathway | Melanogenesis | Thyroid hormone synthesis | Glucagon signaling pathway | Aldosterone …	+	8	0.000140209	3.63275
FANCF	Fanconi anemia pathway	+	11	0.000154764	3.60719
IDH3A	Citrate cycle (TCA cycle)	+	8	0.000155998	3.60513
TRIB1		+	14	0.000159937	3.59865
HRAS	MAPK signaling pathway | ErbB signaling pathway | Ras signaling pathway | Rap1 signaling pathway | Chemokine signaling pathway | FoxO signaling pathway | Sphingolipid signaling pathway | Phospholipase D signaling pathway | Mitophagy - animal | Autophagy - animal | Endocytosis | mTOR signaling pathway | PI3K-Akt signaling pathway | Apoptosis | Longevity regulating pathway | Longevity regulating pa…	+	13	0.000191474	3.55156
PSEN1	Wnt signaling pathway | Notch signaling pathway | Neurotrophin signaling pathway | Alzheimer disease | Human papillomavirus infection	+	8	0.000197301	3.54367
RRAGC	Autophagy - animal | mTOR signaling pathway	+	9	0.000199418	3.54085
FEZ2		+	13	0.000205526	3.53288
ZNF136	Herpes simplex virus 1 infection	+	6	0.000229213	3.50394
NR2F1		+	10	0.000260802	3.46941
PSIP1		+	14	0.000264133	3.466
CLPP		+	8	0.000273494	3.45662
PRKCQ	NF-kappa B signaling pathway | Autophagy - animal | Vascular smooth muscle contraction | Th1 and Th2 cell differentiation | Th17 cell differentiation | T cell receptor signaling pathway | Inflammatory mediator regulation of TRP channels | Adipocytokine signaling pathway | Insulin resistance	+	8	0.000279523	3.45074
ACAT2	Fatty acid degradation | Synthesis and degradation of ketone bodies | Valine, leucine and isoleucine degradation | Lysine degradation | Tryptophan metabolism | Pyruvate metabolism | Glyoxylate and dicarboxylate metabolism | Propanoate metabolism | Butanoate metabolism | Terpenoid backbone biosynthesis | Fat digestion and absorption	+	11	0.000297369	3.434
PISD	Glycerophospholipid metabolism	+	7	0.000298521	3.43295
TSC22D1		+	9	0.000299419	3.43214
MYC	MAPK signaling pathway | ErbB signaling pathway | Cell cycle | PI3K-Akt signaling pathway | Cellular senescence | Wnt signaling pathway | TGF-beta signaling pathway | Hippo signaling pathway | Signaling pathways regulating pluripotency of stem cells | JAK-STAT signaling pathway | Thyroid hormone signaling pathway | Hepatitis C | Hepatitis B | Human cytomegalovirus infection | Human T-cell leukemi…	+	25	0.000300557	3.43111
SETD8	Lysine degradation	+	4	0.00031299	3.4201
CPD		+	8	0.000316881	3.41674
IRAK2	Neurotrophin signaling pathway | Tuberculosis	+	9	0.000323268	3.4113
ERAP1		+	10	0.000323691	3.41094
VDR	Parathyroid hormone synthesis, secretion and action | Endocrine and other factor-regulated calcium reabsorption | Mineral absorption | Tuberculosis	+	10	0.000337086	3.39987
RHOA	Ras signaling pathway | Rap1 signaling pathway | cGMP-PKG signaling pathway | cAMP signaling pathway | Chemokine signaling pathway | Sphingolipid signaling pathway | Phospholipase D signaling pathway | Endocytosis | mTOR signaling pathway | Vascular smooth muscle contraction | Wnt signaling pathway | TGF-beta signaling pathway | Axon guidance | Focal adhesion | Adherens junction | Tight junction …	+	11	0.000348119	3.39106
CCNB2	FoxO signaling pathway | Cell cycle | Oocyte meiosis | p53 signaling pathway | Cellular senescence | Progesterone-mediated oocyte maturation | Human T-cell leukemia virus 1 infection | Human immunodeficiency virus 1 infection	+	13	0.000372199	3.37268
PTP4A1		+	19	0.000389958	3.35983
TSPAN8		+	10	0.00040666	3.34822
SRC	ErbB signaling pathway | Rap1 signaling pathway | Chemokine signaling pathway | Mitophagy - animal | Endocytosis | Axon guidance | VEGF signaling pathway | Focal adhesion | Adherens junction | Tight junction | Gap junction | Platelet activation | C-type lectin receptor signaling pathway | GABAergic synapse | Inflammatory mediator regulation of TRP channels | Regulation of actin cytoskeleton | GnR…	+	12	0.000410973	3.3453
PRKAA1	FoxO signaling pathway | Autophagy - animal | mTOR signaling pathway | PI3K-Akt signaling pathway | AMPK signaling pathway | Longevity regulating pathway | Longevity regulating pathway - multiple species | Apelin signaling pathway | Tight junction | Circadian rhythm | Thermogenesis | Insulin signaling pathway | Adipocytokine signaling pathway | Oxytocin signaling pathway | Glucagon signaling path…	+	10	0.000453665	3.31779	0.05

## Sheet: Table S9E
Table S9E Positively correlated genetic perturbagens (knockdown) identified for "non-improver" series
GeneTarget	Pathways	Correlation	NoOfSignatures	pValue	zScore
FZD5	mTOR signaling pathway | Wnt signaling pathway | Hippo signaling pathway | Signaling pathways regulating pluripotency of stem cells | Melanogenesis | Cushing syndrome | Human papillomavirus infection | Pathways in cancer | Proteoglycans in cancer | Basal cell carcinoma | Breast cancer | Hepatocellular carcinoma | Gastric cancer	+	12	1.21e-14	7.62643
AKR1A1	Glycolysis / Gluconeogenesis | Pentose and glucuronate interconversions | Glycerolipid metabolism	+	13	7.65e-13	7.07179
DIDO1		+	20	1.57e-12	6.97097
GMPS	Purine metabolism | Drug metabolism - other enzymes	+	9	2.03e-12	6.93531
PPIA	Necroptosis	+	11	2.12e-12	6.92892
UBASH3A		+	10	6.87e-12	6.76056
BAG3		+	12	9.49e-12	6.7137
PPFIBP2		+	7	7.55e-11	6.40445
TLE1		+	13	1.14e-10	6.3416
DEK		+	10	2.63e-10	6.21091
TRIM38		+	9	2.93e-10	6.19422
PAPOLA	mRNA surveillance pathway	+	9	6.36e-10	6.07092
PLAT	Apelin signaling pathway | Complement and coagulation cascades | Transcriptional misregulation in cancer | Prostate cancer | Fluid shear stress and atherosclerosis	+	10	9.53e-10	6.00559
SPTLC1	Sphingolipid metabolism | Sphingolipid signaling pathway	+	9	1.19e-09	5.96952
HIF1AN		+	11	6.23e-09	5.69327
CD70	Cytokine-cytokine receptor interaction	+	3	1.02e-08	5.60916
RPS19	Ribosome	+	11	1.63e-08	5.52703
H1FOO		+	3	2.37e-08	5.46098
AFF1	Transcriptional misregulation in cancer	+	13	2.87e-08	5.42641
RALBP1	Ras signaling pathway | Pathways in cancer | Pancreatic cancer	+	11	3e-08	5.41863
HRH1	Calcium signaling pathway | Neuroactive ligand-receptor interaction | Inflammatory mediator regulation of TRP channels	+	9	3.47e-08	5.39253
TJP2	Tight junction | Vibrio cholerae infection	+	1	3.62e-08	5.38495
SLC25A28		+	9	4.27e-08	5.35545
PFAS	Purine metabolism	+	9	6.79e-08	5.27088
MLLT6		+	9	1.11e-07	5.17919
GPC1	Proteoglycans in cancer | Fluid shear stress and atherosclerosis	+	11	1.19e-07	5.16663
ISOC1		+	9	3.16e-07	4.98142
CTRB1	Pancreatic secretion | Protein digestion and absorption	+	10	4.06e-07	4.93239
UBE3B	Ubiquitin mediated proteolysis	+	14	4.06e-07	4.93225
PIAS2	Ubiquitin mediated proteolysis | JAK-STAT signaling pathway	+	11	4.56e-07	4.90991
FADS3		+	8	4.57e-07	4.90941
NFKBIA	cAMP signaling pathway | Chemokine signaling pathway | NF-kappa B signaling pathway | Apoptosis | Osteoclast differentiation | Toll-like receptor signaling pathway | NOD-like receptor signaling pathway | RIG-I-like receptor signaling pathway | Cytosolic DNA-sensing pathway | C-type lectin receptor signaling pathway | IL-17 signaling pathway | Th1 and Th2 cell differentiation | Th17 cell different…	+	13	5.09e-07	4.88826
DDIT4	Autophagy - animal | mTOR signaling pathway | PI3K-Akt signaling pathway | MicroRNAs in cancer	+	15	9.67e-07	4.76018
LAP3	Arginine and proline metabolism | Glutathione metabolism	+	14	1.04e-06	4.74518
GUK1	Purine metabolism	+	9	1.15e-06	4.72491
PHKB	Calcium signaling pathway | Insulin signaling pathway | Glucagon signaling pathway	+	13	1.28e-06	4.70372
SERPINA1	Complement and coagulation cascades	+	8	1.56e-06	4.66262
NFAT5		+	8	1.63e-06	4.65398
PARG		+	8	1.7e-06	4.64483
C9ORF96	NA	+	8	1.79e-06	4.63406
LYN	Chemokine signaling pathway | NF-kappa B signaling pathway | Platelet activation | B cell receptor signaling pathway | Fc epsilon RI signaling pathway | Fc gamma R-mediated phagocytosis | Long-term depression | Epithelial cell signaling in Helicobacter pylori infection | Kaposi sarcoma-associated herpesvirus infection | Epstein-Barr virus infection | Viral carcinogenesis	+	16	1.82e-06	4.63089
GLUD1	Arginine biosynthesis | Alanine, aspartate and glutamate metabolism | D-Glutamine and D-glutamate metabolism | Nitrogen metabolism | Necroptosis | Proximal tubule bicarbonate reclamation	+	9	1.89e-06	4.62293
GNAI2	Rap1 signaling pathway | cGMP-PKG signaling pathway | cAMP signaling pathway | Chemokine signaling pathway | Sphingolipid signaling pathway | Adrenergic signaling in cardiomyocytes | Axon guidance | Apelin signaling pathway | Gap junction | Platelet activation | Leukocyte transendothelial migration | Circadian entrainment | Retrograde endocannabinoid signaling | Glutamatergic synapse | Cholinergi…	+	12	2.23e-06	4.58858
CKS1B	Pathways in cancer | Small cell lung cancer	+	9	2.31e-06	4.58117
BHMT2	Cysteine and methionine metabolism	+	7	2.33e-06	4.57956
PSMB2	Proteasome	+	10	2.36e-06	4.57714
THAP11		+	12	2.72e-06	4.54678
LHX8		+	10	3.83e-06	4.47441
GTPBP8		+	10	5.17e-06	4.41014
TRRAP	Human T-cell leukemia virus 1 infection	+	7	6.14e-06	4.37256
ATP5B	Oxidative phosphorylation | Thermogenesis | Alzheimer disease | Parkinson disease | Huntington disease	+	9	6.67e-06	4.35461
KLHL6		+	3	7.15e-06	4.33934
RPS7	Ribosome	+	9	7.18e-06	4.33843
ZNF398	Herpes simplex virus 1 infection	+	7	7.54e-06	4.32745
HRAS	MAPK signaling pathway | ErbB signaling pathway | Ras signaling pathway | Rap1 signaling pathway | Chemokine signaling pathway | FoxO signaling pathway | Sphingolipid signaling pathway | Phospholipase D signaling pathway | Mitophagy - animal | Autophagy - animal | Endocytosis | mTOR signaling pathway | PI3K-Akt signaling pathway | Apoptosis | Longevity regulating pathway | Longevity regulating pa…	+	13	8.02e-06	4.31391
NFKBIB	Chemokine signaling pathway | NOD-like receptor signaling pathway | RIG-I-like receptor signaling pathway | Cytosolic DNA-sensing pathway | Th1 and Th2 cell differentiation | Th17 cell differentiation | T cell receptor signaling pathway | B cell receptor signaling pathway | Neurotrophin signaling pathway | Adipocytokine signaling pathway | Shigellosis | Leishmaniasis | Toxoplasmosis | Measles | I…	+	11	8.63e-06	4.29755
PDCD1LG2	Cell adhesion molecules (CAMs)	+	1	1.17e-05	4.23062
DNAJC1	Protein processing in endoplasmic reticulum	+	11	1.17e-05	4.22972
HLA-DRA	Phagosome | Cell adhesion molecules (CAMs) | Antigen processing and presentation | Hematopoietic cell lineage | Th1 and Th2 cell differentiation | Th17 cell differentiation | Intestinal immune network for IgA production | Type I diabetes mellitus | Leishmaniasis | Toxoplasmosis | Staphylococcus aureus infection | Tuberculosis | Influenza A | Human T-cell leukemia virus 1 infection | Herpes simple…	+	8	1.39e-05	4.19128
ERAP1		+	10	1.42e-05	4.18639
RP2		+	1	1.48e-05	4.17601
EDN1	cAMP signaling pathway | HIF-1 signaling pathway | Neuroactive ligand-receptor interaction | Vascular smooth muscle contraction | TNF signaling pathway | Melanogenesis | Renin secretion | Relaxin signaling pathway | AGE-RAGE signaling pathway in diabetic complications | Pathways in cancer | Hypertrophic cardiomyopathy (HCM) | Fluid shear stress and atherosclerosis	+	8	1.61e-05	4.1575
TNIP1		+	13	1.61e-05	4.15688
HRSP12		+	9	2.05e-05	4.1017
BCL7B		+	13	2.11e-05	4.09541
BCL2	NF-kappa B signaling pathway | HIF-1 signaling pathway | Sphingolipid signaling pathway | p53 signaling pathway | Autophagy - animal | Protein processing in endoplasmic reticulum | PI3K-Akt signaling pathway | Apoptosis | Apoptosis - multiple species | Necroptosis | Adrenergic signaling in cardiomyocytes | Hedgehog signaling pathway | Focal adhesion | NOD-like receptor signaling pathway | JAK-STA…	+	15	2.43e-05	4.06271
PMF1		+	11	2.44e-05	4.06114
KNDC1		+	8	2.48e-05	4.05791
ARHGAP35	Focal adhesion | Platelet activation | Leukocyte transendothelial migration | Regulation of actin cytoskeleton	+	8	2.52e-05	4.05378
PLSCR1		+	13	2.54e-05	4.05151
IGFBP4		+	8	2.58e-05	4.04842
RDBP	NA	+	8	2.83e-05	4.02697
PLAGL1		+	8	2.86e-05	4.02423
NUDT6		+	8	3.2e-05	3.9972
TIMELESS		+	8	3.25e-05	3.99422
ABL1	ErbB signaling pathway | Ras signaling pathway | Cell cycle | Axon guidance | Neurotrophin signaling pathway | Pathogenic Escherichia coli infection | Shigellosis | Pathways in cancer | MicroRNAs in cancer | Chronic myeloid leukemia | Viral myocarditis	+	13	3.68e-05	3.96408
POLR2F	RNA polymerase | Cytosolic DNA-sensing pathway | Huntington disease	+	9	3.83e-05	3.95507
PTP4A1		+	19	3.99e-05	3.94491
ITGA4	PI3K-Akt signaling pathway | Focal adhesion | ECM-receptor interaction | Cell adhesion molecules (CAMs) | Hematopoietic cell lineage | Leukocyte transendothelial migration | Intestinal immune network for IgA production | Regulation of actin cytoskeleton | Leishmaniasis | Human papillomavirus infection | Hypertrophic cardiomyopathy (HCM) | Arrhythmogenic right ventricular cardiomyopathy (ARVC) | D…	+	9	4.06e-05	3.94105
MYC	MAPK signaling pathway | ErbB signaling pathway | Cell cycle | PI3K-Akt signaling pathway | Cellular senescence | Wnt signaling pathway | TGF-beta signaling pathway | Hippo signaling pathway | Signaling pathways regulating pluripotency of stem cells | JAK-STAT signaling pathway | Thyroid hormone signaling pathway | Hepatitis C | Hepatitis B | Human cytomegalovirus infection | Human T-cell leukemi…	+	25	4.33e-05	3.92509
CCND2	FoxO signaling pathway | Cell cycle | p53 signaling pathway | PI3K-Akt signaling pathway | Cellular senescence | Wnt signaling pathway | Hedgehog signaling pathway | Hippo signaling pathway | Focal adhesion | JAK-STAT signaling pathway | Prolactin signaling pathway | Measles | Human papillomavirus infection | Human T-cell leukemia virus 1 infection | Epstein-Barr virus infection | Pathways in can…	+	10	4.43e-05	3.91995
SRPK3		+	1	4.52e-05	3.91478
KIAA0355		+	11	4.72e-05	3.90437
GRK5	Chemokine signaling pathway | Endocytosis | Morphine addiction	+	7	5.05e-05	3.88807
KIAA1804		+	2	5.45e-05	3.86961
CREBL2		+	9	5.7e-05	3.85854
SMURF1	Ubiquitin mediated proteolysis | Endocytosis | Hedgehog signaling pathway | TGF-beta signaling pathway	+	10	5.77e-05	3.85557
NEK8		+	2	5.84e-05	3.85268
AGL	Starch and sucrose metabolism	+	14	6.28e-05	3.83504
FURIN		+	13	6.57e-05	3.82369
AK3	Purine metabolism	+	9	6.6e-05	3.82271
GGPS1	Terpenoid backbone biosynthesis	+	10	6.73e-05	3.818
OR10Z1	Olfactory transduction	+	8	7.02e-05	3.80762
CXCL1	Cytokine-cytokine receptor interaction | Chemokine signaling pathway | NOD-like receptor signaling pathway | IL-17 signaling pathway | TNF signaling pathway | Epithelial cell signaling in Helicobacter pylori infection | Salmonella infection | Legionellosis | Amoebiasis | Kaposi sarcoma-associated herpesvirus infection | Rheumatoid arthritis	+	9	7.16e-05	3.80255
PPAP2B	Glycerolipid metabolism | Glycerophospholipid metabolism | Ether lipid metabolism | Sphingolipid metabolism | Phospholipase D signaling pathway | Fc gamma R-mediated phagocytosis | Fat digestion and absorption | Choline metabolism in cancer	+	9	7.36e-05	3.79588
NDUFB2	Oxidative phosphorylation | Thermogenesis | Retrograde endocannabinoid signaling | Non-alcoholic fatty liver disease (NAFLD) | Alzheimer disease | Parkinson disease | Huntington disease	+	8	7.44e-05	3.79322
UGT1A1	Pentose and glucuronate interconversions | Ascorbate and aldarate metabolism | Steroid hormone biosynthesis | Retinol metabolism | Porphyrin and chlorophyll metabolism | Metabolism of xenobiotics by cytochrome P450 | Drug metabolism - cytochrome P450 | Drug metabolism - other enzymes | Chemical carcinogenesis	+	8	9.23e-05	3.73924
TCF3	Signaling pathways regulating pluripotency of stem cells | Human T-cell leukemia virus 1 infection | Transcriptional misregulation in cancer	+	10	9.23e-05	3.73919
ERCC6L		+	13	9.28e-05	3.73784
KAT6A	Signaling pathways regulating pluripotency of stem cells	+	12	9.9e-05	3.7216
CASP7	Apoptosis | Apoptosis - multiple species | TNF signaling pathway | Non-alcoholic fatty liver disease (NAFLD) | Alzheimer disease | Pertussis | Legionellosis | Pathways in cancer	+	10	9.93e-05	3.72069
TOMM34		+	12	0.000104879	3.70697
SLC22A5	Choline metabolism in cancer	+	9	0.000106387	3.70335
UBR7		+	12	0.00010763	3.7004
ZNF136	Herpes simplex virus 1 infection	+	6	0.000109151	3.69684
GTF2E2	Basal transcription factors | Viral carcinogenesis	+	13	0.000122155	3.66815
CCNB2	FoxO signaling pathway | Cell cycle | Oocyte meiosis | p53 signaling pathway | Cellular senescence | Progesterone-mediated oocyte maturation | Human T-cell leukemia virus 1 infection | Human immunodeficiency virus 1 infection	+	13	0.000127225	3.65774
PPP2R5C	mRNA surveillance pathway | Sphingolipid signaling pathway | Oocyte meiosis | PI3K-Akt signaling pathway | AMPK signaling pathway | Adrenergic signaling in cardiomyocytes | Dopaminergic synapse | Human papillomavirus infection	+	2	0.000139036	3.63492
CIB1		+	1	0.000146552	3.62132
FFAR1	Insulin secretion	+	8	0.000148701	3.61755
PHKG1	Calcium signaling pathway | Insulin signaling pathway | Glucagon signaling pathway	+	1	0.000153966	3.60853
SLC25A20	Thermogenesis	+	9	0.000161375	3.59632
TAB2	MAPK signaling pathway | NF-kappa B signaling pathway | Osteoclast differentiation | Toll-like receptor signaling pathway | NOD-like receptor signaling pathway | IL-17 signaling pathway | TNF signaling pathway | Leishmaniasis | Toxoplasmosis | Hepatitis B | Measles | Herpes simplex virus 1 infection | Epstein-Barr virus infection | Human immunodeficiency virus 1 infection	+	9	0.000173442	3.57751
RPS6KA2	MAPK signaling pathway | Oocyte meiosis | mTOR signaling pathway | Thermogenesis | Long-term potentiation | Neurotrophin signaling pathway | Progesterone-mediated oocyte maturation | Insulin resistance	+	9	0.000178042	3.57066
MTOR	ErbB signaling pathway | HIF-1 signaling pathway | Phospholipase D signaling pathway | Autophagy - other | Autophagy - animal | mTOR signaling pathway | PI3K-Akt signaling pathway | AMPK signaling pathway | Longevity regulating pathway | Longevity regulating pathway - multiple species | Cellular senescence | Apelin signaling pathway | JAK-STAT signaling pathway | Th17 cell differentiation | Therm…	+	24	0.000178774	3.56958
FRAT1	Wnt signaling pathway | Pathways in cancer | Breast cancer | Hepatocellular carcinoma | Gastric cancer	+	8	0.000185675	3.55965
PHF23		+	9	0.000202362	3.53698
ENDOG	Apoptosis	+	8	0.000205549	3.53286
NPTN		+	8	0.000207603	3.53022
GMNN		+	11	0.00020947	3.52786
RAB11A	Endocytosis | Endocrine and other factor-regulated calcium reabsorption | Vasopressin-regulated water reabsorption | Pancreatic secretion | Influenza A	+	9	0.000212762	3.52373
NOL3		+	11	0.000212904	3.52355
FZD4	mTOR signaling pathway | Wnt signaling pathway | Hippo signaling pathway | Signaling pathways regulating pluripotency of stem cells | Melanogenesis | Cushing syndrome | Human papillomavirus infection | Pathways in cancer | Proteoglycans in cancer | Basal cell carcinoma | Breast cancer | Hepatocellular carcinoma | Gastric cancer	+	9	0.000224372	3.50962
SRC	ErbB signaling pathway | Rap1 signaling pathway | Chemokine signaling pathway | Mitophagy - animal | Endocytosis | Axon guidance | VEGF signaling pathway | Focal adhesion | Adherens junction | Tight junction | Gap junction | Platelet activation | C-type lectin receptor signaling pathway | GABAergic synapse | Inflammatory mediator regulation of TRP channels | Regulation of actin cytoskeleton | GnR…	+	12	0.000225489	3.5083
FOXO4	Ras signaling pathway | FoxO signaling pathway	+	11	0.000232568	3.50007
ITGA2	Phagosome | PI3K-Akt signaling pathway | Focal adhesion | ECM-receptor interaction | Platelet activation | Hematopoietic cell lineage | Regulation of actin cytoskeleton | Human papillomavirus infection | Pathways in cancer | Proteoglycans in cancer | Small cell lung cancer | Hypertrophic cardiomyopathy (HCM) | Arrhythmogenic right ventricular cardiomyopathy (ARVC) | Dilated cardiomyopathy (DCM)	+	8	0.000240416	3.49121
TNFRSF13B	Cytokine-cytokine receptor interaction | Intestinal immune network for IgA production | Primary immunodeficiency	+	4	0.000243981	3.48728
PLK3	FoxO signaling pathway | C-type lectin receptor signaling pathway | Tuberculosis	+	2	0.0002593	3.47096
TRERF1		+	4	0.000264681	3.46544
ZBTB41		+	8	0.00027966	3.45061
AURKAIP1		+	9	0.000285953	3.4446
MAP3K4	MAPK signaling pathway | GnRH signaling pathway	+	12	0.000287581	3.44306
GYG1	Starch and sucrose metabolism	+	8	0.000312407	3.42061
EPC1		+	7	0.000324273	3.41046
ZNF689	Herpes simplex virus 1 infection	+	8	0.000329965	3.40571
PTPN1	Adherens junction | Insulin signaling pathway | Insulin resistance	+	13	0.000332322	3.40376
MYCBP2		+	11	0.000333918	3.40245
HSPD1	RNA degradation | Type I diabetes mellitus | Legionellosis | Tuberculosis	+	8	0.000349504	3.38997
ROCK2	cGMP-PKG signaling pathway | cAMP signaling pathway | Chemokine signaling pathway | Sphingolipid signaling pathway | Vascular smooth muscle contraction | Wnt signaling pathway | Axon guidance | Focal adhesion | Tight junction | Platelet activation | Leukocyte transendothelial migration | Regulation of actin cytoskeleton | Oxytocin signaling pathway | Pathogenic Escherichia coli infection | Shigel…	+	10	0.000358354	3.38311
LYRM1		+	12	0.000398357	3.35393
KCNK15		+	4	0.000430617	3.33233
TARDBP		+	11	0.000445515	3.32285
FGF2	MAPK signaling pathway | Ras signaling pathway | Rap1 signaling pathway | PI3K-Akt signaling pathway | Signaling pathways regulating pluripotency of stem cells | Regulation of actin cytoskeleton | Kaposi sarcoma-associated herpesvirus infection | Pathways in cancer | Proteoglycans in cancer | Melanoma | Breast cancer | Gastric cancer	+	11	0.00045787	3.31521
PRPSAP2		+	7	0.000475109	3.30487
F2R	Rap1 signaling pathway | Calcium signaling pathway | cAMP signaling pathway | Phospholipase D signaling pathway | Neuroactive ligand-receptor interaction | PI3K-Akt signaling pathway | Complement and coagulation cascades | Platelet activation | Regulation of actin cytoskeleton | Pathways in cancer	+	8	0.000484841	3.29918
ERBB2IP	NOD-like receptor signaling pathway	+	3	0.00048617	3.29841
ACO2	Citrate cycle (TCA cycle) | Glyoxylate and dicarboxylate metabolism	+	12	0.000486641	3.29814
DCK	Purine metabolism | Pyrimidine metabolism	+	14	0.000499368	3.29088
ALDOC	Glycolysis / Gluconeogenesis | Pentose phosphate pathway | Fructose and mannose metabolism	+	13	0.000502667	3.28903
ESD		+	8	0.000518834	3.28011
ZNF451		+	9	0.000564224	3.25637
TCFL5		+	13	0.000594461	3.24152
SLC9A1	cAMP signaling pathway | Cardiac muscle contraction | Adrenergic signaling in cardiomyocytes | Apelin signaling pathway | Regulation of actin cytoskeleton | Thyroid hormone signaling pathway | Salivary secretion | Gastric acid secretion | Pancreatic secretion | Bile secretion | Proteoglycans in cancer	+	9	0.000600028	3.23887
PSEN1	Wnt signaling pathway | Notch signaling pathway | Neurotrophin signaling pathway | Alzheimer disease | Human papillomavirus infection	+	8	0.000616865	3.23097
IL18RAP	Cytokine-cytokine receptor interaction | Inflammatory bowel disease (IBD)	+	11	0.000626983	3.22631
SRPK2		+	1	0.000664015	3.20985
RPS6	Ribosome | HIF-1 signaling pathway | mTOR signaling pathway | PI3K-Akt signaling pathway | Apelin signaling pathway | Thermogenesis | Insulin signaling pathway | Proteoglycans in cancer	+	22	0.000679586	3.20318
CIR1	Notch signaling pathway | Epstein-Barr virus infection	+	8	0.00071719	3.18764
APOA1	PPAR signaling pathway | Fat digestion and absorption | Vitamin digestion and absorption | Cholesterol metabolism | African trypanosomiasis	+	8	0.000725608	3.18427
DYRK3		+	14	0.000734524	3.18073
KDR	MAPK signaling pathway | Ras signaling pathway | Rap1 signaling pathway | PI3K-Akt signaling pathway | VEGF signaling pathway | Focal adhesion | Proteoglycans in cancer | Fluid shear stress and atherosclerosis	+	11	0.000743073	3.17738
FGG	Complement and coagulation cascades | Platelet activation | Staphylococcus aureus infection	+	9	0.000758471	3.17142
TCIRG1	Oxidative phosphorylation | Lysosome | Phagosome | Synaptic vesicle cycle | Collecting duct acid secretion | Vibrio cholerae infection | Epithelial cell signaling in Helicobacter pylori infection | Tuberculosis | Human papillomavirus infection | Rheumatoid arthritis	+	12	0.000767981	3.1678
BLOC1S1		+	8	0.000780746	3.16301
SIM2		+	7	0.00081501	3.15048
NOD1	NOD-like receptor signaling pathway | Epithelial cell signaling in Helicobacter pylori infection | Shigellosis | Pertussis	+	10	0.000819168	3.14899
RNF166		+	9	0.000830024	3.14514
TMEM109		+	11	0.000968813	3.09963
PSPH	Glycine, serine and threonine metabolism	+	8	0.000992601	3.09244
COX5B	Oxidative phosphorylation | Cardiac muscle contraction | Thermogenesis | Non-alcoholic fatty liver disease (NAFLD) | Alzheimer disease | Parkinson disease | Huntington disease	+	9	0.00103547	3.07986
ATF3		+	10	0.0010427	3.07779
KCNJ11	Insulin secretion | Type II diabetes mellitus	+	9	0.00108639	3.06554
PFKP	Glycolysis / Gluconeogenesis | Pentose phosphate pathway | Fructose and mannose metabolism | Galactose metabolism | RNA degradation | AMPK signaling pathway | Thyroid hormone signaling pathway | Central carbon metabolism in cancer	+	1	0.00108963	3.06465
RAD51C	Homologous recombination | Fanconi anemia pathway	+	10	0.00111661	3.05733
NCOR2	Notch signaling pathway | Epstein-Barr virus infection	+	10	0.00113097	3.05349
P4HA2	Arginine and proline metabolism	+	13	0.0011325	3.05309
PLOD3	Lysine degradation | Other types of O-glycan biosynthesis	+	13	0.00115417	3.04739
CEP55		+	11	0.00116516	3.04455
ATRX		+	8	0.00119927	3.03586
HHEX	Maturity onset diabetes of the young | Transcriptional misregulation in cancer	+	7	0.0012084	3.03357
KIF13B		+	1	0.00121898	3.03094
HK3	Glycolysis / Gluconeogenesis | Fructose and mannose metabolism | Galactose metabolism | Starch and sucrose metabolism | Amino sugar and nucleotide sugar metabolism | Neomycin, kanamycin and gentamicin biosynthesis | HIF-1 signaling pathway | Insulin signaling pathway | Type II diabetes mellitus | Carbohydrate digestion and absorption | Central carbon metabolism in cancer	+	1	0.00124474	3.02462
BACE2	Alzheimer disease	+	11	0.00126805	3.019
CYCS	p53 signaling pathway | Apoptosis | Apoptosis - multiple species | Non-alcoholic fatty liver disease (NAFLD) | Alzheimer disease | Parkinson disease | Amyotrophic lateral sclerosis (ALS) | Huntington disease | Legionellosis | Toxoplasmosis | Tuberculosis | Hepatitis C | Hepatitis B | Measles | Human cytomegalovirus infection | Influenza A | Kaposi sarcoma-associated herpesvirus infection | Herpes…	+	10	0.00127355	3.01769
HDAC6	Alcoholism | Viral carcinogenesis	+	15	0.00130205	3.01098
ORC1	Cell cycle	+	8	0.00132841	3.00489
RRAGA	Autophagy - animal | mTOR signaling pathway	+	11	0.00132902	3.00475

## Sheet: Table S9F
Table S9F Positively correlated genetic perturbagens (knockdown) specific for "improver" series
GeneTarget	Pathways	Correlation	NoOfSignatures	pValue	zScore
AKR7A2	Metabolism of xenobiotics by cytochrome P450	+	14	3.65e-11	6.51418
HYAL1	Glycosaminoglycan degradation | Lysosome	+	8	2.44e-09	5.85147
RPIA	Pentose phosphate pathway	+	11	5.86e-09	5.70367
CRYZ		+	13	3.94e-08	5.36987
IRF4	Th17 cell differentiation	+	4	8.86e-08	5.22182
CRK	MAPK signaling pathway | ErbB signaling pathway | Rap1 signaling pathway | Chemokine signaling pathway | Focal adhesion | Fc gamma R-mediated phagocytosis | Neurotrophin signaling pathway | Regulation of actin cytoskeleton | Insulin signaling pathway | Bacterial invasion of epithelial cells | Shigellosis | Human cytomegalovirus infection | Human immunodeficiency virus 1 infection | Pathways in ca…	+	10	2.06e-07	5.06355
KIAA1009	NA	+	9	2.11e-07	5.05913
AKAP13	Parathyroid hormone synthesis, secretion and action | Human cytomegalovirus infection	+	9	5.82e-07	4.86153
ALB	Thyroid hormone synthesis	+	9	9.03e-07	4.77395
FECH	Porphyrin and chlorophyll metabolism	+	8	1.28e-06	4.70312
MAPK1	MAPK signaling pathway | ErbB signaling pathway | Ras signaling pathway | Rap1 signaling pathway | cGMP-PKG signaling pathway | cAMP signaling pathway | Chemokine signaling pathway | HIF-1 signaling pathway | FoxO signaling pathway | Sphingolipid signaling pathway | Phospholipase D signaling pathway | Oocyte meiosis | Autophagy - animal | mTOR signaling pathway | PI3K-Akt signaling pathway | Apop…	+	12	2.06e-06	4.6055
JUN	MAPK signaling pathway | ErbB signaling pathway | cAMP signaling pathway | Mitophagy - animal | Apoptosis | Wnt signaling pathway | Osteoclast differentiation | Focal adhesion | Tight junction | Toll-like receptor signaling pathway | NOD-like receptor signaling pathway | C-type lectin receptor signaling pathway | IL-17 signaling pathway | Th1 and Th2 cell differentiation | Th17 cell differentiati…	+	26	4e-06	4.46535
BZW2		+	9	4.76e-06	4.42758
TSPAN6		+	11	6.86e-06	4.34844
FTL	Ferroptosis | Necroptosis | Mineral absorption	+	7	9.04e-06	4.28738
OTUD7A		+	9	1.16e-05	4.23241
TH	Tyrosine metabolism | Folate biosynthesis | Dopaminergic synapse | Prolactin signaling pathway | Parkinson disease | Cocaine addiction | Amphetamine addiction | Alcoholism	+	9	1.55e-05	4.16655
CRKL	MAPK signaling pathway | ErbB signaling pathway | Rap1 signaling pathway | Chemokine signaling pathway | Focal adhesion | Fc gamma R-mediated phagocytosis | Neurotrophin signaling pathway | Regulation of actin cytoskeleton | Insulin signaling pathway | Bacterial invasion of epithelial cells | Shigellosis | Human cytomegalovirus infection | Human immunodeficiency virus 1 infection | Pathways in ca…	+	24	1.66e-05	4.15039
MALT1	NF-kappa B signaling pathway | C-type lectin receptor signaling pathway | T cell receptor signaling pathway | B cell receptor signaling pathway | Tuberculosis	+	13	1.83e-05	4.12761
CSNK2A1	Ribosome biogenesis in eukaryotes | NF-kappa B signaling pathway | Mitophagy - animal | Wnt signaling pathway | Adherens junction | Measles	+	8	2.32e-05	4.07273
BCAR1	Rap1 signaling pathway | Chemokine signaling pathway | Focal adhesion | Leukocyte transendothelial migration | Regulation of actin cytoskeleton | Bacterial invasion of epithelial cells | Human cytomegalovirus infection	+	7	3.05e-05	4.00884
NDUFB6	Oxidative phosphorylation | Thermogenesis | Retrograde endocannabinoid signaling | Non-alcoholic fatty liver disease (NAFLD) | Alzheimer disease | Parkinson disease | Huntington disease	+	10	3.16e-05	4.00056
NR1H2	Insulin resistance	+	14	3.43e-05	3.98143
BRAF	MAPK signaling pathway | ErbB signaling pathway | Rap1 signaling pathway | cAMP signaling pathway | Chemokine signaling pathway | FoxO signaling pathway | mTOR signaling pathway | Vascular smooth muscle contraction | Focal adhesion | Natural killer cell mediated cytotoxicity | Long-term potentiation | Neurotrophin signaling pathway | Serotonergic synapse | Long-term depression | Regulation of act…	+	26	5.13e-05	3.88435
COX4I1	Oxidative phosphorylation | Cardiac muscle contraction | Thermogenesis | Non-alcoholic fatty liver disease (NAFLD) | Alzheimer disease | Parkinson disease | Huntington disease	+	8	6.85e-05	3.81344
IL6ST	Cytokine-cytokine receptor interaction | Signaling pathways regulating pluripotency of stem cells | JAK-STAT signaling pathway | Th17 cell differentiation | Kaposi sarcoma-associated herpesvirus infection | Pathways in cancer | Viral carcinogenesis	+	10	7.35e-05	3.79595
SYNE1		+	2	7.82e-05	3.78055
PRAF2		+	11	8.38e-05	3.76337
NDUFB4	Oxidative phosphorylation | Thermogenesis | Retrograde endocannabinoid signaling | Non-alcoholic fatty liver disease (NAFLD) | Alzheimer disease | Parkinson disease | Huntington disease	+	6	9.7e-05	3.72659
FDFT1	Steroid biosynthesis	+	13	0.000110117	3.6946
DNM1	Phospholipase D signaling pathway | Endocytosis | Synaptic vesicle cycle | Endocrine and other factor-regulated calcium reabsorption | Bacterial invasion of epithelial cells	+	13	0.000121734	3.66903
CREB3L4	cGMP-PKG signaling pathway | cAMP signaling pathway | PI3K-Akt signaling pathway | AMPK signaling pathway | Longevity regulating pathway | Adrenergic signaling in cardiomyocytes | TNF signaling pathway | Thermogenesis | Cholinergic synapse | Dopaminergic synapse | Insulin secretion | Estrogen signaling pathway | Melanogenesis | Thyroid hormone synthesis | Glucagon signaling pathway | Aldosterone …	+	8	0.000140209	3.63275
FANCF	Fanconi anemia pathway	+	11	0.000154764	3.60719
IDH3A	Citrate cycle (TCA cycle)	+	8	0.000155998	3.60513
TRIB1		+	14	0.000159937	3.59865
RRAGC	Autophagy - animal | mTOR signaling pathway	+	9	0.000199418	3.54085
FEZ2		+	13	0.000205526	3.53288
NR2F1		+	10	0.000260802	3.46941
PSIP1		+	14	0.000264133	3.466
CLPP		+	8	0.000273494	3.45662
PRKCQ	NF-kappa B signaling pathway | Autophagy - animal | Vascular smooth muscle contraction | Th1 and Th2 cell differentiation | Th17 cell differentiation | T cell receptor signaling pathway | Inflammatory mediator regulation of TRP channels | Adipocytokine signaling pathway | Insulin resistance	+	8	0.000279523	3.45074
ACAT2	Fatty acid degradation | Synthesis and degradation of ketone bodies | Valine, leucine and isoleucine degradation | Lysine degradation | Tryptophan metabolism | Pyruvate metabolism | Glyoxylate and dicarboxylate metabolism | Propanoate metabolism | Butanoate metabolism | Terpenoid backbone biosynthesis | Fat digestion and absorption	+	11	0.000297369	3.434
PISD	Glycerophospholipid metabolism	+	7	0.000298521	3.43295
TSC22D1		+	9	0.000299419	3.43214
SETD8	Lysine degradation	+	4	0.00031299	3.4201
CPD		+	8	0.000316881	3.41674
IRAK2	Neurotrophin signaling pathway | Tuberculosis	+	9	0.000323268	3.4113
VDR	Parathyroid hormone synthesis, secretion and action | Endocrine and other factor-regulated calcium reabsorption | Mineral absorption | Tuberculosis	+	10	0.000337086	3.39987
RHOA	Ras signaling pathway | Rap1 signaling pathway | cGMP-PKG signaling pathway | cAMP signaling pathway | Chemokine signaling pathway | Sphingolipid signaling pathway | Phospholipase D signaling pathway | Endocytosis | mTOR signaling pathway | Vascular smooth muscle contraction | Wnt signaling pathway | TGF-beta signaling pathway | Axon guidance | Focal adhesion | Adherens junction | Tight junction …	+	11	0.000348119	3.39106
TSPAN8		+	10	0.00040666	3.34822
PRKAA1	FoxO signaling pathway | Autophagy - animal | mTOR signaling pathway | PI3K-Akt signaling pathway | AMPK signaling pathway | Longevity regulating pathway | Longevity regulating pathway - multiple species | Apelin signaling pathway | Tight junction | Circadian rhythm | Thermogenesis | Insulin signaling pathway | Adipocytokine signaling pathway | Oxytocin signaling pathway | Glucagon signaling path…	+	10	0.000453665	3.31779
