# Supplementary material for: Recovery of human type 2 diabetes beta cell function associates with transcriptomic signatures that point to novel therapeutic targets
Source: Research Square preprint supplement (doi:10.21203/rs.3.rs-871924/v1), 2021-09-03
Supplement: Supplementary file 8 [file f796e8c08396294b8e03d132.xlsx]

## Sheet: Improvers_Cult_vs_Basal
TableS3a. Genes differentially expressed (False Discovery Rate, FDR<0.05) between Improvers_Cultured vs Basal.
Upregulated
Gene	Gene.name	Gene.description	mean_Improvers_Cultured	mean_Improvers_Basal	logFC	P.Value	adj.P.Val
ENSG00000090382	LYZ	lysozyme [Source:HGNC Symbol;Acc:HGNC:6740]	354.346	62.298	2.51731	1.48332e-06	0.0124368
ENSG00000136881	BAAT	bile acid-CoA:amino acid N-acyltransferase [Source:HGNC Symbol;Acc:HGNC:932]	4.918	1.02	2.29226	2.42791e-06	0.0124368
ENSG00000198848	CES1	carboxylesterase 1 [Source:HGNC Symbol;Acc:HGNC:1863]	26.808	5.616	2.18705	3.17631e-06	0.0124368
ENSG00000241635	UGT1A1	UDP glucuronosyltransferase family 1 member A1 [Source:HGNC Symbol;Acc:HGNC:12530]	1.384	0.082	3.24273	2.45347e-05	0.0144994
ENSG00000162896	PIGR	polymeric immunoglobulin receptor [Source:HGNC Symbol;Acc:HGNC:8968]	64.654	9.484	3.03357	2.50062e-05	0.0144994
ENSG00000146039	SLC17A4	solute carrier family 17 member 4 [Source:HGNC Symbol;Acc:HGNC:10932]	2.384	0.344	2.80404	1.28758e-05	0.0144994
ENSG00000099953	MMP11	matrix metallopeptidase 11 [Source:HGNC Symbol;Acc:HGNC:7157]	18.084	3.424	2.67145	7.11236e-06	0.0144994
ENSG00000146755	TRIM50	tripartite motif containing 50 [Source:HGNC Symbol;Acc:HGNC:19017]	2.054	0.438	2.54164	2.78158e-05	0.0144994
ENSG00000106927	AMBP	alpha-1-microglobulin/bikunin precursor [Source:HGNC Symbol;Acc:HGNC:453]	89.254	14.244	2.47048	1.42806e-05	0.0144994
ENSG00000143387	CTSK	cathepsin K [Source:HGNC Symbol;Acc:HGNC:2536]	31.574	7.894	2.01198	3.75613e-05	0.0144994
ENSG00000231389	HLA-DPA1	major histocompatibility complex, class II, DP alpha 1 [Source:HGNC Symbol;Acc:HGNC:4938]	38.052	10.764	1.95865	4.35533e-05	0.0144994
ENSG00000127249	ATP13A4	ATPase 13A4 [Source:HGNC Symbol;Acc:HGNC:25422]	3.716	1.076	1.85372	2.43005e-05	0.0144994
ENSG00000138755	CXCL9	C-X-C motif chemokine ligand 9 [Source:HGNC Symbol;Acc:HGNC:7098]	1.564	0.488	1.68186	2.60308e-05	0.0144994
ENSG00000086696	HSD17B2	hydroxysteroid 17-beta dehydrogenase 2 [Source:HGNC Symbol;Acc:HGNC:5211]	11.926	4.746	1.42857	4.27376e-05	0.0144994
ENSG00000133048	CHI3L1	chitinase 3 like 1 [Source:HGNC Symbol;Acc:HGNC:1932]	10.58	4.078	1.36956	3.9884e-05	0.0144994
ENSG00000179583	CIITA	class II major histocompatibility complex transactivator [Source:HGNC Symbol;Acc:HGNC:7067]	2.086	0.788	1.35363	2.1651e-05	0.0144994
ENSG00000109819	PPARGC1A	PPARG coactivator 1 alpha [Source:HGNC Symbol;Acc:HGNC:9237]	5.944	2.774	1.34344	2.08257e-05	0.0144994
ENSG00000150594	ADRA2A	adrenoceptor alpha 2A [Source:HGNC Symbol;Acc:HGNC:281]	5.12	2.162	1.23677	3.75982e-05	0.0144994
ENSG00000095932	SMIM24	small integral membrane protein 24 [Source:HGNC Symbol;Acc:HGNC:37244]	59.12	27.958	1.04966	1.53496e-05	0.0144994
ENSG00000117984	CTSD	cathepsin D [Source:HGNC Symbol;Acc:HGNC:2529]	560.024	309.054	0.983638	1.70807e-05	0.0144994
ENSG00000007062	PROM1	prominin 1 [Source:HGNC Symbol;Acc:HGNC:9454]	24.66	12.51	0.966112	2.94714e-05	0.0144994
ENSG00000104763	ASAH1	N-acylsphingosine amidohydrolase 1 [Source:HGNC Symbol;Acc:HGNC:735]	183.682	109.182	0.788692	2.61318e-05	0.0144994
ENSG00000259436	AC010247.2		0.826	0.09	3.37499	4.64001e-05	0.0146845
ENSG00000143847	PPFIA4	PTPRF interacting protein alpha 4 [Source:HGNC Symbol;Acc:HGNC:9248]	0.602	0.226	2.4452	5.53176e-05	0.0146845
ENSG00000132514	CLEC10A	C-type lectin domain containing 10A [Source:HGNC Symbol;Acc:HGNC:16916]	3.864	1.072	2.03276	5.42939e-05	0.0146845
ENSG00000204287	HLA-DRA	major histocompatibility complex, class II, DR alpha [Source:HGNC Symbol;Acc:HGNC:4947]	45.152	11.6	2.02165	5.45607e-05	0.0146845
ENSG00000284928	AL445205.1		3.714	1.136	1.51794	4.81266e-05	0.0146845
ENSG00000102575	ACP5	acid phosphatase 5, tartrate resistant [Source:HGNC Symbol;Acc:HGNC:124]	80.602	43.474	0.96258	5.22844e-05	0.0146845
ENSG00000119655	NPC2	NPC intracellular cholesterol transporter 2 [Source:HGNC Symbol;Acc:HGNC:14537]	315.212	185.582	0.714894	5.0112e-05	0.0146845
ENSG00000168955	TM4SF20	transmembrane 4 L six family member 20 [Source:HGNC Symbol;Acc:HGNC:26230]	1.072	0.034	5.50982	6.03867e-05	0.0155045
ENSG00000105609	LILRB5	leukocyte immunoglobulin like receptor B5 [Source:HGNC Symbol;Acc:HGNC:6609]	1.146	0.26	2.27564	6.01465e-05	0.0155045
ENSG00000130600	H19	H19, imprinted maternally expressed transcript (non-protein coding) [Source:HGNC Symbol;Acc:HGNC:4713]	28.164	5.964	1.92494	6.8611e-05	0.0167904
ENSG00000142619	PADI3	peptidyl arginine deiminase 3 [Source:HGNC Symbol;Acc:HGNC:18337]	1.546	0.184	3.6913	7.64453e-05	0.0178699
ENSG00000139329	LUM	lumican [Source:HGNC Symbol;Acc:HGNC:6724]	79.422	32.532	1.45205	7.89618e-05	0.0181868
ENSG00000154864	PIEZO2	piezo type mechanosensitive ion channel component 2 [Source:HGNC Symbol;Acc:HGNC:26270]	2.292	1.208	0.942866	8.60294e-05	0.0187138
ENSG00000206384	COL6A6	collagen type VI alpha 6 chain [Source:HGNC Symbol;Acc:HGNC:27023]	0.508	0.078	2.53665	8.92387e-05	0.0188873
ENSG00000039537	C6	complement C6 [Source:HGNC Symbol;Acc:HGNC:1339]	7.468	1.038	2.87108	0.000107603	0.0198515
ENSG00000196126	HLA-DRB1	major histocompatibility complex, class II, DR beta 1 [Source:HGNC Symbol;Acc:HGNC:4948]	10.666	3.49	1.91788	0.000105409	0.0198515
ENSG00000160183	TMPRSS3	transmembrane serine protease 3 [Source:HGNC Symbol;Acc:HGNC:11877]	4.264	1.114	1.84875	0.000104651	0.0198515
ENSG00000170419	VSTM2A	V-set and transmembrane domain containing 2A [Source:HGNC Symbol;Acc:HGNC:28499]	5.082	2.646	1.10717	0.000105092	0.0198515
ENSG00000117472	TSPAN1	tetraspanin 1 [Source:HGNC Symbol;Acc:HGNC:20657]	49.502	26.43	0.913503	0.000103545	0.0198515
ENSG00000213373	LINC00671	long intergenic non-protein coding RNA 671 [Source:HGNC Symbol;Acc:HGNC:44339]	0.832	0.12	2.8416	0.000128773	0.019935
ENSG00000088926	F11	coagulation factor XI [Source:HGNC Symbol;Acc:HGNC:3529]	8.74	3.314	1.31274	0.00012367	0.019935
ENSG00000021300	PLEKHB1	pleckstrin homology domain containing B1 [Source:HGNC Symbol;Acc:HGNC:19079]	13.598	6.748	1.14669	0.000125322	0.019935
ENSG00000176533	GNG7	G protein subunit gamma 7 [Source:HGNC Symbol;Acc:HGNC:4410]	3.906	2.19	0.843395	0.000124636	0.019935
ENSG00000196743	GM2A	GM2 ganglioside activator [Source:HGNC Symbol;Acc:HGNC:4367]	23.106	13.362	0.743382	0.00012378	0.019935
ENSG00000250722	SELENOP	selenoprotein P [Source:HGNC Symbol;Acc:HGNC:10751]	78.144	54.646	0.650462	0.000131726	0.0200265
ENSG00000133110	POSTN	periostin [Source:HGNC Symbol;Acc:HGNC:16953]	53.262	12.778	2.87481	0.000143666	0.0202788
ENSG00000188338	SLC38A3	solute carrier family 38 member 3 [Source:HGNC Symbol;Acc:HGNC:18044]	3.386	0.594	2.39236	0.000147131	0.0202788
ENSG00000204252	HLA-DOA	major histocompatibility complex, class II, DO alpha [Source:HGNC Symbol;Acc:HGNC:4936]	1.278	0.328	2.15202	0.000148573	0.0202788
ENSG00000173467	AGR3	anterior gradient 3, protein disulphide isomerase family member [Source:HGNC Symbol;Acc:HGNC:24167]	9.802	2.416	1.98429	0.000142409	0.0202788
ENSG00000099994	SUSD2	sushi domain containing 2 [Source:HGNC Symbol;Acc:HGNC:30667]	2.884	0.866	1.94955	0.000153532	0.0202788
ENSG00000242574	HLA-DMB	major histocompatibility complex, class II, DM beta [Source:HGNC Symbol;Acc:HGNC:4935]	18.71	5.916	1.87792	0.000156642	0.0202788
ENSG00000204257	HLA-DMA	major histocompatibility complex, class II, DM alpha [Source:HGNC Symbol;Acc:HGNC:4934]	21.256	6.988	1.57486	0.000156783	0.0202788
ENSG00000147614	ATP6V0D2	ATPase H+ transporting V0 subunit d2 [Source:HGNC Symbol;Acc:HGNC:18266]	2.438	0.898	1.45728	0.000146298	0.0202788
ENSG00000138769	CDKL2	cyclin dependent kinase like 2 [Source:HGNC Symbol;Acc:HGNC:1782]	1.484	0.714	1.12713	0.000151753	0.0202788
ENSG00000127324	TSPAN8	tetraspanin 8 [Source:HGNC Symbol;Acc:HGNC:11855]	172.842	42.338	1.86548	0.00016771	0.020505
ENSG00000136235	GPNMB	glycoprotein nmb [Source:HGNC Symbol;Acc:HGNC:4462]	67.438	44.882	1.03433	0.000166291	0.020505
ENSG00000104870	FCGRT	Fc fragment of IgG receptor and transporter [Source:HGNC Symbol;Acc:HGNC:3621]	39.122	22.546	0.757467	0.000168711	0.020505
ENSG00000120594	PLXDC2	plexin domain containing 2 [Source:HGNC Symbol;Acc:HGNC:21013]	5.858	3.802	0.742851	0.000167053	0.020505
ENSG00000196620	UGT2B15	UDP glucuronosyltransferase family 2 member B15 [Source:HGNC Symbol;Acc:HGNC:12546]	15.352	3.488	2.10006	0.000170342	0.0205222
ENSG00000164694	FNDC1	fibronectin type III domain containing 1 [Source:HGNC Symbol;Acc:HGNC:21184]	0.248	0.05	2.58339	0.000185981	0.0215932
ENSG00000130592	LSP1	lymphocyte-specific protein 1 [Source:HGNC Symbol;Acc:HGNC:6707]	7.5	2.518	1.66166	0.000186124	0.0215932
ENSG00000171759	PAH	phenylalanine hydroxylase [Source:HGNC Symbol;Acc:HGNC:8582]	5.666	1.852	1.52634	0.000183545	0.0215932
ENSG00000134827	TCN1	transcobalamin 1 [Source:HGNC Symbol;Acc:HGNC:11652]	57.502	6.314	3.28378	0.000203908	0.0220563
ENSG00000204128	C2orf72	chromosome 2 open reading frame 72 [Source:HGNC Symbol;Acc:HGNC:27418]	5.4	2.588	0.997069	0.00019453	0.0220563
ENSG00000197629	MPEG1	macrophage expressed 1 [Source:HGNC Symbol;Acc:HGNC:29619]	4.834	1.644	1.4225	0.000210998	0.0221049
ENSG00000151117	TMEM86A	transmembrane protein 86A [Source:HGNC Symbol;Acc:HGNC:26890]	4.48	2.438	0.879611	0.000211705	0.0221049
ENSG00000245648	AC022075.1		9.142	2.096	1.94818	0.000215537	0.0222814
ENSG00000196502	SULT1A1	sulfotransferase family 1A member 1 [Source:HGNC Symbol;Acc:HGNC:11453]	11.21	6.104	0.762942	0.000216242	0.0222814
ENSG00000064601	CTSA	cathepsin A [Source:HGNC Symbol;Acc:HGNC:9251]	168.648	103.844	0.643637	0.000219547	0.0224308
ENSG00000160593	JAML	junction adhesion molecule like [Source:HGNC Symbol;Acc:HGNC:19084]	4.53	0.508	2.76372	0.000225475	0.0225494
ENSG00000042980	ADAM28	ADAM metallopeptidase domain 28 [Source:HGNC Symbol;Acc:HGNC:206]	3.49	1.108	1.50078	0.000226644	0.0225494
ENSG00000106066	CPVL	carboxypeptidase, vitellogenic like [Source:HGNC Symbol;Acc:HGNC:14399]	3.892	1.48	1.37713	0.000234952	0.0229989
ENSG00000136720	HS6ST1	heparan sulfate 6-O-sulfotransferase 1 [Source:HGNC Symbol;Acc:HGNC:5201]	21.77	14.2	0.571395	0.000240252	0.0232273
ENSG00000173369	C1QB	complement C1q B chain [Source:HGNC Symbol;Acc:HGNC:1242]	18.172	2.704	2.61078	0.000245632	0.0236018
ENSG00000223865	HLA-DPB1	major histocompatibility complex, class II, DP beta 1 [Source:HGNC Symbol;Acc:HGNC:4940]	22.31	10.666	1.62137	0.000256548	0.0237759
ENSG00000254815	AP006284.1		2.21	0.686	1.60936	0.000256553	0.0237759
ENSG00000130513	GDF15	growth differentiation factor 15 [Source:HGNC Symbol;Acc:HGNC:30142]	151.216	77.58	0.869498	0.000256393	0.0237759
ENSG00000092421	SEMA6A	semaphorin 6A [Source:HGNC Symbol;Acc:HGNC:10738]	10.538	7.704	0.63559	0.000255343	0.0237759
ENSG00000187908	DMBT1	deleted in malignant brain tumors 1 [Source:HGNC Symbol;Acc:HGNC:2926]	10.49	1.756	2.10463	0.000258253	0.0237927
ENSG00000167183	PRR15L	proline rich 15 like [Source:HGNC Symbol;Acc:HGNC:28149]	17.866	10.534	0.692915	0.000260305	0.0238415
ENSG00000127951	FGL2	fibrinogen like 2 [Source:HGNC Symbol;Acc:HGNC:3696]	6.804	1.632	1.97448	0.000278998	0.024549
ENSG00000075826	SEC31B	SEC31 homolog B, COPII coat complex component [Source:HGNC Symbol;Acc:HGNC:23197]	4.45	2.17	1.038	0.00027751	0.024549
ENSG00000105707	HPN	hepsin [Source:HGNC Symbol;Acc:HGNC:5155]	19.76	11.254	0.832374	0.000279002	0.024549
ENSG00000198203	SULT1C2	sulfotransferase family 1C member 2 [Source:HGNC Symbol;Acc:HGNC:11456]	6.064	1.886	2.0155	0.000287563	0.0251609
ENSG00000247095	MIR210HG	MIR210 host gene [Source:HGNC Symbol;Acc:HGNC:39524]	3.626	1.762	1.03634	0.00029168	0.0253794
ENSG00000107537	PHYH	phytanoyl-CoA 2-hydroxylase [Source:HGNC Symbol;Acc:HGNC:8940]	31.028	19.514	0.664749	0.000296314	0.0254993
ENSG00000213614	HEXA	hexosaminidase subunit alpha [Source:HGNC Symbol;Acc:HGNC:4878]	134.334	88.716	0.604966	0.000295292	0.0254993
ENSG00000170271	FAXDC2	fatty acid hydroxylase domain containing 2 [Source:HGNC Symbol;Acc:HGNC:1334]	4.288	2.132	1.22597	0.000302362	0.0255978
ENSG00000196569	LAMA2	laminin subunit alpha 2 [Source:HGNC Symbol;Acc:HGNC:6482]	2.778	1.646	0.911042	0.000300384	0.0255978
ENSG00000169550	MUC15	mucin 15, cell surface associated [Source:HGNC Symbol;Acc:HGNC:14956]	2.428	0.452	2.44208	0.000309745	0.0258044
ENSG00000235269	LINC02331	long intergenic non-protein coding RNA 2331 [Source:HGNC Symbol;Acc:HGNC:53251]	1.618	0.428	1.9554	0.000317424	0.0261657
ENSG00000164946	FREM1	FRAS1 related extracellular matrix 1 [Source:HGNC Symbol;Acc:HGNC:23399]	0.652	0.24	1.53403	0.000317206	0.0261657
ENSG00000110077	MS4A6A	membrane spanning 4-domains A6A [Source:HGNC Symbol;Acc:HGNC:13375]	4.316	0.844	2.67613	0.000337049	0.0269451
ENSG00000106331	PAX4	paired box 4 [Source:HGNC Symbol;Acc:HGNC:8618]	0.874	0.354	1.5295	0.000328898	0.0269451
ENSG00000163453	IGFBP7	insulin like growth factor binding protein 7 [Source:HGNC Symbol;Acc:HGNC:5476]	224.112	133.44	0.674328	0.000330943	0.0269451
ENSG00000170775	GPR37	G protein-coupled receptor 37 [Source:HGNC Symbol;Acc:HGNC:4494]	2.008	1.02	0.947088	0.000342181	0.0270668
ENSG00000145284	SCD5	stearoyl-CoA desaturase 5 [Source:HGNC Symbol;Acc:HGNC:21088]	59.936	38.348	0.59509	0.000341001	0.0270668
ENSG00000102837	OLFM4	olfactomedin 4 [Source:HGNC Symbol;Acc:HGNC:17190]	620.724	215.316	1.86382	0.000349658	0.0271471
ENSG00000176945	MUC20	mucin 20, cell surface associated [Source:HGNC Symbol;Acc:HGNC:23282]	26.954	10.79	1.51829	0.000349651	0.0271471
ENSG00000110628	SLC22A18	solute carrier family 22 member 18 [Source:HGNC Symbol;Acc:HGNC:10964]	4.398	1.906	1.15169	0.000348574	0.0271471
ENSG00000110013	SIAE	sialic acid acetylesterase [Source:HGNC Symbol;Acc:HGNC:18187]	18.848	8.746	1.00503	0.00036142	0.0278846
ENSG00000173805	HAP1	huntingtin associated protein 1 [Source:HGNC Symbol;Acc:HGNC:4812]	5.896	3.196	0.809487	0.000363243	0.0278878
ENSG00000070731	ST6GALNAC2	ST6 N-acetylgalactosaminide alpha-2,6-sialyltransferase 2 [Source:HGNC Symbol;Acc:HGNC:10867]	5.262	1.654	1.55454	0.000374443	0.028331
ENSG00000157502	MUM1L1	MUM1 like 1 [Source:HGNC Symbol;Acc:HGNC:26583]	3.966	1.982	0.966495	0.000374213	0.028331
ENSG00000012504	NR1H4	nuclear receptor subfamily 1 group H member 4 [Source:HGNC Symbol;Acc:HGNC:7967]	5.058	1.494	1.78633	0.000385179	0.0287604
ENSG00000184925	LCN12	lipocalin 12 [Source:HGNC Symbol;Acc:HGNC:28733]	5.618	2.858	0.95576	0.000394782	0.0291655
ENSG00000139626	ITGB7	integrin subunit beta 7 [Source:HGNC Symbol;Acc:HGNC:6162]	4.222	1.502	1.62273	0.000399415	0.0292863
ENSG00000106536	POU6F2	POU class 6 homeobox 2 [Source:HGNC Symbol;Acc:HGNC:21694]	2.092	1.054	0.991203	0.000401266	0.0292863
ENSG00000088386	SLC15A1	solute carrier family 15 member 1 [Source:HGNC Symbol;Acc:HGNC:10920]	3.938	1.958	0.865498	0.000402027	0.0292863
ENSG00000148735	PLEKHS1	pleckstrin homology domain containing S1 [Source:HGNC Symbol;Acc:HGNC:26285]	2.748	0.548	2.08038	0.000423164	0.029456
ENSG00000174469	CNTNAP2	contactin associated protein like 2 [Source:HGNC Symbol;Acc:HGNC:13830]	0.486	0.17	1.74766	0.000419846	0.029456
ENSG00000287837			2.172	0.616	1.46547	0.000417632	0.029456
ENSG00000243137	PSG4	pregnancy specific beta-1-glycoprotein 4 [Source:HGNC Symbol;Acc:HGNC:9521]	7.052	2.756	1.11724	0.000414086	0.029456
ENSG00000153822	KCNJ16	potassium voltage-gated channel subfamily J member 16 [Source:HGNC Symbol;Acc:HGNC:6262]	9.704	4.472	1.02867	0.00040972	0.029456
ENSG00000169083	AR	androgen receptor [Source:HGNC Symbol;Acc:HGNC:644]	0.802	0.46	0.94732	0.000419868	0.029456
ENSG00000167283	ATP5MG	ATP synthase membrane subunit g [Source:HGNC Symbol;Acc:HGNC:14247]	202.434	182.21	0.642228	0.000408306	0.029456
ENSG00000116774	OLFML3	olfactomedin like 3 [Source:HGNC Symbol;Acc:HGNC:24956]	4.462	1.576	1.44025	0.000435715	0.0296703
ENSG00000064787	BCAS1	breast carcinoma amplified sequence 1 [Source:HGNC Symbol;Acc:HGNC:974]	0.836	0.392	1.32767	0.000435001	0.0296703
ENSG00000133943	DGLUCY	D-glutamate cyclase [Source:HGNC Symbol;Acc:HGNC:20498]	19.48	12.302	0.621182	0.000431215	0.0296703
ENSG00000070526	ST6GALNAC1	ST6 N-acetylgalactosaminide alpha-2,6-sialyltransferase 1 [Source:HGNC Symbol;Acc:HGNC:23614]	1.41	0.712	1.13085	0.000441844	0.0299574
ENSG00000213366	GSTM2	glutathione S-transferase mu 2 [Source:HGNC Symbol;Acc:HGNC:4634]	29.874	16.294	0.993531	0.000467239	0.031008
ENSG00000173372	C1QA	complement C1q A chain [Source:HGNC Symbol;Acc:HGNC:1241]	14.168	1.606	2.91446	0.000475149	0.031268
ENSG00000138079	SLC3A1	solute carrier family 3 member 1 [Source:HGNC Symbol;Acc:HGNC:11025]	53.554	15.832	1.61907	0.000482223	0.0313249
ENSG00000122335	SERAC1	serine active site containing 1 [Source:HGNC Symbol;Acc:HGNC:21061]	11.092	7.912	0.524706	0.000495569	0.0318099
ENSG00000101443	WFDC2	WAP four-disulfide core domain 2 [Source:HGNC Symbol;Acc:HGNC:15939]	38.296	14.608	1.34463	0.000499433	0.0318494
ENSG00000197119	SLC25A29	solute carrier family 25 member 29 [Source:HGNC Symbol;Acc:HGNC:20116]	12.384	10.146	0.544997	0.00051158	0.0320495
ENSG00000198774	RASSF9	Ras association domain family member 9 [Source:HGNC Symbol;Acc:HGNC:15739]	0.61	0.272	1.05525	0.000526137	0.0326728
ENSG00000100321	SYNGR1	synaptogyrin 1 [Source:HGNC Symbol;Acc:HGNC:11498]	10.51	5.91	0.858718	0.000526005	0.0326728
ENSG00000146700	SSC4D	scavenger receptor cysteine rich family member with 4 domains [Source:HGNC Symbol;Acc:HGNC:14461]	1.56	0.644	1.34507	0.000532388	0.0326991
ENSG00000163492	CCDC141	coiled-coil domain containing 141 [Source:HGNC Symbol;Acc:HGNC:26821]	0.886	0.364	1.28939	0.000531598	0.0326991
ENSG00000129009	ISLR	immunoglobulin superfamily containing leucine rich repeat [Source:HGNC Symbol;Acc:HGNC:6133]	13.828	3.546	2.4743	0.000555471	0.033259
ENSG00000203685	STUM	stum, mechanosensory transduction mediator homolog [Source:HGNC Symbol;Acc:HGNC:30491]	0.35	0.078	2.20557	0.000566988	0.033259
ENSG00000135917	SLC19A3	solute carrier family 19 member 3 [Source:HGNC Symbol;Acc:HGNC:16266]	4.536	1.01	2.107	0.000559033	0.033259
ENSG00000163624	CDS1	CDP-diacylglycerol synthase 1 [Source:HGNC Symbol;Acc:HGNC:1800]	9.388	5.97	0.596583	0.000557699	0.033259
ENSG00000157873	TNFRSF14	TNF receptor superfamily member 14 [Source:HGNC Symbol;Acc:HGNC:11912]	31.948	21.998	0.556886	0.000564124	0.033259
ENSG00000167123	CERCAM	cerebral endothelial cell adhesion molecule [Source:HGNC Symbol;Acc:HGNC:23723]	18.596	12.458	0.560681	0.000573018	0.0333629
ENSG00000188833	ENTPD8	ectonucleoside triphosphate diphosphohydrolase 8 [Source:HGNC Symbol;Acc:HGNC:24860]	0.906	0.356	1.36814	0.000587374	0.0336976
ENSG00000116005	PCYOX1	prenylcysteine oxidase 1 [Source:HGNC Symbol;Acc:HGNC:20588]	27.846	18.614	0.600358	0.000581095	0.0336976
ENSG00000198502	HLA-DRB5	major histocompatibility complex, class II, DR beta 5 [Source:HGNC Symbol;Acc:HGNC:4953]	0.71	0.228	1.73845	0.000590934	0.0337781
ENSG00000166415	WDR72	WD repeat domain 72 [Source:HGNC Symbol;Acc:HGNC:26790]	1.796	0.552	1.8315	0.000604345	0.0341587
ENSG00000167964	RAB26	RAB26, member RAS oncogene family [Source:HGNC Symbol;Acc:HGNC:14259]	25.102	13.564	0.834117	0.000615682	0.0344386
ENSG00000115290	GRB14	growth factor receptor bound protein 14 [Source:HGNC Symbol;Acc:HGNC:4565]	9.09	4.18	0.797772	0.000625797	0.0346333
ENSG00000214021	TTLL3	tubulin tyrosine ligase like 3 [Source:HGNC Symbol;Acc:HGNC:24483]	12.178	7.958	0.651478	0.000623238	0.0346333
ENSG00000017427	IGF1	insulin like growth factor 1 [Source:HGNC Symbol;Acc:HGNC:5464]	0.86	0.532	1.38133	0.000638166	0.0349474
ENSG00000135220	UGT2A3	UDP glucuronosyltransferase family 2 member A3 [Source:HGNC Symbol;Acc:HGNC:28528]	15.164	10.37	0.662521	0.000637996	0.0349474
ENSG00000253417	LINC02159	long intergenic non-protein coding RNA 2159 [Source:HGNC Symbol;Acc:HGNC:27749]	3.056	0.808	1.88401	0.000663351	0.0362
ENSG00000130598	TNNI2	troponin I2, fast skeletal type [Source:HGNC Symbol;Acc:HGNC:11946]	1.63	0.724	1.29555	0.000667695	0.0363106
ENSG00000134533	RERG	RAS like estrogen regulated growth inhibitor [Source:HGNC Symbol;Acc:HGNC:15980]	5.206	2.932	0.788884	0.000676341	0.0366535
ENSG00000185339	TCN2	transcobalamin 2 [Source:HGNC Symbol;Acc:HGNC:11653]	11.766	7.996	0.572189	0.000686504	0.036822
ENSG00000135144	DTX1	deltex E3 ubiquitin ligase 1 [Source:HGNC Symbol;Acc:HGNC:3060]	3.498	1.53	1.18753	0.000708223	0.0372221
ENSG00000063180	CA11	carbonic anhydrase 11 [Source:HGNC Symbol;Acc:HGNC:1370]	29.426	22.776	0.603945	0.000704195	0.0372221
ENSG00000136883	KIF12	kinesin family member 12 [Source:HGNC Symbol;Acc:HGNC:21495]	33.29	19.196	0.758319	0.000710777	0.0372236
ENSG00000149043	SYT8	synaptotagmin 8 [Source:HGNC Symbol;Acc:HGNC:19264]	6.278	2.102	1.28984	0.000726785	0.037817
ENSG00000087076	HSD17B14	hydroxysteroid 17-beta dehydrogenase 14 [Source:HGNC Symbol;Acc:HGNC:23238]	37.804	24.032	0.62781	0.000729534	0.0378343
ENSG00000102524	TNFSF13B	TNF superfamily member 13b [Source:HGNC Symbol;Acc:HGNC:11929]	1.666	0.484	1.60197	0.000752036	0.0385793
ENSG00000075651	PLD1	phospholipase D1 [Source:HGNC Symbol;Acc:HGNC:9067]	12.18	7.754	0.757503	0.000756216	0.0385793
ENSG00000169413	RNASE6	ribonuclease A family member k6 [Source:HGNC Symbol;Acc:HGNC:10048]	3.466	0.476	2.6373	0.000770349	0.039046
ENSG00000163520	FBLN2	fibulin 2 [Source:HGNC Symbol;Acc:HGNC:3601]	2.1	1.13	1.04873	0.000768444	0.039046
ENSG00000174080	CTSF	cathepsin F [Source:HGNC Symbol;Acc:HGNC:2531]	20.442	10.904	0.92062	0.000778648	0.0393393
ENSG00000196735	HLA-DQA1	major histocompatibility complex, class II, DQ alpha 1 [Source:HGNC Symbol;Acc:HGNC:4942]	7.928	2.642	1.23141	0.000786301	0.0394713
ENSG00000125966	MMP24	matrix metallopeptidase 24 [Source:HGNC Symbol;Acc:HGNC:7172]	5.014	3.332	0.571883	0.000785946	0.0394713
ENSG00000183801	OLFML1	olfactomedin like 1 [Source:HGNC Symbol;Acc:HGNC:24473]	1.784	0.808	1.4963	0.00079117	0.0395888
ENSG00000138764	CCNG2	cyclin G2 [Source:HGNC Symbol;Acc:HGNC:1593]	21.362	12.064	0.91198	0.000799449	0.0398757
ENSG00000186377	CYP4X1	cytochrome P450 family 4 subfamily X member 1 [Source:HGNC Symbol;Acc:HGNC:20244]	1.624	0.144	2.9964	0.000809924	0.0401425
ENSG00000178826	TMEM139	transmembrane protein 139 [Source:HGNC Symbol;Acc:HGNC:22058]	7.088	2.718	1.33205	0.000815832	0.0402943
ENSG00000068078	FGFR3	fibroblast growth factor receptor 3 [Source:HGNC Symbol;Acc:HGNC:3690]	3.678	1.716	1.05563	0.000818644	0.0402943
ENSG00000156381	ANKRD9	ankyrin repeat domain 9 [Source:HGNC Symbol;Acc:HGNC:20096]	2.506	1.574	0.761496	0.000822136	0.0402943
ENSG00000155659	VSIG4	V-set and immunoglobulin domain containing 4 [Source:HGNC Symbol;Acc:HGNC:17032]	5.76	1.62	1.95589	0.000843315	0.0403923
ENSG00000151490	PTPRO	protein tyrosine phosphatase, receptor type O [Source:HGNC Symbol;Acc:HGNC:9678]	0.6	0.31	1.199	0.000833609	0.0403923
ENSG00000049860	HEXB	hexosaminidase subunit beta [Source:HGNC Symbol;Acc:HGNC:4879]	185.178	122.45	0.566474	0.000831779	0.0403923
ENSG00000131482	G6PC	glucose-6-phosphatase catalytic subunit [Source:HGNC Symbol;Acc:HGNC:4056]	0.992	0.206	2.41772	0.000878916	0.0408071
ENSG00000041353	RAB27B	RAB27B, member RAS oncogene family [Source:HGNC Symbol;Acc:HGNC:9767]	5.228	3.316	0.802921	0.000881234	0.0408071
ENSG00000182366	FAM87A	family with sequence similarity 87 member A [Source:HGNC Symbol;Acc:HGNC:27233]	0.478	0.15	1.51967	0.000909258	0.0415184
ENSG00000006606	CCL26	C-C motif chemokine ligand 26 [Source:HGNC Symbol;Acc:HGNC:10625]	16.514	2.08	2.76018	0.000928518	0.0422486
ENSG00000167165	UGT1A6	UDP glucuronosyltransferase family 1 member A6 [Source:HGNC Symbol;Acc:HGNC:12538]	11.554	4.038	1.81225	0.000944902	0.0424781
ENSG00000027644	INSRR	insulin receptor related receptor [Source:HGNC Symbol;Acc:HGNC:6093]	0.454	0.14	1.46882	0.000960847	0.0424781
ENSG00000148702	HABP2	hyaluronan binding protein 2 [Source:HGNC Symbol;Acc:HGNC:4798]	24.774	9.722	1.20301	0.000949961	0.0424781
ENSG00000110680	CALCA	calcitonin related polypeptide alpha [Source:HGNC Symbol;Acc:HGNC:1437]	4.196	2.124	0.988449	0.000962822	0.0424781
ENSG00000101323	HAO1	hydroxyacid oxidase 1 [Source:HGNC Symbol;Acc:HGNC:4809]	2.912	1.672	0.820077	0.000948946	0.0424781
ENSG00000115457	IGFBP2	insulin like growth factor binding protein 2 [Source:HGNC Symbol;Acc:HGNC:5471]	115.156	71.14	0.701422	0.000955107	0.0424781
ENSG00000210082	MT-RNR2	mitochondrially encoded 16S RNA [Source:HGNC Symbol;Acc:HGNC:7471]	4919.78	3149.28	0.627785	0.000951931	0.0424781
ENSG00000158473	CD1D	CD1d molecule [Source:HGNC Symbol;Acc:HGNC:1637]	0.872	0.21	1.97562	0.000969514	0.0426532
ENSG00000019582	CD74	CD74 molecule [Source:HGNC Symbol;Acc:HGNC:1697]	216.544	97.544	1.43959	0.000976954	0.0428601
ENSG00000025039	RRAGD	Ras related GTP binding D [Source:HGNC Symbol;Acc:HGNC:19903]	36.678	24.728	0.637741	0.000986575	0.043037
ENSG00000228262	LINC01320	long intergenic non-protein coding RNA 1320 [Source:HGNC Symbol;Acc:HGNC:50526]	0.864	0.218	2.09505	0.000998648	0.0432067
ENSG00000112276	BVES	blood vessel epicardial substance [Source:HGNC Symbol;Acc:HGNC:1152]	3.324	1.662	0.992361	0.00101092	0.0434973
ENSG00000115884	SDC1	syndecan 1 [Source:HGNC Symbol;Acc:HGNC:10658]	13.542	8.536	0.594655	0.00100897	0.0434973
ENSG00000080493	SLC4A4	solute carrier family 4 member 4 [Source:HGNC Symbol;Acc:HGNC:11030]	40.684	21.84	0.844209	0.00102891	0.0440296
ENSG00000100024	UPB1	beta-ureidopropionase 1 [Source:HGNC Symbol;Acc:HGNC:16297]	1.374	0.382	1.51067	0.00104153	0.0440876
ENSG00000135077	HAVCR2	hepatitis A virus cellular receptor 2 [Source:HGNC Symbol;Acc:HGNC:18437]	1.802	0.73	1.25593	0.00103628	0.0440876
ENSG00000188921	HACD4	3-hydroxyacyl-CoA dehydratase 4 [Source:HGNC Symbol;Acc:HGNC:20920]	0.31	0.122	1.22434	0.00103973	0.0440876
ENSG00000150893	FREM2	FRAS1 related extracellular matrix protein 2 [Source:HGNC Symbol;Acc:HGNC:25396]	0.882	0.518	1.00237	0.00103812	0.0440876
ENSG00000000971	CFH	complement factor H [Source:HGNC Symbol;Acc:HGNC:4883]	8.856	3.78	1.2508	0.00105888	0.0443427
ENSG00000049089	COL9A2	collagen type IX alpha 2 chain [Source:HGNC Symbol;Acc:HGNC:2218]	7.04	3.432	1.10648	0.00107167	0.0446396
ENSG00000066468	FGFR2	fibroblast growth factor receptor 2 [Source:HGNC Symbol;Acc:HGNC:3689]	5.734	2.652	1.05898	0.00108905	0.0448861
ENSG00000135094	SDS	serine dehydratase [Source:HGNC Symbol;Acc:HGNC:10691]	18.096	9.254	0.862693	0.00108706	0.0448861
ENSG00000123836	PFKFB2	6-phosphofructo-2-kinase/fructose-2,6-biphosphatase 2 [Source:HGNC Symbol;Acc:HGNC:8873]	41.38	28	0.491761	0.00110037	0.0449078
ENSG00000243709	LEFTY1	left-right determination factor 1 [Source:HGNC Symbol;Acc:HGNC:6552]	3.128	0.454	3.11324	0.00112468	0.045282
ENSG00000156413	FUT6	fucosyltransferase 6 [Source:HGNC Symbol;Acc:HGNC:4017]	3.448	1.168	1.50195	0.00112342	0.045282
ENSG00000140835	CHST4	carbohydrate sulfotransferase 4 [Source:HGNC Symbol;Acc:HGNC:1972]	2.884	1.276	1.18234	0.00112341	0.045282
ENSG00000115525	ST3GAL5	ST3 beta-galactoside alpha-2,3-sialyltransferase 5 [Source:HGNC Symbol;Acc:HGNC:10872]	13.112	7.84	0.671826	0.00114111	0.0454761
ENSG00000167608	TMC4	transmembrane channel like 4 [Source:HGNC Symbol;Acc:HGNC:22998]	43.394	27.77	0.557759	0.00114445	0.0454934
ENSG00000188611	ASAH2	N-acylsphingosine amidohydrolase 2 [Source:HGNC Symbol;Acc:HGNC:18860]	3.536	1.512	1.40661	0.00115889	0.0455214
ENSG00000100290	BIK	BCL2 interacting killer [Source:HGNC Symbol;Acc:HGNC:1051]	5.744	2.278	1.30865	0.0011565	0.0455214
ENSG00000101134	DOK5	docking protein 5 [Source:HGNC Symbol;Acc:HGNC:16173]	1.762	0.902	1.07487	0.00115544	0.0455214
ENSG00000102048	ASB9	ankyrin repeat and SOCS box containing 9 [Source:HGNC Symbol;Acc:HGNC:17184]	24.848	16.29	0.667425	0.00114817	0.0455214
ENSG00000143036	SLC44A3	solute carrier family 44 member 3 [Source:HGNC Symbol;Acc:HGNC:28689]	16.82	11.208	0.537847	0.00116247	0.0455214
ENSG00000111344	RASAL1	RAS protein activator like 1 [Source:HGNC Symbol;Acc:HGNC:9873]	0.988	0.456	1.28953	0.00118386	0.0460088
ENSG00000117834	SLC5A9	solute carrier family 5 member 9 [Source:HGNC Symbol;Acc:HGNC:22146]	0.486	0.084	2.52214	0.00119166	0.0460834
ENSG00000000003	TSPAN6	tetraspanin 6 [Source:HGNC Symbol;Acc:HGNC:11858]	12.106	6.812	0.82389	0.00120531	0.0464965
ENSG00000167702	KIFC2	kinesin family member C2 [Source:HGNC Symbol;Acc:HGNC:29530]	13.61	9.124	0.604148	0.00121193	0.0466371
ENSG00000126016	AMOT	angiomotin [Source:HGNC Symbol;Acc:HGNC:17810]	5.912	3.512	0.792096	0.00122659	0.0467418
ENSG00000171298	GAA	glucosidase alpha, acid [Source:HGNC Symbol;Acc:HGNC:4065]	42.804	30.058	0.576451	0.00123794	0.0469459
ENSG00000188488	SERPINA5	serpin family A member 5 [Source:HGNC Symbol;Acc:HGNC:8723]	85.958	32.03	1.84748	0.00124744	0.047161
ENSG00000204282	TNRC6C-AS1	TNRC6C antisense RNA 1 [Source:HGNC Symbol;Acc:HGNC:44360]	1.322	0.486	1.47645	0.00124964	0.047161
ENSG00000072694	FCGR2B	Fc fragment of IgG receptor IIb [Source:HGNC Symbol;Acc:HGNC:3618]	4.006	1.04	1.78101	0.00126084	0.0473793
ENSG00000129521	EGLN3	egl-9 family hypoxia inducible factor 3 [Source:HGNC Symbol;Acc:HGNC:14661]	7.366	2.658	1.39504	0.00128175	0.0476604
ENSG00000188060	RAB42	RAB42, member RAS oncogene family [Source:HGNC Symbol;Acc:HGNC:28702]	2.314	1.234	0.921787	0.00128107	0.0476604
ENSG00000119711	ALDH6A1	aldehyde dehydrogenase 6 family member A1 [Source:HGNC Symbol;Acc:HGNC:7179]	4.728	2.89	0.773473	0.00128417	0.0476604
ENSG00000143630	HCN3	hyperpolarization activated cyclic nucleotide gated potassium channel 3 [Source:HGNC Symbol;Acc:HGNC:19183]	5.262	2.94	0.720843	0.00128369	0.0476604
ENSG00000110455	ACCS	1-aminocyclopropane-1-carboxylate synthase homolog (inactive) [Source:HGNC Symbol;Acc:HGNC:23989]	10.306	7.38	0.595012	0.00129738	0.0480367
ENSG00000172817	CYP7B1	cytochrome P450 family 7 subfamily B member 1 [Source:HGNC Symbol;Acc:HGNC:2652]	3.008	1.954	0.869022	0.00130248	0.048112
ENSG00000124467	PSG8	pregnancy specific beta-1-glycoprotein 8 [Source:HGNC Symbol;Acc:HGNC:9525]	1.274	0.158	2.4676	0.00130735	0.0481781
ENSG00000177675	CD163L1	CD163 molecule like 1 [Source:HGNC Symbol;Acc:HGNC:30375]	1.57	0.624	2.20386	0.00133975	0.0491271
ENSG00000135916	ITM2C	integral membrane protein 2C [Source:HGNC Symbol;Acc:HGNC:6175]	102.61	72.64	0.574554	0.00134251	0.0491271
ENSG00000240583	AQP1	aquaporin 1 (Colton blood group) [Source:HGNC Symbol;Acc:HGNC:633]	68.508	19.528	1.85417	0.00134989	0.0492818
ENSG00000077063	CTTNBP2	cortactin binding protein 2 [Source:HGNC Symbol;Acc:HGNC:15679]	3.728	2.334	0.57761	0.0013537	0.0493062
ENSG00000111110	PPM1H	protein phosphatase, Mg2+/Mn2+ dependent 1H [Source:HGNC Symbol;Acc:HGNC:18583]	10.568	7.16	0.556032	0.00136186	0.0494882
ENSG00000109205	ODAM	odontogenic, ameloblast associated [Source:HGNC Symbol;Acc:HGNC:26043]	2.056	0.734	1.68205	0.00137507	0.0496189
ENSG00000187867	PALM3	paralemmin 3 [Source:HGNC Symbol;Acc:HGNC:33274]	9.14	3.252	1.40617	0.00137718	0.0496189
ENSG00000175538	KCNE3	potassium voltage-gated channel subfamily E regulatory subunit 3 [Source:HGNC Symbol;Acc:HGNC:6243]	4.078	2.236	1.2542	0.00138391	0.0496189
Downregulated
Gene	Gene.name	Gene.description	mean_Improvers_Cultured	mean_Improvers_Basal	logFC	P.Value	adj.P.Val
ENSG00000058085	LAMC2	laminin subunit gamma 2 [Source:HGNC Symbol;Acc:HGNC:6493]	36.978	98.028	-1.48528	2.37475e-06	0.0124368
ENSG00000002079	MYH16	myosin heavy chain 16 pseudogene [Source:HGNC Symbol;Acc:HGNC:31038]	0.632	2.38	-2.14005	4.44826e-06	0.0139337
ENSG00000178726	THBD	thrombomodulin [Source:HGNC Symbol;Acc:HGNC:11784]	7.37	13.362	-0.884155	1.60714e-05	0.0144994
ENSG00000112769	LAMA4	laminin subunit alpha 4 [Source:HGNC Symbol;Acc:HGNC:6484]	10.19	19.716	-0.97807	2.3475e-05	0.0144994
ENSG00000132688	NES	nestin [Source:HGNC Symbol;Acc:HGNC:7756]	4.912	9.356	-0.987741	2.73823e-05	0.0144994
ENSG00000198805	PNP	purine nucleoside phosphorylase [Source:HGNC Symbol;Acc:HGNC:7892]	40.46	74.752	-1.00502	3.62289e-05	0.0144994
ENSG00000134531	EMP1	epithelial membrane protein 1 [Source:HGNC Symbol;Acc:HGNC:3333]	25.602	56.46	-1.13833	9.79276e-06	0.0144994
ENSG00000064989	CALCRL	calcitonin receptor like receptor [Source:HGNC Symbol;Acc:HGNC:16709]	2.356	5.844	-1.25872	1.66365e-05	0.0144994
ENSG00000157554	ERG	ERG, ETS transcription factor [Source:HGNC Symbol;Acc:HGNC:3446]	1.584	3.54	-1.26032	4.44369e-05	0.0144994
ENSG00000118257	NRP2	neuropilin 2 [Source:HGNC Symbol;Acc:HGNC:8005]	5.376	12.908	-1.34976	3.81155e-05	0.0144994
ENSG00000123496	IL13RA2	interleukin 13 receptor subunit alpha 2 [Source:HGNC Symbol;Acc:HGNC:5975]	5.39	12.936	-1.3986	1.05647e-05	0.0144994
ENSG00000014257	ACPP	acid phosphatase, prostate [Source:HGNC Symbol;Acc:HGNC:125]	6.048	16.278	-1.40216	3.67345e-05	0.0144994
ENSG00000184557	SOCS3	suppressor of cytokine signaling 3 [Source:HGNC Symbol;Acc:HGNC:19391]	8.542	22.278	-1.42986	3.63619e-05	0.0144994
ENSG00000106366	SERPINE1	serpin family E member 1 [Source:HGNC Symbol;Acc:HGNC:8583]	26.622	69.746	-1.63723	4.34972e-05	0.0144994
ENSG00000185467	KPNA7	karyopherin subunit alpha 7 [Source:HGNC Symbol;Acc:HGNC:21839]	0.662	2.142	-1.75036	4.13962e-05	0.0144994
ENSG00000120156	TEK	TEK receptor tyrosine kinase [Source:HGNC Symbol;Acc:HGNC:11724]	0.45	1.456	-1.77589	2.71457e-05	0.0144994
ENSG00000138685	FGF2	fibroblast growth factor 2 [Source:HGNC Symbol;Acc:HGNC:3676]	3.724	13.52	-1.87886	1.55879e-05	0.0144994
ENSG00000125810	CD93	CD93 molecule [Source:HGNC Symbol;Acc:HGNC:15855]	3.522	11.984	-1.89223	4.03218e-05	0.0144994
ENSG00000127533	F2RL3	F2R like thrombin or trypsin receptor 3 [Source:HGNC Symbol;Acc:HGNC:3540]	1.706	6.384	-1.95565	1.36986e-05	0.0144994
ENSG00000128342	LIF	LIF, interleukin 6 family cytokine [Source:HGNC Symbol;Acc:HGNC:6596]	10.752	43.89	-2.25742	4.36527e-05	0.0144994
ENSG00000126353	CCR7	C-C motif chemokine receptor 7 [Source:HGNC Symbol;Acc:HGNC:1608]	0.138	0.67	-2.2985	4.27586e-05	0.0144994
ENSG00000196611	MMP1	matrix metallopeptidase 1 [Source:HGNC Symbol;Acc:HGNC:7155]	71.16	468.162	-2.84098	2.51096e-05	0.0144994
ENSG00000115602	IL1RL1	interleukin 1 receptor like 1 [Source:HGNC Symbol;Acc:HGNC:5998]	0.478	3.336	-2.9956	4.10445e-05	0.0144994
ENSG00000137558	PI15	peptidase inhibitor 15 [Source:HGNC Symbol;Acc:HGNC:8946]	0.77	8.488	-3.32953	6.26118e-06	0.0144994
ENSG00000140519	RHCG	Rh family C glycoprotein [Source:HGNC Symbol;Acc:HGNC:18140]	0.252	3.136	-3.66023	1.66373e-05	0.0144994
ENSG00000108342	CSF3	colony stimulating factor 3 [Source:HGNC Symbol;Acc:HGNC:2438]	0.192	4.44	-4.60396	3.13343e-05	0.0144994
ENSG00000131016	AKAP12	A-kinase anchoring protein 12 [Source:HGNC Symbol;Acc:HGNC:370]	11.344	19.242	-0.798073	5.2903e-05	0.0146845
ENSG00000256802	AC022613.1		3.096	7.376	-1.17524	5.45285e-05	0.0146845
ENSG00000069122	ADGRF5	adhesion G protein-coupled receptor F5 [Source:HGNC Symbol;Acc:HGNC:19030]	2.53	5.552	-1.29607	4.97929e-05	0.0146845
ENSG00000145777	TSLP	thymic stromal lymphopoietin [Source:HGNC Symbol;Acc:HGNC:30743]	0.288	1.02	-1.95761	5.26821e-05	0.0146845
ENSG00000067798	NAV3	neuron navigator 3 [Source:HGNC Symbol;Acc:HGNC:15998]	2.476	4.836	-0.995136	6.67991e-05	0.0166065
ENSG00000175592	FOSL1	FOS like 1, AP-1 transcription factor subunit [Source:HGNC Symbol;Acc:HGNC:13718]	3.152	13.738	-2.20092	6.6666e-05	0.0166065
ENSG00000125538	IL1B	interleukin 1 beta [Source:HGNC Symbol;Acc:HGNC:5992]	4.38	15.216	-1.81745	7.06577e-05	0.0170253
ENSG00000170989	S1PR1	sphingosine-1-phosphate receptor 1 [Source:HGNC Symbol;Acc:HGNC:3165]	1.822	4.116	-1.19403	7.59149e-05	0.0178699
ENSG00000176014	TUBB6	tubulin beta 6 class V [Source:HGNC Symbol;Acc:HGNC:20776]	28.078	53.56	-1.13374	8.33996e-05	0.0185456
ENSG00000178752	ERFE	erythroferrone [Source:HGNC Symbol;Acc:HGNC:26727]	2.818	7.278	-1.57694	8.19312e-05	0.0185456
ENSG00000153162	BMP6	bone morphogenetic protein 6 [Source:HGNC Symbol;Acc:HGNC:1073]	0.114	0.438	-1.89639	8.40723e-05	0.0185456
ENSG00000128016	ZFP36	ZFP36 ring finger protein [Source:HGNC Symbol;Acc:HGNC:12862]	18.69	29.482	-0.729457	8.7471e-05	0.0187667
ENSG00000137496	IL18BP	interleukin 18 binding protein [Source:HGNC Symbol;Acc:HGNC:5987]	10.478	35.87	-1.5837	9.27242e-05	0.0191745
ENSG00000175793	SFN	stratifin [Source:HGNC Symbol;Acc:HGNC:10773]	2.57	7.274	-1.60911	9.30445e-05	0.0191745
ENSG00000196230	TUBB	tubulin beta class I [Source:HGNC Symbol;Acc:HGNC:20778]	200.202	338.564	-0.860638	0.000100852	0.0198515
ENSG00000110047	EHD1	EH domain containing 1 [Source:HGNC Symbol;Acc:HGNC:3242]	10.056	19.174	-0.94105	0.00010935	0.0198515
ENSG00000127329	PTPRB	protein tyrosine phosphatase, receptor type B [Source:HGNC Symbol;Acc:HGNC:9665]	1.336	2.486	-1.03124	0.000109799	0.0198515
ENSG00000038295	TLL1	tolloid like 1 [Source:HGNC Symbol;Acc:HGNC:11843]	0.384	1.026	-1.47044	0.000110272	0.0198515
ENSG00000177464	GPR4	G protein-coupled receptor 4 [Source:HGNC Symbol;Acc:HGNC:4497]	0.874	2.792	-1.80848	0.000103852	0.0198515
ENSG00000112936	C7	complement C7 [Source:HGNC Symbol;Acc:HGNC:1346]	3.614	17.104	-2.46497	9.79257e-05	0.0198515
ENSG00000123416	TUBA1B	tubulin alpha 1b [Source:HGNC Symbol;Acc:HGNC:18809]	388.956	709.106	-0.918898	0.000115105	0.019935
ENSG00000105974	CAV1	caveolin 1 [Source:HGNC Symbol;Acc:HGNC:1527]	8.216	16.082	-1.02291	0.000127695	0.019935
ENSG00000180914	OXTR	oxytocin receptor [Source:HGNC Symbol;Acc:HGNC:8529]	0.208	0.478	-1.53693	0.000113476	0.019935
ENSG00000167748	KLK1	kallikrein 1 [Source:HGNC Symbol;Acc:HGNC:6357]	45.12	130.296	-1.59073	0.000129829	0.019935
ENSG00000019991	HGF	hepatocyte growth factor [Source:HGNC Symbol;Acc:HGNC:4893]	0.652	2.53	-1.69506	0.000120471	0.019935
ENSG00000137672	TRPC6	transient receptor potential cation channel subfamily C member 6 [Source:HGNC Symbol;Acc:HGNC:12338]	0.384	1.354	-1.9086	0.00012671	0.019935
ENSG00000136160	EDNRB	endothelin receptor type B [Source:HGNC Symbol;Acc:HGNC:3180]	2.062	8.822	-2.02876	0.000113631	0.019935
ENSG00000095752	IL11	interleukin 11 [Source:HGNC Symbol;Acc:HGNC:5966]	13.912	106.714	-3.03198	0.000117523	0.019935
ENSG00000215704	CELA2B	chymotrypsin like elastase family member 2B [Source:HGNC Symbol;Acc:HGNC:29995]	8.434	59.516	-3.04757	0.000125932	0.019935
ENSG00000162892	IL24	interleukin 24 [Source:HGNC Symbol;Acc:HGNC:11346]	7.992	64.864	-3.2069	0.000118227	0.019935
ENSG00000171223	JUNB	JunB proto-oncogene, AP-1 transcription factor subunit [Source:HGNC Symbol;Acc:HGNC:6205]	41.01	81.164	-1.09605	0.000134589	0.0200265
ENSG00000078081	LAMP3	lysosomal associated membrane protein 3 [Source:HGNC Symbol;Acc:HGNC:14582]	1.586	3.69	-1.16745	0.000134936	0.0200265
ENSG00000137440	FGFBP1	fibroblast growth factor binding protein 1 [Source:HGNC Symbol;Acc:HGNC:19695]	3.734	25.764	-3.20919	0.000135539	0.0200265
ENSG00000163638	ADAMTS9	ADAM metallopeptidase with thrombospondin type 1 motif 9 [Source:HGNC Symbol;Acc:HGNC:13202]	8.462	13.964	-1.0527	0.00013836	0.0202522
ENSG00000165916	PSMC3	proteasome 26S subunit, ATPase 3 [Source:HGNC Symbol;Acc:HGNC:9549]	126.662	189.5	-0.699385	0.000149262	0.0202788
ENSG00000172020	GAP43	growth associated protein 43 [Source:HGNC Symbol;Acc:HGNC:4140]	4.354	8.448	-1.0275	0.000154659	0.0202788
ENSG00000278709	NKILA	NF-kappaB interacting lncRNA [Source:HGNC Symbol;Acc:HGNC:51599]	1.074	2.228	-1.09664	0.000147392	0.0202788
ENSG00000124216	SNAI1	snail family transcriptional repressor 1 [Source:HGNC Symbol;Acc:HGNC:11128]	2.326	5.092	-1.11661	0.000159532	0.0202788
ENSG00000152583	SPARCL1	SPARC like 1 [Source:HGNC Symbol;Acc:HGNC:11220]	9.03	16.97	-1.15747	0.000158165	0.0202788
ENSG00000197905	TEAD4	TEA domain transcription factor 4 [Source:HGNC Symbol;Acc:HGNC:11717]	5.988	13.886	-1.21496	0.000154983	0.0202788
ENSG00000159261	CLDN14	claudin 14 [Source:HGNC Symbol;Acc:HGNC:2035]	0.852	2.768	-1.87585	0.000160553	0.0202788
ENSG00000172482	AGXT	alanine-glyoxylate aminotransferase [Source:HGNC Symbol;Acc:HGNC:341]	0.068	0.538	-3.03474	0.000154501	0.0202788
ENSG00000196754	S100A2	S100 calcium binding protein A2 [Source:HGNC Symbol;Acc:HGNC:10492]	2.324	11.08	-2.18106	0.000168889	0.020505
ENSG00000138623	SEMA7A	semaphorin 7A (John Milton Hagen blood group) [Source:HGNC Symbol;Acc:HGNC:10741]	6.928	13.984	-1.09668	0.000178543	0.0213461
ENSG00000139567	ACVRL1	activin A receptor like type 1 [Source:HGNC Symbol;Acc:HGNC:175]	3.458	6.928	-0.954637	0.000185173	0.0215932
ENSG00000148120	C9orf3	chromosome 9 open reading frame 3 [Source:HGNC Symbol;Acc:HGNC:1361]	39.608	60.3	-0.595261	0.000197483	0.0220563
ENSG00000106991	ENG	endoglin [Source:HGNC Symbol;Acc:HGNC:3349]	13.95	23.27	-0.759801	0.000194485	0.0220563
ENSG00000057657	PRDM1	PR/SET domain 1 [Source:HGNC Symbol;Acc:HGNC:9346]	1.828	3.53	-0.883121	0.000198389	0.0220563
ENSG00000071282	LMCD1	LIM and cysteine rich domains 1 [Source:HGNC Symbol;Acc:HGNC:6633]	49.632	90.258	-0.939256	0.000200401	0.0220563
ENSG00000165495	PKNOX2	PBX/knotted 1 homeobox 2 [Source:HGNC Symbol;Acc:HGNC:16714]	1.692	3.4	-1.00298	0.000206923	0.0220563
ENSG00000165379	LRFN5	leucine rich repeat and fibronectin type III domain containing 5 [Source:HGNC Symbol;Acc:HGNC:20360]	1.282	2.474	-1.01512	0.000201357	0.0220563
ENSG00000125148	MT2A	metallothionein 2A [Source:HGNC Symbol;Acc:HGNC:7406]	259.16	537.704	-1.05868	0.000199791	0.0220563
ENSG00000056558	TRAF1	TNF receptor associated factor 1 [Source:HGNC Symbol;Acc:HGNC:12031]	2.514	6.194	-1.2952	0.000208423	0.0220563
ENSG00000167553	TUBA1C	tubulin alpha 1c [Source:HGNC Symbol;Acc:HGNC:20768]	141.588	301.772	-1.38195	0.000201803	0.0220563
ENSG00000267107	PCAT19	prostate cancer associated transcript 19 (non-protein coding) [Source:HGNC Symbol;Acc:HGNC:49593]	1.53	4.488	-1.5573	0.000207117	0.0220563
ENSG00000179751	SYCN	syncollin [Source:HGNC Symbol;Acc:HGNC:18442]	24.602	125.32	-2.61398	0.000204522	0.0220563
ENSG00000068079	IFI35	interferon induced protein 35 [Source:HGNC Symbol;Acc:HGNC:5399]	22.1	32.758	-0.639138	0.000220556	0.0224308
ENSG00000188229	TUBB4B	tubulin beta 4B class IVb [Source:HGNC Symbol;Acc:HGNC:20771]	85.866	138.278	-0.718065	0.000227481	0.0225494
ENSG00000167984	NLRC3	NLR family CARD domain containing 3 [Source:HGNC Symbol;Acc:HGNC:29889]	0.158	0.406	-1.68552	0.000225806	0.0225494
ENSG00000080573	COL5A3	collagen type V alpha 3 chain [Source:HGNC Symbol;Acc:HGNC:14864]	7.6	16.912	-0.996872	0.000232014	0.0228541
ENSG00000154016	GRAP	GRB2-related adaptor protein [Source:HGNC Symbol;Acc:HGNC:4562]	1.1	3.6	-1.40211	0.00023644	0.0230008
ENSG00000114529	C3orf52	chromosome 3 open reading frame 52 [Source:HGNC Symbol;Acc:HGNC:26255]	8.034	11.71	-0.631596	0.000247933	0.0236776
ENSG00000136244	IL6	interleukin 6 [Source:HGNC Symbol;Acc:HGNC:6018]	7.672	36.9	-2.24514	0.000250703	0.0237759
ENSG00000128591	FLNC	filamin C [Source:HGNC Symbol;Acc:HGNC:3756]	0.718	1.248	-0.912644	0.000265832	0.0241188
ENSG00000158859	ADAMTS4	ADAM metallopeptidase with thrombospondin type 1 motif 4 [Source:HGNC Symbol;Acc:HGNC:220]	2.39	7.304	-1.64473	0.000266412	0.0241188
ENSG00000254647	INS	insulin [Source:HGNC Symbol;Acc:HGNC:6081]	66381.8	117323	-0.749554	0.000270826	0.0243774
ENSG00000128052	KDR	kinase insert domain receptor [Source:HGNC Symbol;Acc:HGNC:6307]	2.94	8.22	-1.706	0.000273826	0.0245066
ENSG00000136997	MYC	MYC proto-oncogene, bHLH transcription factor [Source:HGNC Symbol;Acc:HGNC:7553]	11.618	23.464	-1.07285	0.000301291	0.0255978
ENSG00000134954	ETS1	ETS proto-oncogene 1, transcription factor [Source:HGNC Symbol;Acc:HGNC:3488]	33.22	52.668	-0.737403	0.000305189	0.0256982
ENSG00000248187	AC078850.1		0.444	4.546	-3.02297	0.000308061	0.0258013
ENSG00000184588	PDE4B	phosphodiesterase 4B [Source:HGNC Symbol;Acc:HGNC:8781]	4.234	6.684	-0.637986	0.000337201	0.0269451
ENSG00000112033	PPARD	peroxisome proliferator activated receptor delta [Source:HGNC Symbol;Acc:HGNC:9235]	10.24	16.41	-0.748492	0.000335773	0.0269451
ENSG00000079215	SLC1A3	solute carrier family 1 member 3 [Source:HGNC Symbol;Acc:HGNC:10941]	0.616	1.216	-1.15243	0.000333314	0.0269451
ENSG00000240602	AADACP1	arylacetamide deacetylase pseudogene 1 [Source:HGNC Symbol;Acc:HGNC:50305]	0.504	2.284	-2.65099	0.000350129	0.0271471
ENSG00000143546	S100A8	S100 calcium binding protein A8 [Source:HGNC Symbol;Acc:HGNC:10498]	4.232	19.854	-2.36794	0.000365896	0.0279545
ENSG00000123689	G0S2	G0/G1 switch 2 [Source:HGNC Symbol;Acc:HGNC:30229]	5.718	13.336	-1.17891	0.000385187	0.0287604
ENSG00000115590	IL1R2	interleukin 1 receptor type 2 [Source:HGNC Symbol;Acc:HGNC:5994]	1.458	3.634	-1.21703	0.000385626	0.0287604
ENSG00000131459	GFPT2	glutamine-fructose-6-phosphate transaminase 2 [Source:HGNC Symbol;Acc:HGNC:4242]	2.774	6.528	-1.20826	0.0003896	0.0289191
ENSG00000136261	BZW2	basic leucine zipper and W2 domains 2 [Source:HGNC Symbol;Acc:HGNC:18808]	20.022	31.142	-0.689628	0.000411062	0.029456
ENSG00000160180	TFF3	trefoil factor 3 [Source:HGNC Symbol;Acc:HGNC:11757]	16.074	28.188	-0.851968	0.000418854	0.029456
ENSG00000113070	HBEGF	heparin binding EGF like growth factor [Source:HGNC Symbol;Acc:HGNC:3059]	2.844	5.478	-1.00722	0.000422946	0.029456
ENSG00000035403	VCL	vinculin [Source:HGNC Symbol;Acc:HGNC:12665]	24.472	35.12	-0.590429	0.000426284	0.0295418
ENSG00000179044	EXOC3L1	exocyst complex component 3 like 1 [Source:HGNC Symbol;Acc:HGNC:27540]	0.506	1.122	-1.30148	0.000433357	0.0296703
ENSG00000179772	FOXS1	forkhead box S1 [Source:HGNC Symbol;Acc:HGNC:3735]	0.94	2.624	-1.46972	0.000448259	0.0302613
ENSG00000204539	CDSN	corneodesmosin [Source:HGNC Symbol;Acc:HGNC:1802]	0.11	1.022	-3.35605	0.000455687	0.0306308
ENSG00000119919	NKX2-3	NK2 homeobox 3 [Source:HGNC Symbol;Acc:HGNC:7836]	0.62	1.942	-1.72398	0.00045843	0.0306835
ENSG00000122863	CHST3	carbohydrate sulfotransferase 3 [Source:HGNC Symbol;Acc:HGNC:1971]	2.008	2.888	-0.60812	0.00046106	0.0307282
ENSG00000237423	LINC01522	long intergenic non-protein coding RNA 1522 [Source:HGNC Symbol;Acc:HGNC:51224]	2.846	7.702	-1.36964	0.000471755	0.0311757
ENSG00000019549	SNAI2	snail family transcriptional repressor 2 [Source:HGNC Symbol;Acc:HGNC:11094]	5.008	8.492	-0.76426	0.000480833	0.0313249
ENSG00000103241	FOXF1	forkhead box F1 [Source:HGNC Symbol;Acc:HGNC:3809]	0.898	1.952	-1.14446	0.00047812	0.0313249
ENSG00000007908	SELE	selectin E [Source:HGNC Symbol;Acc:HGNC:10718]	0.102	0.468	-2.74049	0.000484015	0.0313249
ENSG00000100906	NFKBIA	NFKB inhibitor alpha [Source:HGNC Symbol;Acc:HGNC:7797]	52.748	112.446	-1.17015	0.000489311	0.0315374
ENSG00000283632	EXOC3L2	exocyst complex component 3 like 2 [Source:HGNC Symbol;Acc:HGNC:30162]	0.448	1.238	-1.48463	0.000500253	0.0318494
ENSG00000066056	TIE1	tyrosine kinase with immunoglobulin like and EGF like domains 1 [Source:HGNC Symbol;Acc:HGNC:11809]	1.36	2.954	-1.45992	0.000502815	0.0318829
ENSG00000056736	IL17RB	interleukin 17 receptor B [Source:HGNC Symbol;Acc:HGNC:18015]	10.112	18.828	-0.909399	0.000507135	0.0319578
ENSG00000162618	ADGRL4	adhesion G protein-coupled receptor L4 [Source:HGNC Symbol;Acc:HGNC:20822]	2.206	4.92	-1.22439	0.000508076	0.0319578
ENSG00000253669	GASAL1	growth arrest associated lncRNA 1 [Source:HGNC Symbol;Acc:HGNC:53461]	0.964	2.444	-1.2456	0.000527788	0.0326728
ENSG00000144655	CSRNP1	cysteine and serine rich nuclear protein 1 [Source:HGNC Symbol;Acc:HGNC:14300]	12.202	17.568	-0.577469	0.000536478	0.0328216
ENSG00000163938	GNL3	G protein nucleolar 3 [Source:HGNC Symbol;Acc:HGNC:29931]	70.156	104.696	-0.576976	0.000542344	0.0330513
ENSG00000074842	MYDGF	myeloid derived growth factor [Source:HGNC Symbol;Acc:HGNC:16948]	63.138	88.7	-0.519131	0.000563803	0.033259
ENSG00000164687	FABP5	fatty acid binding protein 5 [Source:HGNC Symbol;Acc:HGNC:3560]	79.38	115.142	-0.565607	0.000550134	0.033259
ENSG00000161638	ITGA5	integrin subunit alpha 5 [Source:HGNC Symbol;Acc:HGNC:6141]	19.25	28.29	-0.693739	0.000554229	0.033259
ENSG00000050555	LAMC3	laminin subunit gamma 3 [Source:HGNC Symbol;Acc:HGNC:6494]	3.854	6.776	-0.702615	0.000549359	0.033259
ENSG00000168734	PKIG	cAMP-dependent protein kinase inhibitor gamma [Source:HGNC Symbol;Acc:HGNC:9019]	26.834	45.498	-0.830933	0.000566473	0.033259
ENSG00000116852	KIF21B	kinesin family member 21B [Source:HGNC Symbol;Acc:HGNC:29442]	0.558	0.92	-0.762	0.000572956	0.0333629
ENSG00000133561	GIMAP6	GTPase, IMAP family member 6 [Source:HGNC Symbol;Acc:HGNC:21918]	1.072	2.182	-0.965301	0.00058308	0.0336976
ENSG00000143127	ITGA10	integrin subunit alpha 10 [Source:HGNC Symbol;Acc:HGNC:6135]	0.782	2.424	-1.55929	0.000585275	0.0336976
ENSG00000134321	RSAD2	radical S-adenosyl methionine domain containing 2 [Source:HGNC Symbol;Acc:HGNC:30908]	5.514	8.49	-0.812066	0.000593672	0.0338112
ENSG00000187479	C11orf96	chromosome 11 open reading frame 96 [Source:HGNC Symbol;Acc:HGNC:38675]	5.762	11.18	-0.960892	0.000601842	0.0341523
ENSG00000143333	RGS16	regulator of G protein signaling 16 [Source:HGNC Symbol;Acc:HGNC:9997]	10.26	15.672	-0.605938	0.000606316	0.0341587
ENSG00000159167	STC1	stanniocalcin 1 [Source:HGNC Symbol;Acc:HGNC:11373]	10.976	24.74	-1.19894	0.000613532	0.0344386
ENSG00000131634	TMEM204	transmembrane protein 204 [Source:HGNC Symbol;Acc:HGNC:14158]	1.982	3.408	-0.848729	0.000625132	0.0346333
ENSG00000122852	SFTPA1	surfactant protein A1 [Source:HGNC Symbol;Acc:HGNC:10798]	5.438	10.04	-0.68258	0.000636385	0.0349474
ENSG00000105825	TFPI2	tissue factor pathway inhibitor 2 [Source:HGNC Symbol;Acc:HGNC:11761]	74.638	259.434	-1.39566	0.000679726	0.0367099
ENSG00000184178	SCFD2	sec1 family domain containing 2 [Source:HGNC Symbol;Acc:HGNC:30676]	4.88	7.994	-0.69052	0.000684789	0.036822
ENSG00000135454	B4GALNT1	beta-1,4-N-acetyl-galactosaminyltransferase 1 [Source:HGNC Symbol;Acc:HGNC:4117]	1.278	2.214	-0.930607	0.000692924	0.0370395
ENSG00000118503	TNFAIP3	TNF alpha induced protein 3 [Source:HGNC Symbol;Acc:HGNC:11896]	15.588	24.264	-0.689434	0.000704057	0.0372221
ENSG00000175906	ARL4D	ADP ribosylation factor like GTPase 4D [Source:HGNC Symbol;Acc:HGNC:656]	3.966	8.376	-1.0167	0.000702734	0.0372221
ENSG00000102760	RGCC	regulator of cell cycle [Source:HGNC Symbol;Acc:HGNC:20369]	4.648	9.586	-1.11186	0.000706727	0.0372221
ENSG00000214706	IFRD2	interferon related developmental regulator 2 [Source:HGNC Symbol;Acc:HGNC:5457]	15.82	22.752	-0.613759	0.000713005	0.0372236
ENSG00000100911	PSME2	proteasome activator subunit 2 [Source:HGNC Symbol;Acc:HGNC:9569]	141.38	229.628	-0.605802	0.000732768	0.0378766
ENSG00000111145	ELK3	ELK3, ETS transcription factor [Source:HGNC Symbol;Acc:HGNC:3325]	9.652	17.786	-1.06454	0.000737905	0.0380167
ENSG00000176473	WDR25	WD repeat domain 25 [Source:HGNC Symbol;Acc:HGNC:21064]	9.79	17.86	-0.898166	0.000755739	0.0385793
ENSG00000134817	APLNR	apelin receptor [Source:HGNC Symbol;Acc:HGNC:339]	0.234	1.128	-2.66331	0.000808188	0.0401425
ENSG00000067182	TNFRSF1A	TNF receptor superfamily member 1A [Source:HGNC Symbol;Acc:HGNC:11916]	65.47	95.686	-0.514837	0.000823278	0.0402943
ENSG00000138166	DUSP5	dual specificity phosphatase 5 [Source:HGNC Symbol;Acc:HGNC:3071]	13.496	19.72	-0.570647	0.000838652	0.0403923
ENSG00000128567	PODXL	podocalyxin like [Source:HGNC Symbol;Acc:HGNC:9171]	8.006	14.622	-0.85404	0.00083892	0.0403923
ENSG00000156463	SH3RF2	SH3 domain containing ring finger 2 [Source:HGNC Symbol;Acc:HGNC:26299]	1.69	3.074	-0.889032	0.000831067	0.0403923
ENSG00000053747	LAMA3	laminin subunit alpha 3 [Source:HGNC Symbol;Acc:HGNC:6483]	5.874	10.466	-0.911556	0.000843333	0.0403923
ENSG00000177337	DLGAP1-AS1	DLGAP1 antisense RNA 1 [Source:HGNC Symbol;Acc:HGNC:31676]	3.362	6.272	-0.876863	0.000847991	0.0404594
ENSG00000137309	HMGA1	high mobility group AT-hook 1 [Source:HGNC Symbol;Acc:HGNC:5010]	28.13	58.62	-1.07199	0.000849901	0.0404594
ENSG00000167703	SLC43A2	solute carrier family 43 member 2 [Source:HGNC Symbol;Acc:HGNC:23087]	22.526	43.168	-0.981497	0.000855224	0.0405549
ENSG00000166558	SLC38A8	solute carrier family 38 member 8 [Source:HGNC Symbol;Acc:HGNC:32434]	3.33	8.268	-1.44317	0.000859674	0.0405549
ENSG00000108688	CCL7	C-C motif chemokine ligand 7 [Source:HGNC Symbol;Acc:HGNC:10634]	0.802	2.418	-1.8953	0.000857159	0.0405549
ENSG00000168496	FEN1	flap structure-specific endonuclease 1 [Source:HGNC Symbol;Acc:HGNC:3650]	9.134	13.442	-0.60042	0.000868878	0.0407436
ENSG00000148841	ITPRIP	inositol 1,4,5-trisphosphate receptor interacting protein [Source:HGNC Symbol;Acc:HGNC:29370]	3.61	5.646	-0.702548	0.00086806	0.0407436
ENSG00000104856	RELB	RELB proto-oncogene, NF-kB subunit [Source:HGNC Symbol;Acc:HGNC:9956]	5.854	9.45	-0.791383	0.000877672	0.0408071
ENSG00000006327	TNFRSF12A	TNF receptor superfamily member 12A [Source:HGNC Symbol;Acc:HGNC:18152]	83.246	140.85	-0.947316	0.000887767	0.0408071
ENSG00000120279	MYCT1	MYC target 1 [Source:HGNC Symbol;Acc:HGNC:23172]	0.8	1.684	-1.09776	0.000891075	0.0408071
ENSG00000130300	PLVAP	plasmalemma vesicle associated protein [Source:HGNC Symbol;Acc:HGNC:13635]	24.274	58.068	-1.43308	0.000884283	0.0408071
ENSG00000231651	DLG3-AS1	DLG3 antisense RNA 1 [Source:HGNC Symbol;Acc:HGNC:40182]	1.128	4.118	-1.8657	0.000878388	0.0408071
ENSG00000137033	IL33	interleukin 33 [Source:HGNC Symbol;Acc:HGNC:16028]	2.422	12.206	-2.24445	0.000889883	0.0408071
ENSG00000185989	RASA3	RAS p21 protein activator 3 [Source:HGNC Symbol;Acc:HGNC:20331]	2.874	4.558	-0.666735	0.000930645	0.0422486
ENSG00000073712	FERMT2	fermitin family member 2 [Source:HGNC Symbol;Acc:HGNC:15767]	16.048	22.236	-0.526805	0.00096091	0.0424781
ENSG00000175505	CLCF1	cardiotrophin like cytokine factor 1 [Source:HGNC Symbol;Acc:HGNC:17412]	3.216	5.326	-0.738941	0.000961628	0.0424781
ENSG00000154133	ROBO4	roundabout guidance receptor 4 [Source:HGNC Symbol;Acc:HGNC:17985]	1.368	3.466	-1.37801	0.00096268	0.0424781
ENSG00000064932	SBNO2	strawberry notch homolog 2 [Source:HGNC Symbol;Acc:HGNC:29158]	10.536	14.902	-0.554078	0.000981559	0.0429418
ENSG00000157557	ETS2	ETS proto-oncogene 2, transcription factor [Source:HGNC Symbol;Acc:HGNC:3489]	24.29	37.634	-0.671872	0.000991397	0.043037
ENSG00000227038	GTF2IP7	general transcription factor IIi pseudogene 7 [Source:HGNC Symbol;Acc:HGNC:51720]	0.218	0.73	-1.17655	0.000991978	0.043037
ENSG00000240184	PCDHGC3	protocadherin gamma subfamily C, 3 [Source:HGNC Symbol;Acc:HGNC:8716]	17.388	22.214	-0.485432	0.0010255	0.0440037
ENSG00000115233	PSMD14	proteasome 26S subunit, non-ATPase 14 [Source:HGNC Symbol;Acc:HGNC:16889]	60.624	83.046	-0.501246	0.00105572	0.044337
ENSG00000068438	FTSJ1	FtsJ RNA methyltransferase homolog 1 [Source:HGNC Symbol;Acc:HGNC:13254]	15.284	21.216	-0.513445	0.00105591	0.044337
ENSG00000182752	PAPPA	pappalysin 1 [Source:HGNC Symbol;Acc:HGNC:8602]	3.754	6.034	-0.585319	0.0010535	0.044337
ENSG00000187372	PCDHB13	protocadherin beta 13 [Source:HGNC Symbol;Acc:HGNC:8684]	2.522	3.648	-0.593558	0.0010644	0.0444549
ENSG00000275896	PRSS2	serine protease 2 [Source:HGNC Symbol;Acc:HGNC:9483]	3894.38	11121.7	-1.35238	0.00107591	0.0446972
ENSG00000144063	MALL	mal, T cell differentiation protein like [Source:HGNC Symbol;Acc:HGNC:6818]	12.766	24.456	-1.23735	0.00108388	0.0448861
ENSG00000162407	PLPP3	phospholipid phosphatase 3 [Source:HGNC Symbol;Acc:HGNC:9229]	11.438	16.046	-0.560729	0.00110105	0.0449078
ENSG00000152049	KCNE4	potassium voltage-gated channel subfamily E regulatory subunit 4 [Source:HGNC Symbol;Acc:HGNC:6244]	6.472	12.882	-0.934637	0.0010962	0.0449078
ENSG00000132185	FCRLA	Fc receptor like A [Source:HGNC Symbol;Acc:HGNC:18504]	0.144	0.602	-2.1834	0.00109584	0.0449078
ENSG00000154175	ABI3BP	ABI family member 3 binding protein [Source:HGNC Symbol;Acc:HGNC:17265]	3.022	5.594	-0.894489	0.0011127	0.0452652
ENSG00000124762	CDKN1A	cyclin dependent kinase inhibitor 1A [Source:HGNC Symbol;Acc:HGNC:1784]	175.71	260.544	-0.636943	0.00111869	0.045282
ENSG00000169508	GPR183	G protein-coupled receptor 183 [Source:HGNC Symbol;Acc:HGNC:3128]	2.036	3.446	-0.772856	0.00113019	0.0453452
ENSG00000164171	ITGA2	integrin subunit alpha 2 [Source:HGNC Symbol;Acc:HGNC:6137]	27.47	48.66	-1.43954	0.00113204	0.0453452
ENSG00000287929			0.706	1.878	-1.64878	0.00114052	0.0454761
ENSG00000149633	KIAA1755	KIAA1755 [Source:HGNC Symbol;Acc:HGNC:29372]	1.496	3.492	-1.07628	0.00116259	0.0455214
ENSG00000136689	IL1RN	interleukin 1 receptor antagonist [Source:HGNC Symbol;Acc:HGNC:6000]	7.964	11.892	-0.832225	0.00117475	0.0458827
ENSG00000168268	NT5DC2	5'-nucleotidase domain containing 2 [Source:HGNC Symbol;Acc:HGNC:25717]	22.966	33.746	-0.522056	0.00118158	0.0460088
ENSG00000156140	ADAMTS3	ADAM metallopeptidase with thrombospondin type 1 motif 3 [Source:HGNC Symbol;Acc:HGNC:219]	0.15	0.47	-1.64144	0.00118953	0.0460834
ENSG00000148671	ADIRF	adipogenesis regulatory factor [Source:HGNC Symbol;Acc:HGNC:24043]	4.56	10.82	-1.56572	0.00121599	0.0466785
ENSG00000255874	LINC00346	long intergenic non-protein coding RNA 346 [Source:HGNC Symbol;Acc:HGNC:27492]	0.344	0.584	-0.80632	0.00122063	0.0467151
ENSG00000127920	GNG11	G protein subunit gamma 11 [Source:HGNC Symbol;Acc:HGNC:4403]	7.81	13.702	-0.93457	0.00122291	0.0467151
ENSG00000243480	AMY2A	amylase, alpha 2A (pancreatic) [Source:HGNC Symbol;Acc:HGNC:477]	16.18	148.482	-3.13014	0.00123016	0.0467641
ENSG00000217801	AL390719.1		5.674	11.044	-0.845895	0.00126147	0.0473793
ENSG00000037280	FLT4	fms related tyrosine kinase 4 [Source:HGNC Symbol;Acc:HGNC:3767]	0.488	0.956	-1.20701	0.00127482	0.0476604
ENSG00000112118	MCM3	minichromosome maintenance complex component 3 [Source:HGNC Symbol;Acc:HGNC:6945]	13.618	18.566	-0.508129	0.00132086	0.0485618
ENSG00000006062	MAP3K14	mitogen-activated protein kinase kinase kinase 14 [Source:HGNC Symbol;Acc:HGNC:6853]	4.35	6.184	-0.569618	0.00137977	0.0496189
ENSG00000132334	PTPRE	protein tyrosine phosphatase, receptor type E [Source:HGNC Symbol;Acc:HGNC:9669]	2.546	3.74	-0.610777	0.00138446	0.0496189
ENSG00000101311	FERMT1	fermitin family member 1 [Source:HGNC Symbol;Acc:HGNC:15889]	2.492	4.25	-0.871285	0.00138173	0.0496189
ENSG00000205502	C2CD4B	C2 calcium dependent domain containing 4B [Source:HGNC Symbol;Acc:HGNC:33628]	12.914	21.466	-0.75751	0.00139224	0.0497837

## Sheet: Not Improvers_Cult_vs_Basal
TableS3b. Genes differentially expressed (False Discovery Rate, FDR<0.05) between Non-Improvers_cultured vs Basal.
Upregulated
Gene	Gene.name	Gene.description	mean_Non-Improvers_Cultured	mean_Non-Improvers_Basal	logFC	P.Value	adj.P.Val
ENSG00000168955	TM4SF20	transmembrane 4 L six family member 20 [Source:HGNC Symbol;Acc:HGNC:26230]	1.752	0.016	6.01488	5.80682e-06	0.0188308
ENSG00000286042			24.79	3.702	2.59137	6.02894e-05	0.0188308
ENSG00000166143	PPP1R14D	protein phosphatase 1 regulatory inhibitor subunit 14D [Source:HGNC Symbol;Acc:HGNC:14953]	4.268	0.866	2.08965	2.27793e-05	0.0188308
ENSG00000253417	LINC02159	long intergenic non-protein coding RNA 2159 [Source:HGNC Symbol;Acc:HGNC:27749]	5.37	1.128	2.02016	2.5721e-05	0.0188308
ENSG00000188257	PLA2G2A	phospholipase A2 group IIA [Source:HGNC Symbol;Acc:HGNC:9031]	5.558	1.552	1.60923	6.97613e-05	0.0188308
ENSG00000141574	SECTM1	secreted and transmembrane 1 [Source:HGNC Symbol;Acc:HGNC:10707]	13.85	4.928	1.11572	6.2588e-05	0.0188308
ENSG00000064687	ABCA7	ATP binding cassette subfamily A member 7 [Source:HGNC Symbol;Acc:HGNC:37]	11.188	5.356	1.04215	9.25788e-05	0.0188308
ENSG00000105855	ITGB8	integrin subunit beta 8 [Source:HGNC Symbol;Acc:HGNC:6163]	11.326	5.436	0.946838	1.19611e-05	0.0188308
ENSG00000111912	NCOA7	nuclear receptor coactivator 7 [Source:HGNC Symbol;Acc:HGNC:21081]	88.892	45.742	0.856936	5.66994e-05	0.0188308
ENSG00000134198	TSPAN2	tetraspanin 2 [Source:HGNC Symbol;Acc:HGNC:20659]	15.936	9.144	0.838339	7.92816e-05	0.0188308
ENSG00000166348	USP54	ubiquitin specific peptidase 54 [Source:HGNC Symbol;Acc:HGNC:23513]	25.194	13.642	0.621492	8.77884e-05	0.0188308
ENSG00000204616	TRIM31	tripartite motif containing 31 [Source:HGNC Symbol;Acc:HGNC:16289]	3.846	0.296	3.34272	0.000159441	0.0188331
ENSG00000241635	UGT1A1	UDP glucuronosyltransferase family 1 member A1 [Source:HGNC Symbol;Acc:HGNC:12530]	12.912	1.208	3.18987	0.000123488	0.0188331
ENSG00000093134	VNN3	vanin 3 [Source:HGNC Symbol;Acc:HGNC:16431]	6.202	0.662	2.80075	0.000168407	0.0188331
ENSG00000171551	ECEL1	endothelin converting enzyme like 1 [Source:HGNC Symbol;Acc:HGNC:3147]	4.638	0.888	2.12056	0.000100124	0.0188331
ENSG00000070190	DAPP1	dual adaptor of phosphotyrosine and 3-phosphoinositides 1 [Source:HGNC Symbol;Acc:HGNC:16500]	3.396	0.738	1.98366	0.000149727	0.0188331
ENSG00000166959	MS4A8	membrane spanning 4-domains A8 [Source:HGNC Symbol;Acc:HGNC:13380]	6.228	1.534	1.81075	0.000127137	0.0188331
ENSG00000136404	TM6SF1	transmembrane 6 superfamily member 1 [Source:HGNC Symbol;Acc:HGNC:11860]	1.092	0.33	1.70655	0.000172497	0.0188331
ENSG00000002726	AOC1	amine oxidase, copper containing 1 [Source:HGNC Symbol;Acc:HGNC:80]	1.13	0.374	1.58217	0.000179558	0.0188331
ENSG00000047457	CP	ceruloplasmin [Source:HGNC Symbol;Acc:HGNC:2295]	121.018	28.952	1.47155	0.000143207	0.0188331
ENSG00000049089	COL9A2	collagen type IX alpha 2 chain [Source:HGNC Symbol;Acc:HGNC:2218]	6.38	2.746	1.13031	0.000161289	0.0188331
ENSG00000137462	TLR2	toll like receptor 2 [Source:HGNC Symbol;Acc:HGNC:11848]	8.394	3.79	1.00539	0.000136241	0.0188331
ENSG00000115828	QPCT	glutaminyl-peptide cyclotransferase [Source:HGNC Symbol;Acc:HGNC:9753]	147.564	76.468	0.984071	0.000106519	0.0188331
ENSG00000163393	SLC22A15	solute carrier family 22 member 15 [Source:HGNC Symbol;Acc:HGNC:20301]	3.664	1.624	0.959964	9.47607e-05	0.0188331
ENSG00000025039	RRAGD	Ras related GTP binding D [Source:HGNC Symbol;Acc:HGNC:19903]	32.238	15.884	0.866843	0.000147585	0.0188331
ENSG00000141441	GAREM1	GRB2 associated regulator of MAPK1 subtype 1 [Source:HGNC Symbol;Acc:HGNC:26136]	8.518	4.872	0.849671	0.000130278	0.0188331
ENSG00000015520	NPC1L1	NPC1 like intracellular cholesterol transporter 1 [Source:HGNC Symbol;Acc:HGNC:7898]	3.21	1.638	0.807875	0.000186342	0.0188331
ENSG00000164951	PDP1	pyruvate dehyrogenase phosphatase catalytic subunit 1 [Source:HGNC Symbol;Acc:HGNC:9279]	35.308	17.848	0.80106	0.00012037	0.0188331
ENSG00000172667	ZMAT3	zinc finger matrin-type 3 [Source:HGNC Symbol;Acc:HGNC:29983]	9.908	5.172	0.763725	0.000129489	0.0188331
ENSG00000204852	TCTN1	tectonic family member 1 [Source:HGNC Symbol;Acc:HGNC:26113]	19.722	10.964	0.762973	0.000176179	0.0188331
ENSG00000170540	ARL6IP1	ADP ribosylation factor like GTPase 6 interacting protein 1 [Source:HGNC Symbol;Acc:HGNC:697]	149.706	87.954	0.729041	0.000126515	0.0188331
ENSG00000169919	GUSB	glucuronidase beta [Source:HGNC Symbol;Acc:HGNC:4696]	40.132	21.628	0.727094	0.00017004	0.0188331
ENSG00000137103	TMEM8B	transmembrane protein 8B [Source:HGNC Symbol;Acc:HGNC:21427]	6.234	3.494	0.726919	0.000118464	0.0188331
ENSG00000132613	MTSS1L	MTSS1L, I-BAR domain containing [Source:HGNC Symbol;Acc:HGNC:25094]	24.93	12.798	0.689007	0.000172232	0.0188331
ENSG00000088899	LZTS3	leucine zipper tumor suppressor family member 3 [Source:HGNC Symbol;Acc:HGNC:30139]	8.884	5.26	0.575744	0.000155542	0.0188331
ENSG00000100077	GRK3	G protein-coupled receptor kinase 3 [Source:HGNC Symbol;Acc:HGNC:290]	11.15	7.186	0.570206	0.000143379	0.0188331
ENSG00000137414	FAM8A1	family with sequence similarity 8 member A1 [Source:HGNC Symbol;Acc:HGNC:16372]	12.078	7.3	0.559123	0.000166333	0.0188331
ENSG00000112796	ENPP5	ectonucleotide pyrophosphatase/phosphodiesterase 5 (putative) [Source:HGNC Symbol;Acc:HGNC:13717]	21.068	10.26	0.919977	0.000193053	0.0189512
ENSG00000113924	HGD	homogentisate 1,2-dioxygenase [Source:HGNC Symbol;Acc:HGNC:4892]	45.882	17.87	1.2968	0.000197782	0.0190041
ENSG00000175414	ARL10	ADP ribosylation factor like GTPase 10 [Source:HGNC Symbol;Acc:HGNC:22042]	2.9	1.27	1.06782	0.000209814	0.019068
ENSG00000174080	CTSF	cathepsin F [Source:HGNC Symbol;Acc:HGNC:2531]	18.408	6.56	1.38004	0.00021359	0.0191253
ENSG00000197635	DPP4	dipeptidyl peptidase 4 [Source:HGNC Symbol;Acc:HGNC:3009]	9.914	5.452	0.747013	0.000217577	0.0191443
ENSG00000115009	CCL20	C-C motif chemokine ligand 20 [Source:HGNC Symbol;Acc:HGNC:10619]	780.426	18.708	4.64442	0.000225601	0.0195213
ENSG00000170266	GLB1	galactosidase beta 1 [Source:HGNC Symbol;Acc:HGNC:4298]	71.378	40.08	0.716188	0.000228114	0.0196214
ENSG00000112378	PERP	PERP, TP53 apoptosis effector [Source:HGNC Symbol;Acc:HGNC:17637]	81.692	44.392	0.695499	0.000243298	0.0200554
ENSG00000119943	PYROXD2	pyridine nucleotide-disulphide oxidoreductase domain 2 [Source:HGNC Symbol;Acc:HGNC:23517]	5.824	2.716	1.10382	0.00026732	0.0214706
ENSG00000224769	MUC20P1	mucin 20, cell surface associated pseudogene 1 [Source:HGNC Symbol;Acc:HGNC:51921]	11.034	2.578	1.87533	0.000269497	0.021535
ENSG00000166396	SERPINB7	serpin family B member 7 [Source:HGNC Symbol;Acc:HGNC:13902]	314.616	9.182	4.24532	0.000271327	0.0215712
ENSG00000235899	LINC01564	long intergenic non-protein coding RNA 1564 [Source:HGNC Symbol;Acc:HGNC:51361]	4.892	0.78	2.25822	0.000276841	0.0215716
ENSG00000198919	DZIP3	DAZ interacting zinc finger protein 3 [Source:HGNC Symbol;Acc:HGNC:30938]	15.446	8.884	0.770732	0.00027624	0.0215716
ENSG00000196391	ZNF774	zinc finger protein 774 [Source:HGNC Symbol;Acc:HGNC:33108]	4.54	1.972	0.899155	0.000285553	0.0218162
ENSG00000171431	KRT20	keratin 20 [Source:HGNC Symbol;Acc:HGNC:20412]	3.774	0.1	5.14297	0.000345898	0.0222232
ENSG00000213886	UBD	ubiquitin D [Source:HGNC Symbol;Acc:HGNC:18795]	991.456	260.654	2.77126	0.000324439	0.0222232
ENSG00000101443	WFDC2	WAP four-disulfide core domain 2 [Source:HGNC Symbol;Acc:HGNC:15939]	147.788	21.106	2.37376	0.000342715	0.0222232
ENSG00000169860	P2RY1	purinergic receptor P2Y1 [Source:HGNC Symbol;Acc:HGNC:8539]	3.958	1.366	1.35019	0.000346639	0.0222232
ENSG00000106258	CYP3A5	cytochrome P450 family 3 subfamily A member 5 [Source:HGNC Symbol;Acc:HGNC:2638]	99.876	38.068	1.32393	0.000342177	0.0222232
ENSG00000160781	PAQR6	progestin and adipoQ receptor family member 6 [Source:HGNC Symbol;Acc:HGNC:30132]	1.454	0.63	1.02283	0.000323797	0.0222232
ENSG00000106460	TMEM106B	transmembrane protein 106B [Source:HGNC Symbol;Acc:HGNC:22407]	73.226	40.494	0.862596	0.000305912	0.0222232
ENSG00000005893	LAMP2	lysosomal associated membrane protein 2 [Source:HGNC Symbol;Acc:HGNC:6501]	164.144	87.814	0.637083	0.000312292	0.0222232
ENSG00000114166	KAT2B	lysine acetyltransferase 2B [Source:HGNC Symbol;Acc:HGNC:8638]	14.408	8.374	0.617457	0.000338421	0.0222232
ENSG00000129636	ITFG1	integrin alpha FG-GAP repeat containing 1 [Source:HGNC Symbol;Acc:HGNC:30697]	77.16	46.202	0.589332	0.000321457	0.0222232
ENSG00000074696	HACD3	3-hydroxyacyl-CoA dehydratase 3 [Source:HGNC Symbol;Acc:HGNC:24175]	53.106	32.496	0.52995	0.000318625	0.0222232
ENSG00000173702	MUC13	mucin 13, cell surface associated [Source:HGNC Symbol;Acc:HGNC:7511]	248.1	79.56	1.85906	0.000367818	0.0224806
ENSG00000173805	HAP1	huntingtin associated protein 1 [Source:HGNC Symbol;Acc:HGNC:4812]	5.004	1.536	1.64439	0.000367093	0.0224806
ENSG00000071553	ATP6AP1	ATPase H+ transporting accessory protein 1 [Source:HGNC Symbol;Acc:HGNC:868]	101.722	58.888	0.654463	0.000358102	0.0224806
ENSG00000187231	SESTD1	SEC14 and spectrin domain containing 1 [Source:HGNC Symbol;Acc:HGNC:18379]	41.776	31.404	0.564597	0.000361935	0.0224806
ENSG00000158022	TRIM63	tripartite motif containing 63 [Source:HGNC Symbol;Acc:HGNC:16007]	2.342	0.428	2.66351	0.000393095	0.0229846
ENSG00000138604	GLCE	glucuronic acid epimerase [Source:HGNC Symbol;Acc:HGNC:17855]	10.468	6.984	0.540151	0.000393301	0.0229846
ENSG00000105928	GSDME	gasdermin E [Source:HGNC Symbol;Acc:HGNC:2810]	6.458	3.084	0.843302	0.000396483	0.0229989
ENSG00000128266	GNAZ	G protein subunit alpha z [Source:HGNC Symbol;Acc:HGNC:4395]	8.906	5.284	0.617347	0.000395321	0.0229989
ENSG00000149177	PTPRJ	protein tyrosine phosphatase, receptor type J [Source:HGNC Symbol;Acc:HGNC:9673]	11.854	7.432	0.507916	0.000402599	0.0230391
ENSG00000171298	GAA	glucosidase alpha, acid [Source:HGNC Symbol;Acc:HGNC:4065]	46.194	24.972	0.94619	0.000411002	0.0230826
ENSG00000019186	CYP24A1	cytochrome P450 family 24 subfamily A member 1 [Source:HGNC Symbol;Acc:HGNC:2602]	3.128	0.434	2.5773	0.000426086	0.0231514
ENSG00000261578	AP003119.3		0.77	0.296	1.2482	0.00042711	0.0231514
ENSG00000116005	PCYOX1	prenylcysteine oxidase 1 [Source:HGNC Symbol;Acc:HGNC:20588]	24.806	12.86	0.90214	0.00042046	0.0231514
ENSG00000152409	JMY	junction mediating and regulatory protein, p53 cofactor [Source:HGNC Symbol;Acc:HGNC:28916]	5.04	2.982	0.651304	0.000427196	0.0231514
ENSG00000248905	FMN1	formin 1 [Source:HGNC Symbol;Acc:HGNC:3768]	2.568	1.714	0.610114	0.000425812	0.0231514
ENSG00000138459	SLC35A5	solute carrier family 35 member A5 [Source:HGNC Symbol;Acc:HGNC:20792]	29.106	18.094	0.525637	0.000420458	0.0231514
ENSG00000108602	ALDH3A1	aldehyde dehydrogenase 3 family member A1 [Source:HGNC Symbol;Acc:HGNC:405]	8.72	2.068	2.02959	0.000435426	0.0234414
ENSG00000090382	LYZ	lysozyme [Source:HGNC Symbol;Acc:HGNC:6740]	457.226	174.41	2.40093	0.000441593	0.0234449
ENSG00000152229	PSTPIP2	proline-serine-threonine phosphatase interacting protein 2 [Source:HGNC Symbol;Acc:HGNC:9581]	9.838	3.034	1.49814	0.000440287	0.0234449
ENSG00000184731	FAM110C	family with sequence similarity 110 member C [Source:HGNC Symbol;Acc:HGNC:33340]	11.282	7.028	0.593635	0.000445818	0.0234488
ENSG00000166340	TPP1	tripeptidyl peptidase 1 [Source:HGNC Symbol;Acc:HGNC:2073]	79.818	39.026	0.976711	0.00045564	0.0237084
ENSG00000167165	UGT1A6	UDP glucuronosyltransferase family 1 member A6 [Source:HGNC Symbol;Acc:HGNC:12538]	40.06	8.074	2.12222	0.000476481	0.023805
ENSG00000005108	THSD7A	thrombospondin type 1 domain containing 7A [Source:HGNC Symbol;Acc:HGNC:22207]	2.656	0.638	1.71379	0.000483908	0.023805
ENSG00000122711	SPINK4	serine peptidase inhibitor, Kazal type 4 [Source:HGNC Symbol;Acc:HGNC:16646]	17.304	4.17	1.58919	0.000498359	0.023805
ENSG00000163071	SPATA18	spermatogenesis associated 18 [Source:HGNC Symbol;Acc:HGNC:29579]	4.76	2.294	0.968303	0.000466166	0.023805
ENSG00000213614	HEXA	hexosaminidase subunit alpha [Source:HGNC Symbol;Acc:HGNC:4878]	125.88	66.836	0.865969	0.00049781	0.023805
ENSG00000138764	CCNG2	cyclin G2 [Source:HGNC Symbol;Acc:HGNC:1593]	31.682	17.37	0.795159	0.000477119	0.023805
ENSG00000182220	ATP6AP2	ATPase H+ transporting accessory protein 2 [Source:HGNC Symbol;Acc:HGNC:18305]	125.958	90.986	0.469871	0.00049084	0.023805
ENSG00000253686	LINC01484	long intergenic non-protein coding RNA 1484 [Source:HGNC Symbol;Acc:HGNC:51136]	0.652	0.16	1.70876	0.000502653	0.0238104
ENSG00000108244	KRT23	keratin 23 [Source:HGNC Symbol;Acc:HGNC:6438]	111.128	42.784	1.18802	0.000525271	0.0243698
ENSG00000156171	DRAM2	DNA damage regulated autophagy modulator 2 [Source:HGNC Symbol;Acc:HGNC:28769]	47.454	28.504	0.572505	0.000527479	0.0243698
ENSG00000136161	RCBTB2	RCC1 and BTB domain containing protein 2 [Source:HGNC Symbol;Acc:HGNC:1914]	5.206	3.192	0.74884	0.000538063	0.0245008
ENSG00000104324	CPQ	carboxypeptidase Q [Source:HGNC Symbol;Acc:HGNC:16910]	38.424	18.262	0.930095	0.000566139	0.0254084
ENSG00000117834	SLC5A9	solute carrier family 5 member 9 [Source:HGNC Symbol;Acc:HGNC:22146]	0.604	0.116	2.15486	0.000570543	0.025531
ENSG00000119922	IFIT2	interferon induced protein with tetratricopeptide repeats 2 [Source:HGNC Symbol;Acc:HGNC:5409]	13.578	5.73	1.02889	0.000583793	0.0257215
ENSG00000099219	ERMP1	endoplasmic reticulum metallopeptidase 1 [Source:HGNC Symbol;Acc:HGNC:23703]	11.768	5.196	0.963435	0.000583709	0.0257215
ENSG00000135916	ITM2C	integral membrane protein 2C [Source:HGNC Symbol;Acc:HGNC:6175]	92.802	45.918	0.946678	0.000584613	0.0257215
ENSG00000171714	ANO5	anoctamin 5 [Source:HGNC Symbol;Acc:HGNC:27337]	3.656	1.924	0.730209	0.000587829	0.0257215
ENSG00000145113	MUC4	mucin 4, cell surface associated [Source:HGNC Symbol;Acc:HGNC:7514]	0.814	0.25	1.81342	0.000609942	0.0260841
ENSG00000137145	DENND4C	DENN domain containing 4C [Source:HGNC Symbol;Acc:HGNC:26079]	21.59	13.482	0.506208	0.000616212	0.0260841
ENSG00000057149	SERPINB3	serpin family B member 3 [Source:HGNC Symbol;Acc:HGNC:10569]	31.594	0.868	4.37615	0.000632572	0.02612
ENSG00000198758	EPS8L3	EPS8 like 3 [Source:HGNC Symbol;Acc:HGNC:21297]	12.664	1.924	2.40713	0.000629209	0.02612
ENSG00000176945	MUC20	mucin 20, cell surface associated [Source:HGNC Symbol;Acc:HGNC:23282]	105.368	18.842	2.39247	0.000640223	0.02612
ENSG00000083290	ULK2	unc-51 like autophagy activating kinase 2 [Source:HGNC Symbol;Acc:HGNC:13480]	5.698	3.678	0.576373	0.000642077	0.02612
ENSG00000117280	RAB29	RAB29, member RAS oncogene family [Source:HGNC Symbol;Acc:HGNC:9789]	23.068	13.364	0.675449	0.000646639	0.0262374
ENSG00000188175	HEPACAM2	HEPACAM family member 2 [Source:HGNC Symbol;Acc:HGNC:27364]	26.344	9.166	1.35536	0.000653227	0.0263233
ENSG00000107537	PHYH	phytanoyl-CoA 2-hydroxylase [Source:HGNC Symbol;Acc:HGNC:8940]	29.256	13.476	0.959321	0.000653796	0.0263233
ENSG00000138769	CDKL2	cyclin dependent kinase like 2 [Source:HGNC Symbol;Acc:HGNC:1782]	1.064	0.382	1.22108	0.000660369	0.0264519
ENSG00000128872	TMOD2	tropomodulin 2 [Source:HGNC Symbol;Acc:HGNC:11872]	5.986	3.612	0.609229	0.000668268	0.0266975
ENSG00000140832	MARVELD3	MARVEL domain containing 3 [Source:HGNC Symbol;Acc:HGNC:30525]	15.408	10.24	0.476026	0.00066991	0.0266975
ENSG00000185950	IRS2	insulin receptor substrate 2 [Source:HGNC Symbol;Acc:HGNC:6126]	6.132	3.264	0.745805	0.000687555	0.0267189
ENSG00000135677	GNS	glucosamine (N-acetyl)-6-sulfatase [Source:HGNC Symbol;Acc:HGNC:4422]	102.304	53.136	0.932182	0.000721605	0.0274982
ENSG00000230006	ANKRD36BP2	ankyrin repeat domain 36B pseudogene 2 [Source:HGNC Symbol;Acc:HGNC:33607]	1.966	0.748	1.02989	0.00073495	0.0278038
ENSG00000157214	STEAP2	STEAP2 metalloreductase [Source:HGNC Symbol;Acc:HGNC:17885]	4.47	2.828	0.739149	0.000758923	0.0283681
ENSG00000091137	SLC26A4	solute carrier family 26 member 4 [Source:HGNC Symbol;Acc:HGNC:8818]	4.524	0.432	3.01979	0.000762482	0.0284333
ENSG00000106565	TMEM176B	transmembrane protein 176B [Source:HGNC Symbol;Acc:HGNC:29596]	190.378	101.93	0.970802	0.000766485	0.0284558
ENSG00000151623	NR3C2	nuclear receptor subfamily 3 group C member 2 [Source:HGNC Symbol;Acc:HGNC:7979]	6.504	3.542	0.801287	0.000766719	0.0284558
ENSG00000160593	JAML	junction adhesion molecule like [Source:HGNC Symbol;Acc:HGNC:19084]	1.784	0.368	2.04251	0.00077254	0.0285366
ENSG00000151715	TMEM45B	transmembrane protein 45B [Source:HGNC Symbol;Acc:HGNC:25194]	26.64	13.832	0.877989	0.00077895	0.0285712
ENSG00000167363	FN3K	fructosamine 3 kinase [Source:HGNC Symbol;Acc:HGNC:24822]	9.76	5.054	0.805638	0.000780809	0.0285725
ENSG00000007171	NOS2	nitric oxide synthase 2 [Source:HGNC Symbol;Acc:HGNC:7873]	1.964	0.076	4.64001	0.000788712	0.0286155
ENSG00000170959	DCDC1	doublecortin domain containing 1 [Source:HGNC Symbol;Acc:HGNC:20625]	0.66	0.326	0.919784	0.000797899	0.0286805
ENSG00000100350	FOXRED2	FAD dependent oxidoreductase domain containing 2 [Source:HGNC Symbol;Acc:HGNC:26264]	3.954	2.16	0.803569	0.000801397	0.0286805
ENSG00000162437	RAVER2	ribonucleoprotein, PTB binding 2 [Source:HGNC Symbol;Acc:HGNC:25577]	6.688	4.228	0.492137	0.00079928	0.0286805
ENSG00000144369	FAM171B	family with sequence similarity 171 member B [Source:HGNC Symbol;Acc:HGNC:29412]	4.504	2.638	0.615442	0.000812678	0.028862
ENSG00000138207	RBP4	retinol binding protein 4 [Source:HGNC Symbol;Acc:HGNC:9922]	202.664	91.658	0.87933	0.00082203	0.0290897
ENSG00000117472	TSPAN1	tetraspanin 1 [Source:HGNC Symbol;Acc:HGNC:20657]	62.802	17.426	1.83469	0.000839254	0.0292748
ENSG00000007306	CEACAM7	carcinoembryonic antigen related cell adhesion molecule 7 [Source:HGNC Symbol;Acc:HGNC:1819]	248.234	32.118	2.52285	0.000848657	0.0293057
ENSG00000075461	CACNG4	calcium voltage-gated channel auxiliary subunit gamma 4 [Source:HGNC Symbol;Acc:HGNC:1408]	2.02	0.894	1.08791	0.000849493	0.0293057
ENSG00000188994	ZNF292	zinc finger protein 292 [Source:HGNC Symbol;Acc:HGNC:18410]	34.55	16.9	0.863245	0.000843353	0.0293057
ENSG00000254343	AC091563.1		0.71	0.324	0.979255	0.000864058	0.0296848
ENSG00000171503	ETFDH	electron transfer flavoprotein dehydrogenase [Source:HGNC Symbol;Acc:HGNC:3483]	27.95	16.698	0.525472	0.000879792	0.0297859
ENSG00000137216	TMEM63B	transmembrane protein 63B [Source:HGNC Symbol;Acc:HGNC:17735]	19.698	11.31	0.57154	0.00088791	0.0298422
ENSG00000119899	SLC17A5	solute carrier family 17 member 5 [Source:HGNC Symbol;Acc:HGNC:10933]	19.03	11.906	0.534252	0.000887539	0.0298422
ENSG00000185896	LAMP1	lysosomal associated membrane protein 1 [Source:HGNC Symbol;Acc:HGNC:6499]	149.72	82.322	0.738828	0.000903445	0.0300907
ENSG00000169894	MUC3A	mucin 3A, cell surface associated [Source:HGNC Symbol;Acc:HGNC:7513]	7.138	6.666	1.23602	0.000953168	0.0309085
ENSG00000134121	CHL1	cell adhesion molecule L1 like [Source:HGNC Symbol;Acc:HGNC:1939]	2.614	1.06	1.1516	0.000954015	0.0309085
ENSG00000113231	PDE8B	phosphodiesterase 8B [Source:HGNC Symbol;Acc:HGNC:8794]	6.858	3.948	0.798718	0.000953184	0.0309085
ENSG00000188505	NCCRP1	non-specific cytotoxic cell receptor protein 1 homolog (zebrafish) [Source:HGNC Symbol;Acc:HGNC:33739]	6.544	0.964	2.25092	0.000978614	0.0313437
ENSG00000132855	ANGPTL3	angiopoietin like 3 [Source:HGNC Symbol;Acc:HGNC:491]	0.53	0.16	2.03857	0.000993083	0.0314852
ENSG00000100365	NCF4	neutrophil cytosolic factor 4 [Source:HGNC Symbol;Acc:HGNC:7662]	1.972	0.822	1.06901	0.000991032	0.0314852
ENSG00000115648	MLPH	melanophilin [Source:HGNC Symbol;Acc:HGNC:29643]	19.524	10.548	0.81133	0.00100945	0.0318107
ENSG00000134827	TCN1	transcobalamin 1 [Source:HGNC Symbol;Acc:HGNC:11652]	104.82	25.456	3.08855	0.00101503	0.031826
ENSG00000112782	CLIC5	chloride intracellular channel 5 [Source:HGNC Symbol;Acc:HGNC:13517]	1.396	0.5	1.62462	0.00103483	0.031826
ENSG00000104763	ASAH1	N-acylsphingosine amidohydrolase 1 [Source:HGNC Symbol;Acc:HGNC:735]	178.014	83.75	1.08241	0.00103635	0.031826
ENSG00000132274	TRIM22	tripartite motif containing 22 [Source:HGNC Symbol;Acc:HGNC:16379]	31.64	14.562	1.03832	0.00103617	0.031826
ENSG00000163590	PPM1L	protein phosphatase, Mg2+/Mn2+ dependent 1L [Source:HGNC Symbol;Acc:HGNC:16381]	4.082	2.862	0.576245	0.00103475	0.031826
ENSG00000132718	SYT11	synaptotagmin 11 [Source:HGNC Symbol;Acc:HGNC:19239]	13.562	8.048	0.609835	0.00104195	0.0318732
ENSG00000134255	CEPT1	choline/ethanolamine phosphotransferase 1 [Source:HGNC Symbol;Acc:HGNC:24289]	18.04	12.024	0.491097	0.00104164	0.0318732
ENSG00000165799	RNASE7	ribonuclease A family member 7 [Source:HGNC Symbol;Acc:HGNC:19278]	5.512	1.492	1.77321	0.00106632	0.0319058
ENSG00000135424	ITGA7	integrin subunit alpha 7 [Source:HGNC Symbol;Acc:HGNC:6143]	2.748	1.322	0.918102	0.00105617	0.0319058
ENSG00000173681	BCLAF3	BCLAF1 and THRAP3 family member 3 [Source:HGNC Symbol;Acc:HGNC:27413]	4.244	2.706	0.553536	0.0010509	0.0319058
ENSG00000196323	ZBTB44	zinc finger and BTB domain containing 44 [Source:HGNC Symbol;Acc:HGNC:25001]	12.88	9.224	0.538208	0.00105826	0.0319058
ENSG00000151552	QDPR	quinoid dihydropteridine reductase [Source:HGNC Symbol;Acc:HGNC:9752]	38.514	24.968	0.531598	0.0010674	0.0319058
ENSG00000108960	MMD	monocyte to macrophage differentiation associated [Source:HGNC Symbol;Acc:HGNC:7153]	14.368	9.514	0.569055	0.00107568	0.0320291
ENSG00000181634	TNFSF15	TNF superfamily member 15 [Source:HGNC Symbol;Acc:HGNC:11931]	7.068	1.29	2.06647	0.00108976	0.0322035
ENSG00000134061	CD180	CD180 molecule [Source:HGNC Symbol;Acc:HGNC:6726]	0.516	0.15	1.621	0.00109896	0.0322321
ENSG00000130513	GDF15	growth differentiation factor 15 [Source:HGNC Symbol;Acc:HGNC:30142]	407.582	184.266	1.02705	0.00109845	0.0322321
ENSG00000159212	CLIC6	chloride intracellular channel 6 [Source:HGNC Symbol;Acc:HGNC:2065]	6.502	3.08	0.896129	0.00110899	0.0323898
ENSG00000140022	STON2	stonin 2 [Source:HGNC Symbol;Acc:HGNC:30652]	2.206	1.144	0.780035	0.00111675	0.0323898
ENSG00000164199	ADGRV1	adhesion G protein-coupled receptor V1 [Source:HGNC Symbol;Acc:HGNC:17416]	5.316	2.098	0.72279	0.00111589	0.0323898
ENSG00000144619	CNTN4	contactin 4 [Source:HGNC Symbol;Acc:HGNC:2174]	10.626	5.576	1.10824	0.00114041	0.0325077
ENSG00000079385	CEACAM1	carcinoembryonic antigen related cell adhesion molecule 1 [Source:HGNC Symbol;Acc:HGNC:1814]	24.428	10.176	1.07682	0.00113926	0.0325077
ENSG00000105854	PON2	paraoxonase 2 [Source:HGNC Symbol;Acc:HGNC:9205]	97.11	50.5	0.771767	0.00113201	0.0325077
ENSG00000248092	NNT-AS1	NNT antisense RNA 1 [Source:HGNC Symbol;Acc:HGNC:49005]	6.568	3.94	0.707588	0.00114355	0.0325077
ENSG00000137193	PIM1	Pim-1 proto-oncogene, serine/threonine kinase [Source:HGNC Symbol;Acc:HGNC:8986]	19.132	10.836	0.627992	0.00112743	0.0325077
ENSG00000162461	SLC25A34	solute carrier family 25 member 34 [Source:HGNC Symbol;Acc:HGNC:27653]	3.596	1.24	1.1513	0.00116253	0.0328064
ENSG00000286176			0.474	0.168	1.32883	0.0011762	0.0331324
ENSG00000124140	SLC12A5	solute carrier family 12 member 5 [Source:HGNC Symbol;Acc:HGNC:13818]	9.798	4.96	0.886928	0.00118595	0.0331686
ENSG00000186648	CARMIL3	capping protein regulator and myosin 1 linker 3 [Source:HGNC Symbol;Acc:HGNC:20272]	1.548	0.776	0.913686	0.00119534	0.033253
ENSG00000146267	FAXC	failed axon connections homolog [Source:HGNC Symbol;Acc:HGNC:20742]	5.954	3.436	0.747393	0.00119524	0.033253
ENSG00000023516	AKAP11	A-kinase anchoring protein 11 [Source:HGNC Symbol;Acc:HGNC:369]	11.53	7.47	0.451981	0.00119962	0.0333129
ENSG00000205133	TRIQK	triple QxxK/R motif containing [Source:HGNC Symbol;Acc:HGNC:27828]	24.464	17.526	0.55756	0.00120357	0.0333478
ENSG00000181754	AMIGO1	adhesion molecule with Ig like domain 1 [Source:HGNC Symbol;Acc:HGNC:20824]	5.174	3.1	0.595349	0.00121913	0.0336162
ENSG00000144320	LNPK	lunapark, ER junction formation factor [Source:HGNC Symbol;Acc:HGNC:21610]	13.904	9.966	0.454128	0.00122883	0.0337649
ENSG00000153130	SCOC	short coiled-coil protein [Source:HGNC Symbol;Acc:HGNC:20335]	86.786	55.514	0.501752	0.00124019	0.0339578
ENSG00000273230	AC102953.2		0.526	0.232	0.979498	0.00125243	0.0340549
ENSG00000111271	ACAD10	acyl-CoA dehydrogenase family member 10 [Source:HGNC Symbol;Acc:HGNC:21597]	12.752	7.278	0.648864	0.00125025	0.0340549
ENSG00000143797	MBOAT2	membrane bound O-acyltransferase domain containing 2 [Source:HGNC Symbol;Acc:HGNC:25193]	11.822	6.894	0.759479	0.00126688	0.0343038
ENSG00000127241	MASP1	mannan binding lectin serine peptidase 1 [Source:HGNC Symbol;Acc:HGNC:6901]	0.694	0.132	2.27418	0.00127662	0.0344139
ENSG00000196151	WDSUB1	WD repeat, sterile alpha motif and U-box domain containing 1 [Source:HGNC Symbol;Acc:HGNC:26697]	8.034	4.842	0.543906	0.00128775	0.0345948
ENSG00000169550	MUC15	mucin 15, cell surface associated [Source:HGNC Symbol;Acc:HGNC:14956]	4.564	1.038	2.02939	0.0012924	0.0346011
ENSG00000233369	GTF2IP4	general transcription factor IIi pseudogene 4 [Source:HGNC Symbol;Acc:HGNC:51716]	106.328	54.574	0.802245	0.00129681	0.0346202
ENSG00000178104	PDE4DIP	phosphodiesterase 4D interacting protein [Source:HGNC Symbol;Acc:HGNC:15580]	50.23	33.818	0.607306	0.00129975	0.0346202
ENSG00000105429	MEGF8	multiple EGF like domains 8 [Source:HGNC Symbol;Acc:HGNC:3233]	7.372	4.082	0.635109	0.00132044	0.0346807
ENSG00000047346	FAM214A	family with sequence similarity 214 member A [Source:HGNC Symbol;Acc:HGNC:25609]	21.534	14.604	0.445811	0.00131883	0.0346807
ENSG00000048740	CELF2	CUGBP Elav-like family member 2 [Source:HGNC Symbol;Acc:HGNC:2550]	2.922	1.918	0.651436	0.00133828	0.0349336
ENSG00000197471	SPN	sialophorin [Source:HGNC Symbol;Acc:HGNC:11249]	1.506	0.33	1.92432	0.00134918	0.0349371
ENSG00000197081	IGF2R	insulin like growth factor 2 receptor [Source:HGNC Symbol;Acc:HGNC:5467]	48.736	27.2	0.67916	0.00134575	0.0349371
ENSG00000155093	PTPRN2	protein tyrosine phosphatase, receptor type N2 [Source:HGNC Symbol;Acc:HGNC:9677]	33.546	19.002	0.678894	0.00135135	0.0349371
ENSG00000006740	ARHGAP44	Rho GTPase activating protein 44 [Source:HGNC Symbol;Acc:HGNC:29096]	9.404	6.316	0.459821	0.00134162	0.0349371
ENSG00000156650	KAT6B	lysine acetyltransferase 6B [Source:HGNC Symbol;Acc:HGNC:17582]	8.35	5.814	0.398347	0.00135063	0.0349371
ENSG00000103089	FA2H	fatty acid 2-hydroxylase [Source:HGNC Symbol;Acc:HGNC:21197]	15.622	6.748	0.914555	0.00136038	0.0349857
ENSG00000048392	RRM2B	ribonucleotide reductase regulatory TP53 inducible subunit M2B [Source:HGNC Symbol;Acc:HGNC:17296]	25.872	16.948	0.516752	0.00137233	0.0350057
ENSG00000198848	CES1	carboxylesterase 1 [Source:HGNC Symbol;Acc:HGNC:1863]	45.472	5.328	2.96405	0.00137656	0.0350271
ENSG00000167964	RAB26	RAB26, member RAS oncogene family [Source:HGNC Symbol;Acc:HGNC:14259]	11.78	5.8	0.958621	0.00138172	0.0350271
ENSG00000198478	SH3BGRL2	SH3 domain binding glutamate rich protein like 2 [Source:HGNC Symbol;Acc:HGNC:15567]	20.99	10.55	0.838775	0.00140063	0.0350271
ENSG00000178537	SLC25A20	solute carrier family 25 member 20 [Source:HGNC Symbol;Acc:HGNC:1421]	16.392	8.782	0.721247	0.00140373	0.0350271
ENSG00000183023	SLC8A1	solute carrier family 8 member A1 [Source:HGNC Symbol;Acc:HGNC:11068]	2.734	1.56	0.718028	0.001388	0.0350271
ENSG00000118762	PKD2	polycystin 2, transient receptor potential cation channel [Source:HGNC Symbol;Acc:HGNC:9009]	23.566	18.038	0.385678	0.00140123	0.0350271
ENSG00000145321	GC	GC, vitamin D binding protein [Source:HGNC Symbol;Acc:HGNC:4187]	251.172	139.022	0.837082	0.0014199	0.0350889
ENSG00000164620	RELL2	RELT like 2 [Source:HGNC Symbol;Acc:HGNC:26902]	4.684	2.692	0.706693	0.00141819	0.0350889
ENSG00000168067	MAP4K2	mitogen-activated protein kinase kinase kinase kinase 2 [Source:HGNC Symbol;Acc:HGNC:6864]	4.424	2.698	0.645879	0.0014202	0.0350889
ENSG00000113742	CPEB4	cytoplasmic polyadenylation element binding protein 4 [Source:HGNC Symbol;Acc:HGNC:21747]	25.416	16.982	0.475321	0.00142041	0.0350889
ENSG00000099834	CDHR5	cadherin related family member 5 [Source:HGNC Symbol;Acc:HGNC:7521]	4.24	1.886	1.06999	0.00142954	0.0351482
ENSG00000000003	TSPAN6	tetraspanin 6 [Source:HGNC Symbol;Acc:HGNC:11858]	19.336	9.126	0.892571	0.00148015	0.0357723
ENSG00000156298	TSPAN7	tetraspanin 7 [Source:HGNC Symbol;Acc:HGNC:11854]	47.386	28.14	0.716586	0.00148533	0.0357723
ENSG00000107890	ANKRD26	ankyrin repeat domain 26 [Source:HGNC Symbol;Acc:HGNC:29186]	2.088	1.25	0.503711	0.0014869	0.0357723
ENSG00000115904	SOS1	SOS Ras/Rac guanine nucleotide exchange factor 1 [Source:HGNC Symbol;Acc:HGNC:11187]	13.272	10.038	0.432453	0.00149647	0.0359473
ENSG00000170145	SIK2	salt inducible kinase 2 [Source:HGNC Symbol;Acc:HGNC:21680]	11.764	7.798	0.452528	0.00150244	0.0359751
ENSG00000040341	STAU2	staufen double-stranded RNA binding protein 2 [Source:HGNC Symbol;Acc:HGNC:11371]	26.096	19.456	0.447479	0.00152422	0.0362141
ENSG00000204653	ASPDH	aspartate dehydrogenase domain containing [Source:HGNC Symbol;Acc:HGNC:33856]	2.214	1.288	1.17978	0.00155423	0.0364218
ENSG00000247556	OIP5-AS1	OIP5 antisense RNA 1 [Source:HGNC Symbol;Acc:HGNC:43563]	18.184	13.082	0.461448	0.00154771	0.0364218
ENSG00000103479	RBL2	RB transcriptional corepressor like 2 [Source:HGNC Symbol;Acc:HGNC:9894]	26.868	17.844	0.400106	0.00155575	0.0364218
ENSG00000163082	SGPP2	sphingosine-1-phosphate phosphatase 2 [Source:HGNC Symbol;Acc:HGNC:19953]	39.184	14.502	1.24456	0.00160645	0.0364504
ENSG00000092421	SEMA6A	semaphorin 6A [Source:HGNC Symbol;Acc:HGNC:10738]	19.338	7.94	1.05087	0.00156726	0.0364504
ENSG00000100167	SEPT3	septin 3 [Source:HGNC Symbol;Acc:HGNC:10750]	6.388	2.776	1.02161	0.00158662	0.0364504
ENSG00000178965	ERICH3	glutamate rich 3 [Source:HGNC Symbol;Acc:HGNC:25346]	0.412	0.178	0.906428	0.00160969	0.0364504
ENSG00000155085	AK9	adenylate kinase 9 [Source:HGNC Symbol;Acc:HGNC:33814]	3.584	2.152	0.71124	0.00158088	0.0364504
ENSG00000277363	SRCIN1	SRC kinase signaling inhibitor 1 [Source:HGNC Symbol;Acc:HGNC:29506]	4.166	2.336	0.609774	0.00161131	0.0364504
ENSG00000078114	NEBL	nebulette [Source:HGNC Symbol;Acc:HGNC:16932]	12.744	8.324	0.498865	0.00161101	0.0364504
ENSG00000103249	CLCN7	chloride voltage-gated channel 7 [Source:HGNC Symbol;Acc:HGNC:2025]	28.764	20.196	0.429376	0.00161516	0.0364504
ENSG00000138688	KIAA1109	KIAA1109 [Source:HGNC Symbol;Acc:HGNC:26953]	22.672	15.554	0.403278	0.00156018	0.0364504
ENSG00000090674	MCOLN1	mucolipin 1 [Source:HGNC Symbol;Acc:HGNC:13356]	13.452	8.748	0.459587	0.00162652	0.0365101
ENSG00000266714	MYO15B	myosin XVB [Source:HGNC Symbol;Acc:HGNC:14083]	11.912	4.594	1.15049	0.00165065	0.0367223
ENSG00000104723	TUSC3	tumor suppressor candidate 3 [Source:HGNC Symbol;Acc:HGNC:30242]	179.856	103.354	0.712067	0.00165773	0.0367753
ENSG00000005379	TSPOAP1	TSPO associated protein 1 [Source:HGNC Symbol;Acc:HGNC:16831]	5.482	3.44	0.689618	0.00165567	0.0367753
ENSG00000197444	OGDHL	oxoglutarate dehydrogenase like [Source:HGNC Symbol;Acc:HGNC:25590]	8.618	4.2	0.94199	0.00166834	0.0369007
ENSG00000069869	NEDD4	neural precursor cell expressed, developmentally down-regulated 4, E3 ubiquitin protein ligase [Source:HGNC Symbol;Acc:HGNC:7727]	8.118	4.352	0.793486	0.00167045	0.0369007
ENSG00000073910	FRY	FRY microtubule binding protein [Source:HGNC Symbol;Acc:HGNC:20367]	11.31	5.598	0.734994	0.00166992	0.0369007
ENSG00000146416	AIG1	androgen induced 1 [Source:HGNC Symbol;Acc:HGNC:21607]	31.274	21.708	0.488152	0.00167581	0.0369525
ENSG00000168781	PPIP5K1	diphosphoinositol pentakisphosphate kinase 1 [Source:HGNC Symbol;Acc:HGNC:29023]	17.468	11.254	0.459934	0.00167752	0.0369525
ENSG00000163624	CDS1	CDP-diacylglycerol synthase 1 [Source:HGNC Symbol;Acc:HGNC:1800]	11.848	7.718	0.437345	0.00168009	0.0369572
ENSG00000229314	ORM1	orosomucoid 1 [Source:HGNC Symbol;Acc:HGNC:8498]	44.406	1.93	4.21244	0.00173614	0.0371469
ENSG00000162344	FGF19	fibroblast growth factor 19 [Source:HGNC Symbol;Acc:HGNC:3675]	6.392	0.758	2.92668	0.00172596	0.0371469
ENSG00000167105	TMEM92	transmembrane protein 92 [Source:HGNC Symbol;Acc:HGNC:26579]	3.058	0.594	2.05256	0.00170997	0.0371469
ENSG00000235984	GPC5-AS1	GPC5 antisense RNA 1 [Source:HGNC Symbol;Acc:HGNC:39886]	2.414	0.73	1.21916	0.00170547	0.0371469
ENSG00000054392	HHAT	hedgehog acyltransferase [Source:HGNC Symbol;Acc:HGNC:18270]	3.184	1.328	1.09391	0.00173452	0.0371469
ENSG00000154153	RETREG1	reticulophagy regulator 1 [Source:HGNC Symbol;Acc:HGNC:25964]	24.874	13.034	0.919551	0.00171938	0.0371469
ENSG00000162545	CAMK2N1	calcium/calmodulin dependent protein kinase II inhibitor 1 [Source:HGNC Symbol;Acc:HGNC:24190]	33.422	20.764	0.616448	0.00171392	0.0371469
ENSG00000154265	ABCA5	ATP binding cassette subfamily A member 5 [Source:HGNC Symbol;Acc:HGNC:35]	23.272	13.604	0.580438	0.00172851	0.0371469
ENSG00000186472	PCLO	piccolo presynaptic cytomatrix protein [Source:HGNC Symbol;Acc:HGNC:13406]	5.1	3.476	0.569981	0.00172258	0.0371469
ENSG00000111816	FRK	fyn related Src family tyrosine kinase [Source:HGNC Symbol;Acc:HGNC:3955]	8.928	5.424	0.495358	0.00171029	0.0371469
ENSG00000156931	VPS8	VPS8, CORVET complex subunit [Source:HGNC Symbol;Acc:HGNC:29122]	14.632	10.174	0.500233	0.00173918	0.037161
ENSG00000162896	PIGR	polymeric immunoglobulin receptor [Source:HGNC Symbol;Acc:HGNC:8968]	328.638	31.448	4.30016	0.00185397	0.0372831
ENSG00000088882	CPXM1	carboxypeptidase X, M14 family member 1 [Source:HGNC Symbol;Acc:HGNC:15771]	30.596	1.546	3.75585	0.00182722	0.0372831
ENSG00000112303	VNN2	vanin 2 [Source:HGNC Symbol;Acc:HGNC:12706]	52.68	19.34	1.45998	0.0018063	0.0372831
ENSG00000117707	PROX1	prospero homeobox 1 [Source:HGNC Symbol;Acc:HGNC:9459]	8.418	4.574	0.912493	0.00182746	0.0372831
ENSG00000198203	SULT1C2	sulfotransferase family 1C member 2 [Source:HGNC Symbol;Acc:HGNC:11456]	11.156	5.838	0.899706	0.00182028	0.0372831
ENSG00000149294	NCAM1	neural cell adhesion molecule 1 [Source:HGNC Symbol;Acc:HGNC:7656]	16.596	8.956	0.853544	0.00186392	0.0372831
ENSG00000114200	BCHE	butyrylcholinesterase [Source:HGNC Symbol;Acc:HGNC:983]	2.8	1.556	0.835923	0.00183534	0.0372831
ENSG00000181350	LRRC75A	leucine rich repeat containing 75A [Source:HGNC Symbol;Acc:HGNC:32403]	1.748	0.916	0.793996	0.00180383	0.0372831
ENSG00000153982	GDPD1	glycerophosphodiester phosphodiesterase domain containing 1 [Source:HGNC Symbol;Acc:HGNC:20883]	3.238	2.25	0.759642	0.00185763	0.0372831
ENSG00000188613	NANOS1	nanos C2HC-type zinc finger 1 [Source:HGNC Symbol;Acc:HGNC:23044]	4.506	2.648	0.6354	0.00182044	0.0372831
ENSG00000164187	LMBRD2	LMBR1 domain containing 2 [Source:HGNC Symbol;Acc:HGNC:25287]	6.64	4.744	0.523839	0.00174796	0.0372831
ENSG00000078699	CBFA2T2	CBFA2/RUNX1 translocation partner 2 [Source:HGNC Symbol;Acc:HGNC:1536]	8.106	5.224	0.504099	0.00185105	0.0372831
ENSG00000157873	TNFRSF14	TNF receptor superfamily member 14 [Source:HGNC Symbol;Acc:HGNC:11912]	32.53	21.268	0.484512	0.00182307	0.0372831
ENSG00000107897	ACBD5	acyl-CoA binding domain containing 5 [Source:HGNC Symbol;Acc:HGNC:23338]	26.912	17.536	0.483803	0.00181617	0.0372831
ENSG00000136379	ABHD17C	abhydrolase domain containing 17C [Source:HGNC Symbol;Acc:HGNC:26925]	8.054	5.428	0.478618	0.00184552	0.0372831
ENSG00000109654	TRIM2	tripartite motif containing 2 [Source:HGNC Symbol;Acc:HGNC:15974]	16.568	11.688	0.445647	0.00180222	0.0372831
ENSG00000115295	CLIP4	CAP-Gly domain containing linker protein family member 4 [Source:HGNC Symbol;Acc:HGNC:26108]	23.762	17.718	0.389015	0.00177039	0.0372831
ENSG00000058063	ATP11B	ATPase phospholipid transporting 11B (putative) [Source:HGNC Symbol;Acc:HGNC:13553]	30.802	23.202	0.361617	0.00175573	0.0372831
ENSG00000072954	TMEM38A	transmembrane protein 38A [Source:HGNC Symbol;Acc:HGNC:28462]	4.094	2.138	0.817877	0.00186877	0.0372849
ENSG00000106701	FSD1L	fibronectin type III and SPRY domain containing 1 like [Source:HGNC Symbol;Acc:HGNC:13753]	11.268	4.13	1.40166	0.00187841	0.0372873
ENSG00000149639	SOGA1	suppressor of glucose, autophagy associated 1 [Source:HGNC Symbol;Acc:HGNC:16111]	3.126	1.716	0.716014	0.00187826	0.0372873
ENSG00000204789	ZNF204P	zinc finger protein 204, pseudogene [Source:HGNC Symbol;Acc:HGNC:12995]	9.308	5.384	0.676019	0.00190107	0.0374994
ENSG00000129003	VPS13C	vacuolar protein sorting 13 homolog C [Source:HGNC Symbol;Acc:HGNC:23594]	21.804	12.604	0.612788	0.00189938	0.0374994
ENSG00000164975	SNAPC3	small nuclear RNA activating complex polypeptide 3 [Source:HGNC Symbol;Acc:HGNC:11136]	12.902	8.996	0.476679	0.00192351	0.0377487
ENSG00000204282	TNRC6C-AS1	TNRC6C antisense RNA 1 [Source:HGNC Symbol;Acc:HGNC:44360]	2.796	0.974	1.29558	0.00193221	0.0378024
ENSG00000146859	TMEM140	transmembrane protein 140 [Source:HGNC Symbol;Acc:HGNC:21870]	15.876	6.04	1.23651	0.00193333	0.0378024
ENSG00000111275	ALDH2	aldehyde dehydrogenase 2 family (mitochondrial) [Source:HGNC Symbol;Acc:HGNC:404]	50.334	33.806	0.544526	0.00195751	0.0381324
ENSG00000174808	BTC	betacellulin [Source:HGNC Symbol;Acc:HGNC:1121]	4.324	2.372	0.728043	0.00196636	0.0382099
ENSG00000165029	ABCA1	ATP binding cassette subfamily A member 1 [Source:HGNC Symbol;Acc:HGNC:29]	13.814	3.352	1.6641	0.0019742	0.038226
ENSG00000108582	CPD	carboxypeptidase D [Source:HGNC Symbol;Acc:HGNC:2301]	56.604	31.908	0.715489	0.00198273	0.0382904
ENSG00000136193	SCRN1	secernin 1 [Source:HGNC Symbol;Acc:HGNC:22192]	48.878	33.528	0.392448	0.00198704	0.0383264
ENSG00000106992	AK1	adenylate kinase 1 [Source:HGNC Symbol;Acc:HGNC:361]	43.118	40.098	0.688833	0.00199477	0.0384281
ENSG00000089248	ERP29	endoplasmic reticulum protein 29 [Source:HGNC Symbol;Acc:HGNC:13799]	141.32	82.942	0.610208	0.00201449	0.0385238
ENSG00000002933	TMEM176A	transmembrane protein 176A [Source:HGNC Symbol;Acc:HGNC:24930]	111.574	65.668	0.789936	0.00202217	0.0386216
ENSG00000118322	ATP10B	ATPase phospholipid transporting 10B (putative) [Source:HGNC Symbol;Acc:HGNC:13543]	39.012	11.796	1.68577	0.00206801	0.0386301
ENSG00000164742	ADCY1	adenylate cyclase 1 [Source:HGNC Symbol;Acc:HGNC:232]	3.304	1.472	1.12725	0.00205185	0.0386301
ENSG00000165646	SLC18A2	solute carrier family 18 member A2 [Source:HGNC Symbol;Acc:HGNC:10935]	3.166	1.296	1.00568	0.00206538	0.0386301
ENSG00000029534	ANK1	ankyrin 1 [Source:HGNC Symbol;Acc:HGNC:492]	1.41	0.67	0.872383	0.00207195	0.0386301
ENSG00000055163	CYFIP2	cytoplasmic FMR1 interacting protein 2 [Source:HGNC Symbol;Acc:HGNC:13760]	13.61	7.152	0.828428	0.00208418	0.0386301
ENSG00000065320	NTN1	netrin 1 [Source:HGNC Symbol;Acc:HGNC:8029]	3.028	1.584	0.743335	0.00203023	0.0386301
ENSG00000112992	NNT	nicotinamide nucleotide transhydrogenase [Source:HGNC Symbol;Acc:HGNC:7863]	30.996	18.374	0.69005	0.00208279	0.0386301
ENSG00000182919	C11orf54	chromosome 11 open reading frame 54 [Source:HGNC Symbol;Acc:HGNC:30204]	30.718	19.584	0.627897	0.0020719	0.0386301
ENSG00000176641	RNF152	ring finger protein 152 [Source:HGNC Symbol;Acc:HGNC:26811]	2.154	1.564	0.498832	0.00204933	0.0386301
ENSG00000170113	NIPA1	non imprinted in Prader-Willi/Angelman syndrome 1 [Source:HGNC Symbol;Acc:HGNC:17043]	8.148	6.084	0.488023	0.00206298	0.0386301
ENSG00000071073	MGAT4A	mannosyl (alpha-1,3-)-glycoprotein beta-1,4-N-acetylglucosaminyltransferase, isozyme A [Source:HGNC Symbol;Acc:HGNC:7047]	32.608	23.362	0.467906	0.0020425	0.0386301
ENSG00000180011	ZADH2	zinc binding alcohol dehydrogenase domain containing 2 [Source:HGNC Symbol;Acc:HGNC:28697]	13.282	9.058	0.396832	0.00206588	0.0386301
ENSG00000095932	SMIM24	small integral membrane protein 24 [Source:HGNC Symbol;Acc:HGNC:37244]	35.79	13.496	1.29433	0.00209316	0.0386437
ENSG00000136828	RALGPS1	Ral GEF with PH domain and SH3 binding motif 1 [Source:HGNC Symbol;Acc:HGNC:16851]	8.972	5.316	0.696013	0.0020927	0.0386437
ENSG00000054219	LY75	lymphocyte antigen 75 [Source:HGNC Symbol;Acc:HGNC:6729]	4.96	2.892	0.683055	0.00209007	0.0386437
ENSG00000114439	BBX	BBX, HMG-box containing [Source:HGNC Symbol;Acc:HGNC:14422]	18.412	12.998	0.418012	0.00210227	0.0386906
ENSG00000164344	KLKB1	kallikrein B1 [Source:HGNC Symbol;Acc:HGNC:6371]	2.778	1.17	1.05478	0.00210737	0.0386926
ENSG00000167554	ZNF610	zinc finger protein 610 [Source:HGNC Symbol;Acc:HGNC:26687]	2.32	0.92	1.04144	0.00211226	0.0386926
ENSG00000167323	STIM1	stromal interaction molecule 1 [Source:HGNC Symbol;Acc:HGNC:11386]	21.32	15.626	0.37507	0.0021116	0.0386926
ENSG00000114573	ATP6V1A	ATPase H+ transporting V1 subunit A [Source:HGNC Symbol;Acc:HGNC:851]	42.276	30.258	0.429693	0.00214523	0.0390411
ENSG00000173432	SAA1	serum amyloid A1 [Source:HGNC Symbol;Acc:HGNC:10513]	155.862	17.156	3.71059	0.00219477	0.0392264
ENSG00000169994	MYO7B	myosin VIIB [Source:HGNC Symbol;Acc:HGNC:7607]	1.462	0.27	2.62313	0.00220652	0.0392264
ENSG00000140297	GCNT3	glucosaminyl (N-acetyl) transferase 3, mucin type [Source:HGNC Symbol;Acc:HGNC:4205]	98.102	38.004	1.35868	0.00217949	0.0392264
ENSG00000259495	AC016705.2		1.338	0.808	0.820058	0.00219117	0.0392264
ENSG00000119125	GDA	guanine deaminase [Source:HGNC Symbol;Acc:HGNC:4212]	23.192	14.174	0.740708	0.00220307	0.0392264
ENSG00000077157	PPP1R12B	protein phosphatase 1 regulatory subunit 12B [Source:HGNC Symbol;Acc:HGNC:7619]	4.548	3.052	0.62157	0.00218068	0.0392264
ENSG00000106049	HIBADH	3-hydroxyisobutyrate dehydrogenase [Source:HGNC Symbol;Acc:HGNC:4907]	33.102	19.844	0.574015	0.0021676	0.0392264
ENSG00000101460	MAP1LC3A	microtubule associated protein 1 light chain 3 alpha [Source:HGNC Symbol;Acc:HGNC:6838]	22.552	15.142	0.526824	0.0021646	0.0392264
ENSG00000145439	CBR4	carbonyl reductase 4 [Source:HGNC Symbol;Acc:HGNC:25891]	14.504	9.776	0.420954	0.00220493	0.0392264
ENSG00000154429	CCSAP	centriole, cilia and spindle associated protein [Source:HGNC Symbol;Acc:HGNC:29578]	2.272	1.306	0.644884	0.00221812	0.0393433
ENSG00000145287	PLAC8	placenta specific 8 [Source:HGNC Symbol;Acc:HGNC:19254]	8.748	4.036	1.01987	0.00223447	0.0394747
ENSG00000142619	PADI3	peptidyl arginine deiminase 3 [Source:HGNC Symbol;Acc:HGNC:18337]	1.512	0.322	2.21554	0.00226046	0.0396011
ENSG00000285865			1.226	0.536	0.934944	0.00224891	0.0396011
ENSG00000259834	AL365361.1		0.734	0.338	0.921701	0.00226552	0.0396011
ENSG00000125124	BBS2	Bardet-Biedl syndrome 2 [Source:HGNC Symbol;Acc:HGNC:967]	21.072	13.51	0.565862	0.00225892	0.0396011
ENSG00000092964	DPYSL2	dihydropyrimidinase like 2 [Source:HGNC Symbol;Acc:HGNC:3014]	15.092	9.746	0.501222	0.00226185	0.0396011
ENSG00000117020	AKT3	AKT serine/threonine kinase 3 [Source:HGNC Symbol;Acc:HGNC:393]	20.268	15.328	0.396472	0.00226351	0.0396011
ENSG00000186088	GSAP	gamma-secretase activating protein [Source:HGNC Symbol;Acc:HGNC:28042]	12.872	7.56	0.622001	0.00228106	0.0398283
ENSG00000165312	OTUD1	OTU deubiquitinase 1 [Source:HGNC Symbol;Acc:HGNC:27346]	11.07	6.536	0.61951	0.00229625	0.0399415
ENSG00000277399	GPR179	G protein-coupled receptor 179 [Source:HGNC Symbol;Acc:HGNC:31371]	0.176	0.034	1.81366	0.00233982	0.0400155
ENSG00000160323	ADAMTS13	ADAM metallopeptidase with thrombospondin type 1 motif 13 [Source:HGNC Symbol;Acc:HGNC:1366]	1.584	0.876	0.850421	0.00233199	0.0400155
ENSG00000184307	ZDHHC23	zinc finger DHHC-type containing 23 [Source:HGNC Symbol;Acc:HGNC:28654]	6.486	3.578	0.682111	0.00234074	0.0400155
ENSG00000110090	CPT1A	carnitine palmitoyltransferase 1A [Source:HGNC Symbol;Acc:HGNC:2328]	27.392	18.366	0.486997	0.00233646	0.0400155
ENSG00000106299	WASL	Wiskott-Aldrich syndrome like [Source:HGNC Symbol;Acc:HGNC:12735]	29.428	18.778	0.476181	0.00231883	0.0400155
ENSG00000076351	SLC46A1	solute carrier family 46 member 1 [Source:HGNC Symbol;Acc:HGNC:30521]	6.612	4.534	0.439222	0.00234487	0.0400155
ENSG00000042980	ADAM28	ADAM metallopeptidase domain 28 [Source:HGNC Symbol;Acc:HGNC:206]	7.08	2.296	1.44493	0.00236468	0.0402124
ENSG00000162777	DENND2D	DENN domain containing 2D [Source:HGNC Symbol;Acc:HGNC:26192]	31.466	14.194	0.935024	0.00236362	0.0402124
ENSG00000175928	LRRN1	leucine rich repeat neuronal 1 [Source:HGNC Symbol;Acc:HGNC:20980]	4.402	2.058	0.914874	0.00236953	0.0402511
ENSG00000133048	CHI3L1	chitinase 3 like 1 [Source:HGNC Symbol;Acc:HGNC:1932]	49.922	6.452	2.47369	0.00238678	0.0404259
ENSG00000023171	GRAMD1B	GRAM domain containing 1B [Source:HGNC Symbol;Acc:HGNC:29214]	3.772	2.054	0.690162	0.00240853	0.0404986
ENSG00000087301	TXNDC16	thioredoxin domain containing 16 [Source:HGNC Symbol;Acc:HGNC:19965]	3.916	2.22	0.667643	0.00240531	0.0404986
ENSG00000153561	RMND5A	required for meiotic nuclear division 5 homolog A [Source:HGNC Symbol;Acc:HGNC:25850]	13.642	9.994	0.392809	0.00240649	0.0404986
ENSG00000169413	RNASE6	ribonuclease A family member k6 [Source:HGNC Symbol;Acc:HGNC:10048]	3.538	0.568	2.41879	0.0024576	0.0405244
ENSG00000187889	FYB2	FYN binding protein 2 [Source:HGNC Symbol;Acc:HGNC:27295]	3.228	1.482	0.838223	0.00248971	0.0405244
ENSG00000178538	CA8	carbonic anhydrase 8 [Source:HGNC Symbol;Acc:HGNC:1382]	5.778	3.44	0.77853	0.00243628	0.0405244
ENSG00000197969	VPS13A	vacuolar protein sorting 13 homolog A [Source:HGNC Symbol;Acc:HGNC:1908]	10.43	6.518	0.482069	0.00245319	0.0405244
ENSG00000137509	PRCP	prolylcarboxypeptidase [Source:HGNC Symbol;Acc:HGNC:9344]	42.014	29.218	0.414577	0.00248781	0.0405244
ENSG00000157741	UBN2	ubinuclein 2 [Source:HGNC Symbol;Acc:HGNC:21931]	2.704	1.834	0.404711	0.00247884	0.0405244
ENSG00000138760	SCARB2	scavenger receptor class B member 2 [Source:HGNC Symbol;Acc:HGNC:1665]	156.936	109.792	0.40146	0.0024826	0.0405244
ENSG00000151883	PARP8	poly(ADP-ribose) polymerase family member 8 [Source:HGNC Symbol;Acc:HGNC:26124]	22.406	15.064	0.385001	0.00242716	0.0405244
ENSG00000166532	RIMKLB	ribosomal modification protein rimK like family member B [Source:HGNC Symbol;Acc:HGNC:29228]	15.026	10.226	0.37426	0.00243811	0.0405244
ENSG00000106789	CORO2A	coronin 2A [Source:HGNC Symbol;Acc:HGNC:2255]	2.014	0.724	1.29593	0.00250066	0.0405438
ENSG00000132635	PCED1A	PC-esterase domain containing 1A [Source:HGNC Symbol;Acc:HGNC:16212]	12.128	7.082	0.694738	0.00250912	0.0406041
ENSG00000124491	F13A1	coagulation factor XIII A chain [Source:HGNC Symbol;Acc:HGNC:3531]	0.946	0.32	1.60448	0.00253442	0.0407119
ENSG00000113805	CNTN3	contactin 3 [Source:HGNC Symbol;Acc:HGNC:2173]	1.968	0.676	1.04168	0.0025333	0.0407119
ENSG00000241316	SUCLG2-AS1	SUCLG2 antisense RNA 1 (head to head) [Source:HGNC Symbol;Acc:HGNC:49643]	2.514	1.182	0.924306	0.00252852	0.0407119
ENSG00000168528	SERINC2	serine incorporator 2 [Source:HGNC Symbol;Acc:HGNC:23231]	188.06	107.506	0.556305	0.00253137	0.0407119
ENSG00000150527	CTAGE5	CTAGE family member 5, ER export factor [Source:HGNC Symbol;Acc:HGNC:7057]	68.876	44.28	0.459209	0.00252207	0.0407119
ENSG00000119801	YPEL5	yippee like 5 [Source:HGNC Symbol;Acc:HGNC:18329]	53.986	36.862	0.370388	0.00252595	0.0407119
ENSG00000121898	CPXM2	carboxypeptidase X, M14 family member 2 [Source:HGNC Symbol;Acc:HGNC:26977]	2.396	0.74	1.40312	0.00257843	0.040971
ENSG00000109321	AREG	amphiregulin [Source:HGNC Symbol;Acc:HGNC:651]	18.756	7.308	1.12364	0.00260053	0.040971
ENSG00000184925	LCN12	lipocalin 12 [Source:HGNC Symbol;Acc:HGNC:28733]	5.734	2.634	1.10957	0.00256848	0.040971
ENSG00000244503	AC108751.5		1.62	0.754	1.00342	0.0026344	0.040971
ENSG00000166801	FAM111A	family with sequence similarity 111 member A [Source:HGNC Symbol;Acc:HGNC:24725]	9.796	5.698	0.808781	0.0026137	0.040971
ENSG00000154080	CHST9	carbohydrate sulfotransferase 9 [Source:HGNC Symbol;Acc:HGNC:19898]	13.762	8.018	0.80493	0.0026393	0.040971
ENSG00000188385	JAKMIP3	Janus kinase and microtubule interacting protein 3 [Source:HGNC Symbol;Acc:HGNC:23523]	1.108	0.606	0.794579	0.00259811	0.040971
ENSG00000224660	SH3BP5-AS1	SH3BP5 antisense RNA 1 [Source:HGNC Symbol;Acc:HGNC:44501]	2.126	1.186	0.73165	0.00257541	0.040971
ENSG00000055732	MCOLN3	mucolipin 3 [Source:HGNC Symbol;Acc:HGNC:13358]	8.556	4.624	0.726117	0.00256378	0.040971
ENSG00000182700	IGIP	IgA inducing protein [Source:HGNC Symbol;Acc:HGNC:33847]	4.33	2.358	0.721716	0.00263958	0.040971
ENSG00000072858	SIDT1	SID1 transmembrane family member 1 [Source:HGNC Symbol;Acc:HGNC:25967]	1.218	0.852	0.651762	0.00263873	0.040971
ENSG00000136156	ITM2B	integral membrane protein 2B [Source:HGNC Symbol;Acc:HGNC:6174]	535.06	340.78	0.640349	0.00261219	0.040971
ENSG00000182463	TSHZ2	teashirt zinc finger homeobox 2 [Source:HGNC Symbol;Acc:HGNC:13010]	5.878	3.392	0.619748	0.00256075	0.040971
ENSG00000166263	STXBP4	syntaxin binding protein 4 [Source:HGNC Symbol;Acc:HGNC:19694]	5.622	3.88	0.580172	0.00262754	0.040971
ENSG00000067141	NEO1	neogenin 1 [Source:HGNC Symbol;Acc:HGNC:7754]	26.048	16.526	0.580032	0.00260829	0.040971
ENSG00000138378	STAT4	signal transducer and activator of transcription 4 [Source:HGNC Symbol;Acc:HGNC:11365]	6.422	4.268	0.498028	0.00263066	0.040971
ENSG00000164114	MAP9	microtubule associated protein 9 [Source:HGNC Symbol;Acc:HGNC:26118]	11.544	8.704	0.386375	0.00261201	0.040971
ENSG00000160183	TMPRSS3	transmembrane serine protease 3 [Source:HGNC Symbol;Acc:HGNC:11877]	10.106	2.478	1.86026	0.00269368	0.0413139
ENSG00000273221	AL355816.2		2.432	0.934	1.06248	0.00268542	0.0413139
ENSG00000111110	PPM1H	protein phosphatase, Mg2+/Mn2+ dependent 1H [Source:HGNC Symbol;Acc:HGNC:18583]	10.198	4.792	0.99231	0.00269475	0.0413139
ENSG00000141497	ZMYND15	zinc finger MYND-type containing 15 [Source:HGNC Symbol;Acc:HGNC:20997]	2.132	1.166	0.720482	0.00269434	0.0413139
ENSG00000168026	TTC21A	tetratricopeptide repeat domain 21A [Source:HGNC Symbol;Acc:HGNC:30761]	3.276	1.874	0.611803	0.00269253	0.0413139
ENSG00000182606	TRAK1	trafficking kinesin protein 1 [Source:HGNC Symbol;Acc:HGNC:29947]	21.32	14.784	0.383468	0.00270115	0.0413139
ENSG00000154917	RAB6B	RAB6B, member RAS oncogene family [Source:HGNC Symbol;Acc:HGNC:14902]	6.288	3.568	0.742459	0.00270387	0.0413152
ENSG00000049860	HEXB	hexosaminidase subunit beta [Source:HGNC Symbol;Acc:HGNC:4879]	164.46	99.358	0.687784	0.00271632	0.0414465
ENSG00000152223	EPG5	ectopic P-granules autophagy protein 5 homolog [Source:HGNC Symbol;Acc:HGNC:29331]	6.612	4.346	0.477402	0.00271776	0.0414465
ENSG00000140274	DUOXA2	dual oxidase maturation factor 2 [Source:HGNC Symbol;Acc:HGNC:32698]	246.62	100.982	1.53269	0.00274724	0.0416905
ENSG00000135324	MRAP2	melanocortin 2 receptor accessory protein 2 [Source:HGNC Symbol;Acc:HGNC:21232]	11.408	6.94	0.554707	0.0027602	0.0416905
ENSG00000106771	TMEM245	transmembrane protein 245 [Source:HGNC Symbol;Acc:HGNC:1363]	27.132	18.594	0.385349	0.00275111	0.0416905
ENSG00000176978	DPP7	dipeptidyl peptidase 7 [Source:HGNC Symbol;Acc:HGNC:14892]	88.408	62.426	0.431892	0.00276575	0.0417314
ENSG00000109501	WFS1	wolframin ER transmembrane glycoprotein [Source:HGNC Symbol;Acc:HGNC:12762]	21.032	11.744	0.571022	0.00278324	0.0418667
ENSG00000178473	UCN3	urocortin 3 [Source:HGNC Symbol;Acc:HGNC:17781]	45.15	29.576	0.515971	0.0027961	0.0418667
ENSG00000119509	INVS	inversin [Source:HGNC Symbol;Acc:HGNC:17870]	5.888	3.71	0.5072	0.00279493	0.0418667
ENSG00000164070	HSPA4L	heat shock protein family A (Hsp70) member 4 like [Source:HGNC Symbol;Acc:HGNC:17041]	8.154	5.298	0.5009	0.00279108	0.0418667
ENSG00000161277	THAP8	THAP domain containing 8 [Source:HGNC Symbol;Acc:HGNC:23191]	3.546	2.018	0.735234	0.0028109	0.0418793
ENSG00000165113	GKAP1	G kinase anchoring protein 1 [Source:HGNC Symbol;Acc:HGNC:17496]	5.226	3.184	0.563495	0.00280291	0.0418793
ENSG00000143217	NECTIN4	nectin cell adhesion molecule 4 [Source:HGNC Symbol;Acc:HGNC:19688]	16.246	10.42	0.475765	0.00281299	0.0418793
ENSG00000081181	ARG2	arginase 2 [Source:HGNC Symbol;Acc:HGNC:664]	16.724	10.114	0.550559	0.00282341	0.0419945
ENSG00000109846	CRYAB	crystallin alpha B [Source:HGNC Symbol;Acc:HGNC:2389]	98.17	22.474	1.5587	0.00283923	0.0421498
ENSG00000073464	CLCN4	chloride voltage-gated channel 4 [Source:HGNC Symbol;Acc:HGNC:2022]	6.204	3.608	0.66409	0.00286533	0.0423661
ENSG00000160190	SLC37A1	solute carrier family 37 member 1 [Source:HGNC Symbol;Acc:HGNC:11024]	22.118	13.15	0.547124	0.00285929	0.0423661
ENSG00000093072	ADA2	adenosine deaminase 2 [Source:HGNC Symbol;Acc:HGNC:1839]	31.24	18.848	0.834443	0.00288212	0.0424645
ENSG00000130584	ZBTB46	zinc finger and BTB domain containing 46 [Source:HGNC Symbol;Acc:HGNC:16094]	1.784	1.042	0.691943	0.00288916	0.0424773
ENSG00000124098	FAM210B	family with sequence similarity 210 member B [Source:HGNC Symbol;Acc:HGNC:16102]	29.208	18.966	0.458879	0.00289788	0.0424773
ENSG00000163320	CGGBP1	CGG triplet repeat binding protein 1 [Source:HGNC Symbol;Acc:HGNC:1888]	27.984	22.092	0.420381	0.00289688	0.0424773
ENSG00000138193	PLCE1	phospholipase C epsilon 1 [Source:HGNC Symbol;Acc:HGNC:17175]	9.562	3.328	1.28285	0.00290632	0.042541
ENSG00000116209	TMEM59	transmembrane protein 59 [Source:HGNC Symbol;Acc:HGNC:1239]	432.748	271.834	0.558046	0.00293004	0.0427299
ENSG00000140835	CHST4	carbohydrate sulfotransferase 4 [Source:HGNC Symbol;Acc:HGNC:1972]	7.116	2.204	1.5107	0.00295671	0.0430371
ENSG00000226791	AC109826.1		0.978	0.364	1.14871	0.00297737	0.0430387
ENSG00000126016	AMOT	angiomotin [Source:HGNC Symbol;Acc:HGNC:17810]	5.856	2.546	1.12924	0.00300078	0.0430387
ENSG00000204681	GABBR1	gamma-aminobutyric acid type B receptor subunit 1 [Source:HGNC Symbol;Acc:HGNC:4070]	9.292	5.156	0.764676	0.00298531	0.0430387
ENSG00000019505	SYT13	synaptotagmin 13 [Source:HGNC Symbol;Acc:HGNC:14962]	44.27	24.192	0.683771	0.0029802	0.0430387
ENSG00000090581	GNPTG	N-acetylglucosamine-1-phosphate transferase gamma subunit [Source:HGNC Symbol;Acc:HGNC:23026]	37.196	22.586	0.54914	0.00297851	0.0430387
ENSG00000182670	TTC3	tetratricopeptide repeat domain 3 [Source:HGNC Symbol;Acc:HGNC:12393]	51.198	38.066	0.402612	0.00297446	0.0430387
ENSG00000170871	KIAA0232	KIAA0232 [Source:HGNC Symbol;Acc:HGNC:28992]	15.102	10.58	0.335782	0.00298409	0.0430387
ENSG00000134339	SAA2	serum amyloid A2 [Source:HGNC Symbol;Acc:HGNC:10514]	121.492	8.958	3.2588	0.003012	0.0430881
ENSG00000008277	ADAM22	ADAM metallopeptidase domain 22 [Source:HGNC Symbol;Acc:HGNC:201]	1.25	0.604	1.00707	0.00301363	0.0430881
ENSG00000133056	PIK3C2B	phosphatidylinositol-4-phosphate 3-kinase catalytic subunit type 2 beta [Source:HGNC Symbol;Acc:HGNC:8972]	4.612	2.742	0.773402	0.00303773	0.0432518
ENSG00000177888	ZBTB41	zinc finger and BTB domain containing 41 [Source:HGNC Symbol;Acc:HGNC:24819]	8.218	5.308	0.503764	0.00304706	0.0432758
ENSG00000164181	ELOVL7	ELOVL fatty acid elongase 7 [Source:HGNC Symbol;Acc:HGNC:26292]	12.806	8.894	0.440904	0.00304771	0.0432758
ENSG00000105523	FAM83E	family with sequence similarity 83 member E [Source:HGNC Symbol;Acc:HGNC:25972]	2.476	1.112	0.992513	0.00306204	0.0433613
ENSG00000198743	SLC5A3	solute carrier family 5 member 3 [Source:HGNC Symbol;Acc:HGNC:11038]	2.988	1.562	0.801504	0.00306917	0.0434046
ENSG00000121905	HPCA	hippocalcin [Source:HGNC Symbol;Acc:HGNC:5144]	4.594	2.414	0.784522	0.00307891	0.0434824
ENSG00000169903	TM4SF4	transmembrane 4 L six family member 4 [Source:HGNC Symbol;Acc:HGNC:11856]	435.38	138.31	1.6161	0.00309797	0.0436421
ENSG00000114812	VIPR1	vasoactive intestinal peptide receptor 1 [Source:HGNC Symbol;Acc:HGNC:12694]	2.102	0.988	1.02367	0.00311743	0.0436421
ENSG00000239305	RNF103	ring finger protein 103 [Source:HGNC Symbol;Acc:HGNC:12859]	34.05	22.81	0.394255	0.0031074	0.0436421
ENSG00000126217	MCF2L	MCF.2 cell line derived transforming sequence like [Source:HGNC Symbol;Acc:HGNC:14576]	15.446	9.718	0.523249	0.00314011	0.0437549
ENSG00000136542	GALNT5	polypeptide N-acetylgalactosaminyltransferase 5 [Source:HGNC Symbol;Acc:HGNC:4127]	1.342	0.498	1.24548	0.00317931	0.0438543
ENSG00000178573	MAF	MAF bZIP transcription factor [Source:HGNC Symbol;Acc:HGNC:6776]	3.07	1.388	1.21726	0.00318203	0.0438543
ENSG00000143469	SYT14	synaptotagmin 14 [Source:HGNC Symbol;Acc:HGNC:23143]	3.074	1.792	0.779115	0.0031774	0.0438543
ENSG00000197971	MBP	myelin basic protein [Source:HGNC Symbol;Acc:HGNC:6925]	19.216	13.258	0.430203	0.00317304	0.0438543
ENSG00000135535	CD164	CD164 molecule [Source:HGNC Symbol;Acc:HGNC:1632]	150.494	108.38	0.3873	0.00317044	0.0438543
ENSG00000079950	STX7	syntaxin 7 [Source:HGNC Symbol;Acc:HGNC:11442]	33.63	22.998	0.478218	0.00319942	0.043917
ENSG00000110492	MDK	midkine [Source:HGNC Symbol;Acc:HGNC:6972]	153.126	44.484	1.70992	0.00320518	0.043952
ENSG00000103460	TOX3	TOX high mobility group box family member 3 [Source:HGNC Symbol;Acc:HGNC:11972]	5.768	3.504	0.513504	0.00320758	0.043952
ENSG00000060237	WNK1	WNK lysine deficient protein kinase 1 [Source:HGNC Symbol;Acc:HGNC:14540]	31.554	23.134	0.394607	0.00321721	0.0439686
ENSG00000064787	BCAS1	breast carcinoma amplified sequence 1 [Source:HGNC Symbol;Acc:HGNC:974]	1.97	0.382	1.96456	0.00326578	0.0440716
ENSG00000021300	PLEKHB1	pleckstrin homology domain containing B1 [Source:HGNC Symbol;Acc:HGNC:19079]	19.134	5.992	1.83901	0.00323302	0.0440716
ENSG00000143786	CNIH3	cornichon family AMPA receptor auxiliary protein 3 [Source:HGNC Symbol;Acc:HGNC:26802]	3.218	1.65	0.857441	0.00322878	0.0440716
ENSG00000153291	SLC25A27	solute carrier family 25 member 27 [Source:HGNC Symbol;Acc:HGNC:21065]	8.3	4.708	0.737466	0.00323463	0.0440716
ENSG00000177692	DNAJC28	DnaJ heat shock protein family (Hsp40) member C28 [Source:HGNC Symbol;Acc:HGNC:1297]	2.584	1.474	0.729814	0.00326093	0.0440716
ENSG00000116117	PARD3B	par-3 family cell polarity regulator beta [Source:HGNC Symbol;Acc:HGNC:14446]	3.096	1.806	0.699125	0.00326872	0.0440716
ENSG00000184992	BRI3BP	BRI3 binding protein [Source:HGNC Symbol;Acc:HGNC:14251]	6.868	4.37	0.521991	0.00324813	0.0440716
ENSG00000166128	RAB8B	RAB8B, member RAS oncogene family [Source:HGNC Symbol;Acc:HGNC:30273]	20.26	14.854	0.483878	0.00327259	0.0440716
ENSG00000100997	ABHD12	abhydrolase domain containing 12 [Source:HGNC Symbol;Acc:HGNC:15868]	52.952	33.89	0.393523	0.00325032	0.0440716
ENSG00000170677	SOCS6	suppressor of cytokine signaling 6 [Source:HGNC Symbol;Acc:HGNC:16833]	12.812	9.242	0.373289	0.00326953	0.0440716
ENSG00000285219	AL591485.1		4.628	1.614	1.52584	0.00328785	0.0440961
ENSG00000127954	STEAP4	STEAP4 metalloreductase [Source:HGNC Symbol;Acc:HGNC:21923]	12.386	4.224	1.38097	0.00328109	0.0440961
ENSG00000137203	TFAP2A	transcription factor AP-2 alpha [Source:HGNC Symbol;Acc:HGNC:11742]	0.8	0.364	1.30619	0.00328848	0.0440961
ENSG00000110013	SIAE	sialic acid acetylesterase [Source:HGNC Symbol;Acc:HGNC:18187]	19.468	7.762	1.18726	0.00328504	0.0440961
ENSG00000260244	AC104083.1		5.438	2.672	0.856326	0.00328698	0.0440961
ENSG00000184106	TREML3P	triggering receptor expressed on myeloid cells like 3, pseudogene [Source:HGNC Symbol;Acc:HGNC:30806]	4.378	0.832	2.27321	0.00330835	0.0441358
ENSG00000140279	DUOX2	dual oxidase 2 [Source:HGNC Symbol;Acc:HGNC:13273]	346.932	136.1	1.36677	0.00330136	0.0441358
ENSG00000163346	PBXIP1	PBX homeobox interacting protein 1 [Source:HGNC Symbol;Acc:HGNC:21199]	68.714	40.194	0.755125	0.00331429	0.0441774
ENSG00000107290	SETX	senataxin [Source:HGNC Symbol;Acc:HGNC:445]	12.964	9.296	0.344646	0.00331807	0.0441902
ENSG00000181019	NQO1	NAD(P)H quinone dehydrogenase 1 [Source:HGNC Symbol;Acc:HGNC:2874]	121.786	63.772	0.868631	0.00333398	0.0443448
ENSG00000227766	HCG4P5	HLA complex group 4 pseudogene 5 [Source:HGNC Symbol;Acc:HGNC:22925]	0.146	0.066	1.73168	0.00334311	0.0444104
ENSG00000115290	GRB14	growth factor receptor bound protein 14 [Source:HGNC Symbol;Acc:HGNC:4565]	9.882	4.234	1.14206	0.00338127	0.0444585
ENSG00000180815	MAP3K15	mitogen-activated protein kinase kinase kinase 15 [Source:HGNC Symbol;Acc:HGNC:31689]	3.03	1.446	0.894144	0.00339712	0.0444585
ENSG00000160298	C21orf58	chromosome 21 open reading frame 58 [Source:HGNC Symbol;Acc:HGNC:1300]	6.408	3.154	0.808683	0.00338735	0.0444585
ENSG00000109103	UNC119	unc-119 lipid binding chaperone [Source:HGNC Symbol;Acc:HGNC:12565]	14.764	9.838	0.487356	0.00339403	0.0444585
ENSG00000168234	TTC39C	tetratricopeptide repeat domain 39C [Source:HGNC Symbol;Acc:HGNC:26595]	9.258	6.828	0.455902	0.00336445	0.0444585
ENSG00000138029	HADHB	hydroxyacyl-CoA dehydrogenase trifunctional multienzyme complex subunit beta [Source:HGNC Symbol;Acc:HGNC:4803]	83.232	56.01	0.377757	0.00338637	0.0444585
ENSG00000179362	HMGN2P46	high mobility group nucleosomal binding domain 2 pseudogene 46 [Source:HGNC Symbol;Acc:HGNC:26817]	3.004	1.51	0.717075	0.00341443	0.0444899
ENSG00000142188	TMEM50B	transmembrane protein 50B [Source:HGNC Symbol;Acc:HGNC:1280]	23.712	14.488	0.572835	0.00341295	0.0444899
ENSG00000053770	AP5M1	adaptor related protein complex 5 mu 1 subunit [Source:HGNC Symbol;Acc:HGNC:20192]	22.43	16.984	0.336851	0.00340848	0.0444899
ENSG00000144366	GULP1	GULP, engulfment adaptor PTB domain containing 1 [Source:HGNC Symbol;Acc:HGNC:18649]	50.824	28.09	0.80362	0.00342481	0.04452
ENSG00000030419	IKZF2	IKAROS family zinc finger 2 [Source:HGNC Symbol;Acc:HGNC:13177]	2.552	1.95	0.462544	0.00342527	0.04452
ENSG00000198074	AKR1B10	aldo-keto reductase family 1 member B10 [Source:HGNC Symbol;Acc:HGNC:382]	319.35	125.25	1.15625	0.00343442	0.0445486
ENSG00000184792	OSBP2	oxysterol binding protein 2 [Source:HGNC Symbol;Acc:HGNC:8504]	3.242	1.694	0.791183	0.00345038	0.0445753
ENSG00000147408	CSGALNACT1	chondroitin sulfate N-acetylgalactosaminyltransferase 1 [Source:HGNC Symbol;Acc:HGNC:24290]	10.618	6.772	0.661656	0.00344625	0.0445753
ENSG00000111731	C2CD5	C2 calcium dependent domain containing 5 [Source:HGNC Symbol;Acc:HGNC:29062]	19.238	12.84	0.369504	0.00345514	0.0445753
ENSG00000118777	ABCG2	ATP binding cassette subfamily G member 2 (Junior blood group) [Source:HGNC Symbol;Acc:HGNC:74]	1.078	0.372	1.3819	0.00346295	0.0446304
ENSG00000136040	PLXNC1	plexin C1 [Source:HGNC Symbol;Acc:HGNC:9106]	5.074	2.798	0.961712	0.00346511	0.0446304
ENSG00000109572	CLCN3	chloride voltage-gated channel 3 [Source:HGNC Symbol;Acc:HGNC:2021]	57.134	39.46	0.373628	0.00347667	0.0447392
ENSG00000100485	SOS2	SOS Ras/Rho guanine nucleotide exchange factor 2 [Source:HGNC Symbol;Acc:HGNC:11188]	19.72	14.046	0.338161	0.00347927	0.0447392
ENSG00000104177	MYEF2	myelin expression factor 2 [Source:HGNC Symbol;Acc:HGNC:17940]	24.006	16.37	0.485545	0.00348903	0.0447911
ENSG00000182013	PNMA8A	PNMA family member 8A [Source:HGNC Symbol;Acc:HGNC:25578]	7.726	4.876	0.553808	0.00352127	0.0450942
ENSG00000129988	LBP	lipopolysaccharide binding protein [Source:HGNC Symbol;Acc:HGNC:6517]	6.28	0.96	2.31647	0.00354905	0.0452834
ENSG00000179344	HLA-DQB1	major histocompatibility complex, class II, DQ beta 1 [Source:HGNC Symbol;Acc:HGNC:4944]	16.648	2.364	2.2864	0.00357578	0.0452834
ENSG00000086696	HSD17B2	hydroxysteroid 17-beta dehydrogenase 2 [Source:HGNC Symbol;Acc:HGNC:5211]	39.708	7.804	1.97688	0.00358231	0.0452834
ENSG00000137070	IL11RA	interleukin 11 receptor subunit alpha [Source:HGNC Symbol;Acc:HGNC:5967]	2.58	1.686	0.801124	0.00358119	0.0452834
ENSG00000184939	ZFP90	ZFP90 zinc finger protein [Source:HGNC Symbol;Acc:HGNC:23329]	9.02	5.64	0.495189	0.00356869	0.0452834
ENSG00000132846	ZBED3	zinc finger BED-type containing 3 [Source:HGNC Symbol;Acc:HGNC:20711]	6.19	4.106	0.412192	0.00357374	0.0452834
ENSG00000135083	CCNJL	cyclin J like [Source:HGNC Symbol;Acc:HGNC:25876]	1.69	0.606	1.25639	0.00359257	0.0453764
ENSG00000177054	ZDHHC13	zinc finger DHHC-type containing 13 [Source:HGNC Symbol;Acc:HGNC:18413]	20.386	13.858	0.356886	0.00360061	0.0454007
ENSG00000124107	SLPI	secretory leukocyte peptidase inhibitor [Source:HGNC Symbol;Acc:HGNC:11092]	336.16	71.14	1.80926	0.00362557	0.0455728
ENSG00000206073	SERPINB4	serpin family B member 4 [Source:HGNC Symbol;Acc:HGNC:10570]	136.166	3.408	4.00305	0.00363203	0.0455856
ENSG00000234771	SLC25A25-AS1	SLC25A25 antisense RNA 1 [Source:HGNC Symbol;Acc:HGNC:27844]	1.686	0.942	0.641136	0.00364759	0.0456364
ENSG00000166432	ZMAT1	zinc finger matrin-type 1 [Source:HGNC Symbol;Acc:HGNC:29377]	3.21	2.026	0.584891	0.00365173	0.0456364
ENSG00000141434	MEP1B	meprin A subunit beta [Source:HGNC Symbol;Acc:HGNC:7020]	0.72	0.28	1.41111	0.00367498	0.0457192
ENSG00000213463	SYNJ2BP	synaptojanin 2 binding protein [Source:HGNC Symbol;Acc:HGNC:18955]	15.34	11.368	0.362418	0.00366959	0.0457192
ENSG00000131171	SH3BGRL	SH3 domain binding glutamate rich protein like [Source:HGNC Symbol;Acc:HGNC:10823]	55.264	31.744	0.685343	0.00369323	0.0457337
ENSG00000107518	ATRNL1	attractin like 1 [Source:HGNC Symbol;Acc:HGNC:29063]	7.682	5.084	0.492507	0.00368465	0.0457337
ENSG00000099290	WASHC2A	WASH complex subunit 2A [Source:HGNC Symbol;Acc:HGNC:23416]	24.008	16.25	0.421626	0.00371549	0.0458148
ENSG00000130517	PGPEP1	pyroglutamyl-peptidase I [Source:HGNC Symbol;Acc:HGNC:13568]	17.812	15.056	0.358284	0.00372273	0.0458376
ENSG00000198075	SULT1C4	sulfotransferase family 1C member 4 [Source:HGNC Symbol;Acc:HGNC:11457]	1.366	0.392	1.25438	0.00372787	0.0458521
ENSG00000035862	TIMP2	TIMP metallopeptidase inhibitor 2 [Source:HGNC Symbol;Acc:HGNC:11821]	150.004	76.516	1.0159	0.00374273	0.0459034
ENSG00000151882	CCL28	C-C motif chemokine ligand 28 [Source:HGNC Symbol;Acc:HGNC:17700]	54.036	12.768	2.0596	0.00374923	0.0459112
ENSG00000160179	ABCG1	ATP binding cassette subfamily G member 1 [Source:HGNC Symbol;Acc:HGNC:73]	9.506	5.084	0.795648	0.00376045	0.0459767
ENSG00000010327	STAB1	stabilin 1 [Source:HGNC Symbol;Acc:HGNC:18628]	2.688	2.08	0.472016	0.00377482	0.0460551
ENSG00000109458	GAB1	GRB2 associated binding protein 1 [Source:HGNC Symbol;Acc:HGNC:4066]	8.876	5.874	0.427657	0.00377551	0.0460551
ENSG00000166311	SMPD1	sphingomyelin phosphodiesterase 1 [Source:HGNC Symbol;Acc:HGNC:11120]	67.332	47.042	0.416531	0.00379681	0.0462044
ENSG00000101577	LPIN2	lipin 2 [Source:HGNC Symbol;Acc:HGNC:14450]	15.006	9.446	0.409579	0.00380149	0.0462044
ENSG00000196743	GM2A	GM2 ganglioside activator [Source:HGNC Symbol;Acc:HGNC:4367]	25.998	10.3	1.2451	0.00382494	0.0462441
ENSG00000158092	NCK1	NCK adaptor protein 1 [Source:HGNC Symbol;Acc:HGNC:7664]	35.65	20.016	0.704147	0.0038246	0.0462441
ENSG00000104870	FCGRT	Fc fragment of IgG receptor and transporter [Source:HGNC Symbol;Acc:HGNC:3621]	40.462	21.492	0.826573	0.00384785	0.0463187
ENSG00000110455	ACCS	1-aminocyclopropane-1-carboxylate synthase homolog (inactive) [Source:HGNC Symbol;Acc:HGNC:23989]	8.94	4.572	0.806778	0.00385348	0.0463187
ENSG00000163703	CRELD1	cysteine rich with EGF like domains 1 [Source:HGNC Symbol;Acc:HGNC:14630]	17.824	8.884	0.796894	0.00385296	0.0463187
ENSG00000120756	PLS1	plastin 1 [Source:HGNC Symbol;Acc:HGNC:9090]	42.516	28.528	0.429119	0.00384195	0.0463187
ENSG00000123838	C4BPA	complement component 4 binding protein alpha [Source:HGNC Symbol;Acc:HGNC:1325]	35.684	15.754	1.29535	0.00386752	0.0463807
ENSG00000168710	AHCYL1	adenosylhomocysteinase like 1 [Source:HGNC Symbol;Acc:HGNC:344]	96.276	56.786	0.631659	0.00387981	0.0464405
ENSG00000154803	FLCN	folliculin [Source:HGNC Symbol;Acc:HGNC:27310]	20.94	14.768	0.379349	0.00388141	0.0464405
ENSG00000139508	SLC46A3	solute carrier family 46 member 3 [Source:HGNC Symbol;Acc:HGNC:27501]	23.726	8.288	1.41095	0.00388981	0.0464683
ENSG00000153237	CCDC148	coiled-coil domain containing 148 [Source:HGNC Symbol;Acc:HGNC:25191]	0.812	0.356	1.37614	0.00391549	0.0464683
ENSG00000138722	MMRN1	multimerin 1 [Source:HGNC Symbol;Acc:HGNC:7178]	8.494	4.758	0.607207	0.00389527	0.0464683
ENSG00000172260	NEGR1	neuronal growth regulator 1 [Source:HGNC Symbol;Acc:HGNC:17302]	3.396	2.018	0.596211	0.00391425	0.0464683
ENSG00000077254	USP33	ubiquitin specific peptidase 33 [Source:HGNC Symbol;Acc:HGNC:20059]	26.792	19.892	0.319284	0.00390799	0.0464683
ENSG00000249437	NAIP	NLR family apoptosis inhibitory protein [Source:HGNC Symbol;Acc:HGNC:7634]	2.492	1.46	0.850133	0.00392425	0.0465266
ENSG00000050730	TNIP3	TNFAIP3 interacting protein 3 [Source:HGNC Symbol;Acc:HGNC:19315]	3.694	0.23	3.25399	0.00393162	0.046553
ENSG00000256612	CYP2B7P	cytochrome P450 family 2 subfamily B member 7, pseudogene [Source:HGNC Symbol;Acc:HGNC:2616]	1.574	0.396	1.81637	0.00395001	0.0466496
ENSG00000186529	CYP4F3	cytochrome P450 family 4 subfamily F member 3 [Source:HGNC Symbol;Acc:HGNC:2646]	6.962	2.328	1.45577	0.00394914	0.0466496
ENSG00000127249	ATP13A4	ATPase 13A4 [Source:HGNC Symbol;Acc:HGNC:25422]	6.318	2.078	1.72851	0.00397968	0.0466978
ENSG00000100170	SLC5A1	solute carrier family 5 member 1 [Source:HGNC Symbol;Acc:HGNC:11036]	9.264	4.872	0.916844	0.00399118	0.0466978
ENSG00000135124	P2RX4	purinergic receptor P2X 4 [Source:HGNC Symbol;Acc:HGNC:8535]	40.166	23.336	0.759716	0.00397891	0.0466978
ENSG00000171940	ZNF217	zinc finger protein 217 [Source:HGNC Symbol;Acc:HGNC:13009]	23.458	13.988	0.444521	0.00399236	0.0466978
ENSG00000140199	SLC12A6	solute carrier family 12 member 6 [Source:HGNC Symbol;Acc:HGNC:10914]	6.4	4.314	0.471521	0.00399951	0.0467023
ENSG00000164331	ANKRA2	ankyrin repeat family A member 2 [Source:HGNC Symbol;Acc:HGNC:13208]	15.692	10.584	0.462923	0.00400384	0.0467023
ENSG00000155111	CDK19	cyclin dependent kinase 19 [Source:HGNC Symbol;Acc:HGNC:19338]	6.336	3.408	0.772561	0.00402104	0.0467213
ENSG00000237289	CKMT1B	creatine kinase, mitochondrial 1B [Source:HGNC Symbol;Acc:HGNC:1995]	15.246	8.896	0.692409	0.00402122	0.0467213
ENSG00000069424	KCNAB2	potassium voltage-gated channel subfamily A regulatory beta subunit 2 [Source:HGNC Symbol;Acc:HGNC:6229]	5.828	3.428	0.568049	0.0040198	0.0467213
ENSG00000139323	POC1B	POC1 centriolar protein B [Source:HGNC Symbol;Acc:HGNC:30836]	9.892	6.194	0.532977	0.00406132	0.0469781
ENSG00000158528	PPP1R9A	protein phosphatase 1 regulatory subunit 9A [Source:HGNC Symbol;Acc:HGNC:14946]	6.928	4.088	0.659135	0.00407222	0.0470694
ENSG00000198183	BPIFA1	BPI fold containing family A member 1 [Source:HGNC Symbol;Acc:HGNC:15749]	8.222	0.376	3.58267	0.00407594	0.0470766
ENSG00000119711	ALDH6A1	aldehyde dehydrogenase 6 family member A1 [Source:HGNC Symbol;Acc:HGNC:7179]	5.964	2.736	1.08878	0.00408483	0.0471014
ENSG00000126775	ATG14	autophagy related 14 [Source:HGNC Symbol;Acc:HGNC:19962]	5.516	3.61	0.460073	0.00409352	0.0471071
ENSG00000170099	SERPINA6	serpin family A member 6 [Source:HGNC Symbol;Acc:HGNC:1540]	30.252	10.534	1.63037	0.00410933	0.0472014
ENSG00000174938	SEZ6L2	seizure related 6 homolog like 2 [Source:HGNC Symbol;Acc:HGNC:30844]	35.408	25.138	0.36074	0.00411076	0.0472014
ENSG00000111666	CHPT1	choline phosphotransferase 1 [Source:HGNC Symbol;Acc:HGNC:17852]	18.66	13.19	0.358721	0.00411925	0.0472297
ENSG00000185737	NRG3	neuregulin 3 [Source:HGNC Symbol;Acc:HGNC:7999]	1.494	0.178	2.44951	0.00415301	0.0472582
ENSG00000137142	IGFBPL1	insulin like growth factor binding protein like 1 [Source:HGNC Symbol;Acc:HGNC:20081]	2.352	1.164	0.868457	0.00416532	0.0472582
ENSG00000145476	CYP4V2	cytochrome P450 family 4 subfamily V member 2 [Source:HGNC Symbol;Acc:HGNC:23198]	24.446	13.182	0.776998	0.00414711	0.0472582
ENSG00000126266	FFAR1	free fatty acid receptor 1 [Source:HGNC Symbol;Acc:HGNC:4498]	8.762	4.952	0.740179	0.00415649	0.0472582
ENSG00000211584	SLC48A1	solute carrier family 48 member 1 [Source:HGNC Symbol;Acc:HGNC:26035]	8.106	5.336	0.508037	0.00414588	0.0472582
ENSG00000197892	KIF13B	kinesin family member 13B [Source:HGNC Symbol;Acc:HGNC:14405]	19.136	12.294	0.503345	0.00413819	0.0472582
ENSG00000133639	BTG1	BTG anti-proliferation factor 1 [Source:HGNC Symbol;Acc:HGNC:1130]	73.912	55.048	0.359569	0.00416017	0.0472582
ENSG00000149260	CAPN5	calpain 5 [Source:HGNC Symbol;Acc:HGNC:1482]	14.082	7.164	0.905053	0.0041864	0.0474029
ENSG00000139597	N4BP2L1	NEDD4 binding protein 2 like 1 [Source:HGNC Symbol;Acc:HGNC:25037]	10.138	6.864	0.606649	0.00419186	0.0474029
ENSG00000038002	AGA	aspartylglucosaminidase [Source:HGNC Symbol;Acc:HGNC:318]	26.85	19.522	0.472867	0.00422489	0.047673
ENSG00000125355	TMEM255A	transmembrane protein 255A [Source:HGNC Symbol;Acc:HGNC:26086]	1.574	0.66	1.43876	0.00423505	0.047715
ENSG00000230445	LRRC37A6P	leucine rich repeat containing 37 member A6, pseudogene [Source:HGNC Symbol;Acc:HGNC:33746]	0.244	0.118	1.12086	0.00425813	0.0477264
ENSG00000073605	GSDMB	gasdermin B [Source:HGNC Symbol;Acc:HGNC:23690]	6.184	2.534	1.04204	0.00426191	0.0477264
ENSG00000006715	VPS41	VPS41, HOPS complex subunit [Source:HGNC Symbol;Acc:HGNC:12713]	55.694	38.754	0.583566	0.00426957	0.0477264
ENSG00000114770	ABCC5	ATP binding cassette subfamily C member 5 [Source:HGNC Symbol;Acc:HGNC:56]	12.348	7.464	0.505088	0.00427015	0.0477264
ENSG00000157184	CPT2	carnitine palmitoyltransferase 2 [Source:HGNC Symbol;Acc:HGNC:2330]	13.104	8.632	0.425007	0.00425484	0.0477264
ENSG00000100604	CHGA	chromogranin A [Source:HGNC Symbol;Acc:HGNC:1929]	741.956	430.092	0.568393	0.00429381	0.0478441
ENSG00000198105	ZNF248	zinc finger protein 248 [Source:HGNC Symbol;Acc:HGNC:13041]	6.738	4.15	0.555146	0.00430189	0.0478441
ENSG00000181045	SLC26A11	solute carrier family 26 member 11 [Source:HGNC Symbol;Acc:HGNC:14471]	14.028	8.796	0.481014	0.00430353	0.0478441
ENSG00000170464	DNAJC18	DnaJ heat shock protein family (Hsp40) member C18 [Source:HGNC Symbol;Acc:HGNC:28429]	6.322	5.816	0.417465	0.00431031	0.0478441
ENSG00000287446			1.256	0.56	1.34976	0.00434422	0.047986
ENSG00000214425	LRRC37A4P	leucine rich repeat containing 37 member A4, pseudogene [Source:HGNC Symbol;Acc:HGNC:25479]	7.752	3.446	1.04066	0.00434086	0.047986
ENSG00000165269	AQP7	aquaporin 7 [Source:HGNC Symbol;Acc:HGNC:640]	2.382	0.904	1.38281	0.0043617	0.0480063
ENSG00000132294	EFR3A	EFR3 homolog A [Source:HGNC Symbol;Acc:HGNC:28970]	35.998	26.774	0.340728	0.00436075	0.0480063
ENSG00000105612	DNASE2	deoxyribonuclease 2, lysosomal [Source:HGNC Symbol;Acc:HGNC:2960]	44.252	26.79	0.722327	0.00438863	0.0481673
ENSG00000168216	LMBRD1	LMBR1 domain containing 1 [Source:HGNC Symbol;Acc:HGNC:23038]	81.98	58.332	0.340635	0.00438679	0.0481673
ENSG00000174469	CNTNAP2	contactin associated protein like 2 [Source:HGNC Symbol;Acc:HGNC:13830]	1.504	0.318	2.27937	0.00441809	0.0482655
ENSG00000179912	R3HDM2	R3H domain containing 2 [Source:HGNC Symbol;Acc:HGNC:29167]	20.676	14.688	0.42308	0.00441129	0.0482655
ENSG00000171681	ATF7IP	activating transcription factor 7 interacting protein [Source:HGNC Symbol;Acc:HGNC:20092]	10.83	7.674	0.372383	0.00441788	0.0482655
ENSG00000136688	IL36G	interleukin 36 gamma [Source:HGNC Symbol;Acc:HGNC:15741]	5.71	0.224	3.84601	0.00444223	0.0483826
ENSG00000157087	ATP2B2	ATPase plasma membrane Ca2+ transporting 2 [Source:HGNC Symbol;Acc:HGNC:815]	0.454	0.226	1.04493	0.00443644	0.0483826
ENSG00000184908	CLCNKB	chloride voltage-gated channel Kb [Source:HGNC Symbol;Acc:HGNC:2027]	1.378	0.2	1.8416	0.0044454	0.0483835
ENSG00000183668	PSG9	pregnancy specific beta-1-glycoprotein 9 [Source:HGNC Symbol;Acc:HGNC:9526]	1.9	0.658	1.48823	0.00446953	0.0484768
ENSG00000088926	F11	coagulation factor XI [Source:HGNC Symbol;Acc:HGNC:3529]	11.03	3.726	1.40417	0.00447505	0.0484768
ENSG00000124523	SIRT5	sirtuin 5 [Source:HGNC Symbol;Acc:HGNC:14933]	4.366	2.506	0.664629	0.00448279	0.0484768
ENSG00000135127	BICDL1	BICD family like cargo adaptor 1 [Source:HGNC Symbol;Acc:HGNC:28095]	12.12	7.59	0.508894	0.00448202	0.0484768
ENSG00000138744	NAAA	N-acylethanolamine acid amidase [Source:HGNC Symbol;Acc:HGNC:736]	11.41	7.734	0.634016	0.00449235	0.0484902
ENSG00000145569	FAM105A	family with sequence similarity 105 member A [Source:HGNC Symbol;Acc:HGNC:25629]	6.716	4.172	0.610474	0.00451551	0.0486191
ENSG00000151690	MFSD6	major facilitator superfamily domain containing 6 [Source:HGNC Symbol;Acc:HGNC:24711]	31.314	23.178	0.318923	0.00451436	0.0486191
ENSG00000133985	TTC9	tetratricopeptide repeat domain 9 [Source:HGNC Symbol;Acc:HGNC:20267]	13.096	6.692	0.699515	0.00452935	0.0486303
ENSG00000108306	FBXL20	F-box and leucine rich repeat protein 20 [Source:HGNC Symbol;Acc:HGNC:24679]	3.902	2.746	0.488075	0.00453017	0.0486303
ENSG00000064601	CTSA	cathepsin A [Source:HGNC Symbol;Acc:HGNC:9251]	192.848	83.656	1.07084	0.00454369	0.0486748
ENSG00000087076	HSD17B14	hydroxysteroid 17-beta dehydrogenase 14 [Source:HGNC Symbol;Acc:HGNC:23238]	19.422	11.024	0.845512	0.00453855	0.0486748
ENSG00000204385	SLC44A4	solute carrier family 44 member 4 [Source:HGNC Symbol;Acc:HGNC:13941]	84.554	50.008	0.791501	0.00454789	0.0486748
ENSG00000167608	TMC4	transmembrane channel like 4 [Source:HGNC Symbol;Acc:HGNC:22998]	59.572	39.448	0.59055	0.00454986	0.0486748
ENSG00000149289	ZC3H12C	zinc finger CCCH-type containing 12C [Source:HGNC Symbol;Acc:HGNC:29362]	9.558	5.658	0.645593	0.00456311	0.0487167
ENSG00000145246	ATP10D	ATPase phospholipid transporting 10D (putative) [Source:HGNC Symbol;Acc:HGNC:13549]	8.758	4.566	0.741828	0.00458049	0.0487616
ENSG00000260804	LINC01963	long intergenic non-protein coding RNA 1963 [Source:HGNC Symbol;Acc:HGNC:25283]	3.012	1.898	0.508221	0.00458427	0.0487616
ENSG00000132514	CLEC10A	C-type lectin domain containing 10A [Source:HGNC Symbol;Acc:HGNC:16916]	2.05	0.468	2.40064	0.00459365	0.0488099
ENSG00000146411	SLC2A12	solute carrier family 2 member 12 [Source:HGNC Symbol;Acc:HGNC:18067]	1.592	0.642	1.18998	0.00462382	0.0488871
ENSG00000225138	SLC9A3-AS1	SLC9A3 antisense RNA 1 [Source:HGNC Symbol;Acc:HGNC:40550]	18.59	8.072	0.901933	0.00464324	0.0489318
ENSG00000155016	CYP2U1	cytochrome P450 family 2 subfamily U member 1 [Source:HGNC Symbol;Acc:HGNC:20582]	5.066	3.14	0.510212	0.00464574	0.0489318
ENSG00000241973	PI4KA	phosphatidylinositol 4-kinase alpha [Source:HGNC Symbol;Acc:HGNC:8983]	19.57	13.456	0.383616	0.00464415	0.0489318
ENSG00000089220	PEBP1	phosphatidylethanolamine binding protein 1 [Source:HGNC Symbol;Acc:HGNC:8630]	196.798	134.45	0.442982	0.00466009	0.0489842
ENSG00000185278	ZBTB37	zinc finger and BTB domain containing 37 [Source:HGNC Symbol;Acc:HGNC:28365]	1.436	0.884	0.441136	0.00467458	0.0491035
ENSG00000142192	APP	amyloid beta precursor protein [Source:HGNC Symbol;Acc:HGNC:620]	570.146	382.516	0.494723	0.00471711	0.0494123
ENSG00000152092	ASTN1	astrotactin 1 [Source:HGNC Symbol;Acc:HGNC:773]	0.794	0.44	0.817223	0.00477265	0.0497099
ENSG00000135605	TEC	tec protein tyrosine kinase [Source:HGNC Symbol;Acc:HGNC:11719]	1.752	0.954	0.672659	0.00476596	0.0497099
ENSG00000105662	CRTC1	CREB regulated transcription coactivator 1 [Source:HGNC Symbol;Acc:HGNC:16062]	3.12	2.142	0.524367	0.00476818	0.0497099
ENSG00000135744	AGT	angiotensinogen [Source:HGNC Symbol;Acc:HGNC:333]	66.404	27.472	0.994233	0.00478039	0.0497148
Downregulated
Gene	Gene.name	Gene.description	mean_Non-Improvers_Cultured	mean_Non-Improvers_Basal	logFC	P.Value	adj.P.Val
ENSG00000142669	SH3BGRL3	SH3 domain binding glutamate rich protein like 3 [Source:HGNC Symbol;Acc:HGNC:15568]	175.838	248.23	-0.661251	8.30653e-05	0.0188308
ENSG00000142089	IFITM3	interferon induced transmembrane protein 3 [Source:HGNC Symbol;Acc:HGNC:5414]	658.448	949.322	-0.702669	6.7728e-05	0.0188308
ENSG00000145592	RPL37	ribosomal protein L37 [Source:HGNC Symbol;Acc:HGNC:10347]	1104.9	1604.73	-0.714514	8.52777e-05	0.0188308
ENSG00000179820	MYADM	myeloid associated differentiation marker [Source:HGNC Symbol;Acc:HGNC:7544]	32.292	49.874	-0.786709	9.0997e-05	0.0188308
ENSG00000116741	RGS2	regulator of G protein signaling 2 [Source:HGNC Symbol;Acc:HGNC:9998]	26.39	41.526	-0.812398	6.37274e-05	0.0188308
ENSG00000198918	RPL39	ribosomal protein L39 [Source:HGNC Symbol;Acc:HGNC:10350]	1941.19	3029.38	-0.828422	1.89589e-05	0.0188308
ENSG00000137154	RPS6	ribosomal protein S6 [Source:HGNC Symbol;Acc:HGNC:10429]	848.984	1381.31	-0.871072	7.85518e-05	0.0188308
ENSG00000173457	PPP1R14B	protein phosphatase 1 regulatory inhibitor subunit 14B [Source:HGNC Symbol;Acc:HGNC:9057]	69.092	111.24	-0.871075	5.58259e-05	0.0188308
ENSG00000171223	JUNB	JunB proto-oncogene, AP-1 transcription factor subunit [Source:HGNC Symbol;Acc:HGNC:6205]	54.554	89.156	-0.875848	5.27208e-05	0.0188308
ENSG00000142937	RPS8	ribosomal protein S8 [Source:HGNC Symbol;Acc:HGNC:10441]	861.354	1395.79	-0.8809	6.2883e-05	0.0188308
ENSG00000171863	RPS7	ribosomal protein S7 [Source:HGNC Symbol;Acc:HGNC:10440]	887.01	1421.29	-0.888448	8.314e-05	0.0188308
ENSG00000147604	RPL7	ribosomal protein L7 [Source:HGNC Symbol;Acc:HGNC:10363]	1059.55	1709.63	-0.891508	6.40321e-05	0.0188308
ENSG00000079739	PGM1	phosphoglucomutase 1 [Source:HGNC Symbol;Acc:HGNC:8905]	56.504	93.092	-0.893919	2.58397e-05	0.0188308
ENSG00000101311	FERMT1	fermitin family member 1 [Source:HGNC Symbol;Acc:HGNC:15889]	5.696	9.456	-0.89584	2.04708e-05	0.0188308
ENSG00000229117	RPL41	ribosomal protein L41 [Source:HGNC Symbol;Acc:HGNC:10354]	2259.4	3731.65	-0.913769	4.56897e-05	0.0188308
ENSG00000114391	RPL24	ribosomal protein L24 [Source:HGNC Symbol;Acc:HGNC:10325]	982.822	1618.67	-0.914396	8.19465e-05	0.0188308
ENSG00000187840	EIF4EBP1	eukaryotic translation initiation factor 4E binding protein 1 [Source:HGNC Symbol;Acc:HGNC:3288]	59.408	100.464	-0.918585	7.2524e-05	0.0188308
ENSG00000227063	RPL41P1	ribosomal protein L41 pseudogene 1 [Source:HGNC Symbol;Acc:HGNC:10356]	0	0	-0.924728	7.5752e-05	0.0188308
ENSG00000188643	S100A16	S100 calcium binding protein A16 [Source:HGNC Symbol;Acc:HGNC:20441]	58.87	100.716	-0.936041	5.67773e-05	0.0188308
ENSG00000198755	RPL10A	ribosomal protein L10a [Source:HGNC Symbol;Acc:HGNC:10299]	621.894	1055.28	-0.944455	3.74451e-05	0.0188308
ENSG00000213741	RPS29	ribosomal protein S29 [Source:HGNC Symbol;Acc:HGNC:10419]	1766.84	2941.45	-0.951333	9.18226e-05	0.0188308
ENSG00000077312	SNRPA	small nuclear ribonucleoprotein polypeptide A [Source:HGNC Symbol;Acc:HGNC:11151]	20.74	34.088	-0.952093	7.31023e-05	0.0188308
ENSG00000154127	UBASH3B	ubiquitin associated and SH3 domain containing B [Source:HGNC Symbol;Acc:HGNC:29884]	5.168	7.156	-0.955765	5.85222e-05	0.0188308
ENSG00000130255	RPL36	ribosomal protein L36 [Source:HGNC Symbol;Acc:HGNC:13631]	543.712	924.076	-0.957676	7.99627e-05	0.0188308
ENSG00000204628	RACK1	receptor for activated C kinase 1 [Source:HGNC Symbol;Acc:HGNC:4399]	893.554	1530.34	-0.962831	8.19185e-05	0.0188308
ENSG00000063177	RPL18	ribosomal protein L18 [Source:HGNC Symbol;Acc:HGNC:10310]	630.15	1082.59	-0.9784	5.32499e-05	0.0188308
ENSG00000144713	RPL32	ribosomal protein L32 [Source:HGNC Symbol;Acc:HGNC:10336]	915.85	1571.44	-0.98239	5.11028e-05	0.0188308
ENSG00000170889	RPS9	ribosomal protein S9 [Source:HGNC Symbol;Acc:HGNC:10442]	960.668	1645.8	-0.985936	3.60788e-05	0.0188308
ENSG00000167526	RPL13	ribosomal protein L13 [Source:HGNC Symbol;Acc:HGNC:10303]	812.404	1401.33	-0.988178	4.98209e-05	0.0188308
ENSG00000160752	FDPS	farnesyl diphosphate synthase [Source:HGNC Symbol;Acc:HGNC:3631]	98.062	171.492	-1.00545	5.9737e-05	0.0188308
ENSG00000105640	RPL18A	ribosomal protein L18a [Source:HGNC Symbol;Acc:HGNC:10311]	914.6	1648.5	-1.02163	5.36108e-05	0.0188308
ENSG00000197747	S100A10	S100 calcium binding protein A10 [Source:HGNC Symbol;Acc:HGNC:10487]	276.986	544.718	-1.06703	4.8502e-05	0.0188308
ENSG00000105373	NOP53	NOP53 ribosome biogenesis factor [Source:HGNC Symbol;Acc:HGNC:4333]	117.438	201.496	-1.06865	8.71565e-05	0.0188308
ENSG00000089157	RPLP0	ribosomal protein lateral stalk subunit P0 [Source:HGNC Symbol;Acc:HGNC:10371]	1389.32	2532.27	-1.07053	7.79017e-05	0.0188308
ENSG00000231500	RPS18	ribosomal protein S18 [Source:HGNC Symbol;Acc:HGNC:10401]	2366.84	4292.25	-1.07693	3.88387e-05	0.0188308
ENSG00000143641	GALNT2	polypeptide N-acetylgalactosaminyltransferase 2 [Source:HGNC Symbol;Acc:HGNC:4124]	36.164	70.356	-1.09111	8.79707e-05	0.0188308
ENSG00000197958	RPL12	ribosomal protein L12 [Source:HGNC Symbol;Acc:HGNC:10302]	1141.18	2133.39	-1.09488	4.46811e-05	0.0188308
ENSG00000162244	RPL29	ribosomal protein L29 [Source:HGNC Symbol;Acc:HGNC:10331]	596.796	1127.48	-1.13407	4.54846e-05	0.0188308
ENSG00000136942	RPL35	ribosomal protein L35 [Source:HGNC Symbol;Acc:HGNC:10344]	749.084	1466.98	-1.14189	2.38658e-05	0.0188308
ENSG00000147065	MSN	moesin [Source:HGNC Symbol;Acc:HGNC:7373]	132.178	253.384	-1.15472	2.48889e-05	0.0188308
ENSG00000083845	RPS5	ribosomal protein S5 [Source:HGNC Symbol;Acc:HGNC:10426]	506.186	990.482	-1.16278	8.8072e-05	0.0188308
ENSG00000196923	PDLIM7	PDZ and LIM domain 7 [Source:HGNC Symbol;Acc:HGNC:22958]	34.002	64.71	-1.16441	3.4164e-05	0.0188308
ENSG00000147403	RPL10	ribosomal protein L10 [Source:HGNC Symbol;Acc:HGNC:10298]	2341.49	4476.41	-1.16499	5.62532e-05	0.0188308
ENSG00000198805	PNP	purine nucleoside phosphorylase [Source:HGNC Symbol;Acc:HGNC:7892]	43.37	85.95	-1.16796	6.47842e-05	0.0188308
ENSG00000114942	EEF1B2	eukaryotic translation elongation factor 1 beta 2 [Source:HGNC Symbol;Acc:HGNC:3208]	436.852	895.73	-1.20124	1.76645e-05	0.0188308
ENSG00000112559	MDFI	MyoD family inhibitor [Source:HGNC Symbol;Acc:HGNC:6967]	4.978	9.506	-1.21171	2.5094e-05	0.0188308
ENSG00000225178	RPSAP58	ribosomal protein SA pseudogene 58 [Source:HGNC Symbol;Acc:HGNC:36809]	28.818	60.264	-1.22689	7.24177e-05	0.0188308
ENSG00000240342	RPS2P5	ribosomal protein S2 pseudogene 5 [Source:HGNC Symbol;Acc:HGNC:31386]	105.858	212.014	-1.28956	5.43625e-05	0.0188308
ENSG00000136997	MYC	MYC proto-oncogene, bHLH transcription factor [Source:HGNC Symbol;Acc:HGNC:7553]	16.258	38.006	-1.3443	3.34492e-05	0.0188308
ENSG00000140988	RPS2	ribosomal protein S2 [Source:HGNC Symbol;Acc:HGNC:10404]	704.322	1612.97	-1.40359	3.37313e-05	0.0188308
ENSG00000197903	HIST1H2BK	histone cluster 1 H2B family member k [Source:HGNC Symbol;Acc:HGNC:13954]	11.998	28.462	-1.41271	3.01221e-05	0.0188308
ENSG00000128591	FLNC	filamin C [Source:HGNC Symbol;Acc:HGNC:3756]	0.668	1.572	-1.43435	3.74911e-05	0.0188308
ENSG00000120437	ACAT2	acetyl-CoA acetyltransferase 2 [Source:HGNC Symbol;Acc:HGNC:94]	20.726	50.686	-1.44403	2.2718e-05	0.0188308
ENSG00000176014	TUBB6	tubulin beta 6 class V [Source:HGNC Symbol;Acc:HGNC:20776]	30.27	71.922	-1.48408	2.29038e-05	0.0188308
ENSG00000112972	HMGCS1	3-hydroxy-3-methylglutaryl-CoA synthase 1 [Source:HGNC Symbol;Acc:HGNC:5007]	52.646	135.636	-1.53794	9.23557e-05	0.0188308
ENSG00000197905	TEAD4	TEA domain transcription factor 4 [Source:HGNC Symbol;Acc:HGNC:11717]	7.734	20.964	-1.5978	1.4238e-05	0.0188308
ENSG00000139278	GLIPR1	GLI pathogenesis related 1 [Source:HGNC Symbol;Acc:HGNC:17001]	12.952	41.94	-1.62671	6.26708e-06	0.0188308
ENSG00000167747	C19orf48	chromosome 19 open reading frame 48 [Source:HGNC Symbol;Acc:HGNC:29667]	10.568	30.856	-1.70648	1.03299e-05	0.0188308
ENSG00000171517	LPAR3	lysophosphatidic acid receptor 3 [Source:HGNC Symbol;Acc:HGNC:14298]	0.434	1.314	-1.86032	8.47707e-05	0.0188308
ENSG00000106366	SERPINE1	serpin family E member 1 [Source:HGNC Symbol;Acc:HGNC:8583]	39.694	107.768	-1.86196	6.68057e-05	0.0188308
ENSG00000125144	MT1G	metallothionein 1G [Source:HGNC Symbol;Acc:HGNC:7399]	135.586	534.64	-2.10305	9.42069e-06	0.0188308
ENSG00000105697	HAMP	hepcidin antimicrobial peptide [Source:HGNC Symbol;Acc:HGNC:15598]	5.472	26.184	-2.26854	8.38063e-05	0.0188308
ENSG00000148671	ADIRF	adipogenesis regulatory factor [Source:HGNC Symbol;Acc:HGNC:24043]	4.092	15.364	-2.37443	1.17487e-05	0.0188308
ENSG00000106483	SFRP4	secreted frizzled related protein 4 [Source:HGNC Symbol;Acc:HGNC:10778]	0.442	2.452	-2.5999	3.3071e-05	0.0188308
ENSG00000167748	KLK1	kallikrein 1 [Source:HGNC Symbol;Acc:HGNC:6357]	59.816	445.93	-3.21174	5.37735e-05	0.0188308
ENSG00000007908	SELE	selectin E [Source:HGNC Symbol;Acc:HGNC:10718]	0.154	1.26	-3.51748	5.96812e-05	0.0188308
ENSG00000101444	AHCY	adenosylhomocysteinase [Source:HGNC Symbol;Acc:HGNC:343]	45.918	62.194	-0.617004	0.000139202	0.0188331
ENSG00000107223	EDF1	endothelial differentiation related factor 1 [Source:HGNC Symbol;Acc:HGNC:3164]	280.774	378.008	-0.620244	0.000125133	0.0188331
ENSG00000071082	RPL31	ribosomal protein L31 [Source:HGNC Symbol;Acc:HGNC:10334]	1327.07	1866.55	-0.630897	0.000166243	0.0188331
ENSG00000166508	MCM7	minichromosome maintenance complex component 7 [Source:HGNC Symbol;Acc:HGNC:6950]	24.462	31.504	-0.640039	0.00016902	0.0188331
ENSG00000149806	FAU	FAU, ubiquitin like and ribosomal protein S30 fusion [Source:HGNC Symbol;Acc:HGNC:3597]	597.118	824.35	-0.649567	0.000148762	0.0188331
ENSG00000136930	PSMB7	proteasome subunit beta 7 [Source:HGNC Symbol;Acc:HGNC:9544]	108.696	156.92	-0.671499	0.000183846	0.0188331
ENSG00000131469	RPL27	ribosomal protein L27 [Source:HGNC Symbol;Acc:HGNC:10328]	906.758	1282.85	-0.682003	0.000175174	0.0188331
ENSG00000100558	PLEK2	pleckstrin 2 [Source:HGNC Symbol;Acc:HGNC:19238]	12.39	17.348	-0.694726	0.000147025	0.0188331
ENSG00000069399	BCL3	B cell CLL/lymphoma 3 [Source:HGNC Symbol;Acc:HGNC:998]	23.712	33.012	-0.694758	0.00010954	0.0188331
ENSG00000165502	RPL36AL	ribosomal protein L36a like [Source:HGNC Symbol;Acc:HGNC:10346]	302.878	441.916	-0.711727	0.000166223	0.0188331
ENSG00000109475	RPL34	ribosomal protein L34 [Source:HGNC Symbol;Acc:HGNC:10340]	1230.95	1816.45	-0.751426	0.000155037	0.0188331
ENSG00000164587	RPS14	ribosomal protein S14 [Source:HGNC Symbol;Acc:HGNC:10387]	510.196	779.376	-0.754874	0.000118827	0.0188331
ENSG00000149823	VPS51	VPS51, GARP complex subunit [Source:HGNC Symbol;Acc:HGNC:1172]	47.542	67.548	-0.761248	0.000168202	0.0188331
ENSG00000196205	EEF1A1P5	eukaryotic translation elongation factor 1 alpha 1 pseudogene 5 [Source:HGNC Symbol;Acc:HGNC:3200]	45.848	73.024	-0.77099	0.000156676	0.0188331
ENSG00000100353	EIF3D	eukaryotic translation initiation factor 3 subunit D [Source:HGNC Symbol;Acc:HGNC:3278]	90.358	135.916	-0.771713	0.000103633	0.0188331
ENSG00000177600	RPLP2	ribosomal protein lateral stalk subunit P2 [Source:HGNC Symbol;Acc:HGNC:10377]	883.326	1365.47	-0.777093	0.000168406	0.0188331
ENSG00000138326	RPS24	ribosomal protein S24 [Source:HGNC Symbol;Acc:HGNC:10411]	1883.53	2811.61	-0.778826	0.000111356	0.0188331
ENSG00000171858	RPS21	ribosomal protein S21 [Source:HGNC Symbol;Acc:HGNC:10409]	869.618	1312.55	-0.783793	9.70179e-05	0.0188331
ENSG00000166441	RPL27A	ribosomal protein L27a [Source:HGNC Symbol;Acc:HGNC:10329]	1106.14	1688.54	-0.787604	0.000184911	0.0188331
ENSG00000105193	RPS16	ribosomal protein S16 [Source:HGNC Symbol;Acc:HGNC:10396]	645.386	992.954	-0.793884	0.000122357	0.0188331
ENSG00000112306	RPS12	ribosomal protein S12 [Source:HGNC Symbol;Acc:HGNC:10385]	1891.42	2855.19	-0.797582	0.000142098	0.0188331
ENSG00000132507	EIF5A	eukaryotic translation initiation factor 5A [Source:HGNC Symbol;Acc:HGNC:3300]	195.438	308.858	-0.799466	0.00017143	0.0188331
ENSG00000076003	MCM6	minichromosome maintenance complex component 6 [Source:HGNC Symbol;Acc:HGNC:6949]	3.506	5.632	-0.822769	0.000106987	0.0188331
ENSG00000142676	RPL11	ribosomal protein L11 [Source:HGNC Symbol;Acc:HGNC:10301]	1059.48	1718.26	-0.8355	9.6253e-05	0.0188331
ENSG00000197756	RPL37A	ribosomal protein L37a [Source:HGNC Symbol;Acc:HGNC:10348]	2250.65	3515.87	-0.836982	0.000123402	0.0188331
ENSG00000163682	RPL9	ribosomal protein L9 [Source:HGNC Symbol;Acc:HGNC:10369]	1076.15	1664.19	-0.844866	0.000185507	0.0188331
ENSG00000100297	MCM5	minichromosome maintenance complex component 5 [Source:HGNC Symbol;Acc:HGNC:6948]	5.688	8.76	-0.849192	0.000174531	0.0188331
ENSG00000088826	SMOX	spermine oxidase [Source:HGNC Symbol;Acc:HGNC:15862]	13.102	21.202	-0.871798	0.000128332	0.0188331
ENSG00000143947	RPS27A	ribosomal protein S27a [Source:HGNC Symbol;Acc:HGNC:10417]	1100.25	1724.47	-0.884631	0.000182983	0.0188331
ENSG00000237550	RPL9P9	ribosomal protein L9 pseudogene 9 [Source:HGNC Symbol;Acc:HGNC:17251]	692.414	1114.91	-0.88828	0.000146843	0.0188331
ENSG00000136261	BZW2	basic leucine zipper and W2 domains 2 [Source:HGNC Symbol;Acc:HGNC:18808]	21.466	35.754	-0.892202	0.000115137	0.0188331
ENSG00000103942	HOMER2	homer scaffolding protein 2 [Source:HGNC Symbol;Acc:HGNC:17513]	44.866	77.178	-0.892638	0.000173174	0.0188331
ENSG00000141101	NOB1	NIN1/PSMD8 binding protein 1 homolog [Source:HGNC Symbol;Acc:HGNC:29540]	21.252	35.59	-0.895384	0.000168705	0.0188331
ENSG00000079459	FDFT1	farnesyl-diphosphate farnesyltransferase 1 [Source:HGNC Symbol;Acc:HGNC:3629]	95.386	174.308	-0.906309	0.0001873	0.0188331
ENSG00000171793	CTPS1	CTP synthase 1 [Source:HGNC Symbol;Acc:HGNC:2519]	11.068	19.206	-0.916784	0.000185636	0.0188331
ENSG00000188846	RPL14	ribosomal protein L14 [Source:HGNC Symbol;Acc:HGNC:10305]	551.774	932.452	-0.921998	0.000101152	0.0188331
ENSG00000182899	RPL35A	ribosomal protein L35a [Source:HGNC Symbol;Acc:HGNC:10345]	756.438	1280.78	-0.955198	0.000184921	0.0188331
ENSG00000105372	RPS19	ribosomal protein S19 [Source:HGNC Symbol;Acc:HGNC:10402]	1274	2091.59	-0.978546	0.000187868	0.0188331
ENSG00000104529	EEF1D	eukaryotic translation elongation factor 1 delta [Source:HGNC Symbol;Acc:HGNC:3211]	207.728	368.42	-0.983392	0.000148746	0.0188331
ENSG00000026025	VIM	vimentin [Source:HGNC Symbol;Acc:HGNC:12692]	209.852	361.41	-0.996935	0.000148855	0.0188331
ENSG00000184557	SOCS3	suppressor of cytokine signaling 3 [Source:HGNC Symbol;Acc:HGNC:19391]	13.474	24.412	-1.03261	0.000113279	0.0188331
ENSG00000115268	RPS15	ribosomal protein S15 [Source:HGNC Symbol;Acc:HGNC:10388]	499.04	869.216	-1.0824	0.000150171	0.0188331
ENSG00000269893	SNHG8	small nucleolar RNA host gene 8 [Source:HGNC Symbol;Acc:HGNC:33098]	98.668	200.19	-1.08405	0.000169852	0.0188331
ENSG00000168028	RPSA	ribosomal protein SA [Source:HGNC Symbol;Acc:HGNC:6502]	600.396	1142.07	-1.13328	0.000107115	0.0188331
ENSG00000123416	TUBA1B	tubulin alpha 1b [Source:HGNC Symbol;Acc:HGNC:18809]	313.668	615.538	-1.16754	0.000167389	0.0188331
ENSG00000222041	CYTOR	cytoskeleton regulator RNA [Source:HGNC Symbol;Acc:HGNC:28717]	32.174	66.802	-1.18102	0.000102173	0.0188331
ENSG00000154734	ADAMTS1	ADAM metallopeptidase with thrombospondin type 1 motif 1 [Source:HGNC Symbol;Acc:HGNC:217]	9.19	21.622	-1.40427	0.000117521	0.0188331
ENSG00000073536	NLE1	notchless homolog 1 [Source:HGNC Symbol;Acc:HGNC:19889]	4.774	12.576	-1.41616	0.000118288	0.0188331
ENSG00000164266	SPINK1	serine peptidase inhibitor, Kazal type 1 [Source:HGNC Symbol;Acc:HGNC:11244]	3530.13	9590.41	-1.67166	0.000140104	0.0188331
ENSG00000156140	ADAMTS3	ADAM metallopeptidase with thrombospondin type 1 motif 3 [Source:HGNC Symbol;Acc:HGNC:219]	0.172	0.462	-1.75521	0.000146165	0.0188331
ENSG00000115386	REG1A	regenerating family member 1 alpha [Source:HGNC Symbol;Acc:HGNC:9951]	16734.1	46334.3	-1.78908	0.000122391	0.0188331
ENSG00000205364	MT1M	metallothionein 1M [Source:HGNC Symbol;Acc:HGNC:14296]	13.226	49.354	-1.81072	0.000188788	0.0188331
ENSG00000017483	SLC38A5	solute carrier family 38 member 5 [Source:HGNC Symbol;Acc:HGNC:18070]	12.152	50.092	-2.14374	0.000152398	0.0188331
ENSG00000002079	MYH16	myosin heavy chain 16 pseudogene [Source:HGNC Symbol;Acc:HGNC:31038]	1.144	7.184	-2.89306	0.000104679	0.0188331
ENSG00000135486	HNRNPA1	heterogeneous nuclear ribonucleoprotein A1 [Source:HGNC Symbol;Acc:HGNC:5031]	740.346	1614.72	-1.2468	0.00019149	0.0189512
ENSG00000260549	MT1L	metallothionein 1L, pseudogene [Source:HGNC Symbol;Acc:HGNC:7404]	4.274	14.85	-1.90201	0.000194547	0.0189512
ENSG00000215704	CELA2B	chymotrypsin like elastase family member 2B [Source:HGNC Symbol;Acc:HGNC:29995]	8.022	135.304	-4.81903	0.000194812	0.0189512
ENSG00000139343	SNRPF	small nuclear ribonucleoprotein polypeptide F [Source:HGNC Symbol;Acc:HGNC:11162]	19.532	28.722	-0.740595	0.000197529	0.0190041
ENSG00000215021	PHB2	prohibitin 2 [Source:HGNC Symbol;Acc:HGNC:30306]	88.086	119.254	-0.632668	0.000209224	0.019068
ENSG00000147383	NSDHL	NAD(P) dependent steroid dehydrogenase-like [Source:HGNC Symbol;Acc:HGNC:13398]	10.966	16.178	-0.697251	0.000210622	0.019068
ENSG00000130811	EIF3G	eukaryotic translation initiation factor 3 subunit G [Source:HGNC Symbol;Acc:HGNC:3274]	94.656	141.626	-0.756271	0.000205315	0.019068
ENSG00000148303	RPL7A	ribosomal protein L7a [Source:HGNC Symbol;Acc:HGNC:10364]	1319.59	2210.26	-0.94349	0.000199933	0.019068
ENSG00000109814	UGDH	UDP-glucose 6-dehydrogenase [Source:HGNC Symbol;Acc:HGNC:12525]	143.828	298.37	-1.12351	0.000208241	0.019068
ENSG00000205562	AL049775.1		0.704	1.608	-1.43432	0.000208145	0.019068
ENSG00000154928	EPHB1	EPH receptor B1 [Source:HGNC Symbol;Acc:HGNC:3392]	0.314	0.516	-1.67284	0.000203398	0.019068
ENSG00000153162	BMP6	bone morphogenetic protein 6 [Source:HGNC Symbol;Acc:HGNC:1073]	0.108	0.474	-2.38736	0.000205446	0.019068
ENSG00000275896	PRSS2	serine protease 2 [Source:HGNC Symbol;Acc:HGNC:9483]	4770.62	23164.4	-2.48732	0.00020236	0.019068
ENSG00000142541	RPL13A	ribosomal protein L13a [Source:HGNC Symbol;Acc:HGNC:10304]	1180.12	1964.69	-0.963474	0.000213697	0.0191253
ENSG00000108298	RPL19	ribosomal protein L19 [Source:HGNC Symbol;Acc:HGNC:10312]	1350.78	1981.11	-0.728807	0.000217331	0.0191443
ENSG00000234741	GAS5	growth arrest specific 5 (non-protein coding) [Source:HGNC Symbol;Acc:HGNC:16355]	220.834	416.022	-1.04546	0.000217369	0.0191443
ENSG00000159840	ZYX	zyxin [Source:HGNC Symbol;Acc:HGNC:13200]	46.822	70.888	-0.730801	0.000224613	0.0195213
ENSG00000174444	RPL4	ribosomal protein L4 [Source:HGNC Symbol;Acc:HGNC:10353]	1513.87	2363.23	-0.84932	0.000224483	0.0195213
ENSG00000064666	CNN2	calponin 2 [Source:HGNC Symbol;Acc:HGNC:2156]	32.042	47.496	-0.682474	0.000230301	0.0196214
ENSG00000161016	RPL8	ribosomal protein L8 [Source:HGNC Symbol;Acc:HGNC:10368]	746.238	1330.26	-1.0199	0.000230516	0.0196214
ENSG00000197728	RPS26	ribosomal protein S26 [Source:HGNC Symbol;Acc:HGNC:10414]	327.6	458.318	-0.654747	0.000232472	0.019681
ENSG00000035403	VCL	vinculin [Source:HGNC Symbol;Acc:HGNC:12665]	31.156	48.22	-0.778425	0.000236	0.0198722
ENSG00000172809	RPL38	ribosomal protein L38 [Source:HGNC Symbol;Acc:HGNC:10349]	947.752	1319.12	-0.653837	0.000241358	0.0200008
ENSG00000089009	RPL6	ribosomal protein L6 [Source:HGNC Symbol;Acc:HGNC:10362]	845.328	1284.55	-0.772413	0.000241027	0.0200008
ENSG00000142615	CELA2A	chymotrypsin like elastase family member 2A [Source:HGNC Symbol;Acc:HGNC:24609]	171.624	1469.99	-3.60577	0.000240402	0.0200008
ENSG00000122026	RPL21	ribosomal protein L21 [Source:HGNC Symbol;Acc:HGNC:10313]	1185.51	1835.59	-0.865628	0.000246237	0.0201914
ENSG00000073712	FERMT2	fermitin family member 2 [Source:HGNC Symbol;Acc:HGNC:15767]	17.964	28.456	-0.827786	0.000254874	0.0206831
ENSG00000239672	NME1	NME/NM23 nucleoside diphosphate kinase 1 [Source:HGNC Symbol;Acc:HGNC:7849]	46.21	92.49	-1.03299	0.000253584	0.0206831
ENSG00000071282	LMCD1	LIM and cysteine rich domains 1 [Source:HGNC Symbol;Acc:HGNC:6633]	43.444	120.988	-1.65009	0.000267265	0.0214706
ENSG00000233927	RPS28	ribosomal protein S28 [Source:HGNC Symbol;Acc:HGNC:10418]	294.876	420.642	-0.646977	0.000274993	0.0215716
ENSG00000171621	SPSB1	splA/ryanodine receptor domain and SOCS box containing 1 [Source:HGNC Symbol;Acc:HGNC:30628]	23.546	37.422	-0.841737	0.000276564	0.0215716
ENSG00000156515	HK1	hexokinase 1 [Source:HGNC Symbol;Acc:HGNC:4922]	24.152	33.69	-0.629595	0.00028157	0.0217871
ENSG00000084623	EIF3I	eukaryotic translation initiation factor 3 subunit I [Source:HGNC Symbol;Acc:HGNC:3272]	124.862	172.092	-0.641963	0.000283476	0.0217871
ENSG00000204983	PRSS1	serine protease 1 [Source:HGNC Symbol;Acc:HGNC:9475]	3444.59	13999.1	-2.37664	0.00028378	0.0217871
ENSG00000101911	PRPS2	phosphoribosyl pyrophosphate synthetase 2 [Source:HGNC Symbol;Acc:HGNC:9465]	12.994	22.392	-0.808679	0.000289553	0.0219081
ENSG00000048162	NOP16	NOP16 nucleolar protein [Source:HGNC Symbol;Acc:HGNC:26934]	15.746	28.926	-0.961633	0.00028884	0.0219081
ENSG00000008988	RPS20	ribosomal protein S20 [Source:HGNC Symbol;Acc:HGNC:10405]	1017.31	1519.68	-0.774625	0.000294353	0.0221642
ENSG00000075391	RASAL2	RAS protein activator like 2 [Source:HGNC Symbol;Acc:HGNC:9874]	6.748	9.41	-0.55913	0.000317466	0.0222232
ENSG00000125691	RPL23	ribosomal protein L23 [Source:HGNC Symbol;Acc:HGNC:10316]	1209.1	1656.14	-0.633608	0.000317283	0.0222232
ENSG00000167460	TPM4	tropomyosin 4 [Source:HGNC Symbol;Acc:HGNC:12013]	292.99	416.46	-0.677037	0.000328598	0.0222232
ENSG00000145425	RPS3A	ribosomal protein S3A [Source:HGNC Symbol;Acc:HGNC:10421]	1225.3	1720.36	-0.688579	0.00034072	0.0222232
ENSG00000108829	LRRC59	leucine rich repeat containing 59 [Source:HGNC Symbol;Acc:HGNC:28817]	67.648	97.428	-0.690274	0.000302115	0.0222232
ENSG00000079616	KIF22	kinesin family member 22 [Source:HGNC Symbol;Acc:HGNC:6391]	7.21	11.56	-0.705067	0.000306257	0.0222232
ENSG00000198034	RPS4X	ribosomal protein S4, X-linked [Source:HGNC Symbol;Acc:HGNC:10424]	719.466	1041.43	-0.812212	0.000337516	0.0222232
ENSG00000156508	EEF1A1	eukaryotic translation elongation factor 1 alpha 1 [Source:HGNC Symbol;Acc:HGNC:3189]	5791.32	8864.98	-0.813104	0.000339011	0.0222232
ENSG00000145912	NHP2	NHP2 ribonucleoprotein [Source:HGNC Symbol;Acc:HGNC:14377]	66.822	102.926	-0.822736	0.000335754	0.0222232
ENSG00000133216	EPHB2	EPH receptor B2 [Source:HGNC Symbol;Acc:HGNC:3393]	25.718	38.824	-0.832439	0.000316725	0.0222232
ENSG00000214706	IFRD2	interferon related developmental regulator 2 [Source:HGNC Symbol;Acc:HGNC:5457]	21.012	32.892	-0.839764	0.000300068	0.0222232
ENSG00000134285	FKBP11	FK506 binding protein 11 [Source:HGNC Symbol;Acc:HGNC:18624]	39.136	71.032	-0.854697	0.000337799	0.0222232
ENSG00000008394	MGST1	microsomal glutathione S-transferase 1 [Source:HGNC Symbol;Acc:HGNC:7061]	184.956	308.27	-0.895501	0.000325906	0.0222232
ENSG00000113594	LIFR	LIF receptor alpha [Source:HGNC Symbol;Acc:HGNC:6597]	2.128	3.874	-0.920406	0.000342958	0.0222232
ENSG00000167658	EEF2	eukaryotic translation elongation factor 2 [Source:HGNC Symbol;Acc:HGNC:3214]	593.056	1024.12	-0.968028	0.000313929	0.0222232
ENSG00000053372	MRTO4	MRT4 homolog, ribosome maturation factor [Source:HGNC Symbol;Acc:HGNC:18477]	14.642	25.904	-0.969661	0.000308958	0.0222232
ENSG00000160193	WDR4	WD repeat domain 4 [Source:HGNC Symbol;Acc:HGNC:12756]	3.464	5.98	-0.9736	0.000332499	0.0222232
ENSG00000138623	SEMA7A	semaphorin 7A (John Milton Hagen blood group) [Source:HGNC Symbol;Acc:HGNC:10741]	16.536	32.642	-1.04056	0.000306813	0.0222232
ENSG00000109084	TMEM97	transmembrane protein 97 [Source:HGNC Symbol;Acc:HGNC:28106]	19.094	37.068	-1.21039	0.00033948	0.0222232
ENSG00000183092	BEGAIN	brain enriched guanylate kinase associated [Source:HGNC Symbol;Acc:HGNC:24163]	4.978	9.984	-1.22264	0.000312096	0.0222232
ENSG00000177674	AGTRAP	angiotensin II receptor associated protein [Source:HGNC Symbol;Acc:HGNC:13539]	38.052	77.598	-1.27388	0.000310811	0.0222232
ENSG00000099860	GADD45B	growth arrest and DNA damage inducible beta [Source:HGNC Symbol;Acc:HGNC:4096]	25.066	52.142	-1.27468	0.000347636	0.0222232
ENSG00000152689	RASGRP3	RAS guanyl releasing protein 3 [Source:HGNC Symbol;Acc:HGNC:14545]	21.936	49.44	-1.38395	0.000312467	0.0222232
ENSG00000179772	FOXS1	forkhead box S1 [Source:HGNC Symbol;Acc:HGNC:3735]	0.26	1.07	-2.34211	0.000346748	0.0222232
ENSG00000162877	PM20D1	peptidase M20 domain containing 1 [Source:HGNC Symbol;Acc:HGNC:26518]	0.87	4.99	-2.72158	0.000298857	0.0222232
ENSG00000243480	AMY2A	amylase, alpha 2A (pancreatic) [Source:HGNC Symbol;Acc:HGNC:477]	18.164	500.176	-4.99938	0.000335956	0.0222232
ENSG00000248187	AC078850.1		0.984	8.6	-3.61542	0.000350891	0.0223401
ENSG00000198242	RPL23A	ribosomal protein L23a [Source:HGNC Symbol;Acc:HGNC:10317]	439.486	600.406	-0.598646	0.000354841	0.0224806
ENSG00000118181	RPS25	ribosomal protein S25 [Source:HGNC Symbol;Acc:HGNC:10413]	1454.65	2043.49	-0.678791	0.000368888	0.0224806
ENSG00000196588	MKL1	megakaryoblastic leukemia (translocation) 1 [Source:HGNC Symbol;Acc:HGNC:14334]	11.988	18.128	-0.73795	0.000365595	0.0224806
ENSG00000172893	DHCR7	7-dehydrocholesterol reductase [Source:HGNC Symbol;Acc:HGNC:2860]	20.522	32.224	-0.796749	0.000359833	0.0224806
ENSG00000139926	FRMD6	FERM domain containing 6 [Source:HGNC Symbol;Acc:HGNC:19839]	9.37	15.814	-0.871153	0.000365767	0.0224806
ENSG00000137054	POLR1E	RNA polymerase I subunit E [Source:HGNC Symbol;Acc:HGNC:17631]	8.09	15.586	-1.06562	0.000365506	0.0224806
ENSG00000213442	RPL18AP3	ribosomal protein L18a pseudogene 3 [Source:HGNC Symbol;Acc:HGNC:31387]	5.626	11.61	-1.09274	0.000362738	0.0224806
ENSG00000167553	TUBA1C	tubulin alpha 1c [Source:HGNC Symbol;Acc:HGNC:20768]	189.292	471.136	-1.38775	0.000370979	0.0225204
ENSG00000105401	CDC37	cell division cycle 37 [Source:HGNC Symbol;Acc:HGNC:1735]	74.278	94.44	-0.49424	0.000375519	0.022534
ENSG00000100029	PES1	pescadillo ribosomal biogenesis factor 1 [Source:HGNC Symbol;Acc:HGNC:8848]	30.032	44.698	-0.73834	0.000375155	0.022534
ENSG00000232472	EEF1B2P3	eukaryotic translation elongation factor 1 beta 2 pseudogene 3 [Source:HGNC Symbol;Acc:HGNC:3210]	1.758	3.644	-1.27169	0.00037408	0.022534
ENSG00000110700	RPS13	ribosomal protein S13 [Source:HGNC Symbol;Acc:HGNC:10386]	977.41	1398.59	-0.707378	0.000382127	0.0227899
ENSG00000127920	GNG11	G protein subunit gamma 11 [Source:HGNC Symbol;Acc:HGNC:4403]	6.89	10.826	-0.845275	0.000383552	0.0227899
ENSG00000213553	RPLP0P6	ribosomal protein lateral stalk subunit P0 pseudogene 6 [Source:HGNC Symbol;Acc:HGNC:36404]	2.644	4.706	-0.998711	0.000384149	0.0227899
ENSG00000136830	FAM129B	family with sequence similarity 129 member B [Source:HGNC Symbol;Acc:HGNC:25282]	82.756	113.942	-0.615091	0.000392261	0.0229846
ENSG00000105202	FBL	fibrillarin [Source:HGNC Symbol;Acc:HGNC:3599]	76.028	124.396	-0.905315	0.000389539	0.0229846
ENSG00000167118	URM1	ubiquitin related modifier 1 [Source:HGNC Symbol;Acc:HGNC:28378]	27.858	35.438	-0.507025	0.000404365	0.0230391
ENSG00000149273	RPS3	ribosomal protein S3 [Source:HGNC Symbol;Acc:HGNC:10420]	1662.64	2502.19	-0.817615	0.00040453	0.0230391
ENSG00000100311	PDGFB	platelet derived growth factor subunit B [Source:HGNC Symbol;Acc:HGNC:8800]	7.684	12.558	-0.863855	0.000398868	0.0230391
ENSG00000248810	LINC02432	long intergenic non-protein coding RNA 2432 [Source:HGNC Symbol;Acc:HGNC:53363]	3.132	8.06	-1.41074	0.000403252	0.0230391
ENSG00000177119	ANO6	anoctamin 6 [Source:HGNC Symbol;Acc:HGNC:25240]	30.256	38.812	-0.528366	0.000411541	0.0230826
ENSG00000139239	RPL14P1	ribosomal protein L14 pseudogene 1 [Source:HGNC Symbol;Acc:HGNC:31384]	7.388	13.14	-1.07151	0.000408758	0.0230826
ENSG00000117525	F3	coagulation factor III, tissue factor [Source:HGNC Symbol;Acc:HGNC:3541]	70.176	177.86	-1.33377	0.000414137	0.0230826
ENSG00000128052	KDR	kinase insert domain receptor [Source:HGNC Symbol;Acc:HGNC:6307]	1.162	4.15	-2.23362	0.000411065	0.0230826
ENSG00000179751	SYCN	syncollin [Source:HGNC Symbol;Acc:HGNC:18442]	37.078	362.552	-4.37686	0.00041271	0.0230826
ENSG00000111341	MGP	matrix Gla protein [Source:HGNC Symbol;Acc:HGNC:7060]	2.212	9.856	-2.09223	0.00041623	0.023117
ENSG00000146477	SLC22A3	solute carrier family 22 member 3 [Source:HGNC Symbol;Acc:HGNC:10967]	5.508	15.184	-1.49126	0.000425383	0.0231514
ENSG00000227615	AP001324.1		2.142	3.522	-0.963253	0.000437218	0.0234414
ENSG00000111057	KRT18	keratin 18 [Source:HGNC Symbol;Acc:HGNC:6430]	581.934	1322.13	-1.32218	0.000437909	0.0234414
ENSG00000253669	GASAL1	growth arrest associated lncRNA 1 [Source:HGNC Symbol;Acc:HGNC:53461]	0.822	1.87	-1.38199	0.000438535	0.0234414
ENSG00000137970	RPL7P9	ribosomal protein L7 pseudogene 9 [Source:HGNC Symbol;Acc:HGNC:37028]	12.924	21.228	-0.940694	0.000443211	0.0234488
ENSG00000112936	C7	complement C7 [Source:HGNC Symbol;Acc:HGNC:1346]	1.148	16.618	-4.15188	0.000446158	0.0234488
ENSG00000120156	TEK	TEK receptor tyrosine kinase [Source:HGNC Symbol;Acc:HGNC:11724]	0.212	0.902	-2.5113	0.000449781	0.0235601
ENSG00000156482	RPL30	ribosomal protein L30 [Source:HGNC Symbol;Acc:HGNC:10333]	1578.62	2170.73	-0.645113	0.000453718	0.0236871
ENSG00000101665	SMAD7	SMAD family member 7 [Source:HGNC Symbol;Acc:HGNC:6773]	19.082	25.954	-0.582455	0.000457413	0.0237219
ENSG00000105185	PDCD5	programmed cell death 5 [Source:HGNC Symbol;Acc:HGNC:8764]	79.146	105.074	-0.517146	0.000471729	0.023805
ENSG00000158710	TAGLN2	transgelin 2 [Source:HGNC Symbol;Acc:HGNC:11554]	401.636	522.4	-0.546698	0.000497181	0.023805
ENSG00000149136	SSRP1	structure specific recognition protein 1 [Source:HGNC Symbol;Acc:HGNC:11327]	44.7	59.89	-0.591683	0.000479673	0.023805
ENSG00000145741	BTF3	basic transcription factor 3 [Source:HGNC Symbol;Acc:HGNC:1125]	368.932	484.918	-0.592736	0.000484676	0.023805
ENSG00000186468	RPS23	ribosomal protein S23 [Source:HGNC Symbol;Acc:HGNC:10410]	1737.13	2419.44	-0.634549	0.000492964	0.023805
ENSG00000175166	PSMD2	proteasome 26S subunit, non-ATPase 2 [Source:HGNC Symbol;Acc:HGNC:9559]	92.958	133.65	-0.674841	0.000498533	0.023805
ENSG00000070756	PABPC1	poly(A) binding protein cytoplasmic 1 [Source:HGNC Symbol;Acc:HGNC:8554]	348.326	500.004	-0.684404	0.000474678	0.023805
ENSG00000165916	PSMC3	proteasome 26S subunit, ATPase 3 [Source:HGNC Symbol;Acc:HGNC:9549]	115.646	161.77	-0.694767	0.000472842	0.023805
ENSG00000111012	CYP27B1	cytochrome P450 family 27 subfamily B member 1 [Source:HGNC Symbol;Acc:HGNC:2606]	2.252	3.36	-0.722535	0.000497137	0.023805
ENSG00000006327	TNFRSF12A	TNF receptor superfamily member 12A [Source:HGNC Symbol;Acc:HGNC:18152]	139.324	212.706	-0.755265	0.00049247	0.023805
ENSG00000204520	MICA	MHC class I polypeptide-related sequence A [Source:HGNC Symbol;Acc:HGNC:7090]	8.214	12.744	-0.790023	0.000478491	0.023805
ENSG00000112658	SRF	serum response factor [Source:HGNC Symbol;Acc:HGNC:11291]	9.086	15.794	-0.932919	0.000484793	0.023805
ENSG00000233913	RPL10P9	ribosomal protein L10 pseudogene 9 [Source:HGNC Symbol;Acc:HGNC:35579]	3.82	9.152	-1.07055	0.000496671	0.023805
ENSG00000116649	SRM	spermidine synthase [Source:HGNC Symbol;Acc:HGNC:11296]	18.276	40.052	-1.23151	0.000479427	0.023805
ENSG00000114737	CISH	cytokine inducible SH2 containing protein [Source:HGNC Symbol;Acc:HGNC:1984]	4.992	11.094	-1.26606	0.000496721	0.023805
ENSG00000187608	ISG15	ISG15 ubiquitin-like modifier [Source:HGNC Symbol;Acc:HGNC:4053]	25.378	103.922	-2.01738	0.000481969	0.023805
ENSG00000069482	GAL	galanin and GMAP prepropeptide [Source:HGNC Symbol;Acc:HGNC:4114]	1.636	10.146	-2.68249	0.000488068	0.023805
ENSG00000223749	MIR503HG	MIR503 host gene [Source:HGNC Symbol;Acc:HGNC:28258]	0.792	4.574	-2.77498	0.000491302	0.023805
ENSG00000105675	ATP4A	ATPase H+/K+ transporting alpha subunit [Source:HGNC Symbol;Acc:HGNC:819]	0.052	2.354	-5.74676	0.0004811	0.023805
ENSG00000141543	EIF4A3	eukaryotic translation initiation factor 4A3 [Source:HGNC Symbol;Acc:HGNC:18683]	43.234	58.476	-0.592559	0.000505067	0.0238104
ENSG00000142634	EFHD2	EF-hand domain family member D2 [Source:HGNC Symbol;Acc:HGNC:28670]	18.438	26.146	-0.672941	0.000503825	0.0238104
ENSG00000122406	RPL5	ribosomal protein L5 [Source:HGNC Symbol;Acc:HGNC:10360]	873.07	1316.71	-0.805025	0.000506249	0.0238104
ENSG00000256393	RPL41P5	ribosomal protein L41 pseudogene 5 [Source:HGNC Symbol;Acc:HGNC:10355]	0	0	-1.00994	0.000500438	0.0238104
ENSG00000010438	PRSS3	serine protease 3 [Source:HGNC Symbol;Acc:HGNC:9486]	62.04	391.386	-3.04929	0.000510917	0.023958
ENSG00000182004	SNRPE	small nuclear ribonucleoprotein polypeptide E [Source:HGNC Symbol;Acc:HGNC:11161]	66.542	85.168	-0.584408	0.000516763	0.0241597
ENSG00000129824	RPS4Y1	ribosomal protein S4, Y-linked 1 [Source:HGNC Symbol;Acc:HGNC:10425]	147.692	237.018	-0.899078	0.000518302	0.0241597
ENSG00000091704	CPA1	carboxypeptidase A1 [Source:HGNC Symbol;Acc:HGNC:2296]	776.592	6193.67	-3.74096	0.000526547	0.0243698
ENSG00000165757	JCAD	junctional cadherin 5 associated [Source:HGNC Symbol;Acc:HGNC:29283]	5.762	9.058	-0.93516	0.000532264	0.0244467
ENSG00000178035	IMPDH2	inosine monophosphate dehydrogenase 2 [Source:HGNC Symbol;Acc:HGNC:6053]	71.744	132.618	-1.00429	0.000531339	0.0244467
ENSG00000179041	RRS1	ribosome biogenesis regulator homolog [Source:HGNC Symbol;Acc:HGNC:17083]	9.036	18.308	-1.18634	0.000538135	0.0245008
ENSG00000170890	PLA2G1B	phospholipase A2 group IB [Source:HGNC Symbol;Acc:HGNC:9030]	506.514	4960.84	-4.08046	0.000537466	0.0245008
ENSG00000115602	IL1RL1	interleukin 1 receptor like 1 [Source:HGNC Symbol;Acc:HGNC:5998]	0.358	5.252	-3.81798	0.000545073	0.0247448
ENSG00000066379	ZNRD1	zinc ribbon domain containing 1 [Source:HGNC Symbol;Acc:HGNC:13182]	16.942	23.848	-0.658454	0.000554212	0.0250531
ENSG00000099783	HNRNPM	heterogeneous nuclear ribonucleoprotein M [Source:HGNC Symbol;Acc:HGNC:5046]	100.91	156.148	-0.816261	0.000555064	0.0250531
ENSG00000175061	LRRC75A-AS1	LRRC75A antisense RNA 1 [Source:HGNC Symbol;Acc:HGNC:28619]	299.464	404.718	-0.622274	0.000566182	0.0254084
ENSG00000100316	RPL3	ribosomal protein L3 [Source:HGNC Symbol;Acc:HGNC:10332]	1420.71	1942.1	-0.614293	0.000577094	0.0256965
ENSG00000244398	AC116533.1		77.214	154.11	-1.03157	0.000577524	0.0256965
ENSG00000125743	SNRPD2	small nuclear ribonucleoprotein D2 polypeptide [Source:HGNC Symbol;Acc:HGNC:11159]	142.514	190.13	-0.570705	0.000585286	0.0257215
ENSG00000244300	GATA2-AS1	GATA2 antisense RNA 1 [Source:HGNC Symbol;Acc:HGNC:51108]	4.186	6.584	-0.802963	0.000587939	0.0257215
ENSG00000123136	DDX39A	DExD-box helicase 39A [Source:HGNC Symbol;Acc:HGNC:17821]	27.342	40.388	-0.717762	0.000592089	0.0258309
ENSG00000104738	MCM4	minichromosome maintenance complex component 4 [Source:HGNC Symbol;Acc:HGNC:6947]	9.47	12.15	-0.560292	0.000598208	0.0259533
ENSG00000184009	ACTG1	actin gamma 1 [Source:HGNC Symbol;Acc:HGNC:144]	2070.3	4658.67	-1.28551	0.000596944	0.0259533
ENSG00000008018	PSMB1	proteasome subunit beta 1 [Source:HGNC Symbol;Acc:HGNC:9537]	183.35	238.334	-0.529302	0.000607656	0.0260841
ENSG00000112118	MCM3	minichromosome maintenance complex component 3 [Source:HGNC Symbol;Acc:HGNC:6945]	14.528	18.528	-0.529594	0.000612398	0.0260841
ENSG00000132341	RAN	RAN, member RAS oncogene family [Source:HGNC Symbol;Acc:HGNC:9846]	220.33	320.316	-0.653174	0.000604542	0.0260841
ENSG00000169230	PRELID1	PRELI domain containing 1 [Source:HGNC Symbol;Acc:HGNC:30255]	74.086	105.252	-0.662594	0.000606292	0.0260841
ENSG00000198931	APRT	adenine phosphoribosyltransferase [Source:HGNC Symbol;Acc:HGNC:626]	67.606	100.678	-0.678661	0.000615021	0.0260841
ENSG00000233476	EEF1A1P6	eukaryotic translation elongation factor 1 alpha 1 pseudogene 6 [Source:HGNC Symbol;Acc:HGNC:3201]	4.958	7.944	-0.840759	0.00061128	0.0260841
ENSG00000218426	AL590867.2		4.116	6.818	-0.884436	0.000613949	0.0260841
ENSG00000175550	DRAP1	DR1 associated protein 1 [Source:HGNC Symbol;Acc:HGNC:3019]	47.28	61.562	-0.542522	0.000631682	0.02612
ENSG00000134419	RPS15A	ribosomal protein S15a [Source:HGNC Symbol;Acc:HGNC:10389]	1074.92	1515.03	-0.578293	0.00063198	0.02612
ENSG00000113272	THG1L	tRNA-histidine guanylyltransferase 1 like [Source:HGNC Symbol;Acc:HGNC:26053]	6.768	10.178	-0.597856	0.00063724	0.02612
ENSG00000008517	IL32	interleukin 32 [Source:HGNC Symbol;Acc:HGNC:16830]	568.886	776.934	-0.639711	0.00063886	0.02612
ENSG00000007080	CCDC124	coiled-coil domain containing 124 [Source:HGNC Symbol;Acc:HGNC:25171]	33.312	56.108	-0.898401	0.000622693	0.02612
ENSG00000153885	KCTD15	potassium channel tetramerization domain containing 15 [Source:HGNC Symbol;Acc:HGNC:23297]	3.334	5.508	-0.940068	0.000628282	0.02612
ENSG00000196230	TUBB	tubulin beta class I [Source:HGNC Symbol;Acc:HGNC:20778]	237.18	464.56	-1.03932	0.000641378	0.02612
ENSG00000176170	SPHK1	sphingosine kinase 1 [Source:HGNC Symbol;Acc:HGNC:11240]	15.518	31.884	-1.28775	0.000629446	0.02612
ENSG00000104549	SQLE	squalene epoxidase [Source:HGNC Symbol;Acc:HGNC:11279]	23.328	51.51	-1.32694	0.000623278	0.02612
ENSG00000231651	DLG3-AS1	DLG3 antisense RNA 1 [Source:HGNC Symbol;Acc:HGNC:40182]	0.518	2.046	-1.80975	0.000641162	0.02612
ENSG00000250591	PRSS3P1	PRSS3 pseudogene 1 [Source:HGNC Symbol;Acc:HGNC:43787]	0.024	0.668	-2.16046	0.000618973	0.02612
ENSG00000196924	FLNA	filamin A [Source:HGNC Symbol;Acc:HGNC:3754]	133.736	228.486	-0.815843	0.000649759	0.026296
ENSG00000186184	POLR1D	RNA polymerase I subunit D [Source:HGNC Symbol;Acc:HGNC:20422]	68.996	86.326	-0.492338	0.000656494	0.0263641
ENSG00000180817	PPA1	pyrophosphatase (inorganic) 1 [Source:HGNC Symbol;Acc:HGNC:9226]	179.644	232.348	-0.48591	0.000674883	0.0267189
ENSG00000221983	UBA52	ubiquitin A-52 residue ribosomal protein fusion product 1 [Source:HGNC Symbol;Acc:HGNC:12458]	564.366	734.96	-0.546559	0.000685233	0.0267189
ENSG00000174547	MRPL11	mitochondrial ribosomal protein L11 [Source:HGNC Symbol;Acc:HGNC:14042]	17.16	23.126	-0.586026	0.000682453	0.0267189
ENSG00000123064	DDX54	DEAD-box helicase 54 [Source:HGNC Symbol;Acc:HGNC:20084]	16.764	23.034	-0.631917	0.000689212	0.0267189
ENSG00000148120	C9orf3	chromosome 9 open reading frame 3 [Source:HGNC Symbol;Acc:HGNC:1361]	32.106	46.424	-0.695819	0.00068436	0.0267189
ENSG00000168734	PKIG	cAMP-dependent protein kinase inhibitor gamma [Source:HGNC Symbol;Acc:HGNC:9019]	21.962	32.508	-0.706562	0.000686669	0.0267189
ENSG00000161970	RPL26	ribosomal protein L26 [Source:HGNC Symbol;Acc:HGNC:10327]	1825.68	2683.83	-0.709333	0.000684167	0.0267189
ENSG00000119326	CTNNAL1	catenin alpha like 1 [Source:HGNC Symbol;Acc:HGNC:2512]	20.398	31.358	-0.758059	0.000682345	0.0267189
ENSG00000119699	TGFB3	transforming growth factor beta 3 [Source:HGNC Symbol;Acc:HGNC:11769]	6.538	14.126	-1.38037	0.000688071	0.0267189
ENSG00000169347	GP2	glycoprotein 2 [Source:HGNC Symbol;Acc:HGNC:4441]	128.008	595.674	-2.21365	0.000676868	0.0267189
ENSG00000181163	NPM1	nucleophosmin 1 [Source:HGNC Symbol;Acc:HGNC:7910]	899.65	1329.65	-0.721213	0.000691641	0.0267469
ENSG00000164346	NSA2	NSA2, ribosome biogenesis homolog [Source:HGNC Symbol;Acc:HGNC:30728]	76.108	99.254	-0.534805	0.000715806	0.0274982
ENSG00000108518	PFN1	profilin 1 [Source:HGNC Symbol;Acc:HGNC:8881]	231.746	323.01	-0.551823	0.000718153	0.0274982
ENSG00000154914	USP43	ubiquitin specific peptidase 43 [Source:HGNC Symbol;Acc:HGNC:20072]	3.38	5.972	-0.917588	0.000716619	0.0274982
ENSG00000178464	RPL10P16	ribosomal protein L10 pseudogene 16 [Source:HGNC Symbol;Acc:HGNC:36882]	4.038	8.312	-1.1681	0.000717183	0.0274982
ENSG00000077942	FBLN1	fibulin 1 [Source:HGNC Symbol;Acc:HGNC:3600]	1.478	3.85	-1.69506	0.000721246	0.0274982
ENSG00000172482	AGXT	alanine-glyoxylate aminotransferase [Source:HGNC Symbol;Acc:HGNC:341]	0.16	2.572	-4.04563	0.00072998	0.0277499
ENSG00000141429	GALNT1	polypeptide N-acetylgalactosaminyltransferase 1 [Source:HGNC Symbol;Acc:HGNC:4123]	43.958	54.896	-0.436535	0.000732276	0.0277698
ENSG00000187514	PTMA	prothymosin alpha [Source:HGNC Symbol;Acc:HGNC:9623]	921.97	1241.06	-0.621956	0.000739153	0.0278955
ENSG00000087077	TRIP6	thyroid hormone receptor interactor 6 [Source:HGNC Symbol;Acc:HGNC:12311]	25.68	33.91	-0.567117	0.000745078	0.0279425
ENSG00000117411	B4GALT2	beta-1,4-galactosyltransferase 2 [Source:HGNC Symbol;Acc:HGNC:925]	14.956	20.448	-0.617613	0.000745753	0.0279425
ENSG00000176473	WDR25	WD repeat domain 25 [Source:HGNC Symbol;Acc:HGNC:21064]	7.156	20.588	-1.44835	0.000744857	0.0279425
ENSG00000196531	NACA	nascent polypeptide-associated complex alpha subunit [Source:HGNC Symbol;Acc:HGNC:7629]	853.026	1143.78	-0.638291	0.000771567	0.0285366
ENSG00000108107	RPL28	ribosomal protein L28 [Source:HGNC Symbol;Acc:HGNC:10330]	586.922	881.544	-0.797501	0.000776508	0.0285712
ENSG00000189343	RPS2P46	ribosomal protein S2 pseudogene 46 [Source:HGNC Symbol;Acc:HGNC:35839]	2.058	4.258	-1.06819	0.000778217	0.0285712
ENSG00000108561	C1QBP	complement C1q binding protein [Source:HGNC Symbol;Acc:HGNC:1243]	76.624	98.04	-0.530199	0.000789292	0.0286155
ENSG00000164574	GALNT10	polypeptide N-acetylgalactosaminyltransferase 10 [Source:HGNC Symbol;Acc:HGNC:19873]	13.68	21.86	-0.719024	0.000786155	0.0286155
ENSG00000203875	SNHG5	small nucleolar RNA host gene 5 [Source:HGNC Symbol;Acc:HGNC:21026]	351.714	497.944	-0.781815	0.000786773	0.0286155
ENSG00000143179	UCK2	uridine-cytidine kinase 2 [Source:HGNC Symbol;Acc:HGNC:12562]	10.066	15.304	-0.695165	0.000797685	0.0286805
ENSG00000213085	CFAP45	cilia and flagella associated protein 45 [Source:HGNC Symbol;Acc:HGNC:17229]	0.412	0.89	-1.23723	0.000793698	0.0286805
ENSG00000143196	DPT	dermatopontin [Source:HGNC Symbol;Acc:HGNC:3011]	0.65	2.814	-2.25814	0.000802072	0.0286805
ENSG00000100814	CCNB1IP1	cyclin B1 interacting protein 1 [Source:HGNC Symbol;Acc:HGNC:19437]	24.738	35.136	-0.617755	0.000804186	0.0286906
ENSG00000261236	BOP1	block of proliferation 1 [Source:HGNC Symbol;Acc:HGNC:15519]	6.182	12.462	-1.15907	0.00080706	0.0287277
ENSG00000166482	MFAP4	microfibril associated protein 4 [Source:HGNC Symbol;Acc:HGNC:7035]	0.888	2.306	-1.60111	0.000822804	0.0290897
ENSG00000130159	ECSIT	ECSIT signalling integrator [Source:HGNC Symbol;Acc:HGNC:29548]	16.716	23.332	-0.658364	0.000828291	0.0291843
ENSG00000116133	DHCR24	24-dehydrocholesterol reductase [Source:HGNC Symbol;Acc:HGNC:2859]	44.158	63.362	-0.688926	0.000831068	0.0291843
ENSG00000125810	CD93	CD93 molecule [Source:HGNC Symbol;Acc:HGNC:15855]	1.606	7.434	-2.56109	0.000830476	0.0291843
ENSG00000179271	GADD45GIP1	GADD45G interacting protein 1 [Source:HGNC Symbol;Acc:HGNC:29996]	9.332	14.202	-0.775716	0.00083372	0.0292119
ENSG00000104524	PYCR3	pyrroline-5-carboxylate reductase 3 [Source:HGNC Symbol;Acc:HGNC:25846]	2.414	4.022	-0.888915	0.000837516	0.0292748
ENSG00000175215	CTDSP2	CTD small phosphatase 2 [Source:HGNC Symbol;Acc:HGNC:17077]	77.634	100.848	-0.494034	0.000848741	0.0293057
ENSG00000037897	METTL1	methyltransferase like 1 [Source:HGNC Symbol;Acc:HGNC:7030]	9.224	16.328	-0.942618	0.000844398	0.0293057
ENSG00000049540	ELN	elastin [Source:HGNC Symbol;Acc:HGNC:3327]	0.844	2.012	-1.65668	0.000864274	0.0296848
ENSG00000185834	RPL12P4	ribosomal protein L12 pseudogene 4 [Source:HGNC Symbol;Acc:HGNC:16587]	1.09	1.806	-1.06054	0.000867539	0.0297317
ENSG00000110047	EHD1	EH domain containing 1 [Source:HGNC Symbol;Acc:HGNC:3242]	17.55	26.96	-0.790749	0.000879065	0.0297859
ENSG00000106628	POLD2	DNA polymerase delta 2, accessory subunit [Source:HGNC Symbol;Acc:HGNC:9176]	26.742	42.51	-0.861545	0.00088053	0.0297859
ENSG00000125266	EFNB2	ephrin B2 [Source:HGNC Symbol;Acc:HGNC:3227]	3.784	6.232	-0.889083	0.000875493	0.0297859
ENSG00000159261	CLDN14	claudin 14 [Source:HGNC Symbol;Acc:HGNC:2035]	2.152	3.506	-0.904805	0.000874136	0.0297859
ENSG00000075624	ACTB	actin beta [Source:HGNC Symbol;Acc:HGNC:132]	1141.95	2110.12	-0.945808	0.000879159	0.0297859
ENSG00000115590	IL1R2	interleukin 1 receptor type 2 [Source:HGNC Symbol;Acc:HGNC:5994]	2.052	6.468	-1.65998	0.000884812	0.0298422
ENSG00000184216	IRAK1	interleukin 1 receptor associated kinase 1 [Source:HGNC Symbol;Acc:HGNC:6112]	55.246	79.542	-0.665585	0.000892258	0.0298691
ENSG00000132481	TRIM47	tripartite motif containing 47 [Source:HGNC Symbol;Acc:HGNC:19020]	29.92	41.116	-0.708974	0.000893565	0.0298691
ENSG00000160818	GPATCH4	G-patch domain containing 4 [Source:HGNC Symbol;Acc:HGNC:25982]	20.68	30.758	-0.784749	0.000894432	0.0298691
ENSG00000066697	MSANTD3	Myb/SANT DNA binding domain containing 3 [Source:HGNC Symbol;Acc:HGNC:23370]	27.686	36.89	-0.590758	0.000906831	0.0300907
ENSG00000112033	PPARD	peroxisome proliferator activated receptor delta [Source:HGNC Symbol;Acc:HGNC:9235]	21.204	34.456	-0.88109	0.000906516	0.0300907
ENSG00000226702	MIR217HG	MIR217 host gene [Source:HGNC Symbol;Acc:HGNC:50537]	0.924	2.272	-1.62048	0.000910299	0.0301419
ENSG00000115875	SRSF7	serine and arginine rich splicing factor 7 [Source:HGNC Symbol;Acc:HGNC:10789]	62.428	86.416	-0.486129	0.00092381	0.0303603
ENSG00000025772	TOMM34	translocase of outer mitochondrial membrane 34 [Source:HGNC Symbol;Acc:HGNC:15746]	25.474	35.928	-0.676126	0.000924649	0.0303603
ENSG00000077348	EXOSC5	exosome component 5 [Source:HGNC Symbol;Acc:HGNC:24662]	7.316	11.202	-0.780331	0.000920438	0.0303603
ENSG00000132185	FCRLA	Fc receptor like A [Source:HGNC Symbol;Acc:HGNC:18504]	0.344	1.05	-1.62348	0.0009225	0.0303603
ENSG00000204787	REG1CP	regenerating family member 1 gamma, pseudogene [Source:HGNC Symbol;Acc:HGNC:9953]	1.138	6.58	-2.65352	0.000930048	0.0304737
ENSG00000133121	STARD13	StAR related lipid transfer domain containing 13 [Source:HGNC Symbol;Acc:HGNC:19164]	6.396	7.946	-0.445534	0.000932599	0.0304935
ENSG00000197785	ATAD3A	ATPase family, AAA domain containing 3A [Source:HGNC Symbol;Acc:HGNC:25567]	8.9	12.978	-0.678373	0.000953105	0.0309085
ENSG00000177469	CAVIN1	caveolae associated protein 1 [Source:HGNC Symbol;Acc:HGNC:9688]	8.278	13.47	-0.94259	0.00095516	0.0309085
ENSG00000113361	CDH6	cadherin 6 [Source:HGNC Symbol;Acc:HGNC:1765]	10.478	25.006	-1.18357	0.000958058	0.0309384
ENSG00000224631	RPS27AP16	ribosomal protein S27a pseudogene 16 [Source:HGNC Symbol;Acc:HGNC:36855]	13.788	22.526	-0.805655	0.000967289	0.0311722
ENSG00000099624	ATP5F1D	ATP synthase F1 subunit delta [Source:HGNC Symbol;Acc:HGNC:837]	38.27	55.078	-0.778575	0.000970951	0.0312259
ENSG00000225663	MCRIP1	MAPK regulated corepressor interacting protein 1 [Source:HGNC Symbol;Acc:HGNC:28007]	33.874	54.97	-0.780179	0.000975901	0.0313208
ENSG00000165526	RPUSD4	RNA pseudouridylate synthase domain containing 4 [Source:HGNC Symbol;Acc:HGNC:25898]	9.998	12.132	-0.560736	0.000983718	0.0314428
ENSG00000185043	CIB1	calcium and integrin binding 1 [Source:HGNC Symbol;Acc:HGNC:16920]	103.064	139.37	-0.604509	0.000992435	0.0314852
ENSG00000196754	S100A2	S100 calcium binding protein A2 [Source:HGNC Symbol;Acc:HGNC:10492]	3.768	8.8	-1.30431	0.000990246	0.0314852
ENSG00000089289	IGBP1	immunoglobulin binding protein 1 [Source:HGNC Symbol;Acc:HGNC:5461]	35.588	46.356	-0.562946	0.00100033	0.0316508
ENSG00000135587	SMPD2	sphingomyelin phosphodiesterase 2 [Source:HGNC Symbol;Acc:HGNC:11121]	6.858	8.88	-0.564692	0.00100258	0.031658
ENSG00000137801	THBS1	thrombospondin 1 [Source:HGNC Symbol;Acc:HGNC:11785]	36.55	108.48	-1.93966	0.00101166	0.0318165
ENSG00000100823	APEX1	apurinic/apyrimidinic endodeoxyribonuclease 1 [Source:HGNC Symbol;Acc:HGNC:587]	99.902	121.776	-0.490754	0.00102019	0.031826
ENSG00000106153	CHCHD2	coiled-coil-helix-coiled-coil-helix domain containing 2 [Source:HGNC Symbol;Acc:HGNC:21645]	258.992	335.938	-0.547682	0.00102066	0.031826
ENSG00000110880	CORO1C	coronin 1C [Source:HGNC Symbol;Acc:HGNC:2254]	36.69	60.34	-0.730677	0.00103119	0.031826
ENSG00000170515	PA2G4	proliferation-associated 2G4 [Source:HGNC Symbol;Acc:HGNC:8550]	68.582	106.898	-0.754241	0.00102365	0.031826
ENSG00000235174	RPL39P3	ribosomal protein L39 pseudogene 3 [Source:HGNC Symbol;Acc:HGNC:21383]	367.102	652.75	-0.890663	0.00103066	0.031826
ENSG00000126709	IFI6	interferon alpha inducible protein 6 [Source:HGNC Symbol;Acc:HGNC:4054]	69.788	165.146	-1.45168	0.00103427	0.031826
ENSG00000130600	H19	H19, imprinted maternally expressed transcript (non-protein coding) [Source:HGNC Symbol;Acc:HGNC:4713]	18.636	44.538	-1.45595	0.00101987	0.031826
ENSG00000136938	ANP32B	acidic nuclear phosphoprotein 32 family member B [Source:HGNC Symbol;Acc:HGNC:16677]	67.924	92.338	-0.59302	0.00106338	0.0319058
ENSG00000090273	NUDC	nuclear distribution C, dynein complex regulator [Source:HGNC Symbol;Acc:HGNC:8045]	59.612	83.494	-0.660336	0.00105519	0.0319058
ENSG00000135454	B4GALNT1	beta-1,4-N-acetyl-galactosaminyltransferase 1 [Source:HGNC Symbol;Acc:HGNC:4117]	1.14	1.506	-0.729507	0.0010583	0.0319058
ENSG00000125835	SNRPB	small nuclear ribonucleoprotein polypeptides B and B1 [Source:HGNC Symbol;Acc:HGNC:11153]	81.438	120.832	-0.730154	0.00106777	0.0319058
ENSG00000102007	PLP2	proteolipid protein 2 [Source:HGNC Symbol;Acc:HGNC:9087]	115.458	180.776	-0.777514	0.00105879	0.0319058
ENSG00000065183	WDR3	WD repeat domain 3 [Source:HGNC Symbol;Acc:HGNC:12755]	12.17	19.992	-0.799019	0.00106222	0.0319058
ENSG00000221869	CEBPD	CCAAT/enhancer binding protein delta [Source:HGNC Symbol;Acc:HGNC:1835]	16.974	26.594	-0.812907	0.0010695	0.0319058
ENSG00000134531	EMP1	epithelial membrane protein 1 [Source:HGNC Symbol;Acc:HGNC:3333]	21.42	39.226	-1.1808	0.00104634	0.0319058
ENSG00000223756	TSSC2	tumor suppressing subtransferable candidate 2 pseudogene [Source:HGNC Symbol;Acc:HGNC:12384]	1.01	2.342	-1.33462	0.00107834	0.0320473
ENSG00000126457	PRMT1	protein arginine methyltransferase 1 [Source:HGNC Symbol;Acc:HGNC:5187]	74.1	102.29	-0.634281	0.00108264	0.0321144
ENSG00000163584	RPL22L1	ribosomal protein L22 like 1 [Source:HGNC Symbol;Acc:HGNC:27610]	50.728	84.968	-0.845203	0.00108609	0.0321557
ENSG00000162438	CTRC	chymotrypsin C [Source:HGNC Symbol;Acc:HGNC:2523]	128.47	584.684	-3.18885	0.00109274	0.0322307
ENSG00000164171	ITGA2	integrin subunit alpha 2 [Source:HGNC Symbol;Acc:HGNC:6137]	48.81	88.022	-0.982063	0.00109885	0.0322321
ENSG00000075415	SLC25A3	solute carrier family 25 member 3 [Source:HGNC Symbol;Acc:HGNC:10989]	290.376	376.882	-0.484211	0.00110478	0.0323421
ENSG00000110660	SLC35F2	solute carrier family 35 member F2 [Source:HGNC Symbol;Acc:HGNC:23615]	8.74	10.846	-0.506791	0.00111218	0.0323898
ENSG00000108688	CCL7	C-C motif chemokine ligand 7 [Source:HGNC Symbol;Acc:HGNC:10634]	2.008	7.03	-1.86215	0.00111387	0.0323898
ENSG00000100911	PSME2	proteasome activator subunit 2 [Source:HGNC Symbol;Acc:HGNC:9569]	172.762	228.002	-0.493781	0.00113362	0.0325077
ENSG00000132676	DAP3	death associated protein 3 [Source:HGNC Symbol;Acc:HGNC:2673]	59.97	75.712	-0.516947	0.00112304	0.0325077
ENSG00000163468	CCT3	chaperonin containing TCP1 subunit 3 [Source:HGNC Symbol;Acc:HGNC:1616]	115.004	146.538	-0.530335	0.00113328	0.0325077
ENSG00000185627	PSMD13	proteasome 26S subunit, non-ATPase 13 [Source:HGNC Symbol;Acc:HGNC:9558]	68.91	90.8	-0.553124	0.00114171	0.0325077
ENSG00000175792	RUVBL1	RuvB like AAA ATPase 1 [Source:HGNC Symbol;Acc:HGNC:10474]	14.388	19.602	-0.584029	0.00114572	0.0325077
ENSG00000284713	AP003071.5		0.336	0.784	-1.24092	0.00113318	0.0325077
ENSG00000153002	CPB1	carboxypeptidase B1 [Source:HGNC Symbol;Acc:HGNC:2299]	825.656	2772.94	-2.43403	0.00114561	0.0325077
ENSG00000132768	DPH2	DPH2 homolog [Source:HGNC Symbol;Acc:HGNC:3004]	14.13	21.968	-0.797741	0.00115794	0.0327357
ENSG00000142623	PADI1	peptidyl arginine deiminase 1 [Source:HGNC Symbol;Acc:HGNC:18367]	0.434	0.932	-1.38576	0.001156	0.0327357
ENSG00000074201	CLNS1A	chloride nucleotide-sensitive channel 1A [Source:HGNC Symbol;Acc:HGNC:2080]	54.304	68.082	-0.48251	0.00118248	0.0331686
ENSG00000166333	ILK	integrin linked kinase [Source:HGNC Symbol;Acc:HGNC:6040]	63.528	81.148	-0.505963	0.00118491	0.0331686
ENSG00000142534	RPS11	ribosomal protein S11 [Source:HGNC Symbol;Acc:HGNC:10384]	2202.02	2814.96	-0.534297	0.00118115	0.0331686
ENSG00000116221	MRPL37	mitochondrial ribosomal protein L37 [Source:HGNC Symbol;Acc:HGNC:14034]	34.026	41.394	-0.448662	0.00119487	0.033253
ENSG00000130598	TNNI2	troponin I2, fast skeletal type [Source:HGNC Symbol;Acc:HGNC:11946]	1.31	2.3	-1.11153	0.00120514	0.0333478
ENSG00000175467	SART1	SART1, U4/U6.U5 tri-snRNP-associated protein 1 [Source:HGNC Symbol;Acc:HGNC:10538]	14.36	18.676	-0.509449	0.00121811	0.0336162
ENSG00000060138	YBX3	Y-box binding protein 3 [Source:HGNC Symbol;Acc:HGNC:2428]	97.904	130.108	-0.559499	0.00122732	0.0337649
ENSG00000125740	FOSB	FosB proto-oncogene, AP-1 transcription factor subunit [Source:HGNC Symbol;Acc:HGNC:3797]	1.548	2.834	-1.02291	0.00123248	0.0338058
ENSG00000072506	HSD17B10	hydroxysteroid 17-beta dehydrogenase 10 [Source:HGNC Symbol;Acc:HGNC:4800]	46.066	59.018	-0.514734	0.00125038	0.0340549
ENSG00000148840	PPRC1	peroxisome proliferator-activated receptor gamma, coactivator-related 1 [Source:HGNC Symbol;Acc:HGNC:30025]	8.78	13.834	-0.690851	0.00124822	0.0340549
ENSG00000185650	ZFP36L1	ZFP36 ring finger protein like 1 [Source:HGNC Symbol;Acc:HGNC:1107]	120.564	175.162	-0.655067	0.00125832	0.0341557
ENSG00000177954	RPS27	ribosomal protein S27 [Source:HGNC Symbol;Acc:HGNC:10416]	4423.28	6016.97	-0.62768	0.00126816	0.0343038
ENSG00000172023	REG1B	regenerating family member 1 beta [Source:HGNC Symbol;Acc:HGNC:9952]	6020.57	20053.2	-2.76961	0.0012758	0.0344139
ENSG00000134954	ETS1	ETS proto-oncogene 1, transcription factor [Source:HGNC Symbol;Acc:HGNC:3488]	31.022	53.268	-0.978589	0.00128378	0.0345474
ENSG00000074800	ENO1	enolase 1 [Source:HGNC Symbol;Acc:HGNC:3350]	868.024	1255.55	-0.707637	0.00129235	0.0346011
ENSG00000130706	ADRM1	adhesion regulating molecule 1 [Source:HGNC Symbol;Acc:HGNC:15759]	42.99	56.208	-0.574203	0.00129825	0.0346202
ENSG00000178860	MSC	musculin [Source:HGNC Symbol;Acc:HGNC:7321]	25.696	46.73	-1.29704	0.00130377	0.0346684
ENSG00000139428	MMAB	methylmalonic aciduria (cobalamin deficiency) cblB type [Source:HGNC Symbol;Acc:HGNC:19331]	24.078	34.888	-0.547972	0.00131226	0.0346807
ENSG00000171453	POLR1C	RNA polymerase I subunit C [Source:HGNC Symbol;Acc:HGNC:20194]	21.876	28.756	-0.549339	0.00131867	0.0346807
ENSG00000090621	PABPC4	poly(A) binding protein cytoplasmic 4 [Source:HGNC Symbol;Acc:HGNC:8557]	60.14	91.856	-0.732456	0.0013161	0.0346807
ENSG00000186765	FSCN2	fascin actin-bundling protein 2, retinal [Source:HGNC Symbol;Acc:HGNC:3960]	0.786	1.816	-0.935042	0.00131486	0.0346807
ENSG00000137309	HMGA1	high mobility group AT-hook 1 [Source:HGNC Symbol;Acc:HGNC:5010]	54.476	117.542	-1.1579	0.00131665	0.0346807
ENSG00000178821	TMEM52	transmembrane protein 52 [Source:HGNC Symbol;Acc:HGNC:27916]	1.366	4.27	-1.87061	0.00132195	0.0346807
ENSG00000105974	CAV1	caveolin 1 [Source:HGNC Symbol;Acc:HGNC:1527]	9.774	16.702	-0.861009	0.00132453	0.0346903
ENSG00000140263	SORD	sorbitol dehydrogenase [Source:HGNC Symbol;Acc:HGNC:11184]	40.372	54.448	-0.607687	0.00133538	0.0349162
ENSG00000171530	TBCA	tubulin folding cofactor A [Source:HGNC Symbol;Acc:HGNC:11579]	167.898	197.616	-0.406357	0.0013518	0.0349371
ENSG00000167508	MVD	mevalonate diphosphate decarboxylase [Source:HGNC Symbol;Acc:HGNC:7529]	19.536	29.658	-0.824379	0.00135452	0.0349497
ENSG00000149100	EIF3M	eukaryotic translation initiation factor 3 subunit M [Source:HGNC Symbol;Acc:HGNC:24460]	157.626	220.98	-0.643096	0.00135789	0.0349792
ENSG00000139668	WDFY2	WD repeat and FYVE domain containing 2 [Source:HGNC Symbol;Acc:HGNC:20482]	4.592	6.532	-0.541492	0.00136643	0.0350057
ENSG00000125912	NCLN	nicalin [Source:HGNC Symbol;Acc:HGNC:26923]	13.066	23.308	-0.916699	0.0013708	0.0350057
ENSG00000185467	KPNA7	karyopherin subunit alpha 7 [Source:HGNC Symbol;Acc:HGNC:21839]	1.822	5.26	-1.53398	0.00137003	0.0350057
ENSG00000168925	CTRB1	chymotrypsinogen B1 [Source:HGNC Symbol;Acc:HGNC:2521]	2424.96	9180.9	-2.49964	0.00136671	0.0350057
ENSG00000100865	CINP	cyclin dependent kinase 2 interacting protein [Source:HGNC Symbol;Acc:HGNC:23789]	23.51	29.638	-0.452932	0.00138469	0.0350271
ENSG00000099337	KCNK6	potassium two pore domain channel subfamily K member 6 [Source:HGNC Symbol;Acc:HGNC:6281]	3.4	4.3	-0.528702	0.00139947	0.0350271
ENSG00000197451	HNRNPAB	heterogeneous nuclear ribonucleoprotein A/B [Source:HGNC Symbol;Acc:HGNC:5034]	73.848	96.232	-0.537515	0.00139597	0.0350271
ENSG00000198832	SELENOM	selenoprotein M [Source:HGNC Symbol;Acc:HGNC:30397]	50.26	67.518	-0.567952	0.00138948	0.0350271
ENSG00000106263	EIF3B	eukaryotic translation initiation factor 3 subunit B [Source:HGNC Symbol;Acc:HGNC:3280]	59.658	79.328	-0.635788	0.00138607	0.0350271
ENSG00000183298	RPSAP19	ribosomal protein SA pseudogene 19 [Source:HGNC Symbol;Acc:HGNC:36508]	0.138	0.254	-0.941008	0.0013935	0.0350271
ENSG00000237643	AL365226.2		13.606	31.08	-1.2445	0.00140448	0.0350271
ENSG00000168928	CTRB2	chymotrypsinogen B2 [Source:HGNC Symbol;Acc:HGNC:2522]	2043.43	8088.19	-2.36406	0.0013869	0.0350271
ENSG00000131876	SNRPA1	small nuclear ribonucleoprotein polypeptide A' [Source:HGNC Symbol;Acc:HGNC:11152]	37.544	53.216	-0.626133	0.00140712	0.035037
ENSG00000275700	AATF	apoptosis antagonizing transcription factor [Source:HGNC Symbol;Acc:HGNC:19235]	24.432	32.146	-0.550647	0.00141896	0.0350889
ENSG00000130726	TRIM28	tripartite motif containing 28 [Source:HGNC Symbol;Acc:HGNC:16384]	122.79	142.678	-0.424761	0.00142785	0.0351482
ENSG00000139637	C12orf10	chromosome 12 open reading frame 10 [Source:HGNC Symbol;Acc:HGNC:17590]	20.366	25.414	-0.500015	0.0014284	0.0351482
ENSG00000071626	DAZAP1	DAZ associated protein 1 [Source:HGNC Symbol;Acc:HGNC:2683]	31.99	44.7	-0.660743	0.00143579	0.0352467
ENSG00000136149	RPL13AP25	ribosomal protein L13a pseudogene 25 [Source:HGNC Symbol;Acc:HGNC:36981]	0.436	0.632	-0.958475	0.00144666	0.0354578
ENSG00000119705	SLIRP	SRA stem-loop interacting RNA binding protein [Source:HGNC Symbol;Acc:HGNC:20495]	123.548	161.946	-0.512553	0.00145196	0.0354768
ENSG00000156463	SH3RF2	SH3 domain containing ring finger 2 [Source:HGNC Symbol;Acc:HGNC:26299]	2.654	5.652	-1.35703	0.00145016	0.0354768
ENSG00000065427	KARS	lysyl-tRNA synthetase [Source:HGNC Symbol;Acc:HGNC:6215]	73.208	90.06	-0.467703	0.00145749	0.035544
ENSG00000275832	ARHGAP23	Rho GTPase activating protein 23 [Source:HGNC Symbol;Acc:HGNC:29293]	2.684	3.472	-0.639492	0.00145925	0.035544
ENSG00000142546	NOSIP	nitric oxide synthase interacting protein [Source:HGNC Symbol;Acc:HGNC:17946]	26.962	33.396	-0.477484	0.00147438	0.0357723
ENSG00000099901	RANBP1	RAN binding protein 1 [Source:HGNC Symbol;Acc:HGNC:9847]	33.284	42.594	-0.507554	0.00148487	0.0357723
ENSG00000102900	NUP93	nucleoporin 93 [Source:HGNC Symbol;Acc:HGNC:28958]	19.832	25.99	-0.571782	0.00147874	0.0357723
ENSG00000117395	EBNA1BP2	EBNA1 binding protein 2 [Source:HGNC Symbol;Acc:HGNC:15531]	38.332	59.298	-0.764821	0.00147721	0.0357723
ENSG00000170421	KRT8	keratin 8 [Source:HGNC Symbol;Acc:HGNC:6446]	1013.03	1979.88	-1.12534	0.00148349	0.0357723
ENSG00000104522	TSTA3	tissue specific transplantation antigen P35B [Source:HGNC Symbol;Acc:HGNC:12390]	34.128	40.17	-0.419695	0.00150014	0.0359751
ENSG00000175772	LINC01106	long intergenic non-protein coding RNA 1106 [Source:HGNC Symbol;Acc:HGNC:26769]	8.524	14.268	-0.912188	0.00150451	0.0359751
ENSG00000170011	MYRIP	myosin VIIA and Rab interacting protein [Source:HGNC Symbol;Acc:HGNC:19156]	0.818	1.286	-0.797364	0.00151732	0.0361709
ENSG00000162302	RPS6KA4	ribosomal protein S6 kinase A4 [Source:HGNC Symbol;Acc:HGNC:10433]	8.412	13.182	-0.828009	0.00151518	0.0361709
ENSG00000056558	TRAF1	TNF receptor associated factor 1 [Source:HGNC Symbol;Acc:HGNC:12031]	4.824	10.038	-1.14318	0.00152006	0.0361811
ENSG00000081277	PKP1	plakophilin 1 [Source:HGNC Symbol;Acc:HGNC:9023]	0.238	0.616	-1.58025	0.00152607	0.0362141
ENSG00000147155	EBP	emopamil binding protein (sterol isomerase) [Source:HGNC Symbol;Acc:HGNC:3133]	25.102	38.322	-0.728884	0.00153281	0.0363009
ENSG00000177464	GPR4	G protein-coupled receptor 4 [Source:HGNC Symbol;Acc:HGNC:4497]	0.444	1.792	-2.28931	0.00153436	0.0363009
ENSG00000168884	TNIP2	TNFAIP3 interacting protein 2 [Source:HGNC Symbol;Acc:HGNC:19118]	16.57	19.04	-0.411243	0.00155162	0.0364218
ENSG00000012061	ERCC1	ERCC excision repair 1, endonuclease non-catalytic subunit [Source:HGNC Symbol;Acc:HGNC:3433]	22.128	29.26	-0.566313	0.00155044	0.0364218
ENSG00000115053	NCL	nucleolin [Source:HGNC Symbol;Acc:HGNC:7667]	197.582	304.882	-0.7287	0.0015538	0.0364218
ENSG00000114771	AADAC	arylacetamide deacetylase [Source:HGNC Symbol;Acc:HGNC:17]	13.746	135.248	-3.01558	0.00155076	0.0364218
ENSG00000103550	KNOP1	lysine rich nucleolar protein 1 [Source:HGNC Symbol;Acc:HGNC:34404]	16.822	18.414	-0.476771	0.00158365	0.0364504
ENSG00000130165	ELOF1	elongation factor 1 homolog [Source:HGNC Symbol;Acc:HGNC:28691]	41.338	51.08	-0.488817	0.00161033	0.0364504
ENSG00000137767	SQOR	sulfide quinone oxidoreductase [Source:HGNC Symbol;Acc:HGNC:20390]	69.334	86.284	-0.498664	0.00156986	0.0364504
ENSG00000106028	SSBP1	single stranded DNA binding protein 1 [Source:HGNC Symbol;Acc:HGNC:11317]	146.858	188.744	-0.511725	0.0016034	0.0364504
ENSG00000126561	STAT5A	signal transducer and activator of transcription 5A [Source:HGNC Symbol;Acc:HGNC:11366]	6.666	8.352	-0.520727	0.00158791	0.0364504
ENSG00000184178	SCFD2	sec1 family domain containing 2 [Source:HGNC Symbol;Acc:HGNC:30676]	4.696	6.506	-0.605902	0.00158268	0.0364504
ENSG00000197989	SNHG12	small nucleolar RNA host gene 12 [Source:HGNC Symbol;Acc:HGNC:30062]	14.916	20.184	-0.608136	0.00160101	0.0364504
ENSG00000100522	GNPNAT1	glucosamine-phosphate N-acetyltransferase 1 [Source:HGNC Symbol;Acc:HGNC:19980]	17.574	26.938	-0.695339	0.00157645	0.0364504
ENSG00000076662	ICAM3	intercellular adhesion molecule 3 [Source:HGNC Symbol;Acc:HGNC:5346]	2.278	3.354	-0.700948	0.00156583	0.0364504
ENSG00000197956	S100A6	S100 calcium binding protein A6 [Source:HGNC Symbol;Acc:HGNC:10496]	1672.3	2907.07	-0.784849	0.0016064	0.0364504
ENSG00000100302	RASD2	RASD family member 2 [Source:HGNC Symbol;Acc:HGNC:18229]	0.516	0.89	-0.943283	0.00156807	0.0364504
ENSG00000215030	RPL13P12	ribosomal protein L13 pseudogene 12 [Source:HGNC Symbol;Acc:HGNC:35701]	7.22	12.32	-0.964795	0.00157805	0.0364504
ENSG00000038295	TLL1	tolloid like 1 [Source:HGNC Symbol;Acc:HGNC:11843]	1.018	2.004	-1.04505	0.00159759	0.0364504
ENSG00000224945	AL353150.1		1.632	4.166	-1.36981	0.00161464	0.0364504
ENSG00000224578	HNRNPA1P48	heterogeneous nuclear ribonucleoprotein A1 pseudogene 48 [Source:HGNC Symbol;Acc:HGNC:48778]	5.088	13.13	-1.37418	0.00160245	0.0364504
ENSG00000107562	CXCL12	C-X-C motif chemokine ligand 12 [Source:HGNC Symbol;Acc:HGNC:10672]	8.176	20.012	-1.40334	0.00157295	0.0364504
ENSG00000114446	IFT57	intraflagellar transport 57 [Source:HGNC Symbol;Acc:HGNC:17367]	37.836	47.05	-0.456026	0.00162558	0.0365101
ENSG00000214114	MYCBP	MYC binding protein [Source:HGNC Symbol;Acc:HGNC:7554]	9.954	14.034	-0.668162	0.00162121	0.0365101
ENSG00000130826	DKC1	dyskerin pseudouridine synthase 1 [Source:HGNC Symbol;Acc:HGNC:2890]	23.762	39.016	-0.845185	0.00162713	0.0365101
ENSG00000087269	NOP14	NOP14 nucleolar protein [Source:HGNC Symbol;Acc:HGNC:16821]	13.466	19.434	-0.659372	0.00162968	0.0365118
ENSG00000183207	RUVBL2	RuvB like AAA ATPase 2 [Source:HGNC Symbol;Acc:HGNC:10475]	22.636	33.456	-0.699369	0.00163186	0.0365118
ENSG00000152082	MZT2B	mitotic spindle organizing protein 2B [Source:HGNC Symbol;Acc:HGNC:25886]	50.69	62.144	-0.594015	0.00164396	0.0367122
ENSG00000127824	TUBA4A	tubulin alpha 4a [Source:HGNC Symbol;Acc:HGNC:12407]	85.404	171.396	-1.16715	0.00164551	0.0367122
ENSG00000198498	TMA16	translation machinery associated 16 homolog [Source:HGNC Symbol;Acc:HGNC:25638]	11.068	16.088	-0.619631	0.00165062	0.0367223
ENSG00000164024	METAP1	methionyl aminopeptidase 1 [Source:HGNC Symbol;Acc:HGNC:15789]	23.538	30.078	-0.437377	0.00168521	0.0369661
ENSG00000166226	CCT2	chaperonin containing TCP1 subunit 2 [Source:HGNC Symbol;Acc:HGNC:1615]	102.756	127.024	-0.471614	0.00168346	0.0369661
ENSG00000176887	SOX11	SRY-box 11 [Source:HGNC Symbol;Acc:HGNC:11191]	0.098	0.248	-1.42393	0.00169021	0.0370239
ENSG00000163191	S100A11	S100 calcium binding protein A11 [Source:HGNC Symbol;Acc:HGNC:10488]	1207.97	1506.61	-0.487316	0.00170651	0.0371469
ENSG00000174748	RPL15	ribosomal protein L15 [Source:HGNC Symbol;Acc:HGNC:10306]	1158.24	1587.97	-0.549965	0.00170113	0.0371469
ENSG00000137818	RPLP1	ribosomal protein lateral stalk subunit P1 [Source:HGNC Symbol;Acc:HGNC:10372]	835.318	1123.85	-0.570217	0.0017311	0.0371469
ENSG00000072110	ACTN1	actinin alpha 1 [Source:HGNC Symbol;Acc:HGNC:163]	68.692	89.712	-0.598844	0.00171558	0.0371469
ENSG00000086189	DIMT1	DIM1 dimethyladenosine transferase 1 homolog [Source:HGNC Symbol;Acc:HGNC:30217]	11.942	16.786	-0.616742	0.00172453	0.0371469
ENSG00000189372	AL034369.1		2.622	5.242	-1.13839	0.0017349	0.0371469
ENSG00000273760	AC245041.1		0.66	1.384	-1.24991	0.0017019	0.0371469
ENSG00000059378	PARP12	poly(ADP-ribose) polymerase family member 12 [Source:HGNC Symbol;Acc:HGNC:21919]	23.186	27.776	-0.430323	0.00184176	0.0372831
ENSG00000108559	NUP88	nucleoporin 88 [Source:HGNC Symbol;Acc:HGNC:8067]	30.832	37.132	-0.447334	0.00182196	0.0372831
ENSG00000087191	PSMC5	proteasome 26S subunit, ATPase 5 [Source:HGNC Symbol;Acc:HGNC:9552]	94.352	115.782	-0.455873	0.00185226	0.0372831
ENSG00000160799	CCDC12	coiled-coil domain containing 12 [Source:HGNC Symbol;Acc:HGNC:28332]	33.302	42.918	-0.475739	0.00181075	0.0372831
ENSG00000213719	CLIC1	chloride intracellular channel 1 [Source:HGNC Symbol;Acc:HGNC:2062]	279.04	354.474	-0.491695	0.00185591	0.0372831
ENSG00000277791	PSMB3	proteasome subunit beta 3 [Source:HGNC Symbol;Acc:HGNC:9540]	109.872	144.408	-0.52303	0.00182006	0.0372831
ENSG00000242372	EIF6	eukaryotic translation initiation factor 6 [Source:HGNC Symbol;Acc:HGNC:6159]	115.002	149.45	-0.529858	0.00183452	0.0372831
ENSG00000092841	MYL6	myosin light chain 6 [Source:HGNC Symbol;Acc:HGNC:7587]	2307.29	3157.8	-0.538061	0.00179718	0.0372831
ENSG00000132196	HSD17B7	hydroxysteroid 17-beta dehydrogenase 7 [Source:HGNC Symbol;Acc:HGNC:5215]	10.702	14.178	-0.544775	0.00186207	0.0372831
ENSG00000042088	TDP1	tyrosyl-DNA phosphodiesterase 1 [Source:HGNC Symbol;Acc:HGNC:18884]	6.854	8.908	-0.552379	0.00183656	0.0372831
ENSG00000198522	GPN1	GPN-loop GTPase 1 [Source:HGNC Symbol;Acc:HGNC:17030]	26.276	34.936	-0.559214	0.00183751	0.0372831
ENSG00000100764	PSMC1	proteasome 26S subunit, ATPase 1 [Source:HGNC Symbol;Acc:HGNC:9547]	136.548	181.818	-0.568911	0.00178734	0.0372831
ENSG00000163636	PSMD6	proteasome 26S subunit, non-ATPase 6 [Source:HGNC Symbol;Acc:HGNC:9564]	61.216	80.938	-0.596434	0.0018502	0.0372831
ENSG00000166825	ANPEP	alanyl aminopeptidase, membrane [Source:HGNC Symbol;Acc:HGNC:500]	146.478	191.176	-0.599854	0.0018588	0.0372831
ENSG00000204356	NELFE	negative elongation factor complex member E [Source:HGNC Symbol;Acc:HGNC:13974]	39.39	54.142	-0.613651	0.00175734	0.0372831
ENSG00000196843	ARID5A	AT-rich interaction domain 5A [Source:HGNC Symbol;Acc:HGNC:17361]	8.102	11.556	-0.625148	0.00181036	0.0372831
ENSG00000156697	UTP14A	UTP14A, small subunit processome component [Source:HGNC Symbol;Acc:HGNC:10665]	9.318	13.416	-0.661646	0.00178558	0.0372831
ENSG00000100345	MYH9	myosin heavy chain 9 [Source:HGNC Symbol;Acc:HGNC:7579]	162.206	258.182	-0.793985	0.00177722	0.0372831
ENSG00000279483	AC090498.1		0	0	-0.801348	0.00180743	0.0372831
ENSG00000187699	C2orf88	chromosome 2 open reading frame 88 [Source:HGNC Symbol;Acc:HGNC:28191]	2.39	4.3	-0.813873	0.00177103	0.0372831
ENSG00000100665	SERPINA4	serpin family A member 4 [Source:HGNC Symbol;Acc:HGNC:8948]	34.462	57.76	-0.889009	0.00186378	0.0372831
ENSG00000263266	RPS7P1	ribosomal protein S7 pseudogene 1 [Source:HGNC Symbol;Acc:HGNC:17081]	1.956	3.324	-0.950788	0.00183311	0.0372831
ENSG00000264281	AC016596.2		0	0	-0.956162	0.00182608	0.0372831
ENSG00000277013	AC008556.1		0.518	0.958	-1.03082	0.00175921	0.0372831
ENSG00000112499	SLC22A2	solute carrier family 22 member 2 [Source:HGNC Symbol;Acc:HGNC:10966]	0.346	0.642	-1.12099	0.00174995	0.0372831
ENSG00000237506	RPSAP15	ribosomal protein SA pseudogene 15 [Source:HGNC Symbol;Acc:HGNC:31464]	0.738	1.506	-1.2075	0.00184931	0.0372831
ENSG00000131016	AKAP12	A-kinase anchoring protein 12 [Source:HGNC Symbol;Acc:HGNC:370]	11.788	26.444	-1.28613	0.00183488	0.0372831
ENSG00000186480	INSIG1	insulin induced gene 1 [Source:HGNC Symbol;Acc:HGNC:6083]	41.746	91.904	-1.30043	0.00177846	0.0372831
ENSG00000175793	SFN	stratifin [Source:HGNC Symbol;Acc:HGNC:10773]	9.436	23.646	-1.31953	0.0018315	0.0372831
ENSG00000126353	CCR7	C-C motif chemokine receptor 7 [Source:HGNC Symbol;Acc:HGNC:1608]	0.748	1.99	-1.38324	0.00182682	0.0372831
ENSG00000256969	AC007207.2		1.136	4.472	-2.01927	0.00183348	0.0372831
ENSG00000158578	ALAS2	5'-aminolevulinate synthase 2 [Source:HGNC Symbol;Acc:HGNC:397]	0.912	3.912	-2.29538	0.00181837	0.0372831
ENSG00000109065	NAT9	N-acetyltransferase 9 (putative) [Source:HGNC Symbol;Acc:HGNC:23133]	18.14	22.126	-0.475415	0.0018672	0.0372849
ENSG00000242485	MRPL20	mitochondrial ribosomal protein L20 [Source:HGNC Symbol;Acc:HGNC:14478]	87.268	117.698	-0.586852	0.00187642	0.0372873
ENSG00000184347	SLIT3	slit guidance ligand 3 [Source:HGNC Symbol;Acc:HGNC:11087]	0.222	0.42	-1.1302	0.00187647	0.0372873
ENSG00000084092	NOA1	nitric oxide associated 1 [Source:HGNC Symbol;Acc:HGNC:28473]	11.07	13.98	-0.50563	0.00189518	0.0374994
ENSG00000183696	UPP1	uridine phosphorylase 1 [Source:HGNC Symbol;Acc:HGNC:12576]	13.744	20.088	-0.751094	0.00189726	0.0374994
ENSG00000092445	TYRO3	TYRO3 protein tyrosine kinase [Source:HGNC Symbol;Acc:HGNC:12446]	3.034	4.968	-0.825666	0.00189395	0.0374994
ENSG00000136518	ACTL6A	actin like 6A [Source:HGNC Symbol;Acc:HGNC:24124]	35.688	42.008	-0.43132	0.00190991	0.0375791
ENSG00000156110	ADK	adenosine kinase [Source:HGNC Symbol;Acc:HGNC:257]	27.028	40.694	-0.731698	0.0019094	0.0375791
ENSG00000198721	ECI2	enoyl-CoA delta isomerase 2 [Source:HGNC Symbol;Acc:HGNC:14601]	41.358	52.448	-0.484778	0.00192576	0.0377487
ENSG00000069122	ADGRF5	adhesion G protein-coupled receptor F5 [Source:HGNC Symbol;Acc:HGNC:19030]	1.016	3.11	-1.86433	0.00192488	0.0377487
ENSG00000167601	AXL	AXL receptor tyrosine kinase [Source:HGNC Symbol;Acc:HGNC:905]	2.062	2.844	-0.660881	0.00193663	0.0378198
ENSG00000128626	MRPS12	mitochondrial ribosomal protein S12 [Source:HGNC Symbol;Acc:HGNC:10380]	15.722	20.36	-0.551099	0.00194971	0.0380278
ENSG00000184232	OAF	out at first homolog [Source:HGNC Symbol;Acc:HGNC:28752]	18.028	24.372	-0.550554	0.00196471	0.0382099
ENSG00000144034	TPRKB	TP53RK binding protein [Source:HGNC Symbol;Acc:HGNC:24259]	35.938	50.746	-0.609888	0.0019745	0.038226
ENSG00000188229	TUBB4B	tubulin beta 4B class IVb [Source:HGNC Symbol;Acc:HGNC:20771]	102.486	173.112	-0.857068	0.00197451	0.038226
ENSG00000214389	RPS3AP26	ribosomal protein S3a pseudogene 26 [Source:HGNC Symbol;Acc:HGNC:36513]	4.426	5.924	-0.720292	0.00198029	0.0382904
ENSG00000066117	SMARCD1	SWI/SNF related, matrix associated, actin dependent regulator of chromatin, subfamily d, member 1 [Source:HGNC Symbol;Acc:HGNC:11106]	22.788	27.342	-0.437874	0.00200784	0.0385238
ENSG00000100462	PRMT5	protein arginine methyltransferase 5 [Source:HGNC Symbol;Acc:HGNC:10894]	28.146	34.888	-0.515758	0.00201372	0.0385238
ENSG00000141522	ARHGDIA	Rho GDP dissociation inhibitor alpha [Source:HGNC Symbol;Acc:HGNC:678]	203.224	263.456	-0.673949	0.00200912	0.0385238
ENSG00000052802	MSMO1	methylsterol monooxygenase 1 [Source:HGNC Symbol;Acc:HGNC:10545]	41.596	74.118	-0.944387	0.00201372	0.0385238
ENSG00000136158	SPRY2	sprouty RTK signaling antagonist 2 [Source:HGNC Symbol;Acc:HGNC:11270]	9.918	18.568	-0.9916	0.00200428	0.0385238
ENSG00000001497	LAS1L	LAS1 like, ribosome biogenesis factor [Source:HGNC Symbol;Acc:HGNC:25726]	13.558	17.506	-0.525891	0.00202577	0.0386216
ENSG00000176619	LMNB2	lamin B2 [Source:HGNC Symbol;Acc:HGNC:6638]	10.366	13.21	-0.667387	0.002027	0.0386216
ENSG00000071994	PDCD2	programmed cell death 2 [Source:HGNC Symbol;Acc:HGNC:8762]	38.416	47.41	-0.405773	0.0020607	0.0386301
ENSG00000108592	FTSJ3	FtsJ RNA methyltransferase homolog 3 [Source:HGNC Symbol;Acc:HGNC:17136]	19.848	23.37	-0.412167	0.00203664	0.0386301
ENSG00000168894	RNF181	ring finger protein 181 [Source:HGNC Symbol;Acc:HGNC:28037]	79.976	104.834	-0.526742	0.00205998	0.0386301
ENSG00000119285	HEATR1	HEAT repeat containing 1 [Source:HGNC Symbol;Acc:HGNC:25517]	6.762	8.852	-0.540586	0.00207763	0.0386301
ENSG00000198736	MSRB1	methionine sulfoxide reductase B1 [Source:HGNC Symbol;Acc:HGNC:14133]	26.514	33.432	-0.556872	0.00206227	0.0386301
ENSG00000018408	WWTR1	WW domain containing transcription regulator 1 [Source:HGNC Symbol;Acc:HGNC:24042]	25.006	37.742	-0.580435	0.00208363	0.0386301
ENSG00000118263	KLF7	Kruppel like factor 7 [Source:HGNC Symbol;Acc:HGNC:6350]	10.688	17.82	-0.731253	0.00204895	0.0386301
ENSG00000204228	HSD17B8	hydroxysteroid 17-beta dehydrogenase 8 [Source:HGNC Symbol;Acc:HGNC:3554]	8.998	13.502	-0.750273	0.0020579	0.0386301
ENSG00000021355	SERPINB1	serpin family B member 1 [Source:HGNC Symbol;Acc:HGNC:3311]	119.968	195.246	-0.790491	0.00207692	0.0386301
ENSG00000170545	SMAGP	small cell adhesion glycoprotein [Source:HGNC Symbol;Acc:HGNC:26918]	12.256	20.12	-0.843908	0.00203353	0.0386301
ENSG00000113161	HMGCR	3-hydroxy-3-methylglutaryl-CoA reductase [Source:HGNC Symbol;Acc:HGNC:5006]	28.046	44.948	-0.881662	0.00204989	0.0386301
ENSG00000197157	SND1	staphylococcal nuclease and tudor domain containing 1 [Source:HGNC Symbol;Acc:HGNC:30646]	80.052	96.296	-0.433572	0.00209478	0.0386437
ENSG00000236333	TRHDE-AS1	TRHDE antisense RNA 1 [Source:HGNC Symbol;Acc:HGNC:27471]	0.296	0.612	-1.18559	0.00209947	0.0386845
ENSG00000106355	LSM5	LSM5 homolog, U6 small nuclear RNA and mRNA degradation associated [Source:HGNC Symbol;Acc:HGNC:17162]	35.776	47.37	-0.526879	0.00210687	0.0386926
ENSG00000179348	GATA2	GATA binding protein 2 [Source:HGNC Symbol;Acc:HGNC:4171]	1.474	2.116	-0.705586	0.00212594	0.0388523
ENSG00000136160	EDNRB	endothelin receptor type B [Source:HGNC Symbol;Acc:HGNC:3180]	1.366	5.628	-2.03768	0.00212355	0.0388523
ENSG00000213626	LBH	limb bud and heart development [Source:HGNC Symbol;Acc:HGNC:29532]	27.76	41.548	-0.679139	0.00214092	0.039035
ENSG00000276043	UHRF1	ubiquitin like with PHD and ring finger domains 1 [Source:HGNC Symbol;Acc:HGNC:12556]	0.338	0.828	-1.40849	0.00214083	0.039035
ENSG00000242173	ARHGDIG	Rho GDP dissociation inhibitor gamma [Source:HGNC Symbol;Acc:HGNC:680]	1.724	4.556	-1.54148	0.00214624	0.0390411
ENSG00000077782	FGFR1	fibroblast growth factor receptor 1 [Source:HGNC Symbol;Acc:HGNC:3688]	50.086	68.024	-0.655476	0.00215812	0.0392117
ENSG00000181924	COA4	cytochrome c oxidase assembly factor 4 homolog [Source:HGNC Symbol;Acc:HGNC:24604]	50.522	61.154	-0.432203	0.00217791	0.0392264
ENSG00000176731	C8orf59	chromosome 8 open reading frame 59 [Source:HGNC Symbol;Acc:HGNC:32235]	54.36	73.724	-0.535666	0.00219397	0.0392264
ENSG00000198947	DMD	dystrophin [Source:HGNC Symbol;Acc:HGNC:2928]	4.338	6.592	-0.637765	0.00216504	0.0392264
ENSG00000106003	LFNG	LFNG O-fucosylpeptide 3-beta-N-acetylglucosaminyltransferase [Source:HGNC Symbol;Acc:HGNC:6560]	3.228	4.79	-0.725068	0.00220299	0.0392264
ENSG00000089159	PXN	paxillin [Source:HGNC Symbol;Acc:HGNC:9718]	45.908	71.39	-0.767572	0.00218006	0.0392264
ENSG00000128567	PODXL	podocalyxin like [Source:HGNC Symbol;Acc:HGNC:9171]	9.452	17.836	-1.05508	0.00220501	0.0392264
ENSG00000287725			0.608	1.172	-1.21713	0.00220281	0.0392264
ENSG00000101938	CHRDL1	chordin like 1 [Source:HGNC Symbol;Acc:HGNC:29861]	0.182	0.596	-1.76356	0.00217922	0.0392264
ENSG00000095752	IL11	interleukin 11 [Source:HGNC Symbol;Acc:HGNC:5966]	46.35	99.77	-1.78585	0.0021926	0.0392264
ENSG00000240602	AADACP1	arylacetamide deacetylase pseudogene 1 [Source:HGNC Symbol;Acc:HGNC:50305]	0.226	2.262	-3.51038	0.00219769	0.0392264
ENSG00000101361	NOP56	NOP56 ribonucleoprotein [Source:HGNC Symbol;Acc:HGNC:15911]	44.602	78.196	-0.859661	0.00221574	0.0393433
ENSG00000052795	FNIP2	folliculin interacting protein 2 [Source:HGNC Symbol;Acc:HGNC:29280]	37.02	54.53	-0.790081	0.00222282	0.0393821
ENSG00000175727	MLXIP	MLX interacting protein [Source:HGNC Symbol;Acc:HGNC:17055]	24.256	36.236	-0.751379	0.00222898	0.0394466
ENSG00000161526	SAP30BP	SAP30 binding protein [Source:HGNC Symbol;Acc:HGNC:30785]	42.246	58.402	-0.496304	0.00223561	0.0394747
ENSG00000103018	CYB5B	cytochrome b5 type B [Source:HGNC Symbol;Acc:HGNC:24374]	44.256	51.65	-0.39957	0.00224369	0.0395729
ENSG00000134107	BHLHE40	basic helix-loop-helix family member e40 [Source:HGNC Symbol;Acc:HGNC:1046]	71.216	95.53	-0.593549	0.00226067	0.0396011
ENSG00000135723	FHOD1	formin homology 2 domain containing 1 [Source:HGNC Symbol;Acc:HGNC:17905]	4.404	6.44	-0.690832	0.00225107	0.0396011
ENSG00000126756	UXT	ubiquitously expressed prefoldin like chaperone [Source:HGNC Symbol;Acc:HGNC:12641]	82.32	96.488	-0.368957	0.00228682	0.0398844
ENSG00000154016	GRAP	GRB2-related adaptor protein [Source:HGNC Symbol;Acc:HGNC:4562]	0.604	1.842	-1.7447	0.00229001	0.0398956
ENSG00000105447	GRWD1	glutamate rich WD repeat containing 1 [Source:HGNC Symbol;Acc:HGNC:21270]	11.736	15.504	-0.5633	0.0023017	0.0399415
ENSG00000236552	RPL13AP5	ribosomal protein L13a pseudogene 5 [Source:HGNC Symbol;Acc:HGNC:23736]	14.406	23.034	-0.823831	0.00230154	0.0399415
ENSG00000182580	EPHB3	EPH receptor B3 [Source:HGNC Symbol;Acc:HGNC:3394]	0.56	0.802	-1.02676	0.0023054	0.0399415
ENSG00000187955	COL14A1	collagen type XIV alpha 1 chain [Source:HGNC Symbol;Acc:HGNC:2191]	0.392	1.106	-1.69663	0.00230514	0.0399415
ENSG00000143549	TPM3	tropomyosin 3 [Source:HGNC Symbol;Acc:HGNC:12012]	196.922	236.912	-0.420128	0.00233847	0.0400155
ENSG00000134324	LPIN1	lipin 1 [Source:HGNC Symbol;Acc:HGNC:13345]	15.682	20.102	-0.443019	0.00233623	0.0400155
ENSG00000106305	AIMP2	aminoacyl tRNA synthetase complex interacting multifunctional protein 2 [Source:HGNC Symbol;Acc:HGNC:20609]	19.328	23.966	-0.469681	0.00234544	0.0400155
ENSG00000189046	ALKBH2	alkB homolog 2, alpha-ketoglutarate dependent dioxygenase [Source:HGNC Symbol;Acc:HGNC:32487]	8.34	13.176	-0.746856	0.00233566	0.0400155
ENSG00000138685	FGF2	fibroblast growth factor 2 [Source:HGNC Symbol;Acc:HGNC:3676]	7.758	20.61	-1.36202	0.0023394	0.0400155
ENSG00000142677	IL22RA1	interleukin 22 receptor subunit alpha 1 [Source:HGNC Symbol;Acc:HGNC:13700]	2.952	10.092	-1.68517	0.00233016	0.0400155
ENSG00000118004	COLEC11	collectin subfamily member 11 [Source:HGNC Symbol;Acc:HGNC:17213]	0.32	1.062	-1.93267	0.00232279	0.0400155
ENSG00000066056	TIE1	tyrosine kinase with immunoglobulin like and EGF like domains 1 [Source:HGNC Symbol;Acc:HGNC:11809]	0.574	1.696	-2.00263	0.0023421	0.0400155
ENSG00000278709	NKILA	NF-kappaB interacting lncRNA [Source:HGNC Symbol;Acc:HGNC:51599]	2.304	4.39	-1.02208	0.00235836	0.0401921
ENSG00000152104	PTPN14	protein tyrosine phosphatase, non-receptor type 14 [Source:HGNC Symbol;Acc:HGNC:9647]	2.604	2.952	-0.464985	0.00237871	0.0403633
ENSG00000123144	TRIR	telomerase RNA component interacting RNase [Source:HGNC Symbol;Acc:HGNC:28424]	67.92	82.798	-0.431901	0.00238962	0.0404259
ENSG00000108344	PSMD3	proteasome 26S subunit, non-ATPase 3 [Source:HGNC Symbol;Acc:HGNC:9560]	46.878	58.188	-0.463578	0.00239014	0.0404259
ENSG00000135624	CCT7	chaperonin containing TCP1 subunit 7 [Source:HGNC Symbol;Acc:HGNC:1622]	143.22	167.166	-0.418697	0.00240374	0.0404986
ENSG00000105171	POP4	POP4 homolog, ribonuclease P/MRP subunit [Source:HGNC Symbol;Acc:HGNC:30081]	44.854	57.56	-0.434317	0.00241254	0.0404986
ENSG00000124120	TTPAL	alpha tocopherol transfer protein like [Source:HGNC Symbol;Acc:HGNC:16114]	5.924	8.286	-0.617867	0.00239876	0.0404986
ENSG00000161249	DMKN	dermokine [Source:HGNC Symbol;Acc:HGNC:25063]	55.944	80.876	-0.632935	0.00240995	0.0404986
ENSG00000063601	MTMR1	myotubularin related protein 1 [Source:HGNC Symbol;Acc:HGNC:7449]	12.336	14.258	-0.390688	0.00249228	0.0405244
ENSG00000175416	CLTB	clathrin light chain B [Source:HGNC Symbol;Acc:HGNC:2091]	59.834	73.29	-0.477647	0.00247075	0.0405244
ENSG00000125450	NUP85	nucleoporin 85 [Source:HGNC Symbol;Acc:HGNC:8734]	16.222	19.578	-0.489557	0.0024717	0.0405244
ENSG00000146731	CCT6A	chaperonin containing TCP1 subunit 6A [Source:HGNC Symbol;Acc:HGNC:1620]	98.4	126.194	-0.528795	0.00244597	0.0405244
ENSG00000115233	PSMD14	proteasome 26S subunit, non-ATPase 14 [Source:HGNC Symbol;Acc:HGNC:16889]	62.28	81.722	-0.546217	0.00247456	0.0405244
ENSG00000135899	SP110	SP110 nuclear body protein [Source:HGNC Symbol;Acc:HGNC:5401]	8.332	11.052	-0.581913	0.00242215	0.0405244
ENSG00000168209	DDIT4	DNA damage inducible transcript 4 [Source:HGNC Symbol;Acc:HGNC:24944]	100.966	126.588	-0.649391	0.00249688	0.0405244
ENSG00000080608	PUM3	pumilio RNA binding family member 3 [Source:HGNC Symbol;Acc:HGNC:29676]	15.812	22.68	-0.649586	0.00244649	0.0405244
ENSG00000147687	TATDN1	TatD DNase domain containing 1 [Source:HGNC Symbol;Acc:HGNC:24220]	27.67	39.938	-0.683157	0.00247548	0.0405244
ENSG00000232573	RPL3P4	ribosomal protein L3 pseudogene 4 [Source:HGNC Symbol;Acc:HGNC:19805]	13.762	18.272	-0.68641	0.00247779	0.0405244
ENSG00000160256	FAM207A	family with sequence similarity 207 member A [Source:HGNC Symbol;Acc:HGNC:15811]	6.922	9.788	-0.689659	0.00244711	0.0405244
ENSG00000163597	SNHG16	small nucleolar RNA host gene 16 [Source:HGNC Symbol;Acc:HGNC:44352]	26.062	38.76	-0.721751	0.00247484	0.0405244
ENSG00000153391	INO80C	INO80 complex subunit C [Source:HGNC Symbol;Acc:HGNC:26994]	10.026	13.832	-0.739659	0.00242318	0.0405244
ENSG00000171490	RSL1D1	ribosomal L1 domain containing 1 [Source:HGNC Symbol;Acc:HGNC:24534]	62.33	98.298	-0.750086	0.00246757	0.0405244
ENSG00000065150	IPO5	importin 5 [Source:HGNC Symbol;Acc:HGNC:6402]	41.198	68.45	-0.871769	0.00244273	0.0405244
ENSG00000146677	AC004453.1		4.394	7.392	-0.875192	0.00246677	0.0405244
ENSG00000230202	AL450405.1		15.886	30.298	-0.957559	0.00244939	0.0405244
ENSG00000215492	HNRNPA1P7	heterogeneous nuclear ribonucleoprotein A1 pseudogene 7 [Source:HGNC Symbol;Acc:HGNC:31015]	2.44	5.184	-1.04405	0.00249588	0.0405244
ENSG00000188856	RPSAP47	ribosomal protein SA pseudogene 47 [Source:HGNC Symbol;Acc:HGNC:36162]	0.008	0.026	-1.07714	0.00241818	0.0405244
ENSG00000113083	LOX	lysyl oxidase [Source:HGNC Symbol;Acc:HGNC:6664]	2.52	5.434	-1.07806	0.00249288	0.0405244
ENSG00000162676	GFI1	growth factor independent 1 transcriptional repressor [Source:HGNC Symbol;Acc:HGNC:4237]	0.492	1.086	-1.07934	0.00247575	0.0405244
ENSG00000169908	TM4SF1	transmembrane 4 L six family member 1 [Source:HGNC Symbol;Acc:HGNC:11853]	314.924	676.594	-1.1123	0.00245687	0.0405244
ENSG00000110436	SLC1A2	solute carrier family 1 member 2 [Source:HGNC Symbol;Acc:HGNC:10940]	0.61	1.716	-1.47575	0.00246328	0.0405244
ENSG00000204539	CDSN	corneodesmosin [Source:HGNC Symbol;Acc:HGNC:1802]	0.38	1.872	-1.82633	0.00250956	0.0406041
ENSG00000173465	SSSCA1	Sjogren syndrome/scleroderma autoantigen 1 [Source:HGNC Symbol;Acc:HGNC:11328]	21.564	31.262	-0.775215	0.00251528	0.0406546
ENSG00000099341	PSMD8	proteasome 26S subunit, non-ATPase 8 [Source:HGNC Symbol;Acc:HGNC:9566]	114.826	138.448	-0.435689	0.00253786	0.0407254
ENSG00000103335	PIEZO1	piezo type mechanosensitive ion channel component 1 [Source:HGNC Symbol;Acc:HGNC:28993]	25.784	30.872	-0.370381	0.0026213	0.040971
ENSG00000099804	CDC34	cell division cycle 34 [Source:HGNC Symbol;Acc:HGNC:1734]	26.244	30.152	-0.422585	0.00258736	0.040971
ENSG00000140564	FURIN	furin, paired basic amino acid cleaving enzyme [Source:HGNC Symbol;Acc:HGNC:8568]	76.678	90.832	-0.426122	0.0026261	0.040971
ENSG00000141985	SH3GL1	SH3 domain containing GRB2 like 1, endophilin A2 [Source:HGNC Symbol;Acc:HGNC:10830]	20.268	24.712	-0.455499	0.00257672	0.040971
ENSG00000125733	TRIP10	thyroid hormone receptor interactor 10 [Source:HGNC Symbol;Acc:HGNC:12304]	21.916	27.718	-0.475915	0.00259292	0.040971
ENSG00000071054	MAP4K4	mitogen-activated protein kinase kinase kinase kinase 4 [Source:HGNC Symbol;Acc:HGNC:6866]	61.304	80.626	-0.484822	0.00256624	0.040971
ENSG00000175756	AURKAIP1	aurora kinase A interacting protein 1 [Source:HGNC Symbol;Acc:HGNC:24114]	38.446	48.934	-0.550511	0.00262166	0.040971
ENSG00000198911	SREBF2	sterol regulatory element binding transcription factor 2 [Source:HGNC Symbol;Acc:HGNC:11290]	39.468	52.592	-0.615031	0.00264211	0.040971
ENSG00000129465	RIPK3	receptor interacting serine/threonine kinase 3 [Source:HGNC Symbol;Acc:HGNC:10021]	11.912	15.74	-0.621377	0.00260279	0.040971
ENSG00000118894	EEF2KMT	eukaryotic elongation factor 2 lysine methyltransferase [Source:HGNC Symbol;Acc:HGNC:32221]	5.332	7.204	-0.645623	0.00256209	0.040971
ENSG00000156384	SFR1	SWI5 dependent homologous recombination repair protein 1 [Source:HGNC Symbol;Acc:HGNC:29574]	4.538	6.494	-0.694042	0.00263302	0.040971
ENSG00000120254	MTHFD1L	methylenetetrahydrofolate dehydrogenase (NADP+ dependent) 1 like [Source:HGNC Symbol;Acc:HGNC:21055]	12.406	18.794	-0.764998	0.00261743	0.040971
ENSG00000186615	KTN1-AS1	KTN1 antisense RNA 1 [Source:HGNC Symbol;Acc:HGNC:19842]	1.144	1.928	-0.787912	0.00263514	0.040971
ENSG00000121068	TBX2	T-box 2 [Source:HGNC Symbol;Acc:HGNC:11597]	1.152	1.954	-0.937632	0.00259301	0.040971
ENSG00000250899	AC125807.2		1.61	3.468	-1.32036	0.00257967	0.040971
ENSG00000185615	PDIA2	protein disulfide isomerase family A member 2 [Source:HGNC Symbol;Acc:HGNC:14180]	25.098	57.288	-1.4557	0.00261555	0.040971
ENSG00000285933			3.33	9.136	-1.47802	0.00259253	0.040971
ENSG00000102178	UBL4A	ubiquitin like 4A [Source:HGNC Symbol;Acc:HGNC:12505]	14.624	17.558	-0.410035	0.00264608	0.040992
ENSG00000100034	PPM1F	protein phosphatase, Mg2+/Mn2+ dependent 1F [Source:HGNC Symbol;Acc:HGNC:19388]	3.682	4.702	-0.469693	0.002654	0.041074
ENSG00000136045	PWP1	PWP1 homolog, endonuclein [Source:HGNC Symbol;Acc:HGNC:17015]	28.04	36.032	-0.445568	0.00265832	0.0411003
ENSG00000183684	ALYREF	Aly/REF export factor [Source:HGNC Symbol;Acc:HGNC:19071]	16.234	24.106	-0.744318	0.00266718	0.0411966
ENSG00000111481	COPZ1	coatomer protein complex subunit zeta 1 [Source:HGNC Symbol;Acc:HGNC:2243]	158.05	181.772	-0.391473	0.00268611	0.0413139
ENSG00000159111	MRPL10	mitochondrial ribosomal protein L10 [Source:HGNC Symbol;Acc:HGNC:14055]	19.608	22.378	-0.398873	0.00268849	0.0413139
ENSG00000174744	BRMS1	breast cancer metastasis suppressor 1 [Source:HGNC Symbol;Acc:HGNC:17262]	35.76	44.218	-0.502195	0.00269997	0.0413139
ENSG00000164035	EMCN	endomucin [Source:HGNC Symbol;Acc:HGNC:16041]	0.248	0.69	-1.76856	0.00270107	0.0413139
ENSG00000130164	LDLR	low density lipoprotein receptor [Source:HGNC Symbol;Acc:HGNC:6547]	33.792	57.394	-0.890723	0.00272666	0.0415417
ENSG00000196419	XRCC6	X-ray repair cross complementing 6 [Source:HGNC Symbol;Acc:HGNC:4055]	163.392	187.792	-0.401236	0.00273804	0.0416342
ENSG00000038382	TRIO	trio Rho guanine nucleotide exchange factor [Source:HGNC Symbol;Acc:HGNC:12303]	31.338	35.844	-0.411274	0.0027369	0.0416342
ENSG00000276023	DUSP14	dual specificity phosphatase 14 [Source:HGNC Symbol;Acc:HGNC:17007]	7.656	9.414	-0.469943	0.00274644	0.0416905
ENSG00000160145	KALRN	kalirin RhoGEF kinase [Source:HGNC Symbol;Acc:HGNC:4814]	5.658	7.832	-0.62581	0.00276038	0.0416905
ENSG00000116661	FBXO2	F-box protein 2 [Source:HGNC Symbol;Acc:HGNC:13581]	25.854	56.284	-1.22873	0.00275642	0.0416905
ENSG00000134817	APLNR	apelin receptor [Source:HGNC Symbol;Acc:HGNC:339]	0.156	0.754	-3.04532	0.0027589	0.0416905
ENSG00000176915	ANKLE2	ankyrin repeat and LEM domain containing 2 [Source:HGNC Symbol;Acc:HGNC:29101]	30.518	40.424	-0.577268	0.00278553	0.0418667
ENSG00000257337	AC068888.1		6.528	9.308	-0.637814	0.00279179	0.0418667
ENSG00000102317	RBM3	RNA binding motif protein 3 [Source:HGNC Symbol;Acc:HGNC:9900]	259.452	536.566	-1.38778	0.00277927	0.0418667
ENSG00000154133	ROBO4	roundabout guidance receptor 4 [Source:HGNC Symbol;Acc:HGNC:17985]	0.708	2.128	-1.75986	0.00279009	0.0418667
ENSG00000171067	C11orf24	chromosome 11 open reading frame 24 [Source:HGNC Symbol;Acc:HGNC:1174]	14.462	17.28	-0.380455	0.00280707	0.0418793
ENSG00000076928	ARHGEF1	Rho guanine nucleotide exchange factor 1 [Source:HGNC Symbol;Acc:HGNC:681]	17.782	21.544	-0.495076	0.002809	0.0418793
ENSG00000106803	SEC61B	Sec61 translocon beta subunit [Source:HGNC Symbol;Acc:HGNC:16993]	205.228	272.69	-0.54729	0.00280041	0.0418793
ENSG00000173545	ZNF622	zinc finger protein 622 [Source:HGNC Symbol;Acc:HGNC:30958]	21.06	24.87	-0.408584	0.0028348	0.0421239
ENSG00000105700	KXD1	KxDL motif containing 1 [Source:HGNC Symbol;Acc:HGNC:28420]	43.444	49.44	-0.360874	0.00285286	0.042312
ENSG00000186575	NF2	neurofibromin 2 [Source:HGNC Symbol;Acc:HGNC:7773]	9.968	13.828	-0.569848	0.00286653	0.0423661
ENSG00000185507	IRF7	interferon regulatory factor 7 [Source:HGNC Symbol;Acc:HGNC:6122]	5.966	9.548	-0.914135	0.00286732	0.0423661
ENSG00000141499	WRAP53	WD repeat containing antisense to TP53 [Source:HGNC Symbol;Acc:HGNC:25522]	4.186	5.408	-0.580346	0.00288135	0.0424645
ENSG00000177192	PUS1	pseudouridylate synthase 1 [Source:HGNC Symbol;Acc:HGNC:15508]	5.598	9.164	-0.824985	0.00288188	0.0424645
ENSG00000227057	WDR46	WD repeat domain 46 [Source:HGNC Symbol;Acc:HGNC:13923]	21.46	28.048	-0.570415	0.00288527	0.042471
ENSG00000161547	SRSF2	serine and arginine rich splicing factor 2 [Source:HGNC Symbol;Acc:HGNC:10783]	70.618	93.02	-0.540773	0.00289648	0.0424773
ENSG00000125652	ALKBH7	alkB homolog 7 [Source:HGNC Symbol;Acc:HGNC:21306]	18.304	24.294	-0.609057	0.00289926	0.0424773
ENSG00000106244	PDAP1	PDGFA associated protein 1 [Source:HGNC Symbol;Acc:HGNC:14634]	98.334	122.954	-0.434459	0.00291524	0.0426316
ENSG00000114529	C3orf52	chromosome 3 open reading frame 52 [Source:HGNC Symbol;Acc:HGNC:26255]	13.412	24.61	-0.906597	0.00292715	0.0427299
ENSG00000136859	ANGPTL2	angiopoietin like 2 [Source:HGNC Symbol;Acc:HGNC:490]	5.466	9.662	-0.968392	0.00293014	0.0427299
ENSG00000156928	MALSU1	mitochondrial assembly of ribosomal large subunit 1 [Source:HGNC Symbol;Acc:HGNC:21721]	24.5	30.256	-0.435096	0.00294634	0.0429261
ENSG00000125753	VASP	vasodilator stimulated phosphoprotein [Source:HGNC Symbol;Acc:HGNC:12652]	45.718	54.53	-0.409909	0.00297429	0.0430387
ENSG00000150753	CCT5	chaperonin containing TCP1 subunit 5 [Source:HGNC Symbol;Acc:HGNC:1618]	155.764	205.46	-0.495069	0.00299917	0.0430387
ENSG00000159199	ATP5MC1	ATP synthase membrane subunit c locus 1 [Source:HGNC Symbol;Acc:HGNC:841]	137.23	183.474	-0.586812	0.00299961	0.0430387
ENSG00000183010	PYCR1	pyrroline-5-carboxylate reductase 1 [Source:HGNC Symbol;Acc:HGNC:9721]	19.96	24.838	-0.586975	0.00299309	0.0430387
ENSG00000260708	AL118516.1		3.578	5.45	-0.747152	0.0029955	0.0430387
ENSG00000198417	MT1F	metallothionein 1F [Source:HGNC Symbol;Acc:HGNC:7398]	65.622	109.906	-0.812822	0.00300062	0.0430387
ENSG00000117877	CD3EAP	CD3e molecule associated protein [Source:HGNC Symbol;Acc:HGNC:24219]	2.818	5.418	-0.963957	0.0029653	0.0430387
ENSG00000135547	HEY2	hes related family bHLH transcription factor with YRPW motif 2 [Source:HGNC Symbol;Acc:HGNC:4881]	0.332	0.634	-1.18382	0.00299573	0.0430387
ENSG00000064989	CALCRL	calcitonin receptor like receptor [Source:HGNC Symbol;Acc:HGNC:16709]	1.36	2.914	-1.38553	0.00298707	0.0430387
ENSG00000115091	ACTR3	ARP3 actin related protein 3 homolog [Source:HGNC Symbol;Acc:HGNC:170]	154.294	193.86	-0.415174	0.00300406	0.0430463
ENSG00000108883	EFTUD2	elongation factor Tu GTP binding domain containing 2 [Source:HGNC Symbol;Acc:HGNC:30858]	56.19	61.426	-0.362525	0.00301523	0.0430881
ENSG00000159131	GART	phosphoribosylglycinamide formyltransferase, phosphoribosylglycinamide synthetase, phosphoribosylaminoimidazole synthetase [Source:HGNC Symbol;Acc:HGNC:4163]	27.402	31.216	-0.377362	0.00302437	0.0431793
ENSG00000115241	PPM1G	protein phosphatase, Mg2+/Mn2+ dependent 1G [Source:HGNC Symbol;Acc:HGNC:9278]	50.95	61.336	-0.430725	0.00302715	0.0431796
ENSG00000183963	SMTN	smoothelin [Source:HGNC Symbol;Acc:HGNC:11126]	10.722	21.58	-1.13206	0.00303667	0.0432518
ENSG00000142684	ZNF593	zinc finger protein 593 [Source:HGNC Symbol;Acc:HGNC:30943]	20.502	28.148	-0.611704	0.00304265	0.0432758
ENSG00000145777	TSLP	thymic stromal lymphopoietin [Source:HGNC Symbol;Acc:HGNC:30743]	0.274	1.062	-2.12236	0.003051	0.0432834
ENSG00000142227	EMP3	epithelial membrane protein 3 [Source:HGNC Symbol;Acc:HGNC:3335]	31.034	47.406	-0.849447	0.0030587	0.0433532
ENSG00000141378	PTRH2	peptidyl-tRNA hydrolase 2 [Source:HGNC Symbol;Acc:HGNC:24265]	27.034	35.074	-0.510674	0.00307064	0.0434046
ENSG00000134363	FST	follistatin [Source:HGNC Symbol;Acc:HGNC:3971]	0.91	3.182	-1.80851	0.00308661	0.0435518
ENSG00000092330	TINF2	TERF1 interacting nuclear factor 2 [Source:HGNC Symbol;Acc:HGNC:11824]	29.572	33.402	-0.37089	0.00311493	0.0436421
ENSG00000123130	ACOT9	acyl-CoA thioesterase 9 [Source:HGNC Symbol;Acc:HGNC:17152]	25.64	30.904	-0.393683	0.00310176	0.0436421
ENSG00000124562	SNRPC	small nuclear ribonucleoprotein polypeptide C [Source:HGNC Symbol;Acc:HGNC:11157]	69.276	85.958	-0.454852	0.00312003	0.0436421
ENSG00000165775	FUNDC2	FUN14 domain containing 2 [Source:HGNC Symbol;Acc:HGNC:24925]	76.604	95.032	-0.485668	0.00312354	0.0436421
ENSG00000137962	ARHGAP29	Rho GTPase activating protein 29 [Source:HGNC Symbol;Acc:HGNC:30207]	8.012	10.468	-0.546721	0.00312015	0.0436421
ENSG00000167088	SNRPD1	small nuclear ribonucleoprotein D1 polypeptide [Source:HGNC Symbol;Acc:HGNC:11158]	55.866	76.238	-0.609766	0.00312366	0.0436421
ENSG00000125148	MT2A	metallothionein 2A [Source:HGNC Symbol;Acc:HGNC:7406]	367.352	841.154	-1.15792	0.00311686	0.0436421
ENSG00000283632	EXOC3L2	exocyst complex component 3 like 2 [Source:HGNC Symbol;Acc:HGNC:30162]	0.24	0.696	-2.08482	0.00311708	0.0436421
ENSG00000005884	ITGA3	integrin subunit alpha 3 [Source:HGNC Symbol;Acc:HGNC:6139]	72.938	89.632	-0.48013	0.00313151	0.0437127
ENSG00000161638	ITGA5	integrin subunit alpha 5 [Source:HGNC Symbol;Acc:HGNC:6141]	29.624	36.12	-0.56216	0.00313796	0.0437549
ENSG00000134815	DHX34	DExH-box helicase 34 [Source:HGNC Symbol;Acc:HGNC:16719]	3.7	4.782	-0.520061	0.00315876	0.0438543
ENSG00000160789	LMNA	lamin A/C [Source:HGNC Symbol;Acc:HGNC:6636]	81.392	109.386	-0.564126	0.00315133	0.0438543
ENSG00000165175	MID1IP1	MID1 interacting protein 1 [Source:HGNC Symbol;Acc:HGNC:20715]	16.708	22.29	-0.578916	0.00317341	0.0438543
ENSG00000070814	TCOF1	treacle ribosome biogenesis factor 1 [Source:HGNC Symbol;Acc:HGNC:11654]	7.5	9.932	-0.595569	0.00316199	0.0438543
ENSG00000260260	SNHG19	small nucleolar RNA host gene 19 [Source:HGNC Symbol;Acc:HGNC:49574]	41.392	76.438	-1.10101	0.00317089	0.0438543
ENSG00000130300	PLVAP	plasmalemma vesicle associated protein [Source:HGNC Symbol;Acc:HGNC:13635]	11.022	29.57	-1.91855	0.00316833	0.0438543
ENSG00000267107	PCAT19	prostate cancer associated transcript 19 (non-protein coding) [Source:HGNC Symbol;Acc:HGNC:49593]	0.814	2.286	-2.00491	0.00316249	0.0438543
ENSG00000147257	GPC3	glypican 3 [Source:HGNC Symbol;Acc:HGNC:4451]	0.468	1.546	-2.12369	0.00318365	0.0438543
ENSG00000132471	WBP2	WW domain binding protein 2 [Source:HGNC Symbol;Acc:HGNC:12738]	98.182	115.422	-0.396158	0.00318767	0.0438579
ENSG00000068438	FTSJ1	FtsJ RNA methyltransferase homolog 1 [Source:HGNC Symbol;Acc:HGNC:13254]	18.2	23.044	-0.556768	0.00318951	0.0438579
ENSG00000105364	MRPL4	mitochondrial ribosomal protein L4 [Source:HGNC Symbol;Acc:HGNC:14276]	15.054	19.842	-0.546519	0.00319785	0.043917
ENSG00000135678	CPM	carboxypeptidase M [Source:HGNC Symbol;Acc:HGNC:2311]	28.778	39.56	-0.653878	0.00321212	0.0439686
ENSG00000122863	CHST3	carbohydrate sulfotransferase 3 [Source:HGNC Symbol;Acc:HGNC:1971]	3.018	5.146	-0.904406	0.00321559	0.0439686
ENSG00000160691	SHC1	SHC adaptor protein 1 [Source:HGNC Symbol;Acc:HGNC:10840]	37.704	43.864	-0.387589	0.0032722	0.0440716
ENSG00000172663	TMEM134	transmembrane protein 134 [Source:HGNC Symbol;Acc:HGNC:26142]	21.736	28.702	-0.419096	0.00325452	0.0440716
ENSG00000100129	EIF3L	eukaryotic translation initiation factor 3 subunit L [Source:HGNC Symbol;Acc:HGNC:18138]	173.33	212.45	-0.43754	0.00324598	0.0440716
ENSG00000013275	PSMC4	proteasome 26S subunit, ATPase 4 [Source:HGNC Symbol;Acc:HGNC:9551]	51.512	65.67	-0.487353	0.00325442	0.0440716
ENSG00000110921	MVK	mevalonate kinase [Source:HGNC Symbol;Acc:HGNC:7530]	10.14	12.84	-0.568133	0.00324954	0.0440716
ENSG00000229132	EIF4A1P10	eukaryotic translation initiation factor 4A1 pseudogene 10 [Source:HGNC Symbol;Acc:HGNC:37930]	0.394	0.644	-0.915333	0.00327255	0.0440716
ENSG00000142789	CELA3A	chymotrypsin like elastase family member 3A [Source:HGNC Symbol;Acc:HGNC:15944]	664.124	4763.67	-2.82395	0.00325596	0.0440716
ENSG00000107554	DNMBP	dynamin binding protein [Source:HGNC Symbol;Acc:HGNC:30373]	8.336	9.314	-0.378617	0.00330411	0.0441358
ENSG00000103429	BFAR	bifunctional apoptosis regulator [Source:HGNC Symbol;Acc:HGNC:17613]	38.942	49.706	-0.490797	0.00329552	0.0441358
ENSG00000169991	IFFO2	intermediate filament family orphan 2 [Source:HGNC Symbol;Acc:HGNC:27006]	11.636	17.53	-0.694407	0.00330661	0.0441358
ENSG00000077044	DGKD	diacylglycerol kinase delta [Source:HGNC Symbol;Acc:HGNC:2851]	6.974	10.426	-0.826739	0.00330467	0.0441358
ENSG00000149564	ESAM	endothelial cell adhesion molecule [Source:HGNC Symbol;Acc:HGNC:17474]	2.484	5.992	-1.39013	0.00333534	0.0443448
ENSG00000066322	ELOVL1	ELOVL fatty acid elongase 1 [Source:HGNC Symbol;Acc:HGNC:14418]	79.784	89.7	-0.345061	0.00336627	0.0444585
ENSG00000133818	RRAS2	RAS related 2 [Source:HGNC Symbol;Acc:HGNC:17271]	32.514	41.25	-0.431415	0.00339728	0.0444585
ENSG00000184110	EIF3C	eukaryotic translation initiation factor 3 subunit C [Source:HGNC Symbol;Acc:HGNC:3279]	80.468	105.51	-0.536119	0.00337545	0.0444585
ENSG00000006007	GDE1	glycerophosphodiester phosphodiesterase 1 [Source:HGNC Symbol;Acc:HGNC:29644]	34.91	45.28	-0.552876	0.00335817	0.0444585
ENSG00000128283	CDC42EP1	CDC42 effector protein 1 [Source:HGNC Symbol;Acc:HGNC:17014]	55.596	71.486	-0.553166	0.00337097	0.0444585
ENSG00000114686	MRPL3	mitochondrial ribosomal protein L3 [Source:HGNC Symbol;Acc:HGNC:10379]	51.866	69.464	-0.574117	0.00338906	0.0444585
ENSG00000242071	RPL7AP6	ribosomal protein L7a pseudogene 6 [Source:HGNC Symbol;Acc:HGNC:19785]	3.516	5.574	-0.796689	0.0033735	0.0444585
ENSG00000067798	NAV3	neuron navigator 3 [Source:HGNC Symbol;Acc:HGNC:15998]	2.46	4.616	-0.894636	0.00337252	0.0444585
ENSG00000115758	ODC1	ornithine decarboxylase 1 [Source:HGNC Symbol;Acc:HGNC:8109]	47.818	82.998	-0.932191	0.00339783	0.0444585
ENSG00000166592	RRAD	RRAD, Ras related glycolysis inhibitor and calcium channel regulator [Source:HGNC Symbol;Acc:HGNC:10446]	2.96	6.382	-1.21492	0.00338794	0.0444585
ENSG00000158859	ADAMTS4	ADAM metallopeptidase with thrombospondin type 1 motif 4 [Source:HGNC Symbol;Acc:HGNC:220]	1.64	4.268	-1.41903	0.00336382	0.0444585
ENSG00000137672	TRPC6	transient receptor potential cation channel subfamily C member 6 [Source:HGNC Symbol;Acc:HGNC:12338]	0.24	0.646	-1.74074	0.00338195	0.0444585
ENSG00000142039	CCDC97	coiled-coil domain containing 97 [Source:HGNC Symbol;Acc:HGNC:28289]	11.052	12.666	-0.423255	0.00341024	0.0444899
ENSG00000109079	TNFAIP1	TNF alpha induced protein 1 [Source:HGNC Symbol;Acc:HGNC:11894]	30.512	37.87	-0.455022	0.00340838	0.0444899
ENSG00000228649	SNHG26	small nucleolar RNA host gene 26 [Source:HGNC Symbol;Acc:HGNC:53131]	0.706	2.26	-1.73894	0.00342104	0.04452
ENSG00000108039	XPNPEP1	X-prolyl aminopeptidase 1 [Source:HGNC Symbol;Acc:HGNC:12822]	45.542	52.868	-0.346138	0.00342905	0.0445321
ENSG00000112578	BYSL	bystin like [Source:HGNC Symbol;Acc:HGNC:1157]	9.142	12.522	-0.622925	0.00343693	0.0445486
ENSG00000189410	SH2D5	SH2 domain containing 5 [Source:HGNC Symbol;Acc:HGNC:28819]	0.632	2.992	-2.20408	0.00343885	0.0445486
ENSG00000068028	RASSF1	Ras association domain family member 1 [Source:HGNC Symbol;Acc:HGNC:9882]	10.27	14.716	-0.684467	0.00345281	0.0445753
ENSG00000167984	NLRC3	NLR family CARD domain containing 3 [Source:HGNC Symbol;Acc:HGNC:29889]	0.114	0.268	-1.36195	0.00344785	0.0445753
ENSG00000100296	THOC5	THO complex 5 [Source:HGNC Symbol;Acc:HGNC:19074]	9.496	11.71	-0.388139	0.00348785	0.0447911
ENSG00000118257	NRP2	neuropilin 2 [Source:HGNC Symbol;Acc:HGNC:8005]	5.748	10.548	-1.0898	0.00350517	0.0449615
ENSG00000268416	AC010329.1		0.322	0.522	-0.931702	0.00351268	0.0450209
ENSG00000125944	HNRNPR	heterogeneous nuclear ribonucleoprotein R [Source:HGNC Symbol;Acc:HGNC:5047]	74.674	99.484	-0.493518	0.00353805	0.045272
ENSG00000171135	JAGN1	jagunal homolog 1 [Source:HGNC Symbol;Acc:HGNC:26926]	22.068	25.532	-0.390226	0.0035769	0.0452834
ENSG00000134748	PRPF38A	pre-mRNA processing factor 38A [Source:HGNC Symbol;Acc:HGNC:25930]	12.676	16.026	-0.391008	0.00355991	0.0452834
ENSG00000143368	SF3B4	splicing factor 3b subunit 4 [Source:HGNC Symbol;Acc:HGNC:10771]	37.42	45.346	-0.434885	0.00356675	0.0452834
ENSG00000137522	RNF121	ring finger protein 121 [Source:HGNC Symbol;Acc:HGNC:21070]	17.472	22.492	-0.469427	0.00357956	0.0452834
ENSG00000173210	ABLIM3	actin binding LIM protein family member 3 [Source:HGNC Symbol;Acc:HGNC:29132]	7.608	9.696	-0.605592	0.00354491	0.0452834
ENSG00000134548	SPX	spexin hormone [Source:HGNC Symbol;Acc:HGNC:28139]	4.102	6.33	-0.801243	0.00356698	0.0452834
ENSG00000244313	AC024293.1		5.43	9.234	-0.810524	0.00355199	0.0452834
ENSG00000175602	CCDC85B	coiled-coil domain containing 85B [Source:HGNC Symbol;Acc:HGNC:24926]	3.104	6.168	-1.18041	0.00355725	0.0452834
ENSG00000175592	FOSL1	FOS like 1, AP-1 transcription factor subunit [Source:HGNC Symbol;Acc:HGNC:13718]	6.324	22.244	-1.7715	0.00355501	0.0452834
ENSG00000101182	PSMA7	proteasome subunit alpha 7 [Source:HGNC Symbol;Acc:HGNC:9536]	138.988	167.214	-0.418793	0.00360898	0.0454007
ENSG00000070423	RNF126	ring finger protein 126 [Source:HGNC Symbol;Acc:HGNC:21151]	11.554	15.014	-0.6121	0.0036063	0.0454007
ENSG00000111145	ELK3	ELK3, ETS transcription factor [Source:HGNC Symbol;Acc:HGNC:3325]	13.238	22.284	-0.932006	0.00359928	0.0454007
ENSG00000123689	G0S2	G0/G1 switch 2 [Source:HGNC Symbol;Acc:HGNC:30229]	16.024	37.876	-1.26872	0.0036045	0.0454007
ENSG00000172757	CFL1	cofilin 1 [Source:HGNC Symbol;Acc:HGNC:1874]	495.202	636.638	-0.490254	0.00363241	0.0455856
ENSG00000147677	EIF3H	eukaryotic translation initiation factor 3 subunit H [Source:HGNC Symbol;Acc:HGNC:3273]	200.802	232.654	-0.382743	0.00365394	0.0456364
ENSG00000148843	PDCD11	programmed cell death 11 [Source:HGNC Symbol;Acc:HGNC:13408]	8.746	11.486	-0.524135	0.00364814	0.0456364
ENSG00000105321	CCDC9	coiled-coil domain containing 9 [Source:HGNC Symbol;Acc:HGNC:24560]	11.268	13.806	-0.56076	0.00365223	0.0456364
ENSG00000118523	CTGF	connective tissue growth factor [Source:HGNC Symbol;Acc:HGNC:2500]	28.526	45.742	-0.923755	0.00364786	0.0456364
ENSG00000169217	CD2BP2	CD2 cytoplasmic tail binding protein 2 [Source:HGNC Symbol;Acc:HGNC:1656]	51.31	64.518	-0.350644	0.00366665	0.0457192
ENSG00000168259	DNAJC7	DnaJ heat shock protein family (Hsp40) member C7 [Source:HGNC Symbol;Acc:HGNC:12392]	53.31	61.556	-0.380968	0.00367809	0.0457192
ENSG00000143799	PARP1	poly(ADP-ribose) polymerase 1 [Source:HGNC Symbol;Acc:HGNC:270]	36.416	44.556	-0.46918	0.00367711	0.0457192
ENSG00000128050	PAICS	phosphoribosylaminoimidazole carboxylase and phosphoribosylaminoimidazolesuccinocarboxamide synthase [Source:HGNC Symbol;Acc:HGNC:8587]	31.3	48.284	-0.722452	0.00366895	0.0457192
ENSG00000196428	TSC22D2	TSC22 domain family member 2 [Source:HGNC Symbol;Acc:HGNC:29095]	8.516	10.882	-0.445297	0.00368805	0.0457337
ENSG00000141384	TAF4B	TATA-box binding protein associated factor 4b [Source:HGNC Symbol;Acc:HGNC:11538]	0.966	1.718	-0.923011	0.00368736	0.0457337
ENSG00000119630	PGF	placental growth factor [Source:HGNC Symbol;Acc:HGNC:8893]	1.616	4.25	-1.52171	0.00369385	0.0457337
ENSG00000148484	RSU1	Ras suppressor protein 1 [Source:HGNC Symbol;Acc:HGNC:10464]	38.356	49.18	-0.456414	0.00369893	0.0457604
ENSG00000111581	NUP107	nucleoporin 107 [Source:HGNC Symbol;Acc:HGNC:29914]	18.628	23.88	-0.510689	0.00370517	0.0458014
ENSG00000082153	BZW1	basic leucine zipper and W2 domains 1 [Source:HGNC Symbol;Acc:HGNC:18380]	164.988	218.616	-0.510522	0.00371305	0.0458148
ENSG00000254647	INS	insulin [Source:HGNC Symbol;Acc:HGNC:6081]	19894.2	28316.6	-0.834268	0.00371796	0.0458148
ENSG00000157601	MX1	MX dynamin like GTPase 1 [Source:HGNC Symbol;Acc:HGNC:7532]	25.608	56.298	-1.19417	0.00371474	0.0458148
ENSG00000184956	MUC6	mucin 6, oligomeric mucus/gel-forming [Source:HGNC Symbol;Acc:HGNC:7517]	2.272	4.602	-0.875535	0.00372977	0.0458521
ENSG00000105329	TGFB1	transforming growth factor beta 1 [Source:HGNC Symbol;Acc:HGNC:11766]	10.184	14.556	-0.60645	0.0037358	0.0458903
ENSG00000130713	EXOSC2	exosome component 2 [Source:HGNC Symbol;Acc:HGNC:17097]	10.486	13.868	-0.540636	0.00374104	0.0459034
ENSG00000117318	ID3	inhibitor of DNA binding 3, HLH protein [Source:HGNC Symbol;Acc:HGNC:5362]	45.348	65.328	-0.670223	0.00374588	0.0459061
ENSG00000240038	AMY2B	amylase, alpha 2B (pancreatic) [Source:HGNC Symbol;Acc:HGNC:478]	8.394	60.932	-2.61345	0.00375577	0.0459554
ENSG00000071539	TRIP13	thyroid hormone receptor interactor 13 [Source:HGNC Symbol;Acc:HGNC:12307]	0.872	1.718	-1.00725	0.00377569	0.0460551
ENSG00000187715	KBTBD12	kelch repeat and BTB domain containing 12 [Source:HGNC Symbol;Acc:HGNC:25731]	1.114	1.574	-0.683307	0.00378331	0.0461122
ENSG00000204209	DAXX	death domain associated protein [Source:HGNC Symbol;Acc:HGNC:2681]	29.778	32.652	-0.337057	0.00380267	0.0462044
ENSG00000110060	PUS3	pseudouridylate synthase 3 [Source:HGNC Symbol;Acc:HGNC:25461]	14	20.036	-0.715425	0.00380055	0.0462044
ENSG00000107949	BCCIP	BRCA2 and CDKN1A interacting protein [Source:HGNC Symbol;Acc:HGNC:978]	38.182	55.628	-0.66274	0.00381004	0.046235
ENSG00000135480	KRT7	keratin 7 [Source:HGNC Symbol;Acc:HGNC:6445]	511.808	883.42	-0.829311	0.00381109	0.046235
ENSG00000132792	CTNNBL1	catenin beta like 1 [Source:HGNC Symbol;Acc:HGNC:15879]	16.706	19.212	-0.364731	0.00382143	0.0462441
ENSG00000110218	PANX1	pannexin 1 [Source:HGNC Symbol;Acc:HGNC:8599]	14.152	16.696	-0.418035	0.00382093	0.0462441
ENSG00000187800	PEAR1	platelet endothelial aggregation receptor 1 [Source:HGNC Symbol;Acc:HGNC:33631]	0.494	0.744	-0.756623	0.00382661	0.0462441
ENSG00000160087	UBE2J2	ubiquitin conjugating enzyme E2 J2 [Source:HGNC Symbol;Acc:HGNC:19268]	20.054	23.89	-0.449851	0.00384774	0.0463187
ENSG00000142864	SERBP1	SERPINE1 mRNA binding protein 1 [Source:HGNC Symbol;Acc:HGNC:17860]	91.778	128.972	-0.571303	0.00384853	0.0463187
ENSG00000225131	PSME2P2	proteasome activator subunit 2 pseudogene 2 [Source:HGNC Symbol;Acc:HGNC:30160]	4.158	6.314	-0.775277	0.00384758	0.0463187
ENSG00000164086	DUSP7	dual specificity phosphatase 7 [Source:HGNC Symbol;Acc:HGNC:3073]	3.364	4.398	-0.553727	0.00385716	0.0463273
ENSG00000141905	NFIC	nuclear factor I C [Source:HGNC Symbol;Acc:HGNC:7786]	26.064	33.632	-0.418781	0.00386671	0.0463807
ENSG00000159479	MED8	mediator complex subunit 8 [Source:HGNC Symbol;Acc:HGNC:19971]	19.16	22.95	-0.417083	0.00388053	0.0464405
ENSG00000170638	TRABD	TraB domain containing [Source:HGNC Symbol;Acc:HGNC:28805]	10.01	12.666	-0.523677	0.00388627	0.0464632
ENSG00000163866	SMIM12	small integral membrane protein 12 [Source:HGNC Symbol;Acc:HGNC:25154]	26.422	30.58	-0.383149	0.00391637	0.0464683
ENSG00000160446	ZDHHC12	zinc finger DHHC-type containing 12 [Source:HGNC Symbol;Acc:HGNC:19159]	18.264	22.462	-0.479446	0.00389937	0.0464683
ENSG00000198517	MAFK	MAF bZIP transcription factor K [Source:HGNC Symbol;Acc:HGNC:6782]	13.444	18.45	-0.618	0.00390561	0.0464683
ENSG00000142871	CYR61	cysteine rich angiogenic inducer 61 [Source:HGNC Symbol;Acc:HGNC:2654]	25.472	57.852	-1.24719	0.00390704	0.0464683
ENSG00000210194	MT-TE	mitochondrially encoded tRNA glutamic acid [Source:HGNC Symbol;Acc:HGNC:7479]	0	0	-1.30289	0.00389623	0.0464683
ENSG00000143256	PFDN2	prefoldin subunit 2 [Source:HGNC Symbol;Acc:HGNC:8867]	57.824	70.306	-0.43757	0.00393242	0.046553
ENSG00000128342	LIF	LIF, interleukin 6 family cytokine [Source:HGNC Symbol;Acc:HGNC:6596]	46.378	69.282	-0.870531	0.0039525	0.0466496
ENSG00000229951	AC104695.2		0.236	1.23	-2.3784	0.00395057	0.0466496
ENSG00000138430	OLA1	Obg like ATPase 1 [Source:HGNC Symbol;Acc:HGNC:28833]	56.228	63.47	-0.35291	0.00398547	0.0466978
ENSG00000115207	GTF3C2	general transcription factor IIIC subunit 2 [Source:HGNC Symbol;Acc:HGNC:4665]	22.234	25.044	-0.371562	0.00396264	0.0466978
ENSG00000172590	MRPL52	mitochondrial ribosomal protein L52 [Source:HGNC Symbol;Acc:HGNC:16655]	47.882	67.638	-0.563917	0.0039843	0.0466978
ENSG00000134333	LDHA	lactate dehydrogenase A [Source:HGNC Symbol;Acc:HGNC:6535]	556.322	679.228	-0.608042	0.00398589	0.0466978
ENSG00000172965	MIR4435-2HG	MIR4435-2 host gene [Source:HGNC Symbol;Acc:HGNC:35163]	45.088	67.602	-0.699435	0.00397146	0.0466978
ENSG00000204588	LINC01123	long intergenic non-protein coding RNA 1123 [Source:HGNC Symbol;Acc:HGNC:49269]	5.686	9.89	-0.942632	0.0039861	0.0466978
ENSG00000144063	MALL	mal, T cell differentiation protein like [Source:HGNC Symbol;Acc:HGNC:6818]	30.14	65.684	-1.34774	0.00399078	0.0466978
ENSG00000189058	APOD	apolipoprotein D [Source:HGNC Symbol;Acc:HGNC:612]	1.934	6.742	-2.4285	0.00396706	0.0466978
ENSG00000179950	PUF60	poly(U) binding splicing factor 60 [Source:HGNC Symbol;Acc:HGNC:17042]	45.86	57.134	-0.477389	0.00399729	0.0467023
ENSG00000116120	FARSB	phenylalanyl-tRNA synthetase beta subunit [Source:HGNC Symbol;Acc:HGNC:17800]	5.826	8.444	-0.687389	0.0040061	0.0467023
ENSG00000143314	MRPL24	mitochondrial ribosomal protein L24 [Source:HGNC Symbol;Acc:HGNC:14037]	43.078	65.014	-0.755422	0.00400766	0.0467023
ENSG00000123843	C4BPB	complement component 4 binding protein beta [Source:HGNC Symbol;Acc:HGNC:1328]	9.686	12.558	-0.518363	0.00401625	0.0467213
ENSG00000144579	CTDSP1	CTD small phosphatase 1 [Source:HGNC Symbol;Acc:HGNC:21614]	34.786	39.178	-0.324795	0.00403324	0.0468262
ENSG00000176058	TPRN	taperin [Source:HGNC Symbol;Acc:HGNC:26894]	12.18	15.206	-0.526911	0.00404103	0.0468674
ENSG00000170827	CELP	carboxyl ester lipase pseudogene [Source:HGNC Symbol;Acc:HGNC:1849]	1.228	5.228	-2.01867	0.00404277	0.0468674
ENSG00000170955	CAVIN3	caveolae associated protein 3 [Source:HGNC Symbol;Acc:HGNC:9400]	6.63	13.32	-1.21165	0.00405057	0.0469231
ENSG00000151465	CDC123	cell division cycle 123 [Source:HGNC Symbol;Acc:HGNC:16827]	49.454	59.47	-0.388086	0.00405724	0.0469657
ENSG00000117143	UAP1	UDP-N-acetylglucosamine pyrophosphorylase 1 [Source:HGNC Symbol;Acc:HGNC:12457]	22.76	30.418	-0.581678	0.00407885	0.0470766
ENSG00000104969	SGTA	small glutamine rich tetratricopeptide repeat containing alpha [Source:HGNC Symbol;Acc:HGNC:10819]	21.882	25.644	-0.412896	0.00408858	0.0471014
ENSG00000140406	TLNRD1	talin rod domain containing 1 [Source:HGNC Symbol;Acc:HGNC:13519]	3.332	4.83	-0.680534	0.00409002	0.0471014
ENSG00000105248	CCDC94	coiled-coil domain containing 94 [Source:HGNC Symbol;Acc:HGNC:25518]	12.432	16.978	-0.604455	0.00409873	0.0471324
ENSG00000113368	LMNB1	lamin B1 [Source:HGNC Symbol;Acc:HGNC:6637]	2.258	3.41	-0.622207	0.00411559	0.0472223
ENSG00000125651	GTF2F1	general transcription factor IIF subunit 1 [Source:HGNC Symbol;Acc:HGNC:4652]	32.01	35.974	-0.348074	0.00414376	0.0472582
ENSG00000132155	RAF1	Raf-1 proto-oncogene, serine/threonine kinase [Source:HGNC Symbol;Acc:HGNC:9829]	32.096	36.144	-0.357698	0.0041532	0.0472582
ENSG00000136718	IMP4	IMP4, U3 small nucleolar ribonucleoprotein [Source:HGNC Symbol;Acc:HGNC:30856]	31.326	48.69	-0.50315	0.00415699	0.0472582
ENSG00000101670	LIPG	lipase G, endothelial type [Source:HGNC Symbol;Acc:HGNC:6623]	7.406	11.944	-0.703865	0.00416511	0.0472582
ENSG00000134697	GNL2	G protein nucleolar 2 [Source:HGNC Symbol;Acc:HGNC:29925]	27.126	40.042	-0.716411	0.00414414	0.0472582
ENSG00000244716	BX679664.3		3.742	5.458	-0.826801	0.00415965	0.0472582
ENSG00000285373	LINC02478	long intergenic non-protein coding RNA 2478 [Source:HGNC Symbol;Acc:HGNC:53446]	4.508	11.744	-1.54836	0.0041491	0.0472582
ENSG00000100473	COCH	cochlin [Source:HGNC Symbol;Acc:HGNC:2180]	3.69	19.616	-2.26388	0.004167	0.0472582
ENSG00000087008	ACOX3	acyl-CoA oxidase 3, pristanoyl [Source:HGNC Symbol;Acc:HGNC:121]	9.916	13.176	-0.566826	0.00417321	0.0472944
ENSG00000133316	WDR74	WD repeat domain 74 [Source:HGNC Symbol;Acc:HGNC:25529]	18.174	26.434	-0.629548	0.00419034	0.0474029
ENSG00000242299	AC073861.1		2.924	5.552	-0.989638	0.00420715	0.0475414
ENSG00000189266	PNRC2	proline rich nuclear receptor coactivator 2 [Source:HGNC Symbol;Acc:HGNC:23158]	85.644	116.182	-0.561825	0.0042116	0.0475574
ENSG00000106682	EIF4H	eukaryotic translation initiation factor 4H [Source:HGNC Symbol;Acc:HGNC:12741]	131.63	152.882	-0.414952	0.00423774	0.047715
ENSG00000205426	KRT81	keratin 81 [Source:HGNC Symbol;Acc:HGNC:6458]	0.866	2.392	-1.71147	0.00423518	0.047715
ENSG00000062485	CS	citrate synthase [Source:HGNC Symbol;Acc:HGNC:2422]	85.54	98.3	-0.358117	0.004271	0.0477264
ENSG00000127922	SEM1	SEM1, 26S proteasome complex subunit [Source:HGNC Symbol;Acc:HGNC:10845]	215.386	251.252	-0.3668	0.00426641	0.0477264
ENSG00000018699	TTC27	tetratricopeptide repeat domain 27 [Source:HGNC Symbol;Acc:HGNC:25986]	6.478	9.144	-0.60723	0.00425741	0.0477264
ENSG00000272141	AL390719.2		4.434	6.414	-0.666967	0.00427228	0.0477264
ENSG00000204767	FAM196B	family with sequence similarity 196 member B [Source:HGNC Symbol;Acc:HGNC:37271]	0.408	0.818	-1.17006	0.00425908	0.0477264
ENSG00000235831	BHLHE40-AS1	BHLHE40 antisense RNA 1 [Source:HGNC Symbol;Acc:HGNC:44471]	0.464	0.956	-1.21552	0.00424415	0.0477264
ENSG00000142507	PSMB6	proteasome subunit beta 6 [Source:HGNC Symbol;Acc:HGNC:9543]	117.168	151.754	-0.501997	0.00430349	0.0478441
ENSG00000184967	NOC4L	nucleolar complex associated 4 homolog [Source:HGNC Symbol;Acc:HGNC:28461]	6.51	8.574	-0.565464	0.00430644	0.0478441
ENSG00000107937	GTPBP4	GTP binding protein 4 [Source:HGNC Symbol;Acc:HGNC:21535]	20.118	28.14	-0.586183	0.00430129	0.0478441
ENSG00000178896	EXOSC4	exosome component 4 [Source:HGNC Symbol;Acc:HGNC:18189]	10.568	13.958	-0.586845	0.00431013	0.0478441
ENSG00000188976	NOC2L	NOC2 like nucleolar associated transcriptional repressor [Source:HGNC Symbol;Acc:HGNC:24517]	28.684	39.928	-0.685981	0.00428803	0.0478441
ENSG00000254285	KRT8P3	keratin 8 pseudogene 3 [Source:HGNC Symbol;Acc:HGNC:31056]	19.066	30.444	-0.96093	0.00431743	0.0478893
ENSG00000123374	CDK2	cyclin dependent kinase 2 [Source:HGNC Symbol;Acc:HGNC:1771]	10.328	12.554	-0.422338	0.00432117	0.0478968
ENSG00000136811	ODF2	outer dense fiber of sperm tails 2 [Source:HGNC Symbol;Acc:HGNC:8114]	8.86	10.342	-0.383151	0.00432753	0.0479334
ENSG00000204394	VARS	valyl-tRNA synthetase [Source:HGNC Symbol;Acc:HGNC:12651]	26.724	37.432	-0.714573	0.00434454	0.047986
ENSG00000145220	LYAR	Ly1 antibody reactive [Source:HGNC Symbol;Acc:HGNC:26021]	5.428	9.842	-0.965806	0.00434041	0.047986
ENSG00000065978	YBX1	Y-box binding protein 1 [Source:HGNC Symbol;Acc:HGNC:8014]	298.672	337.548	-0.350289	0.00435382	0.0480063
ENSG00000126254	RBM42	RNA binding motif protein 42 [Source:HGNC Symbol;Acc:HGNC:28117]	19.376	24.528	-0.486063	0.00435351	0.0480063
ENSG00000183386	FHL3	four and a half LIM domains 3 [Source:HGNC Symbol;Acc:HGNC:3704]	7.528	11.684	-0.825508	0.00435582	0.0480063
ENSG00000165271	NOL6	nucleolar protein 6 [Source:HGNC Symbol;Acc:HGNC:19910]	10.584	14.168	-0.570015	0.00437697	0.0481405
ENSG00000159176	CSRP1	cysteine and glycine rich protein 1 [Source:HGNC Symbol;Acc:HGNC:2469]	104.94	125.812	-0.438537	0.00438306	0.0481673
ENSG00000164111	ANXA5	annexin A5 [Source:HGNC Symbol;Acc:HGNC:543]	310.474	368.492	-0.415946	0.00440099	0.0482353
ENSG00000227097	RPS28P7	ribosomal protein S28 pseudogene 7 [Source:HGNC Symbol;Acc:HGNC:35787]	4.456	5.142	-0.725694	0.00439916	0.0482353
ENSG00000120699	EXOSC8	exosome component 8 [Source:HGNC Symbol;Acc:HGNC:17035]	19.932	24.092	-0.430363	0.00440467	0.0482419
ENSG00000174243	DDX23	DEAD-box helicase 23 [Source:HGNC Symbol;Acc:HGNC:17347]	42.31	44.718	-0.309095	0.00441915	0.0482655
ENSG00000107833	NPM3	nucleophosmin/nucleoplasmin 3 [Source:HGNC Symbol;Acc:HGNC:7931]	17.084	21.584	-0.507976	0.00444018	0.0483826
ENSG00000171345	KRT19	keratin 19 [Source:HGNC Symbol;Acc:HGNC:6436]	237.678	461.558	-0.976204	0.00443632	0.0483826
ENSG00000176087	SLC35A4	solute carrier family 35 member A4 [Source:HGNC Symbol;Acc:HGNC:20753]	48.048	57.894	-0.367686	0.0044875	0.0484768
ENSG00000198742	SMURF1	SMAD specific E3 ubiquitin protein ligase 1 [Source:HGNC Symbol;Acc:HGNC:16807]	18.364	21.528	-0.411443	0.00446126	0.0484768
ENSG00000011304	PTBP1	polypyrimidine tract binding protein 1 [Source:HGNC Symbol;Acc:HGNC:9583]	97.22	113.43	-0.436195	0.00448212	0.0484768
ENSG00000104856	RELB	RELB proto-oncogene, NF-kB subunit [Source:HGNC Symbol;Acc:HGNC:9956]	11.032	13.68	-0.485874	0.00448245	0.0484768
ENSG00000107815	TWNK	twinkle mtDNA helicase [Source:HGNC Symbol;Acc:HGNC:1160]	4.882	6.344	-0.489946	0.0044586	0.0484768
ENSG00000120937	NPPB	natriuretic peptide B [Source:HGNC Symbol;Acc:HGNC:7940]	1.174	5.502	-2.23875	0.00448802	0.0484768
ENSG00000137440	FGFBP1	fibroblast growth factor binding protein 1 [Source:HGNC Symbol;Acc:HGNC:19695]	5.9	48.578	-3.21978	0.00447844	0.0484768
ENSG00000114738	MAPKAPK3	mitogen-activated protein kinase-activated protein kinase 3 [Source:HGNC Symbol;Acc:HGNC:6888]	20.994	24.246	-0.362867	0.00451441	0.0486191
ENSG00000067182	TNFRSF1A	TNF receptor superfamily member 1A [Source:HGNC Symbol;Acc:HGNC:11916]	83.152	99.12	-0.386744	0.00451982	0.0486191
ENSG00000131620	ANO1	anoctamin 1 [Source:HGNC Symbol;Acc:HGNC:21625]	3.514	4.19	-0.538448	0.00451793	0.0486191
ENSG00000091127	PUS7	pseudouridylate synthase 7 (putative) [Source:HGNC Symbol;Acc:HGNC:26033]	5.568	8.348	-0.80071	0.00452523	0.0486303
ENSG00000087087	SRRT	serrate, RNA effector molecule [Source:HGNC Symbol;Acc:HGNC:24101]	32.036	38.83	-0.474138	0.00454922	0.0486748
ENSG00000178982	EIF3K	eukaryotic translation initiation factor 3 subunit K [Source:HGNC Symbol;Acc:HGNC:24656]	181.926	207.402	-0.346055	0.004559	0.048706
ENSG00000181524	RPL24P4	ribosomal protein L24 pseudogene 4 [Source:HGNC Symbol;Acc:HGNC:21371]	5.93	9.84	-0.83489	0.00455799	0.048706
ENSG00000131462	TUBG1	tubulin gamma 1 [Source:HGNC Symbol;Acc:HGNC:12417]	20.154	24.828	-0.433238	0.00457051	0.0487293
ENSG00000184428	TOP1MT	DNA topoisomerase I mitochondrial [Source:HGNC Symbol;Acc:HGNC:29787]	7.508	8.924	-0.451317	0.00456957	0.0487293
ENSG00000102024	PLS3	plastin 3 [Source:HGNC Symbol;Acc:HGNC:9091]	55.594	66.168	-0.401474	0.00457674	0.0487616
ENSG00000178921	PFAS	phosphoribosylformylglycinamidine synthase [Source:HGNC Symbol;Acc:HGNC:8863]	5.726	7.484	-0.671427	0.004586	0.0487616
ENSG00000111639	MRPL51	mitochondrial ribosomal protein L51 [Source:HGNC Symbol;Acc:HGNC:14044]	89.224	100.734	-0.355675	0.00460266	0.0488725
ENSG00000178952	TUFM	Tu translation elongation factor, mitochondrial [Source:HGNC Symbol;Acc:HGNC:12420]	70.838	82.154	-0.349288	0.00460754	0.0488871
ENSG00000030066	NUP160	nucleoporin 160 [Source:HGNC Symbol;Acc:HGNC:18017]	12.998	16.29	-0.422322	0.00462452	0.0488871
ENSG00000113643	RARS	arginyl-tRNA synthetase [Source:HGNC Symbol;Acc:HGNC:9870]	40.162	47.326	-0.423639	0.00462718	0.0488871
ENSG00000148841	ITPRIP	inositol 1,4,5-trisphosphate receptor interacting protein [Source:HGNC Symbol;Acc:HGNC:29370]	4.16	5.292	-0.508459	0.00462364	0.0488871
ENSG00000144895	EIF2A	eukaryotic translation initiation factor 2A [Source:HGNC Symbol;Acc:HGNC:3254]	73.546	96.18	-0.563799	0.00462901	0.0488871
ENSG00000114767	RRP9	ribosomal RNA processing 9, U3 small nucleolar RNA binding protein [Source:HGNC Symbol;Acc:HGNC:16829]	7.952	12.876	-0.792624	0.00461976	0.0488871
ENSG00000165244	ZNF367	zinc finger protein 367 [Source:HGNC Symbol;Acc:HGNC:18320]	0.618	1.042	-0.993276	0.00461824	0.0488871
ENSG00000172927	MYEOV	myeloma overexpressed [Source:HGNC Symbol;Acc:HGNC:7563]	1.6	2.85	-1.10786	0.00463788	0.0489318
ENSG00000105825	TFPI2	tissue factor pathway inhibitor 2 [Source:HGNC Symbol;Acc:HGNC:11761]	149.646	376.106	-1.18544	0.00465759	0.0489842
ENSG00000128510	CPA4	carboxypeptidase A4 [Source:HGNC Symbol;Acc:HGNC:15740]	14.66	62.636	-3.18051	0.00465639	0.0489842
ENSG00000130204	TOMM40	translocase of outer mitochondrial membrane 40 [Source:HGNC Symbol;Acc:HGNC:18001]	16.094	21.648	-0.591101	0.00468007	0.0491282
ENSG00000185483	ROR1	receptor tyrosine kinase like orphan receptor 1 [Source:HGNC Symbol;Acc:HGNC:10256]	5.456	6.76	-0.546561	0.00470193	0.0493245
ENSG00000171425	ZNF581	zinc finger protein 581 [Source:HGNC Symbol;Acc:HGNC:25017]	7.388	9.31	-0.48366	0.00471907	0.0494123
ENSG00000174775	HRAS	HRas proto-oncogene, GTPase [Source:HGNC Symbol;Acc:HGNC:5173]	20.398	28.95	-0.629466	0.00471976	0.0494123
ENSG00000229638	RPL4P4	ribosomal protein L4 pseudogene 4 [Source:HGNC Symbol;Acc:HGNC:36179]	1.492	2.44	-0.724554	0.00473446	0.0495001
ENSG00000140254	DUOXA1	dual oxidase maturation factor 1 [Source:HGNC Symbol;Acc:HGNC:26507]	0.592	1.734	-1.77014	0.00473342	0.0495001
ENSG00000147274	RBMX	RNA binding motif protein, X-linked [Source:HGNC Symbol;Acc:HGNC:9910]	101.72	139.442	-0.587939	0.00474207	0.0495466
ENSG00000115307	AUP1	AUP1, lipid droplet regulating VLDL assembly factor [Source:HGNC Symbol;Acc:HGNC:891]	67.488	82.612	-0.429858	0.00477358	0.0497099
ENSG00000116690	PRG4	proteoglycan 4 [Source:HGNC Symbol;Acc:HGNC:9364]	17.016	34.398	-1.29032	0.00476607	0.0497099
ENSG00000136305	CIDEB	cell death-inducing DFFA-like effector b [Source:HGNC Symbol;Acc:HGNC:1977]	3.958	8.406	-1.01552	0.00477945	0.0497148
ENSG00000180992	MRPL14	mitochondrial ribosomal protein L14 [Source:HGNC Symbol;Acc:HGNC:14279]	29.3	35.128	-0.42518	0.00482043	0.0499653
ENSG00000173692	PSMD1	proteasome 26S subunit, non-ATPase 1 [Source:HGNC Symbol;Acc:HGNC:9554]	45.762	56.34	-0.4694	0.00481818	0.0499653
ENSG00000130305	NSUN5	NOP2/Sun RNA methyltransferase family member 5 [Source:HGNC Symbol;Acc:HGNC:16385]	10.068	12.714	-0.48931	0.00482004	0.0499653
ENSG00000214113	LYRM4	LYR motif containing 4 [Source:HGNC Symbol;Acc:HGNC:21365]	9.522	11.856	-0.505113	0.00481116	0.0499653
ENSG00000142273	CBLC	Cbl proto-oncogene C [Source:HGNC Symbol;Acc:HGNC:15961]	7.296	14.158	-1.00587	0.00481614	0.0499653
ENSG00000182718	ANXA2	annexin A2 [Source:HGNC Symbol;Acc:HGNC:537]	983.398	1392.38	-0.627207	0.00482541	0.0499839
