# Supplementary material for: Recovery of human type 2 diabetes beta cell function associates with transcriptomic signatures that point to novel therapeutic targets
Source: Research Square preprint supplement (doi:10.21203/rs.3.rs-871924/v1), 2021-09-03
Supplement: Supplementary file 11 [file 7541aca32f3d8c56afd500bc.xlsx]

## Sheet: Positively enriched
Table S7a. GSEA analysis result showed many GO biological processes with significant positive enrichment in "cultured" vs "basal" islet transcriptomes
TERM	pval	padj	log2err	ES	NES	size	leadingEdge	Group	Unique/Shared
GO_CELLULAR_MODIFIED_AMINO_ACID_METABOLIC_PROCESS	7.39516e-07	4.79322e-05	0.659444	0.555383	1.99423	96	CTSK, HPN, GSTM2, PCYOX1, GCNT4, GGH, FOLR1, CKMT1A, HOGA1, MBOAT1, DUOX2, ASS1, LPCAT4, SERINC2, GSTK1, GGT1, DUOXA2, IDH1, ABHD12, GCLC, GSTM1, CKMT1B, GAMT, PLA2G2A, ALDH4A1, HPGDS, CTSB, GPX4, CRAT, VNN2, CARNMT1, GSTM3, PCYOX1L, GSTA2, PDZD11, ALDH9A1, DHFR, CNDP2, SHMT1, CROT, SOD1, TYMS, SLC16A2, CPT1A, SLC16A10, TMLHE	Improvers	Shared
GO_SPHINGOLIPID_METABOLIC_PROCESS	2.04687e-05	0.000680308	0.57561	0.498536	1.82011	106	ASAH1, GM2A, CTSA, HEXA, HEXB, HACD4, FUT6, ST3GAL5, ASAH2, PPM1L, HACD3, ARSA, PRKCD, CERS6, SPNS2, P2RX7, SUMF2, SERINC2, NEU1, PLPP2, B3GALNT1, GALC, CERS2, NAGA, STS, HACD2, CLN8, PLA2G15, ACER3, SGPP2, PLA2G6, PSAP, SGPP1, ST8SIA5, CERS4, ESYT3, ST8SIA1, TECR, SPTSSA	Improvers	Shared
GO_ANTIGEN_PROCESSING_AND_PRESENTATION_OF_PEPTIDE_OR_POLYSACCHARIDE_ANTIGEN_VIA_MHC_CLASS_II	3.54917e-05	0.0010691	0.557332	0.570948	1.94195	63	CTSD, HLA-DPA1, HLA-DRA, HLA-DRB1, HLA-DOA, HLA-DMB, HLA-DMA, HLA-DPB1, HLA-DRB5, CTSF, HLA-DQA1, CD74, KIF3C, DYNLL2	Improvers	Shared
GO_RESPONSE_TO_XENOBIOTIC_STIMULUS	3.59711e-05	0.0010691	0.557332	0.579596	1.94308	58	CES1, UGT1A1, UGT2B15, SULT1A1, GSTM2, UGT1A6, ACY3, RORC, CYP2U1, CMBL, CYP2C8, CYP2J2, GGT1, GCLC, GSTM1, RORA, TIGAR, CES3, NAT1, ACSL1, BPHL, GSTM3	Improvers	Shared
GO_CARBOHYDRATE_METABOLIC_PROCESS	4.26987e-05	0.00124511	0.557332	0.358295	1.52127	378	PPARGC1A, UGT1A1, CHI3L1, GM2A, UGT2B15, HEXA, SIAE, ST6GALNAC1, SLC3A1, UGT2A3, IGF1, HEXB, G6PC, UGT1A6, SLC4A4, SDS, PFKFB2, CHST4, FUT6, ST3GAL5, GCNT4, MST1, GCG, RORC, AMDHD2, SLC2A1, LEPR, KLB, NPL, GLB1L3, MAN2B2, PDX1, OMA1, FUT9, ONECUT1, B3GAT1, GNPTG, SLC5A3, ABO, GPT, P2RX7, SLC35A1, FUT1, PTEN, NEU1, PPP1R3E, ANGPTL3, GALT, AVPR1B, B3GALNT1, POMT1, PFKFB4, IDH1, ISYNA1, GCLC, ALDOB,…	Improvers	Shared
GO_SMALL_MOLECULE_CATABOLIC_PROCESS	5.03934e-05	0.00137846	0.557332	0.382871	1.56093	269	PAH, SULT1A1, HEXA, PHYH, PCYOX1, ENTPD8, HEXB, HAO1, UPB1, SDS, PFKFB2, FUT6, HGD, MCCC1, GLYATL2, AMDHD2, RENBP, ADA2, HOGA1, QPRT, HIBADH, NPL, LDHD, ACAD10, FUT9, APOBEC3C, SCARB1, HPGD, GPT, BDH1, FUT1, PTEN, HMGCL, AADAT, GALT, ACBD5, ALDOB, ADO, ABAT, ACOX2, RIDA, GNPDA1, PLA2G15, ALDH2, PGK1, IDUA, DBT, ALDH4A1, DECR1, ALDOC, TIGAR, ACADSB, MAT1A, ACOX1, SRD5A3, DDO, OCRL, BCAT2, TST, CDO…	Improvers	Unique
GO_MEMBRANE_LIPID_METABOLIC_PROCESS	5.3127e-05	0.00144049	0.557332	0.454522	1.70975	136	ASAH1, GM2A, CTSA, HEXA, HEXB, HACD4, FUT6, ST3GAL5, ASAH2, PPM1L, HACD3, ARSA, PRKCD, CERS6, SPNS2, P2RX7, SUMF2, SERINC2, NEU1, PLPP2, B3GALNT1, GALC, CERS2, NAGA, STS, HACD2, CLN8, PLA2G15, ACER3, SGPP2, PLA2G6, PSAP, SGPP1, GAL3ST4, ST8SIA5, PIGX, CERS4, ESYT3, ST8SIA1, FUT2, TECR, PIGK, SPTSSA	Improvers	Shared
GO_LIPID_BIOSYNTHETIC_PROCESS	5.4985e-05	0.0014779	0.557332	0.344831	1.47335	436	BAAT, CES1, PPARGC1A, ASAH1, HSD17B2, FAXDC2, IGFBP7, SCD5, NR1H4, GSTM2, SERAC1, CDS1, HSD17B14, PLD1, HEXB, CD74, HACD4, ST3GAL5, ASAH2, SLC44A3, PLEKHA2, FGF19, ACHE, TSPOAP1, PLCE1, PPM1L, HACD3, OSBPL6, CEACAM1, MBOAT1, HSD17B12, CHPT1, DGKE, CRH, PRKCD, SH3YL1, SLC44A4, CERS6, LPCAT4, SCARB1, PIK3R1, HPGD, P2RX7, PTEN, CYP2C8, PLPP2, TM7SF2, CLCN2, PROX1, IDH1, ISYNA1, ACOX2, GSTM1, CERS2, …	Improvers	Unique
GO_OLIGOSACCHARIDE_METABOLIC_PROCESS	9.72383e-05	0.00244361	0.538434	0.682702	1.95303	29	GM2A, ST6GALNAC1, HEXB, SLC2A1, MAN2B2, NEU1, B3GALNT1, NAGA, IDUA, MANBA, MAN2B1, GAL3ST4, ST8SIA5, ST8SIA1	Improvers	Shared
GO_MONOCARBOXYLIC_ACID_METABOLIC_PROCESS	0.000106885	0.00260144	0.538434	0.352332	1.49299	370	BAAT, CES1, PPARGC1A, UGT1A1, UGT2B15, PHYH, SCD5, NR1H4, GSTM2, UGT2A3, IGF1, UGT1A6, HAO1, CD74, SLC4A4, HACD4, SDS, PFKFB2, ASAH2, FGF19, MCCC1, BTD, GLYATL2, SLC16A3, CKMT1A, HACD3, HOGA1, ZADH2, OSBPL6, CEACAM1, LDHD, HSD17B12, ACAD10, CYP2U1, HPGD, PDHX, P2RX7, ADH1C, CYP2C8, ANGPTL3, CYP2J2, GGT1, ACBD5, PDP2, PFKFB4, PROX1, IDH1, ALDOB, ABAT, ACOX2, GSTM1, ZBTB7A, EPHX2, DHTKD1, ADH6, PON…	Improvers	Shared
GO_ORGANIC_HYDROXY_COMPOUND_METABOLIC_PROCESS	0.000135088	0.00309951	0.518848	0.363844	1.50542	308	BAAT, CES1, ASAH1, CTSK, NPC2, PAH, SULT1A1, HPN, FAXDC2, GPR37, NR1H4, IGF1, HAO1, PFKFB2, ASAH2, FGF19, GCNT4, ITGB2, PLCE1, LEPR, OSBPL6, LDHD, DUOX2, SCARB1, SLC5A3, FMO5, PTEN, ADH1C, CYP2C8, ANGPTL3, PLPP2, TM7SF2, DUOXA2, AVPR1B, CLCN2, PROX1, IDH1, ISYNA1, ABAT, ACOX2, SC5D, EPHX2, P2RY1, ADH6, PLCH2, CLN8, ALDH2, ACER3, PLEK, SGPP2, RNF180, TIGAR, OSBPL9, SGPP1, CTSB, SRD5A3, GPER1, SOAT…	Improvers	Shared
GO_LOCOMOTORY_BEHAVIOR	0.000135372	0.00309951	0.518848	0.472706	1.72581	106	SELENOP, GPR37, HEXB, ADCY5, CELSR1, ARRB2, SLC18A2, CRH, LRRK2, PBX3, CSTB, PTEN, EPHA4, GLRA1, ABHD12, ASTN1, ABAT, ZNF385A, APBA1, PAK5, PPP3CB, SLITRK6, CHL1, NTAN1, HPGDS, FIG4, PSAP, KCND2, GLRB, MECP2, DAB1, TSC1, SPG11, FGF12, APOE, APH1B, FXN, SLC4A10, VPS35, NCOA2, PPT1, CIART, WDR47, DSCAM, NEGR1, SOD1, NLGN2, ANKH, GNAO1, OPRD1, VPS13A	Improvers	Shared
GO_ORGANIC_ACID_CATABOLIC_PROCESS	0.000157273	0.00343825	0.518848	0.412695	1.59197	171	PAH, HEXA, PHYH, PCYOX1, HEXB, HAO1, SDS, HGD, MCCC1, GLYATL2, AMDHD2, RENBP, HOGA1, QPRT, HIBADH, NPL, LDHD, ACAD10, HPGD, GPT, HMGCL, AADAT, ACBD5, ADO, ABAT, ACOX2, RIDA, GNPDA1, PLA2G15, IDUA, DBT, ALDH4A1, DECR1, ACADSB, MAT1A, ACOX1, DDO, BCAT2, TST, CDO1, GOT1, LPIN2, ARG2, SCP2, CRAT, FAAH, OAT, CTH, DDAH2, AASS, CARNMT1, ABCD4, PCYOX1L	Improvers	Shared
GO_T_CELL_PROLIFERATION	0.000157383	0.00343825	0.518848	0.470447	1.71756	106	HLA-DPA1, HLA-DRB1, HLA-DMB, GPNMB, HLA-DPB1, TNFRSF14, IGF1, TNFSF13B, VSIG4, IGFBP2, CD1D, HAVCR2, AIF1, SPN, CD209, LGALS9, NCKAP1L, PTPN22, CD24, LILRB2, RAC2, PTPRC, NCK1, P2RX7, DOCK8, CD81, PPP3CB, SYK, VSIR, CD46, PRKAR1A, BTN2A2	Improvers	Unique
GO_GLYCOSPHINGOLIPID_METABOLIC_PROCESS	0.000183266	0.00385357	0.518848	0.581645	1.84831	47	ASAH1, GM2A, CTSA, HEXA, HEXB, ST3GAL5, ARSA, PRKCD, SUMF2, NEU1, B3GALNT1, GALC, NAGA, STS, PSAP, ST8SIA5, ESYT3, ST8SIA1	Improvers	Shared
GO_LIPID_CATABOLIC_PROCESS	0.000267136	0.00516072	0.498493	0.397644	1.55819	190	CES1, ASAH1, ADRA2A, GM2A, HEXA, PHYH, HSD17B14, PLD1, HEXB, HAO1, ASAH2, PLA2G7, GLYATL2, SIRT2, PLCE1, ACAD10, PRKCD, SCARB1, HPGD, RARRES2, NEU1, ANGPTL3, ACBD5, IDH1, ABHD12, PLBD1, ACOX2, GALC, NAGA, STS, PLCH2, PLA2G15, PLA2G2A, ACER3, PLA2G6, PSAP, DECR1, ACOX1, SRD5A3, GDPD1, IAH1, LPIN2, BCO2, CES3, SCP2, DDHD1, CRAT, PAFAH2, AKR1B10, FAAH, PLCG1, APOE, ABCD4, BCO1, CYP24A1, PLCB4, NAPEP…	Improvers	Shared
GO_HORMONE_METABOLIC_PROCESS	0.000328486	0.00597265	0.498493	0.471968	1.70585	99	CES1, PPARGC1A, UGT1A1, CTSK, HSD17B2, SULT1A1, HPN, HSD17B14, GCNT4, TSPOAP1, DUOX2, HSD17B12, PCSK4, ATP6AP2, SCARB1, ADH1C, CYP2C8, TCF7L2, DUOXA2, CLCN2, ADH6, CTSB, SRD5A3, CHST9, DDO, FDXR, RDH12, BCO2, H6PD, AKR1B10, ENPEP, CTSZ, BCO1, TTR, FDX1, DHRS3, HFE, ALDH9A1, STARD3	Improvers	Shared
GO_STEROID_METABOLIC_PROCESS	0.000423617	0.00707783	0.498493	0.400609	1.56132	180	BAAT, CES1, PPARGC1A, UGT1A1, ASAH1, HSD17B2, NPC2, UGT2B15, SULT1A1, FAXDC2, IGFBP7, NR1H4, HSD17B14, G6PC, FGF19, TSPOAP1, RORC, LEPR, OSBPL6, HSD17B12, CRH, AGT, SCARB1, FMO5, CYP2C8, ANGPTL3, TM7SF2, CLCN2, PROX1, ACOX2, SC5D, EPHX2, STS, CLN8, RORA, OSBPL9, SRD5A3, SOAT1, MECP2, GGPS1, FDXR, SCP2, OSBPL3, PRLR, HSD11B2, H6PD, NFYB	Improvers	Unique
GO_NEGATIVE_REGULATION_OF_LEUKOCYTE_CELL_CELL_ADHESION	0.000454354	0.00755058	0.498493	0.512608	1.75477	67	HLA-DRB1, GPNMB, FGL2, TNFRSF14, DTX1, VSIG4, CD74, HAVCR2, SPN, LGALS9, PTPN22, CEACAM1, LILRB2, ASS1, VSIR, SOCS6, PRKAR1A, BTN2A2, ARG2, HLA-G, TWSG1, WNK1, RC3H1, SOCS5, LGALS3, HFE, PTPN6	Improvers	Shared
GO_DETECTION_OF_BIOTIC_STIMULUS	0.000481789	0.00771611	0.498493	0.759375	1.88401	16	HLA-DRB1, DMBT1, CD1D, SCARB1, C4B, PAK1, PTPRJ, NAIP, SSC5D, HLA-B, FAP, CDHR2	Improvers	Shared
GO_POSITIVE_REGULATION_OF_INSULIN_SECRETION	0.000555739	0.00854622	0.477271	0.546028	1.80668	55	HLA-DRB1, NR1H4, PFKFB2, GCG, UCN3, CRH, PDX1, JAK2, TCF7L2, TM7SF3, FFAR1, ABAT, NKX6-1, PPP3CB, PLA2G6, CLTRN, GPER1	Improvers	Unique
GO_REGULATION_OF_T_CELL_ACTIVATION	0.000561209	0.00858761	0.477271	0.385973	1.49808	173	HLA-DPA1, HLA-DRB1, HLA-DOA, HLA-DMB, GPNMB, HLA-DPB1, FGL2, TNFRSF14, IGF1, DTX1, TNFSF13B, VSIG4, IGFBP2, CD1D, CD74, HAVCR2, AIF1, SPN, CD209, LGALS9, NCKAP1L, PTPN22, CD24, CEACAM1, LILRB2, RAC2, PTPRC, PIK3R1, NCK1, DOCK8, LEF1, THY1, CD81, PAK1, SYK, ZBTB1, VSIR, SOCS6, CD46, PRKAR1A, BTN2A2	Improvers	Unique
GO_MEMBRANE_LIPID_CATABOLIC_PROCESS	0.000627435	0.00934754	0.477271	0.652685	1.82217	26	ASAH1, GM2A, HEXA, HEXB, ASAH2, PRKCD, NEU1, GALC, NAGA, ACER3, PSAP	Improvers	Unique
GO_HUMORAL_IMMUNE_RESPONSE_MEDIATED_BY_CIRCULATING_IMMUNOGLOBULIN	0.000900292	0.0120991	0.477271	0.638114	1.82547	29	HLA-DRB1, C6, C1QB, C1QA, SERPING1, C2, C8A, PTPRC, C4B, C1S, C4BPA, CD81, C5, C3, CD46, C4A	Improvers	Unique
GO_CELLULAR_LIPID_CATABOLIC_PROCESS	0.000931277	0.0123544	0.477271	0.409093	1.53765	138	ASAH1, GM2A, HEXA, PHYH, HEXB, HAO1, ASAH2, PLA2G7, GLYATL2, SIRT2, ACAD10, PRKCD, SCARB1, HPGD, NEU1, ANGPTL3, ACBD5, IDH1, ABHD12, PLBD1, ACOX2, GALC, NAGA, PLA2G15, ACER3, PLA2G6, PSAP, DECR1, ACOX1, SRD5A3, GDPD1, LPIN2, BCO2, SCP2, CRAT, AKR1B10, FAAH, PLCG1, ABCD4, BCO1, NAPEPLD, HADHB, PDXDC1, PIK3CG, PPT1, ECHDC2, LIPH, ABHD6, PCCB, CROT, LRP1, FUCA1, CPT1A, SGPL1, MLYCD, PLA2G4F, ASAH2B,…	Improvers	Shared
GO_LIPOSACCHARIDE_METABOLIC_PROCESS	0.000988898	0.0129715	0.45506	0.476603	1.6605	77	ASAH1, GM2A, CTSA, HEXA, HEXB, ST3GAL5, ARSA, PRKCD, SUMF2, NEU1, B3GALNT1, GALC, NAGA, STS, PSAP, GAL3ST4, ST8SIA5, PIGX, ESYT3, ST8SIA1, FUT2, PIGK	Improvers	Shared
GO_PHOTORECEPTOR_CELL_MAINTENANCE	0.000995341	0.0129716	0.45506	0.688681	1.83585	21	PROM1, SLC2A1, BBS2, TUB, LCA5, SPATA7, RDH12, ERCC6, NPHP3, CRB1, MKKS, BBS10, ATP1B2, USP45, USH1C	Improvers	Unique
GO_ADAPTIVE_IMMUNE_RESPONSE	0.00100387	0.0129716	0.45506	0.368441	1.45184	203	HLA-DPA1, CLEC10A, HLA-DRA, LILRB5, HLA-DRB1, C6, HLA-DOA, HLA-DMB, HLA-DMA, C1QB, HLA-DPB1, FGL2, C1QA, TNFRSF14, HLA-DRB5, TNFSF13B, HLA-DQA1, CD1D, CD74, HAVCR2, SPN, CD209, SERPING1, RORC, C2, CEACAM1, ADCY7, LILRB2, SIGLEC10, STX7, C8A, JAK2, PRKCD, PTPRC, TEC, P2RX7, DENND1B, C4B, C1S, SEMA4A, C4BPA, LEF1, WAS, CD81, PPP3CB, C5, SYK, RORA, ZBTB1, CD84	Improvers	Unique
GO_NEGATIVE_REGULATION_OF_T_CELL_PROLIFERATION	0.00113198	0.014052	0.45506	0.616985	1.82255	33	HLA-DRB1, GPNMB, TNFRSF14, VSIG4, HAVCR2, SPN, LGALS9, LILRB2, VSIR, PRKAR1A, BTN2A2, ARG2, HLA-G, TWSG1, RC3H1, PTPN6	Improvers	Shared
GO_LEUKOCYTE_CELL_CELL_ADHESION	0.00119238	0.0145987	0.45506	0.371784	1.45899	193	HLA-DPA1, HLA-DRB1, HLA-DMB, GPNMB, HLA-DPB1, FGL2, ITGB7, TNFRSF14, CERCAM, IGF1, DTX1, TNFSF13B, VSIG4, IGFBP2, CD1D, CD74, HAVCR2, AIF1, ITGB2, SPN, CD209, LGALS9, NCKAP1L, PODXL2, PTPN22, CD24, CEACAM1, LILRB2, ASS1, RAC2, FUT9, PTPRC, PIK3R1, NCK1, DOCK8, LEF1, THY1, CD81, PAK1, SYK, ZBTB1, VSIR, SOCS6, CD46, PRKAR1A, BTN2A2	Improvers	Unique
GO_PHOSPHATIDYLCHOLINE_METABOLIC_PROCESS	0.00125272	0.0150668	0.45506	0.54977	1.72864	45	CDS1, SLC44A3, ACHE, PLA2G7, MBOAT1, CHPT1, SLC44A4, LPCAT4, SCARB1, PLBD1, PLA2G15, PLA2G2A, CEPT1, PLA2G6, MECP2, SLC44A1, LPIN2	Improvers	Unique
GO_REGULATION_OF_EXOCYTOSIS	0.00132144	0.0158316	0.45506	0.414027	1.53767	127	ADRA2A, HAP1, RAB26, SYT8, RAB27B, SDC1, ITGB2, LGALS9, CEACAM1, LRRK2, RAC2, MICAL1, ADCY1, FBXL20, SYT13, APBA1, P2RY1, SYK, RAB15, FMR1, PLA2G6, CD84, CLTRN, STXBP6, RAB3A, RAB8B, VPS18, RALA, SYT7	Improvers	Shared
GO_REGULATION_OF_HUMORAL_IMMUNE_RESPONSE	0.00144516	0.0168566	0.45506	0.577391	1.7551	36	C6, C1QB, C1QA, VSIG4, CFH, SERPING1, A2M, C2, C8A, PTPRC, SPNS2, C4B, C1S, C4BPA, CFB, CD81, C5, C3, CD46, C4A	Improvers	Unique
GO_CERAMIDE_METABOLIC_PROCESS	0.001525	0.0173369	0.45506	0.490838	1.66948	63	ASAH1, GM2A, HEXA, HEXB, FUT6, ST3GAL5, ASAH2, PRKCD, CERS6, P2RX7, NEU1, PLPP2, GALC, CERS2, NAGA, CLN8, PLA2G15, ACER3, PLA2G6, PSAP	Improvers	Shared
GO_COMPLEMENT_ACTIVATION	0.00169328	0.0186951	0.45506	0.606451	1.79143	33	C6, C1QB, C1QA, VSIG4, CFH, SERPING1, A2M, C2, C8A, MASP1, C4B, C1S, C4BPA, CFB, CD81, C5, C3, CD46, C4A	Improvers	Unique
GO_PHENOL_CONTAINING_COMPOUND_METABOLIC_PROCESS	0.00169351	0.0186951	0.45506	0.541109	1.75296	49	CTSK, PAH, SULT1A1, HPN, GPR37, GCNT4, ITGB2, DUOX2, DUOXA2, ABAT, RNF180, CTSB, TPH1, DDC, PMEL, BCL2, FAH, VPS35, AOC2, MAOB, SLC16A2, SLC16A10	Improvers	Unique
GO_CELLULAR_AMINO_ACID_CATABOLIC_PROCESS	0.00171442	0.0188586	0.45506	0.476657	1.64888	72	PAH, PCYOX1, SDS, HGD, MCCC1, HOGA1, HIBADH, GPT, HMGCL, AADAT, ADO, ABAT, RIDA, DBT, ALDH4A1, ACADSB, MAT1A, DDO, BCAT2, TST, CDO1, GOT1, ARG2, OAT, CTH, DDAH2, AASS, CARNMT1, PCYOX1L, MCCC2, PCBD1	Improvers	Unique
GO_POSITIVE_REGULATION_OF_T_CELL_PROLIFERATION	0.00178609	0.0195314	0.45506	0.528486	1.71734	50	HLA-DPA1, HLA-DMB, HLA-DPB1, IGF1, TNFSF13B, IGFBP2, CD1D, HAVCR2, AIF1, CD209, LGALS9, NCKAP1L, PTPN22, CD24, LILRB2, PTPRC, NCK1	Improvers	Unique
GO_BILE_ACID_METABOLIC_PROCESS	0.00192101	0.0206893	0.45506	0.61565	1.76121	29	BAAT, CES1, NR1H4, FGF19, OSBPL6, PROX1, ACOX2, OSBPL9, SCP2, OSBPL3, ATP8B1, OSBPL2, CYP27A1	Improvers	Shared
GO_BILE_ACID_BIOSYNTHETIC_PROCESS	0.002154	0.0224176	0.431708	0.63444	1.73902	24	BAAT, CES1, NR1H4, FGF19, OSBPL6, PROX1, ACOX2, OSBPL9, SCP2, OSBPL3	Improvers	Shared
GO_HUMORAL_IMMUNE_RESPONSE	0.00217118	0.0225205	0.431708	0.436358	1.57444	101	LYZ, CXCL9, HLA-DRB1, C6, C1QB, DMBT1, C1QA, WFDC2, RNASE6, VSIG4, CFH, SERPING1, TF, A2M, C2, C8A, MASP1, BLNK, DEFB1, PTPRC, SPNS2, C4B, RARRES2, C1S, C4BPA, CFB, CD81, C5, RBPJ, PLA2G2A, SLPI, ANG, PLA2G6, POU2AF1, C3, CD46	Improvers	Unique
GO_CARBOHYDRATE_DERIVATIVE_CATABOLIC_PROCESS	0.0024896	0.0245858	0.431708	0.411258	1.50977	115	CHI3L1, LUM, GM2A, HEXA, HEXB, SDC1, UPB1, AMDHD2, RENBP, ADA2, FBXO44, PDE8B, NPL, PRKCD, GNS, APOBEC3C, NEU1, GALT, SDC3, GALC, SAMHD1, NAGA, HPSE, GNPDA1, IDUA, PSAP, MANBA, PRELP, FBXO27	Improvers	Unique
GO_REGULATION_OF_IMMUNE_RESPONSE	0.00278707	0.0266713	0.431708	0.310399	1.3271	435	AMBP, PIGR, HLA-DPA1, CLEC10A, HLA-DRA, HLA-DRB1, C6, HLA-DMB, JAML, C1QB, HLA-DPB1, FGL2, MUC15, MUC20, ITGB7, C1QA, TNFRSF14, HLA-DRB5, TNFSF13B, HLA-DQA1, VSIG4, CD1D, CD74, HAVCR2, CFH, ITGB2, SPN, CD209, LGALS9, SERPING1, NCKAP1L, CD300LF, PTPN22, ARRB2, CD24, A2M, C2, GRN, CLEC4E, CEACAM1, ADCY7, LILRB2, COL3A1, STX7, TAB3, C8A, MUC3A, MASP1, RAC2, BLNK, JAK2, TLR3, PRKCD, PTPRC, TEC, RNASE…	Improvers	Unique
GO_LEUKOCYTE_MEDIATED_IMMUNITY	0.00290477	0.0275419	0.431708	0.30805	1.31515	432	LYZ, CTSD, PIGR, ASAH1, CHI3L1, NPC2, HLA-DRB1, C6, GM2A, TCN1, CTSA, C1QB, FGL2, OLFM4, C1QA, SYNGR1, PLD1, HEXB, CD1D, CD74, HAVCR2, RAB37, ITGB2, METTL7A, LGALS9, SERPING1, NCKAP1L, GGH, DPP7, COMMD9, ARRB2, ADA2, C2, GRN, CEACAM1, LILRB2, STX7, LAMTOR3, CREG1, C8A, ARSA, RAC2, TLR3, PRKCD, ATP6AP2, CEACAM6, GNS, PTPRC, RNASET2, CSTB, HSPA6, P2RX7, DENND1B, C4B, NEU1, ALAD, C1S, YPEL5, C4BPA, …	Improvers	Shared
GO_REGULATION_OF_MICROTUBULE_BASED_MOVEMENT	0.00298182	0.0281	0.431708	0.713829	1.77101	16	HAP1, CCSAP, DEFB1, RHOT1, BBS2, TRIM46, TTC21B, MKKS	Improvers	Unique
GO_MONOVALENT_INORGANIC_CATION_TRANSPORT	0.00316142	0.0290832	0.431708	0.33671	1.37871	275	SLC17A4, ADRA2A, ATP6V0D2, SLC38A3, HPN, SLC15A1, ATP5MG, KCNJ16, SLC4A4, DPP10, EDN3, TMEM38A, WNK4, KCNG3, KCNAB1, COMMD9, KLHL24, ATP6V0E2, SCNN1D, SLC6A20, CAMK2D, SLC5A3, ABCC8, KCNJ3, P2RX7, PTEN, SLC24A1, C15orf48, P2RX4, KCNH3, SLC6A19, ATP6V1H, AMIGO1, ATP6AP1L, SLC23A2, SLC38A11, FXYD6, KCNQ4, DPP6, KCNQ1, KCND2, SLC6A16, SLC22A5, KCNJ13, SHROOM2, SLC38A6, SCN9A, TSC1, ATP6V0A1, KCNAB2,…	Improvers	Shared
GO_RETINA_HOMEOSTASIS	0.00324623	0.0297748	0.431708	0.558089	1.67541	35	LYZ, PIGR, PROM1, TF, SLC2A1, ALB, POC1B, BBS2, TUB, LCA5, SPATA7, RDH12, ERCC6, NPHP3, LTF, CRB1, MKKS, BBS10, SOD1	Improvers	Unique
GO_REGULATION_OF_NEUROTRANSMITTER_LEVELS	0.00373986	0.0326615	0.431708	0.398526	1.47924	123	PPFIA4, PAH, SYT8, ACHE, TSPOAP1, SLC18A2, STX19, LRRK2, SLC44A4, ADCY1, RHOT1, P2RX7, FBXL20, ABAT, APBA1, P2RY1, FMR1, GCHFR, GPER1, RAB3A, STX3, VPS18, SLC6A4, SYT7, SLC38A1, PSEN1, ADORA2B, PDZD11, PRKCB, ALDH9A1, NRXN2, ASIC1, PPT1, LIN7C	Improvers	Shared
GO_ORGANIC_CATION_TRANSPORT	0.00392009	0.0336885	0.407018	0.623862	1.72462	25	SLC22A18, SLC25A29, PDZK1, SLC18A2, CRH, SLC6A20, SLC44A4, SYK, SLC22A5, SLC44A1, SLC6A4, PSEN1, SLC25A42, SLC44A2, MAOB	Improvers	Unique
GO_GLUTAMATE_RECEPTOR_SIGNALING_PATHWAY	0.00400862	0.033762	0.407018	0.500905	1.64766	52	PPARGC1A, SHISA6, KLHL24, FRRS1L, RASGRF1, CRH, GNAQ, CPEB4, SSTR1, CACNG4, FMR1	Improvers	Shared
GO_INSULIN_LIKE_GROWTH_FACTOR_RECEPTOR_SIGNALING_PATHWAY	0.00421026	0.035078	0.407018	0.645059	1.68653	20	AR, IGF1, IGFBP2, PIK3R1, IGFBP1, IGF2R, IGFBP5	Improvers	Unique
GO_STEROID_BIOSYNTHETIC_PROCESS	0.00446343	0.0365954	0.407018	0.404738	1.47528	112	BAAT, CES1, PPARGC1A, ASAH1, HSD17B2, FAXDC2, IGFBP7, NR1H4, HSD17B14, FGF19, TSPOAP1, OSBPL6, HSD17B12, CRH, SCARB1, TM7SF2, CLCN2, PROX1, ACOX2, SC5D, OSBPL9, SRD5A3, GGPS1, FDXR, SCP2, OSBPL3, PRLR, HSD11B2, H6PD, NFYB	Improvers	Unique
GO_POSITIVE_REGULATION_OF_INSULIN_SECRETION_INVOLVED_IN_CELLULAR_RESPONSE_TO_GLUCOSE_STIMULUS	0.00454756	0.0369908	0.407018	0.604206	1.65615	24	HLA-DRB1, NR1H4, GCG, CRH, PDX1, PPP3CB, PLA2G6, CLTRN	Improvers	Unique
GO_LEUKOCYTE_PROLIFERATION	0.00458429	0.0370652	0.407018	0.366993	1.40965	160	HLA-DPA1, HLA-DRB1, HLA-DMB, GPNMB, HLA-DPB1, TNFRSF14, IGF1, TNFSF13B, VSIG4, IGFBP2, CD1D, CD74, HAVCR2, AIF1, SPN, CD209, LGALS9, NCKAP1L, PTPN22, CD24, LILRB2, RAC2, PRKCD, PTPRC, NCK1, P2RX7, DOCK8, VAV3, SLC39A10, LEF1, CD81, PPP3CB, SYK, VSIR, CD46, PRKAR1A, BTN2A2, PURA, CORO1A, HHEX, ARG2, HLA-G, SOS1	Improvers	Unique
GO_REGULATION_OF_LEUKOCYTE_PROLIFERATION	0.00467471	0.0374398	0.407018	0.400336	1.48788	122	HLA-DPA1, HLA-DRB1, HLA-DMB, GPNMB, HLA-DPB1, TNFRSF14, IGF1, TNFSF13B, VSIG4, IGFBP2, CD1D, CD74, HAVCR2, AIF1, SPN, CD209, LGALS9, NCKAP1L, PTPN22, CD24, LILRB2, RAC2, PTPRC, NCK1, VAV3, SLC39A10, CD81, SYK, VSIR, CD46, PRKAR1A, BTN2A2, CORO1A, HHEX, ARG2, HLA-G, SOS1, FGF10	Improvers	Unique
GO_POSITIVE_REGULATION_OF_PEPTIDE_HORMONE_SECRETION	0.00480359	0.0378773	0.407018	0.452777	1.56083	70	HLA-DRB1, NR1H4, PFKFB2, GCG, UCN3, CRH, PDX1, JAK2, TCF7L2, TM7SF3, FFAR1, ABAT, ILDR1, NKX6-1, PPP3CB, PLA2G6, APLN, CLTRN, GPER1	Improvers	Unique
GO_TISSUE_HOMEOSTASIS	0.00499796	0.0389136	0.407018	0.37837	1.41838	133	LYZ, PIGR, PROM1, CTSK, ACP5, LAMA2, CALCA, TF, SLC2A1, ALB, CLDN3, TJP3, LDB2, POC1B, RAC2, CA2, P2RX7, OCLN, TPP1, GCNT2, P2RX4, BBS2, IAPP, SYK, CXADR, GNAS, VEGFA, TUB, NANOS1, SLC22A5, TP53INP2, LCA5, CORO1A, SPATA7, SOX9, RDH12, ZNF675	Improvers	Unique
GO_ALPHA_AMINO_ACID_METABOLIC_PROCESS	0.00510956	0.0395053	0.407018	0.404557	1.49381	117	BAAT, PAH, NR1H4, DGLUCY, SDS, HGD, MCCC1, HOGA1, HIBADH, SEPHS2, ASS1, GPT, HMGCL, AADAT, GGT1, GCLC, RIDA, ALDH4A1, SLC7A7, AZIN2, MAT1A, MECP2, DDO, BCAT2, TST, CDO1, SEPSECS, GOT1, NAGS, ARG2, OAT, CTH, DDAH2, AASS, CARNMT1	Improvers	Unique
GO_ANION_TRANSPORT	0.0051172	0.0395053	0.407018	0.314895	1.31656	334	CES1, SLC17A4, NPC2, PPFIA4, SLC38A3, NR1H4, LCN12, SLC3A1, SLC25A29, PCYOX1, G6PC, SLC4A4, WNK4, TSPOAP1, FOLR1, SLC16A3, SLC2A1, PDZK1, SLC26A11, CEACAM1, SLC6A20, AGT, PRKCD, SLC44A4, CA2, SCARB1, P2RX7, SLC35A1, SLC16A9, SLC25A40, SLC24A1, AVPR1B, GLRA1, CLCN2, ATP11B, ANO8, P2RX4, ATP8B4, ABAT, SLC25A36, SLC16A7, SLC26A9, CLIC6, APBA1, CLCNKB, CLCN7, CLCNKA, SLC6A19, PLA2G2A, SYK, SLC23A2, A…	Improvers	Shared
GO_REGULATION_OF_HORMONE_LEVELS	0.00538891	0.0413328	0.407018	0.323823	1.33272	287	CES1, PPARGC1A, UGT1A1, CTSK, ADRA2A, HSD17B2, HLA-DRB1, SULT1A1, HPN, NR1H4, HSD17B14, PFKFB2, GCNT4, EDN3, TSPOAP1, GCG, UCN3, ADCY5, CACNA2D2, SLC2A1, DUOX2, HSD17B12, CRH, PDX1, PCSK4, AGT, JAK2, ATP6AP2, SCARB1, ABCC8, ADH1C, CYP2C8, TCF7L2, DUOXA2, TM7SF3, CLCN2, FFAR1, ABAT, STXBP4, ILDR1, P2RY1, ADH6, NKX6-1, PPP3CB, MAFA, RAB11FIP2, GNAS, PLA2G6, CAMK2G, CTSB, APLN, CLTRN, SRD5A3, GPER1,…	Improvers	Shared
GO_CELLULAR_RESPONSE_TO_ALKALOID	0.00543135	0.0414526	0.407018	0.659522	1.68251	18	PPARGC1A, GSTM2, AIF1, TMEM38A, CRH, CASP6, DDC	Improvers	Unique
GO_NEUROTRANSMITTER_SECRETION	0.00566024	0.042777	0.407018	0.406037	1.46756	99	PPFIA4, SYT8, TSPOAP1, SLC18A2, STX19, LRRK2, ADCY1, RHOT1, P2RX7, FBXL20, APBA1, P2RY1, FMR1, GPER1, RAB3A, STX3, VPS18, SYT7, PSEN1, ADORA2B, PDZD11, PRKCB, NRXN2, ASIC1, PPT1, LIN7C	Improvers	Shared
GO_DEFENSE_RESPONSE_TO_GRAM_POSITIVE_BACTERIUM	0.00589708	0.0440287	0.407018	0.567592	1.69489	34	LYZ, ACP5, MPEG1, DMBT1, TNFRSF14, RNASE6, HAVCR2, DEFB1, P2RX7, RARRES2, PLA2G2A, ANG	Improvers	Unique
GO_POSITIVE_REGULATION_OF_LEUKOCYTE_PROLIFERATION	0.00614827	0.0453564	0.407018	0.440442	1.54093	76	HLA-DPA1, HLA-DMB, HLA-DPB1, IGF1, TNFSF13B, IGFBP2, CD1D, CD74, HAVCR2, AIF1, CD209, LGALS9, NCKAP1L, PTPN22, CD24, LILRB2, PTPRC, NCK1, VAV3, SLC39A10, CD81, SYK	Improvers	Unique
GO_ACTIVATION_OF_IMMUNE_RESPONSE	0.0064362	0.0473674	0.407018	0.342027	1.37039	233	HLA-DPA1, CLEC10A, HLA-DRA, HLA-DRB1, C6, C1QB, HLA-DPB1, MUC15, MUC20, C1QA, HLA-DRB5, HLA-DQA1, VSIG4, CFH, CD209, SERPING1, NCKAP1L, PTPN22, A2M, C2, CLEC4E, CEACAM1, TAB3, C8A, MUC3A, MASP1, BLNK, PRKCD, PTPRC, TEC, PIK3R1, NCK1, DENND1B, C4B, C1S, VAV3, C4BPA, FPR3, SLC39A10, CFB, THY1, WAS, ELMO2, CD81, C5, PAK1, SYK, CMKLR1, PLA2G6, PRKCH, C3, CD46, BTN2A2, PTPRJ	Improvers	Unique
GO_ION_TRANSMEMBRANE_TRANSPORT	4.69277e-10	2.92551e-08	0.801216	0.339402	1.81403	444	ARL6IP1, ATP6AP1, SESTD1, HAP1, PCYOX1, ANO5, IRS2, SLC26A4, CACNG4, SLC17A5, TMEM63B, CLIC5, CLIC6, SLC12A5, AMIGO1, SLC8A1, PKD2, SLC25A20, TMEM38A, NIPA1, NNT, STIM1, ATP6V1A, CPT1A, SLC46A1, MCOLN3, SLC37A1, CLCN4, HPCA, WNK1, CNIH3, SLC25A27, CLCN3, ZDHHC13, AHCYL1, P2RX4, ATP13A4, SLC5A1, SLC12A6, KCNAB2, BPIFA1, CPT2, SLC26A11, ATP2B2, CLCNKB, SLC44A4, TMC4, ATP10D, APP, AGT, ATP5MG, SLC7A…	Not Improvers	Unique
GO_CATION_TRANSPORT	7.80788e-10	4.75933e-08	0.801216	0.329683	1.76883	455	CP, ATP6AP1, SESTD1, HAP1, SLC5A9, STEAP2, CACNG4, SLC17A5, TMEM63B, TCN1, SYT11, SLC12A5, AMIGO1, SLC8A1, PKD2, SLC25A20, TMEM38A, NIPA1, SLC18A2, NNT, STIM1, ATP6V1A, SLC46A1, MCOLN3, WFS1, CLCN4, SYT13, SLC5A3, HPCA, WNK1, CNIH3, SLC25A27, STEAP4, CLCN3, ZDHHC13, AHCYL1, P2RX4, ATP13A4, SLC5A1, SLC12A6, KCNAB2, BPIFA1, SLC48A1, FFAR1, ATP2B2, SLC44A4, ATP10D, APP, AGT, ATP5MG, SLC7A8, PLCG2, A…	Not Improvers	Unique
GO_INORGANIC_ION_TRANSMEMBRANE_TRANSPORT	1.26474e-08	5.98137e-07	0.74774	0.346816	1.79098	323	ATP6AP1, SESTD1, HAP1, PCYOX1, ANO5, SLC26A4, CACNG4, SLC17A5, CLIC5, CLIC6, SLC12A5, AMIGO1, SLC8A1, PKD2, TMEM38A, NIPA1, NNT, STIM1, ATP6V1A, SLC46A1, MCOLN3, SLC37A1, CLCN4, HPCA, WNK1, SLC25A27, CLCN3, ZDHHC13, P2RX4, SLC5A1, SLC12A6, KCNAB2, BPIFA1, SLC26A11, ATP2B2, CLCNKB, ATP5MG, PLCG2, AKAP9, CNNM2, ATP6V0A1, SLC30A4, SLC6A20, CX3CL1, ATP6V1H, SLC37A2, GNB5, CAMK2D, SLC40A1, RGS9, SLC15…	Not Improvers	Unique
GO_MONOVALENT_INORGANIC_CATION_TRANSPORT	1.62773e-08	7.31945e-07	0.733762	0.391135	1.92385	207	ATP6AP1, SLC5A9, SLC17A5, SLC12A5, AMIGO1, SLC8A1, PKD2, TMEM38A, NNT, ATP6V1A, SLC46A1, CLCN4, SLC5A3, WNK1, SLC25A27, CLCN3, AHCYL1, P2RX4, SLC5A1, SLC12A6, KCNAB2, BPIFA1, ATP5MG, AKAP9, ATP6V0A1, SLC6A20, ATP6V1H, CAMK2D, SLC15A1, SCNN1D, ATP2C1, HCN3, SLC17A4, KLHL24, ANK2, CLCN5, ATP6V0E2, SLC38A6, SPTBN4, GPD1L, SLC22A5, TPCN1, SLC33A1, ATP1B1, KCNA5, ATP6V1D, MT-ND5, KCNQ1, KLHL3, HPN, ST…	Not Improvers	Shared
GO_METAL_ION_TRANSPORT	4.83957e-08	2.0423e-06	0.719513	0.332684	1.72158	338	CP, ATP6AP1, SESTD1, HAP1, SLC5A9, STEAP2, CACNG4, TCN1, SLC12A5, AMIGO1, SLC8A1, PKD2, TMEM38A, NIPA1, STIM1, ATP6V1A, SLC46A1, MCOLN3, WFS1, SLC5A3, HPCA, WNK1, STEAP4, ZDHHC13, AHCYL1, P2RX4, SLC5A1, SLC12A6, KCNAB2, BPIFA1, SLC48A1, FFAR1, ATP2B2, AGT, PLCG2, AKAP9, CNNM2, ATP6V0A1, SLC30A4, SLC6A20, CX3CL1, ATP6V1H, GNB5, CAMK2D, SLC40A1, RGS9, SCNN1D, ATP2C1, GSTM2, TCN2, HCN3, SLC17A4, KLH…	Not Improvers	Unique
GO_CATION_TRANSMEMBRANE_TRANSPORT	5.84011e-08	2.42719e-06	0.719513	0.333968	1.72286	342	ATP6AP1, SESTD1, HAP1, CACNG4, SLC17A5, TMEM63B, SLC12A5, AMIGO1, SLC8A1, PKD2, SLC25A20, TMEM38A, NIPA1, NNT, STIM1, ATP6V1A, SLC46A1, MCOLN3, CLCN4, HPCA, WNK1, CNIH3, SLC25A27, CLCN3, ZDHHC13, P2RX4, SLC5A1, SLC12A6, KCNAB2, BPIFA1, ATP2B2, SLC44A4, APP, AGT, ATP5MG, SLC7A8, PLCG2, AKAP9, ATP8A1, CNNM2, ATP6V0A1, SLC30A4, SLC6A20, CX3CL1, ATP6V1H, GNB5, CAMK2D, SLC40A1, RGS9, PIEZO2, SLC15A1, …	Not Improvers	Unique
GO_LIPID_CATABOLIC_PROCESS	2.18841e-07	8.45468e-06	0.690132	0.418387	1.96146	141	PLA2G2A, CYP24A1, HEXA, PHYH, IRS2, ETFDH, ANGPTL3, ASAH1, ACAD10, CES1, GDPD1, CPT1A, HEXB, PLCE1, ABHD12, HADHB, AKR1B10, SMPD1, LPIN2, GM2A, CYP4F3, CPT2, NAAA, HSD17B14, GALC, PLCG2, RARRES2, PSAP, PLCB4, PLA1A, BDH2, CYP27A1, PAFAH2, HSD17B4, PNPLA7, GBA, PLA2G7, SRD5A3, NAGA, CYP39A1, CPT1C, ACER3, STS, NAPEPLD, SRD5A1, ABCD4, LPIN3, PLA2G4C, FUCA1, SCP2, ACAA2, ECHS1, LIPH, LIPC, ACADM, PL…	Not Improvers	Shared
GO_CELLULAR_LIPID_METABOLIC_PROCESS	1.10935e-06	3.72945e-05	0.643552	0.298704	1.60073	456	ITGB8, PLA2G2A, PDP1, UGT1A1, GLB1, HACD3, CYP3A5, CYP24A1, HEXA, PHYH, IRS2, RBP4, ETFDH, ANGPTL3, PPM1L, ASAH1, CEPT1, PON2, CEACAM1, ACAD10, MBOAT2, FA2H, CES1, GDPD1, ZADH2, CBR4, CPT1A, SERINC2, HEXB, PLCE1, PIK3C2B, ELOVL7, ABHD12, SOCS6, HADHB, AKR1B10, ABCG1, SMPD1, LPIN2, GM2A, CYP4F3, ATG14, CHPT1, CYP4V2, CPT2, EFR3A, NAAA, CTSA, SLC44A4, PI4KA, CYP2U1, AGT, PDPR, GALC, PLCG2, DHRS13, …	Not Improvers	Unique
GO_LOCOMOTORY_BEHAVIOR	1.11489e-06	3.72945e-05	0.643552	0.497522	2.13966	80	DPP4, GAA, CHL1, SLC18A2, VPS13A, MCOLN3, HEXB, ADAM22, ABHD12, NEGR1, APP, ASTN1, PSAP, PAK5, SLITRK6, NCOA2, SPG11, NLGN2, APH1B, ARRB2, SPTBN4, GPR37, GLRB, EPS8, CSTB, FIG4, NPY1R, DLG4, CHRNB2, KCND2, ID2, ABAT, MYO15A, SLC4A10, IDO1, INPP5F, PTEN	Not Improvers	Shared
GO_BEHAVIOR	1.25113e-06	4.08486e-05	0.643552	0.341477	1.70932	251	ABCA7, TLR2, DPP4, P2RY1, GAA, TMOD2, CHL1, SYT11, GDF15, SLC12A5, BCHE, ADCY1, SLC18A2, BBS2, CPT1A, VPS13A, MCOLN3, HEXB, MRAP2, WFS1, ADAM22, MDK, ABHD12, GM2A, NEGR1, P2RX4, CNTNAP2, FBXL20, APP, CRTC1, ASTN1, AGT, CREBRF, ATP8A1, PSAP, PAK5, SLITRK6, NCOA2, PRKAR2B, DACH1, SPG11, NLGN2, APH1B, TRMT1L, CALCA, PSEN1, LEPR, BCL2, ARRB2, SPTBN4, GPR37, GLRB, EPS8, CSTB, MYH14, FIG4, NPY1R, CPEB3…	Not Improvers	Unique
GO_REGULATION_OF_ION_TRANSPORT	1.54826e-06	4.88148e-05	0.643552	0.336262	1.69817	268	ABCA7, ARL6IP1, P2RY1, SESTD1, HAP1, IRS2, CACNG4, CLIC5, SYT11, CLIC6, AMIGO1, CES1, SLC8A1, PKD2, TMEM38A, STIM1, WFS1, SYT13, HPCA, WNK1, CNIH3, AHCYL1, P2RX4, KCNAB2, BPIFA1, FFAR1, CLCNKB, APP, AGT, PLCG2, AKAP9, ATP8A1, CX3CL1, GNB5, CAMK2D, RGS9, NLGN2, GSTM2, HCN3, KLHL24, ANK2, PSEN1, BCL2, ARRB2, SPTBN4, GPD1L, CAMK2G, CACNA1A, TPCN1, PPARGC1A, MAP2K6, RAB3A, ATP1B1, KCNA5, KCNQ1, SARAF…	Not Improvers	Unique
GO_NERVOUS_SYSTEM_PROCESS	2.70754e-06	8.07258e-05	0.627257	0.311142	1.60914	346	ABCA7, TLR2, P2RY1, GSDME, GAA, TPP1, DRAM2, TMOD2, SLC26A4, RBP4, CACNG4, CHL1, CLIC5, SYT11, ADGRV1, SLC12A5, BCHE, PIGR, ADCY1, MYO7B, BBS2, GPR179, TMPRSS3, HEXB, WFS1, MBP, MDK, TFAP2A, UNC119, GM2A, P2RX4, KCNAB2, PPP1R9A, CYP4V2, CNTNAP2, ATP2B2, APP, CRTC1, AGT, GJB2, AKAP9, ATP8A1, OR2I1P, PSAP, RGS9, PIEZO2, PAK5, SLITRK6, SCNN1D, PRKAR2B, NLGN2, GPR143, HLA-DRA, TMEM25, EYS, LRAT, CALC…	Not Improvers	Unique
GO_NEUROTRANSMITTER_SECRETION	3.3146e-06	9.67229e-05	0.627257	0.491392	2.10929	78	P2RY1, SYT11, PTPRN2, ADCY1, SLC18A2, PPP1R9A, NAAA, FBXL20, SNCAIP, PFN2, RPH3A, PSEN1, STXBP3, RAB3A, PNKD, PREPL, BACE1, STXBP1, STX19, NAPB, NF1, LIN7A, GRIK5, CASK, CHRNB2, SYT17, ADORA2B, FMR1, UNC13A	Not Improvers	Shared
GO_SIGNAL_RELEASE	3.66634e-06	0.00010262	0.627257	0.328905	1.65583	257	TLR2, DPP4, P2RY1, IRS2, NOS2, RBP4, SYT11, PTPRN2, ABCA1, ADCY1, SLC18A2, SAA1, CPT1A, STXBP4, UCN3, ARG2, SYT13, RAB8B, P2RX4, PPP1R9A, FFAR1, CHGA, NAAA, FBXL20, SLC44A4, AGT, FCGR2B, HLA-DRB1, CX3CL1, SNCAIP, PFN2, IL1A, NLGN2, RPH3A, PSEN1, RFX3, GPR119, CAMK2G, CACNA1A, STXBP3, MAP2K6, RAB3A, PNKD, KCNA5, FGB, NISCH, PREPL, TLR1, BTN3A1, JAK2, CFTR, BACE1, GCG, STXBP1, MAFA, STX19, NAPB, NF…	Not Improvers	Unique
GO_SODIUM_ION_TRANSPORT	4.0974e-06	0.000112392	0.610527	0.480561	2.06556	81	SLC5A9, SLC8A1, PKD2, SLC5A3, WNK1, AHCYL1, P2RX4, SLC5A1, BPIFA1, SLC6A20, CAMK2D, SCNN1D, HCN3, SLC17A4, KLHL24, SLC38A6, SPTBN4, GPD1L, SLC22A5, TPCN1, ATP1B1, KLHL3, STOM, CNKSR3, SCN3B, CNTN1, SCN2A, NALCN, MAGED2, SLC6A4, CACNA1H, SLC38A3, SLC4A10, SLC12A2, ASIC1, SLC8A2, SIK1	Not Improvers	Unique
GO_LYTIC_VACUOLE_ORGANIZATION	9.95187e-06	0.000248288	0.593325	0.621524	2.25286	35	TMEM106B, GAA, TPP1, ATP6AP2, ABCA1, SCARB2, HEXB, GRN, CLN5, SPG11, GBA, HPS1, NAGPA, HOOK3, AKTIP	Not Improvers	Unique
GO_CHEMICAL_HOMEOSTASIS	1.2213e-05	0.000296463	0.593325	0.272242	1.46036	476	CP, HACD3, P2RY1, ATP6AP1, HAP1, ATP6AP2, IRS2, STEAP2, SLC26A4, RBP4, ANGPTL3, SLC12A5, AKAP11, PTPRN2, FA2H, CES1, SLC8A1, PKD2, TMEM38A, ABCA1, ADCY1, NNT, STIM1, ATP6V1A, SAA1, SLC46A1, GRAMD1B, PRCP, MCOLN3, NEO1, STXBP4, TMPRSS3, HEXB, WFS1, PLCE1, WNK1, SLC25A27, STEAP4, ABCG2, CLCN3, CCL28, ABCG1, P2RX4, ATP13A4, SLC12A6, BPIFA1, FFAR1, ATP2B2, APP, AGT, GRN, SLC7A8, PLCG2, RORA, CNNM2, A…	Not Improvers	Unique
GO_NEUROTRANSMITTER_TRANSPORT	1.57762e-05	0.000363648	0.57561	0.437127	1.92126	92	P2RY1, SYT11, PTPRN2, ADCY1, SLC18A2, PPP1R9A, NAAA, FBXL20, SNCAIP, PFN2, RPH3A, PSEN1, STXBP3, RAB3A, SV2B, PNKD, PREPL, BACE1, STXBP1, STX19, NAPB, SLC29A4, NF1, LIN7A, GRIK5, CASK, CHRNB2, SYT17, ARL6IP5, SLC6A4, ADORA2B, FMR1, UNC13A	Not Improvers	Unique
GO_RAC_PROTEIN_SIGNAL_TRANSDUCTION	2.75155e-05	0.000574535	0.57561	0.698916	2.25198	20	HACD3, ARHGAP44, RHOU, ABI2, CADM4, EPS8, NISCH, RAC2, NF1	Not Improvers	Unique
GO_ANION_TRANSPORT	2.76481e-05	0.000574535	0.57561	0.318289	1.59283	252	PLA2G2A, ABCA7, ARL6IP1, PCYOX1, ANO5, IRS2, SLC26A4, NOS2, SLC17A5, CLIC5, CLIC6, CEACAM1, SLC12A5, CES1, SLC25A20, ABCA1, ATP10B, CPT1A, SLC46A1, SCARB2, LCN12, SLC37A1, CLCN4, ABCG2, CLCN3, ABCG1, AHCYL1, P2RX4, SLC12A6, CPT2, ABCC5, SLC26A11, CLCNKB, SLC44A4, ATP10D, AGT, SLC7A8, ATP8A1, SLC6A20, PSAP, SLC37A2, CYB5RL, ATP8B4, SLC16A3, NPC2, NCOA2, NFE2L1, SLC17A4, CLCN5, PSEN1, SLC38A6, MAP2…	Not Improvers	Shared
GO_CELLULAR_MONOVALENT_INORGANIC_CATION_HOMEOSTASIS	2.8227e-05	0.000582155	0.57561	0.532175	2.04538	49	ATP6AP1, ATP6AP2, SLC8A1, ATP6V1A, TMPRSS3, CLCN3, AGT, GRN, ATP6V0A1, ATP6V1H, CLN5, DMXL2, ATP6V0E2, BCL2, ATP1B1, ATP6V1D, KCTD7, CFTR, ATP6V0D2, ROGDI, RAB38, SLC4A10, SLC12A2, ATP6V1C1, ATP6V1E1, ATP6AP1L, RAB39A	Not Improvers	Unique
GO_REGULATION_OF_NEUROTRANSMITTER_LEVELS	3.22099e-05	0.000649646	0.557332	0.432449	1.91357	95	P2RY1, SYT11, PTPRN2, ADCY1, SLC18A2, PPP1R9A, NAAA, FBXL20, SLC44A4, SNCAIP, PFN2, RPH3A, PSEN1, STXBP3, RAB3A, PNKD, PREPL, BACE1, STXBP1, STX19, NAPB, SLC29A4, NF1, LIN7A, GRIK5, CASK, CHRNB2, SYT17, ARL6IP5, SLC6A4, ADORA2B, ABAT, FMR1, UNC13A, PAH, ASIC1, ACHE, SNCA, UNC13B, SV2A, SNAP25	Not Improvers	Shared
GO_SENSORY_PERCEPTION	3.62464e-05	0.000720463	0.557332	0.349847	1.67843	176	P2RY1, GSDME, DRAM2, SLC26A4, RBP4, CLIC5, ADGRV1, PIGR, MYO7B, BBS2, GPR179, TMPRSS3, HEXB, WFS1, MBP, TFAP2A, UNC119, P2RX4, CYP4V2, ATP2B2, GJB2, OR2I1P, PSAP, RGS9, PIEZO2, SLITRK6, SCNN1D, NLGN2, GPR143, EYS, LRAT, CALCA, ARRB2, SPTBN4, LAMB2, GLRB, RAB3A, MYH14, USH2A, NPY1R, TTC8, PJVK, KCNQ1, HPS1, HPN, BACE1, SCN3B, TRPM8, GRIN2A, PTAFR, BEST1, CABP4, CHRNB2, GNAS, RTP4, PLCB2, GNAL, KCN…	Not Improvers	Unique
GO_REGULATION_OF_ION_TRANSMEMBRANE_TRANSPORT	3.83227e-05	0.000756254	0.557332	0.339521	1.6445	187	ARL6IP1, SESTD1, HAP1, IRS2, CACNG4, CLIC5, CLIC6, AMIGO1, SLC8A1, PKD2, TMEM38A, STIM1, HPCA, WNK1, CNIH3, AHCYL1, KCNAB2, BPIFA1, CLCNKB, APP, AGT, PLCG2, AKAP9, CX3CL1, GNB5, CAMK2D, RGS9, NLGN2, GSTM2, HCN3, KLHL24, ANK2, PSEN1, GPD1L, CACNA1A, TPCN1, PPARGC1A, ATP1B1, KCNA5, KCNQ1, CRBN, CFTR, DLG4, STOM, CTSS, CNKSR3, KCNS1, KCNJ3, SCN3B, CYBA, GRIN2A, SHISA6, PTAFR, KCNH8, SCN2A, NALCN, DA…	Not Improvers	Unique
GO_MONOVALENT_INORGANIC_CATION_HOMEOSTASIS	3.94314e-05	0.000770511	0.557332	0.473452	1.93334	63	ATP6AP1, ATP6AP2, SLC26A4, SLC12A5, SLC8A1, ATP6V1A, TMPRSS3, CLCN3, SLC12A6, AGT, GRN, ATP6V0A1, ATP6V1H, CLN5, DMXL2, ATP6V0E2, BCL2, ATP1B1, KCNA5, ATP6V1D, KCTD7, CFTR, ATP6V0D2, ROGDI, RAB38, SLC4A10, SLC12A2, ATP6V1C1, ATP6V1E1, ATP6AP1L, RAB39A	Not Improvers	Unique
GO_LIPOSACCHARIDE_METABOLIC_PROCESS	4.68468e-05	0.000868248	0.557332	0.477588	1.94056	62	ITGB8, GLB1, HEXA, ASAH1, FA2H, HEXB, SMPD1, GM2A, CTSA, GALC, ARSA, SUMF2, PSAP, PIGZ, B4GALT6, MPPE1, PIGV, GBA, B4GALT5, NAGA, PIGK, STS, FUCA1, PIGN, ST8SIA5, ST8SIA1, KIT, GAL3ST4, LARGE1	Not Improvers	Shared
GO_SYNAPTIC_SIGNALING	4.82183e-05	0.00088767	0.557332	0.309735	1.5804	279	P2RY1, HAP1, TMOD2, CACNG4, SYT11, CNTN4, SLC12A5, PTPRN2, RAB26, BCHE, ADCY1, SLC18A2, MBP, CNIH3, NQO1, UNC119, SYNJ2BP, P2RX4, SLC12A6, PPP1R9A, NRG3, NAAA, FBXL20, APP, CRTC1, AGT, AKAP9, NSG1, CX3CL1, SNCAIP, PLCB4, PFN2, PRKAR2B, SPG11, NLGN2, RNF19A, TMEM25, RPH3A, PSEN1, ARRB2, CLSTN3, CACNA1A, STXBP3, GLRB, RAB3A, SV2B, PNKD, NISCH, GUCY1A1, PREPL, GNAQ, SST, KCTD13, JAK2, BACE1, CPEB3, …	Not Improvers	Unique
GO_GLYCOSPHINGOLIPID_METABOLIC_PROCESS	5.32972e-05	0.000968174	0.557332	0.564536	2.07374	39	ITGB8, GLB1, HEXA, ASAH1, FA2H, HEXB, SMPD1, GM2A, CTSA, GALC, ARSA, SUMF2, PSAP, B4GALT6, GBA, B4GALT5, NAGA, STS, ST8SIA5, ST8SIA1, KIT, LARGE1, A4GALT	Not Improvers	Shared
GO_REGULATION_OF_CELLULAR_PH	5.77949e-05	0.00103615	0.557332	0.571967	2.07262	38	ATP6AP1, ATP6AP2, ATP6V1A, CLCN3, GRN, ATP6V0A1, ATP6V1H, CLN5, DMXL2, ATP6V0E2, BCL2, ATP6V1D, CFTR, ATP6V0D2, ROGDI, RAB38, SLC4A10, ATP6V1C1, ATP6V1E1, ATP6AP1L, RAB39A	Not Improvers	Unique
GO_REGULATION_OF_SECRETION	5.96521e-05	0.0010625	0.557332	0.298529	1.54441	295	TLR2, DPP4, KRT20, P2RY1, ATP6AP1, HAP1, IRS2, NOS2, RBP4, LAMP1, SYT11, CEACAM1, CES1, RAB26, ERP29, ADCY1, SAA1, CPT1A, STXBP4, UCN3, ARG2, SYT13, RAB8B, ABCG1, P2RX4, PPP1R9A, FFAR1, CHGA, FBXL20, AGT, ERBB3, ARFIP1, FCGR2B, HLA-DRB1, CX3CL1, SNCAIP, PFN2, IL1A, NLGN2, CD74, RFX3, CACNA1A, STXBP3, MAP2K6, RAB3A, PNKD, KCNA5, FGB, PREPL, TLR1, KCNQ1, RAC2, JAK2, CFTR, MICAL1, BACE1, GCG, STXBP1…	Not Improvers	Unique
GO_CELLULAR_LIPID_CATABOLIC_PROCESS	6.13923e-05	0.00108645	0.538434	0.416362	1.8591	101	HEXA, PHYH, IRS2, ETFDH, ANGPTL3, ASAH1, ACAD10, GDPD1, CPT1A, HEXB, ABHD12, HADHB, AKR1B10, SMPD1, LPIN2, GM2A, CYP4F3, CPT2, GALC, PLCG2, PSAP, BDH2, HSD17B4, PNPLA7, GBA, PLA2G7, SRD5A3, NAGA, CPT1C, ACER3, NAPEPLD, ABCD4, LPIN3, PLA2G4C, FUCA1, SCP2, ACAA2, ECHS1, LIPH, LIPC	Not Improvers	Shared
GO_PH_REDUCTION	7.4297e-05	0.00127373	0.538434	0.637161	2.18553	26	ATP6AP1, ATP6AP2, ATP6V1A, CLCN3, GRN, ATP6V0A1, ATP6V1H, CLN5, DMXL2, ATP6V0E2, BCL2, ATP6V1D, ATP6V0D2, ROGDI, RAB38, ATP6V1C1, ATP6V1E1, RAB39A	Not Improvers	Unique
GO_MEMBRANE_LIPID_METABOLIC_PROCESS	8.26474e-05	0.00138233	0.538434	0.402689	1.79706	100	ITGB8, GLB1, HACD3, HEXA, PPM1L, ASAH1, FA2H, SERINC2, HEXB, ELOVL7, SMPD1, GM2A, CTSA, GALC, ARSA, SUMF2, CERS6, PSAP, PIGZ, B4GALT6, SPTLC2, MPPE1, PIGV, GBA, B4GALT5, NAGA, PIGK, ACER3, STS, FUT3, FUCA1, HACD4, PIGN, ST8SIA5, ST8SIA1, KIT, GAL3ST4, LARGE1, HACD2, ENPP2, A4GALT, ASAH2, CERS2	Not Improvers	Shared
GO_REGULATION_OF_TRANSMEMBRANE_TRANSPORT	8.68501e-05	0.00143275	0.538434	0.317873	1.58128	226	ARL6IP1, SESTD1, HAP1, IRS2, CACNG4, CLIC5, CLIC6, PIM1, AMIGO1, SLC8A1, PKD2, TMEM38A, STIM1, STXBP4, HPCA, WNK1, CNIH3, SLC25A27, C2CD5, AHCYL1, KCNAB2, BPIFA1, CLCNKB, APP, AGT, PLCG2, AKAP9, CREBL2, CX3CL1, GNB5, CAMK2D, RGS9, NLGN2, GSTM2, HCN3, KLHL24, ANK2, PSEN1, BCL2, GPD1L, CACNA1A, TPCN1, PPARGC1A, STXBP3, OCLN, ATP1B1, KCNA5, KCNQ1, CRBN, CFTR, DLG4, STOM, CTSS, CNKSR3, KCNS1, KCNJ3, …	Not Improvers	Unique
GO_REGULATION_OF_EXOCYTOSIS	9.04782e-05	0.00145136	0.538434	0.417185	1.84602	95	P2RY1, ATP6AP1, HAP1, LAMP1, SYT11, CEACAM1, RAB26, ADCY1, SYT13, RAB8B, FBXL20, FCGR2B, PFN2, STXBP3, RAB3A, FGB, PREPL, RAC2, CFTR, MICAL1, BACE1, STXBP1, NAPB, PTAFR, GRIK5, CASK, CHRNB2, SYT17, ADORA2B, CACNA1H, CD84, TRPV6, FMR1	Not Improvers	Shared
GO_VACUOLE_ORGANIZATION	0.000114255	0.0017445	0.538434	0.414287	1.8136	87	TMEM106B, GAA, TPP1, ATP6AP2, ABCA1, MAP1LC3A, SCARB2, HEXB, PIK3C2B, ATG14, GRN, CLN5, SPG11, PSEN1, GABARAPL1, GBA, SMCR8, TP53INP2, FIG4, HPS1, NAGPA, TP53INP1, HOOK3, AKTIP, ENO3, UBXN2B, ATG2B, MAP1LC3B, RAB7B, ULK1, LRSAM1, RAB39A, ATG9B	Not Improvers	Unique
GO_PHAGOSOME_MATURATION	0.000128635	0.00192811	0.518848	0.651471	2.16879	23	SYT11, ATP6V1A, ATP6V0A1, ATP6V1H, SPG11, ATP6V0E2, ATP6V1D, ATP6V0D2, RAB38, RAB7B, ATP6V1C1, ATP6V1E1, RAB39A, UNC13B, ATP6V0D1	Not Improvers	Unique
GO_SENSORY_PERCEPTION_OF_LIGHT_STIMULUS	0.00013668	0.00202051	0.518848	0.470518	1.89922	60	DRAM2, RBP4, CLIC5, ADGRV1, BBS2, GPR179, WFS1, UNC119, CYP4V2, RGS9, SLITRK6, GPR143, EYS, LRAT, LAMB2, GLRB, USH2A, HPS1, BEST1, CABP4, CHRNB2, OAT, SLC4A10, CNGA1	Not Improvers	Unique
GO_SPHINGOLIPID_METABOLIC_PROCESS	0.000137009	0.00202051	0.518848	0.439776	1.87851	77	ITGB8, GLB1, HACD3, HEXA, PPM1L, ASAH1, FA2H, SERINC2, HEXB, ELOVL7, SMPD1, GM2A, CTSA, GALC, ARSA, SUMF2, CERS6, PSAP, B4GALT6, SPTLC2, GBA, B4GALT5, NAGA, ACER3, STS, FUT3, HACD4, ST8SIA5, ST8SIA1, KIT, LARGE1, HACD2, ENPP2, A4GALT, ASAH2, CERS2	Not Improvers	Shared
GO_OLIGOSACCHARIDE_METABOLIC_PROCESS	0.000140455	0.00206026	0.518848	0.631821	2.12767	24	GAA, HEXB, GM2A, MAN2B2, GANC, MGAM, NAGA, IDUA, FUT3, ST8SIA5, ST8SIA1, FUT4, GAL3ST4, ST6GAL2, SLC2A1, CTBS	Not Improvers	Shared
GO_EXOCYTOSIS	0.000157824	0.00229054	0.518848	0.268465	1.432	409	QPCT, TLR2, GUSB, AOC1, GLB1, LAMP2, P2RY1, ATP6AP1, HAP1, PTPRJ, GAA, LYZ, ATP6AP2, SERPINB3, GNS, STEAP2, LAMP1, TCN1, ASAH1, SYT11, CEACAM1, ARHGAP44, IGF2R, PTPRN2, RAB26, PIGR, SCRN1, ADCY1, ANK1, PLAC8, CHI3L1, PRCP, YPEL5, F13A1, HEXB, DPP7, ADA2, SYT13, RAB8B, SLPI, TIMP2, GM2A, MMRN1, KCNAB2, AGA, VPS41, CHGA, FBXL20, CTSA, APP, GRN, FCGR2B, AGL, ATP8A1, RAB3IP, ARSA, ATP6V0A1, RARRES2, …	Not Improvers	Unique
GO_REGULATION_OF_PH	0.000159793	0.0023069	0.518848	0.53663	1.99305	41	ATP6AP1, ATP6AP2, SLC26A4, ATP6V1A, CLCN3, GRN, ATP6V0A1, ATP6V1H, CLN5, DMXL2, ATP6V0E2, BCL2, ATP6V1D, CFTR, ATP6V0D2, ROGDI, RAB38, SLC4A10, ATP6V1C1, ATP6V1E1, ATP6AP1L, RAB39A	Not Improvers	Unique
GO_POSITIVE_REGULATION_OF_ION_TRANSPORT	0.000161178	0.00231472	0.518848	0.382745	1.72336	111	ABCA7, ARL6IP1, P2RY1, HAP1, CACNG4, AMIGO1, PKD2, STIM1, WFS1, WNK1, AHCYL1, P2RX4, FFAR1, AGT, PLCG2, AKAP9, ATP8A1, CX3CL1, RGS9, GSTM2, ANK2, PSEN1, ARRB2, GPD1L, MAP2K6, ATP1B1, KCNQ1, CFTR, GCG, STXBP1, CTSS, CNKSR3, SCN3B, CNTN1, ABCB4, PTAFR, CASK, CHRNB2, TRPV3, CACNA2D1, SLC6A4, KCNJ11, SLC38A3, ABAT, ACSL5	Not Improvers	Unique
GO_DETECTION_OF_BIOTIC_STIMULUS	0.000163436	0.00231803	0.518848	0.715548	2.14473	16	TLR2, PTPRJ, LBP, NAIP, HLA-DRB1, CDHR2, DACH1, SMO, TLR1, CD1D, TLR4	Not Improvers	Shared
GO_ORGANIC_ANION_TRANSPORT	0.000192085	0.00268821	0.518848	0.326639	1.59932	200	PLA2G2A, ABCA7, ARL6IP1, IRS2, SLC26A4, NOS2, SLC17A5, CEACAM1, CES1, SLC25A20, ABCA1, ATP10B, CPT1A, SLC46A1, SCARB2, LCN12, SLC37A1, ABCG2, ABCG1, P2RX4, CPT2, ABCC5, SLC44A4, ATP10D, AGT, SLC7A8, ATP8A1, SLC6A20, PSAP, SLC37A2, CYB5RL, ATP8B4, SLC16A3, NPC2, NCOA2, NFE2L1, SLC17A4, PSEN1, SLC38A6, MAP2K6, RAB3A, SLC33A1, OSBPL2, SLC7A14, CFTR, STXBP1, ABCD4, ABCB4, NF1, SCP2, SLC16A6, ARL6IP5,…	Not Improvers	Unique
GO_MONOCARBOXYLIC_ACID_METABOLIC_PROCESS	0.000231261	0.00318769	0.518848	0.291633	1.4738	270	PDP1, UGT1A1, VNN3, HACD3, CYP3A5, CYP24A1, UGT1A6, PHYH, IRS2, ETFDH, ANGPTL3, PON2, CEACAM1, ACAD10, FA2H, CES1, PROX1, ZADH2, CBR4, CPT1A, ELOVL7, HADHB, LPIN2, ACCS, CYP4F3, CKMT1B, CYP4V2, CPT2, NAAA, CYP2U1, APP, PDPR, SCPEP1, ABHD10, SLC16A3, BDH2, PRKAR2B, GSTM2, CKMT1A, CYP27A1, CD74, NFE2L1, HSD17B4, PSEN1, EPHX2, PC, PPARGC1A, OSBPL3, UGT2B15, OSBPL2, PNKD, CYP7B1, ALOX5AP, CYP2J2, CYP…	Not Improvers	Shared
GO_NEUROMUSCULAR_PROCESS	0.00028458	0.00384534	0.498493	0.523539	1.94443	41	GAA, TPP1, HEXB, GM2A, KCNAB2, APP, PSAP, SLITRK6, NLGN2, GLRB, PNKD, BACE1, DLG4, GRIN2A, MYCBP2, HERC1, PTEN, JPH4, RAC3, FGF12, AGTPBP1, ADARB1, CDH23, CNTNAP1, TNR	Not Improvers	Unique
GO_REGULATION_OF_NEUROTRANSMITTER_TRANSPORT	0.000325526	0.00429287	0.498493	0.488018	1.90391	52	P2RY1, SYT11, ADCY1, PPP1R9A, FBXL20, SNCAIP, PFN2, RAB3A, PNKD, PREPL, BACE1, STXBP1, NAPB, NF1, GRIK5, CASK, CHRNB2, ARL6IP5, ADORA2B, FMR1, UNC13A, ASIC1, SNCA, UNC13B	Not Improvers	Unique
GO_REGULATION_OF_TRANSPORTER_ACTIVITY	0.000335943	0.00440905	0.498493	0.386754	1.73547	103	HAP1, CACNG4, PIM1, AMIGO1, PKD2, STIM1, HPCA, WNK1, CNIH3, AHCYL1, APP, PLCG2, AKAP9, GNB5, CAMK2D, RGS9, NLGN2, GSTM2, KLHL24, ANK2, BCL2, GPD1L, PPARGC1A, ATP1B1, KCTD7, CFTR, DLG4, STOM, CTSS, CNKSR3, KCNS1, SCN3B, GRIN2A, SHISA6, PTAFR, DAPK1, JSRP1, CACNA2D1, KCNJ11, GOPC, FMR1, PDZK1, GJA1, PTEN, KCNAB1, JPH4	Not Improvers	Unique
GO_ANION_TRANSMEMBRANE_TRANSPORT	0.000361268	0.00471885	0.498493	0.369442	1.67394	112	ARL6IP1, PCYOX1, ANO5, IRS2, SLC26A4, CLIC5, CLIC6, SLC12A5, SLC25A20, CPT1A, SLC46A1, SLC37A1, CLCN4, CLCN3, SLC12A6, CPT2, SLC26A11, CLCNKB, SLC44A4, AGT, SLC7A8, SLC6A20, SLC37A2, SLC16A3, CLCN5, PSEN1, SLC38A6, GLRB, SLC7A14, CFTR, ABCD4, PTAFR, BEST1, APOL1, ARL6IP5, SLC7A7, SLC38A3, GOPC, EMB, MPC2, ACSL5, SLC4A10, GJA1	Not Improvers	Unique
GO_REGULATION_OF_SODIUM_ION_TRANSPORT	0.000388981	0.00500927	0.498493	0.573943	2.04149	31	SLC8A1, WNK1, AHCYL1, P2RX4, BPIFA1, CAMK2D, KLHL24, SPTBN4, GPD1L, ATP1B1, STOM, CNKSR3, SCN3B, CNTN1	Not Improvers	Unique
GO_REGULATION_OF_REGULATED_SECRETORY_PATHWAY	0.000421861	0.00535415	0.498493	0.425829	1.79536	71	P2RY1, LAMP1, SYT11, CEACAM1, ADCY1, SYT13, FBXL20, FCGR2B, PFN2, STXBP3, RAB3A, PREPL, RAC2, MICAL1, BACE1, STXBP1, NAPB, PTAFR, GRIK5, CASK, CHRNB2, SYT17, ADORA2B, CACNA1H, CD84, TRPV6, FMR1, ITGAM	Not Improvers	Unique
GO_PROCESS_UTILIZING_AUTOPHAGIC_MECHANISM	0.000442871	0.00549681	0.498493	0.290331	1.46505	266	RRAGD, LAMP2, HAP1, SPATA18, DRAM2, ULK2, TRIM22, SYT11, SCOC, SOGA1, VPS13C, RNF152, ATP6V1A, MAP1LC3A, VPS13A, EPG5, TMEM59, PIK3C2B, FLCN, USP33, ATG14, VPS41, CTSA, ATP6V0A1, PSAP, ATP6V1H, FBXL2, WDFY3, LAMTOR3, LGALS8, SPTLC2, ZFYVE1, NBR1, PSEN1, ATP6V0E2, LEPR, GPR137B, BCL2, GABARAPL1, RAB39B, TPCN1, PPARGC1A, CISD2, GBA, SMCR8, TP53INP2, ATP6V1D, BNIP3L, DDIT3, RRAGB, SESN3, TAB3, KLHL3…	Not Improvers	Unique
GO_REGULATION_OF_CATION_CHANNEL_ACTIVITY	0.000506821	0.00607078	0.477271	0.434713	1.79512	65	HAP1, CACNG4, AMIGO1, PKD2, STIM1, HPCA, CNIH3, APP, PLCG2, GNB5, CAMK2D, RGS9, NLGN2, GSTM2, KLHL24, ANK2, PPARGC1A, DLG4, STOM, CTSS, KCNS1, GRIN2A, SHISA6, DAPK1, JSRP1, CACNA2D1, KCNJ11, FMR1, KCNAB1, JPH4	Not Improvers	Unique
GO_PROTEIN_LOCALIZATION_TO_SYNAPSE	0.000512179	0.00610829	0.477271	0.505339	1.86478	40	CACNG4, ARHGAP44, ADAM22, STX7, SYNJ2BP, NSG1, NLGN2, CLSTN3, DLG4, NPHS1, GRIN2A, SHISA6, MAPT, KIF5C, CEP112, MAPK10, LGI1, IQSEC2, SNAP25, CPLX1, RAP1A, RAB11A	Not Improvers	Unique
GO_FEEDING_BEHAVIOR	0.000521627	0.00619404	0.477271	0.5507	1.96408	33	P2RY1, GDF15, CPT1A, MRAP2, NEGR1, APP, AGT, DACH1, CALCA, LEPR, NPY1R, GCG, IFT80, NAPEPLD, CHRNB2, RMI1, PRLHR	Not Improvers	Unique
GO_FATTY_ACID_METABOLIC_PROCESS	0.000525971	0.0062187	0.477271	0.336292	1.59085	156	PDP1, HACD3, CYP24A1, PHYH, IRS2, ETFDH, ANGPTL3, PON2, CEACAM1, ACAD10, FA2H, CES1, ZADH2, CBR4, CPT1A, ELOVL7, HADHB, LPIN2, CYP4F3, CYP4V2, CPT2, NAAA, CYP2U1, PDPR, BDH2, PRKAR2B, GSTM2, CD74, NFE2L1, HSD17B4, EPHX2, PPARGC1A, ALOX5AP, CYP2J2, EPHX1, CPT1C, ABCD4, LPIN3, PLA2G4C, HACD4, SCP2, ACAA2, ECHS1, LIPH, LIPC, ACADM, PDK3	Not Improvers	Unique
GO_ION_HOMEOSTASIS	0.000600825	0.00698332	0.477271	0.274365	1.41752	321	CP, P2RY1, ATP6AP1, HAP1, ATP6AP2, STEAP2, SLC26A4, ANGPTL3, SLC12A5, SLC8A1, PKD2, TMEM38A, ABCA1, STIM1, ATP6V1A, SAA1, SLC46A1, MCOLN3, NEO1, TMPRSS3, HEXB, WFS1, PLCE1, WNK1, SLC25A27, STEAP4, ABCG2, CLCN3, CCL28, ABCG1, P2RX4, ATP13A4, SLC12A6, FFAR1, ATP2B2, APP, AGT, GRN, SLC7A8, PLCG2, CNNM2, ATP6V0A1, SLC30A4, CX3CL1, ATP6V1H, CAMK2D, SLC40A1, ATP2C1, BDH2, CLN5, GSTM2, DMXL2, FAM20A, CA…	Not Improvers	Unique
GO_SODIUM_ION_TRANSMEMBRANE_TRANSPORT	0.000620909	0.00709648	0.477271	0.467931	1.83241	54	SLC8A1, PKD2, WNK1, SLC5A1, BPIFA1, SLC6A20, CAMK2D, SCNN1D, HCN3, SLC17A4, KLHL24, GPD1L, TPCN1, ATP1B1, STOM, CNKSR3, SCN3B, SCN2A, NALCN, SLC6A4, CACNA1H, SLC4A10, SLC12A2, ASIC1, SLC8A2	Not Improvers	Unique
GO_CELL_MORPHOGENESIS_INVOLVED_IN_NEURON_DIFFERENTIATION	0.000639991	0.00728422	0.477271	0.285717	1.44728	274	LZTS3, TCTN1, TMEM106B, ULK2, IRS2, CHL1, CNTN4, AMIGO1, MEGF8, ARHGAP44, NCAM1, NTN1, ADCY1, DPYSL2, WASL, NEO1, TRAK1, PLXNC1, GAB1, USP33, PPP1R9A, KIF13B, APP, SHH, KIF3A, SEMA5A, ZFYVE27, MAP2, CELSR2, NGFR, RND2, ABI2, SLITRK6, SPG11, B4GALT6, SMO, SLIT1, ZSWIM8, PSEN1, BCL2, SPTBN4, LAMB2, RAB3A, PTPRO, L1CAM, RAP1GAP, B4GALT5, VANGL2, PTCH1, RAC2, TSKU, BTBD3, DLG4, STXBP1, FGFR2, USP9X, …	Not Improvers	Unique
GO_REGULATION_OF_TRANS_SYNAPTIC_SIGNALING	0.000674161	0.00755968	0.477271	0.313988	1.52593	188	P2RY1, HAP1, CACNG4, SYT11, CNTN4, RAB26, BCHE, ADCY1, PPP1R9A, NRG3, FBXL20, APP, CRTC1, AGT, AKAP9, NSG1, CX3CL1, SNCAIP, PLCB4, PFN2, PRKAR2B, NLGN2, RNF19A, TMEM25, PSEN1, ARRB2, CLSTN3, CACNA1A, RAB3A, PNKD, NISCH, GUCY1A1, PREPL, KCTD13, JAK2, BACE1, CPEB3, DLG4, STXBP1, GRIN2A, NAPB, NF1, SHISA6, GRIK5, CASK, CHRNB2, MAPT, SLC6A4, PTPRS, ADORA2B, KIT, ABAT, FMR1, UNC13A, SLC4A10, SCTR, PTE…	Not Improvers	Unique
GO_TRANSITION_METAL_ION_TRANSPORT	0.000705073	0.00786185	0.477271	0.467518	1.79687	49	CP, ATP6AP1, STEAP2, TCN1, ATP6V1A, SLC46A1, STEAP4, SLC48A1, ATP6V0A1, SLC30A4, ATP6V1H, SLC40A1, ATP2C1, TCN2, ATP6V0E2, HEPH, ATP6V1D, SLC30A8, ATP6V0D2	Not Improvers	Unique
GO_ORGANIC_HYDROXY_COMPOUND_TRANSPORT	0.000728979	0.00806985	0.477271	0.371888	1.66981	104	ABCA7, NPC1L1, P2RY1, RBP4, SYT11, CEACAM1, CES1, ABCA1, SLC18A2, GRAMD1B, SYT13, SLC5A3, OSBP2, ABCG1, SLC5A1, CHGA, AQP7, AGT, GRAMD1C, SHH, SLC16A3, NPC2, NCOA2, MSR1, OSBPL3, RAB3A, OSBPL2, NISCH, PTCH1, CFTR, SLC29A4, ABCB4, OSBPL7, SCP2, CHRNB2, SYT17, LIPC, OSBPL6, SLC6A4, ABAT, EMB, KDM5B, KCNA2, SLCO1A2	Not Improvers	Unique
GO_REGULATION_OF_GLUTAMATE_RECEPTOR_SIGNALING_PATHWAY	0.000729611	0.00806985	0.477271	0.580855	1.99239	26	CACNG4, CNIH3, APP, CX3CL1, RGS9, NLGN2, KLHL24, PPARGC1A, FRRS1L, DLG4, GRIN2A, SHISA6, DAPK1, UNC13A, NECAB2	Not Improvers	Unique
GO_LYSOSOMAL_TRANSPORT	0.00081543	0.0087372	0.477271	0.464393	1.78486	49	TMEM106B, LAMP2, CACNG4, LAMP1, IGF2R, SCARB2, TRAK1, EPG5, ATG14, VPS41, GRN, PSAP, SORT1, NAGPA, CLEC16A, SNX27, HOOK3, AKTIP, SNX16, RAB7B, ZFYVE16	Not Improvers	Unique
GO_REGULATION_OF_HORMONE_LEVELS	0.000838338	0.00894771	0.477271	0.301664	1.48325	212	UGT1A1, DPP4, CYP3A5, P2RY1, ATP6AP2, CPQ, IRS2, NOS2, RBP4, PTPRN2, CES1, CPT1A, STXBP4, CHST9, DUOXA2, UCN3, RAB8B, DUOX2, AKR1B10, HSD17B2, FFAR1, CHGA, HSD17B14, AGT, SHH, SLC7A8, DHRS13, HLA-DRB1, SCPEP1, NLGN2, LRAT, HSD17B4, RFX3, GPR119, CAMK2G, CACNA1A, PPARGC1A, STXBP3, SRD5A3, KCNA5, FGB, PCSK4, JAK2, CFTR, HPN, GCG, ERO1B, MAFA, SRD5A1, SLC30A8, ILDR1, PCSK2, TCF7L2, GNAS, TRPV4, CPE,…	Not Improvers	Shared
GO_ANTIGEN_PROCESSING_AND_PRESENTATION_OF_PEPTIDE_OR_POLYSACCHARIDE_ANTIGEN_VIA_MHC_CLASS_II	0.000862159	0.00916629	0.477271	0.464106	1.81062	52	CTSF, HLA-DQB1, FCGR2B, KIF3A, HLA-DRB5, HLA-DRB1, HLA-DPA1, HLA-DRA, SH3GL2, CD74, CTSD, HLA-DOA, HLA-DMA, KIF3C, CTSS, DYNC1H1, SAR1B, AP1S2, DYNC1LI2	Not Improvers	Shared
GO_CELL_ACTIVATION_INVOLVED_IN_IMMUNE_RESPONSE	0.000904444	0.00954129	0.477271	0.270971	1.4024	313	QPCT, TLR2, GUSB, AOC1, GLB1, LAMP2, PTPRJ, GAA, LYZ, ATP6AP2, SERPINB3, GNS, LAMP1, TCN1, ASAH1, CD180, CEACAM1, IGF2R, SPN, PTPRN2, PIGR, PLAC8, CHI3L1, PRCP, YPEL5, HEXB, DPP7, ADA2, MDK, LBP, SLPI, TIMP2, GM2A, KCNAB2, AGA, CHGA, CTSA, APP, GRN, FCGR2B, AGL, PLCG2, ATP8A1, RORA, ARSA, ATP6V0A1, PSAP, ATP8B4, NPC2, LAMTOR3, CDH17, CD74, TNFSF13, CTSD, PSEN1, MGAM, STXBP3, DNASE1, RAB3A, CSTB, …	Not Improvers	Unique
GO_MYELOID_LEUKOCYTE_ACTIVATION	0.000931526	0.0097155	0.477271	0.279755	1.44476	300	PLA2G2A, QPCT, TLR2, GUSB, AOC1, GLB1, LAMP2, UBD, PTPRJ, GAA, LYZ, ATP6AP2, SERPINB3, GNS, LAMP1, TCN1, ASAH1, SYT11, CEACAM1, IGF2R, PTPRN2, PIGR, PLAC8, CHI3L1, PRCP, YPEL5, HEXB, DPP7, ADA2, LBP, SLPI, TIMP2, GM2A, KCNAB2, AGA, CHGA, CTSA, APP, GRN, FCGR2B, AGL, ATP8A1, RORA, ARSA, ATP6V0A1, CX3CL1, PSAP, ATP8B4, NPC2, LAMTOR3, CD74, CTSD, PSEN1, GPR137B, MGAM, STXBP3, DNASE1, RAB3A, CSTB, AT…	Not Improvers	Unique
GO_MICROTUBULE_BASED_TRANSPORT	0.000950312	0.00979965	0.477271	0.396477	1.70415	81	HAP1, LAMP1, TTC21A, TRAK1, BICDL1, APP, DYNC2H1, KIF3A, MAP2, SPG11, RFX3, TTLL1, NME5, IFT172, KIF3C, IFT81, IFT80, STK36, IFT27, IFT140, DYNC1H1, TRIP11, MAPT, KIF5C, SPEF2, BLOC1S5	Not Improvers	Unique
GO_CILIUM_ORGANIZATION	0.00095454	0.00980638	0.477271	0.315766	1.49821	162	TCTN1, HAP1, PKD2, BBS2, TTC21A, TTC39C, POC1B, DYNC2H1, AKAP9, RAB3IP, KIF3A, SPAG16, CELSR2, PRKAR2B, CEP126, OCRL, RFX3, TTBK2, TTLL1, TTLL3, UBXN10, NME5, WDR11, ATP6V1D, TTC8, VANGL2, IFT172, KIF3C, IFT81, ODF2L, IFT80, STK36, CEP97, INTU, ONECUT2, IFT27, IFT140, DYNC1H1, TMEM67, CEP70, TRIP11, RSPH1, NEK1, SPEF2, TOGARAM1, ONECUT1, KCTD17, MARK4, CKAP5, FHDC1, C2CD3, ATAT1	Not Improvers	Unique
GO_NEGATIVE_REGULATION_OF_LEUKOCYTE_CELL_CELL_ADHESION	0.000973197	0.00996074	0.477271	0.468552	1.82594	50	CEACAM1, SPN, TNFRSF14, ARG2, MDK, WNK1, SOCS6, CCL28, SHH, FCGR2B, HLA-DRB1, CD74, GPNMB, RC3H2, PDE5A, RC3H1, TWSG1, PRDX2, ASS1, BTN2A2, IDO1, CD86, DTX1	Not Improvers	Shared
GO_ORGANIC_HYDROXY_COMPOUND_METABOLIC_PROCESS	0.0010415	0.0104264	0.45506	0.284685	1.42171	253	NPC1L1, CYP3A5, P2RY1, CYP24A1, CPQ, RBP4, ANGPTL3, ASAH1, QDPR, CES1, PROX1, GDPD1, ALDH2, ABCA1, CBR4, DUOXA2, PLCE1, SLC5A3, DUOX2, AKR1B10, SULT1C4, ABCG1, SMPD1, CYP4F3, CYP4V2, NAAA, APP, PLCG2, DHRS13, HMGCS2, SNCAIP, INPP5D, PLCB4, NPC2, INPP4A, CYP27A1, LRAT, SPTLC2, NFE2L1, HSD17B4, FAXDC2, OCRL, EPHX2, LEPR, BCL2, GPR37, OSBPL3, GBA, OSBPL2, SRD5A3, PNKD, CYP7B1, DHFR, CYP39A1, CFTR, H…	Not Improvers	Shared
GO_INORGANIC_ANION_TRANSMEMBRANE_TRANSPORT	0.00105407	0.0105139	0.45506	0.506396	1.83502	38	PCYOX1, ANO5, SLC26A4, CLIC5, CLIC6, SLC12A5, SLC37A1, CLCN4, CLCN3, SLC12A6, SLC26A11, CLCNKB, SLC37A2, CLCN5, GLRB, CFTR, PTAFR, BEST1, APOL1	Not Improvers	Unique
GO_BILE_ACID_BIOSYNTHETIC_PROCESS	0.00113227	0.011132	0.45506	0.618652	1.99336	20	CES1, PROX1, CYP27A1, HSD17B4, OSBPL3, OSBPL2, CYP7B1, CYP39A1, OSBPL7, SCP2, OSBPL6	Not Improvers	Shared
GO_SYNAPTIC_VESICLE_EXOCYTOSIS	0.00114349	0.0112022	0.45506	0.43116	1.71478	57	P2RY1, ADCY1, FBXL20, PFN2, PSEN1, RAB3A, PREPL, BACE1, STXBP1, STX19, NAPB, GRIK5, CASK, CHRNB2, SYT17, ADORA2B, FMR1, UNC13A, SNCA, UNC13B, SV2A, SNAP25, CPLX1, RAP1A	Not Improvers	Unique
GO_REGULATION_OF_B_CELL_PROLIFERATION	0.00116622	0.0113438	0.45506	0.568452	1.94985	26	IRS2, FCGR2B, INPP5D, CD74, BCL2, CHRNB2, RC3H1, CD22, PTPRC, TFRC, TNFSF13B, TLR4, VAV3, AHR, CD81	Not Improvers	Unique
GO_INTRACILIARY_TRANSPORT_INVOLVED_IN_CILIUM_ASSEMBLY	0.00121729	0.0117572	0.45506	0.665341	1.99425	16	DYNC2H1, KIF3A, IFT172, KIF3C, IFT81, IFT80, IFT27, IFT140, TRIP11	Not Improvers	Unique
GO_GLYCOPROTEIN_METABOLIC_PROCESS	0.00126803	0.0120893	0.45506	0.301296	1.46521	189	ABCA7, MUC13, GLCE, HEXA, ITM2C, MUC4, MUC20, MUC3A, NCCRP1, MUC15, MGAT4A, GCNT3, ADAMTS13, ITM2B, CHST9, TRAK1, HEXB, TMEM59, CHST4, RNF103, GALNT5, CSGALNACT1, AGA, DPY19L4, B4GALT6, DPY19L2, PSEN1, BCL2, TMTC2, UGGT2, SRD5A3, ENGASE, B4GALT5, VANGL2, B3GAT1, NAGPA, FBXO44, MAN2A2, IDUA, GOLPH3, GALNT13, FUT3, ST6GAL1, ALG12, TCF7L2, HS6ST3, ST8SIA5, TRIP11, C1GALT1C1, ST8SIA1, GFPT1, SLC35C1,…	Not Improvers	Unique
GO_LIPID_MODIFICATION	0.00129792	0.0122344	0.45506	0.349534	1.6136	123	CYP3A5, CYP24A1, PHYH, IRS2, ETFDH, ACAD10, MBOAT2, FA2H, CPT1A, PIK3C2B, SOCS6, HADHB, ABCG1, CYP4V2, CPT2, EFR3A, PI4KA, AGT, INPP5D, BDH2, HSD17B4, OCRL, EPHX2, PLPPR1, PPARGC1A, GBA, PIK3C2G, PLA2G7, FIG4, PIK3R3, CPT1C, ABCD4, SCP2, ACAA2, ECHS1, PIK3C2A, ACADM, SLC35C1, INPP5F, TYSND1, PIP5KL1, PTEN, DGKH	Not Improvers	Unique
GO_ACTION_POTENTIAL	0.00136051	0.0127804	0.45506	0.436621	1.70985	53	SLC8A1, P2RX4, KCNAB2, AKAP9, CAMK2D, ANK2, GPD1L, GBA, MYH14, ATP1B1, KCNA5, GNAQ, KCNQ1, KCNJ3, SCN3B, SCN2A, CHRNB2, CACNA2D1, KCND2, CACNA1H, FMR1, GJA1, KCNA2, SLC8A2, KCNMB2, CACNA1C, CACNB3, FGF12, NRCAM, GRIK2, CNTNAP1, AKAP6	Not Improvers	Unique
GO_POSITIVE_REGULATION_OF_ANION_TRANSPORT	0.00147099	0.0136176	0.45506	0.574402	1.93431	24	ABCA7, ARL6IP1, P2RX4, AGT, ATP8A1, PSEN1, MAP2K6, CFTR, STXBP1, ABCB4, PTAFR, SLC38A3, ABAT, ACSL5, SLC12A2, ABCB1	Not Improvers	Unique
GO_RECEPTOR_LOCALIZATION_TO_SYNAPSE	0.00150086	0.0137229	0.45506	0.528691	1.86917	29	CACNG4, ARHGAP44, ADAM22, STX7, SYNJ2BP, NSG1, DLG4, SHISA6, KIF5C, CEP112, MAPK10, LGI1, IQSEC2, SNAP25, CPLX1, RAP1A, RAB11A	Not Improvers	Unique
GO_AXON_DEVELOPMENT	0.00154374	0.0139292	0.45506	0.28064	1.40171	241	TSPAN2, TCTN1, ULK2, IRS2, CHL1, CNTN4, AMIGO1, MEGF8, NCAM1, NTN1, ADCY1, DPYSL2, NEO1, TRAK1, PLXNC1, GAB1, USP33, KIF13B, APP, GRN, SHH, KIF3A, SEMA5A, ZFYVE27, MAP2, NGFR, RND2, SLITRK6, SPG11, B4GALT6, SMO, SLIT1, ZSWIM8, PSEN1, BCL2, SPTBN4, LAMB2, RAB3A, PTPRO, L1CAM, RAP1GAP, B4GALT5, DHFR, VANGL2, PTCH1, RAC2, JAK2, TSKU, STXBP1, FGFR2, USP9X, SPTBN1, RTN4RL2, CHRNB2, PLXNB2, CDK5R1, MYC…	Not Improvers	Unique
GO_REGULATION_OF_SYNAPTIC_VESICLE_CYCLE	0.00182625	0.0161594	0.45506	0.431112	1.68828	53	P2RY1, SYT11, ADCY1, FBXL20, PFN2, NLGN2, RAB3A, PREPL, BACE1, STXBP1, NAPB, GRIK5, CASK, CHRNB2, CDK5R1, ADORA2B, FMR1, PTEN, VAMP4, SNCA, UNC13B, CPLX1, RAP1A	Not Improvers	Unique
GO_REGULATION_OF_SYNAPTIC_VESICLE_EXOCYTOSIS	0.00191001	0.0167921	0.45506	0.504425	1.8284	35	P2RY1, ADCY1, FBXL20, PFN2, RAB3A, PREPL, BACE1, STXBP1, NAPB, GRIK5, CASK, CHRNB2, ADORA2B, FMR1, UNC13B, CPLX1, RAP1A, APBA1	Not Improvers	Unique
GO_TRANSFERRIN_TRANSPORT	0.0020361	0.0176741	0.431708	0.636246	1.94189	17	ATP6AP1, ATP6V1A, ATP6V0A1, ATP6V1H, ATP6V0E2, ATP6V1D, ATP6V0D2, TFRC, ATP6V1C1, ATP6V1E1, CLTC, ATP6V0D1	Not Improvers	Unique
GO_VESICLE_CYTOSKELETAL_TRAFFICKING	0.00204687	0.0177116	0.431708	0.491676	1.74793	32	HAP1, MYO7B, WASL, TRAK1, BICDL1, KIF3A, MAP2, TANC2, DYNC1H1, MYO15A, BLOC1S5	Not Improvers	Unique
GO_REGULATION_OF_AUTOPHAGY	0.00210618	0.0181675	0.431708	0.30622	1.46972	171	RRAGD, DRAM2, ULK2, TRIM22, SCOC, SOGA1, VPS13C, RNF152, ATP6V1A, TMEM59, FLCN, USP33, CTSA, ATP6V0A1, PSAP, ATP6V1H, FBXL2, LAMTOR3, SPTLC2, ATP6V0E2, LEPR, GPR137B, BCL2, RAB39B, TPCN1, CISD2, GBA, SMCR8, TP53INP2, ATP6V1D, BNIP3L, DDIT3, RRAGB, SESN3, TAB3, USP30, TP53INP1, CLEC16A, ATP6V0D2, OSBPL7, DAPK1, PIK3C2A, CDK5R1, HERC1, TIGAR, MAPT, MID2	Not Improvers	Unique
GO_CARBOHYDRATE_DERIVATIVE_TRANSPORT	0.00211285	0.0181678	0.431708	0.475701	1.76676	41	SLC35A5, SLC17A5, SLC37A1, LBP, ABCG1, SLC5A1, PSAP, SLC37A2, NPC2, SLC17A4, SLC33A1, CYBA, SYTL2, SLC29A4, SLC29A3, SLC35C1, GJA1	Not Improvers	Unique
GO_BILE_ACID_METABOLIC_PROCESS	0.00213236	0.0182783	0.431708	0.566143	1.9065	24	CES1, PROX1, CYP27A1, HSD17B4, OSBPL3, OSBPL2, CYP7B1, CYP39A1, OSBPL7, SCP2, OSBPL6, KIT	Not Improvers	Shared
GO_CARBOHYDRATE_TRANSPORT	0.00227913	0.0192852	0.431708	0.412897	1.69546	64	SLC35A5, SLC5A9, IRS2, SLC17A5, STXBP4, SLC37A1, SLC5A3, SLC25A27, C2CD5, PLS1, SLC5A1, AQP7, SLC2A12, CREBL2, SLC37A2, MFSD4A, SORT1, STXBP3, OCLN, SLC45A1, RNASEL, SLC45A4, CLTCL1	Not Improvers	Unique
GO_GLUTAMATE_RECEPTOR_SIGNALING_PATHWAY	0.002292	0.0192852	0.431708	0.489711	1.77455	38	CACNG4, CNIH3, APP, CX3CL1, RGS9, NLGN2, KLHL24, PPARGC1A, FRRS1L, GNAQ, DLG4, GRIN2A, SHISA6, GRIK5, DAPK1, CDK5R1, FMR1, UNC13A, NECAB2	Not Improvers	Shared
GO_NEURAL_TUBE_PATTERNING	0.00234316	0.0196553	0.431708	0.614745	1.88221	18	TCTN1, ATP6AP2, SHH, SMO, PSEN1, PTCH1, IFT140	Not Improvers	Unique
GO_REGULATION_OF_MEMBRANE_POTENTIAL	0.00256634	0.021146	0.431708	0.304255	1.46029	171	CACNG4, SLC8A1, NNT, UCN3, GABBR1, CNIH3, SLC25A27, P2RX4, KCNAB2, PPP1R9A, APP, CRTC1, AKAP9, CAMK2D, PIEZO2, NLGN2, TMEM25, HCN3, ANK2, PSEN1, BCL2, ARRB2, GPD1L, CACNA1A, GLRB, GBA, MYH14, ATP1B1, KCNA5, GNAQ, BNIP3L, KCNQ1, KCTD7, CFTR, DLG4, KCNJ3, SCN3B, GRIN2A, MLLT11, GRIK5, KCNH8, SCN2A, NALCN, CHRNB2, CACNA2D1, BID, MAPT, ARL6IP5, KCNK16, KCND2, KCNJ11, NDUFS1, CACNA1H, ABAT, FMR1, GJA1…	Not Improvers	Unique
GO_CELLULAR_COMPONENT_MORPHOGENESIS	0.00265132	0.0217091	0.431708	0.257721	1.33576	347	TLR2, LZTS3, TCTN1, TMEM106B, ULK2, TMOD2, IRS2, CHL1, CNTN4, AMIGO1, MEGF8, ARHGAP44, PROX1, NCAM1, NTN1, ADCY1, CYFIP2, DPYSL2, WASL, NEO1, TRAK1, MDK, PLXNC1, GAB1, USP33, PPP1R9A, KIF13B, CNTNAP2, APP, SHH, KIF3A, SEMA5A, ZFYVE27, MAP2, CELSR2, NGFR, RND2, ABI2, SLITRK6, SPG11, B4GALT6, SMO, SH3GL2, ANK2, SLIT1, ZSWIM8, PSEN1, NCMAP, BCL2, SPTBN4, LAMB2, RAB3A, PTPRO, MYH14, FIG4, L1CAM, RAP1…	Not Improvers	Unique
GO_INSULIN_RECEPTOR_SIGNALING_PATHWAY	0.00297622	0.0238167	0.431708	0.394608	1.6295	65	ATP6AP1, IRS2, SOGA1, ATP6V1A, STXBP4, GKAP1, GRB14, C2CD5, GAB1, NCK1, AGT, ATP6V0A1, VWA2, RARRES2, ATP6V1H, FOXO4, IGFBP1, ATP6V0E2, PIK3R3, ATP6V1D, SESN3	Not Improvers	Unique
GO_MULTICELLULAR_ORGANISMAL_SIGNALING	0.00305342	0.0242564	0.431708	0.402425	1.67384	69	CACNG4, SLC8A1, STIM1, AHCYL1, P2RX4, CNTNAP2, ATP2B2, AGT, AKAP9, CAMK2D, ANK2, SPTBN4, GBA, MYH14, ATP1B1, KCNA5, KCNQ1, KCNJ3, SCN3B, SCN2A, CACNA2D1, KCND2, KCNJ11, CACNA1H, FMR1, GJA1, KCNA2, SLC8A2, CACNA2D3, TRPC1, KCNMB2, CACNA1C, CACNB3, FGF12, NRCAM, GRIK2, CNTNAP1	Not Improvers	Unique
GO_REGULATION_OF_CATION_TRANSMEMBRANE_TRANSPORT	0.00312164	0.0246053	0.431708	0.323597	1.49792	129	SESTD1, HAP1, CACNG4, AMIGO1, SLC8A1, PKD2, TMEM38A, STIM1, HPCA, WNK1, CNIH3, KCNAB2, BPIFA1, APP, AGT, PLCG2, AKAP9, CX3CL1, GNB5, CAMK2D, RGS9, NLGN2, GSTM2, KLHL24, ANK2, GPD1L, PPARGC1A, ATP1B1, KCNQ1, DLG4, STOM, CTSS, CNKSR3, KCNS1, SCN3B, CYBA, GRIN2A, SHISA6, DAPK1, JSRP1	Not Improvers	Unique
GO_NEGATIVE_REGULATION_OF_LEUKOCYTE_PROLIFERATION	0.00322713	0.0251478	0.431708	0.484164	1.72122	32	SPN, TNFRSF14, ARG2, SHH, FCGR2B, HLA-DRB1, INPP5D, GPNMB, PDE5A, RC3H1, TWSG1, BTN2A2, IDO1, CD86	Not Improvers	Unique
GO_VACUOLAR_TRANSPORT	0.00333734	0.0257869	0.431708	0.373953	1.60519	78	TMEM106B, LAMP2, CACNG4, LAMP1, IGF2R, VPS13C, VPS13A, SCARB2, TRAK1, EPG5, TMEM50B, ATG14, VPS41, GRN, PSAP, LEPROTL1, SORT1, NAGPA, CLEC16A, SNX27, HOOK3, ATP6V0D2, AKTIP, VPS37A, SNX16, CHMP1B, RAB7B, ZFYVE16	Not Improvers	Unique
GO_TORC1_SIGNALING	0.00344654	0.0264814	0.431708	0.562763	1.84543	22	RRAGD, RNF152, FLCN, GPR137B, SMCR8, RRAGB, SESN3, CLEC16A, CASTOR2	Not Improvers	Unique
GO_ORGANIC_ACID_TRANSPORT	0.00347389	0.026617	0.431708	0.322583	1.49481	131	PLA2G2A, ARL6IP1, IRS2, SLC26A4, NOS2, SLC17A5, CEACAM1, CES1, SLC25A20, CPT1A, SLC46A1, LCN12, ABCG2, P2RX4, CPT2, AGT, SLC7A8, SLC6A20, PSAP, SLC16A3, NCOA2, NFE2L1, SLC17A4, PSEN1, SLC38A6, MAP2K6, RAB3A, SLC7A14, STXBP1, ABCD4, SLC29A4, ABCB4, NF1, SLC16A6, ARL6IP5, SLC7A7, SLC38A3, ABAT, EMB, MPC2, ACSL5, GJA1, SLCO1A2, SLC12A2	Not Improvers	Unique
GO_CERAMIDE_METABOLIC_PROCESS	0.00357873	0.0272679	0.431708	0.443799	1.66903	44	ITGB8, HEXA, ASAH1, FA2H, HEXB, SMPD1, GM2A, GALC, CERS6, PSAP, B4GALT6, SPTLC2, GBA, B4GALT5, NAGA, ACER3, FUT3	Not Improvers	Shared
GO_STEROL_TRANSPORT	0.0036031	0.027302	0.431708	0.438154	1.67373	48	ABCA7, NPC1L1, CES1, ABCA1, GRAMD1B, OSBP2, ABCG1, GRAMD1C, SHH, NPC2, MSR1, OSBPL3, OSBPL2, PTCH1, CFTR, ABCB4, OSBPL7, SCP2, LIPC, OSBPL6	Not Improvers	Unique
GO_HORMONE_METABOLIC_PROCESS	0.00366853	0.027645	0.431708	0.35342	1.53066	84	UGT1A1, CYP3A5, ATP6AP2, CPQ, RBP4, CES1, CHST9, DUOXA2, DUOX2, AKR1B10, HSD17B2, HSD17B14, SHH, DHRS13, SCPEP1, LRAT, HSD17B4, PPARGC1A, SRD5A3, PCSK4, HPN, ERO1B, SRD5A1, PCSK2, TCF7L2, CPE, RETSAT, CACNA1H, ADH1C, H6PD, PRLHR	Not Improvers	Shared
GO_CELLULAR_ION_HOMEOSTASIS	0.00368758	0.0277124	0.431708	0.265016	1.34443	267	CP, P2RY1, ATP6AP1, HAP1, ATP6AP2, SLC12A5, SLC8A1, PKD2, TMEM38A, STIM1, ATP6V1A, SAA1, SLC46A1, MCOLN3, TMPRSS3, HEXB, WFS1, PLCE1, SLC25A27, ABCG2, CLCN3, CCL28, P2RX4, ATP13A4, FFAR1, ATP2B2, APP, AGT, GRN, PLCG2, ATP6V0A1, SLC30A4, CX3CL1, ATP6V1H, CAMK2D, SLC40A1, ATP2C1, CLN5, GSTM2, DMXL2, CALCA, ANK2, PSEN1, ATP6V0E2, BCL2, CACNA1A, HEPH, TPCN1, ATP1B1, KCNA5, ATP6V1D, DDIT3, KCTD7, JAK2…	Not Improvers	Unique
GO_CELLULAR_RESPONSE_TO_NITROGEN_COMPOUND	0.00378181	0.0281125	0.431708	0.264985	1.36851	308	RRAGD, AOC1, KAT2B, P2RY1, ATP6AP1, DENND4C, IRS2, GDF15, CEACAM1, AMIGO1, SLC8A1, PKD2, TMEM38A, SOGA1, ADCY1, ATP6V1A, STXBP4, EPG5, GKAP1, RAB8B, GRB14, C2CD5, GAB1, LPIN2, NCK1, AHCYL1, P2RX4, APP, AGT, GJB2, FCGR2B, AKAP9, ATP6V0A1, VWA2, NSG1, RARRES2, ATP6V1H, GNB5, NGFR, RGS9, PRKAR2B, GSTM2, LAMTOR3, HCN3, FOXO4, IGFBP1, PSEN1, ATP6V0E2, NOX4, ARRB2, CACNA1A, PPARGC1A, COL16A1, PIK3R3, A…	Not Improvers	Unique
GO_POSITIVE_REGULATION_OF_TRANSPORTER_ACTIVITY	0.00381835	0.0283074	0.431708	0.429962	1.62716	47	HAP1, CACNG4, AMIGO1, PKD2, STIM1, WNK1, PLCG2, AKAP9, RGS9, GSTM2, ANK2, ATP1B1, KCTD7, CFTR, CTSS, CNKSR3, PTAFR, CACNA2D1, KCNJ11	Not Improvers	Unique
GO_ORGANIC_ACID_CATABOLIC_PROCESS	0.00401982	0.0294823	0.407018	0.32239	1.46766	116	GUSB, HGD, PCYOX1, HEXA, PHYH, IRS2, NOS2, ETFDH, QDPR, ACAD10, HIBADH, CPT1A, HEXB, ARG2, HADHB, LPIN2, CYP4F3, ALDH6A1, CPT2, ABHD10, BDH2, HSD17B4, BCKDHB, CPT1C, ABCD4, LPIN3, IDUA, SCP2, ACAA2, ECHS1, FTCD, RENBP, ACADM, ABAT, OAT, PAH, IDO1, TYSND1	Not Improvers	Shared
GO_CARBOHYDRATE_METABOLIC_PROCESS	0.00410148	0.0298058	0.407018	0.260804	1.33212	281	UGT1A1, GUSB, GLB1, KAT2B, P2RY1, GAA, UGT1A6, HEXA, IRS2, RBP4, ANGPTL3, SOGA1, ALDH2, GCNT3, CPT1A, CHI3L1, SCARB2, CHST9, HEXB, CHST4, GNPTG, SLC5A3, SIAE, CSGALNACT1, GM2A, APP, MAN2B2, AGL, RORA, GALT, ABHD10, NCOA2, B4GALT6, NFE2L1, PSEN1, OCRL, GANC, LEPR, GPD1L, MGAM, PC, HECTD4, PPARGC1A, UGT2B15, MST1, NISCH, PPP1CB, B4GALT5, NPY1R, NAGA, OVGP1, B3GAT1, NAGPA, PPP1R1A, GCG, MAN2A2, IDUA…	Not Improvers	Shared
GO_REGULATION_OF_TORC1_SIGNALING	0.0041074	0.0298058	0.407018	0.600623	1.86862	19	RRAGD, RNF152, FLCN, GPR137B, SMCR8, RRAGB, SESN3, CLEC16A, CASTOR2	Not Improvers	Unique
GO_VESICLE_LOCALIZATION	0.00425456	0.0306306	0.407018	0.321807	1.465	116	HAP1, MLPH, SYT11, MYO7B, BBS2, WASL, AREG, TRAK1, CNIH3, BICDL1, KIF3A, MAP2, SPG11, NLGN2, GPR143, PSEN1, RAB3A, WDR11, TANC2, LIN7A, DYNC1H1, SAR1B, TRIP11, KIF5C, MYO15A, BLOC1S5	Not Improvers	Unique
GO_CELL_PART_MORPHOGENESIS	0.00427996	0.0307328	0.407018	0.26485	1.36807	314	LZTS3, TCTN1, TMEM106B, ULK2, IRS2, CHL1, CNTN4, AMIGO1, MEGF8, ARHGAP44, NCAM1, NTN1, ADCY1, CYFIP2, DPYSL2, WASL, NEO1, TRAK1, MDK, PLXNC1, GAB1, USP33, PPP1R9A, KIF13B, CNTNAP2, APP, SHH, KIF3A, SEMA5A, ZFYVE27, MAP2, CELSR2, NGFR, RND2, ABI2, SLITRK6, SPG11, B4GALT6, SMO, SH3GL2, SLIT1, ZSWIM8, PSEN1, BCL2, SPTBN4, LAMB2, RAB3A, PTPRO, MYH14, L1CAM, RAP1GAP, B4GALT5, VANGL2, PTCH1, RAC2, TSKU…	Not Improvers	Unique
GO_MYELOID_LEUKOCYTE_MEDIATED_IMMUNITY	0.00431354	0.0308436	0.407018	0.264595	1.33492	260	QPCT, TLR2, GUSB, AOC1, GLB1, LAMP2, PTPRJ, GAA, LYZ, ATP6AP2, SERPINB3, GNS, LAMP1, TCN1, ASAH1, CEACAM1, IGF2R, PTPRN2, PIGR, PLAC8, CHI3L1, PRCP, YPEL5, HEXB, DPP7, ADA2, SLPI, TIMP2, GM2A, KCNAB2, AGA, CHGA, CTSA, GRN, FCGR2B, AGL, ATP8A1, ARSA, ATP6V0A1, PSAP, ATP8B4, NPC2, LAMTOR3, CTSD, PSEN1, MGAM, STXBP3, DNASE1, RAB3A, CSTB, ATP6V1D, HLA-C, HSPA1B, TMEM63A, RAC2, CMTM6, STOM, STXBP1, CT…	Not Improvers	Unique
GO_MONOCARBOXYLIC_ACID_BIOSYNTHETIC_PROCESS	0.00431788	0.0308436	0.407018	0.367096	1.58796	82	HACD3, CEACAM1, FA2H, CES1, PROX1, CBR4, ELOVL7, ACCS, GSTM2, CYP27A1, CD74, HSD17B4, EPHX2, OSBPL3, OSBPL2, CYP7B1, ALOX5AP, CYP39A1, HACD4, OSBPL7, SCP2, LIPH, LIPC, OSBPL6, GPX4, ABAT, ERLIN2, IDO1, HACD2, DSE, ASAH2, CYP1A1	Not Improvers	Unique
GO_CENTRAL_NERVOUS_SYSTEM_NEURON_DIFFERENTIATION	0.00437288	0.0310746	0.407018	0.366415	1.58501	82	TCTN1, NANOS1, PROX1, DYNC2H1, SHH, RORA, MAP2, PSAP, B4GALT6, SMO, NFE2L1, PSEN1, SPTBN4, TTLL1, B4GALT5, IFT172, PTCH1, TSKU, FGFR2, CHRNB2, MYCBP2, HERC1, MAPT, ERBB4, KNDC1, ROBO1, NIN, PLXNA3, SLC4A10, FAIM2, PTEN, DCLK2, NR4A2, RAC3	Not Improvers	Unique
GO_REGULATION_OF_METAL_ION_TRANSPORT	0.00438889	0.0311079	0.407018	0.306602	1.44412	150	SESTD1, HAP1, AMIGO1, SLC8A1, PKD2, TMEM38A, STIM1, WFS1, HPCA, WNK1, AHCYL1, P2RX4, KCNAB2, BPIFA1, FFAR1, AGT, PLCG2, AKAP9, CX3CL1, GNB5, CAMK2D, RGS9, GSTM2, KLHL24, ANK2, BCL2, ARRB2, SPTBN4, GPD1L, CAMK2G, ATP1B1, KCNA5, KCNQ1, SARAF, GCG, STOM, CNKSR3, KCNS1, SCN3B, CYBA, CNTN1, BEST1, CASK, JSRP1, PML, TRPV3, CACNA2D1	Not Improvers	Unique
GO_GLIAL_CELL_MIGRATION	0.00440139	0.031116	0.407018	0.556604	1.80526	21	P2RY1, HEXB, P2RX4, CX3CL1, CDK5R1, SRGAP2, CSF1, CERS2	Not Improvers	Unique
GO_CELLULAR_RESPONSE_TO_TOXIC_SUBSTANCE	0.00452201	0.0316425	0.407018	0.433472	1.65585	48	PIM1, NNT, DUOX2, NQO1, AKR1B10, ABCG2, PPP1R9A, GSTM2, GPX2, ALOX5AP, DHFR, TP53INP1, GSTK1, IPCEF1, PRDX2, GPX4	Not Improvers	Unique
GO_CELLULAR_MODIFIED_AMINO_ACID_METABOLIC_PROCESS	0.00460665	0.03199	0.407018	0.355202	1.53927	83	PLA2G2A, VNN3, PCYOX1, CPQ, CPT1A, SLC46A1, SERINC2, DUOXA2, ABHD12, DUOX2, CKMT1B, PLA1A, GSTM2, CKMT1A, NFE2L1, DHFR, HPN, CPT1C, GSTK1, HAGH, FTCD, LPCAT4, ACADM, GGT6, GPX4	Not Improvers	Shared
GO_POSITIVE_REGULATION_OF_TRANSMEMBRANE_TRANSPORT	0.00488249	0.0335743	0.407018	0.354192	1.53489	83	ARL6IP1, HAP1, IRS2, CACNG4, AMIGO1, PKD2, STIM1, WNK1, C2CD5, AGT, PLCG2, AKAP9, CREBL2, CX3CL1, RGS9, GSTM2, ANK2, PSEN1, OCLN, ATP1B1, KCNQ1, CFTR, CTSS, CNKSR3, PTAFR, RNASEL, CLTCL1, CACNA2D1, KCNJ11	Not Improvers	Unique
GO_LIPID_LOCALIZATION	0.00488375	0.0335743	0.407018	0.287895	1.38787	179	PLA2G2A, ABCA7, NPC1L1, IRS2, NOS2, RBP4, ANGPTL3, CEACAM1, CES1, SLC25A20, ABCA1, ATP10B, CPT1A, GRAMD1B, SCARB2, LCN12, HEXB, GULP1, OSBP2, LBP, ABCG1, GM2A, P2RX4, CPT2, ATP10D, AGT, GRAMD1C, SHH, ATP8A1, PSAP, ATP8B4, NPC2, NCOA2, LRAT, ZFYVE1, MSR1, MAP2K6, OSBPL3, OSBPL2, PTCH1, CFTR, ABCA9, ABCD4, ABCB4, PLA2G4C, OSBPL7, SCP2, LIPC, STOML1, APOL1, OSBPL6, ATP8B2	Not Improvers	Unique
GO_RESPONSE_TO_INSULIN	0.00490774	0.0336548	0.407018	0.319752	1.48007	124	TLR2, KAT2B, ATP6AP1, DENND4C, IRS2, CEACAM1, SOGA1, VPS13C, ATP6V1A, STXBP4, GKAP1, RAB8B, GRB14, C2CD5, GAB1, LPIN2, NCK1, AGT, ATP6V0A1, VWA2, RARRES2, ATP6V1H, FOXO4, IGFBP1, SORT1, ATP6V0E2, STXBP3, PIK3R3, ATP6V1D, SESN3, SRD5A1, LPIN3	Not Improvers	Unique
GO_LEUKOCYTE_MEDIATED_IMMUNITY	0.00516974	0.0349275	0.407018	0.248239	1.27764	332	QPCT, TLR2, GUSB, AOC1, GLB1, LAMP2, PTPRJ, GAA, LYZ, ATP6AP2, SERPINB3, GNS, NOS2, LAMP1, TCN1, ASAH1, CEACAM1, IGF2R, PTPRN2, PIGR, GCNT3, PLAC8, CHI3L1, PRCP, YPEL5, HEXB, DPP7, ADA2, STX7, HLA-DQB1, SLPI, SERPINB4, TIMP2, GM2A, C4BPA, KCNAB2, AGA, CHGA, CTSA, GRN, FCGR2B, AGL, ATP8A1, ARSA, ATP6V0A1, HLA-DRB1, PSAP, ATP8B4, INPP5D, NPC2, LAMTOR3, CD74, TNFSF13, CTSD, PSEN1, ARRB2, MGAM, STXBP…	Not Improvers	Shared
GO_NON_MOTILE_CILIUM_ASSEMBLY	0.00527078	0.0352628	0.407018	0.515991	1.79382	27	HAP1, BBS2, DYNC2H1, CEP126, TTC8, VANGL2, IFT172, IFT80, INTU, IFT140, TOGARAM1, C2CD3, TMEM80	Not Improvers	Unique
GO_CELLULAR_RESPONSE_TO_INSULIN_STIMULUS	0.00530984	0.0354377	0.407018	0.341695	1.52571	101	KAT2B, ATP6AP1, DENND4C, IRS2, CEACAM1, SOGA1, ATP6V1A, STXBP4, GKAP1, RAB8B, GRB14, C2CD5, GAB1, LPIN2, NCK1, AGT, ATP6V0A1, VWA2, RARRES2, ATP6V1H, FOXO4, IGFBP1, ATP6V0E2, PIK3R3, ATP6V1D, SESN3, SRD5A1, LPIN3, ATP6V0D2	Not Improvers	Unique
GO_NEGATIVE_REGULATION_OF_T_CELL_PROLIFERATION	0.0053628	0.0356871	0.407018	0.553594	1.84295	23	SPN, TNFRSF14, ARG2, SHH, HLA-DRB1, GPNMB, PDE5A, RC3H1, TWSG1, BTN2A2, IDO1, CD86	Not Improvers	Shared
GO_INTRACILIARY_TRANSPORT	0.00537324	0.0356871	0.407018	0.565778	1.82299	20	TTC21A, DYNC2H1, KIF3A, IFT172, KIF3C, IFT81, IFT80, IFT27, IFT140, TRIP11	Not Improvers	Unique
GO_G_PROTEIN_COUPLED_RECEPTOR_SIGNALING_PATHWAY	0.00560623	0.036966	0.407018	0.263698	1.3455	279	ECEL1, GRK3, CCL20, P2RY1, GNAZ, TMOD2, PDE8B, ADGRV1, IGF2R, ABCA1, ADCY1, SAA1, GPR179, AREG, MRAP2, UCN3, PLCE1, GABBR1, VIPR1, MCF2L, SOS2, ATRNL1, CCL28, AHCYL1, USP33, FFAR1, CHGA, APP, AGT, OR2I1P, CX3CL1, PSAP, CELSR2, GNB5, RGS9, PLCB4, TM2D1, GPR143, SMO, CALCA, SORT1, ARRB2, GPR119, SSTR2, GNG7, GPR37, SORCS1, GLRB, OPN3, GNAQ, NPY1R, ARHGEF12, OBSCN, SST, FRMPD1, RAC2, JAK2, GCG, ADGR…	Not Improvers	Unique
GO_REACTIVE_NITROGEN_SPECIES_METABOLIC_PROCESS	0.00569395	0.0374544	0.407018	0.466608	1.65881	32	TLR2, NOS2, PKD2, ARG2, NQO1, P2RX4, AGT, RORA, JAK2, ACP5, ASS1, TLR4, AIF1, TNF, KLF4, POR, ZC3H12A, CD36	Not Improvers	Unique
GO_SENSORY_PERCEPTION_OF_MECHANICAL_STIMULUS	0.00590651	0.0386672	0.407018	0.370811	1.57781	72	GSDME, SLC26A4, CLIC5, ADGRV1, MYO7B, TMPRSS3, HEXB, WFS1, MBP, TFAP2A, P2RX4, ATP2B2, GJB2, PSAP, PIEZO2, SLITRK6, SPTBN4, RAB3A, MYH14, USH2A, PJVK, KCNQ1, HPN, BACE1	Not Improvers	Unique
GO_CARDIAC_CONDUCTION	0.00597815	0.039043	0.407018	0.427181	1.63181	48	CACNG4, SLC8A1, STIM1, AHCYL1, ATP2B2, AGT, AKAP9, CAMK2D, ANK2, SPTBN4, ATP1B1, KCNA5, KCNQ1, KCNJ3, SCN3B, CACNA2D1, KCND2, KCNJ11, GJA1, SLC8A2, CACNA2D3, TRPC1, CACNA1C, CACNB3	Not Improvers	Unique
GO_ENSHEATHMENT_OF_NEURONS	0.0062402	0.04037	0.407018	0.393164	1.56366	57	TSPAN2, TLR2, AMIGO1, FA2H, HEXB, ADAM22, MBP, BCAS1, GALC, PSAP, B4GALT6, ANK2, NCMAP, FIG4, B4GALT5, ACER3, NF1, SCN2A, SBF2, TENM4	Not Improvers	Unique
GO_IMPORT_ACROSS_PLASMA_MEMBRANE	0.00630935	0.0407213	0.407018	0.372202	1.51235	62	ARL6IP1, IRS2, SLC12A5, SLC8A1, SLC46A1, SLC5A3, WNK1, SLC5A1, SLC12A6, AGT, SLC7A8, SLC6A20, SLC15A1, PSEN1, ATP1B1, KCNJ3, TRPV3, TRPV4, CACNA2D1, ARL6IP5, KCNJ11, KCNJ16, ACSL5, TRPV6, SLC12A2, SLC8A2	Not Improvers	Unique
GO_PROTEIN_LOCALIZATION_TO_CILIUM	0.00639022	0.0411464	0.407018	0.511898	1.75586	26	TCTN1, RAB29, TTC21A, INVS, DYNC2H1, EFCAB7, ATP6V1D, IFT80, IFT140	Not Improvers	Unique
GO_MULTICELLULAR_ORGANISMAL_HOMEOSTASIS	0.00644535	0.0414042	0.407018	0.276915	1.3744	229	ATP6AP1, MUC13, LYZ, TPP1, DRAM2, MUC4, RBP4, ADGRV1, AKAP11, FA2H, NANOS1, PIGR, ADCY1, PLAC8, BBS2, PRCP, MRAP2, WFS1, MBP, FLCN, P2RX4, POC1B, BPIFA1, CPT2, CRTC1, SLC40A1, PIWIL4, INPP5D, IL1A, PRKAR2B, LNPEP, SMO, SH3GL2, CALCA, NOX4, LEPR, GPR137B, BCL2, SLC22A5, PPARGC1A, MAP2K6, OCLN, GBA, TP53INP2, USH2A, ERCC6, DDIT3, RAC2, JAK2, CFTR, DCSTAMP, CTSH, NAPEPLD, TRPM8, OMA1, NF1, ACP5, DYN…	Not Improvers	Unique
GO_PRIMARY_ALCOHOL_METABOLIC_PROCESS	0.00673822	0.0427012	0.407018	0.470136	1.68963	34	CYP3A5, RBP4, GDPD1, ALDH2, CBR4, AKR1B10, SULT1C4, NAAA, DHRS13, LRAT, NAPEPLD, RETSAT, CACNA1H, ADH1C, H6PD, BCO1, CYP1A1	Not Improvers	Unique
GO_METAL_ION_HOMEOSTASIS	0.00676472	0.0427012	0.407018	0.259998	1.30892	257	CP, P2RY1, ATP6AP1, HAP1, STEAP2, SLC12A5, SLC8A1, PKD2, TMEM38A, STIM1, ATP6V1A, SAA1, SLC46A1, MCOLN3, NEO1, TMPRSS3, HEXB, WFS1, PLCE1, SLC25A27, STEAP4, ABCG2, CCL28, P2RX4, ATP13A4, SLC12A6, FFAR1, ATP2B2, APP, AGT, SLC7A8, PLCG2, CNNM2, SLC30A4, CX3CL1, CAMK2D, SLC40A1, ATP2C1, BDH2, GSTM2, FAM20A, CALCA, ANK2, PSEN1, BCL2, CACNA1A, TMTC2, HEPH, TPCN1, ATP1B1, KCNA5, DDIT3, KCTD7, JAK2, DLG…	Not Improvers	Unique
GO_RESPONSE_TO_XENOBIOTIC_STIMULUS	0.00709077	0.0441744	0.407018	0.430059	1.61736	44	UGT1A1, AOC1, CYP3A5, ALDH3A1, UGT1A6, CES1, NQO1, CYP2U1, RORA, ARNT2, GSTM2, UGT2B15, CYP2J2, EPHX1, TIGAR, RB1, CYP1A1, AHR, N6AMT1, ACY3, GGT1, CYB5R3	Not Improvers	Shared
GO_RELAXATION_OF_MUSCLE	0.00710204	0.0441744	0.407018	0.632234	1.86123	15	P2RY1, SLC8A1, P2RX4, CHGA, CAMK2D, GSTM2, ATP1B1, GUCY1A1, PDE5A, ADORA2B	Not Improvers	Unique
GO_EXPORT_ACROSS_PLASMA_MEMBRANE	0.00750965	0.0459799	0.407018	0.497599	1.72988	27	SLC8A1, ABCA1, ABCG2, ABCC5, SLC40A1, RGS9, SLC22A5, ATP1B1, KCNA5, KCNQ1, SLC29A4, KCNT2, PDZK1, GJA1, KCNA2, SLC8A2, ABCB1	Not Improvers	Unique
GO_ORGANOPHOSPHATE_ESTER_TRANSPORT	0.00755924	0.0461804	0.407018	0.389634	1.55454	58	ABCA7, ABCA1, ATP10B, SCARB2, EPG5, SLC37A1, ABCG1, SLC44A4, ATP10D, ATP8A1, SLC37A2, ATP8B4, NPC2, SLC33A1, OSBPL2, ABCB4, SCP2, ATP8B2, ATP9B, PLSCR4, GJA1	Not Improvers	Unique
GO_PROTEIN_LOCALIZATION_TO_POSTSYNAPSE	0.00778951	0.047167	0.407018	0.503871	1.72833	26	CACNG4, ARHGAP44, ADAM22, NSG1, DLG4, GRIN2A, SHISA6, KIF5C, MAPK10, LGI1, IQSEC2, SNAP25, CPLX1, RAP1A, RAB11A	Not Improvers	Unique
GO_DETECTION_OF_STIMULUS	0.00787862	0.047289	0.38073	0.338384	1.49202	91	TLR2, PTPRJ, ADGRV1, PKD2, PIGR, STIM1, PLEKHB1, UNC119, LBP, NAIP, OR2I1P, HLA-DRB1, CDHR2, NGFR, PIEZO2, DACH1, SMO, EYS, CALCA, ARRB2, OPN3, GNAQ, TLR1, HPN, BACE1, TRPM8, BEST1, CABP4, RTP4, NEK1, WDR48, CD1D, KIT	Not Improvers	Unique
GO_CHLORIDE_TRANSPORT	0.00811389	0.0481017	0.38073	0.458636	1.67166	37	PCYOX1, ANO5, SLC26A4, CLIC5, CLIC6, SLC12A5, CLCN4, CLCN3, SLC12A6, CLCNKB, CLCN5, GLRB, CFTR, PTAFR, BEST1, APOL1, SLC4A10, SLC12A2, ABCB1, GABRB3	Not Improvers	Unique
GO_CELLULAR_RESPONSE_TO_PEPTIDE	0.00822241	0.0486079	0.38073	0.281388	1.35652	178	KAT2B, ATP6AP1, DENND4C, IRS2, GDF15, CEACAM1, SOGA1, ADCY1, ATP6V1A, STXBP4, GKAP1, RAB8B, GRB14, C2CD5, GAB1, LPIN2, NCK1, AHCYL1, APP, AGT, GJB2, FCGR2B, ATP6V0A1, VWA2, RARRES2, ATP6V1H, NGFR, PRKAR2B, FOXO4, IGFBP1, PSEN1, ATP6V0E2, CACNA1A, PIK3R3, ATP6V1D, SESN3, JAK2, BACE1, GCG, SRD5A1, LPIN3, CYBA, ATP6V0D2	Not Improvers	Unique
GO_IRON_ION_TRANSPORT	0.00836757	0.0492537	0.38073	0.454757	1.61668	32	CP, ATP6AP1, ATP6V1A, SLC46A1, SLC48A1, ATP6V0A1, ATP6V1H, SLC40A1, ATP6V0E2, HEPH, ATP6V1D, ATP6V0D2, TFRC, ATP6V1C1, ATP6V1E1, CLTC, ATP6V0D1	Not Improvers	Unique
GO_TRANSPORT_ALONG_MICROTUBULE	0.00846062	0.0496948	0.38073	0.363425	1.54638	72	HAP1, LAMP1, TTC21A, TRAK1, BICDL1, APP, DYNC2H1, KIF3A, MAP2, SPG11, IFT172, KIF3C, IFT81, IFT80, IFT27, IFT140, DYNC1H1, TRIP11, MAPT, KIF5C	Not Improvers	Unique

## Sheet: Negatively enriched
Table S7b. GSEA analysis result showed many GO biological processes with significant negative enrichment in "cultured" vs "basal" islet transcriptomes
TERM	pval	padj	log2err	ES	NES	size	leadingEdge	Group	Unique/Shared
GO_CELLULAR_NITROGEN_COMPOUND_CATABOLIC_PROCESS	1e-10	2.3e-08	NA	-0.464907	-1.98653	355	PNP, ZFP36, PSMC3, IL6, PDE4B, PSME2, FEN1, PSMD14, NT5E, POP1, PSMD7, PSMD4, APEX1, PSMB7, PSMD3, PKP1, RPL35, RPS9, PSMB3, PSMB6, RPL41, EIF4G1, PSMC5, PSMB5, RPS5, PNRC2, IDO1, EXOSC2, DKC1, RPL10, FUS, GSPT1, EIF4A3, PSMC2, HSPB1, EXOSC4, RPL27, RPS21, LSM4, SND1, RPL28, PELO, RPS27A, RPS7, DIS3L2, RPLP0, RPLP2, RPS12, PSMD6, EXOSC8, ITPA, RPS19, MYD88, KPNA1, ZPR1, RPL21, BTG2, APOBEC2, NSUN…	Improvers	Shared
GO_CYTOKINE_MEDIATED_SIGNALING_PATHWAY	1e-10	2.3e-08	NA	-0.447537	-1.93258	419	IL13RA2, FGF2, MMP1, CSF3, SOCS3, IL1RL1, CCR7, LIF, TSLP, IL1B, S1PR1, IL18BP, IL11, IL24, HGF, CAV1, JUNB, PSMC3, MT2A, TRAF1, IFI35, IL6, MYC, IL1R2, NFKBIA, IL17RB, RSAD2, TNFAIP3, PSME2, TNFRSF1A, CCL7, PLVAP, TNFRSF12A, IL33, CLCF1, PSMD14, CDKN1A, IL1RN, PSMD7, PSMD4, PSMB7, PSMD3, PDGFB, SPHK1, CSF2RB, SLIT3, IL15RA, PSMB3, STX1A, PSMB6, IL1R1, PLP2, PSMC5, PSMB5, TNFRSF11A, OSMR, CCND1, …	Improvers	Shared
GO_NCRNA_METABOLIC_PROCESS	1e-10	2.3e-08	NA	-0.596711	-2.49664	291	IL6, FTSJ1, POP1, BMS1, HEATR1, PDCD11, GTPBP4, QTRT2, RPL35, RPS9, AIMP2, DDX54, RRP9, NOP58, DCAF13, PES1, RAN, EXOSC2, EIF6, DKC1, NHP2, DHX37, NOC4L, EIF4A3, WDR3, SRRT, DIMT1, MAK16, NOL8, UTP6, NOP14, NOL10, TRMT6, FAM207A, TSR1, CTU2, WDR74, GEMIN4, EXOSC4, RPL27, RPS21, FARS2, SND1, PELO, RPS7, XPO5, DIS3L2, PPA1, EXOSC8, RPS19, PUS7, UTP11, NOLC1, GPAT2, DDX56, TOE1, POP7, NSUN2, ELAC2, …	Improvers	Shared
GO_NCRNA_PROCESSING	1e-10	2.3e-08	NA	-0.61351	-2.51953	248	IL6, FTSJ1, POP1, BMS1, HEATR1, PDCD11, GTPBP4, QTRT2, RPL35, RPS9, DDX54, RRP9, NOP58, DCAF13, PES1, EXOSC2, EIF6, DKC1, NHP2, DHX37, NOC4L, EIF4A3, WDR3, SRRT, DIMT1, MAK16, NOL8, UTP6, NOP14, NOL10, TRMT6, FAM207A, TSR1, CTU2, WDR74, GEMIN4, EXOSC4, RPL27, RPS21, FARS2, RPS7, EXOSC8, RPS19, PUS7, UTP11, NOLC1, DDX56, TOE1, POP7, NSUN2, ELAC2, UTP14A, URM1, KRI1, ABT1, SART1, TRMT1, NOP56, UTP4…	Improvers	Shared
GO_NUCLEAR_TRANSCRIBED_MRNA_CATABOLIC_PROCESS	1e-10	2.3e-08	NA	-0.627981	-2.40693	136	ZFP36, RPL35, RPS9, RPL41, EIF4G1, RPS5, PNRC2, EXOSC2, RPL10, GSPT1, EIF4A3, EXOSC4, RPL27, RPS21, LSM4, RPL28, PELO, RPS27A, RPS7, DIS3L2, RPLP0, RPLP2, RPS12, EXOSC8, RPS19, RPL21, BTG2, RPL17, RPS29, RPL29, RPS4Y1, ETF1, RPL9, RPL37A, CNOT9, RPL12, LSM6, RPS15, RPL13, RPL39, RPL36, POLR2G, RPL24, DHX34, RPS14, RPS3, RPL7, MAGOHB, SMG6, WDR61, ZFP36L1, RPS11, XRN2, RBM8A, RPL11, ZC3H12A, RPL30…	Improvers	Shared
GO_NUCLEAR_TRANSCRIBED_MRNA_CATABOLIC_PROCESS_NONSENSE_MEDIATED_DECAY	1e-10	2.3e-08	NA	-0.70703	-2.45826	73	RPL35, RPS9, RPL41, EIF4G1, RPS5, PNRC2, RPL10, GSPT1, EIF4A3, RPL27, RPS21, RPL28, RPS27A, RPS7, RPLP0, RPLP2, RPS12, RPS19, RPL21, RPL17, RPS29, RPL29, RPS4Y1, ETF1, RPL9, RPL37A, RPL12, RPS15, RPL13, RPL39, RPL36, RPL24, DHX34, RPS14, RPS3, RPL7, MAGOHB, SMG6, RPS11, RBM8A, RPL11, RPL30, UBA52, RPS4X, RPS13, RPS26, RPL7A, RPS16, RPL14, RPL6, RPL31, RPS25	Improvers	Shared
GO_PEPTIDE_BIOSYNTHETIC_PROCESS	1e-10	2.3e-08	NA	-0.488869	-2.11631	425	ZFP36, IL6, FTSJ1, ITGA2, EIF5A, RPL35, EEF1B2, RPS9, RPL41, AIMP2, EIF3B, JMJD4, MPV17L2, EIF4G1, BCL3, RPS5, EIF2B3, EIF6, MRPL3, RPL10, GSPT1, EIF4A3, EIF2S1, EIF4EBP1, HSPB1, GAPDH, RPL27, TCOF1, RPS21, NCL, THBS1, FARS2, RPL28, EIF5B, RPS27A, RPS7, PPA1, DHX33, RPLP0, RPLP2, GCN1, RPS12, USP16, RPS19, EIF3G, PUS7, ILF3, RPL21, NOLC1, CDC123, RACK1, BTG2, RPL17, RPS29, RPL29, PASK, DAP3, GTPB…	Improvers	Shared
GO_POSTTRANSCRIPTIONAL_REGULATION_OF_GENE_EXPRESSION	1e-10	2.3e-08	NA	-0.460873	-1.97468	373	ZFP36, CAV1, PSMC3, IL6, PSME2, PSMD14, ITGA2, PSMD7, PSMD4, APEX1, PSMB7, PSMD3, EIF5A, MIR22HG, RPS9, PSMB3, NUP107, PSMB6, EIF3B, JMJD4, MPV17L2, EIF4G1, BCL3, PSMC5, PSMB5, RAN, EXOSC2, EIF6, DKC1, RPL10, FUS, GSPT1, EIF4A3, NUP205, SRRT, EIF2S1, EIF4EBP1, PSMC2, HSPB1, GAPDH, EXOSC4, TCOF1, NCL, THBS1, NUP35, EIF5B, NUP188, RPS27A, XPO5, NUP93, MIR17HG, GCN1, PSMD6, EXOSC8, USP16, MYD88, PUS…	Improvers	Shared
GO_RIBONUCLEOPROTEIN_COMPLEX_BIOGENESIS	1e-10	2.3e-08	NA	-0.604828	-2.51746	284	BMS1, HEATR1, SNRPB, PDCD11, GTPBP4, RPL35, RPS9, PRMT5, EIF3B, DDX54, MPV17L2, RRP9, NOP58, DCAF13, RPS5, PES1, RAN, DDX23, EXOSC2, EIF6, DKC1, RPL10, NHP2, DHX37, NOC4L, NIP7, SNRPD1, EIF4A3, WDR3, RUVBL2, DIMT1, MAK16, NOL8, UTP6, NOP14, NOL10, FAM207A, TSR1, WDR74, GEMIN4, EXOSC4, RPL27, RPS21, LSM4, SNRPD2, LTV1, RPS7, RPLP0, PAK1IP1, SF3A3, WDR77, EXOSC8, RPS19, PRPF3, EIF3G, UTP11, NOLC1, …	Improvers	Shared
GO_RIBOSOME_BIOGENESIS	1e-10	2.3e-08	NA	-0.650405	-2.57466	186	BMS1, HEATR1, PDCD11, GTPBP4, RPL35, RPS9, DDX54, MPV17L2, RRP9, NOP58, DCAF13, RPS5, PES1, RAN, EXOSC2, EIF6, DKC1, RPL10, NHP2, DHX37, NOC4L, NIP7, EIF4A3, WDR3, DIMT1, MAK16, NOL8, UTP6, NOP14, NOL10, FAM207A, TSR1, WDR74, GEMIN4, EXOSC4, RPL27, RPS21, LTV1, RPS7, RPLP0, PAK1IP1, EXOSC8, RPS19, UTP11, NOLC1, NOC2L, DDX56, POP7, UTP14A, PWP1, KRI1, BRIX1, ABT1, SART1, NOP56, UTP4, EFL1, RPL12, …	Improvers	Shared
GO_RNA_CATABOLIC_PROCESS	1e-10	2.3e-08	NA	-0.556436	-2.2894	251	ZFP36, PSMC3, PSME2, FEN1, PSMD14, POP1, PSMD7, PSMD4, APEX1, PSMB7, PSMD3, PKP1, RPL35, RPS9, PSMB3, PSMB6, RPL41, EIF4G1, PSMC5, PSMB5, RPS5, PNRC2, EXOSC2, DKC1, RPL10, FUS, GSPT1, EIF4A3, PSMC2, HSPB1, EXOSC4, RPL27, RPS21, LSM4, SND1, RPL28, PELO, RPS27A, RPS7, DIS3L2, RPLP0, RPLP2, RPS12, PSMD6, EXOSC8, RPS19, MYD88, ZPR1, RPL21, BTG2, NSUN2, RPL17, RPS29, TBRG4, RPL29, GTPBP1, ROCK2, RPS4Y…	Improvers	Shared
GO_RRNA_METABOLIC_PROCESS	1e-10	2.3e-08	NA	-0.661715	-2.55145	148	BMS1, HEATR1, PDCD11, GTPBP4, RPL35, RPS9, DDX54, RRP9, NOP58, DCAF13, PES1, EXOSC2, EIF6, DKC1, NHP2, DHX37, NOC4L, EIF4A3, WDR3, DIMT1, MAK16, NOL8, UTP6, NOP14, NOL10, FAM207A, TSR1, WDR74, GEMIN4, EXOSC4, RPL27, RPS21, PELO, RPS7, EXOSC8, RPS19, UTP11, NOLC1, DDX56, POP7, UTP14A, KRI1, ABT1, SART1, NOP56, UTP4, NAT10, METTL16, LSM6, RPF2, RPS15, RRP7A, IMP4, NGDN, WDR12, FP565260.1, NSUN5, PW…	Improvers	Shared
GO_TRANSLATIONAL_INITIATION	1e-10	2.3e-08	NA	-0.614591	-2.32701	121	RPL35, RPS9, RPL41, EIF3B, EIF4G1, RPS5, EIF2B3, EIF6, RPL10, EIF2S1, EIF4EBP1, HSPB1, RPL27, RPS21, RPL28, EIF5B, RPS27A, RPS7, DHX33, RPLP0, RPLP2, RPS12, RPS19, EIF3G, RPL21, CDC123, RPL17, RPS29, RPL29, RPS4Y1, RPL9, RPL37A, EIF3D, RPL12, RPS15, RPL13, EIF3K, RPL39, RPL36, POLR2G, RPL24, RPS14, EIF4A1, RPS3, RPL7, RPS11, EIF5, RPL11, RPL30, KHDRBS1, UBA52, TNF, RPS4X, RPS13, RPS26, RPL7A, EIF…	Improvers	Shared
GO_VIRAL_GENE_EXPRESSION	1.04343e-10	2.3e-08	0.839089	-0.593677	-2.26102	128	ZFP36, PSMC3, NELFE, RPL35, RPS9, NUP107, RPL41, EIF3B, RPS5, RPL10, NUP205, RPL27, RPS21, TRIM27, NUP35, RPL28, NUP188, RPS27A, RPS7, NUP93, RPLP0, RPLP2, RPS12, NELFCD, RPS19, EIF3G, RPL21, RPL17, RPS29, RPL29, RPS4Y1, RPL9, RPL37A, EIF3D, RPL12, RPS15, RPL13, RPL39, INPP5K, RPL36, POLR2G, RPL24, GTF2F1, RPS14, RPS3, RPL7, DHX9, RPS11, PTBP1, RPL11, RPL30, NUP37, UBA52, RPS4X, NUP62, SSB, GTF2F…	Improvers	Shared
GO_COTRANSLATIONAL_PROTEIN_TARGETING_TO_MEMBRANE	1.70623e-10	3.51598e-08	0.826657	-0.733615	-2.40135	55	RPL35, RPS9, RPL41, RPS5, RPL10, SSR3, RPL27, RPS21, RPL28, RPS27A, RPS7, RPLP0, RPLP2, RPS12, RPS19, RPL21, RPL17, RPS29, RPL29, RPS4Y1, RPL9, RPL37A, RPL12, RPS15, RPL13, RPL39, RPL36, RPL24, RPS14, RPS3, RPL7, RPS11, RPL11, RPL30, UBA52, RPS4X, RPS13, RPS26, RPL7A, RPS16, RPL14, RPL6, RPL31, RPS25	Improvers	Shared
GO_ESTABLISHMENT_OF_PROTEIN_LOCALIZATION_TO_ENDOPLASMIC_RETICULUM	2.208e-10	4.26559e-08	0.826657	-0.705731	-2.39826	64	RPL35, RPS9, RPL41, RPS5, RPL10, SSR3, RPL27, RPS21, RPL28, RPS27A, RPS7, RPLP0, RPLP2, RPS12, RPS19, RPL21, RPL17, RPS29, RPL29, SRPRB, RPS4Y1, RPL9, RPL37A, RPL12, RPS15, RPL13, RPL39, RPL36, RPL24, RPS14, RPS3, SGTA, RPL7, RPS11, RPL11, RPL30, UBA52, RPS4X, HSPA5, RPS13, RPS26, RPL7A, RPS16, RPL14, RPL6, RPL31, RPS25	Improvers	Shared
GO_REGULATION_OF_INFLAMMATORY_RESPONSE	2.97233e-10	5.4e-08	0.814036	-0.519252	-2.06574	192	CALCRL, TEK, SOCS3, IL1RL1, CCR7, SERPINE1, TSLP, IL1B, GPR4, EDNRB, HGF, SEMA7A, LRFN5, NLRC3, IL6, INS, ETS1, PPARD, S100A8, IL1R2, FOXF1, SELE, NFKBIA, IL17RB, TNFAIP3, TNFRSF1A, IL33, SBNO2, ITGA2, NT5E, NLRP1, SPHK1, IL1R1, TNFRSF11A, TYRO3, IDO1, CDH5, OSMR, TGM2, STAT5B, LPL, ZYX, CEBPB, RPS19, MYD88, NR1D1, GHRL, PTPN2, F12, BRD4, BIRC3, TNIP1	Improvers	Unique
GO_INTERLEUKIN_1_MEDIATED_SIGNALING_PATHWAY	3.18964e-10	5.47732e-08	0.814036	-0.688812	-2.35861	66	IL1B, PSMC3, IL6, IL1R2, NFKBIA, PSME2, PSMD14, IL1RN, PSMD7, PSMD4, PSMB7, PSMD3, PSMB3, PSMB6, IL1R1, PSMC5, PSMB5, PSMC2, RPS27A, PSMD6, MYD88, IRAK1, RPS6KA4, IKBKG, RBX1, NFKB1, UBE2N, RELA, UBC, IRAK3, UBA52, OTUD4	Improvers	Shared
GO_RIBOSOMAL_SMALL_SUBUNIT_BIOGENESIS	4.87799e-10	7.93572e-08	0.801216	-0.759732	-2.4055	44	BMS1, HEATR1, DCAF13, RPS5, DHX37, WDR3, UTP6, NOP14, NOL10, FAM207A, TSR1, RPS21, LTV1, RPS7, RPS19, KRI1, ABT1, UTP4, NAT10, LSM6, RPS15, RRP7A, NGDN, FP565260.1, PWP2, RPS14, UTP3, XRCC5, MRPS7, RPP40	Improvers	Shared
GO_RIBONUCLEOPROTEIN_COMPLEX_SUBUNIT_ORGANIZATION	1.40727e-09	2.17493e-07	0.788187	-0.561073	-2.14345	133	SNRPB, PRMT5, EIF3B, RPS5, DDX23, EIF6, RPL10, SNRPD1, RUVBL2, GEMIN4, LSM4, SNRPD2, RPLP0, SF3A3, WDR77, RPS19, PRPF3, EIF3G, PRPF8, TGS1, BRIX1, ABT1, SART1, PRPF31, EIF3D, RPL12, RPF2, RPS15, RRP7A, EIF3K, SNRPC, DYRK3, FP565260.1, RPL24, PWP2, RPS14, CD2BP2, PRPF6, DHX9, XRCC5, MRPS7, EIF5, RPL11, ATR, DHX8, CPSF6, ERAL1, GEMIN5, SRPK1, EIF4H, MRPL11, ADAR, RPL6, STRAP, TXNL4A, EIF3A, USP39, …	Improvers	Shared
GO_VASCULATURE_DEVELOPMENT	1.7157e-09	2.52535e-07	0.788187	-0.416749	-1.80058	411	FGF2, CALCRL, TEK, SOCS3, NRP2, SERPINE1, LIF, ADGRF5, FOSL1, IL1B, S1PR1, GPR4, PTPRB, HGF, CAV1, JUNB, FGFBP1, ADAMTS9, ACVRL1, ENG, PRDM1, IL6, KDR, ETS1, FOXS1, FOXF1, TIE1, ITGA5, MYDGF, TMEM204, TNFAIP3, RGCC, ELK3, APLNR, TNFRSF12A, ROBO4, MYH9, PDGFB, SPHK1, ANGPT2, CLEC14A, SMAD6, ID1, TBX2, DNMT1, TBX3, ANGPTL2, CDH5, EPHA2, FMNL3, ACTA2, ANXA3, PTPN14, ANXA2, ESM1, FLT1, HSPB1, PDPN, N…	Improvers	Shared
GO_ORGANIC_CYCLIC_COMPOUND_CATABOLIC_PROCESS	2e-09	2.72227e-07	0.774939	-0.430148	-1.84157	374	PNP, ZFP36, PSMC3, IL6, PDE4B, PSME2, FEN1, PSMD14, NT5E, POP1, PSMD7, PSMD4, APEX1, PSMB7, PSMD3, PKP1, RPL35, RPS9, PSMB3, PSMB6, RPL41, EIF4G1, PSMC5, PSMB5, RPS5, PNRC2, IDO1, EXOSC2, DKC1, RPL10, FUS, GSPT1, EIF4A3, PSMC2, HSPB1, EXOSC4, RPL27, RPS21, LSM4, SND1, RPL28, PELO, RPS27A, RPS7, DIS3L2, RPLP0, RPLP2, RPS12, PSMD6, EXOSC8, ITPA, RPS19, MYD88, KPNA1, ZPR1, RPL21, BTG2, APOBEC2, NSUN…	Improvers	Shared
GO_DNA_REPAIR	2.06248e-09	2.72227e-07	0.774939	-0.431567	-1.83018	336	HMGA1, FEN1, PSMD14, APEX1, MCM5, CETN2, WRAP53, ERCC1, DTX3L, MCM4, SSRP1, FUS, RUVBL2, XRCC3, PARP1, UFD1, COPS6, ISG15, ALKBH2, SMC1A, RPS27A, XRCC6, COPS3, CDC7, INO80, POLD2, RPA2, BTG2, CENPX, POLA1, CCNH, BCCIP, ASCC3, ACTL6A, CDK2, POLD1, ALKBH3, MSH2, RFC4, DDB1, NABP1, UIMC1, INO80C, UHRF1, MCRS1, HUWE1, RBX1, WDHD1, SMC5, NABP2, NPLOC4, ATRIP, POLR2G, UBE2N, RBBP8, RPS3, GTF2H2, MORF4L…	Improvers	Shared
GO_DNA_BIOSYNTHETIC_PROCESS	2.1137e-09	2.72227e-07	0.774939	-0.587401	-2.20697	113	FGF2, HGF, ACVRL1, MYC, RGCC, CDKN1A, STN1, PDGFB, SPHK1, HNRNPA1, WRAP53, DKC1, NHP2, UFD1, ISG15, RPS27A, POLD2, RPA2, POLA1, POLD1, CCT2, RFC4, NAT10, CCT6A, CCT7, PTK2B, NPLOC4, DNAJC2, CCT3, ANKRD1, CHTF18, XRCC5, SMG6, UBC, MAD2L2, ATR, UBA52, WRN, PAK3, USP10, TELO2, POLE4, HNRNPD, RFC3	Improvers	Shared
GO_RESPONSE_TO_INTERLEUKIN_1	2.60549e-09	3.22143e-07	0.774939	-0.565502	-2.15186	123	AKAP12, IL1B, PSMC3, IL6, ETS1, IL1R2, SELE, NFKBIA, PSME2, CCL7, PSMD14, IL1RN, PSMD7, PSMD4, PSMB7, PSMD3, PSMB3, PSMB6, IL1R1, PSMC5, PSMB5, TNFRSF11A, CCL22, PSMC2, ABCC2, SFRP1, RPS27A, CEBPB, PSMD6, FGB, MYD88, IRAK1, NR1D1, RPS6KA4, IKBKG, RBX1, NFKB1, KMO, UBE2N, ANKRD1, RELA, CCL2, ZC3H12A, UBC, IRAK3, UBA52, OTUD4, ADAMTS7, USP10, CCL17	Improvers	Shared
GO_MATURATION_OF_SSU_RRNA	6.33251e-09	7.52838e-07	0.761461	-0.796095	-2.35178	31	BMS1, HEATR1, DCAF13, DHX37, WDR3, UTP6, NOP14, NOL10, FAM207A, TSR1, RPS21, RPS19, KRI1, ABT1, UTP4, NAT10, LSM6, NGDN, FP565260.1, PWP2, RPS14, UTP3, RPP40	Improvers	Shared
GO_MATURATION_OF_SSU_RRNA_FROM_TRICISTRONIC_RRNA_TRANSCRIPT_SSU_RRNA_5_8S_RRNA_LSU_RRNA	6.85036e-09	7.84239e-07	0.761461	-0.83607	-2.33762	24	BMS1, HEATR1, DCAF13, DHX37, UTP6, NOP14, NOL10, FAM207A, TSR1, RPS21, RPS19, KRI1, ABT1, UTP4, NGDN, FP565260.1, PWP2, RPS14, UTP3, RPP40	Improvers	Shared
GO_REGULATION_OF_DEFENSE_RESPONSE	1.15443e-08	1.2744e-06	0.74774	-0.414941	-1.77349	365	CALCRL, TEK, SOCS3, IL1RL1, CCR7, SERPINE1, TSLP, IL1B, GPR4, EDNRB, HGF, PSMC3, SEMA7A, LRFN5, NLRC3, IL6, INS, ETS1, PPARD, S100A8, IL1R2, FOXF1, SELE, NFKBIA, IL17RB, TNFAIP3, PSME2, TNFRSF1A, RELB, IL33, SBNO2, PSMD14, ITGA2, NT5E, PSMD7, PSMD4, PSMB7, NLRP1, PSMD3, SPHK1, COCH, PSMB3, PSMB6, IL1R1, PSMC5, PSMB5, TNFRSF11A, DTX3L, TYRO3, IDO1, CDH5, OSMR, TGM2, NLRC5, UFD1, PSMC2, STAT5B, LPL…	Improvers	Shared
GO_TELOMERE_ORGANIZATION	1.2e-08	1.27513e-06	0.74774	-0.612977	-2.19524	85	MYC, GNL3, FEN1, APEX1, STN1, HNRNPA1, WRAP53, ERCC1, DKC1, NHP2, XRCC3, PARP1, XRCC6, POLD2, RPA2, POLA1, POLA2, POLD1, CCT2, RFC4, NAT10, CCT6A, CCT7, SMC5, NABP2, CCT3, XRCC5, SMG6, ATR, HDAC8, WRN, TELO2, POLE4, HNRNPD, RFC3, NBN, HNRNPA2B1	Improvers	Shared
GO_RNA_LOCALIZATION	1.46144e-08	1.50577e-06	0.74774	-0.524416	-2.03124	150	ZFP36, EIF5A, ALYREF, HNRNPA1, CETN2, NUP107, WRAP53, NOP58, RAN, EXOSC2, EIF6, DKC1, NHP2, EIF4A3, NUP205, RUVBL2, SRSF7, SRSF2, NUP35, LTV1, NUP188, XPO5, NUTF2, NUP93, NXT1, NSUN2, CCT2, THOC6, DHX38, CCT6A, TGFBR2, RPS15, CCT7, RBM15B, CCT3, PRPF6, DHX9, MAGOHB, SMG6, ZFP36L1, RBM8A, SRSF4, MVP, THOC5, ATR, KHDRBS1, NUP37, RFTN1, NUP62, NUP62CL, CPSF6, U2AF2, MX2, SSB, YBX1	Improvers	Shared
GO_PROTEIN_LOCALIZATION_TO_ENDOPLASMIC_RETICULUM	1.7e-08	1.697e-06	0.733762	-0.619396	-2.19486	80	RPL35, RPS9, RPL41, RPS5, RPL10, SSR3, RPL27, RPS21, RPL28, RPS27A, RPS7, RPLP0, RPLP2, GBF1, RPS12, RPS19, RPL21, RPL17, RPS29, RPL29, SRPRB, RPS4Y1, RPL9, RPL37A, RPL12, RPS15, RPL13, RPL39, RPL36, RPL24, RPS14, RPS3, SGTA, RPL7, RPS11, RPL11, RPL30, UBA52, RPS4X, HSPA5, RPS13, RPS26, RPL7A, RPS16, RPL14, RPL6, RPL31, RPS25	Improvers	Shared
GO_ANTIGEN_PROCESSING_AND_PRESENTATION_OF_PEPTIDE_ANTIGEN_VIA_MHC_CLASS_I	1.76428e-08	1.70419e-06	0.733762	-0.698403	-2.25848	52	PSMC3, PSME2, PSMD14, PSMD7, PSMD4, PSMB7, PSMD3, PSMB3, SEC24D, PSMB6, PSMC5, PSMB5, TAP2, PSMC2, PSMD6, IKBKG, TAP1, AZGP1	Improvers	Shared
GO_ESTABLISHMENT_OF_PROTEIN_LOCALIZATION_TO_ORGANELLE	2.38791e-08	2.23668e-06	0.733762	-0.412694	-1.76297	359	KPNA7, SFN, LAMP3, AGXT, NFKBIA, PKIG, TNFAIP3, CDKN1A, PDCD5, RPL35, RPS9, LMNA, NUP107, RPL41, WRAP53, ACOX3, RPS5, RAN, DKC1, TOMM40, RPL10, RUVBL2, PITRM1, SSR3, RPL27, RPS21, SLC27A2, BAG3, EFNB2, NUP35, RPL28, NUP188, RPS27A, RPS7, NUTF2, NUP93, RPLP0, CDH1, NXT1, RPLP2, RPS12, TIMM23, PEX5, RPS19, KPNA1, LRWD1, ZPR1, RPL21, NOLC1, RPL17, RPS29, ROMO1, RPL29, MX1, SRPRB, CCT2, RPS4Y1, RPL9,…	Improvers	Shared
GO_RIBOSOMAL_LARGE_SUBUNIT_BIOGENESIS	2.62459e-08	2.33712e-06	0.733762	-0.725917	-2.29534	43	GTPBP4, RPL35, PES1, EIF6, RPL10, NHP2, NIP7, MAK16, WDR74, RPLP0, PAK1IP1, NOC2L, BRIX1, RPL12, ZNF622, RPF2, WDR12, RPL24, RPL7, RSL1D1, RPF1, LAS1L, RPL11, RPL7A, MRPL11, DDX18, RPL14, RPL6	Improvers	Shared
GO_DNA_REPLICATION	2.64637e-08	2.33712e-06	0.733762	-0.503312	-1.96979	167	ACVRL1, HMGA1, FEN1, GRWD1, STN1, MCM5, ALYREF, GTPBP4, MCM4, SSRP1, GLI2, TWNK, S100A11, CDC34, CDC7, INO80, POLD2, RPA2, STOML2, LRWD1, ZPR1, CENPX, POLA1, POLA2, CDC6, CDK2, POLD1, NFIC, BAZ1A, TIPIN, RFC4, ORC3, HRAS, SDE2, WDHD1, DNAJC2, ATRIP, SIN3A, RBBP8, CHTF18, DHX9, MCMBP, CLSPN, FAF1, FANCM, ATR, BCAR3, CHAF1A, WRN, RRM1, CINP, POLE4, RBMS1, SUPT16H, RFC3, MCM2, RECQL	Improvers	Shared
GO_POSITIVE_REGULATION_OF_DEFENSE_RESPONSE	5.95213e-08	4.9903e-06	0.719513	-0.483714	-1.91198	185	IL1RL1, CCR7, SERPINE1, TSLP, IL1B, GPR4, PSMC3, IL6, ETS1, S100A8, NFKBIA, IL17RB, PSME2, TNFRSF1A, RELB, IL33, PSMD14, ITGA2, PSMD7, PSMD4, PSMB7, PSMD3, COCH, PSMB3, PSMB6, PSMC5, PSMB5, TNFRSF11A, IDO1, OSMR, TGM2, NLRC5, PSMC2, STAT5B, LPL, XRCC6, MEF2C, CEBPB, PSMD6, RPS19, MYD88, POLR3D, F12, IKBKG, PQBP1, TNIP1, IRF7, HRAS, NFKB1, GPRC5B, SIN3A, RELA, C2CD4A, DHX9, XRCC5, POLR3F, FADD, DD…	Improvers	Unique
GO_ANTIGEN_PROCESSING_AND_PRESENTATION_OF_EXOGENOUS_PEPTIDE_ANTIGEN_VIA_MHC_CLASS_I	5.97351e-08	4.9903e-06	0.704976	-0.732838	-2.26248	39	PSMC3, PSME2, PSMD14, PSMD7, PSMD4, PSMB7, PSMD3, PSMB3, PSMB6, PSMC5, PSMB5, TAP2, PSMC2, PSMD6, IKBKG, TAP1	Improvers	Shared
GO_MRNA_PROCESSING	6.34203e-08	5.15874e-06	0.704976	-0.413331	-1.75492	339	NELFE, SNRPB, ALYREF, HNRNPA1, PDCD11, PRMT5, DAZAP1, DDX23, DDX46, FUS, SNRPD1, EIF4A3, SRRT, SNRPA1, SRSF7, SF3B3, SRSF2, SNRPA, GEMIN4, EFTUD2, NCL, LSM4, SNRPD2, SF3A3, WDR77, PRPF3, DHX15, ZPR1, TRA2A, APOBEC2, PRPF8, TBRG4, CCNH, TGS1, AURKAIP1, SART1, PQBP1, THOC6, DHX38, CTNNBL1, PRPF31, SLTM, TCERG1, RBM28, METTL16, TSEN54, GPKOW, LSM6, SF3B2, CIRBP, SNRPC, HNRNPF, RBM15B, POLR2G, GTF2F1…	Improvers	Shared
GO_NUCLEAR_TRANSPORT	7.18402e-08	5.6938e-06	0.704976	-0.464684	-1.88508	224	KPNA7, IL1B, SFN, NFKBIA, PKIG, HMGA1, CDKN1A, SNRPB, EIF5A, ALYREF, HNRNPA1, LMNA, NUP107, RAN, EIF6, SNRPD1, EIF4A3, NUP205, PTPN14, SRSF7, SRSF2, GEMIN4, BAG3, NUP35, SNRPD2, LTV1, NUP188, XPO5, NUTF2, NUP93, CDH1, NXT1, KPNA1, ZPR1, NOLC1, NSUN2, EMD, THOC6, DHX38, TXN, RANGAP1, RPS15, PHB2, RBM15B, RITA1, AKT1, DHX9, MAGOHB, SMG6, TRIM28, RBM8A, SRSF4, ZC3H12A, THOC5, KHDRBS1, NUP37, STAT3, …	Improvers	Shared
GO_POSITIVE_REGULATION_OF_RESPONSE_TO_EXTERNAL_STIMULUS	7.67756e-08	5.93283e-06	0.704976	-0.439039	-1.81894	267	FGF2, THBD, IL1RL1, CCR7, SERPINE1, TSLP, IL1B, S1PR1, BMP6, GPR4, PSMC3, IL6, KDR, ETS1, S100A8, NFKBIA, IL17RB, PSME2, TNFRSF1A, CCL7, RELB, IL33, PSMD14, ITGA2, PSMD7, PSMD4, PSMB7, PSMD3, PDGFB, COCH, PSMB3, PSMB6, PSMC5, PSMB5, TNFRSF11A, IDO1, NPY, OSMR, TGM2, NLRC5, PSMC2, HSPB1, THBS1, STAT5B, LPL, CXCR4, XRCC6, CEBPB, PSMD6, RPS19, MYD88, GHRL, POLR3D, F12, IKBKG, ANO6, PQBP1, TNIP1, IRF…	Improvers	Shared
GO_RNA_SPLICING_VIA_TRANSESTERIFICATION_REACTIONS	1.46151e-07	1.10183e-05	0.690132	-0.45032	-1.83791	240	SNRPB, ALYREF, HNRNPA1, PRMT5, DAZAP1, DDX23, DDX46, FUS, SNRPD1, EIF4A3, SRRT, SNRPA1, SRSF7, SF3B3, SRSF2, SNRPA, GEMIN4, EFTUD2, NCL, LSM4, SNRPD2, SF3A3, WDR77, PRPF3, DHX15, TRA2A, PRPF8, TGS1, SART1, PQBP1, DHX38, CTNNBL1, PRPF31, METTL16, GPKOW, LSM6, SF3B2, CIRBP, SNRPC, HNRNPF, RBM15B, POLR2G, GTF2F1, CD2BP2, SYNCRIP, PRPF6, DHX9, MAGOHB, PTBP1, RBM8A, SRSF4, KHDRBS1, DHX8, U2AF2, GTF2F2…	Improvers	Shared
GO_REGULATION_OF_HEMATOPOIETIC_STEM_CELL_DIFFERENTIATION	1.63499e-07	1.20327e-05	0.690132	-0.735168	-2.25432	36	PSMC3, PSME2, PSMD14, PSMD7, PSMD4, PSMB7, PSMD3, PSMB3, PSMB6, PSMC5, PSMB5, PSMC2, PSMD6, RUNX1, PUS7	Improvers	Shared
GO_BLOOD_VESSEL_MORPHOGENESIS	2.38888e-07	1.71722e-05	0.674963	-0.407245	-1.72773	334	FGF2, CALCRL, TEK, NRP2, SERPINE1, ADGRF5, IL1B, S1PR1, GPR4, PTPRB, HGF, CAV1, JUNB, FGFBP1, ADAMTS9, ACVRL1, ENG, PRDM1, IL6, KDR, ETS1, FOXF1, TIE1, ITGA5, MYDGF, TNFAIP3, RGCC, ELK3, APLNR, TNFRSF12A, ROBO4, MYH9, SPHK1, ANGPT2, CLEC14A, ID1, TBX2, ANGPTL2, CDH5, EPHA2, FMNL3, ANXA3, ANXA2, ESM1, FLT1, HSPB1, NCL, THBS1, JCAD, EFNB2, EPAS1, SFRP1, CXCR4, EMILIN1, ADGRB3, SMAD7, SPRY2, RUNX1, …	Improvers	Shared
GO_HEMATOPOIETIC_STEM_CELL_DIFFERENTIATION	2.8034e-07	1.96939e-05	0.674963	-0.695042	-2.19918	42	PSMC3, PSME2, PSMD14, PSMD7, PSMD4, PSMB7, PSMD3, PSMB3, PSMB6, PSMC5, PSMB5, PSMC2, SFRP1, PSMD6, RUNX1, PUS7, HOXB4, XRCC5, ABL1, LMO1	Improvers	Shared
GO_TISSUE_MORPHOGENESIS	3.67941e-07	2.52734e-05	0.674963	-0.394141	-1.68531	357	FGF2, SOCS3, NRP2, LIF, S1PR1, HGF, PSMC3, SNAI1, ACVRL1, ENG, KDR, MYC, HBEGF, VCL, FOXF1, SNAI2, ITGA5, STC1, PSME2, PODXL, LAMA3, PSMD14, ITGA2, PSMD7, PSMD4, PSMB7, PSMD3, PSMB3, PSMB6, TBX2, ACTB, PSMC5, PSMB5, TBX3, PFN1, EPHA2, ACTA2, TGM2, INHBA, GLI2, ILK, BMP2, PSMC2, PDPN, WDR1, NDRG4, EFNB2, SFRP1, CXCR4, RPS7, MICAL2, MEF2C, SMAD7, PSMD6, SPRY2, NRG1, SEMA3C, TMEM100, AP2M1, TXNRD1, …	Improvers	Shared
GO_CELL_JUNCTION_ASSEMBLY	3.9828e-07	2.67627e-05	0.674963	-0.430938	-1.77311	259	TEK, IL1B, OXTR, CAV1, GAP43, SNAI1, CLDN14, ACVRL1, LRFN5, FLNC, KDR, VCL, SNAI2, ITGA5, LAMA3, FERMT2, PCDHB13, ITGA2, ARHGAP6, SPOCK2, PKP1, EIF4G1, ACTB, CDH5, EPHA2, DST, ILK, WDR1, THBS1, EFNB2, SFRP1, PCDHB10, CDH1, ADGRB3, MEF2C, SMAD7, COL17A1, PCDHB16, RUNX1, RAPGEF2, NRG1, PCDHB3, PCDHB14, PCDHB5, GHRL, ASIC2, ROCK2, MAP4K4, MPP5, CDH19, ITGA6, PARD3, PKP3, SPTBN2, PTK2B, GJC1, CDH11, …	Improvers	Unique
GO_TUBE_MORPHOGENESIS	7.44336e-07	4.79322e-05	0.659444	-0.367741	-1.60155	473	FGF2, CALCRL, TEK, NRP2, SERPINE1, ADGRF5, IL1B, S1PR1, GPR4, PTPRB, HGF, CAV1, JUNB, FGFBP1, ADAMTS9, ACVRL1, ENG, PRDM1, IL6, KDR, MYC, ETS1, NKX2-3, FOXF1, TIE1, ITGA5, MYDGF, TNFAIP3, RGCC, ELK3, APLNR, PODXL, TNFRSF12A, ROBO4, MYH9, SPHK1, ANGPT2, CLEC14A, ID1, TBX2, TBX3, ANGPTL2, PFN1, CDH5, EPHA2, FMNL3, TGM2, ANXA3, GLI2, ANXA2, ILK, ESM1, BMP2, FLT1, HSPB1, PDPN, NDRG4, NCL, THBS1, JCAD…	Improvers	Shared
GO_NUCLEAR_EXPORT	8.59318e-07	5.42072e-05	0.659444	-0.518133	-1.97331	128	IL1B, SFN, EIF5A, ALYREF, HNRNPA1, NUP107, RAN, EIF6, EIF4A3, NUP205, PTPN14, SRSF7, SRSF2, BAG3, NUP35, LTV1, NUP188, XPO5, NUTF2, NUP93, NXT1, NSUN2, EMD, THOC6, DHX38, TXN, RANGAP1, RPS15, RBM15B, RITA1, DHX9, MAGOHB, SMG6, RBM8A, SRSF4, THOC5, KHDRBS1, NUP37, NUP62, NUP62CL, CPSF6, U2AF2, YWHAE, SSB, DESI1, IWS1, HNRNPA2B1, CPSF3, MAGOH, HSPA9, POLDIP3, POM121, TP53, SUPT6H, ANP32B, CASC3, NU…	Improvers	Shared
GO_NUCLEIC_ACID_PHOSPHODIESTER_BOND_HYDROLYSIS	9.44098e-07	5.83642e-05	0.659444	-0.470699	-1.85224	174	ZFP36, IL6, FEN1, POP1, BMS1, APEX1, ERCC1, PNRC2, EXOSC2, NHP2, PARP1, NOP14, TSR1, EXOSC4, RPS21, SND1, PELO, RPS27A, DIS3L2, EXOSC8, POLD2, RPA2, KPNA1, N4BP2, TOE1, POP7, ELAC2, KRI1, ABT1, ENPP1, POLD1, AZGP1, RFC4, DDB1, RBX1, DGCR8, RBBP8, GTF2H2, ISG20, ERI1, SMG6, RPP40, LAS1L, XRN2, GTF2H3, TRIR, ZC3H12A, UBC, FANCM, UBA52, WRN, CPSF6, TATDN1, RFC3, POP5, CNOT1, DCPS, KPNB1, CPSF3, ERCC…	Improvers	Shared
GO_POSITIVE_REGULATION_OF_INFLAMMATORY_RESPONSE	9.94e-07	6.02469e-05	0.643552	-0.587801	-2.05983	76	IL1RL1, CCR7, SERPINE1, TSLP, IL1B, GPR4, IL6, ETS1, S100A8, NFKBIA, IL17RB, TNFRSF1A, IL33, ITGA2, TNFRSF11A, IDO1, OSMR, TGM2, STAT5B, LPL, CEBPB, RPS19, MYD88, F12	Improvers	Unique
GO_REGULATION_OF_DNA_METABOLIC_PROCESS	1.04775e-06	6.22805e-05	0.643552	-0.455632	-1.81598	195	FGF2, HGF, ACVRL1, IL6, MYC, GNL3, RGCC, CLCF1, CDKN1A, STN1, PDGFB, ALYREF, HNRNPA1, PRMT5, WRAP53, ERCC1, DTX3L, DKC1, FUS, ANXA3, PARP1, RPA2, IL7R, KPNA1, CDK2, CCT2, MSH2, RFC4, NAT10, CCT6A, UIMC1, CCT7, PTK2B, NABP2, DNAJC2, CCT3, UBE2N, ANKRD1, RPS3, CHTF18, AKT1, DHX9, XRCC5, SMG6, TRIM28, PRRX1, MAD2L2, ATR, HDAC8, WRN, OTUD4, MBD2, PAK3, MLH1, HNRNPD, RFC3, KDM1B, SLF1, NBN, ARID2	Improvers	Unique
GO_REGULATION_OF_DNA_BIOSYNTHETIC_PROCESS	1.36881e-06	7.98303e-05	0.643552	-0.611368	-2.08987	65	FGF2, HGF, ACVRL1, MYC, RGCC, CDKN1A, STN1, PDGFB, HNRNPA1, WRAP53, DKC1, CCT2, RFC4, NAT10, CCT6A, CCT7, PTK2B, DNAJC2, CCT3, ANKRD1, CHTF18, XRCC5, SMG6, ATR, PAK3, HNRNPD, RFC3	Improvers	Unique
GO_REGULATION_OF_STEM_CELL_DIFFERENTIATION	1.48851e-06	8.52036e-05	0.643552	-0.624146	-2.09174	59	PSMC3, PSME2, PSMD14, PSMD7, PSMD4, PSMB7, PSMD3, PSMB3, PSMB6, PSMC5, PSMB5, PSMC2, PSMD6, RUNX1, PUS7, NSUN2, PWP1, SEMA3C, HOXB4, NOTCH1, STAT3, ABL1, LMO1, PDGFRA, TACSTD2, SETD1A	Improvers	Shared
GO_DNA_DEPENDENT_DNA_REPLICATION	1.59587e-06	8.87862e-05	0.643552	-0.553248	-1.99395	89	HMGA1, FEN1, MCM5, ALYREF, MCM4, TWNK, CDC34, CDC7, INO80, POLD2, RPA2, STOML2, LRWD1, ZPR1, CENPX, POLA1, POLA2, CDC6, CDK2, POLD1, BAZ1A, TIPIN, RFC4, ORC3, WDHD1, CHTF18, MCMBP, FANCM, WRN, POLE4, RFC3, MCM2, RECQL, NBN	Improvers	Shared
GO_ANAPHASE_PROMOTING_COMPLEX_DEPENDENT_CATABOLIC_PROCESS	1.60855e-06	8.87862e-05	0.643552	-0.667772	-2.15277	47	PSMC3, PSME2, PSMD14, PSMD7, PSMD4, PSMB7, PSMD3, PSMB3, PSMB6, PSMC5, PSMB5, PSMC2, RPS27A, PSMD6, CDK2, ANAPC1, UBC, UBA52	Improvers	Shared
GO_REGULATION_OF_MRNA_METABOLIC_PROCESS	1.81148e-06	9.7541e-05	0.643552	-0.4384	-1.76122	206	ZFP36, PSMC3, PSME2, PSMD14, NELFE, PSMD7, PSMD4, APEX1, PSMB7, PSMD3, HNRNPA1, PKP1, PSMB3, PSMB6, EIF4G1, DAZAP1, PSMC5, PSMB5, EXOSC2, FUS, SRSF7, PSMC2, SRSF2, HSPB1, SNRPA, EXOSC4, NCL, RPS27A, PSMD6, EXOSC8, MYD88, TRA2A, BTG2, TBRG4, GTPBP1, ROCK2, SLTM, PKP3, METTL16, CIRBP, RBM15B, POLR2G, DHX34, SYNCRIP, AKT1, DHX9, SAFB, ZFP36L1, PTBP1, RBM8A, SRSF4, ZC3H12A, UBC, FTO, KHDRBS1, UBA52, …	Improvers	Shared
GO_REGULATION_OF_VASCULATURE_DEVELOPMENT	1.83027e-06	9.7541e-05	0.643552	-0.451214	-1.78492	187	FGF2, TEK, SERPINE1, IL1B, GPR4, HGF, FGFBP1, ADAMTS9, ACVRL1, ENG, IL6, KDR, ETS1, TIE1, ITGA5, MYDGF, TNFAIP3, RGCC, APLNR, TNFRSF12A, PDGFB, SPHK1, ANGPT2, ID1, DNMT1, CDH5, EPHA2, ANXA3, FLT1, HSPB1, THBS1, JCAD, EFNB2, SFRP1, CXCR4, EMILIN1, ADGRB3, SPRY2, RUNX1, RAPGEF2, GHRL, ROCK2, NFATC2, TMEM100, TGFBR2, PTK2B, F3, RRAS	Improvers	Unique
GO_INFLAMMATORY_RESPONSE	2.12309e-06	0.000111228	0.627257	-0.38012	-1.62436	380	CALCRL, TEK, SOCS3, IL1RL1, CCR7, SERPINE1, TSLP, IL1B, BMP6, GPR4, EDNRB, HGF, SEMA7A, LRFN5, NLRC3, IL6, INS, ETS1, PPARD, S100A8, IL1R2, FOXF1, SELE, NFKBIA, IL17RB, TNFAIP3, TNFRSF1A, CCL7, RELB, IL33, SBNO2, ITGA2, IL1RN, NT5E, NLRP1, SPHK1, PTGIR, CHST2, IL1R1, TNFRSF11A, TYRO3, IDO1, CDH5, CSRP3, HAMP, EPHA2, GAL, OSMR, TGM2, CCL22, BMP2, THBS1, STAT5B, LPL, CXCR4, ZYX, PTGS1, CEBPB, RPS19…	Improvers	Unique
GO_TUMOR_NECROSIS_FACTOR_MEDIATED_SIGNALING_PATHWAY	2.16724e-06	0.000111649	0.627257	-0.549449	-1.98026	89	PSMC3, TRAF1, NFKBIA, TNFAIP3, PSME2, TNFRSF1A, PLVAP, TNFRSF12A, PSMD14, PSMD7, PSMD4, PSMB7, PSMD3, SPHK1, PSMB3, PSMB6, PSMC5, PSMB5, TNFRSF11A, ILK, KRT18, PSMC2, PSMD6, RACK1, PTPN2, IKBKG, FAS, BIRC3, PTK2B, RELA, ACTN4, PIAS3	Improvers	Shared
GO_RNA_EXPORT_FROM_NUCLEUS	2.44464e-06	0.000123875	0.627257	-0.548275	-1.97603	89	EIF5A, ALYREF, HNRNPA1, NUP107, RAN, EIF6, EIF4A3, NUP205, SRSF7, SRSF2, NUP35, LTV1, NUP188, XPO5, NUP93, NXT1, NSUN2, THOC6, DHX38, RPS15, RBM15B, DHX9, MAGOHB, SMG6, RBM8A, SRSF4, THOC5, KHDRBS1, NUP37, NUP62, NUP62CL, CPSF6, U2AF2, SSB, IWS1, HNRNPA2B1, CPSF3, MAGOH, POLDIP3, POM121, SUPT6H, CASC3, NUP50, THOC3, NPM1	Improvers	Shared
GO_SPLICEOSOMAL_SNRNP_ASSEMBLY	3.518e-06	0.000175392	0.627257	-0.728537	-2.11912	30	SNRPB, PRMT5, SNRPD1, GEMIN4, LSM4, SNRPD2, WDR77, PRPF3, PRPF8, TGS1, SART1, PRPF31, SNRPC, CD2BP2, PRPF6, GEMIN5, STRAP, PRPF19, GEMIN2, GEMIN7	Improvers	Shared
GO_REGULATION_OF_MRNA_CATABOLIC_PROCESS	3.82935e-06	0.000187881	0.610527	-0.504316	-1.90806	120	ZFP36, PSMC3, PSME2, PSMD14, PSMD7, PSMD4, APEX1, PSMB7, PSMD3, PKP1, PSMB3, PSMB6, EIF4G1, PSMC5, PSMB5, EXOSC2, FUS, PSMC2, HSPB1, EXOSC4, RPS27A, PSMD6, EXOSC8, MYD88, BTG2, TBRG4, GTPBP1, ROCK2, PKP3, METTL16, CIRBP, POLR2G, DHX34, SYNCRIP, AKT1, DHX9, ZFP36L1, ZC3H12A, UBC, FTO, UBA52	Improvers	Shared
GO_REGULATION_OF_CELL_CYCLE_G2_M_PHASE_TRANSITION	4.1188e-06	0.000198925	0.610527	-0.506356	-1.9172	121	TUBB, PSMC3, TUBB4B, PSME2, PSMD14, CDKN1A, PSMD7, PSMD4, PSMB7, PSMD3, PSMB3, CETN2, PSMB6, PSMC5, PSMB5, TUBA1A, CCND1, PSMC2, CDC7, PSMD6, MAPRE1, CDC6, CDK2, BRD4, ACTR1A, UIMC1, RBX1, DYRK3, SIN3A, SSNA1, SDCCAG8, CLSPN	Improvers	Shared
GO_POSITIVE_REGULATION_OF_VASCULATURE_DEVELOPMENT	4.43246e-06	0.000208956	0.610527	-0.502984	-1.88857	111	FGF2, TEK, SERPINE1, IL1B, HGF, FGFBP1, ACVRL1, ENG, KDR, ETS1, TIE1, ITGA5, MYDGF, APLNR, PDGFB, SPHK1, ANGPT2, CDH5, ANXA3, FLT1, HSPB1, THBS1, JCAD, EFNB2, CXCR4, RUNX1, RAPGEF2, GHRL, TMEM100, TGFBR2, PTK2B, F3, RRAS, BMPER, ZC3H12A, NOTCH1, ITGB1, STAT3, ABL1, AGTR1	Improvers	Unique
GO_ESTABLISHMENT_OF_RNA_LOCALIZATION	4.4617e-06	0.000208956	0.610527	-0.494328	-1.88111	129	ZFP36, EIF5A, ALYREF, HNRNPA1, CETN2, NUP107, RAN, EIF6, EIF4A3, NUP205, SRSF7, SRSF2, NUP35, LTV1, NUP188, XPO5, NUTF2, NUP93, NXT1, NSUN2, THOC6, DHX38, TGFBR2, RPS15, RBM15B, DHX9, MAGOHB, SMG6, ZFP36L1, RBM8A, SRSF4, MVP, THOC5, ATR, KHDRBS1, NUP37, RFTN1, NUP62, NUP62CL, CPSF6, U2AF2, MX2, SSB, YBX1	Improvers	Shared
GO_ENDOTHELIAL_CELL_MIGRATION	4.55988e-06	0.000210367	0.610527	-0.484684	-1.85163	133	FGF2, TEK, NRP2, FGFBP1, ADAMTS9, S100A2, ACVRL1, KDR, ETS1, STC1, RGCC, PLPP3, MYH9, PDGFB, ANGPT2, CLEC14A, ID1, PTP4A3, CDH5, EPHA2, ANXA3, HSPB1, THBS1, JCAD, STAT5A, EFNB2, MEF2C, PXN, ROCK2, PTK2B, RRAS, AAMP, AKT1, BMPER, ZC3H12A, APOH, NOTCH1, ITGB1, TNF, ABL1	Improvers	Unique
GO_TISSUE_MIGRATION	5.74988e-06	0.000258658	0.610527	-0.443048	-1.76277	191	FGF2, TEK, NRP2, FGFBP1, ADAMTS9, S100A2, ACVRL1, KDR, ETS1, PPARD, HBEGF, FOXF1, STC1, RGCC, PLPP3, ITGA2, MYH9, PDGFB, ANGPT2, CLEC14A, ID1, PTP4A3, PFN1, CDH5, EPHA2, ACTA2, ANXA3, HSPB1, THBS1, JCAD, STAT5A, EFNB2, MEF2C, ARSB, PXN, ROCK2, MAP4K4, TGFBR2, PTK2B, RRAS, AAMP, AKT1, BMPER, ZC3H12A, APOH, NOTCH1, ITGB1, TNF, ABL1, STARD13, MACF1, FGF7, ATP2B4, ACTC1, DLL4, TACSTD2, STRAP	Improvers	Shared
GO_TRANSCRIPTION_COUPLED_NUCLEOTIDE_EXCISION_REPAIR	5.774e-06	0.000258658	0.610527	-0.631299	-2.04148	52	ERCC1, COPS6, RPS27A, COPS3, POLD2, RPA2, CCNH, POLD1, RFC4, DDB1, RBX1, POLR2G, GTF2H2, GTF2H3, UBC, COPS4, UBA52, RFC3, PPIE, PRPF19, AQR, COPS7A, MNAT1, ERCC5, XAB2, CDK7, POLR2B, RFC5, COPS5, POLR2F, POLR2A	Improvers	Unique
GO_NEGATIVE_REGULATION_OF_CELL_CYCLE_G2_M_PHASE_TRANSITION	6.31428e-06	0.000278821	0.610527	-0.610182	-2.01263	57	PSMC3, PSME2, PSMD14, CDKN1A, PSMD7, PSMD4, PSMB7, PSMD3, PSMB3, PSMB6, PSMC5, PSMB5, PSMC2, PSMD6, CDC6, UIMC1, RBX1	Improvers	Shared
GO_RNA_SPLICING	6.42531e-06	0.000279727	0.610527	-0.3927	-1.6498	300	SNRPB, ALYREF, HNRNPA1, PRMT5, DAZAP1, DDX23, DDX46, FUS, SNRPD1, EIF4A3, SRRT, SNRPA1, SRSF7, SF3B3, SRSF2, SNRPA, GEMIN4, EFTUD2, NCL, LSM4, SNRPD2, SF3A3, WDR77, PRPF3, DHX15, ZPR1, TRA2A, PRPF8, TGS1, SART1, PQBP1, THOC6, DHX38, CTNNBL1, PRPF31, TCERG1, RBM28, METTL16, TSEN54, GPKOW, LSM6, SF3B2, CIRBP, SNRPC, AHNAK2, HNRNPF, RBM15B, POLR2G, GTF2F1, CD2BP2, SYNCRIP, PRPF6, DHX9, MAGOHB, ZBTB8…	Improvers	Shared
GO_CELL_CYCLE_G2_M_PHASE_TRANSITION	6.90677e-06	0.000296512	0.610527	-0.457817	-1.78359	158	NES, TUBB, PSMC3, TUBB4B, PSME2, PSMD14, CDKN1A, PSMD7, PSMD4, PSMB7, PLK3, PSMD3, PSMB3, CETN2, PSMB6, PSMC5, PSMB5, TUBA1A, CCND1, PSMC2, CDC7, PSMD6, MAPRE1, CCNH, CDC6, CDK2, BRD4, ACTR1A, UIMC1, RBX1, DYRK3, SIN3A, FBXL6, SSNA1, SDCCAG8, CLSPN, AKAP8, KHDRBS1, FBXL8, YWHAE, CEP152	Improvers	Shared
GO_POSITIVE_REGULATION_OF_DNA_METABOLIC_PROCESS	7.1994e-06	0.000304841	0.610527	-0.506758	-1.90437	114	FGF2, HGF, IL6, MYC, GNL3, RGCC, CLCF1, PDGFB, HNRNPA1, WRAP53, ERCC1, DTX3L, DKC1, FUS, ANXA3, PARP1, CDK2, CCT2, MSH2, RFC4, CCT6A, UIMC1, CCT7, PTK2B, NABP2, CCT3, UBE2N, RPS3, CHTF18, AKT1, DHX9, XRCC5, TRIM28, PRRX1, MAD2L2, ATR, WRN, OTUD4, PAK3, MLH1, HNRNPD, RFC3, SLF1, NBN, ARID2	Improvers	Unique
GO_ENDOTHELIUM_DEVELOPMENT	8.71948e-06	0.000364215	0.593325	-0.557671	-1.95132	75	IL1B, S1PR1, BMP6, ACVRL1, ENG, KDR, VCL, STC1, TNFRSF1A, ROBO4, ID1, MYADM, CDH5, EDF1, PDPN, CXCR4, RAPGEF2, NRG1, COL22A1, ROCK2, TMEM100	Improvers	Shared
GO_CELL_JUNCTION_ORGANIZATION	9.08585e-06	0.000374458	0.593325	-0.36248	-1.5662	420	TEK, NRP2, IL1B, BMP6, TUBB, OXTR, CAV1, GAP43, SPARCL1, SNAI1, CLDN14, ACVRL1, LRFN5, FLNC, INS, KDR, VCL, SNAI2, ITGA5, LAMA3, FERMT2, PCDHGC3, PCDHB13, ITGA2, ARHGAP6, SPOCK2, PKP1, EIF4G1, ACTB, PPFIBP1, PFN1, SEMA3F, CDH5, TUBA1A, EPHA2, RASSF8, DST, ILK, WDR1, THBS1, EFNB2, SFRP1, PCDHB10, KIFC3, CDH1, ADGRB3, MEF2C, SMAD7, COL17A1, PCDHB16, RUNX1, RAPGEF2, NRG1, PCDHB3, PCDHB14, PCDHB5, AR…	Improvers	Unique
GO_EPITHELIAL_CELL_DIFFERENTIATION	9.5714e-06	0.000389279	0.593325	-0.37028	-1.57611	350	FGF2, RHCG, SERPINE1, LIF, IL1B, S1PR1, BMP6, ZFP36, SFN, GPR4, CAV1, ACVRL1, ENG, PRDM1, KDR, VCL, CDSN, FOXF1, STC1, TNFRSF1A, PODXL, ROBO4, CDKN1A, ITGA2, KRT7, PDGFB, PKP1, ID1, AIMP2, TBX3, MYADM, CDH5, EPHA2, NPY, ACTA2, CCND1, EDF1, KRT18, KRT10, BMP2, DHRS9, PDPN, KRT19, STAT5B, CXCR4, PELO, E2F4, SULT2B1, MEF2C, CEBPB, WDR77, CTSL, SPRY2, RUNX1, RAPGEF2, NRG1, TMOD1, BCCIP, COL22A1, KRT8…	Improvers	Unique
GO_DNA_RECOMBINATION	9.83411e-06	0.000394769	0.593325	-0.465997	-1.79373	144	FEN1, CLCF1, PSMD14, APEX1, MCM5, ALYREF, WRAP53, ERCC1, MCM4, FUS, RUVBL2, XRCC3, PARP1, XRCC6, CDC7, INO80, RPA2, IL7R, KPNA1, CENPX, ACTL6A, TCF7, MSH2, NABP1, INO80C, MCRS1, SMC5, NABP2, UBE2N, RBBP8, XRCC5, PAGR1, MAD2L2, FANCM, WRN, MLH1, NSMCE1, MCM2, RECQL, NBN, ARID2	Improvers	Shared
GO_NIK_NF_KAPPAB_SIGNALING	1.06075e-05	0.000420354	0.593325	-0.537042	-1.93375	91	IL1B, PSMC3, NLRC3, NFKBIA, PSME2, RELB, PSMD14, PSMD7, PSMD4, PSMB7, PSMD3, SPHK1, PSMB3, PSMB6, BCL3, PSMC5, PSMB5, PTP4A3, ILK, PSMC2, PSMD6, RIPK3, IRAK1, ALK, BIRC3, PHB2, TNFRSF10A, RELA, RPS3, ACTN4, AKT1, ZC3H12A, TNF	Improvers	Shared
GO_PROTEIN_TARGETING_TO_MEMBRANE	1.09738e-05	0.000422809	0.593325	-0.492933	-1.85512	115	RPL35, RPS9, RPL41, RPS5, RPL10, SSR3, RPL27, RPS21, RPL28, RPS27A, RPS7, RPLP0, RPLP2, RPS12, PEX5, RPS19, RPL21, RPL17, RPS29, RPL29, RPS4Y1, PARD3, RPL9, RPL37A, RPL12, RPS15, RPL13, HRAS, RPL39, INPP5K, RPL36, RPL24, YIF1B, RPS14, RPS3, SGTA, RPL7, RPS11, RPL11, RPL30, MTCL1, UBA52, RPS4X, HSPA5, RPS13, RPS26, ZDHHC12, RPL7A, RPS16, AQP11, RPL14, RPL6, ZDHHC14, RPL31, FIS1, RPS25	Improvers	Shared
GO_MORPHOGENESIS_OF_AN_EPITHELIUM	1.10148e-05	0.000422809	0.593325	-0.383565	-1.61759	309	FGF2, SOCS3, LIF, HGF, PSMC3, SNAI1, ACVRL1, ENG, KDR, MYC, HBEGF, VCL, FOXF1, SNAI2, ITGA5, PSME2, PODXL, LAMA3, PSMD14, PSMD7, PSMD4, PSMB7, PSMD3, PSMB3, PSMB6, TBX2, ACTB, PSMC5, PSMB5, TBX3, PFN1, EPHA2, TGM2, GLI2, ILK, BMP2, PSMC2, PDPN, WDR1, NDRG4, EFNB2, SFRP1, CXCR4, RPS7, MICAL2, MEF2C, PSMD6, SPRY2, SEMA3C, AP2M1, MPP5, RIPK4, TULP3, TGFBR2, AP2A1, IFT57, PHB2, TGFB1I1, KRT17, CFL1, …	Improvers	Shared
GO_RIBOSOME_ASSEMBLY	1.10798e-05	0.000422809	0.593325	-0.669391	-2.06648	37	MPV17L2, RPS5, EIF6, RPL10, DHX37, NIP7, RPLP0, RPS19, BRIX1, ABT1, EFL1, RPL12, RPF2, RPS15, RRP7A, FP565260.1, RPL24, PWP2, RPS14, XRCC5, MRPS7, RPL11, ERAL1, MRPL11, RPL6, MRPL22, DHX30, NOP53, NPM1, MRPS2, DDX28	Improvers	Shared
GO_AMEBOIDAL_TYPE_CELL_MIGRATION	1.16506e-05	0.000439171	0.593325	-0.403153	-1.65873	251	FGF2, TEK, NRP2, AKAP12, EDNRB, FGFBP1, ADAMTS9, S100A2, SEMA7A, ACVRL1, KDR, ETS1, PPARD, HBEGF, STC1, RGCC, PLPP3, ITGA2, MYH9, PDGFB, ANGPT2, CLEC14A, ID1, PTP4A3, PFN1, SEMA3F, CDH5, EPHA2, ANXA3, ILK, HSPB1, THBS1, JCAD, STAT5A, EFNB2, MEF2C, ARSB, PXN, SEMA3C, ROCK2, MAP4K4, CAP1, TGFBR2, AMOTL2, PTK2B, RRAS, AAMP, CFL1, SYDE1, GNA12, AKT1, BMPER, ZC3H12A, APOH, EFNB1, NOTCH1, ITGB1, TNF, A…	Improvers	Shared
GO_REGULATION_OF_HEMATOPOIETIC_PROGENITOR_CELL_DIFFERENTIATION	1.21096e-05	0.000450971	0.593325	-0.650061	-2.05548	43	PSMC3, PSME2, PSMD14, PSMD7, PSMD4, PSMB7, PSMD3, PSMB3, PSMB6, PSMC5, PSMB5, PSMC2, PSMD6, RUNX1, PUS7	Improvers	Shared
GO_TRNA_METABOLIC_PROCESS	1.33233e-05	0.000490265	0.593325	-0.490409	-1.84917	116	FTSJ1, POP1, QTRT2, AIMP2, EXOSC2, TRMT6, CTU2, FARS2, PPA1, EXOSC8, PUS7, POP7, NSUN2, ELAC2, URM1, TRMT1, CDK5RAP1, NAT10, TSEN54, LSM6, THG1L, PUSL1, THADA, RPP40, ZBTB8OS, ADAT1, TPRKB, LAGE3, SSB, TRMT112, QTRT1, ELP3, ALKBH8, CDKAL1, POP5, OSGEP	Improvers	Shared
GO_REGULATION_OF_EPITHELIAL_CELL_DIFFERENTIATION	1.37703e-05	0.000493156	0.593325	-0.533001	-1.91264	86	FGF2, SERPINE1, LIF, IL1B, BMP6, ZFP36, SFN, CAV1, ACVRL1, VCL, CDSN, TNFRSF1A, ID1, TBX3, CDH5, CCND1, STAT5B, SULT2B1, CEBPB, CTSL, SPRY2, RUNX1, ROCK2, TMEM100	Improvers	Shared
GO_PROTEIN_LOCALIZATION_TO_NUCLEUS	1.37975e-05	0.000493156	0.593325	-0.442876	-1.74339	173	KPNA7, LIF, INS, NFKBIA, PKIG, CDKN1A, LMNA, NUP107, WRAP53, BCL3, DTX3L, RAN, DKC1, NOL8, PARP1, BAG3, NUP35, NUP188, NUTF2, NUP93, CDH1, NXT1, KPNA1, ZPR1, NOLC1, RASSF5, CCT2, TXN, RANGAP1, CCT6A, SUMO3, RPF2, CCT7, PHB2, MCRS1, CCT3, SIN3A, AKT1, TRIM28, RPL11, ZC3H12A, STAT3, WRN, NUP62, NUP62CL, YWHAE	Improvers	Shared
GO_BLOOD_VESSEL_ENDOTHELIAL_CELL_MIGRATION	1.38805e-05	0.000493156	0.593325	-0.559406	-1.97666	77	FGF2, FGFBP1, ACVRL1, KDR, ETS1, RGCC, MYH9, PDGFB, ANGPT2, CLEC14A, ID1, CDH5, EPHA2, HSPB1, THBS1, JCAD, STAT5A, EFNB2, MEF2C, PTK2B, AKT1, NOTCH1, ITGB1, TNF, ABL1, STARD13, ATP2B4, DLL4, GADD45A, AMOTL1	Improvers	Shared
GO_POSITIVE_REGULATION_OF_CELL_POPULATION_PROLIFERATION	1.44581e-05	0.00050784	0.593325	-0.340805	-1.49311	492	FGF2, CALCRL, TEK, NES, CSF3, PNP, NRP2, LIF, TSLP, FOSL1, IL1B, S1PR1, BMP6, EDNRB, IL11, IL24, FGFBP1, ACVRL1, IL6, INS, KDR, MYC, ETS1, PPARD, HBEGF, FOXF1, MYDGF, TNFAIP3, APLNR, CLCF1, CDKN1A, GPR183, ITGA2, TNS3, TSHR, EIF5A, PDGFB, SPHK1, RPS9, ID1, TBX2, DNMT1, TBX3, TNFRSF11A, OSMR, TGM2, REG1A, CCND1, GLI2, ANXA2, ILK, ESM1, JAK3, SHC4, BMP2, FLT1, RUNX2, LIFR, THBS1, STAT5B, JCAD, STAT…	Improvers	Shared
GO_POSITIVE_REGULATION_OF_CELLULAR_AMIDE_METABOLIC_PROCESS	1.55296e-05	0.000539349	0.57561	-0.509008	-1.89745	104	IL6, TNFRSF1A, ITGA2, EIF5A, RPS9, JMJD4, MPV17L2, EIF4G1, BCL3, EIF6, EIF4A3, THBS1, USP16, CDC123, RACK1, PASK, ROCK2, CDK5RAP1, CNBP, SMPD2, EIF3D, LARP6, NAT10, PTK2B, CIRBP, KRT17, POLR2G, NSUN5, RELA, DHX9, NGRN, RPL30, KHDRBS1, TNF, RPS4X, TRUB2, PCIF1	Improvers	Shared
GO_NUCLEOTIDE_EXCISION_REPAIR	1.60262e-05	0.00055041	0.57561	-0.564575	-1.96296	73	CETN2, ERCC1, PARP1, COPS6, RPS27A, COPS3, POLD2, RPA2, CCNH, POLD1, RFC4, DDB1, RBX1, POLR2G, GTF2H2, GTF2H3, UBC, COPS4, UBA52, COMMD1, RFC3, PPIE, PRPF19, AQR, COPS7A, MNAT1, ERCC5, XAB2, CDK7, POLR2B, RFC5, TP53, COPS5, POLR2F, POLE, POLR2A	Improvers	Unique
GO_MYELOID_CELL_DIFFERENTIATION	1.83663e-05	0.000623848	0.57561	-0.40935	-1.65878	222	CSF3, CCR7, LIF, ADGRF5, ZFP36, IL11, JUNB, MYC, ETS1, NKX2-3, NFKBIA, RELB, SBNO2, GPR183, MYH9, TNFRSF11A, EIF6, EPHA2, INHBA, ANXA2, PARP1, JAK3, WDR1, ISG15, KLF10, THBS1, STAT5B, EPAS1, SFRP1, MEF2C, CEBPB, RPS19, RUNX1, PTPN2, TESC, SENP1, MT1G, IRF7, TGFBR2, G6PD, PTK2B, FSTL3, DYRK3, FOS, NOTCH2, SIN3A, ITPKB, RPS14, PIAS3, RARA, WDR61, ZFP36L1, KAT8, FADD, THOC5, KMT2D, TNF, STAT3	Improvers	Unique
GO_REGULATION_OF_CELLULAR_AMINO_ACID_METABOLIC_PROCESS	1.93013e-05	0.000648481	0.57561	-0.711803	-2.05032	29	PSMC3, INS, PSME2, PSMD14, PSMD7, PSMD4, PSMB7, PSMD3, PSMB3, PSMB6, PSMC5, PSMB5, PSMC2, PSMD6	Improvers	Shared
GO_MATURATION_OF_5_8S_RRNA	2.30865e-05	0.000759151	0.57561	-0.757376	-2.10191	23	PES1, EXOSC2, EIF6, MAK16, NOP14, EXOSC4, RPS21, EXOSC8, KRI1, ABT1, WDR12, ERI1, RPF1, RPP40, LAS1L	Improvers	Shared
GO_REGULATION_OF_HEMOPOIESIS	2.45016e-05	0.000797204	0.57561	-0.392902	-1.61503	250	CSF3, PNP, LIF, IL1B, ZFP36, PSMC3, PRDM1, MYC, ETS1, NFKBIA, PSME2, PSMD14, PSMD7, PSMD4, PSMB7, PSMD3, PSMB3, PSMB6, PSMC5, PSMB5, EIF6, INHBA, GLI2, JAK3, PSMC2, ISG15, KLF10, THBS1, STAT5B, SFRP1, XRCC6, MIR17HG, MEF2C, SMAD7, CEBPB, PSMD6, IL7R, RUNX1, PUS7, PTPN2, TESC, SENP1, SART1, NFATC2, TCF7, IRF7, TGFBR2, PTK2B, FSTL3, AP3B1, AXL, FOS, NOTCH2, SIN3A, ITPKB, PIAS3, RARA, WDR61, ZFP36L1…	Improvers	Shared
GO_MITOCHONDRIAL_TRANSLATION	2.63913e-05	0.000849746	0.57561	-0.504626	-1.84773	94	MPV17L2, MRPL3, DAP3, AURKAIP1, MRPL54, CDK5RAP1, MRPL52, MRPS28, MRPL27, MRPL4, MRPS7, TUFM, NGRN, MRPS22, MRPS12, TRUB2, MRPS23, ERAL1, MRPL58, MRRF, MRPL15, MRPL47, MRPS16, MRPL11, GFM1, MRPL23, MRPS14, RPUSD3, MRPL22, SHMT2, MRPL21, MRPS34, MRPS10, MRPL40, MRPS15, MRPS21, MRPL17, MRPS2, RARS2, MRPL10, MRPL2, MRPL16, MRPL41, MRPL32, MRPL18, MRPS26, MRPL13, MRPL12, OXA1L, MRPL55, MRPS31	Improvers	Shared
GO_PROTEIN_MODIFICATION_BY_SMALL_PROTEIN_REMOVAL	2.77303e-05	0.000883654	0.57561	-0.437099	-1.7265	178	PSMC3, MYC, NFKBIA, TNFAIP3, PSME2, IL33, PSMD14, PSMD7, PSMD4, PSMB7, PSMD3, PSMB3, PSMB6, ACTB, PSMC5, PSMB5, UFD1, PSMC2, COPS6, RPS27A, COPS3, SMAD7, INO80, PSMD6, USP16, UCHL1, IKBKG, ACTL6A, SENP1, USP5, BIRC3, TNIP1, USP31, UIMC1, INO80C, MCRS1, HCFC1, CLSPN, ZC3H12A, UBC, COPS4, UBA52, OTUD4, SUPT3H, USP10, DESI1, USP36	Improvers	Shared
GO_TRANSLATIONAL_ELONGATION	2.84505e-05	0.000897352	0.57561	-0.51573	-1.90289	97	EIF5A, EEF1B2, MRPL3, EIF4A3, RPLP2, USP16, RACK1, DAP3, GTPBP1, AURKAIP1, MRPL54, EFL1, MRPL52, MRPS28, MRPL27, TRNAU1AP, MRPL4, EEF1A1, MRPS7, TUFM, EEF1A2, MRPS22, RPL30, MRPS12, MRPS23, ERAL1, MRPL58, MRPL15, MRPL47, MRPS16, MRPL11, GFM1, MRPL23, MRPS14, MRPL22, MRPL21, MRPS34, MRPS10, MRPL40, GTPBP2, MRPS15, MRPS21, EEF2, MRPL17, DIO2, MRPS2	Improvers	Shared
GO_RESPONSE_TO_TUMOR_NECROSIS_FACTOR	3.07768e-05	0.000960921	0.557332	-0.440098	-1.72386	164	AKAP12, ZFP36, PSMC3, TRAF1, SELE, NFKBIA, TNFAIP3, PSME2, TNFRSF1A, CCL7, PLVAP, TNFRSF12A, PSMD14, PSMD7, PSMD4, PSMB7, PSMD3, SPHK1, PSMB3, PSMB6, PSMC5, PSMB5, TNFRSF11A, HAMP, ILK, KRT18, CCL22, PSMC2, ABCC2, THBS1, SFRP1, PSMD6, RACK1, PRPF8, NR1D1, PTPN2, IKBKG, FAS, BIRC3, ARHGEF2, PTK2B, INPP5K, NFKB1, ANKRD1, RELA, RPS3, ACTN4, CCL2, PIAS3, AKT1, DHX9, ZFP36L1	Improvers	Shared
GO_MATURATION_OF_LSU_RRNA	3.22106e-05	0.00099563	0.557332	-0.778549	-2.045	19	GTPBP4, RPL35, PES1, EIF6, NHP2, MAK16, RPF2, WDR12, RPL7, RSL1D1, RPF1, LAS1L, RPL7A, DDX18	Improvers	Shared
GO_RESPONSE_TO_OXYGEN_LEVELS	3.52944e-05	0.0010691	0.557332	-0.39968	-1.63294	237	TEK, OXTR, TRPC6, CAV1, PSMC3, ACVRL1, MYC, ETS1, PPARD, STC1, RGCC, PSME2, PSMD14, CDKN1A, ITGA2, PSMD7, PSMD4, PSMB7, PLK3, PSMD3, ANGPT2, PSMB3, LMNA, PSMB6, PSMC5, PSMB5, REG1A, EIF4EBP1, BMP2, PSMC2, PDPN, THBS1, EPAS1, CHCHD2, SFRP1, CXCR4, RPS27A, PSMD6, AGTRAP, IRAK1, HYOU1, TBL2, FAS, ROCK2, TGFBR2, HMOX2, PHB2, PTK2B, RBX1, KCNK3, ANKRD1, SUV39H2, ACTN4, PLAT, AKT1, BNIP1, ZFP36L1, UBC,…	Improvers	Shared
GO_POSITIVE_REGULATION_OF_TRANSLATION	3.57868e-05	0.0010691	0.557332	-0.530669	-1.8905	83	IL6, ITGA2, EIF5A, RPS9, JMJD4, MPV17L2, EIF4G1, BCL3, EIF6, EIF4A3, THBS1, USP16, CDC123, PASK, CDK5RAP1, CNBP, EIF3D, LARP6, NAT10, PTK2B, CIRBP, KRT17, POLR2G, NSUN5, DHX9, NGRN, RPL30, KHDRBS1, TNF, RPS4X, TRUB2, PCIF1	Improvers	Shared
GO_DNA_GEOMETRIC_CHANGE	3.79645e-05	0.0011176	0.557332	-0.550277	-1.89969	71	HMGA1, MCM5, CETN2, MCM4, RUVBL2, PARP1, TWNK, RPS27A, XRCC6, ASCC3, RFC4, DDB1, RBX1, GTF2H2, CHTF18, DHX9, XRCC5, GTF2H3, UBC, FANCM, UBA52, WRN, GTF2F2, RAD54L2, RFC3, MCM2, RECQL, NBN, HNRNPA2B1, MNAT1, RAD18, RFC5, TP53, ANXA1, RAD50, GINS4	Improvers	Shared
GO_POSITIVE_REGULATION_OF_DNA_BIOSYNTHETIC_PROCESS	4.53962e-05	0.00130439	0.557332	-0.618607	-1.9768	45	FGF2, HGF, MYC, RGCC, PDGFB, HNRNPA1, WRAP53, DKC1, CCT2, RFC4, CCT6A, CCT7, PTK2B, CCT3, CHTF18, XRCC5, ATR, PAK3, HNRNPD, RFC3	Improvers	Unique
GO_ENDOTHELIAL_CELL_PROLIFERATION	4.55756e-05	0.00130439	0.557332	-0.509018	-1.87812	97	FGF2, TEK, NRP2, BMP6, CAV1, FGFBP1, ACVRL1, KDR, MYDGF, RGCC, APLNR, PDGFB, EPHA2, BMP2, FLT1, THBS1, JCAD, STAT5A, MEF2C, GHRL, RPTOR, F3, CCL2, AKT1, BMPER, APOH, TNF, STAT3, AGTR1	Improvers	Unique
GO_REGULATION_OF_CELLULAR_AMIDE_METABOLIC_PROCESS	4.62058e-05	0.00131029	0.557332	-0.381761	-1.58426	277	ZFP36, IL6, TNFRSF1A, ITGA2, EIF5A, SPHK1, RPS9, EIF3B, JMJD4, MPV17L2, EIF4G1, BCL3, EIF6, RPL10, GSPT1, EIF4A3, EIF2S1, EIF4EBP1, HSPB1, GAPDH, TCOF1, NCL, THBS1, EIF5B, GCN1, USP16, PUS7, ILF3, NOLC1, CDC123, RACK1, BTG2, PASK, ROCK2, CDK5RAP1, CNBP, ETF1, SMPD2, ORMDL2, EIF3D, LARP6, CNOT9, NAT10, METTL16, EIF3K, PTK2B, CIRBP, KRT17, NGDN, DAPK3, TRNAU1AP, POLR2G, NSUN5, RELA, RPS14, RPS3, RA…	Improvers	Shared
GO_NUCLEOTIDE_EXCISION_REPAIR_DNA_INCISION	4.75972e-05	0.00133748	0.557332	-0.697051	-2.00783	29	ERCC1, PARP1, RPS27A, POLD2, RPA2, POLD1, RFC4, DDB1, RBX1, GTF2H2, GTF2H3, UBC, UBA52, RFC3, ERCC5, RFC5	Improvers	Unique
GO_CELL_CYCLE_PHASE_TRANSITION	4.88023e-05	0.00135899	0.557332	-0.356541	-1.52765	373	NES, SFN, TUBB, PSMC3, TUBB4B, MYC, RGCC, PSME2, PSMD14, CDKN1A, PSMD7, PSMD4, APEX1, PSMB7, PLK3, PSMD3, MCM5, PSMB3, CETN2, PSMB6, EIF4G1, PSMC5, PSMB5, MCM4, TUBA1A, GSPT1, INHBA, CCND1, XRCC3, EIF4EBP1, PSMC2, CDC34, CDK2AP2, E2F4, CDC7, INO80, PSMD6, RPA2, MAPRE1, ZPR1, BTG2, POLA1, CCNH, POLA2, CDC6, CDK2, TIPIN, RPTOR, BRD4, ACTR1A, DDB1, CNOT9, UIMC1, ORC3, PHB2, RBX1, CTDSP2, DYRK3, ANAP…	Improvers	Shared
GO_MRNA_TRANSPORT	4.92479e-05	0.00135915	0.557332	-0.497888	-1.84325	99	ZFP36, EIF5A, ALYREF, HNRNPA1, CETN2, NUP107, EIF4A3, NUP205, SRSF7, SRSF2, NUP35, NUP188, NUTF2, NUP93, NXT1, NSUN2, THOC6, DHX38, RBM15B, DHX9, MAGOHB, SMG6, ZFP36L1, RBM8A, SRSF4, MVP, THOC5, NUP37, NUP62, U2AF2, MX2, IWS1, HNRNPA2B1, CPSF3, MAGOH, POLDIP3, POM121, SUPT6H, CASC3, NUP50, THOC3, KHSRP, GLE1, ZC3H3, DDX19B, HNRNPA1L2, EIF4E, HSF1, U2AF1L4, NUP54	Improvers	Shared
GO_MORPHOGENESIS_OF_A_POLARIZED_EPITHELIUM	5.62981e-05	0.00150015	0.557332	-0.50644	-1.8125	84	PSMC3, FOXF1, PSME2, LAMA3, PSMD14, PSMD7, PSMD4, PSMB7, PSMD3, PSMB3, PSMB6, ACTB, PSMC5, PSMB5, PFN1, PSMC2, WDR1, SFRP1, PSMD6	Improvers	Shared
GO_PROTEIN_DNA_COMPLEX_SUBUNIT_ORGANIZATION	5.74494e-05	0.00151774	0.557332	-0.47484	-1.79787	121	PSMC3, MYC, HMGA1, GRWD1, MCM5, HAT1, CETN2, POLR1E, PSMC5, MCM4, PARP1, PSMC2, RPS27A, INO80, RPA2, CENPX, CCNH, TAF1B, DDB1, ORC3, RBX1, DAXX, GTF2H2, TCF4, GTF2H3, UBC, CHAF1A, UBA52, TAF12, BRD2, SUPT16H, MCM2, ARID2, MNAT1, SMARCA4, ERCC5, CENPH, CDK7, VPS72, KAT6A, SWI5, RNF4, TP53, SUPT6H, ANP32B, NPM1, BAZ2A, HEY2, MIS18A, GTF2B	Improvers	Shared
GO_REGULATION_OF_MITOTIC_CELL_CYCLE	6.31464e-05	0.00165412	0.538434	-0.350428	-1.49994	385	IL1B, SFN, TUBB, PSMC3, TUBB4B, INS, RGCC, PSME2, PSMD14, CDKN1A, PSMD7, PSMD4, APEX1, PSMB7, PLK3, PSMD3, PDGFB, SPHK1, PSMB3, CETN2, PRMT5, PSMB6, EIF4G1, PSMC5, PSMB5, BTG3, TUBA1A, CCND1, XRCC3, EIF4EBP1, WNT9A, PSMC2, STAT5B, CDK2AP2, E2F4, CDC7, GBF1, INO80, PSMD6, RPA2, MAPRE1, BTG2, CDC6, CDK2, AURKAIP1, TIPIN, RPTOR, BRD4, MSH2, AFAP1L2, ACTR1A, DDB1, CNOT9, NABP1, PHB2, HRAS, RBX1, CTDS…	Improvers	Shared
GO_TRANSLATIONAL_TERMINATION	6.67787e-05	0.00173456	0.538434	-0.531051	-1.88441	78	EIF5A, JMJD4, MRPL3, GSPT1, DAP3, AURKAIP1, MRPL54, ETF1, MRPL52, MRPS28, MRPL27, MRPL4, MRPS7, MRPS22, MRPS12, MRPS23, TRMT112, ERAL1, MRPL58, MRRF, MRPL15, MRPL47, MRPS16, MRPL11, MRPL23, MRPS14, MRPL22, MRPL21, MRPS34, MRPS10, MRPL40, MRPS15, MRPS21, MRPL17, MRPS2, GLE1, MRPL10, MRPL2, MRPL16, MRPL41, MRPL32, MRPL18, MRPS26, MRPL13, MRPL12, OXA1L, MRPL55, MRPS31	Improvers	Shared
GO_TRANSITION_METAL_ION_HOMEOSTASIS	8.63913e-05	0.0022253	0.538434	-0.517192	-1.80718	74	ERFE, BMP6, MT2A, MYC, S100A8, MT1X, SLC39A7, HAMP, GLRX3, SLC25A28, EPAS1, STEAP3, FTL, SLC39A14, MT1G, HMOX2, NUBP1	Improvers	Unique
GO_TRNA_PROCESSING	9.42149e-05	0.00240676	0.538434	-0.505121	-1.81881	91	FTSJ1, POP1, QTRT2, TRMT6, CTU2, FARS2, PUS7, POP7, NSUN2, ELAC2, URM1, TRMT1, CDK5RAP1, NAT10, TSEN54, LSM6, THG1L, PUSL1, THADA, RPP40, ZBTB8OS, ADAT1, TPRKB, LAGE3, SSB, TRMT112, QTRT1, ELP3, ALKBH8, CDKAL1, POP5, OSGEP	Improvers	Shared
GO_STEM_CELL_DIFFERENTIATION	9.5765e-05	0.00242631	0.538434	-0.459649	-1.74616	131	NRP2, LIF, EDNRB, PSMC3, SEMA7A, SNAI2, PSME2, PSMD14, PSMD7, PSMD4, PSMB7, PSMD3, PSMB3, PSMB6, TBX2, PSMC5, PSMB5, SEMA3F, JARID2, SHC4, RUNX2, PSMC2, TCOF1, SFRP1, MEF2C, PSMD6, RUNX1, PUS7, NRG1, NOLC1, NSUN2, PWP1, SEMA3C, PEF1	Improvers	Shared
GO_TRANSCRIPTION_BY_RNA_POLYMERASE_I	0.000105618	0.00260123	0.538434	-0.603765	-1.92937	45	HEATR1, POLR1E, TCOF1, NCL, DHX33, CCNH, PWP1, TAF1B, GTF2H2, GTF2H3, MAF1, POLR1C, CAVIN1, POLR1B, TAF1D, MTOR, MNAT1, SMARCA4, NOL11, CDK7, TTF1, NOP53, POLR2F, BAZ2A, RASL11A, ERCC3	Improvers	Shared
GO_MRNA_EXPORT_FROM_NUCLEUS	0.000105761	0.00260123	0.538434	-0.527671	-1.82853	72	EIF5A, ALYREF, NUP107, EIF4A3, NUP205, SRSF7, SRSF2, NUP35, NUP188, NUP93, NXT1, NSUN2, THOC6, DHX38, RBM15B, MAGOHB, SMG6, RBM8A, SRSF4, THOC5, NUP37, NUP62, U2AF2, IWS1, HNRNPA2B1, CPSF3, MAGOH, POLDIP3, POM121, SUPT6H, CASC3, NUP50, THOC3	Improvers	Shared
GO_REGULATION_OF_ENDOTHELIAL_CELL_MIGRATION	0.000106035	0.00260123	0.538434	-0.482251	-1.7977	104	FGF2, TEK, NRP2, FGFBP1, ADAMTS9, ACVRL1, KDR, ETS1, STC1, RGCC, PLPP3, PDGFB, ANGPT2, EPHA2, ANXA3, HSPB1, THBS1, JCAD, STAT5A, MEF2C, ROCK2, PTK2B, RRAS, AAMP, AKT1, BMPER, ZC3H12A, APOH, NOTCH1, TNF, ABL1	Improvers	Unique
GO_REGULATION_OF_TELOMERE_MAINTENANCE	0.000110042	0.00265733	0.538434	-0.602814	-1.92633	45	MYC, GNL3, STN1, HNRNPA1, ERCC1, DKC1, PARP1, CCT2, NAT10, CCT6A, CCT7, NABP2, CCT3, XRCC5, SMG6, ATR, HDAC8, HNRNPD, NBN, HNRNPA2B1	Improvers	Shared
GO_RESPONSE_TO_LIPID	0.000112248	0.00267433	0.538434	-0.332727	-1.45726	488	THBD, CSF3, CCR7, SERPINE1, AKAP12, FOSL1, IL1B, BMP6, ZFP36, OXTR, EDNRB, IL24, CAV1, AGXT, ENG, IL6, ETS1, PPARD, PDE4B, S100A8, SNAI2, SELE, NFKBIA, TIE1, STC1, TNFAIP3, SBNO2, PAPPA, CDKN1A, ITGA2, IL1RN, CSF2RB, PTGIR, SLIT3, SMAD6, DDX54, TNFRSF11A, IDO1, HAMP, RUVBL2, ANXA3, INHBA, CCND1, EIF4EBP1, PARP1, WNT9A, ABCC2, RPL27, SOCS2, THBS1, STAT5B, SFRP1, LPL, MEF2C, CEBPB, MYD88, RUNX1, CA…	Improvers	Unique
GO_CELLULAR_RESPONSE_TO_MOLECULE_OF_BACTERIAL_ORIGIN	0.000112476	0.00267433	0.538434	-0.479773	-1.78397	103	CSF3, SERPINE1, IL1B, BMP6, ZFP36, EDNRB, IL24, IL6, PPARD, PDE4B, NFKBIA, TNFAIP3, SBNO2, HAMP, ABCC2, MEF2C, CEBPB, MYD88, IRAK1, PRPF8, NR1D1, PLAA, CXCL5, SPON2, NFKB1, AXL, KMO, ANKRD1, RELA, CCL2, RARA, AKT1, ZC3H12A, AKAP8, TNF, ABL1	Improvers	Unique
GO_REGULATION_OF_CELLULAR_KETONE_METABOLIC_PROCESS	0.000126321	0.00298059	0.518848	-0.477591	-1.77802	101	IL1B, ERFE, BMP6, CAV1, PSMC3, INS, PPARD, FABP5, PSME2, PSMD14, PSMD7, PSMD4, PSMB7, PSMD3, PSMB3, PSMB6, PSMC5, PSMB5, EIF6, BMP2, PSMC2	Improvers	Shared
GO_CALCIUM_DEPENDENT_CELL_CELL_ADHESION_VIA_PLASMA_MEMBRANE_CELL_ADHESION_MOLECULES	0.00012837	0.00300599	0.518848	-0.72384	-2.00884	23	PCDHGC3, PCDHB13, CDH5, PCDHB10, PCDHB16, PCDHB3, PCDHB14, PCDHB5, CDH19, CDH11	Improvers	Unique
GO_EMBRYO_DEVELOPMENT_ENDING_IN_BIRTH_OR_EGG_HATCHING	0.000131818	0.00306352	0.518848	-0.342401	-1.46522	367	SOCS3, KPNA7, LIF, ADGRF5, FOSL1, JUNB, PSMC3, SNAI1, ACVRL1, PRDM1, FOXF1, TIE1, MYH9, PDGFB, SEC24D, TBX3, PHLDA2, PFN1, EPHA2, TM4SF1, HOXB6, EIF4A3, GLI2, BMP2, WNT9A, RUNX2, WDR74, TCOF1, KRT19, EPAS1, SFRP1, PELO, RPS7, COPS3, MEF2C, CEBPB, SLC34A2, ZPR1, NOLC1, NSUN2, ACTL6A, SEMA3C, GPR161, PEF1, TMEM100, TCF7, MSH2, TULP3, B9D1, BCOR, EXT1, TGFBR2, RRP7A, IFT57, LFNG, INPP5K, CFL1, GNA12…	Improvers	Shared
GO_CELL_CYCLE_DNA_REPLICATION	0.000143091	0.00325216	0.518848	-0.628341	-1.93976	37	FEN1, MCM5, MCM4, CDC7, INO80, POLD2, RPA2, ZPR1, POLA1, POLA2, POLD1, TIPIN, RFC4, ORC3, POLE4, RFC3, MCM2	Improvers	Shared
GO_RESPONSE_TO_MOLECULE_OF_BACTERIAL_ORIGIN	0.00014574	0.00328819	0.518848	-0.410305	-1.61458	174	THBD, CSF3, CCR7, SERPINE1, AKAP12, IL1B, BMP6, ZFP36, EDNRB, IL24, IL6, PPARD, PDE4B, S100A8, SELE, NFKBIA, TNFAIP3, SBNO2, CSF2RB, PTGIR, SMAD6, TNFRSF11A, IDO1, HAMP, ABCC2, MEF2C, CEBPB, MYD88, IRAK1, PRPF8, NR1D1, PLAA, CXCL5, SPON2, NFKB1, AXL, FOS, KMO, ANKRD1, RELA, CCL2, RARA, AKT1, PTGFR, ZC3H12A, AKAP8, NOTCH1, IRAK3, TNF, ABL1	Improvers	Unique
GO_POSITIVE_REGULATION_OF_CELLULAR_COMPONENT_MOVEMENT	0.000148639	0.0033293	0.518848	-0.355289	-1.5138	347	FGF2, TEK, NRP2, CCR7, SERPINE1, AKAP12, IL1B, S1PR1, HGF, CAV1, FGFBP1, SNAI1, SEMA7A, IL6, INS, KDR, ETS1, HBEGF, FOXF1, SNAI2, SELE, ITGA5, SH3RF2, PODXL, CCL7, PLVAP, PLPP3, ITGA2, TWIST2, PDGFB, SPHK1, SPOCK2, DIAPH1, IL1R1, MYADM, PFN1, SEMA3F, CDH5, ANXA3, ILK, BMP2, FLT1, HSPB1, PDPN, S100A11, THBS1, JCAD, STAT5A, CXCR4, RPS19, SPRY2, RAPGEF2, MAPRE1, RACK1, SEMA3C, PLAA, ROCK2, ANO6, NED…	Improvers	Unique
GO_RESPONSE_TO_WOUNDING	0.000156767	0.00343825	0.518848	-0.341109	-1.45906	371	F2RL3, FGF2, THBD, SERPINE1, ZFP36, GPR4, EHD1, IL24, TRPC6, CAV1, GAP43, ACVRL1, IL6, INS, KDR, ETS1, SLC1A3, PPARD, S100A8, HBEGF, VCL, FOXF1, ITGA5, TFPI2, TNFAIP3, ELK3, TNFRSF12A, PLPP3, ITGA2, PEAR1, MYH9, EHD2, PDGFB, VWF, ACTB, TYRO3, DST, REG1A, ANXA2, ILK, HSPB1, CAPZB, PDPN, THBS1, LCP2, CXCR4, FGB, NRG1, DGKG, CSRP1, F12, ANXA5, CREB3L2, ANO6, RANGAP1, GNA15, TGFBR2, PHB2, DOCK9, F3, …	Improvers	Shared
GO_REGULATION_OF_TRANSCRIPTION_FROM_RNA_POLYMERASE_II_PROMOTER_IN_RESPONSE_TO_HYPOXIA	0.000157953	0.00343825	0.518848	-0.61434	-1.92765	41	PSMC3, PSME2, PSMD14, PSMD7, PSMD4, PSMB7, PSMD3, PSMB3, PSMB6, PSMC5, PSMB5, PSMC2, EPAS1, RPS27A, PSMD6, RBX1, UBC, NOTCH1, UBA52	Improvers	Shared
GO_REGULATION_OF_DNA_TEMPLATED_TRANSCRIPTION_IN_RESPONSE_TO_STRESS	0.000162449	0.00351141	0.518848	-0.521908	-1.80175	71	PSMC3, PSME2, PSMD14, PSMD7, PSMD4, PSMB7, PSMD3, PSMB3, PSMB6, PSMC5, PSMB5, PSMC2, BAG3, EPAS1, RPS27A, GCN1, CEBPB, INO80, PSMD6, RBX1, SIN3A, RELA, UBC, NOTCH1, UBA52, HSPA5	Improvers	Shared
GO_HEART_DEVELOPMENT	0.0001656	0.00355465	0.518848	-0.350432	-1.47979	314	FGF2, CALCRL, TEK, NRP2, S1PR1, OXTR, ADAMTS9, SNAI1, ACVRL1, ENG, PRDM1, PPARD, FOXF1, SNAI2, APLNR, TNFRSF1A, CDKN1A, FHL2, PDGFB, SLIT3, SMAD6, ID1, LMNA, TBX2, PDLIM4, TBX3, PDLIM7, CSRP3, HAMP, GLI2, JARID2, DUSP6, ILK, BMP2, NDRG4, EFNB2, EMILIN1, MIR17HG, MICAL2, MEF2C, SMAD7, CAD, NRG1, TCF25, SEMA3C, ROCK2, TMEM100, BCOR, TGFBR2, IFT57, G6PD, GJC1, SNX17, NOTCH2, ANKRD1, POFUT1, RARA, PA…	Improvers	Unique
GO_EPITHELIAL_CELL_PROLIFERATION	0.000178233	0.00379944	0.518848	-0.382353	-1.55923	238	FGF2, TEK, NRP2, BMP6, ZFP36, SFN, EDNRB, HGF, CAV1, FGFBP1, ACVRL1, NLRC3, IL6, KDR, MYC, PPARD, SNAI2, MYDGF, TNFAIP3, RGCC, APLNR, SERPINB1, PDGFB, ID1, EPHA2, REG1A, CCND1, BMP2, FLT1, THBS1, JCAD, STAT5A, EFNB2, SFRP1, MEF2C, CEBPB, WDR77, SDR16C5, NR1D1, GHRL, RPTOR, UHRF1, IFT57, PHB2, F3, HRAS	Improvers	Unique
GO_OSSIFICATION	0.000180533	0.0038221	0.518848	-0.392728	-1.57919	208	TEK, S1PR1, BMP6, HGF, JUNB, SNAI1, SEMA7A, IL6, SNAI2, STC1, SBNO2, TWIST2, FHL2, ALYREF, GTPBP4, SMAD6, ID1, TNFRSF11A, PDLIM7, EPHA2, GLI2, ILK, BMP2, RUNX2, PSMC2, ISG15, KLF10, CHRDL1, SND1, SFRP1, BMP8B, RFLNB, CHSY1, MEF2C, SMAD7, CEBPB, RUNX1, ENPP1, ANO6, BCOR, RFLNA, EXT1, RPS15, PTK2B, FSTL3, CDH11, TUFT1, RSL1D1, SYNCRIP, AKT1, DHX9, LRP4, XYLT1, NOTCH1, RRAS2, TNF	Improvers	Shared
GO_VASCULOGENESIS	0.000190051	0.00396924	0.518848	-0.595712	-1.88489	42	CAV1, JUNB, ENG, KDR, FOXF1, TIE1, APLNR, EPHA2, RAPGEF2, TMEM100, TGFBR2, RRAS, GJC1, ZFP36L1, NOTCH1	Improvers	Unique
GO_ESTABLISHMENT_OF_PROTEIN_LOCALIZATION_TO_MEMBRANE	0.000194331	0.0040314	0.518848	-0.38874	-1.56577	211	SFN, PDCD5, RPL35, RPS9, RPL41, RPS5, RPL10, KRT18, SSR3, RPL27, RPS21, RPL28, RPS27A, RPS7, RPLP0, RPLP2, RPS12, PEX5, RPS19, RAB34, RPL21, RACK1, VAMP5, RPL17, RPS29, ROMO1, RPL29, RAB11B, RPS4Y1, SYNE3, PARD3, RPL9, RPL37A, RPL12, TP53BP2, RPS15, RPL13, HRAS, RPL39, INPP5K, AP3B1, RPL36, RPL24, YIF1B, RPS14, RPS3, SGTA, RPL7, RPS11, GORASP2, RPL11, RPL30, MTCL1, UBA52, RPS4X, HSPA5, RFTN1, YWH…	Improvers	Shared
GO_POSITIVE_REGULATION_OF_ENDOTHELIAL_CELL_PROLIFERATION	0.000220581	0.00454543	0.518848	-0.534239	-1.8089	63	FGF2, TEK, NRP2, BMP6, FGFBP1, ACVRL1, KDR, MYDGF, APLNR, PDGFB, BMP2, JCAD, STAT5A, GHRL, RPTOR, F3	Improvers	Unique
GO_EXTRACELLULAR_STRUCTURE_ORGANIZATION	0.00022607	0.00462769	0.518848	-0.393961	-1.57846	199	FGF2, LAMA4, MMP1, SERPINE1, TLL1, CAV1, ADAMTS9, ENG, COL5A3, IL6, ADAMTS4, KDR, ETS1, FOXF1, LAMC3, ITGA5, ITGA10, RGCC, TNFRSF1A, LAMA3, PRSS2, ABI3BP, ITGA2, CTRB2, PDGFB, SPOCK2, VWF, BCL3, ANXA2, PRSS1, HAS3, PDPN, THBS1, EMILIN1, CDH1, FGB, CTSL, COL17A1, CRISPLD2, CCDC80, VCAM1, COL22A1	Improvers	Unique
GO_IN_UTERO_EMBRYONIC_DEVELOPMENT	0.000236126	0.00478971	0.518848	-0.380498	-1.54603	229	SOCS3, KPNA7, LIF, FOSL1, JUNB, PSMC3, SNAI1, ACVRL1, PRDM1, FOXF1, TIE1, MYH9, PDGFB, SEC24D, TBX3, PHLDA2, TM4SF1, GLI2, BMP2, WDR74, KRT19, EPAS1, PELO, COPS3, CEBPB, SLC34A2, ZPR1, NSUN2, ACTL6A, TMEM100, MSH2, B9D1, BCOR, TGFBR2, RRP7A, INPP5K, GNA12, NOTCH2, SIN3A, BCL2L1, RBBP8, HCFC1, AKT1, TRIM28, ZFP36L1, NOTCH1, ITGB1, MGAT1, PDGFRA, SMPD4, JAG2, ADA, YBX1, PCDH12, WNT7B	Improvers	Shared
GO_REGULATION_OF_PROTEIN_LOCALIZATION_TO_NUCLEUS	0.000237084	0.00478971	0.518848	-0.511034	-1.79082	76	LIF, INS, PKIG, LMNA, DTX3L, RAN, DKC1, PARP1, BAG3, NUTF2, CDH1, ZPR1, NOLC1, RASSF5, CCT2, CCT6A, SUMO3, CCT7, MCRS1, CCT3, SIN3A, AKT1, TRIM28, ZC3H12A, NUP62	Improvers	Shared
GO_GLOBAL_GENOME_NUCLEOTIDE_EXCISION_REPAIR	0.000243329	0.00487863	0.518848	-0.738633	-1.94015	19	CETN2, ERCC1, PARP1, RPS27A, DDB1, RBX1, GTF2H2, GTF2H3, UBC, UBA52	Improvers	Unique
GO_MESENCHYME_MORPHOGENESIS	0.000246016	0.00487863	0.498493	-0.682217	-1.9572	27	SNAI1, ACVRL1, ENG, MYC, FOXF1, SNAI2, TBX2, ACTA2, BMP2, TMEM100, TGFBR2	Improvers	Unique
GO_IMPORT_INTO_NUCLEUS	0.000246396	0.00487863	0.498493	-0.473706	-1.76589	105	KPNA7, NFKBIA, PKIG, CDKN1A, SNRPB, HNRNPA1, LMNA, NUP107, RAN, SNRPD1, GEMIN4, BAG3, NUP35, SNRPD2, NUP188, NUTF2, NUP93, CDH1, NXT1, KPNA1, ZPR1, NOLC1, PHB2, AKT1, TRIM28, ZC3H12A, STAT3, NUP62, NUP62CL, GEMIN5, PRKAG1, GEMIN2, KPNB1, GEMIN7, ECT2, BACH2, APOD, POM121, TP53, IPO9	Improvers	Shared
GO_RESPONSE_TO_RADIATION	0.000247798	0.00487863	0.498493	-0.368547	-1.5164	259	THBD, MYC, SLC1A3, SNAI2, CCL7, FEN1, CDKN1A, PLK3, ANGPT2, BCL3, TNFRSF11A, ERCC1, HAMP, RUVBL2, CCND1, EIF2S1, PARP1, NDRG4, SMC1A, BEST1, SFRP1, XRCC6, COPS3, B4GALT2, INO80, NOC2L, ASIC2, METAP2, POLD1, TIPIN, MSH2, DDB1, TXN, NABP1, LRRN4, UIMC1, PITPNM1, CIRBP, HRAS, SDE2, HMGCS1, NABP2, FOS, BCL2L1, RELA, ATP8A2, FBXL6, GTF2H2, AKT1, XRCC5, TMEM109, ATR, ITGB1, BHLHE40, WRN, HSPA5, FBXL8	Improvers	Unique
GO_POSTREPLICATION_REPAIR	0.000251925	0.00492848	0.498493	-0.614489	-1.89699	37	UFD1, ISG15, RPS27A, POLD2, RPA2, POLD1, MSH2, RFC4, NPLOC4, UBE2N, UBC, MAD2L2, UBA52, USP10, NSMCE1, RFC3, RAD18, RFC5, TRIM25, PARP10	Improvers	Shared
GO_CLEAVAGE_INVOLVED_IN_RRNA_PROCESSING	0.000263847	0.00512925	0.498493	-0.771289	-1.93372	16	BMS1, EXOSC2, NHP2, NOP14, TSR1, RPS21, EXOSC8, KRI1, ABT1, ERI1, RPP40	Improvers	Shared
GO_WOUND_HEALING	0.000271359	0.00520975	0.498493	-0.358199	-1.5063	298	F2RL3, FGF2, THBD, SERPINE1, GPR4, EHD1, IL24, TRPC6, CAV1, ACVRL1, IL6, INS, KDR, ETS1, PPARD, S100A8, HBEGF, VCL, ITGA5, TFPI2, TNFAIP3, ELK3, TNFRSF12A, PLPP3, ITGA2, PEAR1, MYH9, EHD2, PDGFB, VWF, ACTB, TYRO3, DST, REG1A, ANXA2, ILK, HSPB1, CAPZB, PDPN, THBS1, LCP2, CXCR4, FGB, NRG1, DGKG, CSRP1, F12, ANXA5, ANO6, GNA15, TGFBR2, DOCK9, F3, HRAS, AP3B1, GNA12, AXL, FIBP	Improvers	Shared
GO_MITOCHONDRIAL_TRANSLATIONAL_TERMINATION	0.000277389	0.00529265	0.498493	-0.512656	-1.76465	68	MRPL3, DAP3, AURKAIP1, MRPL54, MRPL52, MRPS28, MRPL27, MRPL4, MRPS7, MRPS22, MRPS12, MRPS23, ERAL1, MRPL58, MRRF, MRPL15, MRPL47, MRPS16, MRPL11, MRPL23, MRPS14, MRPL22, MRPL21, MRPS34, MRPS10, MRPL40, MRPS15, MRPS21, MRPL17, MRPS2, MRPL10, MRPL2, MRPL16, MRPL41, MRPL32, MRPL18, MRPS26, MRPL13, MRPL12, OXA1L, MRPL55, MRPS31	Improvers	Shared
GO_RESPONSE_TO_X_RAY	0.000280839	0.00529314	0.498493	-0.708066	-1.96507	23	THBD, CDKN1A, ERCC1, HAMP, CCND1, SFRP1, XRCC6, MSH2, XRCC5	Improvers	Unique
GO_SPROUTING_ANGIOGENESIS	0.000280839	0.00529314	0.498493	-0.5109	-1.76375	71	FGF2, TEK, FGFBP1, ADAMTS9, ACVRL1, KDR, ITGA5, APLNR, CLEC14A, EPHA2, ESM1, THBS1, JCAD, EFNB2, GHRL, PTK2B, AKT1, BMPER, PARVA, NOTCH1, ITGB1, ABL1, AGTR1, STARD13	Improvers	Shared
GO_RNA_MODIFICATION	0.000290557	0.0054431	0.498493	-0.451712	-1.70326	116	FTSJ1, QTRT2, DKC1, NHP2, DIMT1, TRMT6, CTU2, PUS7, APOBEC2, NSUN2, TGS1, URM1, TRMT1, ALKBH3, CDK5RAP1, NAT10, METTL16, THG1L, PUSL1, THADA, RBM15B, NSUN5, TPRKB, FTO, TRUB2, PCIF1, SSB, TRMT112, QTRT1, ELP3, ALKBH8, CDKAL1, ADAR, OSGEP, TSR3, TFB2M, RPUSD1, RPUSD3, RPUSD2	Improvers	Shared
GO_CELLULAR_RESPONSE_TO_BIOTIC_STIMULUS	0.000293516	0.0054654	0.498493	-0.453311	-1.71016	117	CSF3, SERPINE1, IL1B, BMP6, ZFP36, EDNRB, IL24, IL6, PPARD, PDE4B, NFKBIA, TNFAIP3, SBNO2, HAMP, ABCC2, SMC1A, MEF2C, CEBPB, MYD88, IRAK1, PRPF8, NR1D1, PLAA, CXCL5, SPON2, NFKB1, AXL, KMO, ANKRD1, RELA, CCL2, RARA, AKT1, ZC3H12A, AKAP8, TNF, ABL1, HSPA5	Improvers	Unique
GO_LEUKOCYTE_DIFFERENTIATION	0.000311726	0.00576972	0.498493	-0.359885	-1.49547	268	CSF3, PNP, CCR7, LIF, IL1B, IL11, JUNB, PRDM1, IL6, MYC, NKX2-3, RSAD2, RELB, CLCF1, SBNO2, GPR183, MYH9, NCAPH2, CD79A, BCL3, TNFRSF11A, TYRO3, EPHA2, INHBA, GLI2, ANXA2, PARP1, JAK3, RUNX2, KLF10, STAT5B, SFRP1, XRCC6, MIR17HG, MEF2C, SMAD7, CEBPB, RIPK3, CTSL, IL7R, RUNX1, VCAM1, PTPN2, TESC, SART1, NFATC2, TCF7, MSH2, MT1G, IRF7, TGFBR2, PTK2B, FSTL3, LFNG, RRAS, AP3B1, TUSC2, AXL, FOS, NOTCH…	Improvers	Unique
GO_ENDOCARDIAL_CUSHION_DEVELOPMENT	0.00031737	0.00583924	0.498493	-0.706604	-1.96101	23	SNAI1, ACVRL1, ENG, FOXF1, SNAI2, TBX2, BMP2, TMEM100, TGFBR2	Improvers	Unique
GO_REGULATION_OF_CELL_CYCLE_PHASE_TRANSITION	0.000324554	0.00593607	0.498493	-0.357361	-1.48199	276	SFN, TUBB, PSMC3, TUBB4B, RGCC, PSME2, PSMD14, CDKN1A, PSMD7, PSMD4, APEX1, PSMB7, PLK3, PSMD3, PSMB3, CETN2, PSMB6, EIF4G1, PSMC5, PSMB5, TUBA1A, CCND1, XRCC3, PSMC2, CDK2AP2, E2F4, CDC7, INO80, PSMD6, RPA2, MAPRE1, BTG2, CDC6, CDK2, RPTOR, BRD4, ACTR1A, DDB1, CNOT9, UIMC1, PHB2, RBX1, CTDSP2, DYRK3, ANAPC1, SIN3A, CCL2, SSNA1, AKT1, SDCCAG8, PAGR1, ZFP36L1, CLSPN, MAD2L2, KNTC1, YWHAE, PPP1R9B,…	Improvers	Shared
GO_REGULATION_OF_ACUTE_INFLAMMATORY_RESPONSE	0.000333756	0.00600037	0.498493	-0.714419	-1.9617	22	CCR7, IL1B, EDNRB, IL6, INS, TNFRSF11A, OSMR, F12, RHBDD3, C2CD4A, ADCYAP1, TNF, HLA-E	Improvers	Unique
GO_REGULATION_OF_EPITHELIAL_CELL_MIGRATION	0.000333893	0.00600037	0.498493	-0.423315	-1.63222	148	FGF2, TEK, NRP2, FGFBP1, ADAMTS9, ACVRL1, KDR, ETS1, HBEGF, STC1, RGCC, PLPP3, ITGA2, PDGFB, ANGPT2, PFN1, EPHA2, ANXA3, HSPB1, THBS1, JCAD, STAT5A, MEF2C, ARSB, ROCK2, MAP4K4, TGFBR2, PTK2B, RRAS, AAMP, AKT1, BMPER, ZC3H12A, APOH, NOTCH1, TNF, ABL1, STARD13, MACF1, FGF7, ATP2B4, DLL4, TACSTD2, STRAP, GADD45A, AMOTL1, MTOR	Improvers	Unique
GO_MESENCHYME_DEVELOPMENT	0.000343233	0.00613256	0.498493	-0.422983	-1.63094	148	NRP2, IL1B, EDNRB, HGF, SNAI1, SEMA7A, ACVRL1, ENG, IL6, MYC, FOXF1, SNAI2, RGCC, TBX2, SEMA3F, ACTA2, BMP2, HNRNPAB, PDPN, TCOF1, SFRP1, RFLNB, MEF2C, SMAD7, SPRY2, NRG1, NOLC1, SEMA3C, PEF1, TMEM100, TGFBR2, TGFB1I1, CFL1	Improvers	Unique
GO_GENE_SILENCING	0.00034862	0.00619301	0.498493	-0.433062	-1.65158	132	ZFP36, IL6, HMGA1, HAT1, MIR22HG, NUP107, EIF4G1, DNMT1, RAN, EIF6, NUP205, SRRT, NUP35, SND1, NUP188, XPO5, NUP93, MIR17HG, MIRLET7BHG, CDK2, CARMN, CNOT9, MIR3142HG, DGCR8, POLR2G, SIN3A, MORF4L2, ERI1, DHX9, ZC3H12A, KMT2D, AC020916.1, NUP37, TNF, STAT3, NUP62	Improvers	Shared
GO_DNA_CONFORMATION_CHANGE	0.000369196	0.00652106	0.498493	-0.40365	-1.58777	170	HMGA1, GRWD1, MCM5, HAT1, NCAPH2, CETN2, DNMT1, MCM4, RUVBL2, PARP1, TWNK, RPS27A, XRCC6, NOC2L, CENPX, ASCC3, RFC4, DDB1, RBX1, BEND3, DAXX, GTF2H2, CHTF18, DHX9, XRCC5, TRIM28, GTF2H3, UBC, FANCM, AKAP8, CHAF1A, UBA52, ABL1, WRN, SUV39H1, MBD2, BRD2, GTF2F2, SRPK1, RAD54L2, RFC3, MCM2, RECQL, INCENP, NBN, HNRNPA2B1, MNAT1, CENPH, RAD18, MCPH1, RFC5, KAT6A, TP53, PARP10, ANP32B, SETDB1, ANXA1, R…	Improvers	Shared
GO_POSITIVE_REGULATION_OF_GROWTH	0.00039927	0.00699855	0.498493	-0.414573	-1.59714	147	FGF2, SFN, SEMA7A, INS, PPARD, S100A8, HBEGF, FOXS1, TNFRSF12A, PRSS2, SPHK1, TBX2, EIF4G1, EXOSC2, HAMP, REG1A, ILK, EXOSC4, STAT5B, SFRP1, CXCR4, MIR17HG, MEF2C, SMAD7, INO80, ZPR1, GHRL, PLAA, TRPV2, RPTOR, TGFBR2, PTK2B, KRT17, ATP8A2, TWF2, AKT1	Improvers	Unique
GO_DNA_TEMPLATED_TRANSCRIPTION_ELONGATION	0.000402808	0.00699855	0.498493	-0.496851	-1.74111	76	NELFE, ALYREF, POLR1E, SSRP1, MLLT1, NELFCD, CCNH, TAF1B, BRD4, TCERG1, POLR2G, GTF2F1, GTF2H2, WDR61, ELOA, GTF2H3, POLR1C, THOC5, ELOF1, POLR1B, GTF2F2, TAF1D, SUPT16H, IWS1, MNAT1, ELOC, CTDP1, EZH2, CDK7, POLR2B, SUPT6H, CDK12, POLR2F, POLR2A, HNRNPU, ERCC3, NELFB, CTR9	Improvers	Shared
GO_POSITIVE_REGULATION_OF_BLOOD_VESSEL_ENDOTHELIAL_CELL_MIGRATION	0.000403022	0.00699855	0.498493	-0.603059	-1.84922	36	FGF2, FGFBP1, KDR, ETS1, PDGFB, HSPB1, THBS1, JCAD, STAT5A	Improvers	Shared
GO_NEGATIVE_REGULATION_OF_MITOTIC_CELL_CYCLE	0.000410298	0.00703635	0.498493	-0.39222	-1.56324	195	SFN, PSMC3, RGCC, PSME2, PSMD14, CDKN1A, PSMD7, PSMD4, PSMB7, PLK3, PSMD3, PSMB3, PSMB6, PSMC5, PSMB5, BTG3, CCND1, XRCC3, WNT9A, PSMC2, CDK2AP2, E2F4, PSMD6, RPA2, BTG2, CDC6, CDK2, AURKAIP1, TIPIN, MSH2, CNOT9, NABP1, HRAS, RBX1, CTDSP2, NABP2, BCL2L1, CCL2, ZFP36L1, CLSPN, MAD2L2, TNF, ABL1, KNTC1, IK, MTBP, WEE1, PRCC, NBN, CNOT1, GADD45A, CDKN1C, EZH2, MCPH1, ZWINT, PSMB9, TRIP13, ZNF207, DD…	Improvers	Shared
GO_NUCLEOTIDE_EXCISION_REPAIR_PREINCISION_COMPLEX_ASSEMBLY	0.000410785	0.00703635	0.498493	-0.715327	-1.93682	21	CETN2, PARP1, RPS27A, RPA2, CCNH, DDB1, RBX1, GTF2H2, GTF2H3, UBC, UBA52, MNAT1, ERCC5, CDK7	Improvers	Unique
GO_MYELOID_LEUKOCYTE_DIFFERENTIATION	0.000412028	0.00703635	0.498493	-0.461887	-1.7157	102	CSF3, CCR7, LIF, JUNB, MYC, NKX2-3, RELB, SBNO2, GPR183, MYH9, TNFRSF11A, EPHA2, INHBA, ANXA2, PARP1, KLF10, SFRP1, MEF2C, CEBPB, RUNX1, PTPN2, TESC, MT1G, IRF7, TGFBR2, FSTL3, FOS, NOTCH2, PIAS3, RARA, ZFP36L1, FADD, THOC5, TNF, JAGN1	Improvers	Unique
GO_NEGATIVE_REGULATION_OF_EXTRINSIC_APOPTOTIC_SIGNALING_PATHWAY_VIA_DEATH_DOMAIN_RECEPTORS	0.000414456	0.00703891	0.498493	-0.628718	-1.89688	33	SERPINE1, HGF, TNFAIP3, ITPRIP, FGB, FAS, ARHGEF2, TNFRSF10A, BCL2L1, FADD, RAF1, TRAF2, PEA15, RFFL, HMOX1, RIPK1	Improvers	Unique
GO_CYTOPLASMIC_TRANSLATION	0.00041952	0.00707783	0.498493	-0.517976	-1.77364	66	FTSJ1, RPL41, EIF3B, EIF4G1, EIF2B3, GSPT1, EIF4EBP1, RPS21, RPLP0, EIF3G, RPL17, RPS29, RPL29, CNBP, ETF1, RPL9, EIF3D, EIF3K, RPL39, RPL36, RPL24, EIF4A1, DHX9, EIF5, RPL11, RPL30, RPS26, EIF4H, RPL6, EIF3A, RPL31, MTOR	Improvers	Shared
GO_CELLULAR_RESPONSE_TO_OXYGEN_LEVELS	0.000421751	0.00707783	0.498493	-0.431444	-1.65673	140	TRPC6, CAV1, PSMC3, MYC, PPARD, STC1, RGCC, PSME2, PSMD14, PSMD7, PSMD4, PSMB7, PLK3, PSMD3, PSMB3, LMNA, PSMB6, PSMC5, PSMB5, EIF4EBP1, PSMC2, EPAS1, CHCHD2, SFRP1, RPS27A, PSMD6, IRAK1, HYOU1, TBL2, FAS, ROCK2, PHB2, RBX1, KCNK3, ANKRD1, SUV39H2, AKT1, ZFP36L1, UBC, AQP3, NOTCH1, UBA52, SUV39H1	Improvers	Shared
GO_RECEPTOR_SIGNALING_PATHWAY_VIA_STAT	0.000459855	0.00757597	0.498493	-0.495835	-1.73496	75	SOCS3, LIF, TSLP, IL24, CAV1, IL6, TNFRSF1A, CLCF1, BCL3, JAK3, SOCS2, STAT5B, STAT5A, IL7R, PWP1, PTPN2, PTK2B, NMI, PARP14, CCL2, NOTCH1, TNF, STAT3	Improvers	Unique
GO_PROTEIN_IMPORT	0.000460784	0.00757597	0.498493	-0.440852	-1.68015	124	KPNA7, NFKBIA, PKIG, CDKN1A, PDCD5, LMNA, NUP107, RAN, TOMM40, BAG3, NUP35, NUP188, NUTF2, NUP93, CDH1, NXT1, TIMM23, PEX5, KPNA1, ZPR1, NOLC1, ROMO1, PHB2, TIMM50, TIMM23B, PEX10, AKT1, TRIM28, ZC3H12A, STAT3, TIMM17B, NUP62, NUP62CL	Improvers	Shared
GO_CELL_SUBSTRATE_JUNCTION_ORGANIZATION	0.000476509	0.00771611	0.498493	-0.491435	-1.72213	76	TEK, ACVRL1, KDR, VCL, ITGA5, LAMA3, FERMT2, ITGA2, ARHGAP6, DST, THBS1, SFRP1, COL17A1, ROCK2, MAP4K4, ITGA6, PTK2B, DAPK3	Improvers	Shared
GO_REGULATION_OF_CELL_CYCLE_PROCESS	0.000477477	0.00771611	0.498493	-0.320518	-1.40052	453	LIF, IL1B, SFN, TUBB, PSMC3, TUBB4B, INS, RGCC, PSME2, FEN1, PSMD14, CDKN1A, PSMD7, PSMD4, APEX1, PSMB7, PLK3, PSMD3, PDGFB, SPHK1, PSMB3, CETN2, PRMT5, PSMB6, EIF4G1, PSMC5, PSMB5, TUBA1A, CCND1, XRCC3, PSMC2, SND1, CDK2AP2, SFRP1, E2F4, CDC7, MAP10, INO80, PSMD6, RPA2, MAPRE1, MYO19, BTG2, CDC6, CDK2, AURKAIP1, ROCK2, ZBTB17, TIPIN, RPTOR, BRD4, ACTR1A, DDB1, CNOT9, UIMC1, UXT, PHB2, RBX1, CTDS…	Improvers	Shared
GO_TRANSLESION_SYNTHESIS	0.000480397	0.00771611	0.498493	-0.648162	-1.86701	29	UFD1, ISG15, RPS27A, POLD2, RPA2, POLD1, RFC4, NPLOC4, UBC, MAD2L2, UBA52, USP10, RFC3, RFC5, TRIM25, PARP10	Improvers	Shared
GO_HEMATOPOIETIC_PROGENITOR_CELL_DIFFERENTIATION	0.000481391	0.00771611	0.498493	-0.472273	-1.70946	92	PSMC3, KDR, PSME2, PSMD14, PSMD7, PSMD4, PSMB7, PSMD3, PSMB3, PSMB6, PSMC5, PSMB5, INHBA, FLT1, PSMC2, SFRP1, PSMD6, RUNX1, PUS7, ARMC6, FSTL3, FST, HOXB4, SIN3A, XRCC5, NOTCH1, ABL1, LMO1, PDGFRA, PRRC2C, ADAR	Improvers	Shared
GO_POSITIVE_REGULATION_OF_CHROMOSOME_ORGANIZATION	0.000501216	0.00792164	0.477271	-0.442429	-1.66825	116	KPNA7, LIF, IL1B, SNAI2, GNL3, FEN1, NELFE, HNRNPA1, LMNA, DNMT1, ERCC1, DKC1, RUVBL2, JARID2, SDR16C5, RPS6KA4, CCT2, BRD4, CCT6A, CCT7, SMC5, NABP2, CCT3, SIN3A, UBE2N, GTF2H2, XRCC5, TRIM28, WDR61, AKAP8, ATR	Improvers	Unique
GO_CELLULAR_KETONE_METABOLIC_PROCESS	0.000502228	0.00792164	0.477271	-0.430253	-1.65327	138	IL1B, ERFE, BMP6, CAV1, PSMC3, INS, PPARD, FABP5, PSME2, PSMD14, PSMD7, PSMD4, PSMB7, PSMD3, PSMB3, PSMB6, PSMC5, PSMB5, IDO1, EIF6, BMP2, PSMC2, DHRS9, STAT5B, PSMD6	Improvers	Unique
GO_HEART_VALVE_DEVELOPMENT	0.00050231	0.00792164	0.477271	-0.59829	-1.8346	36	ADAMTS9, SNAI1, PRDM1, SNAI2, TNFRSF1A, SLIT3, SMAD6, BMP2, EMILIN1, MEF2C, ROCK2, TGFBR2, NOTCH2, NOTCH1, PDE2A, DLL4	Improvers	Unique
GO_REGULATION_OF_ENDOTHELIAL_CELL_DIFFERENTIATION	0.000525626	0.00824725	0.477271	-0.721738	-1.89578	19	IL1B, BMP6, ACVRL1, VCL, TNFRSF1A, ID1, CDH5, ROCK2, TMEM100, NOTCH1, TNF	Improvers	Unique
GO_PROTEIN_CONTAINING_COMPLEX_DISASSEMBLY	0.00053419	0.0083393	0.477271	-0.378179	-1.52068	208	NES, NAV3, CAV1, MYC, HMGA1, GRWD1, EIF5A, LMOD1, JMJD4, MRPL3, GSPT1, CAPZB, WDR1, MICAL2, TMOD1, FLII, KATNB1, DAP3, AURKAIP1, SH3GL1, MRPL54, ETF1, MRPL52, SPTBN2, ARHGEF2, MRPS28, CFL1, DYRK3, MRPL27, MRPL4, TWF2, MRPS7, MRPS22, IRAK3, DHX8, TNF, MRPS12, MRPS23, PPP1R9B, MAP1B, TRMT112, ERAL1, MRPL58, SVIL, TSG101, MRRF, MRPL15, DSTN, MRPL47, MRPS16, SUPT16H, MRPL11, ARID2, MRPL23, MRPS14, SM…	Improvers	Shared
GO_NUCLEOTIDE_EXCISION_REPAIR_DNA_DAMAGE_RECOGNITION	0.000540179	0.00839042	0.477271	-0.727146	-1.87703	18	CETN2, PARP1, COPS6, RPS27A, COPS3, DDB1, RBX1, UBC, COPS4, UBA52	Improvers	Unique
GO_NEGATIVE_REGULATION_OF_ENDOTHELIAL_CELL_APOPTOTIC_PROCESS	0.000549413	0.00849118	0.477271	-0.726413	-1.87514	18	TEK, SERPINE1, KDR, TNFAIP3, CDH5, FGB	Improvers	Unique
GO_DNA_SYNTHESIS_INVOLVED_IN_DNA_REPAIR	0.00057803	0.00880142	0.477271	-0.623916	-1.89753	34	UFD1, ISG15, RPS27A, POLD2, RPA2, POLA1, POLD1, RFC4, NPLOC4, UBC, MAD2L2, UBA52, WRN, USP10, RFC3, RFC5, TRIM25, PARP10, POLE	Improvers	Shared
GO_REGULATION_OF_PEPTIDYL_SERINE_PHOSPHORYLATION	0.000606041	0.00918272	0.477271	-0.488502	-1.71185	76	CSF3, LIF, IL11, HGF, CAV1, IL6, EIF4G1, FNIP2, SMAD7, SPRY2, RACK1, PWP1, BDKRB2, RPTOR, TXN, CNOT9, SH2D3A, INPP5K, RAMP3, AKT1, MAD2L2, ARAF, BCAR3, TNF, RAF1, ATP2B4, MAPKAP1	Improvers	Unique
GO_REGULATION_OF_NUCLEOCYTOPLASMIC_TRANSPORT	0.000619966	0.00934754	0.477271	-0.479823	-1.67661	74	IL1B, SFN, PKIG, RAN, PTPN14, BAG3, XPO5, NUTF2, CDH1, ZPR1, NOLC1, NSUN2, EMD, TXN, RANGAP1, DHX9, TRIM28, ZC3H12A, KHDRBS1, NUP62, CPSF6, MX2, YWHAE	Improvers	Unique
GO_ESTABLISHMENT_OF_TISSUE_POLARITY	0.000628697	0.00934754	0.477271	-0.506128	-1.74517	69	PSMC3, PSME2, PSMD14, PSMD7, PSMD4, PSMB7, PSMD3, PSMB3, PSMB6, PSMC5, PSMB5, PFN1, PSMC2, WDR1, SFRP1, PSMD6, AP2M1, AP2A1	Improvers	Shared
GO_INTERSTRAND_CROSS_LINK_REPAIR	0.000629016	0.00934754	0.477271	-0.629044	-1.82972	30	ERCC1, XRCC3, RPS27A, RPA2, CENPX, ATRIP, FANCE, UBC, FANCM, ATR, UBA52	Improvers	Unique
GO_RECOMBINATIONAL_REPAIR	0.000643051	0.00951038	0.477271	-0.48807	-1.71034	76	FEN1, PSMD14, MCM5, WRAP53, MCM4, FUS, XRCC3, PARP1, CDC7, INO80, RPA2, NABP1, SMC5, NABP2, UBE2N, RBBP8, MAD2L2, FANCM, WRN, NSMCE1, MCM2, RECQL, NBN, ARID2	Improvers	Unique
GO_CELLULAR_PROTEIN_COMPLEX_DISASSEMBLY	0.000648311	0.00954252	0.477271	-0.414514	-1.60319	151	NES, NAV3, EIF5A, LMOD1, JMJD4, MRPL3, GSPT1, CAPZB, WDR1, MICAL2, TMOD1, FLII, KATNB1, DAP3, AURKAIP1, SH3GL1, MRPL54, ETF1, MRPL52, SPTBN2, ARHGEF2, MRPS28, CFL1, MRPL27, MRPL4, TWF2, MRPS7, MRPS22, MRPS12, MRPS23, PPP1R9B, MAP1B, TRMT112, ERAL1, MRPL58, SVIL, MRRF, MRPL15, DSTN, MRPL47, MRPS16, MRPL11, MRPL23, MRPS14, MRPL22, MRPL21, MRPS34	Improvers	Shared
GO_NEGATIVE_REGULATION_OF_CELL_CYCLE_PHASE_TRANSITION	0.000661699	0.00969341	0.477271	-0.404033	-1.55654	147	SFN, PSMC3, RGCC, PSME2, PSMD14, CDKN1A, PSMD7, PSMD4, PSMB7, PLK3, PSMD3, PSMB3, PSMB6, PSMC5, PSMB5, CCND1, XRCC3, PSMC2, CDK2AP2, E2F4, PSMD6, RPA2, BTG2, CDC6, CDK2, CNOT9, UIMC1, RBX1, CTDSP2, CCL2, ZFP36L1, CLSPN, MAD2L2	Improvers	Shared
GO_CELLULAR_TRANSITION_METAL_ION_HOMEOSTASIS	0.000667868	0.00973764	0.477271	-0.526466	-1.77308	60	ERFE, BMP6, MT2A, MYC, S100A8, MT1X, SLC39A7, HAMP, GLRX3, FTL, SLC39A14, MT1G, HMOX2, NUBP1	Improvers	Unique
GO_NUCLEOTIDE_EXCISION_REPAIR_DNA_DUPLEX_UNWINDING	0.000699241	0.0101472	0.477271	-0.749002	-1.87784	16	CETN2, PARP1, RPS27A, DDB1, RBX1, GTF2H2, GTF2H3, UBC, UBA52	Improvers	Unique
GO_NEGATIVE_REGULATION_OF_INFLAMMATORY_RESPONSE	0.000716154	0.0103441	0.477271	-0.477136	-1.69359	79	CALCRL, TEK, SOCS3, HGF, LRFN5, NLRC3, INS, ETS1, PPARD, IL1R2, FOXF1, TNFAIP3, TNFRSF1A, NT5E, TYRO3, CDH5, RPS19, NR1D1, GHRL, PTPN2	Improvers	Unique
GO_POSITIVE_REGULATION_OF_EPITHELIAL_CELL_MIGRATION	0.000725691	0.0104331	0.477271	-0.456031	-1.68089	96	FGF2, TEK, NRP2, FGFBP1, KDR, ETS1, HBEGF, PLPP3, ITGA2, PDGFB, PFN1, ANXA3, HSPB1, THBS1, JCAD, STAT5A, ROCK2, MAP4K4, TGFBR2, PTK2B, RRAS, AAMP	Improvers	Shared
GO_MATERNAL_PLACENTA_DEVELOPMENT	0.000738832	0.0105728	0.477271	-0.685643	-1.90284	23	LIF, JUNB, PRDM1, PPARD, STC1, DAZAP1, GHRL	Improvers	Unique
GO_REGULATION_OF_PROTEIN_CONTAINING_COMPLEX_DISASSEMBLY	0.000746672	0.0106358	0.477271	-0.476921	-1.66647	74	NES, NAV3, EIF5A, LMOD1, JMJD4, GSPT1, CAPZB, WDR1, TMOD1, FLII, KATNB1, ETF1, SPTBN2, ARHGEF2, CFL1, TWF2, IRAK3, TNF, MAP1B, SVIL, DSTN	Improvers	Unique
GO_TRABECULA_MORPHOGENESIS	0.000752735	0.010673	0.477271	-0.675896	-1.90511	25	TEK, S1PR1, ENG, SBNO2, FHL2, SFRP1, NRG1	Improvers	Unique
GO_POSITIVE_REGULATION_OF_PEPTIDYL_SERINE_PHOSPHORYLATION	0.000757113	0.010686	0.477271	-0.549261	-1.76175	49	CSF3, LIF, IL11, CAV1, IL6, EIF4G1, FNIP2, SPRY2, RPTOR, TXN, CNOT9, SH2D3A, RAMP3, AKT1, MAD2L2, ARAF, BCAR3, TNF, RAF1, ATP2B4, MAPKAP1	Improvers	Unique
GO_REGULATION_OF_CELL_JUNCTION_ASSEMBLY	0.000769463	0.010811	0.477271	-0.431298	-1.64374	124	TEK, IL1B, OXTR, CAV1, GAP43, SNAI1, ACVRL1, LRFN5, KDR, VCL, SNAI2, ARHGAP6, EIF4G1, EPHA2, THBS1, SFRP1, ADGRB3, MEF2C, RUNX1, RAPGEF2, GHRL, ASIC2, ROCK2, MAP4K4	Improvers	Unique
GO_REGULATION_OF_ACTIN_CYTOSKELETON_REORGANIZATION	0.000780014	0.0108895	0.477271	-0.702367	-1.90173	21	TEK, CSF3, ARHGDIA, GMFG, PTK2B, HRAS, DAPK3, NOTCH2, ABL1, PDGFRA	Improvers	Unique
GO_PEPTIDYL_TYROSINE_MODIFICATION	0.000782103	0.0108895	0.477271	-0.378788	-1.51306	196	TEK, CSF3, SOCS3, LIF, TSLP, BMP6, IL11, IL24, HGF, CAV1, IL6, KDR, HBEGF, TIE1, ITGA5, TNFRSF1A, CLCF1, PDGFB, EHD4, TYRO3, EPHA2, JAK3, FLT1, SFRP1, NRG1, RACK1, GHRL, ALK, PTPN2, ALKAL2, NEDD9, AFAP1L2, ARHGEF2, PTK2B, DYRK3, AXL, PARP14, GPRC5B, IBTK, LRP4, DUSP22, TPST1, MVP, TNF, ROR1, STAT3, ABL1, ERRFI1, PDGFRA, DDR2, TSG101, SPINK1	Improvers	Unique
GO_MITOCHONDRIAL_GENE_EXPRESSION	0.000795501	0.0110264	0.477271	-0.43559	-1.64883	118	MPV17L2, MRPL3, TWNK, ELAC2, TBRG4, DAP3, AURKAIP1, MRPL54, CDK5RAP1, MRPL52, MRPS28, MRPL27, MRPL4, POLRMT, MRPS7, TUFM, NGRN, MRPS22, MRPS12, TRUB2, MRPS23, ERAL1, MRPL58, MRRF, MRPL15, MRPL47, MRPS16, MRPL11, GFM1, TFB2M, MRPL23, MRPS14, RPUSD3, MRPL22, SHMT2, MRPL21, MRPS34, MRPS10, MRPL40, MRPS15, MRPS21, MRPL17, MRPS2, RARS2, TRMT10B	Improvers	Shared
GO_PEPTIDYL_LYSINE_MODIFICATION	0.000822182	0.0113454	0.477271	-0.359853	-1.48142	258	KPNA7, LIF, IL1B, SNAI2, GNL3, NELFE, CPA4, HAT1, STX1A, LMNA, NUP107, DNMT1, NUP205, TGM2, RUVBL2, JARID2, NUP35, NUP188, NUP93, NOC2L, SDR16C5, RPS6KA4, PWP1, ACTL6A, SENP1, BAZ1A, BRD4, RANGAP1, BCOR, SUMO3, MCRS1, BEND3, EEF1AKMT3, SIN3A, RELA, SUV39H2, KANSL2, HCFC1, EEF1AKMT4, PIAS3, MORF4L2, PHF14, TRIM28, PAGR1, EHMT1, WDR61, TAF6, KAT8, EP400, KMT2D, NUP37, DOHH, TAF12, SUV39H1, NUP62, S…	Improvers	Unique
GO_FC_EPSILON_RECEPTOR_SIGNALING_PATHWAY	0.000852398	0.0117101	0.477271	-0.507635	-1.74325	67	PSMC3, PSME2, PSMD14, PSMD7, PSMD4, PSMB7, PSMD3, PSMB3, PSMB6, PSMC5, PSMB5, PSMC2, LCP2, PSMD6, IKBKG, NFATC2, NFKB1, FOS, RELA	Improvers	Shared
GO_REGULATION_OF_EXTRINSIC_APOPTOTIC_SIGNALING_PATHWAY_VIA_DEATH_DOMAIN_RECEPTORS	0.00086212	0.0117912	0.477271	-0.569708	-1.80141	43	SERPINE1, HGF, TNFAIP3, ITPRIP, THBS1, SFRP1, FGB, FAS, ARHGEF2, TNFRSF10A, BCL2L1, FADD, FAF1, STX4, RAF1, TRAF2, PEA15, RFFL, HMOX1	Improvers	Unique
GO_DNA_DAMAGE_RESPONSE_DETECTION_OF_DNA_DAMAGE	0.000867324	0.0118101	0.477271	-0.681071	-1.89015	23	PARP1, RPS27A, POLD2, RPA2, POLD1, RFC4, DDB1, RBX1, RPS3, UBC, UBA52, RFC3, RAD18, RFC5	Improvers	Unique
GO_TRNA_MODIFICATION	0.000889258	0.0120557	0.477271	-0.510165	-1.74393	65	FTSJ1, QTRT2, TRMT6, CTU2, PUS7, NSUN2, URM1, TRMT1, CDK5RAP1, NAT10, THG1L, PUSL1, THADA, TPRKB, SSB, TRMT112, QTRT1, ELP3, ALKBH8, CDKAL1, OSGEP	Improvers	Shared
GO_REGULATION_OF_CHROMOSOME_ORGANIZATION	0.000894857	0.0120786	0.477271	-0.368345	-1.49103	220	KPNA7, LIF, IL1B, MYC, SNAI2, GNL3, HMGA1, FEN1, NELFE, STN1, HNRNPA1, LMNA, DNMT1, ERCC1, SSRP1, DKC1, RUVBL2, XRCC3, JARID2, PARP1, NOC2L, SDR16C5, RPS6KA4, CDC6, CCT2, BRD4, BCOR, NAT10, CCT6A, CCT7, ANAPC1, SMC5, NABP2, CCT3, SIN3A, UBE2N, GTF2H2, XRCC5, SMG6, TRIM28, WDR61, MAD2L2, AKAP8, ATR, HDAC8, IK, HNRNPD, MCM2, THAP7, SLF1, SETD1A, NBN, IWS1, HNRNPA2B1, MNAT1, MCPH1, TRIP13, WDR5, ZNF…	Improvers	Shared
GO_REGULATION_OF_EXTRINSIC_APOPTOTIC_SIGNALING_PATHWAY	0.000907734	0.0121463	0.477271	-0.430166	-1.6135	112	SERPINE1, IL1B, HGF, CAV1, TRAF1, G0S2, SNAI2, TNFAIP3, ITPRIP, TNFRSF12A, LMNA, INHBA, THBS1, SFRP1, FGB, IFI6, FAS, ITGA6, ARHGEF2, TNFRSF10A, DAPK3, BCL2L1, RELA, AKT1, FADD, BCL2L12, FAF1, TNF	Improvers	Unique
GO_POSITIVE_REGULATION_OF_CYTOKINE_PRODUCTION	0.000924373	0.0123157	0.477271	-0.358847	-1.46337	238	IL1RL1, CCR7, SERPINE1, TSLP, AKAP12, IL1B, HGF, SEMA7A, IL6, INS, PDE4B, RSAD2, RGCC, IL33, NLRP1, SPHK1, IL1R1, BCL3, IDO1, PANX1, POLR3H, UFD1, HSPB1, GAPDH, SLC7A5, THBS1, LPL, XRCC6, DHX33, CEBPB, MYD88, RUNX1, IRAK1, POLR3D, ROCK2, PQBP1, SPON2, AFAP1L2, BIRC3, IRF7, ARHGEF2, POLR3E, PHB2, F3, HRAS, NFKB1, TUSC2, NPLOC4, GPRC5B, RELA, RPS3, RARA, DHX9, XRCC5, POLR3F, FADD, ZBTB20, DDX60, AD…	Improvers	Unique
GO_POSITIVE_REGULATION_OF_PRI_MIRNA_TRANSCRIPTION_BY_RNA_POLYMERASE_II	0.000955011	0.0126151	0.477271	-0.646819	-1.83221	26	FGF2, FOSL1, ETS1, GNL3, PDGFB, SMAD6, BMP2, FOS, RELA, TNF, STAT3	Improvers	Shared
GO_REGULATION_OF_POSTTRANSCRIPTIONAL_GENE_SILENCING	0.000990382	0.0129715	0.45506	-0.533846	-1.73869	53	ZFP36, IL6, NUP107, EIF4G1, NUP205, NUP35, NUP188, XPO5, NUP93, POLR2G, DHX9, ZC3H12A, NUP37, TNF, STAT3, NUP62, ADAR, DDX5, POLR2B, POM121, TP53, NUP50, POLR2F, RIPK1, POLR2A, MAP2K2	Improvers	Shared
GO_SCF_DEPENDENT_PROTEASOMAL_UBIQUITIN_DEPENDENT_PROTEIN_CATABOLIC_PROCESS	0.00100276	0.0129716	0.45506	-0.535482	-1.73163	52	PSMC3, PSME2, PSMD14, PSMD7, PSMD4, PSMB7, PSMD3, PSMB3, PSMB6, PSMC5, PSMB5, PSMC2, PSMD6	Improvers	Shared
GO_EPITHELIAL_CELL_DEVELOPMENT	0.00100717	0.0129716	0.45506	-0.415627	-1.58681	134	IL1B, BMP6, SFN, GPR4, ENG, PRDM1, VCL, CDSN, STC1, TNFRSF1A, PODXL, ROBO4, CDKN1A, PDGFB, ID1, MYADM, CDH5, EPHA2, ACTA2, CXCR4, E2F4, RAPGEF2, TMOD1, COL22A1, ROCK2, TJP2, LHFPL5, NOTCH2, FRMD6, RARA, BFSP1, NOTCH1, TNF, WHRN, AKR1B1, FOXJ1, WNT7B, PDE2A, RHEB	Improvers	Unique
GO_REGULATION_OF_PROTEIN_MODIFICATION_BY_SMALL_PROTEIN_CONJUGATION_OR_REMOVAL	0.001026	0.0131592	0.45506	-0.393654	-1.53468	162	CAV1, GNL3, TNFAIP3, SH3RF2, SPHK1, GTPBP4, AIMP2, DTX3L, ISG15, RPS7, SMAD7, CENPX, RASSF5, PLAA, PEF1, BIRC3, TNIP1, NMI, HUWE1, RBX1, VPS28, DAXX, UBE2N, RELA, RPS3, PIAS3, AKT1, RPL11, ZC3H12A, MAD2L2, NHLRC1, FANCM, ABL1, HDAC8, OTUD4, HSPA5, U2AF2, COMMD1, MTBP, STUB1, MTOR, GOLGA2, MYCBP2, UBE2I, PER2, EGR1, PIAS4, RNF4, PARP10, HMG20B, FEM1A, PDCD6, NOP53, TSPO, WDR70, FBXW7, UBR5, PRKCE	Improvers	Shared
GO_ENDOCARDIAL_CUSHION_MORPHOGENESIS	0.00103807	0.013259	0.45506	-0.703807	-1.84868	19	SNAI1, ACVRL1, ENG, SNAI2, TBX2, BMP2, TMEM100, TGFBR2	Improvers	Unique
GO_OSTEOBLAST_DIFFERENTIATION	0.00104646	0.0133111	0.45506	-0.425242	-1.60037	115	BMP6, HGF, JUNB, SNAI1, SEMA7A, IL6, SNAI2, TWIST2, FHL2, ALYREF, GTPBP4, SMAD6, ID1, PDLIM7, EPHA2, GLI2, ILK, BMP2, RUNX2, PSMC2, SND1, SFRP1, MEF2C, CEBPB	Improvers	Unique
GO_TYROSINE_PHOSPHORYLATION_OF_STAT_PROTEIN	0.00106752	0.0135233	0.45506	-0.593227	-1.81409	35	SOCS3, LIF, TSLP, IL24, CAV1, IL6, TNFRSF1A, CLCF1, JAK3	Improvers	Unique
GO_DOUBLE_STRAND_BREAK_REPAIR	0.00108694	0.0137132	0.45506	-0.411688	-1.57007	132	FEN1, PSMD14, MCM5, WRAP53, ERCC1, DTX3L, MCM4, FUS, XRCC3, PARP1, XRCC6, CDC7, INO80, RPA2, POLA1, MSH2, NABP1, UIMC1, SMC5, NABP2, UBE2N, RBBP8, XRCC5, MAD2L2, FANCM, WRN, MLH1, NSMCE1, MCM2, RECQL, SLF1, NBN, ARID2, PRPF19, TRIP13, FMN2, PIAS4, SWI5, TP53, RAD50, WDR70, HERC2, UBR5, GINS4, PARP2, TRIP12, DEK	Improvers	Shared
GO_REGULATION_OF_ANIMAL_ORGAN_MORPHOGENESIS	0.00110813	0.0139236	0.45506	-0.418675	-1.5905	131	LIF, HGF, PSMC3, ENG, MYC, SNAI2, TNFAIP3, PSME2, PSMD14, PSMD7, PSMD4, PSMB7, PSMD3, PSMB3, PSMB6, TBX2, PSMC5, PSMB5, PFN1, BMP2, RUNX2, PSMC2, SFRP1, PSMD6, SEMA3C, AP2M1, BCOR, TGFBR2, AP2A1, PHB2	Improvers	Shared
GO_B_CELL_ACTIVATION_INVOLVED_IN_IMMUNE_RESPONSE	0.00111603	0.0139662	0.45506	-0.577488	-1.77611	38	IL6, NKX2-3, CLCF1, GPR183, BCL3, ERCC1, MSH2, PTK2B, LFNG, NOTCH2, MAD2L2, ABL1, MLH1, ADA, ITM2A, NBN	Improvers	Unique
GO_NEGATIVE_REGULATION_OF_CELL_CYCLE_PROCESS	0.00112509	0.0140228	0.45506	-0.360558	-1.44688	201	LIF, SFN, PSMC3, RGCC, PSME2, PSMD14, CDKN1A, PSMD7, PSMD4, PSMB7, PLK3, PSMD3, PSMB3, PSMB6, PSMC5, PSMB5, CCND1, XRCC3, PSMC2, CDK2AP2, E2F4, CDC7, PSMD6, RPA2, BTG2, CDC6, CDK2, AURKAIP1, CNOT9, UIMC1, UXT, RBX1, CTDSP2, NUBP1, RBBP8, CCL2, EHMT1, ZFP36L1, CLSPN, MAD2L2	Improvers	Shared
GO_REGULATION_OF_RESPONSE_TO_CYTOKINE_STIMULUS	0.00115971	0.014335	0.45506	-0.442479	-1.64949	105	SOCS3, TSLP, CAV1, TRAF1, IL6, IL1R2, TNFAIP3, TNFRSF1A, IL1RN, SPHK1, SLIT3, IL1R1, NLRC5, LIFR, CXCR4, RUNX1, RACK1, IRAK1, PTPN2, IKBKG, BIRC3, IRF7, PXDN, AXL, PARP14, DHX9, FADD, IRAK3, TNF, OTUD4	Improvers	Unique
GO_TELOMERE_MAINTENANCE_VIA_TELOMERE_LENGTHENING	0.00116405	0.014335	0.45506	-0.560785	-1.77438	42	STN1, HNRNPA1, WRAP53, DKC1, NHP2, PARP1, CCT2, NAT10, CCT6A, CCT7, CCT3, XRCC5, SMG6, ATR, TELO2	Improvers	Shared
GO_HEART_MORPHOGENESIS	0.00120035	0.0145987	0.45506	-0.408724	-1.55877	132	TEK, NRP2, S1PR1, SNAI1, ACVRL1, ENG, FOXF1, SNAI2, FHL2, SLIT3, SMAD6, TBX2, TBX3, ILK, BMP2, NDRG4, MIR17HG, MICAL2, MEF2C, SMAD7, NRG1, SEMA3C, TMEM100, TGFBR2, IFT57, NOTCH2, ANKRD1, RARA, PARVA	Improvers	Unique
GO_TRNA_TRANSPORT	0.00120102	0.0145987	0.45506	-0.691128	-1.8713	21	NUP107, RAN, NUP205, NUP35, NUP188, NUP93, NUP37, NUP62, SSB, YBX1	Improvers	Shared
GO_EMBRYONIC_ORGAN_DEVELOPMENT	0.00120436	0.0145987	0.45506	-0.362084	-1.46503	214	NES, SOCS3, LIF, JUNB, TEAD4, SNAI1, ENG, PRDM1, KDR, FOXF1, PDGFB, TBX2, TBX3, ERCC1, PHLDA2, EPHA2, RPL10, HOXB6, EIF4A3, GLI2, WNT9A, RUNX2, NDRG4, KRT19, EPAS1, MICAL2, MEF2C, CEBPB, SPRY2, TCF7, TULP3, TGFBR2, IFT57, LHFPL5, HOXB4, NOTCH2, ATP8A2, RARA, AKT1, TRIM28, ZFP36L1, PRRX1, NOTCH1, THOC5, TNF, WHRN, MBD2	Improvers	Unique
GO_NEGATIVE_REGULATION_OF_BLOOD_VESSEL_ENDOTHELIAL_CELL_MIGRATION	0.00121935	0.0147227	0.45506	-0.690177	-1.86872	21	FGF2, ACVRL1, RGCC, ANGPT2, THBS1, MEF2C, NOTCH1, TNF, STARD13, ATP2B4, DLL4, GADD45A	Improvers	Unique
GO_POSITIVE_REGULATION_OF_IMMUNE_SYSTEM_PROCESS	0.00133543	0.0159375	0.45506	-0.304116	-1.33414	495	IL13RA2, CSF3, PNP, IL1RL1, CCR7, SERPINE1, LIF, TSLP, IL1B, C7, CAV1, PSMC3, SEMA7A, IL6, ETS1, PDE4B, FOXF1, SELE, RSAD2, RGCC, PSME2, CCL7, RELB, PLVAP, IL33, CLCF1, PSMD14, CDKN1A, GPR183, ITGA2, PSMD7, PSMD4, PSMB7, PSMD3, COCH, CD79A, PSMB3, PSMB6, IL1R1, ACTB, PSMC5, PSMB5, EIF2B3, IDO1, INHBA, GLI2, NLRC5, JAK3, PSMC2, ISG15, KLF10, SLC7A5, THBS1, STAT5B, EFNB2, LCP2, XRCC6, MEF2C, PSMD6,…	Improvers	Unique
GO_REGULATION_OF_ACTIN_FILAMENT_BASED_PROCESS	0.00135857	0.0161513	0.45506	-0.359221	-1.45306	218	TEK, CSF3, CCR7, S1PR1, CAV1, PDE4B, STC1, RGCC, ARHGAP6, MYH9, LMOD1, ID1, MYADM, PFN1, RHOF, ILK, ARHGDIA, CAPZB, PDPN, WDR1, TRIM27, GMFG, SFRP1, MEF2C, TMOD1, ARHGEF15, FLII, PXN, ROCK2, RND1, SPTBN2, PTK2B, HRAS, INPP5K, CFL1, DAPK3, NOTCH2, SNX9, TWF2, ARAP1, FRMD6	Improvers	Unique
GO_POSITIVE_REGULATION_OF_ENDOTHELIAL_CELL_MIGRATION	0.00137984	0.0163413	0.45506	-0.494188	-1.69218	66	FGF2, TEK, NRP2, FGFBP1, KDR, ETS1, PLPP3, PDGFB, ANXA3, HSPB1, THBS1, JCAD, STAT5A, ROCK2, PTK2B, RRAS, AAMP, AKT1, ZC3H12A, ABL1	Improvers	Shared
GO_NCRNA_CATABOLIC_PROCESS	0.00138715	0.0163652	0.45506	-0.695865	-1.82782	19	POP1, EXOSC2, EXOSC4, SND1, PELO, DIS3L2, EXOSC8, NSUN2, TRIR, ZC3H12A	Improvers	Unique
GO_REGULATION_OF_GENE_SILENCING	0.00140119	0.0164679	0.45506	-0.510096	-1.72032	61	ZFP36, IL6, HMGA1, NUP107, EIF4G1, NUP205, NUP35, NUP188, XPO5, NUP93, CDK2, POLR2G, SIN3A, DHX9, ZC3H12A, NUP37, TNF, STAT3, NUP62, ADAR, DDX5, POLR2B, POM121, TP53, NUP50, POLR2F, RIPK1, POLR2A, MAP2K2	Improvers	Shared
GO_RESPONSE_TO_BACTERIUM	0.00140834	0.0164893	0.45506	-0.338828	-1.41847	294	THBD, CSF3, CCR7, SERPINE1, AKAP12, IL1B, BMP6, ZFP36, EDNRB, IL24, CAV1, ADAMTS9, IL6, PPARD, PDE4B, S100A8, SELE, NFKBIA, TNFAIP3, TNFRSF1A, SBNO2, NEXN, NLRP1, CSF2RB, PTGIR, COCH, SMAD6, BCL3, SCN7A, TNFRSF11A, IDO1, HAMP, EPHA2, ANXA3, NLRC5, BMP2, ABCC2, ISG15, LPL, VGF, MEF2C, CEBPB, FGB, RPS19, MYD88, IRAK1, CCDC80, MICA, PRPF8, ROMO1, NR1D1, PLAA, UPK1B, CXCL5, SPON2, FUCA2, CUBN, RPL39,…	Improvers	Unique
GO_RESPONSE_TO_PROGESTERONE	0.00146434	0.0169775	0.45506	-0.63425	-1.7966	26	FOSL1, OXTR, CAV1, THBS1, FOS, RELA, FOSB	Improvers	Unique
GO_POSITIVE_REGULATION_OF_PROTEIN_LOCALIZATION_TO_NUCLEUS	0.00146652	0.0169775	0.45506	-0.545688	-1.75672	48	LIF, INS, DTX3L, RAN, DKC1, PARP1, BAG3, NUTF2, CDH1, ZPR1, CCT2, CCT6A, CCT7, MCRS1, CCT3, AKT1, TRIM28, ZC3H12A	Improvers	Unique
GO_REGULATION_OF_CELLULAR_AMINE_METABOLIC_PROCESS	0.00147542	0.0170169	0.45506	-0.568484	-1.75507	39	PSMC3, INS, PSME2, PSMD14, PSMD7, PSMD4, PSMB7, PSMD3, PSMB3, PSMB6, PSMC5, PSMB5, PSMC2, PSMD6	Improvers	Shared
GO_RNA_PHOSPHODIESTER_BOND_HYDROLYSIS_ENDONUCLEOLYTIC	0.0014839	0.017051	0.45506	-0.534136	-1.71324	49	FEN1, POP1, BMS1, APEX1, NOP14, TSR1, RPS21, SND1, POP7, ELAC2, KRI1, ABT1, DGCR8, SMG6, RPP40, ZC3H12A	Improvers	Shared
GO_CARDIAC_CHAMBER_MORPHOGENESIS	0.001528	0.0173369	0.45506	-0.491	-1.68126	66	TEK, NRP2, ENG, FOXF1, FHL2, SLIT3, SMAD6, TBX2, TBX3, MIR17HG, MEF2C, SMAD7, NRG1, SEMA3C, TGFBR2, NOTCH2, RARA, PARVA, NOTCH1	Improvers	Unique
GO_PRI_MIRNA_TRANSCRIPTION_BY_RNA_POLYMERASE_II	0.00153099	0.0173369	0.45506	-0.604581	-1.82405	33	FGF2, FOSL1, ETS1, PPARD, GNL3, PDGFB, SMAD6, BMP2, FOS, RELA, TNF, STAT3	Improvers	Shared
GO_RESPONSE_TO_GROWTH_FACTOR	0.00153121	0.0173369	0.45506	-0.317762	-1.37172	413	FGF2, NRP2, IL1B, BMP6, ZFP36, EHD1, HGF, CAV1, FGFBP1, ACVRL1, ENG, KDR, MYC, SNAI2, ITGA5, TMEM204, FERMT2, PDCD5, PDGFB, SPHK1, HNRNPA1, ANGPT2, SMAD6, ID1, EHD4, PTP4A3, CDH5, EPHA2, EIF4A3, ANXA3, DUSP6, ILK, PARP1, BMP2, FLT1, RUNX2, HSPB1, NCL, THBS1, STAT5B, JCAD, CHRDL1, CDC34, SFRP1, ZYX, PELO, RPS27A, BMP8B, EMILIN1, MIR17HG, MEF2C, SMAD7, SPRY2, RAPGEF2, CAD, ZPR1, RACK1, EMD, DTYMK, …	Improvers	Shared
GO_LIVER_REGENERATION	0.00157139	0.0176218	0.45506	-0.64749	-1.81036	24	IL6, PRMT5, HAMP, RPL10, REG1A, CCND1, CEBPB	Improvers	Unique
GO_SNRNA_METABOLIC_PROCESS	0.00157139	0.0176218	0.45506	-0.646318	-1.80708	24	EXOSC2, DKC1, NHP2, EXOSC4, EXOSC8, TOE1, METTL16, INTS1, INTS4, USB1, INTS7, INTS5, INTS9, EXOSC7, TUT1	Improvers	Shared
GO_REGULATION_OF_IMMUNOGLOBULIN_PRODUCTION	0.00157348	0.0176218	0.45506	-0.632464	-1.79154	26	IL13RA2, IL6, IL33, CLCF1, MSH2, MAD2L2, TNF, MLH1, HLA-E, STX4, TRAF2	Improvers	Unique
GO_POSITIVE_REGULATION_OF_DNA_TEMPLATED_TRANSCRIPTION_INITIATION	0.00162718	0.0181575	0.45506	-0.671834	-1.84477	22	FOSL1, PSMC3, PSMC5, ERCC1, PSMC2	Improvers	Unique
GO_ADHERENS_JUNCTION_ORGANIZATION	0.00164245	0.0182619	0.45506	-0.565499	-1.74585	39	BMP6, VCL, ACTB, CDH5, RASSF8, EFNB2, KIFC3, CDH1, SMAD7, CDH19, CDH11	Improvers	Unique
GO_NEGATIVE_REGULATION_OF_EPITHELIAL_CELL_DIFFERENTIATION	0.00178821	0.0195314	0.45506	-0.692458	-1.86265	20	CAV1, ACVRL1, CDSN, ID1, TBX3, CCND1, SPRY2	Improvers	Unique
GO_TRANSCRIPTION_ELONGATION_FROM_RNA_POLYMERASE_II_PROMOTER	0.00185034	0.0201387	0.45506	-0.507285	-1.68473	58	NELFE, SSRP1, MLLT1, NELFCD, CCNH, BRD4, TCERG1, POLR2G, GTF2F1, GTF2H2, WDR61, ELOA, GTF2H3, ELOF1, GTF2F2, SUPT16H, IWS1, MNAT1, ELOC, CTDP1, EZH2, CDK7, POLR2B, SUPT6H, CDK12, POLR2F, POLR2A, HNRNPU, ERCC3, NELFB, CTR9	Improvers	Shared
GO_ANGIOGENESIS_INVOLVED_IN_WOUND_HEALING	0.00186515	0.0202287	0.45506	-0.695483	-1.7953	18	SERPINE1, GPR4, KDR, ETS1, TNFAIP3, CXCR4	Improvers	Unique
GO_RENAL_SYSTEM_VASCULATURE_DEVELOPMENT	0.00187234	0.0202357	0.45506	-0.738259	-1.83246	15	TEK, GPR4, PDGFB, ANGPT2, ACTA2, NOTCH2, NOTCH1, PDGFRA	Improvers	Unique
GO_RESPONSE_TO_VIRUS	0.00197833	0.0212327	0.431708	-0.379763	-1.50003	178	FOSL1, IL1B, IL6, RSAD2, TNFAIP3, HMGA1, IL33, BCL3, DTX3L, ACTA2, NLRC5, POLR3H, CCL22, UFD1, HSPB1, EXOSC4, ISG15, CXCR4, GBF1, RIPK3, ILF3, MICA, IFI6, POLR3D, MX1, TRAF3IP2, IKBKG, PQBP1, SPON2, BIRC3, IRF7, POLR3E, PHB2, XPR1, CFL1, NPLOC4, GTF2F1, SIN3A, BCL2L1, RELA, ISG20, OAS2, DHX9, POLR3F, FADD, DDX60, AUP1, ZC3H12A, IRAK3, TNF, IFI44, MX2, CLPB, ADAR, TKFC, HNRNPUL1, NT5C3A	Improvers	Shared
GO_NEGATIVE_REGULATION_OF_VASCULATURE_DEVELOPMENT	0.00199158	0.0213009	0.431708	-0.47062	-1.61995	68	TEK, SERPINE1, GPR4, ADAMTS9, TIE1, RGCC, PDGFB, ANGPT2, DNMT1, EPHA2, THBS1, EMILIN1, ADGRB3, SPRY2, GHRL, ROCK2, NFATC2	Improvers	Unique
GO_RESPONSE_TO_IONIZING_RADIATION	0.00202111	0.0215423	0.431708	-0.447152	-1.64986	97	THBD, MYC, SNAI2, CCL7, CDKN1A, ERCC1, HAMP, CCND1, PARP1, SFRP1, XRCC6, INO80, MSH2, NABP1, UIMC1, HRAS, NABP2, BCL2L1, XRCC5, TMEM109, ATR, WRN, HSPA5, RRM1	Improvers	Unique
GO_CHONDROCYTE_DIFFERENTIATION	0.00204128	0.0216825	0.431708	-0.493349	-1.65339	59	BMP6, ACVRL1, SNAI2, GLI2, BMP2, WNT9A, RUNX2, RFLNB, CHSY1, MEF2C, SMAD7, SLC39A14, RUNX1, CREB3L2, RFLNA, TGFBR2	Improvers	Unique
GO_POSITIVE_REGULATION_OF_CELL_GROWTH	0.0020972	0.0221882	0.431708	-0.426763	-1.58879	101	SFN, SEMA7A, INS, S100A8, HBEGF, TNFRSF12A, PRSS2, SPHK1, EIF4G1, EXOSC2, HAMP, REG1A, ILK, EXOSC4, SFRP1, CXCR4, SMAD7, INO80, PLAA, TRPV2, RPTOR, PTK2B, KRT17, TWF2, AKT1	Improvers	Unique
GO_CELL_CELL_JUNCTION_ORGANIZATION	0.00210325	0.0221882	0.431708	-0.421936	-1.58562	114	IL1B, BMP6, CAV1, SNAI1, CLDN14, VCL, SNAI2, PKP1, ACTB, CDH5, EPHA2, RASSF8, WDR1, EFNB2, KIFC3, CDH1, SMAD7, RUNX1, ROCK2, MPP5, CDH19, PARD3, SVEP1, PKP3, GJC1, TJP2, CDH11	Improvers	Unique
GO_RESPONSE_TO_INTERLEUKIN_7	0.00213458	0.0223973	0.431708	-0.686042	-1.84539	20	TSLP, JAK3, SOCS2, STAT5B, STAT5A, IL7R, STAT3, YBX1, SMARCA4, HDGF, STIP1, GIPC1	Improvers	Unique
GO_IRON_ION_HOMEOSTASIS	0.00214399	0.0223973	0.431708	-0.524452	-1.69001	51	ERFE, BMP6, MYC, HAMP, GLRX3, SLC25A28, EPAS1, STEAP3, FTL, SLC39A14, HMOX2, NUBP1	Improvers	Unique
GO_REGULATION_OF_RECEPTOR_SIGNALING_PATHWAY_VIA_STAT	0.00214481	0.0223973	0.431708	-0.503074	-1.69664	61	SOCS3, LIF, TSLP, IL24, CAV1, IL6, TNFRSF1A, CLCF1, BCL3, JAK3, SOCS2, IL7R, PWP1, PTPN2, PTK2B, PARP14, NOTCH1, TNF, STAT3	Improvers	Unique
GO_POSITIVE_REGULATION_OF_CELL_CYCLE_PROCESS	0.00218211	0.0225582	0.431708	-0.376013	-1.47034	163	IL1B, SFN, INS, RGCC, FEN1, CDKN1A, APEX1, PLK3, PDGFB, SPHK1, EIF4G1, CCND1, XRCC3, E2F4, CDC7, MAP10, INO80, BTG2, CDC6, CDK2, ROCK2, ZBTB17, RPTOR, BRD4, CNOT9, PHB2, DYRK3, SMC5, SIN3A, SSTR5, AKT1, PAGR1	Improvers	Unique
GO_ACUTE_INFLAMMATORY_RESPONSE	0.00220442	0.0225788	0.431708	-0.515038	-1.68588	55	CCR7, IL1B, EDNRB, IL6, INS, S100A8, TNFRSF11A, HAMP, OSMR, CEBPB, APOL2, F12, ANO6, SERPINA3, F3, RHBDD3, C2CD4A, ADCYAP1, TNF, STAT3, HLA-E	Improvers	Unique
GO_ENDOTHELIAL_CELL_DEVELOPMENT	0.00220601	0.0225788	0.431708	-0.532616	-1.68639	44	IL1B, ENG, VCL, STC1, TNFRSF1A, ROBO4, ID1, MYADM, CDH5, RAPGEF2, COL22A1, ROCK2	Improvers	Shared
GO_POSITIVE_REGULATION_OF_ACUTE_INFLAMMATORY_RESPONSE	0.00220601	0.0225788	0.431708	-0.734746	-1.82373	15	CCR7, IL1B, IL6, TNFRSF11A, OSMR, F12, C2CD4A, TNF, HLA-E	Improvers	Unique
GO_CYTOKINE_PRODUCTION	0.0022166	0.0226122	0.431708	-0.315346	-1.36157	412	PNP, IL1RL1, CCR7, SERPINE1, TSLP, AKAP12, NAV3, IL1B, ZFP36, HGF, SEMA7A, NLRC3, IL6, INS, PDE4B, S100A8, IL1R2, SNAI2, RSAD2, TNFAIP3, RGCC, RELB, IL33, SERPINB1, NLRP1, SPHK1, IL1R1, BCL3, IDO1, EPHA2, INHBA, PANX1, NLRC5, POLR3H, UFD1, JAK3, HSPB1, GAPDH, ISG15, SLC7A5, THBS1, TRIM27, LPL, LCP2, XRCC6, NUTF2, DHX33, SMAD7, CEBPB, RIPK3, MYD88, STOML2, RUNX1, IRAK1, GHRL, POLR3D, RPS6KA4, POLA…	Improvers	Unique
GO_CELL_CYCLE_G1_S_PHASE_TRANSITION	0.00222391	0.0226122	0.431708	-0.37704	-1.48165	172	SFN, MYC, RGCC, PSME2, CDKN1A, APEX1, PLK3, MCM5, EIF4G1, MCM4, GSPT1, INHBA, CCND1, EIF4EBP1, CDC34, CDK2AP2, E2F4, CDC7, INO80, RPA2, ZPR1, BTG2, POLA1, CCNH, POLA2, CDC6, CDK2, RPTOR, BRD4, CNOT9, ORC3, PHB2, CTDSP2, RBBP8, CCL2, PPAT, AKT1, PAGR1, ITGB1, KHDRBS1, POLE4, ATP2B4, MCM2, MTBP, WEE1, CNOT1, GADD45A, MNAT1, EZH2, LSM10, CDK7, E2F6, ACVR1	Improvers	Shared
GO_RESPONSE_TO_EPIDERMAL_GROWTH_FACTOR	0.00227102	0.0230155	0.431708	-0.564262	-1.7626	40	ZFP36, SNAI2, ID1, NCL, STAT5B, CAD, ZPR1, INPP5K, KNSTRN, EEF1A1, AKT1, ZFP36L1, DUSP22, PPP1R9B, ERRFI1	Improvers	Unique
GO_CELLULAR_RESPONSE_TO_LIPID	0.00230333	0.0232667	0.431708	-0.322254	-1.3608	314	CSF3, SERPINE1, IL1B, BMP6, ZFP36, EDNRB, IL24, IL6, PPARD, PDE4B, SNAI2, NFKBIA, STC1, TNFAIP3, SBNO2, ITGA2, DDX54, HAMP, RUVBL2, INHBA, EIF4EBP1, PARP1, WNT9A, ABCC2, SFRP1, LPL, MEF2C, CEBPB, MYD88, RUNX1, IRAK1, PRPF8, NR1D1, TESC, ZNF35, PLAA, ROCK2, CXCL5, SPON2, CNOT9, PHB2, PTK2B, NFKB1, HMGCS1, AXL, DAXX, KMO, ANKRD1, RELA, TWF2, CCL2, SSTR5, RARA, RAMP3, AKT1, XRCC5, SAFB, PAGR1, ZFP36…	Improvers	Unique
GO_CELL_MIGRATION_INVOLVED_IN_SPROUTING_ANGIOGENESIS	0.00232587	0.0234178	0.431708	-0.571512	-1.74769	35	FGF2, FGFBP1, KDR, CLEC14A, THBS1, JCAD, EFNB2, AKT1, NOTCH1, ITGB1, ABL1, STARD13, DLL4	Improvers	Shared
GO_NEGATIVE_REGULATION_OF_CELL_CYCLE	0.00233658	0.0234492	0.431708	-0.315976	-1.35206	366	LIF, SFN, PSMC3, MYC, TNFAIP3, RGCC, PSME2, PSMD14, CDKN1A, PSMD7, PSMD4, PSMB7, PLK3, PSMD3, PSMB3, PSMB6, PSMC5, PSMB5, BTG3, INHBA, CCND1, XRCC3, ILK, BMP2, WNT9A, PSMC2, THBS1, CDK2AP2, E2F4, CDC7, PSMD6, RPA2, CDC123, BTG2, NSUN2, TBRG4, CDC6, CDK2, AURKAIP1, ZBTB17, TIPIN, RPTOR, CDK5RAP1, MSH2, CNOT9, NABP1, TP53BP2, UIMC1, UXT, HRAS, RBX1, CTDSP2, NUBP1, SDE2, NABP2, ATRIP, APBB2, NOTCH2,…	Improvers	Shared
GO_NEGATIVE_REGULATION_OF_ENDOTHELIAL_CELL_PROLIFERATION	0.00234885	0.0234961	0.431708	-0.627668	-1.80332	28	CAV1, ACVRL1, RGCC, FLT1, THBS1, MEF2C, GHRL, CCL2, APOH, TNF, DLL4	Improvers	Unique
GO_TYPE_I_INTERFERON_PRODUCTION	0.00238795	0.0238101	0.431708	-0.459067	-1.62673	80	NLRC3, TNFAIP3, RELB, NLRC5, POLR3H, UFD1, ISG15, XRCC6, DHX33, MYD88, IRAK1, POLR3D, POLA1, PQBP1, IRF7, POLR3E, NMI, NFKB1, NPLOC4, RELA, DHX9, XRCC5, POLR3F, ZBTB20, POLR1C	Improvers	Unique
GO_CELLULAR_RESPONSE_TO_ABIOTIC_STIMULUS	0.00242255	0.0240775	0.431708	-0.361055	-1.43652	193	IL1B, BMP6, ENG, MYC, SNAI2, TNFRSF1A, RELB, CDKN1A, ITGA2, ERCC1, HAMP, RUVBL2, EIF2S1, EFHD1, PARP1, BAG3, SFRP1, XRCC6, INO80, MYD88, NOC2L, BDKRB2, LRRC8C, LETM1, RAB11B, METAP2, FAS, POLD1, DDB1, ARHGEF2, TNFRSF10A, HRAS, NFKB1, SDE2, BCL2L1, ANKRD1, AKT1, XRCC5, ZFP36L1, FADD, TMEM109, ATR, WRN, HSPA5, ERRFI1	Improvers	Unique
GO_REGULATION_OF_CHONDROCYTE_DIFFERENTIATION	0.00243129	0.024087	0.431708	-0.592666	-1.72391	30	BMP6, ACVRL1, SNAI2, GLI2, WNT9A, RUNX2, RFLNB, SMAD7, RFLNA, RELA	Improvers	Unique
GO_POSITIVE_REGULATION_OF_EPITHELIAL_CELL_DIFFERENTIATION	0.00250441	0.0246533	0.431708	-0.557817	-1.71049	36	FGF2, SERPINE1, LIF, BMP6, SFN, ACVRL1, CDH5, SULT2B1, TMEM100	Improvers	Shared
GO_NEGATIVE_REGULATION_OF_DEVELOPMENTAL_PROCESS	0.00255286	0.0250337	0.431708	-0.297887	-1.30569	497	TEK, SERPINE1, IL1B, ZFP36, GPR4, EDNRB, TRPC6, CAV1, ADAMTS9, SNAI1, SEMA7A, ACVRL1, IL6, MYC, PPARD, CDSN, SNAI2, NFKBIA, TIE1, RGCC, CDKN1A, TWIST2, PDGFB, ANGPT2, SMAD6, PRMT5, ID1, TBX2, DNMT1, TBX3, SEMA3F, EPHA2, INHBA, CCND1, GLI2, JARID2, ANXA2, JAK3, BMP2, ARHGDIA, WNT9A, SOCS2, THBS1, STAT5B, EFNB2, TRIO, SFRP1, DGUOK, WWC1, EMILIN1, ADGRB3, MIR17HG, RFLNB, SMAD7, WDR77, SPRY2, RUNX1, …	Improvers	Unique
GO_BLOOD_VESSEL_ENDOTHELIAL_CELL_PROLIFERATION_INVOLVED_IN_SPROUTING_ANGIOGENESIS	0.00255926	0.0250337	0.431708	-0.712155	-1.78546	16	FGF2, FGFBP1, ACVRL1, APLNR, EPHA2, THBS1, JCAD	Improvers	Unique
GO_POSITIVE_REGULATION_OF_WNT_SIGNALING_PATHWAY	0.00257159	0.025075	0.431708	-0.428448	-1.5688	94	CAV1, PSMC3, TNFAIP3, PSME2, PSMD14, PSMD7, PSMD4, PSMB7, PSMD3, PSMB3, PSMB6, PSMC5, PSMB5, ILK, BMP2, PSMC2, SFRP1, PSMD6	Improvers	Shared
GO_REGULATION_OF_DNA_TEMPLATED_TRANSCRIPTION_INITIATION	0.00260924	0.0253621	0.431708	-0.621953	-1.78431	27	FOSL1, PSMC3, PSMC5, ERCC1, PSMC2	Improvers	Unique
GO_NEGATIVE_REGULATION_OF_TRANSFERASE_ACTIVITY	0.00272639	0.0264178	0.431708	-0.375622	-1.47808	175	SOCS3, IL1B, ZFP36, SFN, PTPRB, CAV1, PKIG, TNFAIP3, DUSP5, ITPRIP, CDKN1A, DTX3L, DUSP6, ILK, MLLT1, HSPB1, TRIM27, GMFG, SFRP1, RPS7, SMAD7, SPRY2, RACK1, UCHL1, PTPN2, TESC, PPP2R5A, RPTOR, CDK5RAP1, INPP5K, IBTK, AKT1, DUSP22, RPL11, MVP, MAD2L2, IRAK3, ABL1, NUP62, ERRFI1, TSG101	Improvers	Unique
GO_PROTEIN_CONTAINING_COMPLEX_LOCALIZATION	0.00274318	0.0264974	0.431708	-0.367031	-1.45077	185	EXOC3L1, EXOC3L2, EIF5A, ALYREF, NUP107, RAN, EIF6, EIF4A3, NUP205, SRSF7, SRSF2, EFNB2, NUP35, LTV1, NUP188, NUP93, NXT1, SMAD7, NSUN2, MX1, EXOC3, THOC6, DHX38, KIF5A, RPGR, RPS15, IFT57, HRAS, RBM15B, KLHL21, SSNA1, MAGOHB, SMG6, RBM8A, SRSF4, IFT88, THOC5, ATR, NUP37, NUP62, CACNG5, U2AF2, MX2, SSB	Improvers	Unique
GO_CELLULAR_RESPONSE_TO_CHEMICAL_STRESS	0.00275659	0.0264975	0.431708	-0.347561	-1.40995	224	HGF, TRPC6, CAV1, IL6, INS, ETS1, TNFAIP3, RELB, APEX1, SPHK1, EIF2S1, EFHD1, PARP1, HSPB1, EPAS1, XRCC6, RIPK3, RACK1, ROMO1, BDKRB2, PXN, LRRC8C, LETM1, CDK2, FAS, TXNRD1, PLEKHA1, TXN, ZNF622, ARHGEF2, G6PD, AXL, FOS, SIN3A, RELA, RPS3, AKT1, XRCC5, ZFP36L1, SZT2, ZC3H12A, PYCR1, TNF, ABL1, ERRFI1, PDGFRA, STX4, NR4A2, TRAP1, PRDX5, NME2, AKR1B1, HNRNPD	Improvers	Unique
GO_KERATINIZATION	0.00276034	0.0264975	0.431708	-0.589705	-1.71529	30	SFN, CDSN, KRT7, PKP1, KRT18, KRT10, KRT19, KRT81, PKP3, KRT17	Improvers	Unique
GO_NUCLEOBASE_CONTAINING_COMPOUND_TRANSPORT	0.00279589	0.0266732	0.431708	-0.37607	-1.46742	161	ZFP36, EIF5A, ALYREF, HNRNPA1, CETN2, NUP107, RAN, EIF6, EIF4A3, NUP205, SRSF7, SRSF2, NUP35, LTV1, NUP188, XPO5, NUTF2, NUP93, NXT1, NSUN2, THOC6, DHX38, TGFBR2, RPS15, RBM15B, DHX9, MAGOHB, SMG6, ZFP36L1, SLC25A12, RBM8A, SRSF4, MVP, THOC5, KHDRBS1, NUP37, RFTN1, NUP62, NUP62CL, CPSF6, U2AF2, MX2, SSB, YBX1, SLC25A17	Improvers	Shared
GO_RNA_PHOSPHODIESTER_BOND_HYDROLYSIS	0.00285084	0.0271137	0.431708	-0.440892	-1.59587	92	FEN1, POP1, BMS1, APEX1, EXOSC2, NHP2, NOP14, TSR1, EXOSC4, RPS21, SND1, DIS3L2, EXOSC8, TOE1, POP7, ELAC2, KRI1, ABT1, AZGP1, DGCR8, ISG20, ERI1, SMG6, RPP40, XRN2, TRIR, ZC3H12A, CPSF6, POP5, CNOT1, DCPS, CPSF3, USB1, POLR3K	Improvers	Shared
GO_POSITIVE_REGULATION_OF_INNATE_IMMUNE_RESPONSE	0.00292173	0.0276179	0.431708	-0.418308	-1.55731	101	PSMC3, PSME2, RELB, PSMD14, PSMD7, PSMD4, PSMB7, PSMD3, COCH, PSMB3, PSMB6, PSMC5, PSMB5, NLRC5, PSMC2, STAT5B, XRCC6, PSMD6, RPS19, POLR3D, IKBKG, PQBP1, IRF7, HRAS, NFKB1, SIN3A, RELA, DHX9, XRCC5, POLR3F, FADD, PAK3, HLA-E, CARD11, MUC6	Improvers	Shared
GO_REGULATION_OF_OSSIFICATION	0.00299342	0.0281236	0.431708	-0.416861	-1.55193	101	S1PR1, BMP6, HGF, IL6, SNAI2, TWIST2, SMAD6, ID1, PDLIM7, ILK, BMP2, RUNX2, ISG15, SFRP1, RFLNB, CHSY1, MEF2C, SMAD7, CEBPB, ENPP1, ANO6, BCOR, RFLNA, PTK2B	Improvers	Unique
GO_EXTRINSIC_APOPTOTIC_SIGNALING_PATHWAY	0.00305237	0.0284776	0.431708	-0.380875	-1.47541	152	SERPINE1, IL1B, HGF, CAV1, TRAF1, G0S2, SNAI2, TNFAIP3, TNFRSF1A, ITPRIP, TNFRSF12A, IL33, LMNA, INHBA, KRT18, THBS1, BAG3, SFRP1, FGB, IFI6, FAS, ITGA6, SIVA1, ARHGEF2, TNFRSF10A, DAXX, DAPK3, BCL2L1, RELA, AKT1, FADD, BCL2L12, FAF1, TNF	Improvers	Unique
GO_MORPHOGENESIS_OF_A_BRANCHING_STRUCTURE	0.0030711	0.0284776	0.431708	-0.411972	-1.53071	106	FGF2, SOCS3, HGF, ENG, PRDM1, KDR, MYC, FOXF1, SNAI2, TBX3, EPHA2, TGM2, GLI2, ILK, BMP2, SFRP1, SPRY2, SEMA3C, TGFBR2, PHB2	Improvers	Unique
GO_TRANSCRIPTION_INITIATION_FROM_RNA_POLYMERASE_I_PROMOTER	0.0030771	0.0284776	0.431708	-0.617099	-1.77039	27	POLR1E, CCNH, TAF1B, GTF2H2, GTF2H3, POLR1C, CAVIN1, POLR1B, TAF1D, MNAT1, SMARCA4, CDK7, POLR2F, BAZ2A, ERCC3	Improvers	Shared
GO_POSITIVE_REGULATION_OF_TELOMERE_MAINTENANCE	0.00307717	0.0284776	0.431708	-0.619049	-1.77856	28	GNL3, HNRNPA1, ERCC1, DKC1, CCT2, CCT6A, CCT7, NABP2, CCT3, XRCC5, ATR, HNRNPD, NBN, HNRNPA2B1	Improvers	Unique
GO_POSITIVE_REGULATION_OF_TYROSINE_PHOSPHORYLATION_OF_STAT_PROTEIN	0.00307717	0.0284776	0.431708	-0.619234	-1.77909	28	SOCS3, LIF, TSLP, IL24, IL6, TNFRSF1A, CLCF1	Improvers	Unique
GO_CELL_CELL_JUNCTION_ASSEMBLY	0.00312033	0.0287909	0.431708	-0.469631	-1.63285	73	IL1B, CAV1, SNAI1, CLDN14, VCL, SNAI2, PKP1, ACTB, CDH5, EPHA2, WDR1, SMAD7, RUNX1, ROCK2, MPP5, CDH19, PARD3, PKP3, GJC1, CDH11	Improvers	Unique
GO_MYELOID_CELL_HOMEOSTASIS	0.0033486	0.0306229	0.431708	-0.432271	-1.56159	90	ADGRF5, ZFP36, IL6, ETS1, PDE4B, HOXB6, INHBA, JAK3, ISG15, STAT5B, EPAS1, RPS19, PTPN2, SENP1, G6PD, DYRK3, AXL, ITPKB, RPS14, ZFP36L1	Improvers	Unique
GO_MUSCLE_CELL_PROLIFERATION	0.00338858	0.0308971	0.431708	-0.409918	-1.53861	110	FGF2, CALCRL, S1PR1, IL6, PPARD, HBEGF, TNFAIP3, CDKN1A, ITGA2, PDGFB, PTGIR, TBX2, DNMT1, TGM2, JARID2, ILK, NDRG4, THBS1, XRCC6, MIR17HG, MEF2C, IRAK1, NQO2	Improvers	Unique
GO_MESENCHYMAL_CELL_DIFFERENTIATION	0.00340612	0.0309657	0.431708	-0.399485	-1.5225	124	NRP2, IL1B, EDNRB, HGF, SNAI1, SEMA7A, ENG, IL6, SNAI2, RGCC, SEMA3F, BMP2, HNRNPAB, PDPN, TCOF1, SFRP1, RFLNB, MEF2C, SMAD7, SPRY2, NRG1, NOLC1, SEMA3C, PEF1, TMEM100, TGFBR2, TGFB1I1, CFL1	Improvers	Unique
GO_DECIDUALIZATION	0.00343129	0.0311029	0.431708	-0.703487	-1.76373	16	LIF, JUNB, PPARD, STC1, GHRL	Improvers	Unique
GO_REGULATION_OF_MORPHOGENESIS_OF_AN_EPITHELIUM	0.00350032	0.031438	0.431708	-0.421343	-1.55987	99	LIF, HGF, PSMC3, SNAI2, PSME2, PSMD14, PSMD7, PSMD4, PSMB7, PSMD3, PSMB3, PSMB6, TBX2, PSMC5, PSMB5, PFN1, PSMC2, SFRP1, PSMD6, AP2M1, AP2A1, PHB2	Improvers	Shared
GO_PROTEIN_SUMOYLATION	0.00350526	0.031438	0.431708	-0.515637	-1.65625	50	GNL3, STX1A, NUP107, NUP205, NUP35, NUP188, NUP93, SENP1, RANGAP1, SUMO3, RELA, PIAS3, TRIM28, NUP37, NUP62, UBE2I, EGR1, PIAS4, POM121, RNF4, HMG20B, NUP50	Improvers	Shared
GO_RNA_3_END_PROCESSING	0.00350711	0.031438	0.431708	-0.439472	-1.58243	91	NELFE, ALYREF, EXOSC2, DKC1, EIF4A3, SRSF7, SRSF2, SNRPA, EXOSC4, RPS21, EXOSC8, TOE1, ELAC2, THOC6, DHX38, ERI1, MAGOHB, ZFP36L1, RBM8A, SRSF4, SSU72, THOC5, INTS1, CPSF6, U2AF2, SSB, CPSF3, USB1, POLR3K, MAGOH, POLDIP3, INTS7, CASC3, THOC3, INTS5, EXOSC7, TUT1, ZC3H3, CTR9, HSF1, U2AF1L4, PARN	Improvers	Shared
GO_REGULATION_OF_SMALL_MOLECULE_METABOLIC_PROCESS	0.00350893	0.031438	0.431708	-0.338304	-1.3927	258	IL1B, ERFE, BMP6, CAV1, PSMC3, SNAI1, INS, PPARD, TFF3, SNAI2, FABP5, PSME2, PSMD14, PSMD7, PSMD4, PSMB7, PSMD3, PDGFB, PSMB3, NUP107, PSMB6, PSMC5, PSMB5, PHLDA2, RAN, EIF6, NUP205, ELOVL6, PARP1, BMP2, PSMC2, NUP35, NUP188, NUP93, PSMD6, NR1D1, PASK, PTPN2, ENPP1, FDPS, DDB1, AP2A1, PTK2B, INPP5K, NFKB1, SLC27A4, HMGCS1, COQ3, AKT1, OAZ1, SLC25A12, ZBTB20, SLC2A6, NUP37, TNF, STAT3, ACMSD, NUP62	Improvers	Shared
GO_REGULATION_OF_BIOMINERALIZATION	0.00354072	0.0316311	0.431708	-0.522054	-1.68064	48	S1PR1, BMP6, BMP2, ISG15, RFLNB, MEF2C, CEBPB, ENPP1, ROCK2, ANO6, BCOR, RFLNA, PTK2B	Improvers	Unique
GO_POSITIVE_REGULATION_OF_ORGANELLE_ORGANIZATION	0.00359775	0.032048	0.431708	-0.313039	-1.34612	390	TEK, NES, CSF3, KPNA7, CCR7, LIF, NAV3, IL1B, SFN, INS, KDR, SNAI2, GNL3, RGCC, FEN1, NELFE, PDCD5, PDGFB, SPHK1, HNRNPA1, LMOD1, ID1, LMNA, DNMT1, ERCC1, PFN1, DKC1, RUVBL2, JARID2, ANXA2, WDR1, TRIM27, GMFG, SFRP1, TMED9, MAPRE1, SDR16C5, ARHGEF15, RPS6KA4, KATNB1, PXN, ROCK2, CCT2, BRD4, TP53BP2, CCT6A, CCT7, PHB2, PTK2B, HRAS, HUWE1, CFL1, SMC5, NABP2, CCT3, PFDN2, SIN3A, UBE2N, RPS3, SNX9, G…	Improvers	Unique
GO_POSITIVE_REGULATION_OF_CANONICAL_WNT_SIGNALING_PATHWAY	0.0036289	0.0322326	0.431708	-0.450639	-1.59687	80	CAV1, PSMC3, PSME2, PSMD14, PSMD7, PSMD4, PSMB7, PSMD3, PSMB3, PSMB6, PSMC5, PSMB5, ILK, PSMC2, SFRP1, PSMD6	Improvers	Shared
GO_METAL_ION_HOMEOSTASIS	0.0036458	0.0322899	0.431708	-0.327156	-1.38449	317	F2RL3, FGF2, CCR7, S1PR1, ERFE, BMP6, C7, GPR4, OXTR, EDNRB, TRPC6, CAV1, MT2A, MYC, S100A8, STC1, APLNR, CCL7, RASA3, MT1X, PTGIR, SLC39A7, DIAPH1, SCN7A, CDH5, CSRP3, HAMP, GLRX3, TGM2, REG1A, SLC25A28, EPAS1, CXCR4, GSTO1, STEAP3, FTL, STOML2, SLC39A14, GHRL, BDKRB2, LETM1, TRPV2, MT1G, GNA15, HMOX2, PTK2B, NUBP1, CCRL2, SLC10A7, THADA, SELENON, GRIK2, KCNK3	Improvers	Unique
GO_ENDOTHELIAL_CELL_APOPTOTIC_PROCESS	0.00367434	0.0324209	0.431708	-0.547973	-1.68031	36	TEK, SERPINE1, KDR, TNFAIP3, RGCC, CDH5, THBS1, FGB, ANO6, CCL2, TNF, ABL1	Improvers	Unique
GO_TERMINATION_OF_RNA_POLYMERASE_I_TRANSCRIPTION	0.00368157	0.0324209	0.431708	-0.651058	-1.78772	22	POLR1E, CCNH, TAF1B, GTF2H2, GTF2H3, POLR1C, CAVIN1, POLR1B, TAF1D, MNAT1, CDK7, TTF1, POLR2F, ERCC3	Improvers	Shared
GO_NEGATIVE_REGULATION_OF_CANONICAL_WNT_SIGNALING_PATHWAY	0.0037193	0.0326601	0.431708	-0.432742	-1.56637	92	CAV1, PSMC3, SNAI2, PSME2, PSMD14, PSMD7, PSMD4, PSMB7, PSMD3, PSMB3, PSMB6, PSMC5, PSMB5, RUVBL2, BMP2, PSMC2, SFRP1, PSMD6, EMD	Improvers	Shared
GO_MULTI_ORGANISM_LOCALIZATION	0.00374059	0.0326615	0.431708	-0.531789	-1.68151	43	CAV1, NUP107, RAN, NUP205, NUP35, NUP188, RPS27A, NUP93, CTSL, KPNA1, VPS28, MVB12A, UBC, NUP37, UBA52, NUP62, TSG101	Improvers	Shared
GO_LEUKOCYTE_MIGRATION	0.00377163	0.0328397	0.431708	-0.337528	-1.37351	234	THBD, MMP1, TEK, CCR7, SERPINE1, IL1B, S1PR1, EDNRB, CAV1, IL6, PDE4B, S100A8, NKX2-3, SELE, ITGA5, CCL7, PLVAP, IL33, GPR183, ITGA2, MYH9, PDGFB, ANGPT2, IL1R1, TNFRSF11A, CCL22, FLT1, WDR1, SLC7A5, THBS1, STAT5B, CXCR4, EMILIN1, GBF1, RIPK3, RPS19, VCAM1, ANO6, STK10, CXCL5, ITGA6	Improvers	Unique
GO_FOCAL_ADHESION_ASSEMBLY	0.0037937	0.0329391	0.431708	-0.469181	-1.5944	64	TEK, ACVRL1, KDR, VCL, FERMT2, ITGA2, ARHGAP6, THBS1, SFRP1, ROCK2, MAP4K4, PTK2B, DAPK3, DUSP22, ABL1, MACF1	Improvers	Shared
GO_NEGATIVE_REGULATION_OF_CELL_POPULATION_PROLIFERATION	0.00382765	0.0331408	0.431708	-0.309252	-1.33033	393	LIF, FOSL1, IL1B, SFN, IL24, CAV1, FGFBP1, ACVRL1, NLRC3, IL6, MYC, ETS1, PPARD, SNAI2, TNFAIP3, RGCC, HMGA1, IL33, CDKN1A, PDCD5, PTGIR, GTPBP4, SLIT3, SMAD6, LMNA, AIMP2, BTG3, IDO1, CDH5, GAL, REG1A, INHBA, PTPN14, JARID2, ILK, BMP2, FLT1, WNT9A, PDPN, NDRG4, S100A11, KLF10, THBS1, EFNB2, SFRP1, DIS3L2, SULT2B1, MIR17HG, MEF2C, SMAD7, CEBPB, WDR77, SPRY2, RAPGEF2, BTG2, EMD, RASSF5, GHRL, PTPN…	Improvers	Unique
GO_EPITHELIAL_TO_MESENCHYMAL_TRANSITION	0.00392455	0.0336885	0.407018	-0.432244	-1.54794	87	IL1B, HGF, SNAI1, ENG, IL6, SNAI2, RGCC, BMP2, HNRNPAB, PDPN, TCOF1, SFRP1, RFLNB, SMAD7, SPRY2, NOLC1, PEF1, TMEM100, TGFBR2, TGFB1I1	Improvers	Unique
GO_NEGATIVE_REGULATION_OF_CELLULAR_COMPONENT_MOVEMENT	0.00393264	0.0336885	0.407018	-0.362504	-1.43205	180	FGF2, SERPINE1, NAV3, IL24, ADAMTS9, SEMA7A, ACVRL1, ENG, PPARD, VCL, TIE1, STC1, RGCC, IL33, APEX1, GTPBP4, ANGPT2, SEMA3F, ILK, NDRG4, THBS1, SRGAP1, SFRP1, EMILIN1, CDH1, MEF2C, SMAD7, NRG1	Improvers	Unique
GO_PRODUCTION_OF_MOLECULAR_MEDIATOR_INVOLVED_IN_INFLAMMATORY_RESPONSE	0.00394997	0.0336885	0.407018	-0.559484	-1.71091	35	SERPINE1, NLRC3, IL6, INS, IL1R2, IDO1, RPS19, MYD88	Improvers	Unique
GO_HOMEOSTASIS_OF_NUMBER_OF_CELLS	0.0039762	0.0336885	0.407018	-0.385036	-1.48918	151	CCR7, ADGRF5, ZFP36, IL6, ETS1, PDE4B, NKX2-3, TNFAIP3, GPR183, HOXB6, INHBA, JAK3, ISG15, STAT5B, EPAS1, MIR17HG, MEF2C, RIPK3, RPS19, IL7R, PTPN2, SENP1, FAS, G6PD, DYRK3, AXL, ITPKB, RPS14, AKT1, ZFP36L1, FADD, FH, NOTCH1, STAT3, ABL1, LMO1, CARD11, ADA, UBA5	Improvers	Unique
GO_REGULATION_OF_BINDING	0.00398435	0.0336885	0.407018	-0.34767	-1.39489	205	NES, CSF3, LIF, CAV1, NFKBIA, CDKN1A, ITGA2, PDGFB, GTPBP4, ID1, EIF4G1, ACTB, BCL3, DTX3L, PHLDA2, RAN, CRTAC1, EIF4A3, RUVBL2, EDF1, ANXA2, EIF2S1, PARP1, BMP2, RAPGEF2, MAPRE1, RACK1, EIF3D, LARP6, TXN, SUMO3, LFNG, EBF2, GTF2F1, SIN3A, RARA, AKT1, DHX9, TRIM28, RPL11, MAD2L2, ABL1, HDAC8, MBD2	Improvers	Shared
GO_NEGATIVE_REGULATION_OF_RECEPTOR_SIGNALING_PATHWAY_VIA_STAT	0.00398672	0.0336885	0.407018	-0.714791	-1.77421	15	SOCS3, CAV1, BCL3, SOCS2, PTPN2, PARP14	Improvers	Unique
GO_REGULATION_OF_BONE_MINERALIZATION	0.00398672	0.0336885	0.407018	-0.545605	-1.67805	38	S1PR1, BMP6, BMP2, ISG15, RFLNB, MEF2C, ENPP1, ANO6, BCOR, RFLNA, PTK2B	Improvers	Unique
GO_POSITIVE_REGULATION_OF_SPROUTING_ANGIOGENESIS	0.003989	0.0336885	0.407018	-0.631364	-1.77959	25	FGF2, FGFBP1, KDR, ITGA5, APLNR, JCAD, GHRL, BMPER, ABL1, AGTR1	Improvers	Shared
GO_TELOMERE_MAINTENANCE_VIA_SEMI_CONSERVATIVE_REPLICATION	0.00405194	0.0340341	0.407018	-0.710759	-1.80112	17	FEN1, POLD2, RPA2, POLA1, POLA2, POLD1, RFC4, POLE4, RFC3, RFC5, POLE, PRIM1	Improvers	Unique
GO_POSITIVE_REGULATION_OF_RESPONSE_TO_BIOTIC_STIMULUS	0.00414409	0.0347137	0.407018	-0.405646	-1.53548	118	BMP6, PSMC3, PSME2, RELB, PSMD14, PSMD7, PSMD4, PSMB7, PSMD3, COCH, PSMB3, PSMB6, PSMC5, PSMB5, NLRC5, PSMC2, STAT5B, XRCC6, PSMD6, RPS19, POLR3D, IKBKG, PQBP1, IRF7, HRAS, NFKB1, SIN3A, RELA, DHX9, XRCC5, POLR3F, FADD, DDX60, PAK3, HLA-E, CARD11, MUC6	Improvers	Shared
GO_NEGATIVE_REGULATION_OF_WNT_SIGNALING_PATHWAY	0.004185	0.0349617	0.407018	-0.40091	-1.50376	112	CAV1, PSMC3, SNAI2, PSME2, PSMD14, PSMD7, PSMD4, PSMB7, PSMD3, PSMB3, PSMB6, PSMC5, PSMB5, RUVBL2, BMP2, PSMC2, SFRP1, PSMD6, RACK1, EMD	Improvers	Shared
GO_REGULATION_OF_BMP_SIGNALING_PATHWAY	0.00422527	0.0351084	0.407018	-0.541442	-1.66028	36	ACVRL1, ENG, SMAD6, CDH5, ILK, CHRDL1, SFRP1, PELO, SMAD7, FSTL3, FST, NOTCH2, BMPER, NOTCH1, ABL1	Improvers	Unique
GO_RNA_DEPENDENT_DNA_BIOSYNTHETIC_PROCESS	0.00426761	0.0353651	0.407018	-0.548853	-1.71447	40	STN1, HNRNPA1, WRAP53, DKC1, NHP2, CCT2, NAT10, CCT6A, CCT7, CCT3, XRCC5, SMG6, ATR, TELO2	Improvers	Shared
GO_CELL_DIVISION	0.00428791	0.0354383	0.407018	-0.312495	-1.33085	351	FGF2, IL1B, SFN, TUBB, TUBA1B, TUBA1C, MYC, GNL3, PLK3, MYH9, PDGFB, CETN2, RAN, TUBA1A, STAG1, CCND1, CCDC124, SMC1A, CDK2AP2, PELO, DIS3L2, CDC7, MAP10, BIN3, INO80, MAP4, USP16, MAPRE1, MYO19, CDC123, RACK1, NSUN2, CENPX, KATNB1, CDC6, CDK2, ROCK2, TIPIN, NEDD9, PARD3, ARHGEF2, CFL1, SDE2, DYRK3, ANAPC1, SMC5, KNSTRN, HOXB4, BCL2L1, RBBP8, KLHL21, RPS3, SNX9, SSTR5, MCMBP, MAD2L2, NUMBL, NOTCH…	Improvers	Unique
GO_REGULATION_OF_BODY_FLUID_LEVELS	0.00434182	0.0357882	0.407018	-0.324504	-1.34793	272	F2RL3, THBD, SERPINE1, SFN, EHD1, OXTR, EDNRB, TRPC6, CAV1, IL6, VCL, TFPI2, APLNR, ITGA2, PEAR1, MYH9, EHD2, PDGFB, VWF, ACTB, TYRO3, APRT, CCND1, ANXA2, ILK, DHODH, HSPB1, CAPZB, PDPN, SOCS2, THBS1, STAT5B, STAT5A, LCP2, FGB, SLC22A4, CAD, DGKG, CSRP1, F12, ANXA5, ANO6, GNA15, DOCK9, F3, INPP5K, AP3B1, GNA12, AXL, FIBP, ELOVL1, PPAT, OAS2, PLAT	Improvers	Unique
GO_SMOOTH_MUSCLE_CELL_PROLIFERATION	0.00442157	0.0363486	0.407018	-0.44601	-1.58046	80	FGF2, CALCRL, S1PR1, IL6, PPARD, HBEGF, TNFAIP3, CDKN1A, ITGA2, PDGFB, PTGIR, DNMT1, TGM2, ILK, NDRG4, THBS1, XRCC6, MEF2C, IRAK1, NQO2	Improvers	Unique
GO_REGULATION_OF_PROTEIN_EXPORT_FROM_NUCLEUS	0.00451919	0.0368571	0.407018	-0.576357	-1.67647	30	IL1B, SFN, PTPN14, BAG3, XPO5, NSUN2, EMD, TXN, RANGAP1	Improvers	Unique
GO_TRNA_METHYLATION	0.00451919	0.0368571	0.407018	-0.577099	-1.67862	30	FTSJ1, TRMT6, NSUN2, TRMT1, THADA, TRMT112, ALKBH8, METTL6, NSUN6, GTPBP3, TRMT10B, TRDMT1, METTL2A, TRMT44, TRMT12	Improvers	Unique
GO_NEGATIVE_REGULATION_OF_CATALYTIC_ACTIVITY	0.00456233	0.0370135	0.407018	-0.300165	-1.30518	435	PI15, NES, SOCS3, SERPINE1, IL1B, ZFP36, SFN, PTPRB, EDNRB, HGF, CAV1, LAMP3, INS, PKIG, TFPI2, TNFAIP3, SH3RF2, DUSP5, ITPRIP, CDKN1A, SERPINB1, SPOCK2, FNIP2, DTX3L, ANXA3, DUSP6, ANXA2, ILK, WNT9A, MLLT1, HSPB1, GAPDH, THBS1, TRIM27, GMFG, SFRP1, RPS7, SPOCD1, SMAD7, SPRY2, SLC39A14, RACK1, UCHL1, IFI6, CST2, PTPN2, TESC, ANXA5, ROCK2, PPP2R5A, RPTOR, FICD, CDK5RAP1, BIRC3, SERPINA3, HRAS, INP…	Improvers	Unique
GO_LACTATION	0.00459268	0.0370652	0.407018	-0.575563	-1.67416	30	OXTR, CAV1, APRT, CCND1, DHODH, SOCS2, STAT5B, STAT5A, CAD, PPAT, OAS2	Improvers	Unique
GO_CELLULAR_RESPONSE_TO_RADIATION	0.00465736	0.0374398	0.407018	-0.397907	-1.48716	108	MYC, SNAI2, CDKN1A, ERCC1, HAMP, RUVBL2, EIF2S1, PARP1, SFRP1, XRCC6, INO80, NOC2L, METAP2, POLD1, DDB1, HRAS, SDE2, BCL2L1, XRCC5, TMEM109, ATR, WRN, HSPA5	Improvers	Unique
GO_POSITIVE_REGULATION_OF_PEPTIDYL_TYROSINE_PHOSPHORYLATION	0.00467543	0.0374398	0.407018	-0.420124	-1.54916	98	CSF3, SOCS3, LIF, TSLP, BMP6, IL11, IL24, HGF, IL6, HBEGF, ITGA5, TNFRSF1A, CLCF1, PDGFB, EHD4, NRG1, GHRL, ALKAL2, NEDD9, AFAP1L2, ARHGEF2, PTK2B, PARP14, GPRC5B, LRP4, TNF, STAT3, ABL1	Improvers	Unique
GO_ACTIN_FILAMENT_BASED_PROCESS	0.00470469	0.0375768	0.407018	-0.29537	-1.29063	453	TEK, CSF3, CCR7, S1PR1, CAV1, PDE4B, SELE, STC1, RGCC, KCNE4, ARHGAP6, KCNN2, TRIP10, MYH9, EHD2, LMOD1, ID1, PDLIM4, DIAPH1, ACTB, MYADM, PDLIM7, MSRB1, PFN1, CSRP3, PLEK2, FMNL3, MPRIP, RHOF, ILK, ARHGDIA, CAPZB, PDPN, WDR1, KRT19, TRIM27, GMFG, SFRP1, ZYX, BIN3, EFS, MICAL2, RFLNB, MEF2C, MYO19, MYO1B, TMOD1, ARHGEF15, FLII, GHRL, CSRP1, PXN, CAVIN3, ROCK2, NEDD9, CAP1, RND1, RFLNA, SPTBN2, AR…	Improvers	Unique
GO_CELLULAR_RESPONSE_TO_REACTIVE_OXYGEN_SPECIES	0.00473356	0.0377051	0.407018	-0.403914	-1.50077	106	HGF, TRPC6, IL6, ETS1, TNFAIP3, APEX1, SPHK1, RIPK3, RACK1, ROMO1, PXN, CDK2, PLEKHA1, TXN, AXL, FOS, RELA, RPS3, AKT1, SZT2, PYCR1, TNF, ABL1, PDGFRA, TRAP1, PRDX5, HNRNPD	Improvers	Unique
GO_EMBRYONIC_PLACENTA_DEVELOPMENT	0.00474515	0.0377051	0.407018	-0.495811	-1.60334	52	SOCS3, LIF, JUNB, SNAI1, PRDM1, PDGFB, PHLDA2, KRT19, EPAS1, CEBPB	Improvers	Shared
GO_MUSCLE_SYSTEM_PROCESS	0.0047897	0.0378773	0.407018	-0.343757	-1.39087	214	CALCRL, IL1B, OXTR, EDNRB, CAV1, LMCD1, PDE4B, VCL, STC1, TNFRSF1A, KCNE4, ITGA2, KCNN2, SPHK1, LMOD1, LMNA, SCN7A, CSRP3, HAMP, GLRX3, ACTA2, C12orf57, JARID2, PARP1, NDUFS6, CXCR4, GSTO1, MIR17HG, MEF2C, SMAD7, TMOD1, EMD, GHRL, BDKRB2, PXN, ROCK2	Improvers	Unique
GO_DNA_TEMPLATED_TRANSCRIPTION_TERMINATION	0.0047941	0.0378773	0.407018	-0.528408	-1.70349	47	SNRPB, PRMT5, POLR1E, CCNH, TAF1B, GTF2H2, DHX9, XRN2, GTF2H3, POLR1C, SSU72, CAVIN1, POLR1B, TAF1D, MNAT1, CPSF3, LSM10, POLR3K, CDK7, TTF1, POLR2F, POLR2A, ERCC3	Improvers	Shared
GO_NEGATIVE_REGULATION_OF_PROTEIN_MODIFICATION_BY_SMALL_PROTEIN_CONJUGATION_OR_REMOVAL	0.0048323	0.037936	0.407018	-0.482115	-1.62371	60	CAV1, TNFAIP3, SH3RF2, GTPBP4, DTX3L, ISG15, RPS7, SMAD7, PLAA, VPS28, RELA, RPS3, PIAS3, AKT1, RPL11, MAD2L2, ABL1, HDAC8, U2AF2	Improvers	Shared
GO_POSITIVE_REGULATION_OF_OSSIFICATION	0.00483558	0.037936	0.407018	-0.532701	-1.6446	39	BMP6, HGF, IL6, PDLIM7, ILK, BMP2, RUNX2, ISG15, MEF2C, CEBPB, ANO6	Improvers	Unique
GO_SIGNAL_TRANSDUCTION_BY_P53_CLASS_MEDIATOR	0.00488503	0.0382269	0.407018	-0.366826	-1.42961	160	SFN, SNAI1, SNAI2, RGCC, CDKN1A, PLK3, PRMT5, BCL3, SSRP1, RPS7, E2F4, PAK1IP1, RPA2, NOC2L, BTG2, BDKRB2, CDK2, MSH2, RFC4, CNOT9, TP53BP2, RPF2, DYRK3, ATRIP, ANKRD1, RBBP8, AKT1, EHMT1, TAF6, BCL2L12, RPL11, TMEM109, ATR, TAF12, WRN, USP10, SUPT16H, PRKAG1, RFC3, NBN, CNOT1, GADD45A, TAF2, DDX5, RFC5, KAT6A, HNRNPK, RFFL, TP53, E2F7, CASP2, KMT5A	Improvers	Shared
GO_REGULATION_OF_PEPTIDYL_TYROSINE_PHOSPHORYLATION	0.00493549	0.0385243	0.407018	-0.388752	-1.47683	131	CSF3, SOCS3, LIF, TSLP, BMP6, IL11, IL24, HGF, CAV1, IL6, HBEGF, ITGA5, TNFRSF1A, CLCF1, PDGFB, EHD4, SFRP1, NRG1, RACK1, GHRL, PTPN2, ALKAL2, NEDD9, AFAP1L2, ARHGEF2, PTK2B, PARP14, GPRC5B, IBTK, LRP4, DUSP22, MVP, TNF, STAT3, ABL1, ERRFI1, TSG101, SPINK1, FGF7	Improvers	Unique
GO_REGULATION_OF_DNA_REPLICATION	0.00505027	0.039222	0.407018	-0.463942	-1.58861	66	ACVRL1, STN1, GTPBP4, GLI2, S100A11, CDC7, INO80, STOML2, CDC6, CDK2, TIPIN, RFC4, ORC3, HRAS, CHTF18, DHX9, FAF1, ATR, BCAR3, RFC3, NBN, RFC5, TP53, E2F7, TTF1, ATG7, JUN	Improvers	Unique
GO_CARDIAC_CHAMBER_DEVELOPMENT	0.00512508	0.0395053	0.407018	-0.4388	-1.60096	93	TEK, NRP2, ENG, PRDM1, FOXF1, FHL2, SLIT3, SMAD6, TBX2, TBX3, MIR17HG, MEF2C, SMAD7, NRG1, SEMA3C, TGFBR2, SNX17, NOTCH2, RARA, PARVA, LUZP1, NOTCH1, PDE2A, DLL4, DCTN5, NDST1, UBE4B, ACVR1, EGLN1, TPM1, PCSK5, SALL1, TP53, MAML1, NPRL3	Improvers	Unique
GO_CELL_SUBSTRATE_ADHESION	0.00517898	0.0398214	0.407018	-0.343619	-1.39306	215	TEK, CCR7, SERPINE1, ADAMTS9, ACVRL1, COL5A3, KDR, PPARD, VCL, FOXF1, LAMC3, ITGA5, ITGA10, TNFRSF12A, FERMT2, ABI3BP, ITGA2, ARHGAP6, SPOCK2, ANGPT2, SMAD6, ID1, VWF, MYADM, TYRO3, ILK, PDPN, THBS1, SFRP1, ZYX, EMILIN1, FGB, COL17A1, CCDC80, VCAM1, PXN, ROCK2, NEDD9, MAP4K4, ITGA6	Improvers	Shared
GO_POSITIVE_REGULATION_OF_CELL_CYCLE	0.00540412	0.0413469	0.407018	-0.337673	-1.3708	228	FOSL1, IL1B, SFN, INS, RGCC, FEN1, CDKN1A, APEX1, PLK3, PDGFB, SPHK1, EIF4G1, TBX3, CCNYL1, CCND1, XRCC3, EIF4EBP1, STAT5B, E2F4, CDC7, MAP10, INO80, BTG2, CDC6, CDK2, ROCK2, ZBTB17, RPTOR, BRD4, CNOT9, PHB2, LFNG, DYRK3, SMC5, SIN3A, HCFC1, SSTR5, RARA, AKT1, PAGR1	Improvers	Unique
GO_REGULATION_OF_GROWTH	0.00557065	0.0424111	0.407018	-0.311305	-1.33272	376	FGF2, SOCS3, SFN, GAP43, SEMA7A, ACVRL1, MT2A, INS, PPARD, S100A8, HBEGF, FOXS1, IL17RB, TNFRSF12A, PRSS2, CDKN1A, ATAD3A, MT1X, GNG4, SPHK1, SLIT3, TBX2, EIF4G1, PHLDA2, SEMA3F, EXOSC2, HAMP, TKT, RUVBL2, REG1A, INHBA, JARID2, DUSP6, ILK, EXOSC4, SOCS2, STAT5B, STAT5A, SFRP1, CXCR4, WWC1, MIR17HG, MEF2C, SMAD7, INO80, ZPR1, RACK1, GHRL, ACTL6A, SEMA3C, PLAA, ENPP1, TRPV2, NEDD9, RPTOR, MT1G, TGF…	Improvers	Unique
GO_CELL_CELL_ADHESION	0.00559835	0.0425034	0.407018	-0.293171	-1.27923	475	PNP, CD93, CCR7, IL1B, BMP6, CAV1, SPARCL1, CLDN14, LRFN5, IL6, ETS1, S100A8, VCL, CDSN, FOXF1, SELE, ITGA5, RGCC, PODXL, LAMA3, ROBO4, PCDHGC3, PCDHB13, PLPP3, IL1RN, NT5E, NEXN, PEAR1, MYH9, PKP1, GTPBP4, ACTB, MYADM, TYRO3, IDO1, CDH5, GLI2, ANXA2, ILK, KRT18, JAK3, BMP2, PCDHB18P, HSPB1, PDPN, PCDHB8, S100A11, STAT5B, EFNB2, PCDHB10, KIFC3, CDH1, SMAD7, CEBPB, FGB, SLC7A1, PCDHB16, IL7R, RUNX…	Improvers	Unique
GO_NEGATIVE_REGULATION_OF_DNA_BIOSYNTHETIC_PROCESS	0.00561028	0.0425034	0.407018	-0.656329	-1.76547	20	ACVRL1, CDKN1A, STN1, HNRNPA1, NAT10, DNAJC2, ANKRD1	Improvers	Unique
GO_AMINE_METABOLIC_PROCESS	0.00572362	0.0431327	0.407018	-0.440025	-1.51464	68	PSMC3, INS, PSME2, PSMD14, PSMD7, PSMD4, PSMB7, PSMD3, PSMB3, PSMB6, PSMC5, PSMB5, IDO1, SMOX, PSMC2, ABCC2, PSMD6, VCAM1	Improvers	Shared
GO_EXTRINSIC_APOPTOTIC_SIGNALING_PATHWAY_VIA_DEATH_DOMAIN_RECEPTORS	0.00573521	0.0431327	0.407018	-0.466235	-1.57865	63	SERPINE1, HGF, TNFAIP3, TNFRSF1A, ITPRIP, THBS1, BAG3, SFRP1, FGB, FAS, ARHGEF2, TNFRSF10A, DAXX, BCL2L1, FADD, FAF1, TNF, STX4, RAF1	Improvers	Unique
GO_POSITIVE_REGULATION_OF_MITOTIC_CELL_CYCLE	0.00581877	0.0436549	0.407018	-0.425758	-1.57092	97	IL1B, INS, RGCC, APEX1, PDGFB, SPHK1, EIF4G1, CCND1, XRCC3, EIF4EBP1, STAT5B, CDC7, CDC6, RPTOR, BRD4, PHB2, SMC5, SIN3A, AKT1, ABL1, NUP62	Improvers	Shared
GO_POSITIVE_REGULATION_OF_GLIOGENESIS	0.00584962	0.0437801	0.407018	-0.531901	-1.63591	38	LIF, IL1B, IL6, CLCF1, PRMT5, BMP2, CXCR4, RELA, NOTCH1, TNF, RHEB, PRPF19, MTOR, SERPINE2	Improvers	Unique
GO_ESTABLISHMENT_OR_MAINTENANCE_OF_CELL_POLARITY	0.00596974	0.0444638	0.407018	-0.388262	-1.49092	140	TEK, CCR7, FOXF1, MYH9, LMNA, ACTB, CDH5, DST, RHOF, ILK, WDR1, WWC1, GBF1, MAP4, SPRY2, RACK1, BCCIP, ROCK2, MPP5, CAP1, PARD3, RND1, ARHGEF2, AMOTL2, PTK2B, CFL1, ARF4, SDCCAG8, PARVA, MTCL1, ITGB1, MAP1B, FSCN2, FOXJ1, WNT7B, MAPKAP1, WEE1, LAMA1, CLIC4, AMOTL1	Improvers	Unique
GO_POSITIVE_REGULATION_OF_DNA_BINDING_TRANSCRIPTION_FACTOR_ACTIVITY	0.00607196	0.0451164	0.407018	-0.359453	-1.40258	161	CSF3, FOSL1, IL1B, CAV1, TRAF1, IL6, INS, S100A8, RGCC, PLPP3, SPHK1, TNFRSF11A, ANXA3, TRIM27, RPS27A, DHX33, RIPK3, MYD88, IRAK1, RPS6KA4, ALK, IKBKG, RIPK4, ARHGEF2, PHB2, NFKB1, RNF25, UBE2N, RELA, RPS3, AKT1, DHX9, UBC, IRAK3, UBA52, TNF, ROR1, TAF12, STAT3	Improvers	Unique
GO_REGULATION_OF_ACTIN_FILAMENT_BASED_MOVEMENT	0.00611005	0.0452906	0.407018	-0.650852	-1.68009	18	CAV1, PDE4B, STC1, PDPN	Improvers	Unique
GO_MUSCLE_STRUCTURE_DEVELOPMENT	0.00613534	0.0453564	0.407018	-0.316372	-1.34121	331	FGF2, LIF, S1PR1, EHD1, EDNRB, CAV1, TEAD4, ENG, FLNC, PPARD, HBEGF, FOXF1, TMEM204, MYH9, FHL2, EHD2, PLEKHO1, PDGFB, LMOD1, LMNA, TBX2, PDLIM4, DNMT1, TBX3, PDLIM7, CSRP3, HAMP, JARID2, ILK, BMP2, WDR1, KRT19, EFNB2, EPAS1, ADGRB3, BIN3, MIR17HG, MEF2C, SMAD7, NRG1, VAMP5, BTG2, TMOD1, EMD, FLII, UCHL1, CSRP1, DTYMK, NFATC2, TGFBR2, G6PD, CSRP2, FOS, SELENON, ETV1, TAGLN, FHL3, ANKRD1, RARA, MO…	Improvers	Unique
GO_REGULATION_OF_TELOMERE_MAINTENANCE_VIA_TELOMERE_LENGTHENING	0.00651207	0.0478119	0.407018	-0.555878	-1.6906	34	STN1, HNRNPA1, DKC1, PARP1, CCT2, NAT10, CCT6A, CCT7, CCT3, XRCC5, SMG6, ATR	Improvers	Unique
GO_NCRNA_3_END_PROCESSING	0.00662387	0.0484424	0.407018	-0.61696	-1.73899	25	EXOSC2, DKC1, EXOSC4, RPS21, EXOSC8, TOE1, ELAC2, ERI1, INTS1, SSB, USB1, POLR3K, INTS7, INTS5, EXOSC7, TUT1	Improvers	Shared
GO_NEGATIVE_REGULATION_OF_EPITHELIAL_CELL_MIGRATION	0.00662929	0.0484424	0.407018	-0.514785	-1.62775	43	FGF2, ADAMTS9, ACVRL1, STC1, RGCC, ANGPT2, THBS1, MEF2C, APOH, NOTCH1, TNF, STARD13, ATP2B4, DLL4, TACSTD2, STRAP, GADD45A	Improvers	Unique
GO_DNA_REPLICATION_INITIATION	0.0066483	0.0484667	0.407018	-0.598867	-1.67441	24	MCM5, MCM4, CDC34, LRWD1, POLA1, POLA2, CDC6, CDK2, ORC3, POLE4, MCM2, NBN	Improvers	Shared
GO_HEART_TRABECULA_MORPHOGENESIS	0.00679101	0.0493293	0.407018	-0.646362	-1.69779	19	TEK, S1PR1, ENG, FHL2, NRG1	Improvers	Unique
GO_POSITIVE_REGULATION_OF_GLIAL_CELL_DIFFERENTIATION	0.00679854	0.0493293	0.407018	-0.597859	-1.67159	24	LIF, CLCF1, PRMT5, BMP2, CXCR4, RELA, NOTCH1, RHEB, PRPF19, MTOR, SERPINE2	Improvers	Unique
GO_PEPTIDYL_SERINE_MODIFICATION	0.00682026	0.049371	0.407018	-0.334157	-1.3369	203	CSF3, LIF, IL11, IL24, HGF, CAV1, IL6, GALNT2, PDGFB, SPOCK2, EIF4G1, FNIP2, NTMT1, ILK, PARP1, CDC7, SMAD7, SPRY2, RACK1, RPS6KA4, PWP1, BDKRB2, CDK2, ROCK2, RPTOR, TXN, CNOT9, TGFBR2, SH2D3A, INPP5K, DYRK3, RAMP3, AKT1, CLSPN, MAD2L2, ARAF, ATR, BCAR3, TNF	Improvers	Unique
GO_AMIDE_BIOSYNTHETIC_PROCESS	1e-10	7e-09	NA	-0.607069	-2.84673	438	EEF1B2, RPL39, RPL35, RPS2, RPS9, RPL10A, RPS18, RPL12, RPL29, RPL41, RPL13, RPL32, RPL18, RPL18A, RPL10, RPS8, RGS2, RPL7, EIF4EBP1, RPLP0, RPS6, RPL36, RACK1, RPL24, RPS7, RPL37, RPS5, RPS29, RPL11, RPS21, RPL14, EIF3D, RPSA, BCL3, RPS24, RPS14, RPS16, RPL37A, RPS12, EEF1D, VIM, RPS15, RPL34, EEF1A1P5, RPL36AL, RPL31, RPLP2, EIF5A, RPL27, RPS27A, RPL27A, RPL35A, RPL9, RPS19, RPL7A, EIF3G, RPL13…	Not Improvers	Unique
GO_CELLULAR_NITROGEN_COMPOUND_CATABOLIC_PROCESS	1e-10	7e-09	NA	-0.606563	-2.7904	331	RPL39, RPL35, RPS2, RPS9, RPL10A, RPS18, RPL12, RPL29, RPL41, RPL13, RPL32, RPL18, RPL18A, RPL10, RPS8, RPL7, PNP, RPLP0, RPS6, RPL36, RPL24, RPS7, RPL37, RPS5, RPS29, RPL11, RPS21, RPL14, RPSA, RPS24, RPS14, RPS16, RPL37A, AHCY, RPS12, VIM, RPS15, RPL34, RPL31, RPLP2, RPL27, RPS27A, PSMB7, RPL27A, RPL35A, RPL9, RPS19, RPL7A, RPL13A, RPL19, RPL4, RPL8, RPS26, RPL6, RPL38, RPL21, RPS28, RPS20, PM2…	Not Improvers	Shared
GO_COTRANSLATIONAL_PROTEIN_TARGETING_TO_MEMBRANE	1e-10	7e-09	NA	-0.888961	-3.51521	86	RPL39, RPL35, RPS2, RPS9, RPL10A, RPS18, RPL12, RPL29, RPL41, RPL13, RPL32, RPL18, RPL18A, RPL10, RPS8, RPL7, RPLP0, RPS6, RPL36, RPL24, RPS7, RPL37, RPS5, RPS29, RPL11, RPS21, RPL14, RPSA, RPS24, RPS14, RPS16, RPL37A, RPS12, RPS15, RPL34, RPL31, RPLP2, RPL27, RPS27A, RPL27A, RPL35A, RPL9, RPS19, RPL7A, RPL13A, RPL19, RPL4, RPL8, RPS26, RPL6, RPL38, RPL21, RPS28, RPS20, RPL23, RPS4X, RPS3A, RPL23…	Not Improvers	Shared
GO_CYTOPLASMIC_TRANSLATION	1e-10	7e-09	NA	-0.771878	-2.96111	70	RPL39, RPL10A, RPL29, RPL41, RPL32, RPL18, RPL18A, EIF4EBP1, RPLP0, RPL36, RPL24, RPS29, RPL11, RPS21, EIF3D, RPSA, RPL31, RPL35A, RPL9, EIF3G, RPL13A, RPL19, RPL8, RPS26, RPL6, RPL38, RPS28, EIF3I, EEF2, RPLP0P6, RPL30, RPS23, RPL26, RPL22L1, DPH2, YBX3, EIF3M, EIF3B, FTSJ1, EIF3L, EIF3C, EIF3H, EIF4H, EIF3K, EIF3E, EIF2B3, EIF4G1, EIF3F, EIF4B	Not Improvers	Shared
GO_ESTABLISHMENT_OF_PROTEIN_LOCALIZATION_TO_ENDOPLASMIC_RETICULUM	1e-10	7e-09	NA	-0.864376	-3.46227	95	RPL39, RPL35, RPS2, RPS9, RPL10A, RPS18, RPL12, RPL29, RPL41, RPL13, RPL32, RPL18, RPL18A, RPL10, RPS8, RPL7, RPLP0, RPS6, RPL36, RPL24, RPS7, RPL37, RPS5, RPS29, RPL11, RPS21, RPL14, RPSA, RPS24, RPS14, RPS16, RPL37A, RPS12, RPS15, RPL34, RPL31, RPLP2, RPL27, RPS27A, RPL27A, RPL35A, RPL9, RPS19, RPL7A, RPL13A, RPL19, RPL4, RPL8, RPS26, RPL6, RPL38, RPL21, RPS28, RPS20, RPL23, RPS4X, RPS3A, RPL23…	Not Improvers	Shared
GO_ESTABLISHMENT_OF_PROTEIN_LOCALIZATION_TO_MEMBRANE	1e-10	7e-09	NA	-0.60502	-2.68199	217	RPL39, RPL35, RPS2, RPS9, RPL10A, RPS18, RPL12, RPL29, RPL41, RPL13, RPL32, RPL18, RPL18A, RPL10, RPS8, RPL7, RPLP0, RPS6, RPL36, RACK1, RPL24, RPS7, RPL37, RPS5, RPS29, RPL11, RPS21, RPL14, RPSA, RPS24, RPS14, RPS16, RPL37A, RPS12, RPS15, RPL34, RPL31, RPLP2, RPL27, RPS27A, RPL27A, RPL35A, RPL9, RPS19, RPL7A, RPL13A, RPL19, RPL4, RPL8, RPS26, RPL6, RPL38, RPL21, RPS28, RPS20, RPL23, RPS4X, RPS3A…	Not Improvers	Shared
GO_ESTABLISHMENT_OF_PROTEIN_LOCALIZATION_TO_ORGANELLE	1e-10	7e-09	NA	-0.553364	-2.54573	326	RPL39, FERMT1, RPL35, RPS2, RPS9, RPL10A, RPS18, RPL12, RPL29, RPL41, RPL13, RPL32, RPL18, RPL18A, RPL10, RPS8, RPL7, RPLP0, RPS6, RPL36, RPL24, RPS7, RPL37, RPS5, RPS29, RPL11, RPS21, RPL14, RPSA, RPS24, RPS14, RPS16, RPL37A, RPS12, RPS15, RPL34, RPL31, RPLP2, RPL27, RPS27A, RPL27A, RPL35A, RPL9, RPS19, RPL7A, PHB2, RPL13A, RPL19, RPL4, RPL8, RPS26, RPL6, RPL38, RPL21, RPS28, HK1, RPS20, RPL23, …	Not Improvers	Shared
GO_MITOCHONDRIAL_GENE_EXPRESSION	1e-10	7e-09	NA	-0.595374	-2.38341	93	MRPL11, C1QBP, GADD45GIP1, RPUSD4, DAP3, MRPL37, HSD17B10, MRPL20, NOA1, MRPS12, AURKAIP1, MRPL10, PUS1, MALSU1, MRPL4, MRPL3, MRPL52, MRPL24, TWNK, MRPL51, TUFM, MRPL14, MRPS18C, MRPL15, MRPS22, MRPS27, MRPS2, MRRF, MRPS34, MRPS23, MRPL9, TBRG4, MRPL45, MRPL54, MRPL47, MRPS18A, TFB2M, MRPL22, MRPS28, ELAC2, SHMT2, POLRMT, MRPL39, MRPL40, MRPL36, MRPS33, MRPL57, MRPS7, FASTKD2	Not Improvers	Shared
GO_MRNA_METABOLIC_PROCESS	1e-10	7e-09	NA	-0.622118	-2.93051	461	RPL39, RPL35, RPS2, RPS9, RPL10A, RPS18, RPL12, RPL29, RPL41, RPL13, RPL32, RPL18, RPL18A, RPL10, RPS8, RPL7, SNRPA, RPLP0, RPS6, RPL36, RPL24, RPS7, RPL37, RPS5, RPS29, RPL11, RPS21, RPL14, RPSA, RPS24, RPS14, RPS16, RPL37A, RPS12, VIM, RPS15, RPL34, RPL31, RPLP2, RPL27, RPS27A, PSMB7, RPL27A, RPL35A, RPL9, RPS19, HNRNPA1, SNRPF, RPL7A, RPL13A, RPL19, RPL4, RPL8, RPS26, RPL6, RPL38, RPL21, RPS28…	Not Improvers	Unique
GO_MRNA_PROCESSING	1e-10	7e-09	NA	-0.515091	-2.32086	261	SNRPA, HNRNPA1, SNRPF, PABPC1, EIF4A3, SNRPE, HNRNPM, SNRPD2, DDX39A, C1QBP, SRSF7, SNRPB, CLNS1A, SART1, ZFP36L1, PRMT5, LSM5, AURKAIP1, ALYREF, RBM3, SRSF2, EFTUD2, SNRPC, SNRPD1, THOC5, HNRNPR, PRPF38A, SF3B4, PDCD11, CD2BP2, CTNNBL1, PUF60, GTF2F1, RBM42, YBX1, DDX23, PTBP1, SRRT, RBMX, SAFB, SNRNP40, AAR2, PHRF1, LSM2, PRPF6, PCBP1, LSM7, KHDRBS1, SSU72, DDX46, HNRNPF, CLP1, SF3A3, SF3A2, LS…	Not Improvers	Shared
GO_NCRNA_METABOLIC_PROCESS	1e-10	7e-09	NA	-0.604292	-2.72828	271	RPL35, RPS2, RPS9, RPL10A, RPS8, RPL7, RPS6, RPS7, NOP53, RPL11, RPS21, RPL14, RPS24, RPS14, RPS16, RPS15, NOB1, RPL27, RPL35A, RPS19, RPL7A, RPS28, MRTO4, WDR4, NHP2, PES1, FBL, URM1, EIF4A3, RPL5, RRS1, RAN, THG1L, PPA1, RPL26, DDX54, NSA2, BOP1, METTL1, EXOSC5, RPUSD4, PA2G4, WDR3, SART1, HSD17B10, RPS27, EIF6, TPRKB, LAS1L, FTSJ3, HEATR1, SND1, NOP56, AIMP2, TRIR, POP4, FAM207A, RSL1D1, PUS1,…	Not Improvers	Shared
GO_NCRNA_PROCESSING	1e-10	7e-09	NA	-0.636725	-2.83769	227	RPL35, RPS2, RPS9, RPL10A, RPS8, RPL7, RPS6, RPS7, NOP53, RPL11, RPS21, RPL14, RPS24, RPS14, RPS16, RPS15, NOB1, RPL27, RPL35A, RPS19, RPL7A, RPS28, MRTO4, WDR4, NHP2, PES1, FBL, URM1, EIF4A3, RPL5, RRS1, THG1L, RPL26, DDX54, NSA2, BOP1, METTL1, EXOSC5, RPUSD4, PA2G4, WDR3, SART1, HSD17B10, RPS27, EIF6, TPRKB, LAS1L, FTSJ3, HEATR1, NOP56, POP4, FAM207A, RSL1D1, PUS1, WDR46, FTSJ1, BYSL, PDCD11, E…	Not Improvers	Shared
GO_NUCLEAR_TRANSCRIBED_MRNA_CATABOLIC_PROCESS	1e-10	7e-09	NA	-0.767362	-3.24952	141	RPL39, RPL35, RPS2, RPS9, RPL10A, RPS18, RPL12, RPL29, RPL41, RPL13, RPL32, RPL18, RPL18A, RPL10, RPS8, RPL7, RPLP0, RPS6, RPL36, RPL24, RPS7, RPL37, RPS5, RPS29, RPL11, RPS21, RPL14, RPSA, RPS24, RPS14, RPS16, RPL37A, RPS12, RPS15, RPL34, RPL31, RPLP2, RPL27, RPS27A, RPL27A, RPL35A, RPL9, RPS19, RPL7A, RPL13A, RPL19, RPL4, RPL8, RPS26, RPL6, RPL38, RPL21, RPS28, RPS20, MRTO4, RPL23, RPS4X, RPS3A…	Not Improvers	Shared
GO_NUCLEAR_TRANSCRIBED_MRNA_CATABOLIC_PROCESS_NONSENSE_MEDIATED_DECAY	1e-10	7e-09	NA	-0.872419	-3.5073	97	RPL39, RPL35, RPS2, RPS9, RPL10A, RPS18, RPL12, RPL29, RPL41, RPL13, RPL32, RPL18, RPL18A, RPL10, RPS8, RPL7, RPLP0, RPS6, RPL36, RPL24, RPS7, RPL37, RPS5, RPS29, RPL11, RPS21, RPL14, RPSA, RPS24, RPS14, RPS16, RPL37A, RPS12, RPS15, RPL34, RPL31, RPLP2, RPL27, RPS27A, RPL27A, RPL35A, RPL9, RPS19, RPL7A, RPL13A, RPL19, RPL4, RPL8, RPS26, RPL6, RPL38, RPL21, RPS28, RPS20, RPL23, RPS4X, RPS3A, RPL23…	Not Improvers	Shared
GO_ORGANIC_CYCLIC_COMPOUND_CATABOLIC_PROCESS	1e-10	7e-09	NA	-0.581404	-2.68093	348	RPL39, RPL35, RPS2, RPS9, RPL10A, RPS18, RPL12, RPL29, RPL41, RPL13, RPL32, RPL18, RPL18A, RPL10, RPS8, RPL7, PNP, RPLP0, RPS6, RPL36, RPL24, RPS7, RPL37, RPS5, RPS29, RPL11, RPS21, RPL14, RPSA, RPS24, RPS14, RPS16, RPL37A, AHCY, RPS12, VIM, RPS15, RPL34, RPL31, RPLP2, RPL27, RPS27A, PSMB7, RPL27A, RPL35A, RPL9, RPS19, RPL7A, RPL13A, RPL19, RPL4, RPL8, RPS26, RPL6, RPL38, RPL21, RPS28, RPS20, MRT…	Not Improvers	Shared
GO_PEPTIDE_BIOSYNTHETIC_PROCESS	1e-10	7e-09	NA	-0.648719	-3.01266	379	EEF1B2, RPL39, RPL35, RPS2, RPS9, RPL10A, RPS18, RPL12, RPL29, RPL41, RPL13, RPL32, RPL18, RPL18A, RPL10, RPS8, RGS2, RPL7, EIF4EBP1, RPLP0, RPS6, RPL36, RACK1, RPL24, RPS7, RPL37, RPS5, RPS29, RPL11, RPS21, RPL14, EIF3D, RPSA, BCL3, RPS24, RPS14, RPS16, RPL37A, RPS12, EEF1D, VIM, RPS15, RPL34, EEF1A1P5, RPL36AL, RPL31, RPLP2, EIF5A, RPL27, RPS27A, RPL27A, RPL35A, RPL9, RPS19, RPL7A, EIF3G, RPL13…	Not Improvers	Shared
GO_PEPTIDE_METABOLIC_PROCESS	1e-10	7e-09	NA	-0.569703	-2.67567	449	EEF1B2, RPL39, RPL35, RPS2, RPS9, RPL10A, RPS18, RPL12, RPL29, RPL41, RPL13, RPL32, RPL18, RPL18A, RPL10, RPS8, RGS2, RPL7, EIF4EBP1, RPLP0, RPS6, RPL36, RACK1, RPL24, RPS7, RPL37, RPS5, RPS29, RPL11, RPS21, RPL14, EIF3D, RPSA, BCL3, RPS24, RPS14, RPS16, RPL37A, RPS12, EEF1D, VIM, RPS15, RPL34, EEF1A1P5, RPL36AL, RPL31, RPLP2, EIF5A, RPL27, RPS27A, RPL27A, RPL35A, RPL9, RPS19, RPL7A, EIF3G, RPL13…	Not Improvers	Unique
GO_POSTTRANSCRIPTIONAL_REGULATION_OF_GENE_EXPRESSION	1e-10	7e-09	NA	-0.548701	-2.51936	325	RPS9, RPL10, RGS2, EIF4EBP1, RACK1, EIF3D, BCL3, RPS14, VIM, EIF5A, RPS27A, PSMB7, RPL13A, RPL38, EEF2, RPS4X, CDC37, RPS3, RPL30, PSMC3, PABPC1, PSMD2, EIF4A3, RPL5, HNRNPM, RAN, PSMB1, RPL26, UBA52, NPM1, C1QBP, EXOSC5, RPUSD4, THBS1, H19, APEX1, PA2G4, ITGA2, PSME2, PSMD13, DPH2, YBX3, ZFP36L1, PABPC4, CAV1, EIF3B, PSMB3, NUP88, EIF6, PSMD6, PSMC5, PSMD3, PUM3, NUP85, PSMD14, PSMD8, RBM3, MALS…	Not Improvers	Shared
GO_PROTEIN_LOCALIZATION_TO_ENDOPLASMIC_RETICULUM	1e-10	7e-09	NA	-0.823667	-3.40027	111	RPL39, RPL35, RPS2, RPS9, RPL10A, RPS18, RPL12, RPL29, RPL41, RPL13, RPL32, RPL18, RPL18A, RPL10, RPS8, RPL7, RPLP0, RPS6, RPL36, RPL24, RPS7, RPL37, RPS5, RPS29, RPL11, RPS21, RPL14, RPSA, RPS24, RPS14, RPS16, RPL37A, RPS12, RPS15, RPL34, RPL31, RPLP2, RPL27, RPS27A, RPL27A, RPL35A, RPL9, RPS19, RPL7A, RPL13A, RPL19, RPL4, RPL8, RPS26, RPL6, RPL38, RPL21, RPS28, RPS20, RPL23, RPS4X, RPS3A, RPL23…	Not Improvers	Shared
GO_PROTEIN_LOCALIZATION_TO_MEMBRANE	1e-10	7e-09	NA	-0.465448	-2.15989	370	RPL39, RPL35, RPS2, RPS9, RPL10A, RPS18, RPL12, RPL29, RPL41, S100A10, RPL13, RPL32, RPL18, RPL18A, RPL10, RPS8, RPL7, RPLP0, RPS6, RPL36, RACK1, RPL24, RPS7, RPL37, RPS5, MYADM, RPS29, RPL11, RPS21, RPL14, RPSA, RPS24, RPS14, RPS16, RPL37A, RPS12, RPS15, RPL34, RPL31, RPLP2, RPL27, RPS27A, RPL27A, RPL35A, RPL9, RPS19, RPL7A, RPL13A, RPL19, RPL4, RPL8, RPS26, RPL6, RPL38, RPL21, FERMT2, RPS28, RP…	Not Improvers	Unique
GO_PROTEIN_TARGETING	1e-10	7e-09	NA	-0.547218	-2.46473	256	RPL39, RPL35, RPS2, RPS9, RPL10A, RPS18, RPL12, RPL29, RPL41, RPL13, RPL32, RPL18, RPL18A, RPL10, RPS8, RPL7, RPLP0, RPS6, RPL36, RPL24, RPS7, RPL37, RPS5, RPS29, RPL11, RPS21, RPL14, RPSA, RPS24, RPS14, RPS16, RPL37A, RPS12, RPS15, RPL34, RPL31, RPLP2, RPL27, RPS27A, RPL27A, RPL35A, RPL9, RPS19, RPL7A, RPL13A, RPL19, RPL4, RPL8, RPS26, RPL6, RPL38, RPL21, RPS28, RPS20, RPL23, RPS4X, RPS3A, RPL23…	Not Improvers	Unique
GO_PROTEIN_TARGETING_TO_MEMBRANE	1e-10	7e-09	NA	-0.728285	-3.08885	142	RPL39, RPL35, RPS2, RPS9, RPL10A, RPS18, RPL12, RPL29, RPL41, RPL13, RPL32, RPL18, RPL18A, RPL10, RPS8, RPL7, RPLP0, RPS6, RPL36, RPL24, RPS7, RPL37, RPS5, RPS29, RPL11, RPS21, RPL14, RPSA, RPS24, RPS14, RPS16, RPL37A, RPS12, RPS15, RPL34, RPL31, RPLP2, RPL27, RPS27A, RPL27A, RPL35A, RPL9, RPS19, RPL7A, RPL13A, RPL19, RPL4, RPL8, RPS26, RPL6, RPL38, RPL21, RPS28, RPS20, RPL23, RPS4X, RPS3A, RPL23…	Not Improvers	Shared
GO_REGULATION_OF_CELLULAR_AMIDE_METABOLIC_PROCESS	1e-10	7e-09	NA	-0.475415	-2.11936	224	RPS9, RPL10, RGS2, EIF4EBP1, RACK1, EIF3D, BCL3, RPS14, VIM, EIF5A, RPL13A, RPL38, EEF2, RPS4X, RPS3, RPL30, PABPC1, EIF4A3, RPL5, SPHK1, RPL26, NPM1, C1QBP, RPUSD4, SMPD2, THBS1, PA2G4, ITGA2, DPH2, YBX3, ZFP36L1, EIF3B, EIF6, PUM3, RBM3, MALSU1, TCOF1, EIF3C, HNRNPR, EIF3H, CDC123, EIF4H, YBX1, PTBP1, TNFRSF1A, PUS7, EIF3K, EIF2A, NSUN5, EIF2S1, EIF3E, ZNF598, EIF4G1, MRPS27, ZFP36, KHDRBS1, NA…	Not Improvers	Shared
GO_REGULATION_OF_MRNA_CATABOLIC_PROCESS	1e-10	7e-09	NA	-0.595767	-2.41566	103	VIM, RPS27A, PSMB7, PSMC3, PABPC1, PSMD2, HNRNPM, PSMB1, UBA52, NPM1, EXOSC5, APEX1, PSME2, PSMD13, YBX3, ZFP36L1, PABPC4, PSMB3, PSMD6, PSMC5, PSMD3, PSMD14, PSMD8, DHX34, PSMC4, HNRNPR, PSMA7, EXOSC2, SERBP1, PSMB6, EXOSC4, YBX1, EXOSC8, PSMD1, PSMB4, PSMD11, PSME3, EIF4G1, ZFP36, PLEKHN1, PSMB2, HSPB1, PSMD4, HNRNPD, TARDBP, PKP3, TBRG4, ELAVL1, PSMD7, MAPKAPK2, EXOSC9, YWHAZ, HNRNPC, CIRBP, P…	Not Improvers	Shared
GO_REGULATION_OF_MRNA_METABOLIC_PROCESS	1e-10	7e-09	NA	-0.570878	-2.47585	169	SNRPA, VIM, RPS27A, PSMB7, HNRNPA1, PSMC3, PABPC1, PSMD2, HNRNPM, PSMB1, UBA52, NPM1, C1QBP, EXOSC5, SRSF7, APEX1, PSME2, PSMD13, YBX3, ZFP36L1, PABPC4, PSMB3, PSMD6, PSMC5, PSMD3, PSMD14, PSMD8, RBM3, SRSF2, DHX34, PSMC4, HNRNPR, SF3B4, PSMA7, EXOSC2, SERBP1, PUF60, PSMB6, EXOSC4, RBM42, YBX1, EXOSC8, PTBP1, RBMX, PSMD1, SAFB, PSMB4, PSMD11, PSME3, EIF4G1, ZFP36, KHDRBS1, PLEKHN1, PSMB2, HSPB1, …	Not Improvers	Shared
GO_RIBONUCLEOPROTEIN_COMPLEX_BIOGENESIS	1e-10	7e-09	NA	-0.700172	-3.15922	273	RPL35, RPS2, RPS9, RPL10A, RPL12, RPL10, RPS8, RPL7, RPLP0, RPS6, RPL24, RPS7, NOP53, RPS5, RPL11, RPS21, RPL14, EIF3D, RPSA, RPS24, NLE1, RPS14, RPS16, RPS15, NOB1, RPL27, RPL35A, RPS19, SNRPF, RPL7A, EIF3G, RPL13A, RPL6, RPL38, RPS28, EIF3I, NOP16, MRTO4, NHP2, RPL23A, PES1, RPLP0P6, FBL, EIF4A3, RPL5, SNRPE, RRS1, RPL3, SNRPD2, RAN, MRPL11, RPL26, DDX54, NPM1, NSA2, C1QBP, BOP1, EXOSC5, RPUSD4…	Not Improvers	Shared
GO_RIBONUCLEOPROTEIN_COMPLEX_SUBUNIT_ORGANIZATION	1e-10	7e-09	NA	-0.674755	-2.81214	122	RPL12, RPL10, RPLP0, RPL24, NOP53, RPS5, RPL11, EIF3D, RPSA, NLE1, RPS14, RPS15, RPS19, SNRPF, EIF3G, RPL13A, RPL6, RPL38, RPS28, EIF3I, MRTO4, RPL23A, RPLP0P6, RPL5, SNRPE, RRS1, RPL3, SNRPD2, MRPL11, BOP1, SNRPB, RUVBL1, CLNS1A, SART1, RPS27, EIF3M, EIF3B, EIF6, MRPL20, PRMT5, SNRPC, SNRPD1, EIF3L, EIF3C, EIF3H, CD2BP2, PUF60, EIF4H, DDX23, EIF3K, RBMX, EIF3E, AAR2, LSM2, VCP, PRPF6, EIF3F, EIF…	Not Improvers	Shared
GO_RIBOSOMAL_LARGE_SUBUNIT_ASSEMBLY	1e-10	7e-09	NA	-0.840264	-2.63628	25	RPL12, RPL10, RPLP0, RPL24, NOP53, RPL11, NLE1, RPL6, RPL38, MRTO4, RPL23A, RPLP0P6, RPL5, RRS1, RPL3, MRPL11, BOP1, MRPL20	Not Improvers	Unique
GO_RIBOSOMAL_LARGE_SUBUNIT_BIOGENESIS	1e-10	7e-09	NA	-0.781677	-2.91317	60	RPL35, RPL10A, RPL12, RPL10, RPL7, RPLP0, RPL24, NOP53, RPL11, RPL14, NLE1, RPL35A, RPL7A, RPL6, RPL38, NOP16, MRTO4, NHP2, RPL23A, PES1, RPLP0P6, RPL5, RRS1, RPL3, MRPL11, RPL26, NPM1, NSA2, BOP1, EIF6, MRPL20, LAS1L, FTSJ3, RSL1D1, ZNF622, MALSU1, WDR74, NOC2L, GTPBP4, NIFK, NIP7, SURF6, RRP15, RPF2, BRIX1	Not Improvers	Shared
GO_RIBOSOMAL_SMALL_SUBUNIT_BIOGENESIS	1e-10	7e-09	NA	-0.770398	-2.79349	50	RPS8, RPS6, RPS7, RPS5, RPS21, RPSA, RPS24, RPS14, RPS16, RPS15, NOB1, RPS19, RPL38, RPS28, RRS1, NPM1, WDR3, RPS27, HEATR1, FAM207A, WDR46, BYSL, EMG1, NAT10, UTP20, BMS1, LSM6, TBL3, NOP9, SURF6, NOL10, DHX37, SRFBP1, RPP40, RCL1, KRI1, NOL11, RIOK1, UTP6	Not Improvers	Shared
GO_RIBOSOME_ASSEMBLY	1e-10	7e-09	NA	-0.776543	-2.80776	48	RPL12, RPL10, RPLP0, RPL24, NOP53, RPS5, RPL11, RPSA, NLE1, RPS14, RPS15, RPS19, RPL6, RPL38, RPS28, MRTO4, RPL23A, RPLP0P6, RPL5, RRS1, RPL3, MRPL11, NPM1, C1QBP, BOP1, RPS27, EIF6, MRPL20, EIF2A, MRPS2, NIP7, RPF2, BRIX1, DHX37	Not Improvers	Shared
GO_RIBOSOME_BIOGENESIS	1e-10	7e-09	NA	-0.71512	-3.13818	200	RPL35, RPS2, RPS9, RPL10A, RPL12, RPL10, RPS8, RPL7, RPLP0, RPS6, RPL24, RPS7, NOP53, RPS5, RPL11, RPS21, RPL14, RPSA, RPS24, NLE1, RPS14, RPS16, RPS15, NOB1, RPL27, RPL35A, RPS19, RPL7A, RPL6, RPL38, RPS28, NOP16, MRTO4, NHP2, RPL23A, PES1, RPLP0P6, FBL, EIF4A3, RPL5, RRS1, RPL3, RAN, MRPL11, RPL26, DDX54, NPM1, NSA2, C1QBP, BOP1, EXOSC5, RPUSD4, PA2G4, WDR3, SART1, RPS27, NUP88, EIF6, MRPL20, L…	Not Improvers	Shared
GO_RNA_CATABOLIC_PROCESS	1e-10	7e-09	NA	-0.69564	-3.12014	243	RPL39, RPL35, RPS2, RPS9, RPL10A, RPS18, RPL12, RPL29, RPL41, RPL13, RPL32, RPL18, RPL18A, RPL10, RPS8, RPL7, RPLP0, RPS6, RPL36, RPL24, RPS7, RPL37, RPS5, RPS29, RPL11, RPS21, RPL14, RPSA, RPS24, RPS14, RPS16, RPL37A, RPS12, VIM, RPS15, RPL34, RPL31, RPLP2, RPL27, RPS27A, PSMB7, RPL27A, RPL35A, RPL9, RPS19, RPL7A, RPL13A, RPL19, RPL4, RPL8, RPS26, RPL6, RPL38, RPL21, RPS28, RPS20, MRTO4, RPL23, …	Not Improvers	Shared
GO_RNA_SPLICING	1e-10	7e-09	NA	-0.542297	-2.42196	228	SNRPA, HNRNPA1, SNRPF, RPS26, RPS13, PABPC1, EIF4A3, SNRPE, HNRNPM, SNRPD2, DDX39A, C1QBP, SRSF7, SNRPB, CLNS1A, SART1, PRMT5, LSM5, ALYREF, RBM3, SRSF2, EFTUD2, SNRPC, SNRPD1, THOC5, HNRNPR, PRPF38A, SF3B4, CD2BP2, CTNNBL1, PUF60, GTF2F1, RBM42, YBX1, DDX23, PTBP1, SRRT, RBMX, SNRNP40, AAR2, LSM2, PRPF6, PCBP1, LSM7, KHDRBS1, DDX46, HNRNPF, CLP1, SF3A3, SF3A2, LSM6, RBM19, SNRPG, PQBP1, SRSF3, G…	Not Improvers	Shared
GO_RNA_SPLICING_VIA_TRANSESTERIFICATION_REACTIONS	1e-10	7e-09	NA	-0.565124	-2.45581	178	SNRPA, HNRNPA1, SNRPF, PABPC1, EIF4A3, SNRPE, HNRNPM, SNRPD2, DDX39A, C1QBP, SRSF7, SNRPB, CLNS1A, SART1, PRMT5, LSM5, ALYREF, RBM3, SRSF2, EFTUD2, SNRPC, SNRPD1, HNRNPR, PRPF38A, SF3B4, CD2BP2, CTNNBL1, PUF60, GTF2F1, RBM42, YBX1, DDX23, PTBP1, SRRT, RBMX, SNRNP40, AAR2, LSM2, PRPF6, PCBP1, LSM7, KHDRBS1, DDX46, HNRNPF, CLP1, SF3A3, SF3A2, LSM6, RBM19, SNRPG, PQBP1, SRSF3, GTF2F2, HNRNPD, RNPS1,…	Not Improvers	Shared
GO_RRNA_METABOLIC_PROCESS	1e-10	7e-09	NA	-0.696062	-2.97965	155	RPL35, RPS2, RPS9, RPL10A, RPS8, RPL7, RPS6, RPS7, NOP53, RPL11, RPS21, RPL14, RPS24, RPS14, RPS16, RPS15, NOB1, RPL27, RPL35A, RPS19, RPL7A, RPS28, MRTO4, NHP2, PES1, FBL, EIF4A3, RPL5, RRS1, RPL26, DDX54, NSA2, BOP1, EXOSC5, RPUSD4, PA2G4, WDR3, SART1, RPS27, EIF6, LAS1L, FTSJ3, HEATR1, NOP56, TRIR, POP4, FAM207A, RSL1D1, WDR46, BYSL, PDCD11, EXOSC2, IMP4, WDR74, GTPBP4, NOC4L, EXOSC4, LYAR, NO…	Not Improvers	Shared
GO_TRANSLATIONAL_ELONGATION	1e-10	7e-09	NA	-0.644975	-2.52221	80	EEF1B2, RACK1, EEF1D, EEF1A1P5, RPLP2, EIF5A, EEF2, EEF1A1, RPL30, EIF4A3, MRPL11, GADD45GIP1, DAP3, DPH2, MRPL37, MRPL20, MRPS12, AURKAIP1, MRPL10, MRPL4, MRPL3, MRPL52, MRPL24, MRPL51, TUFM, MRPL14, MRPS18C, MRPL15, MRPS22, ZNF598, MRPS27, MRPS2, MRPS34, MRPS23, EIF5AL1, MRPL9, MRPL45, MRPL54, MRPL47, MRPS18A, MRPL22, MRPS28, GTPBP1, MRPL39, MRPL40, EEFSEC, DPH5, MRPL36, MRPS33, MRPL57, MRPS7	Not Improvers	Shared
GO_TRANSLATIONAL_INITIATION	1e-10	7e-09	NA	-0.775555	-3.27839	139	RPL39, RPL35, RPS2, RPS9, RPL10A, RPS18, RPL12, RPL29, RPL41, RPL13, RPL32, RPL18, RPL18A, RPL10, RPS8, RPL7, EIF4EBP1, RPLP0, RPS6, RPL36, RPL24, RPS7, RPL37, RPS5, RPS29, RPL11, RPS21, RPL14, EIF3D, RPSA, RPS24, RPS14, RPS16, RPL37A, RPS12, RPS15, RPL34, RPL31, RPLP2, RPL27, RPS27A, RPL27A, RPL35A, RPL9, RPS19, RPL7A, EIF3G, RPL13A, RPL19, RPL4, RPL8, RPS26, RPL6, RPL38, RPL21, RPS28, EIF3I, RP…	Not Improvers	Shared
GO_VIRAL_GENE_EXPRESSION	1e-10	7e-09	NA	-0.777259	-3.2739	133	RPL39, RPL35, RPS2, RPS9, RPL10A, RPS18, RPL12, RPL29, RPL41, RPL13, RPL32, RPL18, RPL18A, RPL10, RPS8, RPL7, IFITM3, RPLP0, RPS6, RPL36, RPL24, RPS7, RPL37, RPS5, RPS29, RPL11, RPS21, RPL14, EIF3D, RPSA, RPS24, RPS14, RPS16, RPL37A, RPS12, RPS15, RPL34, RPL31, RPLP2, RPL27, RPS27A, RPL27A, RPL35A, RPL9, RPS19, RPL7A, EIF3G, RPL13A, RPL19, RPL4, RPL8, RPS26, RPL6, RPL38, RPL21, RPS28, RPS20, RPL2…	Not Improvers	Shared
GO_MATURATION_OF_SSU_RRNA	1.32436e-10	9.08181e-09	0.826657	-0.756007	-2.61723	37	RPS8, RPS21, RPS14, RPS16, NOB1, RPS19, RPS28, RRS1, WDR3, HEATR1, FAM207A, WDR46, BYSL, NAT10, UTP20, BMS1, LSM6, TBL3, NOP9, NOL10, DHX37, SRFBP1, RPP40, RCL1, KRI1, NOL11, RIOK1, UTP6	Not Improvers	Shared
GO_RNA_LOCALIZATION	2.6784e-10	1.79192e-08	0.814036	-0.547519	-2.28023	121	RPS15, EIF5A, HNRNPA1, NHP2, FBL, EIF4A3, RRS1, DDX39A, RAN, NPM1, SRSF7, CCT3, RUVBL1, ZFP36L1, NUP88, EIF6, CCT7, CCT6A, NUP85, ALYREF, WRAP53, SRSF2, CCT5, THOC5, NUP107, EXOSC2, YBX1, NOL6, NUP160, PRPF6, ZFP36, KHDRBS1, NOP58, SEH1L, NXT1, EIF5AL1, SRSF3, RNPS1, CCT8, NUTF2, NOP9, MX2, NUP37, NUP205, HNRNPA2B1, THOC6, NUP62, ABCE1, CETN2, HSF1, HNRNPU, XPO5, EIF4E, CPSF6, SEC13, POLDIP3	Not Improvers	Shared
GO_REGULATION_OF_HEMATOPOIETIC_STEM_CELL_DIFFERENTIATION	3.19711e-10	2.08802e-08	0.814036	-0.707883	-2.5279	43	PSMB7, PSMC3, PSMD2, PSMB1, PSME2, PSMD13, PSMB3, PSMD6, PSMC5, GATA2, PSMD3, PSMD14, PSMD8, PSMC4, PSMA7, PSMB6, PUS7, PSMD1, PSMB4, PSMD11, PSME3, PSMB2, PSMD4, RUNX1, PSMD7, ABL1, PSMD12, PSME4	Not Improvers	Shared
GO_REGULATION_OF_STEM_CELL_DIFFERENTIATION	4.58449e-10	2.92448e-08	0.814036	-0.667393	-2.46333	55	PSMB7, PSMC3, PSMD2, PSMB1, PSME2, PSMD13, PSMB3, PSMD6, PSMC5, GATA2, LBH, PSMD3, PSMD14, PSMD8, PWP1, PSMC4, PSMA7, PSMB6, PUS7, PSMD1, PSMB4, PSMD11, PSME3, PSMB2, PSMD4, RUNX1, PSMD7, ABL1, PSMD12, PSME4, HNRNPU, PSMF1	Not Improvers	Shared
GO_MITOCHONDRIAL_TRANSLATION	1e-09	5.87955e-08	0.788187	-0.602371	-2.35798	78	MRPL11, C1QBP, GADD45GIP1, RPUSD4, DAP3, MRPL37, MRPL20, NOA1, MRPS12, AURKAIP1, MRPL10, MALSU1, MRPL4, MRPL3, MRPL52, MRPL24, MRPL51, TUFM, MRPL14, MRPS18C, MRPL15, MRPS22, MRPS27, MRPS2, MRRF, MRPS34, MRPS23, MRPL9, MRPL45, MRPL54, MRPL47, MRPS18A, MRPL22, MRPS28, SHMT2, MRPL39, MRPL40, MRPL36, MRPS33, MRPL57, MRPS7, FASTKD2	Not Improvers	Shared
GO_REGULATION_OF_TRANSCRIPTION_FROM_RNA_POLYMERASE_II_PROMOTER_IN_RESPONSE_TO_HYPOXIA	1.09731e-09	6.4e-08	0.788187	-0.703105	-2.51166	44	RPS27A, PSMB7, PSMC3, PSMD2, PSMB1, UBA52, PSME2, PSMD13, PSMB3, PSMD6, PSMC5, PSMD3, PSMD14, PSMD8, PSMC4, PSMA7, PSMB6, PSMD1, PSMB4, PSMD11, PSME3, PSMB2, PSMD4, PSMD7, EPAS1, PSMD12, PSME4	Not Improvers	Shared
GO_TRANSLATIONAL_TERMINATION	1.19034e-09	6.8e-08	0.788187	-0.654675	-2.45027	61	EIF5A, MRPL11, GADD45GIP1, DAP3, MRPL37, MRPL20, MRPS12, AURKAIP1, MRPL10, MRPL4, MRPL3, MRPL52, MRPL24, MRPL51, MRPL14, MRPS18C, MRPL15, MRPS22, MRPS27, MRPS2, MRRF, MRPS34, MRPS23, EIF5AL1, MRPL9, MRPL45, MRPL54, GSPT1, MRPL47, MRPS18A, MRPL22, MRPS28, ABCE1, MRPL39, MRPL40, OGFOD1, MRPL36, MRPS33, MRPL57, MRPS7	Not Improvers	Shared
GO_HEMATOPOIETIC_STEM_CELL_DIFFERENTIATION	1.26742e-09	7.09497e-08	0.788187	-0.666105	-2.42892	51	PSMB7, PSMC3, SRF, PSMD2, PSMB1, PSME2, PSMD13, PSMB3, PSMD6, PSMC5, GATA2, PSMD3, PSMD14, PSMD8, PSMC4, PSMA7, PSMB6, PUS7, PSMD1, PSMB4, PSMD11, PSME3, PSMB2, PSMD4, RUNX1, PSMD7, ABL1, PSMD12, PSME4, ERCC2, PSMF1	Not Improvers	Shared
GO_ANAPHASE_PROMOTING_COMPLEX_DEPENDENT_CATABOLIC_PROCESS	1.8878e-09	1.03564e-07	0.774939	-0.674579	-2.44605	50	RPS27A, PSMB7, PSMC3, PSMD2, PSMB1, UBA52, PSME2, PSMD13, PSMB3, PSMD6, PSMC5, PSMD3, PSMD14, PSMD8, PSMC4, PSMA7, PSMB6, CDK2, PSMD1, PSMB4, PSMD11, PSME3, PSMB2, PSMD4, PSMD7, ANAPC5, PSMD12, PSME4	Not Improvers	Shared
GO_MITOCHONDRIAL_TRANSLATIONAL_TERMINATION	2.26585e-09	1.19912e-07	0.774939	-0.667684	-2.44263	52	MRPL11, GADD45GIP1, DAP3, MRPL37, MRPL20, MRPS12, AURKAIP1, MRPL10, MRPL4, MRPL3, MRPL52, MRPL24, MRPL51, MRPL14, MRPS18C, MRPL15, MRPS22, MRPS27, MRPS2, MRRF, MRPS34, MRPS23, MRPL9, MRPL45, MRPL54, MRPL47, MRPS18A, MRPL22, MRPS28, MRPL39, MRPL40, MRPL36, MRPS33, MRPL57, MRPS7	Not Improvers	Shared
GO_POSITIVE_REGULATION_OF_TRANSLATION	2.2732e-09	1.19912e-07	0.774939	-0.602005	-2.33706	74	RPS9, EIF3D, BCL3, VIM, EIF5A, EEF2, RPS4X, RPL30, PABPC1, EIF4A3, RPL5, RPL26, NPM1, C1QBP, RPUSD4, THBS1, ITGA2, YBX3, EIF6, RBM3, EIF3C, CDC123, NSUN5, EIF3E, EIF4G1, MRPS27, KHDRBS1, NAT10, EIF5AL1, HNRNPD, ELAVL1, PCIF1, EIF2S3, CIRBP, CDK4, RPS6KB2	Not Improvers	Shared
GO_NUCLEAR_TRANSPORT	2.62379e-09	1.35794e-07	0.774939	-0.468988	-2.03992	180	FERMT1, RPS15, EIF5A, HNRNPA1, SNRPF, PHB2, RPL23, EIF4A3, SNRPE, RRS1, SNRPD2, DDX39A, RAN, FLNA, PKIG, NPM1, SRSF7, ANP32B, SNRPB, HMGA1, KPNA7, NUP88, SFN, EIF6, PTPN14, IPO5, NUP85, ALYREF, SRSF2, SNRPD1, LMNA, THOC5, NUP107, TGFB1, APOD, NOL6, SMURF1, NUP160, KHDRBS1, KPNB1, SEH1L, NOLC1, NXT1, SNRPG, SRSF3, RNPS1, TARDBP, NUTF2, NOP9, ELAVL1, MX2, ZPR1, NUP37, NUP205, IPO7, CDH1, GEMIN5, YW…	Not Improvers	Shared
GO_DNA_METABOLIC_PROCESS	2.90437e-09	1.47531e-07	0.774939	-0.385417	-1.79963	421	MYC, NOP53, MCM6, MCM7, MCM5, RPS27A, HNRNPA1, NME1, KIF22, NHP2, PDGFB, RPS3, SSRP1, ISG15, MCM4, RAN, MCM3, SPHK1, UBA52, NPM1, USP43, CCNB1IP1, POLD2, EXOSC5, CIB1, APEX1, CCT3, RUVBL1, HMGA1, CINP, TDP1, ACTL6A, PRMT5, UHRF1, ALKBH2, FGF2, CCT7, INO80C, CCT6A, PSMD14, TATDN1, LOX, CDC34, SFR1, ALYREF, XRCC6, WRAP53, CCT5, TINF2, PARP1, TGFB1, TRIP13, BCCIP, EXOSC4, CDK2, TOP1MT, NABP1, DSCC1,…	Not Improvers	Unique
GO_REGULATION_OF_HEMATOPOIETIC_PROGENITOR_CELL_DIFFERENTIATION	5.8899e-09	2.93746e-07	0.761461	-0.675026	-2.44054	47	PSMB7, PSMC3, PSMD2, PSMB1, PSME2, PSMD13, PSMB3, PSMD6, PSMC5, PDCD2, GATA2, PSMD3, PSMD14, PSMD8, PSMC4, PSMA7, PSMB6, PUS7, PSMD1, PSMB4, PSMD11, PSME3, PSMB2, PSMD4, RUNX1, PSMD7, ABL1, PSMD12, PSME4	Not Improvers	Shared
GO_POSITIVE_REGULATION_OF_CELLULAR_AMIDE_METABOLIC_PROCESS	1.08382e-08	5.30879e-07	0.74774	-0.566002	-2.23094	85	RPS9, RACK1, EIF3D, BCL3, VIM, EIF5A, EEF2, RPS4X, RPL30, PABPC1, EIF4A3, RPL5, RPL26, NPM1, C1QBP, RPUSD4, SMPD2, THBS1, ITGA2, YBX3, EIF6, RBM3, EIF3C, CDC123, TNFRSF1A, NSUN5, EIF3E, EIF4G1, MRPS27, KHDRBS1, NAT10, EIF5AL1, HNRNPD, ELAVL1, PCIF1, RELA, EIF2S3, CIRBP, CDK4, RPS6KB2	Not Improvers	Shared
GO_REGULATION_OF_DNA_TEMPLATED_TRANSCRIPTION_IN_RESPONSE_TO_STRESS	1.21085e-08	5.82697e-07	0.74774	-0.617789	-2.34372	64	RPS27A, PSMB7, PSMC3, PSMD2, PSMB1, UBA52, PSME2, PSMD13, PSMB3, PSMD6, PSMC5, PSMD3, PSMD14, PSMD8, PSMC4, PSMA7, PSMB6, PSMD1, PSMB4, PSMD11, PSME3, PSMB2, ATF4, PSMD4, DNAJB1, PSMD7, EPAS1, RELA, PSMD12, PSME4, HSF1, PSMF1	Not Improvers	Shared
GO_RNA_EXPORT_FROM_NUCLEUS	1.35213e-08	6.28624e-07	0.74774	-0.594566	-2.28329	71	RPS15, EIF5A, HNRNPA1, EIF4A3, RRS1, DDX39A, RAN, NPM1, SRSF7, NUP88, EIF6, NUP85, ALYREF, SRSF2, THOC5, NUP107, NOL6, NUP160, KHDRBS1, SEH1L, NXT1, SRSF3, RNPS1, NOP9, NUP37, NUP205, HNRNPA2B1, THOC6, NUP62, ABCE1, XPO5, EIF4E, CPSF6, SEC13, POLDIP3, CPSF3, LSG1, SRSF9, POM121	Not Improvers	Shared
GO_MITOTIC_CELL_CYCLE	1.5e-08	6.87855e-07	0.733762	-0.362719	-1.71407	489	TUBB6, MYC, EIF4EBP1, NOP53, MCM6, ADAMTS1, NLE1, TUBA1B, MCM7, MCM5, PSMB7, PHB2, KIF22, TUBA1C, PDGFB, PSMC3, PSMD2, RRS1, MCM4, RAN, PSMB1, MCM3, SPHK1, TUBB, FLNA, RPL26, GADD45GIP1, CTDSP2, CIB1, APEX1, PRMT1, PSME2, PSMD13, ZFP36L1, PSMB3, NUP88, SFN, PSMD6, PSMC5, TUBB4B, SPRY2, PRMT5, FGFR1, LPIN1, PSMD3, PSMD14, GFI1, PSMD8, CDC34, AURKAIP1, ANKLE2, SRSF2, LMNA, PSMC4, PSMA7, CFL1, INS, …	Not Improvers	Unique
GO_MATURATION_OF_5_8S_RRNA	3e-08	1.32507e-06	0.719513	-0.764218	-2.39769	25	RPS21, PES1, RRS1, NSA2, BOP1, EIF6, LAS1L, FTSJ3, EXOSC2, EXOSC4, EXOSC8, UTP20, NOP9, EXOSC9, RRP15, RPP40, RCL1, KRI1, URB1	Not Improvers	Shared
GO_PROTEIN_DNA_COMPLEX_SUBUNIT_ORGANIZATION	3.3e-08	1.43476e-06	0.719513	-0.52989	-2.1663	105	MYC, MCM6, MCM7, MCM5, RPS27A, RPL23, POLR1E, PSMC3, MCM4, MCM3, UBA52, NPM1, PTMA, ANP32B, RUVBL1, HMGA1, PSMC5, SMARCD1, GRWD1, HEY2, PSMC4, PARP1, DAXX, NASP, HAT1, POLE3, CENPX, MCM2, BRD2, CENPH, SUPT16H, TAF12, HMGB1, PSME4, CETN2, CENPV, SRCAP, ERCC2, CCNH, MIS18A, SMARCC1, SET, SMARCB1, VPS72	Not Improvers	Shared
GO_REGULATION_OF_CELLULAR_AMINO_ACID_METABOLIC_PROCESS	4.00888e-08	1.71818e-06	0.719513	-0.697695	-2.43087	38	PSMB7, PSMC3, PSMD2, PSMB1, PSME2, PSMD13, PSMB3, PSMD6, PSMC5, PSMD3, PSMD14, PSMD8, PSMC4, ODC1, PSMA7, INS, PSMB6, PSMD1, PSMB4, PSMD11, PSME3, PSMB2, PSMD4, PSMD7, OAZ1, PSMD12, PSME4	Not Improvers	Shared
GO_MORPHOGENESIS_OF_A_POLARIZED_EPITHELIUM	7.36551e-08	3.01546e-06	0.704976	-0.580076	-2.24332	73	MSN, PSMB7, PSMC3, PSMD2, ACTG1, PSMB1, PFN1, ACTB, PSME2, PSMD13, PSMB3, PSMD6, PSMC5, PSMD3, PSMD14, PSMD8, GPC3, PSMC4, PSMA7, PSMB6, SMURF1, ROR1, PSMD1, PSMB4, PSMD11, FOXF1, PSME3, PSMB2, WDR1, PSMD4, PSMD7, ABL1, PSMD12, PSME4, CDC42, PSMF1	Not Improvers	Shared
GO_MATURATION_OF_SSU_RRNA_FROM_TRICISTRONIC_RRNA_TRANSCRIPT_SSU_RRNA_5_8S_RRNA_LSU_RRNA	1.22121e-07	4.92616e-06	0.690132	-0.73519	-2.35975	28	RPS8, RPS21, RPS14, RPS16, RPS19, RRS1, HEATR1, FAM207A, WDR46, BYSL, UTP20, BMS1, TBL3, NOP9, NOL10, DHX37, RPP40, RCL1, KRI1, UTP6	Not Improvers	Shared
GO_INTERLEUKIN_1_MEDIATED_SIGNALING_PATHWAY	1.31e-07	5.208e-06	0.690132	-0.61071	-2.28572	61	RPS27A, PSMB7, PSMC3, PSMD2, PSMB1, UBA52, IL1R2, IRAK1, PSME2, PSMD13, PSMB3, PSMD6, PSMC5, PSMD3, PSMD14, PSMD8, PSMC4, PSMA7, PSMB6, PSMD1, PSMB4, PSMD11, PSME3, PSMB2, PSMD4, PSMD7, MAP3K3, RELA, PSMD12, PSME4	Not Improvers	Shared
GO_ESTABLISHMENT_OF_RNA_LOCALIZATION	1.62652e-07	6.37364e-06	0.690132	-0.520757	-2.11151	103	RPS15, EIF5A, HNRNPA1, EIF4A3, RRS1, DDX39A, RAN, NPM1, SRSF7, ZFP36L1, NUP88, EIF6, NUP85, ALYREF, SRSF2, THOC5, NUP107, YBX1, NOL6, NUP160, ZFP36, KHDRBS1, SEH1L, NXT1, EIF5AL1, SRSF3, RNPS1, NUTF2, NOP9, MX2, NUP37, NUP205, HNRNPA2B1, THOC6, NUP62, ABCE1, CETN2, HSF1, HNRNPU, XPO5, EIF4E, CPSF6, SEC13, POLDIP3, CPSF3, LSG1, SRSF9, POM121	Not Improvers	Shared
GO_NEGATIVE_REGULATION_OF_CELL_CYCLE_G2_M_PHASE_TRANSITION	2.33871e-07	8.90984e-06	0.690132	-0.601429	-2.24224	59	NOP53, PSMB7, PSMC3, PSMD2, PSMB1, PSME2, PSMD13, PSMB3, PSMD6, PSMC5, PSMD3, PSMD14, PSMD8, PSMC4, PSMA7, PSMB6, PSMD1, PSMB4, PSMD11, AVEN, PSME3, PSMB2, PSMD4, UIMC1, PSMD7, PINX1, PSMD12, PSME4, MIIP, PSMF1	Not Improvers	Shared
GO_MATURATION_OF_LSU_RRNA	3.11313e-07	1.16977e-05	0.674963	-0.771135	-2.32767	22	RPL35, RPL10A, RPL7, RPL7A, NHP2, PES1, NSA2, BOP1, EIF6, LAS1L, FTSJ3, RSL1D1, GTPBP4, NIFK, RRP15, RPF2, URB1	Not Improvers	Shared
GO_DNA_REPAIR	4.51631e-07	1.67409e-05	0.674963	-0.399862	-1.8059	266	NOP53, MCM6, MCM7, MCM5, RPS27A, KIF22, RPS3, SSRP1, ISG15, MCM4, MCM3, UBA52, NPM1, USP43, POLD2, CIB1, APEX1, RUVBL1, HMGA1, CINP, TDP1, ACTL6A, UHRF1, ALKBH2, INO80C, PSMD14, SFR1, XRCC6, WRAP53, PARP1, TRIP13, BCCIP, CDK2, NABP1, PPP4C, VCP, NUDT1, UIMC1, GINS4, UFD1, NABP2, XRCC3, FANCA, CENPX, POLR2L, MAD2L2, RNF168, MCM2, ABL1, FANCE, STUB1, RFC4, RAD23A, DOT1L, DDX1, USP10, BARD1, COPS6, …	Not Improvers	Shared
GO_NUCLEAR_EXPORT	5.22331e-07	1.91034e-05	0.659444	-0.504455	-2.05325	104	RPS15, EIF5A, HNRNPA1, EIF4A3, RRS1, DDX39A, RAN, NPM1, SRSF7, ANP32B, NUP88, SFN, EIF6, PTPN14, NUP85, ALYREF, SRSF2, THOC5, NUP107, TGFB1, NOL6, SMURF1, NUP160, KHDRBS1, SEH1L, NXT1, SRSF3, RNPS1, NUTF2, NOP9, NUP37, NUP205, YWHAE, BARD1, HNRNPA2B1, THOC6, NUP62, ABCE1, XPO5, EIF4E, CPSF6, SEC13, POLDIP3, CPSF3, LSG1, SRSF9, POM121, CTDSPL2	Not Improvers	Shared
GO_POSITIVE_REGULATION_OF_CANONICAL_WNT_SIGNALING_PATHWAY	5.55149e-07	2.00365e-05	0.659444	-0.548386	-2.13886	77	SFRP4, NLE1, PSMB7, PSMC3, PSMD2, PSMB1, PSME2, PSMD13, RUVBL1, ILK, CAV1, PSMB3, PSMD6, PSMC5, PSMD3, PSMD14, PSMD8, GPC3, PSMC4, PSMA7, TGFB1, PSMB6, PSMD1, PSMB4, PSMD11, VCP, PSME3, PSMB2, PSMD4, DAPK3, CCAR2, PSMD7, LGR4, GPRC5B, PSMD12, PSME4, CTDNEP1, PSMF1, CSNK1D	Not Improvers	Shared
GO_CELLULAR_RESPONSE_TO_OXYGEN_LEVELS	5.81e-07	2.06975e-05	0.659444	-0.498402	-2.05751	111	MYC, EIF4EBP1, NOP53, RPS27A, PSMB7, PHB2, PSMC3, PSMD2, PSMB1, UBA52, IRAK1, PPARD, CHCHD2, PSME2, PSMD13, ZFP36L1, ENO1, CAV1, PSMB3, PSMD6, PSMC5, PSMD3, PSMD14, PSMD8, LMNA, PSMC4, TRPC6, PSMA7, PSMB6, PSMD1, PSMB4, PSMD11, PSME3, PSMB2, ATF4, PSMD4, PSMD7, TBL2, KCNK3, STUB1, EPAS1, DNMT3B, PSMD12, PSME4, FAM162A	Not Improvers	Shared
GO_HEMATOPOIETIC_PROGENITOR_CELL_DIFFERENTIATION	6.00836e-07	2.11294e-05	0.659444	-0.532096	-2.10406	86	PSMB7, EEF2, KDR, PSMC3, SRF, PSMD2, RRS1, PSMB1, CEBPD, PSME2, PSMD13, PSMB3, PSMD6, PSMC5, PDCD2, GATA2, PSMD3, PSMD14, PSMD8, FST, PSMC4, PSMA7, TGFB1, PSMB6, PUS7, PSMD1, PSMB4, PSMD11, PSME3, PSMB2, ARMC6, PSMD4, RUNX1, PSMD7, FLT4, ABL1, FSTL3, PSMD12, PSME4, ERCC2, PSMF1	Not Improvers	Shared
GO_NEGATIVE_REGULATION_OF_MRNA_METABOLIC_PROCESS	7.57141e-07	2.62891e-05	0.659444	-0.648513	-2.30757	42	PABPC1, C1QBP, SRSF7, YBX3, DHX34, RBM42, YBX1, PTBP1, RBMX, ZFP36, HNRNPD, RNPS1, TARDBP, PKP3, ELAVL1, MAPKAPK2, HNRNPC, BARD1, CIRBP, HNRNPA2B1, SYNCRIP, HNRNPK, SFSWAP, RNF40, HNRNPU, CTR9, VIP	Not Improvers	Unique
GO_REGULATION_OF_CELL_CYCLE_G2_M_PHASE_TRANSITION	8.32548e-07	2.8546e-05	0.659444	-0.489661	-2.02154	112	NOP53, PSMB7, PSMC3, PSMD2, PSMB1, TUBB, NPM1, PSME2, PSMD13, PSMB3, PSMD6, PSMC5, TUBB4B, PSMD3, PSMD14, PSMD8, PSMC4, PSMA7, PSMB6, CDK2, ODF2, TUBG1, PSMD1, PSMB4, PSMD11, AVEN, SSNA1, PSME3, DCTN2, PSMB2, PSMD4, UIMC1, PSMD7, PBX1, YWHAE, PINX1, CDK4, PSMD12, PSME4, CETN2, MIIP, CEP152, PSMF1, CSNK1D	Not Improvers	Shared
GO_ESTABLISHMENT_OF_TISSUE_POLARITY	1.23739e-06	4.08486e-05	0.643552	-0.569662	-2.15615	63	PSMB7, PSMC3, PSMD2, PSMB1, PFN1, PSME2, PSMD13, PSMB3, PSMD6, PSMC5, PSMD3, PSMD14, PSMD8, GPC3, PSMC4, PSMA7, PSMB6, SMURF1, ROR1, PSMD1, PSMB4, PSMD11, PSME3, PSMB2, WDR1, PSMD4, PSMD7, ABL1, PSMD12, PSME4, CDC42, PSMF1	Not Improvers	Shared
GO_NEGATIVE_REGULATION_OF_MITOTIC_CELL_CYCLE	1.26582e-06	4.08486e-05	0.643552	-0.442751	-1.90043	160	NOP53, NLE1, PSMB7, PSMC3, PSMD2, PSMB1, RPL26, GADD45GIP1, CTDSP2, PRMT1, PSME2, PSMD13, ZFP36L1, PSMB3, SFN, PSMD6, PSMC5, PSMD3, PSMD14, PSMD8, AURKAIP1, PSMC4, PSMA7, TGFB1, TRIP13, CTDSP1, PSMB6, CDK2, HRAS, PSMD1, PSMB4, NABP1, PSMD11, AVEN, PSME3, PSMB2, PSMD4, NABP2, ZW10, XRCC3, PSMD7, MAD2L2, ABL1, ZWILCH, PINX1, CDK4, MDC1, PSMD12, PSME4, CARM1, MTBP, BTG2, MIIP, SLFN11, PSMF1, DCLRE1B…	Not Improvers	Shared
GO_RESPONSE_TO_GROWTH_FACTOR	1.388e-06	4.42718e-05	0.643552	-0.377898	-1.72048	307	MT1G, FERMT1, SFRP4, MYC, RACK1, ADAMTS3, MCM7, RPS27A, HNRNPA1, BMP6, ZYX, FERMT2, EEF2, EEF1A1, PDGFB, KDR, SMAD7, PDCD5, EIF4A3, JCAD, HNRNPM, SPHK1, UBA52, TGFB3, EHD1, CIB1, THBS1, ILK, ZFP36L1, CAV1, SPRY2, FGFR1, CHRDL1, PXN, FGF2, LOX, DDIT4, CDC34, FURIN, FST, ITGA3, ITGA5, GPC3, SHC1, NRP2, PARP1, PGF, TGFB1, GTF2F1, RAF1, SMURF1, FGFBP1, PTBP1, MIR17HG, SHISA2, ZFP36, CDH5, HNRNPF, HSP…	Not Improvers	Shared
GO_CYTOKINE_MEDIATED_SIGNALING_PATHWAY	1.76952e-06	5.51567e-05	0.643552	-0.363106	-1.67699	351	MSN, MYC, JUNB, IFITM3, RPLP0, RACK1, SOCS3, VIM, RPS27A, PSMB7, CNN2, LIFR, CDC37, PDGFB, F3, KRT18, PSMC3, ISG15, TNFRSF12A, CISH, PSMD2, IL1RL1, PSMB1, SPHK1, IL32, UBA52, IL1R2, IRAK1, CIB1, IFI6, PLP2, CEBPD, CCL7, PSME2, PSMD13, ILK, CAV1, PSMB3, CCR7, PSMD6, PSMC5, SLIT3, AXL, IL11, IL22RA1, FGF2, PSMD3, PSMD14, GFI1, PSMD8, IRF7, TSLP, MT2A, PLVAP, PSMC4, SHC1, JAGN1, PSMA7, CFL1, MX1, TG…	Not Improvers	Shared
GO_TRANSCRIPTION_BY_RNA_POLYMERASE_I	2.48789e-06	7.66774e-05	0.627257	-0.666677	-2.26939	35	NOP53, POLR1E, ZNRD1, FLNA, CAVIN1, POLR1C, HEATR1, PWP1, CD3EAP, TCOF1, TAF1D, WDR43, ATF4, POLR2L, POLR1B, NOL11, UTP15, POLR2E, ERCC2, CCNH, TTF1, SMARCB1	Not Improvers	Shared
GO_CELL_CYCLE_PHASE_TRANSITION	2.51762e-06	7.67314e-05	0.627257	-0.371677	-1.69602	313	MYC, EIF4EBP1, NOP53, MCM6, ADAMTS1, MCM7, MCM5, PSMB7, PHB2, PSMC3, PSMD2, MCM4, PSMB1, MCM3, TUBB, RPL26, NPM1, CTDSP2, APEX1, PRMT1, PSME2, PSMD13, ZFP36L1, PSMB3, SFN, PSMD6, PSMC5, TUBB4B, PSMD3, PSMD14, GFI1, PSMD8, CDC34, PSMC4, PSMA7, TRIP13, CTDSP1, PSMB6, CDK2, ODF2, TUBG1, PSMD1, PSMB4, PSMD11, AVEN, SSNA1, PSME3, EIF4G1, DCTN2, KHDRBS1, PSMB2, PSMD4, UIMC1, TFAP4, ZW10, NASP, CHMP4B, …	Not Improvers	Shared
GO_STEM_CELL_DIFFERENTIATION	2.6389e-06	7.9544e-05	0.627257	-0.474126	-1.97744	123	PSMB7, SEMA7A, PSMC3, SRF, PSMD2, PSMB1, CORO1C, PSME2, PSMD13, PSMB3, PSMD6, PSMC5, EDNRB, GATA2, LBH, PSMD3, PSMD14, PSMD8, TBX2, PWP1, TCOF1, PSMC4, NRP2, PSMA7, CFL1, LIF, PSMB6, PUS7, PSMD1, PSMB4, PSMD11, PSME3, PSMB2, PSMD4, NOLC1, RUNX1, PSMD7, ABL1, SEMA4B, SOX18, SNAI2, PHF5A, PSMD12, KBTBD8, PSME4, HNRNPU, ERCC2, PSMF1	Not Improvers	Shared
GO_TUMOR_NECROSIS_FACTOR_MEDIATED_SIGNALING_PATHWAY	2.89848e-06	8.54897e-05	0.627257	-0.500279	-2.0033	94	RACK1, PSMB7, KRT18, PSMC3, TNFRSF12A, PSMD2, PSMB1, SPHK1, PSME2, PSMD13, ILK, PSMB3, PSMD6, PSMC5, PSMD3, PSMD14, PSMD8, PLVAP, PSMC4, PSMA7, PSMB6, TNFRSF1A, PSMD1, PSMB4, PSMD11, PSME3, PSMB2, PSMD4, ACTN4, PSMD7, RELA, PSMD12, MAP3K14, RFFL, PSME4, CCDC3	Not Improvers	Shared
GO_NEGATIVE_REGULATION_OF_CELL_CYCLE_PHASE_TRANSITION	3.42808e-06	9.89814e-05	0.627257	-0.456523	-1.90865	129	NOP53, PSMB7, PSMC3, PSMD2, PSMB1, RPL26, CTDSP2, PRMT1, PSME2, PSMD13, ZFP36L1, PSMB3, SFN, PSMD6, PSMC5, PSMD3, PSMD14, PSMD8, PSMC4, PSMA7, TRIP13, CTDSP1, PSMB6, CDK2, PSMD1, PSMB4, PSMD11, AVEN, PSME3, PSMB2, PSMD4, UIMC1, ZW10, XRCC3, PSMD7, MAD2L2, PINX1, CDK4, PSMD12, PSME4, CARM1, BTG2, MIIP, SLFN11, PSMF1, WEE1, NACC2, CNOT9, ZNF207, IK, GADD45A, CASP2, BUB3, ORC1	Not Improvers	Shared
GO_REGULATION_OF_CELLULAR_AMINE_METABOLIC_PROCESS	3.59091e-06	0.000102521	0.627257	-0.597056	-2.15864	47	PSMB7, PSMC3, PSMD2, PSMB1, PSME2, PSMD13, PSMB3, PSMD6, PSMC5, PSMD3, PSMD14, PSMD8, PSMC4, ODC1, PSMA7, INS, PSMB6, PSMD1, PSMB4, PSMD11, PSME3, PSMB2, PSMD4, PSMD7, OAZ1, PSMD12, PSME4	Not Improvers	Shared
GO_REGULATION_OF_RNA_SPLICING	3.62542e-06	0.000102521	0.627257	-0.517757	-2.02676	78	HNRNPA1, RPS26, RPS13, C1QBP, SRSF7, RBM3, SRSF2, SF3B4, PUF60, RBM42, PTBP1, RBMX, KHDRBS1, HNRNPF, RBM19, PQBP1, SRSF3, RNPS1, SLC39A5, ZPR1, CIRBP, HNRNPA2B1, RRP1B, PTBP2, HNRNPK, HABP4, SFSWAP, ZC3H10, RBM17, HNRNPU, MBNL2, IK, SRSF9, TRA2A, KHDRBS3, SAP18, C9orf78, SRSF1, AHNAK, HNRNPH3, HNRNPH1	Not Improvers	Unique
GO_CYTOPLASMIC_TRANSLATIONAL_INITIATION	4.012e-06	0.00011116	0.610527	-0.711578	-2.24644	26	EIF4EBP1, EIF3D, EIF3G, RPL13A, EIF3I, EIF3M, EIF3B, EIF3L, EIF3C, EIF3H, EIF4H, EIF3K, EIF3E, EIF2B3, EIF4G1, EIF3F, EIF4B, EIF3A, EIF2S3, EIF3J	Not Improvers	Unique
GO_CLEAVAGE_INVOLVED_IN_RRNA_PROCESSING	4.208e-06	0.000114282	0.610527	-0.744953	-2.19642	20	RPS21, NOB1, NHP2, RRS1, BOP1, EXOSC2, EXOSC8, UTP20, BMS1, TBL3, NOP9, EXOSC9, RPP40, RCL1, KRI1	Not Improvers	Shared
GO_NIK_NF_KAPPAB_SIGNALING	4.50493e-06	0.000120993	0.610527	-0.495765	-1.98174	92	BCL3, PSMB7, PHB2, RPS3, PSMC3, PSMD2, PSMB1, SPHK1, TRIP6, IRAK1, PSME2, PSMD13, ILK, PSMB3, PSMD6, PSMC5, PSMD3, PSMD14, PSMD8, RIPK3, PSMC4, NLRC3, PSMA7, PSMB6, RELB, PSMD1, PSMB4, PSMD11, PPP4C, PSME3, PSMB2, PSMD4, ALK, ACTN4, PSMD7, RELA, PSMD12, HMGB1, MAP3K14, PSME4	Not Improvers	Shared
GO_RESPONSE_TO_OXYGEN_LEVELS	4.54331e-06	0.000120993	0.610527	-0.409785	-1.80156	202	MYC, EIF4EBP1, NOP53, REG1A, AHCY, RPS27A, PSMB7, PHB2, AGTRAP, TEK, PSMC3, SRF, PSMD2, PSMB1, UBA52, TGFB3, IRAK1, PPARD, THBS1, CHCHD2, ITGA2, PSME2, PSMD13, ZFP36L1, ETS1, ENO1, CAV1, ALAS2, PSMB3, PSMD6, PSMC5, PSMD3, PSMD14, DDIT4, PSMD8, LMNA, PSMC4, TRPC6, PSMA7, PGF, LDHA, RAF1, PSMB6, PSMD1, PSMB4, PSMD11, PSME3, PLEKHN1, PSMB2, ATF4, PSMD4, OXTR, ACTN4, PSMD7, TBL2, KCNK3, HMOX2, STUB1,…	Not Improvers	Shared
GO_SPLICEOSOMAL_SNRNP_ASSEMBLY	5.21036e-06	0.000137423	0.610527	-0.721066	-2.20944	23	SNRPF, SNRPE, SNRPD2, SNRPB, CLNS1A, SART1, PRMT5, SNRPC, SNRPD1, CD2BP2, AAR2, LSM2, PRPF6, SNRPG, GEMIN5, TGS1	Not Improvers	Shared
GO_TELOMERE_ORGANIZATION	5.83792e-06	0.000152509	0.610527	-0.553927	-2.10145	64	MYC, HNRNPA1, NHP2, POLD2, APEX1, CCT3, CCT7, CCT6A, XRCC6, WRAP53, CCT5, TINF2, PARP1, NAT10, NABP2, HNRNPD, CCT8, XRCC3, POLE3, HNRNPC, RFC4, DOT1L, PINX1, HNRNPA2B1, RFC1, HNRNPU, USP7, POLE4, DCLRE1B, POLA2, ACD, POLA1, MAPK1	Not Improvers	Shared
GO_MATURATION_OF_5_8S_RRNA_FROM_TRICISTRONIC_RRNA_TRANSCRIPT_SSU_RRNA_5_8S_RRNA_LSU_RRNA	6.433e-06	0.000166469	0.610527	-0.761617	-2.19574	18	RPS21, PES1, RRS1, BOP1, FTSJ3, EXOSC2, EXOSC8, UTP20, NOP9, EXOSC9, RPP40, RCL1, KRI1, URB1, ERI3	Not Improvers	Unique
GO_MRNA_EXPORT_FROM_NUCLEUS	7.62065e-06	0.000195359	0.610527	-0.566426	-2.06544	51	EIF5A, EIF4A3, DDX39A, SRSF7, NUP88, NUP85, ALYREF, SRSF2, THOC5, NUP107, NUP160, SEH1L, NXT1, SRSF3, RNPS1, NUP37, NUP205, HNRNPA2B1, THOC6, NUP62, EIF4E, SEC13, POLDIP3, CPSF3, SRSF9, POM121, SRSF1, FYTTD1, RAE1, POLR2D, DDX19B, UPF2, SLBP	Not Improvers	Shared
GO_NEGATIVE_REGULATION_OF_WNT_SIGNALING_PATHWAY	9.14214e-06	0.000232194	0.593325	-0.460569	-1.8857	107	FERMT1, MDFI, SFRP4, RACK1, PSMB7, PSMC3, PSMD2, PSMB1, PSME2, PSMD13, CAV1, PSMB3, PSMD6, PSMC5, WWTR1, PSMD3, PSMD14, PSMD8, GPC3, PSMC4, PSMA7, PSMB6, PSMD1, PSMB4, SHISA2, PSMD11, PSME3, PSMB2, PSMD4, PSMD7, MAD2L2, TLE3, SNAI2, TMEM131L, C12orf43, PSMD12, PSME4, G3BP1, PSMF1, TMEM88	Not Improvers	Shared
GO_REGULATION_OF_MRNA_SPLICING_VIA_SPLICEOSOME	9.95687e-06	0.000248288	0.593325	-0.563157	-2.05352	51	HNRNPA1, C1QBP, SRSF7, RBM3, SRSF2, SF3B4, PUF60, RBM42, PTBP1, RBMX, KHDRBS1, RBM19, SRSF3, RNPS1, SLC39A5, CIRBP, HNRNPA2B1, HNRNPK, SFSWAP, ZC3H10, RBM17, HNRNPU, MBNL2, IK, SRSF9, TRA2A, KHDRBS3, SAP18, C9orf78, SRSF1	Not Improvers	Unique
GO_MRNA_TRANSPORT	1.02875e-05	0.000254221	0.593325	-0.518873	-2.01433	74	EIF5A, HNRNPA1, EIF4A3, DDX39A, SRSF7, ZFP36L1, NUP88, NUP85, ALYREF, SRSF2, THOC5, NUP107, NUP160, ZFP36, SEH1L, NXT1, EIF5AL1, SRSF3, RNPS1, NUTF2, MX2, NUP37, NUP205, HNRNPA2B1, THOC6, NUP62, CETN2, HSF1, EIF4E, SEC13, POLDIP3, CPSF3, SRSF9, POM121	Not Improvers	Shared
GO_REGULATION_OF_MRNA_PROCESSING	1.05936e-05	0.000259448	0.593325	-0.523289	-2.02371	73	SNRPA, HNRNPA1, C1QBP, SRSF7, ZFP36L1, RBM3, SRSF2, SF3B4, PUF60, RBM42, PTBP1, RBMX, SAFB, KHDRBS1, RBM19, SRSF3, RNPS1, SLC39A5, BARD1, CIRBP, HNRNPA2B1, HNRNPK, SFSWAP, ZC3H10, RBM17, RNF40, HSF1, HNRNPU, MBNL2, CPSF6, CTR9, SLTM, IK, SRSF9, TRA2A, KHDRBS3, SAP18, C9orf78, PAF1, SRSF1	Not Improvers	Unique
GO_MULTI_ORGANISM_LOCALIZATION	1.39306e-05	0.000335189	0.593325	-0.65769	-2.16897	31	RPS27A, RAN, UBA52, CAV1, NUP88, NUP85, NUP107, NUP160, KPNB1, SEH1L, VPS37C, VPS37B, VPS28, NUP37, NUP205, IFIT1, KPNA2, NUP62	Not Improvers	Shared
GO_IMPORT_INTO_NUCLEUS	1.42618e-05	0.000340176	0.593325	-0.493152	-1.93587	83	FERMT1, HNRNPA1, SNRPF, PHB2, RPL23, SNRPE, SNRPD2, RAN, FLNA, PKIG, SNRPB, KPNA7, NUP88, IPO5, NUP85, SNRPD1, LMNA, NUP107, TGFB1, APOD, KPNB1, NOLC1, NXT1, SNRPG, TARDBP, NUTF2, ELAVL1, ZPR1, IPO7, CDH1, GEMIN5, KPNA2, NUP62	Not Improvers	Shared
GO_CELL_CYCLE_G2_M_PHASE_TRANSITION	1.49431e-05	0.000353353	0.593325	-0.427813	-1.81565	147	NOP53, PSMB7, PSMC3, PSMD2, PSMB1, TUBB, NPM1, PSME2, PSMD13, PSMB3, PSMD6, PSMC5, TUBB4B, PSMD3, PSMD14, PSMD8, PSMC4, PSMA7, PSMB6, CDK2, ODF2, TUBG1, PSMD1, PSMB4, PSMD11, AVEN, SSNA1, PSME3, DCTN2, KHDRBS1, PSMB2, PSMD4, UIMC1, PSMD7, FBXL6, PBX1, YWHAE, PINX1, CDK4, PSMD12, PHLDA1, PSME4, CETN2, MIIP, CEP152, PSMF1, CCNH, CSNK1D, WEE1, PLCB1	Not Improvers	Shared
GO_NUCLEOBASE_CONTAINING_COMPOUND_TRANSPORT	1.52867e-05	0.000358387	0.57561	-0.447347	-1.86772	126	RPS15, EIF5A, HNRNPA1, EIF4A3, RRS1, DDX39A, RAN, NPM1, SRSF7, ZFP36L1, NUP88, EIF6, NUP85, ALYREF, SRSF2, THOC5, NUP107, YBX1, NOL6, SLC35A4, NUP160, SLC25A21, ZFP36, KHDRBS1, SEH1L, NXT1, EIF5AL1, SRSF3, RNPS1, NUTF2, NOP9, MX2, NUP37, NUP205, HNRNPA2B1, THOC6, NUP62, ABCE1, CETN2, HSF1, HNRNPU, XPO5, EIF4E, CPSF6, SLC35D2, SEC13, POLDIP3	Not Improvers	Shared
GO_TRNA_METABOLIC_PROCESS	1.56005e-05	0.000362644	0.57561	-0.473823	-1.90966	98	WDR4, URM1, THG1L, PPA1, METTL1, RPUSD4, HSD17B10, TPRKB, AIMP2, POP4, PUS1, FTSJ1, EXOSC2, PUS3, FARSB, EXOSC8, PUS7, POP1, DUS3L, NAT10, CTU2, CLP1, LSM6, FARSA, POP7, EXOSC9, RPP40, QTRT1, DDX1, ELAC2, SLFN11, TYW3, POP5, LCMT2, TSEN54, BCDIN3D, TSEN2, ADAT3, DUS2, RPP38, TRMT13, MOCS3, EEF1E1, CTU1, YARS2, ADAT2, TRMU, TRMT10B	Not Improvers	Shared
GO_DNA_TEMPLATED_TRANSCRIPTION_TERMINATION	1.60561e-05	0.000367015	0.57561	-0.580567	-2.08563	46	SNRPF, POLR1E, SNRPE, ZNRD1, CAVIN1, SNRPB, POLR1C, PRMT5, CD3EAP, TAF1D, SSU72, CLP1, SNRPG, XRN2, POLR2L, MAZ, POLR1B, POLR2E, ERCC2, CCNH, TTF1, SCAF4, CPSF3	Not Improvers	Shared
GO_RNA_3_END_PROCESSING	1.66682e-05	0.000377858	0.57561	-0.529559	-2.02655	69	SNRPA, RPS21, FBL, PABPC1, EIF4A3, DDX39A, EXOSC5, SRSF7, HSD17B10, ZFP36L1, ALYREF, SRSF2, THOC5, EXOSC2, EXOSC4, EXOSC8, SSU72, CLP1, SRSF3, RNPS1, EXOSC9, BARD1, THOC6, ELAC2, RNF40, ERI3, HSF1, INTS12, CPSF6, CTR9, POLDIP3	Not Improvers	Shared
GO_NEGATIVE_REGULATION_OF_CELL_CYCLE_PROCESS	1.73374e-05	0.000384569	0.57561	-0.412275	-1.78067	167	NOP53, PSMB7, RPL23, PSMC3, PSMD2, PSMB1, RPL26, NPM1, CTDSP2, PRMT1, PSME2, PSMD13, ZFP36L1, PSMB3, SFN, PSMD6, PSMC5, UXT, PSMD3, PSMD14, PSMD8, AURKAIP1, PSMC4, PSMA7, TRIP13, LIF, CTDSP1, PSMB6, CDK2, PSMD1, PSMB4, PSMD11, AVEN, PSME3, PSMB2, PSMD4, UIMC1, TFAP4, ZW10, XRCC3, PSMD7, CHMP2A, MAD2L2, PINX1, CDK4, PSMD12, PSME4, CARM1, MTBP, BTG2, MIIP, SLFN11, PSMF1, WEE1, NAA10, NACC2, CNOT9, …	Not Improvers	Shared
GO_REGULATION_OF_CELL_CYCLE_PHASE_TRANSITION	1.73394e-05	0.000384569	0.57561	-0.376625	-1.68205	228	NOP53, ADAMTS1, PSMB7, PHB2, PSMC3, PSMD2, PSMB1, TUBB, RPL26, NPM1, CTDSP2, APEX1, PRMT1, PSME2, PSMD13, ZFP36L1, PSMB3, SFN, PSMD6, PSMC5, TUBB4B, PSMD3, PSMD14, PSMD8, PSMC4, PSMA7, TRIP13, CTDSP1, PSMB6, CDK2, ODF2, TUBG1, PSMD1, PSMB4, PSMD11, AVEN, SSNA1, PSME3, EIF4G1, DCTN2, PSMB2, PSMD4, UIMC1, TFAP4, ZW10, XRCC3, PSMD7, PBX1, MAD2L2, YWHAE, CCND2, PINX1, CDK4, ANAPC5, PSMD12, PSME4, CAR…	Not Improvers	Shared
GO_ANTIGEN_PROCESSING_AND_PRESENTATION_OF_EXOGENOUS_PEPTIDE_ANTIGEN_VIA_MHC_CLASS_I	1.73848e-05	0.000384569	0.57561	-0.574058	-2.07549	47	PSMB7, PSMC3, PSMD2, PSMB1, PSME2, PSMD13, PSMB3, PSMD6, PSMC5, PSMD3, PSMD14, PSMD8, PSMC4, PSMA7, PSMB6, PSMD1, PSMB4, PSMD11, PSME3, PSMB2, PSMD4, PSMD7, TAP2	Not Improvers	Shared
GO_CELLULAR_RESPONSE_TO_DNA_DAMAGE_STIMULUS	2.00629e-05	0.00044026	0.57561	-0.33352	-1.55458	408	MYC, NOP53, MCM6, BCL3, MCM7, MCM5, RPS27A, KIF22, WDR4, RPS3, MICA, SSRP1, ISG15, MCM4, MCM3, RPL26, UBA52, NPM1, USP43, POLD2, CIB1, APEX1, PRMT1, RUVBL1, HMGA1, CINP, SFN, TDP1, ACTL6A, UHRF1, FNIP2, ALKBH2, INO80C, PSMD14, DDIT4, SFR1, XRCC6, IRF7, WRAP53, ALKBH7, THOC5, PARP1, TRIP13, BCCIP, CDK2, TNFRSF1A, CIDEB, NABP1, TMEM109, PPP4C, VCP, NUDT1, UIMC1, GINS4, UFD1, NABP2, TFAP4, XRCC3, PO…	Not Improvers	Unique
GO_TISSUE_MORPHOGENESIS	2.20312e-05	0.000479615	0.57561	-0.361371	-1.63279	276	MSN, MYC, RPS7, SOCS3, PSMB7, PHB2, VCL, KDR, SMAD7, PSMC3, SRF, PSMD2, ACTG1, PSMB1, FLNA, PFN1, EFNB2, ACTB, STARD13, ITGA2, PSME2, PSMD13, ILK, PSMB3, PSMD6, PSMC5, SPRY2, FGFR1, PODXL, FGF2, PSMD3, PSMD14, PSMD8, TBX2, MTHFD1L, NF2, VASP, HEY2, FST, ITGA3, ITGA5, GPC3, PSMC4, NRP2, PSMA7, CFL1, PGF, TGFB1, LIF, PSMB6, SMURF1, ROR1, PSMD1, PSMB4, PSMD11, FOXF1, PSME3, PSMB2, NOTCH4, WDR1, PSMD…	Not Improvers	Shared
GO_DNA_REPLICATION	2.41789e-05	0.000522226	0.57561	-0.43541	-1.83798	134	MCM6, MCM7, MCM5, SSRP1, MCM4, MCM3, POLD2, HMGA1, CINP, FGFR1, GRWD1, CDC34, ALYREF, TNFAIP1, ID3, NFIC, GTPBP4, CDK2, TWNK, TOP1MT, HRAS, DSCC1, GINS4, NASP, POLE3, CENPX, BCAR3, MCM2, ZPR1, RFC4, BARD1, RRM1, SDE2, SUPT16H, FAF1, WDR18, PTMS, LIG3, RFC1, CDC42, SLFN11, POLE4, MCM9, TTF1, RTF2, POLA2, SET, POLA1, ATRIP	Not Improvers	Shared
GO_NEGATIVE_REGULATION_OF_CANONICAL_WNT_SIGNALING_PATHWAY	2.62442e-05	0.000562406	0.57561	-0.478352	-1.90544	89	FERMT1, SFRP4, PSMB7, PSMC3, PSMD2, PSMB1, PSME2, PSMD13, CAV1, PSMB3, PSMD6, PSMC5, WWTR1, PSMD3, PSMD14, PSMD8, GPC3, PSMC4, PSMA7, PSMB6, PSMD1, PSMB4, PSMD11, PSME3, PSMB2, PSMD4, PSMD7, MAD2L2, TLE3, SNAI2, TMEM131L, PSMD12, PSME4, G3BP1, PSMF1, TMEM88	Not Improvers	Shared
GO_FC_EPSILON_RECEPTOR_SIGNALING_PATHWAY	2.65513e-05	0.000564575	0.57561	-0.523986	-2.00882	67	PSMB7, PSMC3, PSMD2, PSMB1, PSME2, PSMD13, PSMB3, PSMD6, PSMC5, PSMD3, PSMD14, PSMD8, PSMC4, SHC1, PSMA7, PSMB6, PSMD1, PSMB4, PSMD11, PSME3, PSMB2, PSMD4, PSMD7, RELA, PSMD12, PSME4	Not Improvers	Shared
GO_CELLULAR_PROTEIN_COMPLEX_DISASSEMBLY	2.7137e-05	0.00057259	0.57561	-0.450108	-1.8603	115	EIF5A, MRPL11, GADD45GIP1, CIB1, DAP3, MRPL37, MRPL20, MRPS12, SH3GL1, AURKAIP1, MRPL10, MID1IP1, MRPL4, NAV3, MRPL3, CFL1, MRPL52, MRPL24, MRPL51, MRPL14, MRPS18C, FLII, MRPL15, MRPS22, MRPS27, DSTN, MRPS2, WDR1, MRRF, MRPS34, MRPS23, EIF5AL1, MRPL9, MRPL45, MRPL54, GSPT1, ADD2, TMOD1, MRPL47, MRPS18A, LMOD1, MRPL22, MRPS28, ABCE1, MRPL39, MRPL40, OGFOD1, MRPL36, MRPS33, TMOD3, MRPL57, MRPS7	Not Improvers	Shared
GO_EPITHELIUM_DEVELOPMENT	2.86404e-05	0.000586273	0.57561	-0.3187	-1.5076	499	FERMT1, MSN, SFRP4, MYC, SERPINE1, RPS7, MYADM, SOCS3, NLE1, EDF1, VIM, PSMB7, BMP6, PHB2, NSDHL, VCL, CELA2A, FRMD6, PDGFB, KDR, KRT18, SMAD7, PSMC3, SRF, GAL, CYP27B1, TAGLN2, PSMD2, ACTG1, PSMB1, FLNA, PFN1, EFNB2, ACTB, STARD13, ITGA2, PSME2, PSMD13, ILK, ZFP36L1, CAV1, PSMB3, SFN, PSMD6, PSMC5, SPRY2, KLF7, WWTR1, LBH, FGFR1, LFNG, PODXL, FGF2, AIMP2, PSMD3, PSMD14, CDSN, PSMD8, TBX2, MTHFD1…	Not Improvers	Unique
GO_NON_CANONICAL_WNT_SIGNALING_PATHWAY	2.93023e-05	0.000595379	0.57561	-0.508471	-1.96641	73	SFRP4, PSMB7, PSMC3, PSMD2, PSMB1, PFN1, PSME2, PSMD13, PSMB3, PSMD6, PSMC5, PSMD3, PSMD14, PSMD8, GPC3, PSMC4, PSMA7, PSMB6, SMURF1, ROR1, PSMD1, PSMB4, PSMD11, PSME3, PSMB2, PSMD4, PSMD7, ABL1, PSMD12, PSME4, CDC42, PSMF1, CSNK1D	Not Improvers	Unique
GO_DNA_BIOSYNTHETIC_PROCESS	3.37153e-05	0.000675044	0.557332	-0.475185	-1.90227	93	MYC, RPS27A, HNRNPA1, NHP2, PDGFB, ISG15, SPHK1, UBA52, USP43, POLD2, CCT3, FGF2, CCT7, CCT6A, LOX, WRAP53, CCT5, TINF2, DSCC1, VCP, NAT10, UFD1, HNRNPD, CCT8, POLE3, PPIA, MAD2L2, HNRNPC, RFC4, USP10, PINX1, HNRNPA2B1, LIG3, RFC1, HNRNPU, POLE4, CHRAC1, ACD, POLA1, MAPK1	Not Improvers	Shared
GO_REGULATION_OF_MORPHOGENESIS_OF_AN_EPITHELIUM	3.9607e-05	0.000770511	0.557332	-0.485112	-1.9121	85	PSMB7, PHB2, PSMC3, PSMD2, PSMB1, PFN1, PSME2, PSMD13, PSMB3, PSMD6, PSMC5, FGFR1, PSMD3, PSMD14, PSMD8, TBX2, GPC3, PSMC4, PSMA7, LIF, PSMB6, SMURF1, ROR1, PSMD1, PSMB4, PSMD11, PSME3, PSMB2, PSMD4, PSMD7, ABL1, SNAI2, LGR4, PSMD12, PSME4, CDC42, PSMF1	Not Improvers	Shared
GO_RRNA_TRANSCRIPTION	4.08544e-05	0.000780124	0.557332	-0.706638	-2.08345	20	NOP53, POLR1E, CAVIN1, PWP1, CD3EAP, TCOF1, GTF3C2, NPM3, NIFK, POLR1B, NOL11, GTF3A, GTF3C5, SMARCB1	Not Improvers	Unique
GO_DNA_CONFORMATION_CHANGE	4.09412e-05	0.000780124	0.557332	-0.433503	-1.80731	130	MCM6, MCM7, MCM5, RPS27A, MCM4, MCM3, UBA52, NPM1, ANP32B, RUVBL1, HMGA1, GRWD1, XRCC6, PARP1, DAXX, NOC2L, TWNK, TOP1MT, DSCC1, GINS4, NASP, GTF2F2, HAT1, POLE3, MBD2, CENPX, MCM2, BRD2, ABL1, RFC4, DDX1, HNRNPA2B1, CENPH, HMGB1, PSME4, CETN2, MBD3, G3BP1, CENPV, ERCC2, DNMT1, MCM9, MIS18A, NAA10, SET	Not Improvers	Shared
GO_GENE_SILENCING	4.12388e-05	0.000780124	0.557332	-0.451895	-1.84643	106	PABPC1, RAN, H19, HMGA1, NUP88, EIF6, SND1, NUP85, NUP107, TGFB1, CDK2, SRRT, NUP160, MIR17HG, EIF4G1, ZFP36, SEH1L, NOTCH4, CLP1, HAT1, ELAVL1, POLR2L, SCMH1, NUP37, NUP205, DOT1L, AC020916.1, HNRNPA2B1, HMGB1, NUP62, MIRLET7BHG, POLR2E, ZC3H10, POLR2I, TDRD1, SRCAP, XPO5, DNMT1, NEAT1, SEC13, CNOT9, PCGF1, DGCR8, BCDIN3D, MAP2K1, POM121, MEG3, SIRT6, IPO8, SMAD3	Not Improvers	Shared
GO_RESPONSE_TO_INTERLEUKIN_1	4.12388e-05	0.000780124	0.557332	-0.451523	-1.84491	106	SELE, RPS27A, PSMB7, PSMC3, PSMD2, PSMB1, UBA52, IL1R2, IRAK1, IGBP1, CCL7, PSME2, PSMD13, ETS1, PSMB3, AKAP12, PSMD6, PSMC5, PSMD3, PSMD14, PSMD8, PSMC4, PSMA7, PSMB6, RBMX, PSMD1, PSMB4, PSMD11, PSME3, PSMB2, PSMD4, GBP1, PSMD7, CACTIN, MAP3K3, USP10, RELA, PSMD12, PSME4, HAS2, PSMF1, ABCC2, PLCB1, OTUB1, CCL3, PELI1, SFRP1	Not Improvers	Shared
GO_SCF_DEPENDENT_PROTEASOMAL_UBIQUITIN_DEPENDENT_PROTEIN_CATABOLIC_PROCESS	4.46626e-05	0.000839105	0.557332	-0.540751	-2.02388	61	PSMB7, PSMC3, PSMD2, PSMB1, PSME2, PSMD13, PSMB3, PSMD6, PSMC5, WWTR1, PSMD3, PSMD14, PSMD8, FBXO2, PSMC4, PSMA7, PSMB6, PSMD1, PSMB4, PSMD11, PSME3, PSMB2, PSMD4, FBXL13, PSMD7, FBXL6	Not Improvers	Shared
GO_POSITIVE_REGULATION_OF_WNT_SIGNALING_PATHWAY	4.59902e-05	0.00085817	0.557332	-0.46543	-1.86792	96	SFRP4, NLE1, PSMB7, PSMC3, PSMD2, PSMB1, PSME2, PSMD13, RUVBL1, ILK, CAV1, PSMB3, PSMD6, PSMC5, PSMD3, PSMD14, PSMD8, GPC3, PSMC4, PSMA7, TGFB1, PSMB6, PSMD1, PSMB4, PSMD11, VCP, PSME3, PSMB2, PSMD4, DAPK3, MBD2, CCAR2, PSMD7, ABL1, LGR4, GPRC5B, PSMD12, PSME4, CTDNEP1, PSMF1, CSNK1D, CSNK2A1	Not Improvers	Shared
GO_TRNA_PROCESSING	5.28321e-05	0.000966123	0.557332	-0.499878	-1.92408	72	WDR4, URM1, THG1L, METTL1, RPUSD4, HSD17B10, TPRKB, POP4, PUS1, FTSJ1, PUS3, PUS7, POP1, DUS3L, NAT10, CTU2, CLP1, LSM6, POP7, RPP40, QTRT1, DDX1, ELAC2, TYW3, POP5, LCMT2, TSEN54, BCDIN3D, TSEN2, ADAT3, DUS2, RPP38, TRMT13, MOCS3, CTU1, ADAT2, TRMU, TRMT10B	Not Improvers	Shared
GO_NEGATIVE_REGULATION_OF_RNA_SPLICING	5.50532e-05	0.000993493	0.557332	-0.724053	-2.08744	18	RPS26, RPS13, C1QBP, SRSF7, RBM42, PTBP1, RBMX, RNPS1, HNRNPA2B1, PTBP2, HNRNPK, SFSWAP	Not Improvers	Unique
GO_NCRNA_TRANSCRIPTION	6.28706e-05	0.00110548	0.538434	-0.564573	-2.04756	49	NOP53, POLR1E, CAVIN1, PWP1, CD3EAP, TCOF1, GTF3C2, GTF2F1, NPM3, SRRT, NABP1, NIFK, NABP2, GTF2F2, POLR2L, INTS11, POLR1B, NOL11, POLR2E, GTF3A, POLR2I, INTS12, GTF3C5, SMARCB1	Not Improvers	Unique
GO_BLASTOCYST_FORMATION	6.84808e-05	0.00119645	0.538434	-0.6606	-2.0726	25	JUNB, NLE1, SRF, CCNB1IP1, ACTL6A, TM4SF1, FURIN, BYSL, WDR74	Not Improvers	Unique
GO_RRNA_MODIFICATION	7.3469e-05	0.00127373	0.538434	-0.697973	-2.05791	20	NHP2, FBL, RPUSD4, FTSJ3, NSUN5, EMG1, NAT10, BUD23, RPUSD2, TFB2M	Not Improvers	Unique
GO_ACTIVATION_OF_INNATE_IMMUNE_RESPONSE	7.39238e-05	0.00127373	0.538434	-0.478949	-1.857	75	PSMB7, PSMC3, PSMD2, PSMB1, PSME2, PSMD13, PSMB3, PSMD6, PSMC5, PSMD3, PSMD14, PSMD8, XRCC6, PSMC4, PSMA7, MUC6, RAF1, PSMB6, RELB, HRAS, PSMD1, PSMB4, PSMD11, PSME3, PSMB2, PSMD4, PQBP1, PSMD7, RELA, PSMD12, HMGB1, CGAS, PSME4, NRAS, PSMF1, NONO	Not Improvers	Unique
GO_FORMATION_OF_CYTOPLASMIC_TRANSLATION_INITIATION_COMPLEX	7.74087e-05	0.00131883	0.538434	-0.76098	-2.06351	15	EIF3D, EIF3G, EIF3I, EIF3M, EIF3B, EIF3L, EIF3C, EIF3H, EIF3K, EIF3E, EIF3F, EIF3A, EIF3J	Not Improvers	Unique
GO_REGULATION_OF_GENE_SILENCING	8.00684e-05	0.00135175	0.538434	-0.557373	-2.00231	46	HMGA1, NUP88, NUP85, NUP107, TGFB1, CDK2, NUP160, EIF4G1, ZFP36, SEH1L, ELAVL1, POLR2L, NUP37, NUP205, NUP62, POLR2E, ZC3H10, POLR2I, XPO5, NEAT1, SEC13, BCDIN3D, MAP2K1, POM121, SIRT6, IPO8, RAE1, POLR2D, ESR1, AGO2, POLR2G, IL6	Not Improvers	Shared
GO_REGULATION_OF_CHOLESTEROL_BIOSYNTHETIC_PROCESS	8.03265e-05	0.00135175	0.538434	-0.662408	-2.09121	26	FDPS, HMGCS1, FDFT1, DHCR7, RAN, SQLE, MVD, HMGCR, SREBF2, MVK, KPNB1, CYP51A1, LSS, ELOVL6	Not Improvers	Unique
GO_MITOTIC_METAPHASE_PLATE_CONGRESSION	8.58982e-05	0.00142799	0.538434	-0.638231	-2.03094	27	KIF22, RRS1, DCTN2, KPNB1, SEH1L, ZW10, CHMP4B, CHMP2A, PINX1, NUP62, CHMP6, HNRNPU	Not Improvers	Unique
GO_REGULATION_OF_LIPID_BIOSYNTHETIC_PROCESS	8.79571e-05	0.00143275	0.538434	-0.472575	-1.86269	85	FDPS, RACK1, HMGCS1, FDFT1, BMP6, DHCR7, PDGFB, CYP27B1, RAN, SQLE, SPHK1, SMPD2, MVD, EIF6, ADGRF5, HMGCR, GFI1, SREBF2, LDLR, MID1IP1, MVK, INS, TNFRSF1A, KPNB1, CYP51A1, ELOVL5, LSS, SNAI2, CDK4, ELOVL6, CCDC3, CTDNEP1	Not Improvers	Unique
GO_DNA_TEMPLATED_TRANSCRIPTION_ELONGATION	8.79798e-05	0.00143275	0.538434	-0.53213	-1.99161	61	POLR1E, SSRP1, ZNRD1, ADRM1, POLR1C, ALYREF, CD3EAP, THOC5, GTF2F1, TAF1D, WDR43, NELFCD, GTF2F2, CCAR2, POLR2L, RNF168, TCERG1, POLR1B, ELOA, SUPT16H, POLR2E, POLR2I, HNRNPU, ERCC2, CCNH, CTR9, NELFB, MLLT1	Not Improvers	Shared
GO_REGULATION_OF_EPITHELIAL_CELL_DIFFERENTIATION	8.82736e-05	0.00143275	0.538434	-0.513953	-1.9498	64	SFRP4, SERPINE1, BMP6, VCL, CYP27B1, ZFP36L1, CAV1, SFN, SPRY2, KLF7, WWTR1, FGF2, CDSN, HEY2, LIF, TNFRSF1A, ZFP36, CDH5, NOTCH4, REG3G, RUNX1, ZEB1, STAT5B, APOLD1	Not Improvers	Shared
GO_REGULATION_OF_SMALL_MOLECULE_METABOLIC_PROCESS	9.02463e-05	0.00145136	0.538434	-0.370833	-1.63958	212	FDPS, HMGCS1, PSMB7, FDFT1, BMP6, DHCR7, PDGFB, PSMC3, CYP27B1, PSMD2, RAN, PSMB1, SQLE, PPARD, PSME2, PSMD13, ENO1, CAV1, MVD, PSMB3, NUP88, EIF6, PSMD6, PSMC5, HMGCR, PSMD3, NUP85, PSMD14, GFI1, DDIT4, PSMD8, SREBF2, LDLR, MID1IP1, MVK, PSMC4, ODC1, PSMA7, PARP1, NUP107, INS, TGFB1, PSMB6, NUP160, PSMD1, PSMB4, PSMD11, VCP, PPP1R3B, PSME3, KPNB1, PSMB2, SEH1L, PSMD4, CYP51A1, ELOVL5, PSMD7, COQ…	Not Improvers	Shared
GO_PROTEIN_LOCALIZATION_TO_NUCLEUS	9.29087e-05	0.00148168	0.538434	-0.423943	-1.7921	136	FERMT1, NOP53, RPL11, BCL3, PHB2, RPL23, RRS1, RAN, FLNA, PKIG, CCT3, KPNA7, NUP88, CCT7, IPO5, CCT6A, NUP85, NF2, WRAP53, CCT5, LMNA, BYSL, PARP1, NUP107, INS, TGFB1, LIF, APOD, KPNB1, NOLC1, NXT1, CCT8, TARDBP, NUTF2, ELAVL1, RPF2, ZPR1, IPO7, CDH1, YWHAE, BARD1, PINX1, KPNA2, NUP62, MCRS1, CTDNEP1	Not Improvers	Shared
GO_REGULATION_OF_EPIDERMIS_DEVELOPMENT	9.38024e-05	0.00148728	0.538434	-0.593236	-2.06692	38	FERMT1, SFRP4, GAL, CYP27B1, PPARD, ZFP36L1, SFN, KLF7, CDSN, HEY2, FST, ZFP36, REG3G, RUNX1	Not Improvers	Unique
GO_REGULATION_OF_MITOTIC_CELL_CYCLE	9.66873e-05	0.00152421	0.538434	-0.349923	-1.59588	312	EIF4EBP1, NOP53, ADAMTS1, NLE1, PSMB7, PHB2, PDGFB, PSMC3, PSMD2, PSMB1, SPHK1, TUBB, RPL26, GADD45GIP1, CTDSP2, APEX1, PRMT1, PSME2, PSMD13, ZFP36L1, PSMB3, SFN, PSMD6, PSMC5, TUBB4B, PRMT5, FGFR1, PSMD3, PSMD14, PSMD8, AURKAIP1, PSMC4, PSMA7, INS, TGFB1, TRIP13, CTDSP1, PSMB6, CDK2, ODF2, TUBG1, HRAS, PSMD1, PSMB4, NABP1, PSMD11, AVEN, SSNA1, PSME3, EIF4G1, DCTN2, PSMB2, PSMD4, NSFL1C, NABP2, T…	Not Improvers	Shared
GO_MORPHOGENESIS_OF_AN_EPITHELIUM	0.000101263	0.00158723	0.538434	-0.365097	-1.6373	240	MSN, MYC, RPS7, SOCS3, PSMB7, PHB2, VCL, KDR, PSMC3, SRF, PSMD2, ACTG1, PSMB1, FLNA, PFN1, EFNB2, ACTB, STARD13, PSME2, PSMD13, ILK, PSMB3, PSMD6, PSMC5, SPRY2, FGFR1, PODXL, FGF2, PSMD3, PSMD14, PSMD8, TBX2, MTHFD1L, VASP, FST, ITGA5, GPC3, PSMC4, PSMA7, CFL1, PGF, TGFB1, LIF, PSMB6, SMURF1, ROR1, PSMD1, PSMB4, PSMD11, FOXF1, PSME3, PSMB2, NOTCH4, WDR1, PSMD4, PSMD7, MPP5, PBX1, BRD2, ABL1, SOX1…	Not Improvers	Shared
GO_NCRNA_EXPORT_FROM_NUCLEUS	0.000102394	0.00159583	0.538434	-0.727705	-2.05674	17	RAN, NPM1, NUP88, NUP85, NUP107, NOL6, NUP160, SEH1L, NUP37, NUP205, NUP62, SEC13, POM121	Not Improvers	Unique
GO_RESPONSE_TO_TUMOR_NECROSIS_FACTOR	0.000106985	0.00165796	0.538434	-0.396233	-1.69363	154	SELE, RACK1, HAMP, PSMB7, RPS3, KRT18, PSMC3, TNFRSF12A, PSMD2, PSMB1, SPHK1, CIB1, IGBP1, THBS1, CCL7, PSME2, PSMD13, ILK, YBX3, ZFP36L1, PSMB3, AKAP12, PSMD6, PSMC5, PSMD3, PSMD14, PSMD8, PLVAP, PSMC4, PSMA7, PSMB6, TNFRSF1A, PSMD1, PSMB4, PSMD11, PSME3, ZFP36, PSMB2, PSMD4, GBP1, ACTN4, PSMD7, CACTIN, RELA, PSMD12, MAP3K14, RFFL, PSME4, SMPD4, CCDC3, HAS2	Not Improvers	Shared
GO_POSITIVE_REGULATION_OF_INNATE_IMMUNE_RESPONSE	0.000109412	0.00168605	0.538434	-0.441552	-1.78082	99	PSMB7, RPS19, PSMC3, PSMD2, PSMB1, PSME2, PSMD13, PSMB3, PSMD6, PSMC5, PSMD3, PSMD14, PSMD8, XRCC6, IRF7, PSMC4, PSMA7, MUC6, RAF1, COCH, PSMB6, RELB, HRAS, PSMD1, PSMB4, PSMD11, PSME3, PSMB2, PSMD4, PQBP1, PSMD7, STAT5B, RELA, POLR3C, PSMD12, HMGB1, CGAS, PSME4, NRAS, PSMF1, NONO, PARP9	Not Improvers	Shared
GO_NUCLEIC_ACID_PHOSPHODIESTER_BOND_HYDROLYSIS	0.000114477	0.0017445	0.538434	-0.394344	-1.68808	155	RPS21, NOB1, RPS27A, NHP2, RRS1, ZNRD1, UBA52, BOP1, POLD2, EXOSC5, APEX1, TDP1, LAS1L, SND1, TRIR, POP4, TATDN1, PARP1, EXOSC2, PNRC2, EXOSC4, EXOSC8, POP1, ZFP36, KPNB1, UTP20, BMS1, XRN2, TBL3, POP7, ISG20L2, NOP9, EXOSC9, RPP40, RFC4, RCL1, KRI1, DDX1, HELZ2, HMGB1, ELAC2, POLR2I, G3BP1, ERI3, RFC1, HSF1, REXO1, ERCC2, SLFN11, DCLRE1B, POP5, CPSF6, DGCR8, CPSF3, ENPP1, TSEN2, UTP23, RPP38, AT…	Not Improvers	Shared
GO_CELLULAR_COMPONENT_DISASSEMBLY	0.000123016	0.00186428	0.518848	-0.345022	-1.561	290	MYC, EIF5A, PRSS2, PHB2, PRSS1, RPL23, CDC37, MRPL11, TGFB3, GADD45GIP1, CIB1, DAP3, MRPL37, ETS1, HMGA1, CAV1, CTRB1, CTRB2, MRPL20, MRPS12, SMARCD1, GRWD1, LPIN1, DDIT4, MAP4K4, SH3GL1, AURKAIP1, FURIN, SREBF2, MRPL10, FUNDC2, MID1IP1, MRPL4, ADAMTS4, NAV3, MRPL3, CFL1, TGFB1, MRPL52, MRPL24, SMURF1, MRPL51, MRPL14, MRPS18C, FLII, MRPL15, MRPS22, VCP, MRPS27, KIF9, KPNB1, DSTN, MRPS2, WDR1, PAR…	Not Improvers	Unique
GO_NEGATIVE_REGULATION_OF_PROTEIN_METABOLIC_PROCESS	0.000127167	0.00191659	0.518848	-0.31223	-1.47419	494	MYC, PPP1R14B, UBASH3B, RGS2, SERPINE1, EIF4EBP1, RACK1, RPS7, NOP53, MYADM, RPL11, BCL3, SOCS3, NLE1, SPINK1, RPL13A, EPHB2, RPL23, GADD45B, RPS3, SMAD7, ISG15, EIF4A3, RPL5, FLNA, PKIG, NPM1, FBLN1, DHCR24, CTDSP2, IL1R2, CIB1, IGBP1, THBS1, CORO1C, IFI6, ILK, ZFP36L1, CAV1, SFN, EIF6, SERPINA4, SPRY2, HMGCR, SERPINB1, WWTR1, EDNRB, DMD, IPO5, DDIT4, FURIN, PPM1F, PWP1, LDLR, DUSP14, NF2, MALSU…	Not Improvers	Unique
GO_PROTEIN_CONTAINING_COMPLEX_DISASSEMBLY	0.000134681	0.00200777	0.518848	-0.392401	-1.70181	169	MYC, EIF5A, RPL23, MRPL11, GADD45GIP1, CIB1, DAP3, MRPL37, HMGA1, CAV1, MRPL20, MRPS12, SMARCD1, GRWD1, DDIT4, SH3GL1, AURKAIP1, MRPL10, MID1IP1, MRPL4, NAV3, MRPL3, CFL1, MRPL52, MRPL24, MRPL51, MRPL14, MRPS18C, FLII, MRPL15, MRPS22, VCP, MRPS27, DSTN, MRPS2, WDR1, MRRF, MRPS34, MRPS23, EIF5AL1, MRPL9, MRPL45, CHMP2A, MRPL54, GSPT1, ADD2, TMOD1, MRPL47, MRPS18A, LMOD1, MRPL22, MRPS28, SUPT16H, A…	Not Improvers	Shared
GO_TERMINATION_OF_RNA_POLYMERASE_I_TRANSCRIPTION	0.000157671	0.00229054	0.518848	-0.675307	-2.0287	21	POLR1E, ZNRD1, CAVIN1, POLR1C, CD3EAP, TAF1D, POLR2L, POLR1B, POLR2E, ERCC2, CCNH, TTF1	Not Improvers	Shared
GO_REGULATION_OF_PROTEIN_MODIFICATION_BY_SMALL_PROTEIN_CONJUGATION_OR_REMOVAL	0.000162817	0.00231803	0.518848	-0.430417	-1.77685	111	RPS2, RPS7, NOP53, RPL11, RPL23, RPS3, SMAD7, ISG15, RPL5, SPHK1, CAV1, AIMP2, FBXO2, DAXX, GTPBP4, VCP, CENPX, MAD2L2, ABL1, STUB1, VPS28, HSPBP1, FKBP1A, UBE2I, RELA, PINX1, MTBP, DYSF, RNF40, MUL1, CTR9, PIAS3, PER2, OTUB1, COPS9, MTA1, PELI1, WASHC1, UBA2, OTUD4, RBX1, BIRC2, SKP2, AMER1, PIN1, PIAS4, NXN, FANCM, PRR7, TRIM44, CDC20, TGFBR1, ADRB2, CAMLG, HMG20B, MALT1, SART3, DCUN1D3, PRICKL…	Not Improvers	Shared
GO_NEGATIVE_REGULATION_OF_CELL_CYCLE	0.000163944	0.00231803	0.518848	-0.34604	-1.56846	289	MYC, NOP53, NLE1, PSMB7, RPL23, PSMC3, PSMD2, PSMB1, RPL26, NPM1, DHCR24, GADD45GIP1, CTDSP2, THBS1, PRMT1, PSME2, PSMD13, ILK, ZFP36L1, PSMB3, SFN, PSMD6, PSMC5, UXT, PSMD3, IPO5, PSMD14, PSMD8, AURKAIP1, PPM1G, PSMC4, RASSF1, THOC5, PSMA7, TGFB1, TRIP13, LIF, CTDSP1, CDC123, PSMB6, CDK2, HRAS, PSMD1, PSMB4, NABP1, PSMD11, AVEN, PSME3, PSMB2, INHA, PSMD4, UIMC1, NABP2, TFAP4, ZW10, XRCC3, TBRG4,…	Not Improvers	Shared
GO_RIBOSE_PHOSPHATE_METABOLIC_PROCESS	0.000182978	0.0025739	0.518848	-0.366396	-1.60119	191	PGM1, HMGCS1, CTPS1, NME1, HK1, PRPS2, IMPDH2, RAN, APRT, UCK2, ATP5F1D, ENO1, MVD, NUP88, EIF6, UPP1, ADK, HMGCR, HSD17B8, NUP85, DDIT4, ATP5MC1, GART, ACOT9, MVK, ELOVL1, PAICS, PARP1, NUP107, INS, TGFB1, LDHA, NPPB, PFAS, NUP160, VCP, ATP5MC2, SEH1L, GNAI3, TKT, GAPDH, CYC1, ELOVL5, UMPS, NUDT11, GALK1, GUK1, NUP37, NUP205, PPAT, ATIC, RPIA, ELOVL6, NUP62, BPNT1, GTPBP1, GCKR, ATP5PD, PGM2L1, …	Not Improvers	Unique
GO_TRNA_TRANSPORT	0.000207913	0.00289495	0.518848	-0.727769	-2.02498	16	RAN, NUP88, NUP85, NUP107, YBX1, NOL6, NUP160, SEH1L, NUP37, NUP205, NUP62, SEC13, POM121	Not Improvers	Shared
GO_NUCLEUS_ORGANIZATION	0.000216064	0.00299325	0.518848	-0.499298	-1.8942	64	RPS19, PES1, ETS1, LPIN1, ANKLE2, WRAP53, LMNA, NUP107, SERBP1, EMG1, SEH1L, NOLC1, NSFL1C, CHMP4B, TARDBP, CHMP2A, ZPR1, PITPNB, NUP205, POLR1B, PSME4, HABP4, CTDNEP1, CHMP6, USP36, WDR73, MFSD14A	Not Improvers	Unique
GO_ANTIGEN_PROCESSING_AND_PRESENTATION_OF_PEPTIDE_ANTIGEN_VIA_MHC_CLASS_I	0.000254376	0.00348877	0.498493	-0.513794	-1.92299	61	PSMB7, PSMC3, PSMD2, PSMB1, PSME2, PSMD13, PSMB3, PSMD6, PSMC5, PSMD3, PSMD14, PSMD8, PSMC4, PSMA7, PSMB6, PSMD1, PSMB4, PSMD11, PSME3, PSMB2, PSMD4, PSMD7, TAP2	Not Improvers	Shared
GO_NEGATIVE_REGULATION_OF_PROTEIN_MODIFICATION_BY_SMALL_PROTEIN_CONJUGATION_OR_REMOVAL	0.00025676	0.00350394	0.498493	-0.556471	-1.95099	40	RPS7, RPL11, RPL23, RPS3, SMAD7, ISG15, RPL5, CAV1, GTPBP4, MAD2L2, ABL1, VPS28, RELA, PINX1, DYSF, PIAS3, PER2, OTUB1, COPS9	Not Improvers	Shared
GO_DNA_DEPENDENT_DNA_REPLICATION	0.000258447	0.0035095	0.498493	-0.475422	-1.8386	73	MCM6, MCM7, MCM5, MCM4, MCM3, POLD2, HMGA1, FGFR1, CDC34, ALYREF, CDK2, TWNK, DSCC1, GINS4, POLE3, CENPX, MCM2, ZPR1, RFC4, WDR18, LIG3, RFC1, SLFN11, POLE4, MCM9, RTF2, POLA2, POLA1, GINS3, ORC1, ATAD5, GEN1, POLE, GINS2	Not Improvers	Shared
GO_BLOOD_VESSEL_MORPHOGENESIS	0.000306585	0.00411324	0.498493	-0.337672	-1.52654	277	JUNB, SERPINE1, ADAMTS1, EPHB1, EPHB2, KDR, F3, TEK, SMAD7, SRF, TNFRSF12A, JCAD, ACTG1, SPHK1, EFNB2, STARD13, CIB1, THBS1, ZFP36L1, ETS1, CAV1, ANPEP, ADGRF5, SPRY2, GATA2, FGFR1, EPHB3, FGF2, TIE1, LOX, TBX2, LDLR, APLNR, ROBO4, ANGPTL2, CALCRL, HEY2, ITGA5, SHC1, NRP2, ELK3, PGF, TGFB1, APOD, FGFBP1, NPPB, ANXA2, CXCL17, FOXF1, CDH5, HSPB1, NOTCH4, PTPRB, HGS, EPN1, MMP19, RUNX1, FLT4, RNH1, …	Not Improvers	Shared
GO_INNATE_IMMUNE_RESPONSE_ACTIVATING_SIGNAL_TRANSDUCTION	0.000307406	0.00411324	0.498493	-0.490665	-1.86145	64	PSMB7, PSMC3, PSMD2, PSMB1, PSME2, PSMD13, PSMB3, PSMD6, PSMC5, PSMD3, PSMD14, PSMD8, PSMC4, PSMA7, MUC6, RAF1, PSMB6, RELB, HRAS, PSMD1, PSMB4, PSMD11, PSME3, PSMB2, PSMD4, PSMD7, RELA, PSMD12, PSME4, NRAS, PSMF1	Not Improvers	Unique
GO_VASCULATURE_DEVELOPMENT	0.000321037	0.00427478	0.498493	-0.325602	-1.49787	336	JUNB, SERPINE1, SOCS3, ADAMTS1, EPHB1, NSDHL, EPHB2, FOXS1, DHCR7, PDGFB, KDR, F3, TEK, SMAD7, SRF, TNFRSF12A, JCAD, ACTG1, SPHK1, EFNB2, STARD13, CIB1, THBS1, ANP32B, ZFP36L1, ETS1, CAV1, ANPEP, ADGRF5, SPRY2, GATA2, FGFR1, EPHB3, FGF2, TIE1, PTPN14, LOX, TBX2, LDLR, APLNR, ROBO4, ANGPTL2, CALCRL, HEY2, ITGA5, GPC3, SHC1, NRP2, FOSL1, ELK3, PGF, TGFB1, LIF, APOD, FGFBP1, NPPB, ANXA2, CXCL17, FOX…	Not Improvers	Shared
GO_AMINE_METABOLIC_PROCESS	0.000324467	0.00429287	0.498493	-0.476343	-1.82737	70	SMOX, PSMB7, SLC22A3, PSMC3, SRM, PSMD2, PSMB1, PSME2, PSMD13, PSMB3, PSMD6, PSMC5, PSMD3, PSMD14, PSMD8, PSMC4, GDE1, ODC1, PSMA7, INS, PSMB6, PSMD1, PSMB4, PSMD11, PSME3, PSMB2, PSMD4, PSMD7, OAZ1, PSMD12, PSME4, VCAM1, PSMF1, ABCC2	Not Improvers	Shared
GO_RNA_MODIFICATION	0.000368301	0.00478791	0.498493	-0.446996	-1.77003	87	WDR4, NHP2, FBL, URM1, THG1L, METTL1, RPUSD4, HSD17B10, TPRKB, FTSJ3, PUS1, FTSJ1, PUS3, PUS7, NSUN5, EMG1, DUS3L, NAT10, CTU2, BUD23, PCIF1, RPUSD2, QTRT1, TFB2M, TGS1, APOBEC2, TYW3, LCMT2, BCDIN3D, ADAT3, DUS2, TRMT13, MOCS3, NAF1, CTU1, ADAT2, TRMU, TRMT10B	Not Improvers	Shared
GO_REGULATION_OF_EPIDERMAL_CELL_DIFFERENTIATION	0.000387655	0.00500927	0.498493	-0.610395	-1.95919	28	SFRP4, CYP27B1, ZFP36L1, SFN, KLF7, CDSN, HEY2, ZFP36, REG3G, RUNX1	Not Improvers	Unique
GO_POSITIVE_REGULATION_OF_BLOOD_VESSEL_ENDOTHELIAL_CELL_MIGRATION	0.000393882	0.00504868	0.498493	-0.591554	-1.92653	29	PDGFB, KDR, JCAD, CIB1, THBS1, ETS1, GATA2, FGFR1, FGF2, TGFB1, FGFBP1, HSPB1, ABL1, MAP3K3, HMGB1, MAP2K3	Not Improvers	Shared
GO_REGULATION_OF_POSTTRANSCRIPTIONAL_GENE_SILENCING	0.000415011	0.00529477	0.498493	-0.546434	-1.9158	40	NUP88, NUP85, NUP107, TGFB1, NUP160, EIF4G1, ZFP36, SEH1L, ELAVL1, POLR2L, NUP37, NUP205, NUP62, POLR2E, ZC3H10, POLR2I, XPO5, NEAT1, SEC13, BCDIN3D, MAP2K1, POM121, IPO8, RAE1, POLR2D, ESR1, AGO2, POLR2G, IL6	Not Improvers	Shared
GO_DNA_GEOMETRIC_CHANGE	0.000423569	0.00535415	0.498493	-0.493234	-1.83819	60	MCM6, MCM7, MCM5, RPS27A, MCM4, MCM3, UBA52, RUVBL1, HMGA1, XRCC6, PARP1, TWNK, DSCC1, GINS4, GTF2F2, MCM2, RFC4, DDX1, HNRNPA2B1, HMGB1, CETN2, G3BP1, ERCC2, MCM9	Not Improvers	Shared
GO_NEGATIVE_REGULATION_OF_CELLULAR_AMIDE_METABOLIC_PROCESS	0.000428713	0.00535441	0.498493	-0.452654	-1.75505	75	RGS2, EIF4EBP1, RACK1, RPL13A, RPS3, EIF4A3, SPHK1, ZFP36L1, EIF6, MALSU1, HNRNPR, YBX1, PUS7, EIF2S1, EIF3E, EIF4G1, ZFP36, PLEKHN1, NOTCH4, ATF4, GAPDH, DAPK3, HNRNPD, TARDBP, PCIF1, CIRBP, SYNCRIP, BTG2, SHMT2, PAIP2, EIF4E	Not Improvers	Unique
GO_RIBONUCLEOSIDE_MONOPHOSPHATE_BIOSYNTHETIC_PROCESS	0.000429092	0.00535441	0.498493	-0.697146	-1.97037	17	PRPS2, IMPDH2, APRT, UCK2, UPP1, ADK, GART, PAICS, PFAS, UMPS, PPAT, ATIC	Not Improvers	Unique
GO_NUCLEOSOME_ORGANIZATION	0.000429446	0.00535441	0.498493	-0.507572	-1.87344	55	NPM1, PTMA, ANP32B, RUVBL1, HMGA1, SMARCD1, GRWD1, DAXX, NASP, HAT1, POLE3, CENPX, MCM2, BRD2, CENPH, SUPT16H, PSME4, SRCAP, MIS18A, SMARCC1, SET, SMARCB1, VPS72	Not Improvers	Unique
GO_NEGATIVE_REGULATION_OF_CHROMOSOME_ORGANIZATION	0.00045253	0.0055914	0.498493	-0.49217	-1.83423	60	HNRNPA1, HMGA1, TINF2, PARP1, TRIP13, NOC2L, NAT10, ZW10, XRCC3, MAD2L2, MCM2, HNRNPC, DNMT3B, PINX1, WDR5, HNRNPU, DNMT1, NAA10, SET, ACD, OTUB1, SMARCB1, ZNF207, IK, BUB3, BCOR, GEN1	Not Improvers	Unique
GO_REGULATION_OF_CELLULAR_KETONE_METABOLIC_PROCESS	0.000456827	0.00561917	0.498493	-0.445414	-1.75563	85	PSMB7, BMP6, PSMC3, PSMD2, PSMB1, PPARD, PSME2, PSMD13, CAV1, PSMB3, EIF6, PSMD6, PSMC5, PSMD3, PSMD14, PSMD8, MID1IP1, PSMC4, ODC1, PSMA7, INS, PSMB6, PSMD1, PSMB4, PSMD11, PSME3, PSMB2, PSMD4, ELOVL5, PSMD7, COQ3	Not Improvers	Shared
GO_RNA_STABILIZATION	0.000471746	0.00577249	0.498493	-0.657211	-1.93772	20	PABPC1, YBX3, YBX1, ZFP36, HNRNPD, TARDBP, ELAVL1, MAPKAPK2, HNRNPC, CIRBP, SYNCRIP, HNRNPU, VIP	Not Improvers	Unique
GO_REGULATION_OF_ALCOHOL_BIOSYNTHETIC_PROCESS	0.0004735	0.00577249	0.498493	-0.543934	-1.91846	41	FDPS, HMGCS1, FDFT1, BMP6, DHCR7, CYP27B1, RAN, SQLE, MVD, HMGCR, GFI1, SREBF2, MVK, KPNB1, CYP51A1, LSS, ELOVL6	Not Improvers	Unique
GO_REGULATION_OF_CATABOLIC_PROCESS	0.000484524	0.00587267	0.498493	-0.300155	-1.41835	497	MSN, RACK1, RPS7, NOP53, RPL11, VIM, RPS27A, PSMB7, PHB2, RPL23, EEF1A1, CDC37, KDR, SMAD7, PSMC3, PABPC1, PSMD2, RPL5, HNRNPM, PSMB1, FLNA, UBA52, NPM1, EXOSC5, APEX1, PSME2, PSMD13, YBX3, ZFP36L1, PABPC4, CAV1, PSMB3, NUP88, EIF6, PSMD6, PSMC5, HMGCR, PSMD3, NUP85, PSMD14, DDIT4, PSMD8, FURIN, SREBF2, LDLR, DHX34, GPC3, PSMC4, ODC1, HNRNPR, PSMA7, NUP107, INS, EXOSC2, SERBP1, C4BPB, SGTA, PSMB6…	Not Improvers	Unique
GO_NEGATIVE_REGULATION_OF_MRNA_PROCESSING	0.000485999	0.00587267	0.498493	-0.659791	-1.93106	19	C1QBP, SRSF7, RBM42, PTBP1, RBMX, RNPS1, BARD1, HNRNPA2B1, HNRNPK, SFSWAP, RNF40, CTR9	Not Improvers	Unique
GO_TRANSCRIPTION_INITIATION_FROM_RNA_POLYMERASE_I_PROMOTER	0.000503842	0.00606157	0.477271	-0.649413	-1.96025	22	POLR1E, ZNRD1, CAVIN1, POLR1C, CD3EAP, TAF1D, POLR2L, POLR1B, POLR2E, ERCC2, CCNH, SMARCB1	Not Improvers	Shared
GO_METHYLATION	0.000535724	0.00630683	0.477271	-0.38963	-1.6681	156	MYC, AHCY, WDR4, FBL, METTL1, SNRPB, PRMT1, HSD17B10, KPNA7, PRMT5, FTSJ3, GFI1, EEF2KMT, PWP1, LMNA, FTSJ1, PARP1, NSUN5, EMG1, MBD2, BUD23, SMYD5, COQ3, RAB3D, GSPT1, MECOM, PCIF1, DNMT3B, KMT5A, DOT1L, TFB2M, EEF1AKMT4, TGS1, WDR5, CARM1, BTG2, MBD3, TDRD1, FAM86C2P, TYW3, DNMT1, MIS18A, CTR9, DPH5, METTL22, ZNF335, LCMT2, SMARCB1, SETD6, BCDIN3D, SETD3, MTAP, BCOR, TRMT13, CXXC1, RRP8, FAM98A…	Not Improvers	Unique
GO_STEROL_BIOSYNTHETIC_PROCESS	0.000555842	0.0065157	0.477271	-0.540036	-1.92158	42	ACAT2, FDPS, HMGCS1, FDFT1, NSDHL, DHCR7, RAN, SQLE, DHCR24, MVD, HSD17B7, MSMO1, HMGCR, SREBF2, MVK, KPNB1, CYP51A1, LBR, LSS	Not Improvers	Unique
GO_POSITIVE_REGULATION_OF_EPIDERMIS_DEVELOPMENT	0.000581903	0.00679217	0.477271	-0.705316	-1.96251	16	SFRP4, GAL, CYP27B1, PPARD, SFN, FST	Not Improvers	Unique
GO_PROTEIN_MODIFICATION_BY_SMALL_PROTEIN_REMOVAL	0.000605918	0.0070128	0.477271	-0.372768	-1.61003	167	MYC, NOP53, RPS27A, PSMB7, SMAD7, PSMC3, PSMD2, PSMB1, UBA52, USP43, ACTB, PSME2, PSMD13, RUVBL1, ADRM1, PSMB3, PSMD6, PSMC5, ACTL6A, PSMD3, INO80C, PSMD14, PSMD8, PSMC4, PSMA7, PSMB6, PSMD1, PSMB4, PSMD11, VCP, PSME3, EIF3F, PSMB2, PSMD4, UIMC1, HGS, UFD1, PSMD7, RAD23A, USP10, BARD1, COPS6, PSMD12, PSME4, MCRS1, SHMT2, USP36, PSMF1, USP7, USP53, OTUB1, ASXL1, RHOA, OTUD6B, NFRKB, USP15, USP16, …	Not Improvers	Shared
GO_DNA_REPLICATION_INITIATION	0.000619224	0.00709648	0.477271	-0.644578	-1.94565	22	MCM6, MCM7, MCM5, MCM4, MCM3, CDC34, CDK2, POLE3, MCM2, WDR18, POLE4, POLA2, POLA1, ORC1, POLE	Not Improvers	Shared
GO_CELL_CYCLE_DNA_REPLICATION	0.000620332	0.00709648	0.477271	-0.586071	-1.93278	31	MCM6, MCM7, MCM5, MCM4, MCM3, POLD2, FGFR1, POLE3, MCM2, ZPR1, RFC4, RFC1, POLE4, RTF2, POLA2, POLA1	Not Improvers	Shared
GO_MITOTIC_SISTER_CHROMATID_SEGREGATION	0.00064441	0.0073042	0.477271	-0.451834	-1.76228	77	KIF22, RRS1, RAN, TRIP13, TUBG1, DSCC1, DCTN2, KPNB1, SEH1L, ZW10, CHMP4B, XRCC3, CHMP2A, MAD2L2, PINX1, ANAPC5, NUP62, CHMP6, HNRNPU, NAA10, SMC1A, ZNF207, ZWINT, SLF1, IK, KNSTRN, BUB3, DIS3L2, GEN1, MSTO1	Not Improvers	Unique
GO_CELLULAR_AMINO_ACID_METABOLIC_PROCESS	0.000649355	0.00732996	0.477271	-0.381823	-1.62169	144	AHCY, PSMB7, CTPS1, PM20D1, PSMC3, PSMD2, PSMB1, PPA1, AGXT, PYCR3, PSME2, PSMD13, HSD17B10, PSMB3, PSMD6, PSMC5, AIMP2, PSMD3, PSMD14, PSMD8, PYCR1, GART, PSMC4, ODC1, PSMA7, INS, FARSB, PSMB6, PFAS, PSMD1, PSMB4, PSMD11, SLC25A21, PSME3, PSMB2, ATF4, PSMD4, FARSA, PSMD7, PPAT, OAZ1, PSMD12, PLOD2, PSME4, SEPHS1, SHMT2	Not Improvers	Unique
GO_REGULATION_OF_WNT_SIGNALING_PATHWAY	0.000675218	0.00755968	0.477271	-0.360003	-1.57144	184	FERMT1, MDFI, SFRP4, RACK1, NLE1, PSMB7, PSMC3, PSMD2, PSMB1, PSME2, PSMD13, RUVBL1, ILK, CAV1, PSMB3, PSMD6, PSMC5, WWTR1, PSMD3, PSMD14, PSMD8, ITGA3, GPC3, PSMC4, PSMA7, TGFB1, PSMB6, PSMD1, PSMB4, SHISA2, PSMD11, VCP, PSME3, PSMB2, PSMD4, DAPK3, MBD2, RUNX1, CCAR2, PSMD7, MAD2L2, TLE3, ABL1, SNAI2, LGR4, GPRC5B, TMEM131L, C12orf43, PSMD12, PSME4, CTDNEP1, G3BP1, PSMF1, CSNK1D, TMEM88, CSNK2A1	Not Improvers	Unique
GO_POSITIVE_REGULATION_OF_RESPONSE_TO_EXTERNAL_STIMULUS	0.000740915	0.00809982	0.477271	-0.34898	-1.55407	222	SERPINE1, PSMB7, RPS19, BMP6, PDGFB, KDR, ANO6, F3, PSMC3, CYP27B1, PSMD2, IL1RL1, PSMB1, C1QBP, THBS1, ITGA2, CCL7, PSME2, PSMD13, ETS1, PSMB3, CCR7, PSMD6, PSMC5, FGFR1, FGF2, PSMD3, PSMD14, PSMD8, PPM1F, LDLR, XRCC6, IRF7, TSLP, PSMC4, PSMA7, PGF, MUC6, TGFB1, RAF1, COCH, PSMB6, RELB, TNFRSF1A, HRAS, PSMD1, PSMB4, PSMD11, CXCL17, PSME3, PSMB2, HSPB1, PSMD4, PQBP1, PSMD7, PGC, OSMR, THBS4, APOH…	Not Improvers	Shared
GO_SISTER_CHROMATID_SEGREGATION	0.000741337	0.00809982	0.477271	-0.433907	-1.71027	85	PHB2, KIF22, RRS1, RAN, TRIP13, TUBG1, DSCC1, DCTN2, KPNB1, SEH1L, ZW10, CHMP4B, XRCC3, CHMP2A, MAD2L2, PINX1, ANAPC5, NUP62, CHMP6, HNRNPU, NAA10, SMC1A, ZNF207, ZWINT, SLF1, IK, KNSTRN, BUB3, DIS3L2, GEN1, MSTO1, STAG3L3, ANAPC11	Not Improvers	Unique
GO_TRANSLESION_SYNTHESIS	0.000742298	0.00809982	0.477271	-0.639303	-1.92973	22	RPS27A, ISG15, UBA52, USP43, POLD2, VCP, UFD1, MAD2L2, RFC4, USP10, RFC1	Not Improvers	Shared
GO_NCRNA_3_END_PROCESSING	0.000744965	0.00809982	0.477271	-0.667049	-1.9231	18	RPS21, FBL, EXOSC5, HSD17B10, EXOSC2, EXOSC4, EXOSC8, EXOSC9, ELAC2, ERI3, INTS12	Not Improvers	Shared
GO_CHROMOSOME_LOCALIZATION	0.000747085	0.00809982	0.477271	-0.552214	-1.92399	38	KIF22, RRS1, ACTR3, DCTN2, KPNB1, SEH1L, ZW10, CHMP4B, CHMP2A, PINX1, NUP62, CHMP6, HNRNPU	Not Improvers	Unique
GO_CELL_MIGRATION_INVOLVED_IN_SPROUTING_ANGIOGENESIS	0.000761497	0.00822356	0.477271	-0.57338	-1.86734	29	KDR, SRF, JCAD, EFNB2, STARD13, CIB1, THBS1, GATA2, FGF2, FGFBP1, ABL1, CLEC14A, MAP3K3, MMRN2	Not Improvers	Shared
GO_BLOOD_VESSEL_ENDOTHELIAL_CELL_MIGRATION	0.000800046	0.00860598	0.477271	-0.48628	-1.81294	59	PDGFB, KDR, SRF, JCAD, EFNB2, STARD13, CIB1, THBS1, ETS1, GATA2, FGFR1, FGF2, TGFB1, FGFBP1, CDH5, HSPB1, ABL1, SOX18, CLEC14A, MAP3K3, ANGPT2, HMGB1, MMRN2, MAP2K3	Not Improvers	Shared
GO_IN_UTERO_EMBRYONIC_DEVELOPMENT	0.000888232	0.00940702	0.477271	-0.352914	-1.53504	180	MDFI, JUNB, SOCS3, NLE1, ADAMTS3, NSDHL, PDGFB, PSMC3, BTF3, SRF, TGFB3, CCNB1IP1, PRMT1, YBX3, ZFP36L1, KPNA7, ACTL6A, GATA2, ARHGDIG, FGFR1, TIE1, TM4SF1, FURIN, HEY2, PSMC4, BYSL, FOSL1, LIF, WDR74, YBX1, KRT19, EMG1, FOXF1, GINS4, NASP, RIC8A, EPN1, MGAT1, ZPR1, SOX18, EPAS1, PHLDA2	Not Improvers	Shared
GO_ALTERNATIVE_MRNA_SPLICING_VIA_SPLICEOSOME	0.000908089	0.00954129	0.477271	-0.529475	-1.86746	41	HNRNPA1, HNRNPM, SRSF7, SRSF2, PUF60, PTBP1, RBMX, KHDRBS1, RBM19, PQBP1, SRSF3, RNPS1, SFSWAP, ZC3H10, RBM17, HNRNPU, MBNL2, SCNM1, IK, SRSF9, KHDRBS3, SAP18, SRSF1	Not Improvers	Unique
GO_IMMUNE_SYSTEM_DEVELOPMENT	0.000911345	0.00954129	0.477271	-0.302554	-1.4182	442	MT1G, MYC, JUNB, UBASH3B, PNP, BCL3, RPS14, PSMB7, RPS19, NME1, EEF2, KDR, TEK, SMAD7, PSMC3, ISG15, SRF, PSMD2, RRS1, PRELID1, PSMB1, CIB1, THBS1, CEBPD, PRMT1, PSME2, PSMD13, SART1, ZFP36L1, ETS1, PABPC4, ALAS2, PSMB3, CCR7, EIF6, PSMD6, PSMC5, TYRO3, ADGRF5, AXL, PDCD2, GATA2, IL11, LFNG, EPHB3, PSMD3, PSMD14, GFI1, LOX, PSMD8, RIPK3, XRCC6, IRF7, FST, GPC3, PSMC4, THOC5, JAGN1, PSMA7, PARP1, …	Not Improvers	Unique
GO_REGULATION_OF_TRANSLATIONAL_INITIATION	0.000945681	0.00979234	0.477271	-0.514981	-1.83903	43	EIF4EBP1, RPL13A, NPM1, EIF3B, EIF3H, CDC123, EIF4H, EIF3K, EIF2S1, EIF3E, EIF4G1, KHDRBS1, HSPB1, EIF4B, ATF4, EIF5B, DDX1, RPS6KB2, HABP4, PAIP2, EIF4G2	Not Improvers	Unique
GO_HISTONE_EXCHANGE	0.000946034	0.00979234	0.477271	-0.64126	-1.87683	19	NPM1, PTMA, RUVBL1, NASP, CENPX, CENPH, PSME4, SRCAP, MIS18A, VPS72	Not Improvers	Unique
GO_POSITIVE_REGULATION_OF_GENE_EXPRESSION_EPIGENETIC	0.00100002	0.0101667	0.45506	-0.563531	-1.88498	32	POLR1E, ZNRD1, ACTB, HMGA1, POLR1C, SMARCD1, CD3EAP, WBP2, TAF1D, DDX21, CDCA4, POLR2L, MYBBP1A, POLR1B, POLR2E	Not Improvers	Unique
GO_REGULATION_OF_INNATE_IMMUNE_RESPONSE	0.00100074	0.0101667	0.45506	-0.398465	-1.68217	135	SOCS3, PSMB7, RPS19, CDC37, PSMC3, MICA, PSMD2, PSMB1, PSME2, PSMD13, PSMB3, PSMD6, PSMC5, TYRO3, PSMD3, PSMD14, PSMD8, XRCC6, IRF7, PSMC4, NLRC3, PSMA7, INS, MUC6, RAF1, COCH, PSMB6, RELB, HRAS, PSMD1, PSMB4, PSMD11, PSME3, PSMB2, PSMD4, PQBP1, PSMD7, LRP8, CACTIN, STAT5B, RELA, POLR3C, PSMD12, HMGB1, CGAS, ABCE1, PSME4, NRAS, PSMF1, MUL1, NONO, PARP9, NR1H2	Not Improvers	Unique
GO_REGULATION_OF_CELL_CYCLE_PROCESS	0.00101307	0.0102541	0.45506	-0.30891	-1.42875	352	NOP53, ADAMTS1, PSMB7, PHB2, RPL23, PDGFB, PSMC3, PSMD2, PSMB1, SPHK1, TUBB, RPL26, NPM1, CTDSP2, APEX1, PRMT1, PSME2, PSMD13, ZFP36L1, PSMB3, SFN, PSMD6, PSMC5, TUBB4B, PRMT5, SND1, FGFR1, UXT, PSMD3, PSMD14, PSMD8, AURKAIP1, PSMC4, PSMA7, INS, TRIP13, LIF, CTDSP1, PSMB6, CDK2, ODF2, TUBG1, PSMD1, PSMB4, PSMD11, AVEN, SSNA1, PSME3, EIF4G1, DCTN2, PSMB2, PSMD4, UIMC1, NSFL1C, TFAP4, ZW10, DAPK3, …	Not Improvers	Shared
GO_NUCLEOSIDE_MONOPHOSPHATE_BIOSYNTHETIC_PROCESS	0.00101952	0.0102815	0.45506	-0.618109	-1.89397	23	PRPS2, IMPDH2, APRT, UCK2, UPP1, ADK, GART, PAICS, PFAS, DGUOK, UMPS, PPAT, ATIC	Not Improvers	Unique
GO_METAPHASE_PLATE_CONGRESSION	0.00102432	0.010292	0.45506	-0.557743	-1.88525	34	KIF22, RRS1, DCTN2, KPNB1, SEH1L, ZW10, CHMP4B, CHMP2A, PINX1, NUP62, CHMP6, HNRNPU	Not Improvers	Unique
GO_REGULATION_OF_UBIQUITIN_PROTEIN_TRANSFERASE_ACTIVITY	0.00105904	0.0105252	0.45506	-0.629544	-1.90027	22	RPS2, RPS7, RPL11, RPL23, SMAD7, RPL5, MAD2L2, ABL1, STUB1	Not Improvers	Unique
GO_REGULATION_OF_PROTEIN_CATABOLIC_PROCESS	0.00109698	0.0108628	0.45506	-0.346643	-1.51912	197	MSN, RACK1, RPS7, NOP53, RPL11, RPL23, EEF1A1, SMAD7, PSMD2, RPL5, FLNA, PSME2, CAV1, HMGCR, PSMD3, PSMD14, FURIN, LDLR, GPC3, PSMC4, ODC1, INS, C4BPB, SGTA, SMURF1, PSMD1, ANXA2, VCP, PSME3, DERL3, PACSIN3, HGS, CYP51A1, CCAR2, MAD2L2, SF3B3, STUB1, VPS28, SNX9, CDH1, HSPBP1, RAD23A, RELA, BARD1, OAZ1, FAF1, AQP11, LAMP3, GIPC1, DYSF, CSNK2A2, CHMP6, RNF40, PSMF1, CSNK1D, USP7, PTK2, CSNK2A1, SM…	Not Improvers	Unique
GO_REGULATION_OF_CHROMOSOME_ORGANIZATION	0.00112866	0.011132	0.45506	-0.37614	-1.60798	151	MYC, HNRNPA1, SSRP1, CCT3, HMGA1, KPNA7, GATA2, CCT7, CCT6A, GFI1, CCT5, TINF2, LMNA, WBP2, PARP1, TRIP13, LIF, NOC2L, NAT10, NABP2, ZW10, HNRNPD, CCT8, XRCC3, MAD2L2, MCM2, SNAI2, HNRNPC, DNMT3B, PINX1, HNRNPA2B1, ANAPC5, WDR5, RNF40, CENPV, HNRNPU, USP7, DNMT1, CTR9, NAA10, SET, ACD, ZNF335, OTUB1, SMARCB1, ZNF207, MAPK1, SLF1, IK, BUB3, BCOR, SIRT6, GEN1, MAP1S	Not Improvers	Shared
GO_POSITIVE_REGULATION_OF_BINDING	0.00115454	0.0112701	0.45506	-0.435881	-1.69471	76	S100A10, RPL11, EIF3D, EDF1, NME1, RAN, ITGA2, CAV1, LFNG, EIF3C, PARP1, TGFB1, ANXA2, EIF2S1, EIF3E, EIF4G1, MBD2, EBF2, ABL1, ADD2, RAPGEF2, FKBP1A, PINX1, HMGB1, HSF1, ERCC2, PARP9, ACD	Not Improvers	Unique
GO_NEGATIVE_REGULATION_OF_RNA_CATABOLIC_PROCESS	0.00118957	0.01153	0.45506	-0.579388	-1.84369	27	PABPC1, YBX3, DHX34, YBX1, ZFP36, HNRNPD, TARDBP, PKP3, ELAVL1, MAPKAPK2, HNRNPC, CIRBP, SYNCRIP, HNRNPU, VIP	Not Improvers	Unique
GO_REGULATION_OF_BINDING	0.00122955	0.0118339	0.45506	-0.375919	-1.61576	158	MDFI, S100A10, UBASH3B, RACK1, RPL11, EIF3D, BCL3, EDF1, NME1, PDGFB, EIF4A3, RAN, ACTB, ITGA2, CAV1, LFNG, LOX, HEY2, ZNF593, EIF3C, PARP1, TGFB1, LIF, GTF2F1, GTPBP4, ANXA2, EIF2S1, EIF3E, EIF4G1, TFAP4, MBD2, MAD2L2, EBF2, ABL1, ADD2, STUB1, PHLDA2, IFIT1, RAPGEF2, FKBP1A, DOT1L, PINX1, HMGB1, CARM1, HABP4, TGFBR3, CDC42, HSF1, ERCC2	Not Improvers	Shared
GO_REGULATION_OF_CELLULAR_RESPONSE_TO_GROWTH_FACTOR_STIMULUS	0.00123874	0.0118807	0.45506	-0.39736	-1.65487	121	FERMT1, SFRP4, ADAMTS3, RPS27A, SMAD7, JCAD, UBA52, TGFB3, THBS1, ILK, CAV1, SPRY2, FGFR1, CHRDL1, FGF2, LOX, FST, ITGA3, ITGA5, GPC3, TGFB1, SMURF1, FGFBP1, MIR17HG, SHISA2, CDH5, HGS, GPC1, ABL1, STUB1, ZEB1, HHIP, FSTL3, MMRN2, GIPC1, TGFBR3, ITGB3, STRAP, GRB10, FBN1	Not Improvers	Unique
GO_CHROMOSOME_SEGREGATION	0.00126932	0.0120893	0.45506	-0.382778	-1.60005	131	PHB2, KIF22, RPS3, RRS1, RAN, CCNB1IP1, ACTR3, TRIP13, TUBG1, DSCC1, DCTN2, KPNB1, SEH1L, ZW10, CHMP4B, XRCC3, CENPX, CHMP2A, MAD2L2, NUP37, UBE2I, PINX1, ANAPC5, CENPH, NUP62, CSNK2A2, CHMP6, CDC42, HNRNPU, ERCC2, MIS18A, CSNK2A1, NAA10, SMC1A, ZNF207, ZWINT, SLF1, IK, MMS19, KNSTRN, BUB3, PMF1, DIS3L2, GEN1, MSTO1	Not Improvers	Unique
GO_RNA_PHOSPHODIESTER_BOND_HYDROLYSIS_ENDONUCLEOLYTIC	0.00127739	0.0121242	0.45506	-0.489817	-1.77092	47	RPS21, NOB1, RRS1, BOP1, APEX1, SND1, POP4, POP1, UTP20, BMS1, TBL3, POP7, NOP9, RPP40, RCL1, KRI1, ELAC2, SLFN11, POP5, DGCR8, CPSF3, TSEN2, UTP23, RPP38	Not Improvers	Shared
GO_REGULATION_OF_CHOLESTEROL_METABOLIC_PROCESS	0.00128789	0.0121816	0.45506	-0.559401	-1.87952	33	FDPS, HMGCS1, FDFT1, DHCR7, RAN, SQLE, MVD, HMGCR, SREBF2, LDLR, MVK, KPNB1, CYP51A1, LSS, ELOVL6	Not Improvers	Unique
GO_REGULATION_OF_STEROID_BIOSYNTHETIC_PROCESS	0.00137018	0.0128273	0.45506	-0.515584	-1.84179	44	FDPS, HMGCS1, FDFT1, BMP6, DHCR7, CYP27B1, RAN, SQLE, MVD, HMGCR, GFI1, SREBF2, MVK, KPNB1, CYP51A1, LSS, SNAI2, ELOVL6	Not Improvers	Unique
GO_TELOMERE_MAINTENANCE_VIA_TELOMERE_LENGTHENING	0.00141886	0.0132379	0.45506	-0.55317	-1.88301	35	HNRNPA1, NHP2, CCT3, CCT7, CCT6A, WRAP53, CCT5, TINF2, PARP1, NAT10, CCT8, HNRNPC, PINX1, HNRNPA2B1, RFC1, HNRNPU, DCLRE1B, ACD, MAPK1	Not Improvers	Shared
GO_TUBE_MORPHOGENESIS	0.00144063	0.0133954	0.45506	-0.302198	-1.40292	381	MYC, JUNB, SERPINE1, RPS7, ADAMTS1, EPHB1, PHB2, EPHB2, KDR, F3, TEK, SMAD7, SRF, TNFRSF12A, JCAD, ACTG1, SPHK1, PFN1, EFNB2, STARD13, CIB1, THBS1, ILK, ZFP36L1, ETS1, CAV1, ANPEP, ADGRF5, SPRY2, GATA2, FGFR1, PODXL, EPHB3, FGF2, TIE1, LOX, TBX2, MTHFD1L, LDLR, APLNR, ROBO4, ANGPTL2, VASP, CALCRL, HEY2, ITGA5, GPC3, SHC1, NRP2, ELK3, CFL1, PGF, TGFB1, APOD, FGFBP1, NPPB, ANXA2, CXCL17, FOXF1, CDH…	Not Improvers	Shared
GO_RNA_PHOSPHODIESTER_BOND_HYDROLYSIS	0.00147468	0.0136176	0.45506	-0.422254	-1.67602	88	RPS21, NOB1, NHP2, RRS1, ZNRD1, BOP1, EXOSC5, APEX1, SND1, TRIR, POP4, EXOSC2, EXOSC4, EXOSC8, POP1, UTP20, BMS1, XRN2, TBL3, POP7, ISG20L2, NOP9, EXOSC9, RPP40, RCL1, KRI1, HELZ2, ELAC2, POLR2I, ERI3, SLFN11, POP5, CPSF6, DGCR8, CPSF3, TSEN2, UTP23, RPP38, DIS3L2, DCPS	Not Improvers	Shared
GO_RESPONSE_TO_FIBROBLAST_GROWTH_FACTOR	0.00147942	0.0136176	0.45506	-0.478739	-1.79178	61	HNRNPA1, HNRNPM, THBS1, ZFP36L1, SPRY2, FGFR1, FGF2, GTF2F1, FGFBP1, PTBP1, SHISA2, ZFP36, HNRNPF, FGFRL1, GTF2F2, GPC1, POLR2L, HHIP, FIBP, POLR2E, POLR2I, CD44, IER2, MAPK1, SFRP1	Not Improvers	Unique
GO_POSITIVE_REGULATION_OF_EPITHELIAL_CELL_DIFFERENTIATION	0.00149478	0.013713	0.45506	-0.614353	-1.84559	21	SFRP4, SERPINE1, BMP6, CYP27B1, SFN, FGF2, LIF, CDH5	Not Improvers	Shared
GO_ENDOTHELIUM_DEVELOPMENT	0.00151111	0.0137707	0.45506	-0.485987	-1.75707	47	MSN, MYADM, EDF1, BMP6, VCL, KDR, STARD13, ROBO4, HEY2, TNFRSF1A, CDH5, NOTCH4, KDM6B, SOX18, ZEB1, RAPGEF2, APOLD1, S1PR1, CLIC4	Not Improvers	Shared
GO_DNA_TEMPLATED_TRANSCRIPTION_INITIATION	0.00152671	0.013834	0.45506	-0.386927	-1.61169	120	TEAD4, POLR1E, PSMC3, SRF, ZNRD1, PPARD, CAVIN1, POLR1C, PSMC5, WWTR1, CD3EAP, HEY2, PSMC4, FOSL1, TAF4B, MED8, GTF2F1, TAF1D, NOTCH4, GTF2F2, POLR2L, MAZ, NRBP1, POLR1B, TFB2M, CDK4, TAF12, HMGB1, POLR2E, POLRMT, POLR2I, ERCC2, CCNH, NR1H2, GTF3C5, SMARCB1, MED10, CRCP, TAF5, NR5A2	Not Improvers	Unique
GO_FIBROBLAST_GROWTH_FACTOR_RECEPTOR_SIGNALING_PATHWAY	0.00152815	0.013834	0.45506	-0.500219	-1.80865	48	HNRNPA1, HNRNPM, THBS1, SPRY2, FGFR1, FGF2, GTF2F1, FGFBP1, PTBP1, SHISA2, HNRNPF, FGFRL1, GTF2F2, GPC1, POLR2L, HHIP, FIBP, POLR2E, POLR2I	Not Improvers	Unique
GO_ESTABLISHMENT_OF_ENDOTHELIAL_BARRIER	0.00162316	0.0145978	0.45506	-0.623808	-1.82575	19	MSN, MYADM, VCL, ROBO4, TNFRSF1A, CDH5, SOX18, RAPGEF2	Not Improvers	Unique
GO_FOCAL_ADHESION_ASSEMBLY	0.00174584	0.0156498	0.45506	-0.491932	-1.76722	46	S100A10, VCL, FERMT2, KDR, TEK, ACTG1, TRIP6, THBS1, CORO1C, ITGA2, MAP4K4, PPM1F, APOD, DAPK3, ABL1, ARHGAP6, PTK2, TESK2, SLK, RHOA, SFRP1, DLC1	Not Improvers	Shared
GO_POSTREPLICATION_REPAIR	0.0017966	0.0160524	0.45506	-0.58844	-1.82312	24	RPS27A, ISG15, UBA52, USP43, POLD2, VCP, UFD1, MAD2L2, RFC4, USP10, RFC1, MSH2	Not Improvers	Shared
GO_REGULATION_OF_CELL_SUBSTRATE_ADHESION	0.00180261	0.0160537	0.45506	-0.403203	-1.64838	105	FERMT1, S100A10, SERPINE1, MYADM, VCL, KDR, TEK, ACTG1, FLNA, FBLN1, C1QBP, CIB1, THBS1, CORO1C, ILK, CCR7, MAP4K4, PPM1F, NF2, ITGA3, ITGA5, RSU1, APOD, FOXF1, DAPK3, GBP1, ACTN4, SPOCK2	Not Improvers	Unique
GO_RESPONSE_TO_ESTROGEN	0.00180976	0.0160653	0.45506	-0.561241	-1.84343	30	TEK, GAL, CYP27B1, TGFB3, CAV1, SFR1, WBP2, LDHA, KRT19, SRA1, ABCC2, MAPK1, SFRP1, SLC34A2, CITED4, CTNNA1, PDGFRB	Not Improvers	Unique
GO_REGULATION_OF_TRANSMEMBRANE_RECEPTOR_PROTEIN_SERINE_THREONINE_KINASE_SIGNALING_PATHWAY	0.0018937	0.0167023	0.45506	-0.401124	-1.63267	104	FERMT1, SFRP4, RPS27A, BMP6, SMAD7, UBA52, TGFB3, THBS1, ILK, CAV1, SPRY2, WWTR1, CHRDL1, LOX, FST, ITGA3, GPC3, PARP1, TGFB1, SMURF1, MIR17HG, CDH5, INHA, ABL1, STUB1, ZEB1, FKBP1A, FSTL3, GDF6, GIPC1, TGFBR3, INHBB	Not Improvers	Unique
GO_EMBRYO_DEVELOPMENT	0.00194137	0.0170134	0.45506	-0.295926	-1.38713	442	TEAD4, MDFI, JUNB, RPL10, RACK1, RPS7, MYADM, SOCS3, NLE1, ADAMTS3, UGDH, NSDHL, RPL38, EPHB2, PDGFB, KDR, PSMC3, BTF3, SRF, EIF4A3, TGFB3, PFN1, TRIP6, CCNB1IP1, PRMT1, ITGA2, YBX3, ZFP36L1, KPNA7, HSD17B7, ACTL6A, ADGRF5, SPRY2, GATA2, ARHGDIG, FGFR1, LFNG, FGF2, TIE1, TM4SF1, TBX2, MTHFD1L, FURIN, APLNR, NF2, VASP, HEY2, ITGA3, ITGA5, TCOF1, GPC3, PSMC4, BYSL, THOC5, NRP2, FOSL1, CFL1, TGFB1, …	Not Improvers	Unique
GO_ENDOTHELIAL_CELL_DEVELOPMENT	0.0019645	0.0171612	0.431708	-0.564308	-1.7957	27	MSN, MYADM, VCL, ROBO4, TNFRSF1A, CDH5, NOTCH4, SOX18, RAPGEF2, CLIC4	Not Improvers	Shared
GO_CELL_CYCLE_G1_S_PHASE_TRANSITION	0.00201135	0.0175148	0.431708	-0.372591	-1.575	139	MYC, EIF4EBP1, MCM6, ADAMTS1, MCM7, MCM5, PHB2, MCM4, MCM3, RPL26, CTDSP2, APEX1, PRMT1, PSME2, SFN, GFI1, CDC34, CTDSP1, CDK2, PSME3, EIF4G1, KHDRBS1, NASP, POLE3, MCM2, GSPT1, ZPR1, PPAT, CCND2, CDK4, CARM1, MTBP, BTG2, SLFN11, CCNH, POLE4, EIF4E, WEE1, POLA2, PLCB1, NACC2, POLA1, CNOT9, APPL1, GADD45A, CASP2, ORC1, UBE2E2	Not Improvers	Shared
GO_TRANSCRIPTION_ELONGATION_FROM_RNA_POLYMERASE_I_PROMOTER	0.00214874	0.0183614	0.431708	-0.618013	-1.80879	19	POLR1E, ZNRD1, POLR1C, CD3EAP, TAF1D, POLR2L, POLR1B, POLR2E, ERCC2, CCNH	Not Improvers	Unique
GO_REGULATION_OF_HEMOPOIESIS	0.00218434	0.0186076	0.431708	-0.338341	-1.49699	214	MYC, UBASH3B, PNP, PSMB7, NME1, SMAD7, PSMC3, ISG15, PSMD2, PRELID1, PSMB1, CIB1, THBS1, PRMT1, PSME2, PSMD13, SART1, ZFP36L1, ETS1, PSMB3, EIF6, PSMD6, PSMC5, AXL, PDCD2, GATA2, PSMD3, PSMD14, LOX, PSMD8, XRCC6, IRF7, PSMC4, PSMA7, TGFB1, LIF, PSMB6, PUS7, PSMD1, MIR17HG, PSMB4, PSMD11, PSME3, ZFP36, PSMB2, INHA, PSMD4, FANCA, RUNX1, PSMD7, TCF7, ABL1, ZEB1, STAT5B, FSTL3, TMEM131L, PSMD12, HMGB…	Not Improvers	Shared
GO_MRNA_3_END_PROCESSING	0.00224389	0.0190557	0.431708	-0.483758	-1.75413	50	SNRPA, PABPC1, EIF4A3, DDX39A, SRSF7, ZFP36L1, ALYREF, SRSF2, THOC5, SSU72, CLP1, SRSF3, RNPS1, BARD1, THOC6, RNF40, HSF1, CPSF6, CTR9, POLDIP3, CPSF3, SRSF9	Not Improvers	Unique
GO_POSITIVE_REGULATION_OF_RESPONSE_TO_BIOTIC_STIMULUS	0.00228993	0.0192852	0.431708	-0.391365	-1.62316	116	PSMB7, RPS19, BMP6, PSMC3, PSMD2, PSMB1, PSME2, PSMD13, PSMB3, PSMD6, PSMC5, PSMD3, PSMD14, PSMD8, XRCC6, IRF7, PSMC4, PSMA7, MUC6, RAF1, COCH, PSMB6, RELB, HRAS, PSMD1, PSMB4, PSMD11, PSME3, PSMB2, PSMD4, PQBP1, PSMD7, PGC, STAT5B, RELA, POLR3C, PSMD12, HMGB1, CGAS, PSME4, NRAS, PSMF1, NONO, PARP9	Not Improvers	Shared
GO_CANONICAL_WNT_SIGNALING_PATHWAY	0.00238209	0.0199092	0.431708	-0.3596	-1.54809	159	FERMT1, SFRP4, NLE1, PSMB7, PSMC3, PSMD2, PSMB1, PSME2, PSMD13, RUVBL1, ILK, CAV1, PSMB3, PSMD6, PSMC5, WWTR1, PSMD3, PSMD14, PSMD8, GPC3, PSMC4, PSMA7, TGFB1, PSMB6, PSMD1, PSMB4, PSMD11, VCP, PSME3, PSMB2, PSMD4, DAPK3, CCAR2, PSMD7, MAD2L2, TLE3, TCF7, SNAI2, LGR4, GPRC5B, TMEM131L, PSMD12, PSME4, CTDNEP1, G3BP1, PSMF1, CSNK1D, TMEM88	Not Improvers	Unique
GO_ENZYME_LINKED_RECEPTOR_PROTEIN_SIGNALING_PATHWAY	0.00239151	0.0199092	0.431708	-0.291294	-1.37152	468	FERMT1, SFRP4, UBASH3B, EIF4EBP1, SOCS3, ADAMTS3, VIM, RPS27A, HNRNPA1, EPHB1, BMP6, ZYX, FERMT2, EPHB2, LIFR, CDC37, PDGFB, KDR, F3, TEK, SMAD7, JCAD, HNRNPM, ACTG1, UBA52, TGFB3, EFNB2, ACTB, THBS1, IFI6, ILK, CAV1, TYRO3, AXL, SPRY2, WWTR1, FGFR1, CHRDL1, PXN, EPHB3, FGF2, TIE1, LOX, DDIT4, FURIN, TRIO, KALRN, CD3EAP, ACTR3, FST, ITGA3, ITGA5, GPC3, SHC1, DGKD, NRP2, RNF126, PARP1, PGF, INS, T…	Not Improvers	Unique
GO_RESPONSE_TO_VIRUS	0.0023952	0.0199092	0.431708	-0.363251	-1.55288	151	IFITM3, NOP53, BCL3, PHB2, MICA, ISG15, RPS15A, FLNA, C1QBP, EXOSC5, IFI6, ENO1, HMGA1, DDIT4, RIPK3, IRF7, CCT5, ODC1, FOSL1, CFL1, MX1, GTF2F1, EXOSC4, AUP1, DDX21, HSPB1, OAS2, PQBP1, UFD1, GBP1, HNRNPUL1, OAS3, MX2, DDX41, RSAD2, IFIT1, DDX1, RELA, CLPB, RRP1B, POLR3C, MAP3K14, CGAS, ABCE1, G3BP1, POLR3E, SLFN11, MUL1, XPR1, PARP9	Not Improvers	Shared
GO_BLASTOCYST_DEVELOPMENT	0.00249284	0.0206582	0.431708	-0.47119	-1.7409	56	JUNB, NLE1, PSMC3, SRF, CCNB1IP1, KPNA7, ACTL6A, ARHGDIG, TM4SF1, FURIN, PSMC4, BYSL, WDR74, EMG1, GINS4, NASP	Not Improvers	Unique
GO_DNA_STRAND_ELONGATION	0.00256712	0.021146	0.431708	-0.614518	-1.81184	20	MCM7, MCM4, MCM3, POLD2, GINS4, POLE3, RFC4, LIG3, DCLRE1B, POLA1, GINS3, POLE, GINS2	Not Improvers	Unique
GO_REGULATION_OF_TELOMERE_MAINTENANCE	0.0025885	0.0212582	0.431708	-0.536924	-1.8277	35	MYC, HNRNPA1, CCT3, CCT7, CCT6A, CCT5, TINF2, PARP1, NAT10, NABP2, HNRNPD, CCT8, HNRNPC, PINX1, HNRNPA2B1, HNRNPU, USP7, ACD, MAPK1	Not Improvers	Shared
GO_SIGNAL_TRANSDUCTION_BY_P53_CLASS_MEDIATOR	0.00267951	0.0218747	0.431708	-0.370719	-1.54992	129	RPS7, NOP53, RPL11, BCL3, RPL23, SSRP1, RPL5, RRS1, RPL26, BOP1, PRMT1, SFN, PRMT5, DDIT4, TAF4B, NOC2L, CDK2, TMEM109, TFAP4, PPP1R13L, MYBBP1A, RPF2, SNAI2, RFC4, KMT5A, USP10, BARD1, SUPT16H, TAF12, RFFL, HNRNPK, CARM1, BTG2, MBD3, CSNK2A2, CD44, BRPF1, CSNK2A1, TP53BP2, CNOT9, ATRIP, MSH2, GADD45A, CASP2, TAF5, ATAD5, TAF10, BANP, HDAC1, RRP8, EEF1E1	Not Improvers	Shared
GO_CHROMATIN_REMODELING	0.00277632	0.0225977	0.431708	-0.406321	-1.61851	89	MYC, NPM1, PTMA, ACTB, RUVBL1, HMGA1, ACTL6A, SMARCD1, INO80C, DAXX, NPM3, KDM6B, NASP, POLE3, MBD2, CENPX, SCMH1, HNRNPC, CENPH, HMGB1, PSME4, MBD3, CENPV, SRCAP, DNMT1, MIS18A, SMARCC1, CHRAC1, KDM5C, SMARCB1, VPS72	Not Improvers	Unique
GO_PROTEIN_MODIFICATION_BY_SMALL_PROTEIN_CONJUGATION	0.00278973	0.0226013	0.431708	-0.294746	-1.38413	446	RPS2, RACK1, RPS7, RPL11, SOCS3, RPS27A, PSMB7, SPSB1, RPL23, URM1, RPS3, SMAD7, PSMC3, ISG15, CISH, PSMD2, RPL5, PSMB1, SPHK1, UBA52, CCNB1IP1, TRIM47, PSME2, PSMD13, CAV1, PSMB3, NUP88, PSMD6, PSMC5, RNF181, WWTR1, UHRF1, AIMP2, PSMD3, NUP85, PSMD14, PSMD8, CDC34, FBXO2, PSMC4, BFAR, TNFAIP1, RNF121, RNF126, PSMA7, NUP107, DAXX, UBE2J2, MED8, GTPBP4, PSMB6, SMURF1, NUP160, CBLC, PSMD1, PSMB4, D…	Not Improvers	Unique
GO_ATP_DEPENDENT_CHROMATIN_REMODELING	0.00279323	0.0226013	0.431708	-0.519479	-1.79839	37	NPM1, PTMA, ACTB, RUVBL1, ACTL6A, NASP, MBD2, CENPX, HNRNPC, CENPH, PSME4, MBD3, SRCAP, MIS18A, SMARCC1, SMARCB1, VPS72, CECR2, HDAC1	Not Improvers	Unique
GO_DNA_REPLICATION_INDEPENDENT_NUCLEOSOME_ORGANIZATION	0.00285061	0.0229977	0.431708	-0.610115	-1.79886	20	NPM1, RUVBL1, NASP, HAT1, CENPX, CENPH, SUPT16H, MIS18A	Not Improvers	Unique
GO_CELL_SUBSTRATE_JUNCTION_ORGANIZATION	0.00294884	0.0237204	0.431708	-0.465445	-1.70717	53	S100A10, VCL, FERMT2, KDR, TEK, ACTG1, TRIP6, THBS1, CORO1C, ITGA2, MAP4K4, PPM1F, ITGA5, APOD, DAPK3, ABL1, ARHGAP6, PTK2, TESK2, TLN1, SLK, RHOA, SFRP1, DLC1	Not Improvers	Shared
GO_RNA_DEPENDENT_DNA_BIOSYNTHETIC_PROCESS	0.00297818	0.0238167	0.431708	-0.538371	-1.80083	32	HNRNPA1, NHP2, CCT3, CCT7, CCT6A, WRAP53, CCT5, TINF2, NAT10, CCT8, PPIA, HNRNPC, PINX1, RFC1, HNRNPU, ACD, MAPK1	Not Improvers	Shared
GO_PRI_MIRNA_TRANSCRIPTION_BY_RNA_POLYMERASE_II	0.00305589	0.0242564	0.431708	-0.557837	-1.7905	28	PDGFB, SRF, PPARD, ETS1, GATA2, FGF2, SREBF2, FOSL1, TGFB1	Not Improvers	Shared
GO_DNA_RECOMBINATION	0.00305968	0.0242564	0.431708	-0.377703	-1.57577	124	MCM6, MCM7, MCM5, MCM4, MCM3, CCNB1IP1, APEX1, RUVBL1, ACTL6A, INO80C, PSMD14, SFR1, ALYREF, XRCC6, WRAP53, PARP1, TGFB1, TRIP13, NABP1, PPP4C, GINS4, NABP2, XRCC3, CENPX, MAD2L2, RNF168, MCM2, TCF7, KPNA2, HMGB1, CGAS, MCRS1, LIG3, ERCC2, MCM9, NONO, MSH2, MMS19, NFRKB, PSMC3IP, ATAD5, SIRT6, GEN1, AP5Z1, GINS2	Not Improvers	Shared
GO_REGULATION_OF_ANIMAL_ORGAN_MORPHOGENESIS	0.00309526	0.0244677	0.431708	-0.38438	-1.59419	116	MYC, PSMB7, PHB2, PSMC3, PSMD2, PSMB1, PFN1, PSME2, PSMD13, PSMB3, PSMD6, PSMC5, FGFR1, PSMD3, PSMD14, PSMD8, TBX2, GPC3, PSMC4, PSMA7, LIF, PSMB6, SMURF1, ROR1, PSMD1, PSMB4, PSMD11, PSME3, PSMB2, PSMD4, PSMD7, ABL1, SNAI2, LGR4, PSMD12, PSME4, CARM1	Not Improvers	Shared
GO_FC_RECEPTOR_SIGNALING_PATHWAY	0.0031502	0.0247555	0.431708	-0.39028	-1.57403	99	PSMB7, PSMC3, PSMD2, ACTG1, PSMB1, ACTB, PSME2, PSMD13, PSMB3, PSMD6, PSMC5, PSMD3, PSMD14, PSMD8, ACTR3, PSMC4, SHC1, PSMA7, PSMB6, PSMD1, PSMB4, PSMD11, PSME3, PSMB2, PSMD4, PSMD7, ABL1, RELA, PSMD12, PSME4, CDC42, PSMF1, PTK2, GAB2, MAPK1, APPL1	Not Improvers	Unique
GO_TRANSCRIPTION_ELONGATION_FROM_RNA_POLYMERASE_II_PROMOTER	0.00315874	0.0247555	0.431708	-0.49209	-1.75786	44	SSRP1, ADRM1, GTF2F1, WDR43, NELFCD, GTF2F2, POLR2L, RNF168, TCERG1, ELOA, SUPT16H, POLR2E, POLR2I, HNRNPU, ERCC2, CCNH, CTR9, NELFB, MLLT1	Not Improvers	Shared
GO_DNA_STRAND_ELONGATION_INVOLVED_IN_DNA_REPLICATION	0.00317754	0.0248319	0.431708	-0.67219	-1.82274	15	MCM7, MCM4, MCM3, POLD2, GINS4, POLE3, RFC4, LIG3, POLA1, GINS3, POLE, GINS2	Not Improvers	Unique
GO_REGULATION_OF_PROTEIN_LOCALIZATION_TO_NUCLEUS	0.0032512	0.0252636	0.431708	-0.437159	-1.67295	69	FERMT1, RAN, FLNA, PKIG, CCT3, CCT7, IPO5, CCT6A, NF2, CCT5, LMNA, BYSL, PARP1, INS, TGFB1, LIF, APOD, NOLC1, CCT8, TARDBP, NUTF2, ZPR1, CDH1, PINX1, NUP62, MCRS1	Not Improvers	Shared
GO_SPLICEOSOMAL_COMPLEX_ASSEMBLY	0.00331979	0.0257237	0.431708	-0.532114	-1.73295	29	SNRPE, SNRPD2, SNRPC, SNRPD1, PUF60, DDX23, RBMX, PRPF6, SF3A3, SF3A2, SNRPG, DDX1, PTBP2, SFSWAP	Not Improvers	Unique
GO_REPRODUCTIVE_SYSTEM_DEVELOPMENT	0.0034012	0.0262064	0.431708	-0.339397	-1.47892	186	MDFI, JUNB, HMGCS1, SOCS3, ADAMTS1, BMP6, NSDHL, MGST1, PDGFB, CYP27B1, FLNA, DHCR24, PPARD, YBX3, ZFP36L1, SLIT3, TYRO3, AXL, GATA2, LFNG, HEY2, FST, FOSL1, NUP107, LIF, KRT19, NDUFS6, NUDT1, INHA, NASP, MAMLD1, VGF, MMP19, FANCA, PRDX4, DHX37, TCF7, EPAS1, PHLDA2, STAT5B, LGR4, FSTL3, RRM1, PLEKHA1	Not Improvers	Unique
GO_CELL_SUBSTRATE_ADHESION	0.00351411	0.0268502	0.431708	-0.344281	-1.49916	175	FERMT1, S100A10, SERPINE1, MYADM, EPHB1, ZYX, VCL, FERMT2, KDR, TEK, SRF, TNFRSF12A, ACTG1, FLNA, FBLN1, TRIP6, C1QBP, PPARD, CIB1, THBS1, CORO1C, ITGA2, ILK, CCR7, TYRO3, AXL, PXN, EPHB3, MAP4K4, PPM1F, NF2, ITGA3, ITGA5, RSU1, APOD	Not Improvers	Shared
GO_PROTEIN_IMPORT	0.00360065	0.027302	0.431708	-0.392373	-1.56845	92	FERMT1, PHB2, RPL23, PDCD5, RAN, FLNA, PKIG, KPNA7, NUP88, IPO5, NUP85, LMNA, NUP107, TGFB1, APOD, TOMM40, KPNB1, ROMO1, NOLC1, NXT1, TARDBP, NUTF2, ELAVL1, TOMM22, ZPR1, IPO7, CDH1, TIMM50, KPNA2, NUP62, SAMM50, PEX10, GCKR	Not Improvers	Shared
GO_EMBRYO_DEVELOPMENT_ENDING_IN_BIRTH_OR_EGG_HATCHING	0.00363408	0.0274608	0.431708	-0.308006	-1.39698	283	MDFI, JUNB, RPS7, SOCS3, NLE1, ADAMTS3, NSDHL, PDGFB, PSMC3, BTF3, SRF, EIF4A3, TGFB3, PFN1, TRIP6, CCNB1IP1, PRMT1, YBX3, ZFP36L1, KPNA7, HSD17B7, ACTL6A, ADGRF5, GATA2, ARHGDIG, FGFR1, LFNG, TIE1, TM4SF1, MTHFD1L, FURIN, VASP, HEY2, TCOF1, PSMC4, BYSL, FOSL1, CFL1, TGFB1, LIF, WDR74, YBX1, KRT19, EMG1, FOXF1, NOLC1, GINS4, NASP, RIC8A, EPN1, MGAT1, PBX1, BRD2, TCF7, ABL1, ZPR1, SOX18, ZEB1, EPA…	Not Improvers	Shared
GO_DNA_SYNTHESIS_INVOLVED_IN_DNA_REPAIR	0.00376475	0.0281125	0.431708	-0.575913	-1.81814	26	RPS27A, ISG15, UBA52, USP43, POLD2, VCP, UFD1, MAD2L2, RFC4, USP10, RFC1, POLA1, FAAP20, POLE	Not Improvers	Shared
GO_RESPONSE_TO_ARSENIC_CONTAINING_SUBSTANCE	0.00376685	0.0281125	0.431708	-0.602418	-1.77617	20	HNRNPA1, DAXX, SRRT, VCP, ATF4, MKNK2, HSF1, ZFAND1, ABCC2	Not Improvers	Unique
GO_TRANSMEMBRANE_RECEPTOR_PROTEIN_SERINE_THREONINE_KINASE_SIGNALING_PATHWAY	0.00378068	0.0281125	0.431708	-0.347239	-1.48024	149	FERMT1, SFRP4, VIM, RPS27A, BMP6, ZYX, FERMT2, SMAD7, UBA52, TGFB3, THBS1, ILK, CAV1, SPRY2, WWTR1, CHRDL1, PXN, LOX, FURIN, FST, ITGA3, GPC3, PARP1, TGFB1, SMURF1, MIR17HG, CDH5, INHA, SLC39A5, ABL1, STUB1, PARD3, ZEB1, FKBP1A, FSTL3, GDF6, GIPC1, ARHGEF18, TGFBR3, INHBB, PTK2, STRAP, FBN1, BMP8B, RHOA, APPL1, SFRP1, USP15, TGFB1I1, CTDSPL2	Not Improvers	Unique
GO_RESPONSE_TO_INTERLEUKIN_12	0.00383865	0.0283812	0.431708	-0.573001	-1.79776	25	MSN, RPLP0, CNN2, PSME2, CFL1, LMNB1, ANXA2, HNRNPF, PPIA, HNRNPDL, SERPINB2, HNRNPA2B1, CDC42, PLCB1, MTAP, CAPZA1, JAK1	Not Improvers	Unique
GO_POSITIVE_REGULATION_OF_CELL_POPULATION_PROLIFERATION	0.00388558	0.0286509	0.431708	-0.291205	-1.35634	391	MYC, RPS9, PNP, ADAMTS1, REG1A, EIF5A, BMP6, NME1, RPL23, RPS4X, LIFR, PDGFB, RPS3, KDR, F3, TEK, JCAD, PLA2G1B, SPHK1, RPS15A, FLNA, TGFB3, NPM1, EFNB2, IRAK1, PPARD, CIB1, THBS1, PRMT1, ITGA2, ILK, REG1B, ETS1, MVD, HMGCR, PDCD2, WWTR1, EDNRB, GATA2, LBH, FGFR1, IL11, FGF2, TBX2, APLNR, CALCRL, HEY2, TSLP, SHC1, ODC1, NRP2, FOSL1, PGF, INS, TGFB1, LIF, CDC123, CDK2, FGFBP1, HRAS, ANXA2, MIR17HG…	Not Improvers	Shared
GO_RESPONSE_TO_WOUNDING	0.00393644	0.0289481	0.407018	-0.30705	-1.39212	288	UBASH3B, SERPINE1, REG1A, PHB2, VCL, CELA2A, EPHB2, PDGFB, KDR, ANO6, F3, SRF, TNFRSF12A, ACTG1, FLNA, TGFB3, FBLN1, C1QBP, EHD1, ACTB, PPARD, THBS1, ITGA2, ILK, ZFP36L1, ETS1, PABPC4, CAV1, CLIC1, TYRO3, AXL, HMGCR, GATA2, FGF2, SLC1A2, LOX, ITGA5, DGKD, TRPC6, ELK3, INS, TGFB1, ID3, PEAR1, MAFK, APOD, C4BPB, RAF1, CSRP1, ANXA5, TFPI2, HRAS, ANXA2, FOXF1, ZFP36, HSPB1, NOTCH4	Not Improvers	Shared
GO_NUCLEAR_CHROMOSOME_SEGREGATION	0.00406418	0.0297282	0.407018	-0.383631	-1.5675	106	PHB2, KIF22, RRS1, RAN, CCNB1IP1, ACTR3, TRIP13, TUBG1, DSCC1, DCTN2, KPNB1, SEH1L, ZW10, CHMP4B, XRCC3, CENPX, CHMP2A, MAD2L2, PINX1, ANAPC5, NUP62, CHMP6, CDC42, HNRNPU, NAA10, SMC1A, ZNF207, ZWINT, SLF1, IK, KNSTRN, BUB3, DIS3L2, GEN1, MSTO1	Not Improvers	Unique
GO_NEGATIVE_REGULATION_OF_PROTEIN_MODIFICATION_PROCESS	0.00408615	0.0298058	0.407018	-0.309373	-1.39864	294	MYC, PPP1R14B, UBASH3B, RGS2, RACK1, RPS7, MYADM, RPL11, SOCS3, SPINK1, EPHB2, RPL23, GADD45B, RPS3, SMAD7, ISG15, RPL5, PKIG, NPM1, FBLN1, CTDSP2, CIB1, IGBP1, CORO1C, ILK, CAV1, SFN, SPRY2, HMGCR, WWTR1, DMD, IPO5, DDIT4, PPM1F, PWP1, DUSP14, NF2, TINF2, TGFB1, DUSP7, LIF, CTDSP1, NOC2L, GTPBP4, ITPRIP, CBLC, EIF4G1, HSPB1, PTPRB, TFAP4, GBP1, TARDBP, KIRREL1, MAD2L2, LMO3, ABL1, CACTIN, PARD3,…	Not Improvers	Unique
GO_REGULATION_OF_RESPONSE_TO_EXTERNAL_STIMULUS	0.00415655	0.0300829	0.407018	-0.291315	-1.36592	439	UBASH3B, SELE, SERPINE1, NOP53, SOCS3, PSMB7, RPS19, BMP6, ZYX, CELA2A, SEMA7A, EPHB2, CDC37, PDGFB, KDR, ANO6, F3, TEK, PSMC3, MICA, CYP27B1, PSMD2, IL1RL1, PSMB1, SPHK1, C1QBP, EFNB2, IL1R2, PPARD, THBS1, ITGA2, CCL7, PSME2, PSMD13, ETS1, CAV1, PSMB3, CCR7, PSMD6, PSMC5, TYRO3, HMGCR, EDNRB, FGFR1, FGF2, PSMD3, PSMD14, PSMD8, PPM1F, LDLR, XRCC6, IRF7, CALCRL, TSLP, MVK, PSMC4, NLRC3, SPX, PSMA7…	Not Improvers	Unique
GO_COAGULATION	0.00421435	0.0304209	0.407018	-0.344228	-1.47355	155	UBASH3B, SERPINE1, VCL, CELA2A, EPHB2, PDGFB, ANO6, F3, SRF, ACTG1, FLNA, FBLN1, C1QBP, EHD1, ACTB, THBS1, ITGA2, ILK, PABPC4, CAV1, CLIC1, TYRO3, AXL, GATA2, DGKD, TRPC6, PEAR1, MAFK, C4BPB, RAF1, CSRP1, ANXA5, TFPI2, ANXA2	Not Improvers	Unique
GO_WOUND_HEALING	0.00433854	0.0309107	0.407018	-0.326387	-1.46003	236	UBASH3B, SERPINE1, REG1A, VCL, CELA2A, EPHB2, PDGFB, KDR, ANO6, F3, SRF, TNFRSF12A, ACTG1, FLNA, TGFB3, FBLN1, C1QBP, EHD1, ACTB, PPARD, THBS1, ITGA2, ILK, ETS1, PABPC4, CAV1, CLIC1, TYRO3, AXL, HMGCR, GATA2, FGF2, LOX, ITGA5, DGKD, TRPC6, ELK3, INS, TGFB1, PEAR1, MAFK, C4BPB, RAF1, CSRP1, ANXA5, TFPI2, HRAS, ANXA2, HSPB1, NOTCH4	Not Improvers	Shared
GO_CHROMATIN_ASSEMBLY_OR_DISASSEMBLY	0.00443857	0.0312822	0.407018	-0.430735	-1.64837	69	NPM1, ANP32B, RUVBL1, HMGA1, SMARCD1, GRWD1, DAXX, NOC2L, NASP, HAT1, POLE3, MBD2, CENPX, MCM2, BRD2, CENPH, SUPT16H, MBD3, CENPV, DNMT1, MIS18A, SMARCC1, SET, SMARCB1, CHAF1A, SIRT6, MAP1S, HDAC1, RRP8	Not Improvers	Unique
GO_SUBSTRATE_ADHESION_DEPENDENT_CELL_SPREADING	0.00444771	0.0312822	0.407018	-0.45415	-1.68516	57	S100A10, MYADM, FERMT2, TEK, FLNA, FBLN1, C1QBP, CIB1, CORO1C, ILK, TYRO3, AXL, PXN, EPHB3, GBP1, ACTN4, ABL1, PARVA, HAS2, CDC42, PTK2, ITGB3	Not Improvers	Unique
GO_SNRNA_METABOLIC_PROCESS	0.00447087	0.0313647	0.407018	-0.650058	-1.80876	16	NHP2, EXOSC5, EXOSC2, EXOSC4, EXOSC8, EXOSC9, INTS11, INTS12	Not Improvers	Shared
GO_SPROUTING_ANGIOGENESIS	0.0045415	0.0316981	0.407018	-0.461571	-1.70365	55	KDR, TEK, SRF, JCAD, EFNB2, STARD13, CIB1, THBS1, GATA2, FGF2, APLNR, ITGA5, PGF, FGFBP1, EPN1, FLT4, ABL1, CLEC14A, PARVA, MAP3K3, MMRN2	Not Improvers	Shared
GO_REGULATION_OF_SUBSTRATE_ADHESION_DEPENDENT_CELL_SPREADING	0.00459934	0.03199	0.407018	-0.532686	-1.74964	30	S100A10, MYADM, FLNA, FBLN1, C1QBP, CIB1, CORO1C, GBP1, ACTN4, ABL1, HAS2, CDC42, PTK2	Not Improvers	Unique
GO_EMBRYONIC_PLACENTA_DEVELOPMENT	0.0046294	0.0320298	0.407018	-0.487334	-1.73405	42	MDFI, JUNB, SOCS3, NSDHL, PDGFB, ZFP36L1, GATA2, HEY2, LIF, KRT19, EPAS1, PHLDA2	Not Improvers	Shared
GO_ANIMAL_ORGAN_MORPHOGENESIS	0.00463574	0.0320298	0.407018	-0.284602	-1.33544	443	MSN, MDFI, SFRP4, MYC, SERPINE1, ADAMTS1, NLE1, PSMB7, EPHB1, BMP6, PHB2, RPL38, EPHB2, MGP, TEK, SMAD7, PSMC3, SRF, PSMD2, EIF4A3, PSMB1, TGFB3, PFN1, ELN, EFNB2, ITGA2, PSME2, PSMD13, ILK, FSCN2, CAV1, PSMB3, PSMD6, PSMC5, SLIT3, SPRY2, WWTR1, GATA2, FGFR1, LFNG, FGF2, PSMD3, PSMD14, CDSN, PSMD8, TBX2, MTHFD1L, NF2, HEY2, FST, GPC3, PSMC4, NRP2, PSMA7, PGF, TGFB1, ID3, NFIC, LIF, TPRN, PSMB6, S…	Not Improvers	Unique
GO_HOMOTYPIC_CELL_CELL_ADHESION	0.00495169	0.0338716	0.407018	-0.484388	-1.69826	40	UBASH3B, VCL, CELA2A, ACTG1, FLNA, ACTB, ILK, CLIC1, TYRO3, PEAR1, CSRP1, HSPB1	Not Improvers	Unique
GO_MODIFICATION_DEPENDENT_MACROMOLECULE_CATABOLIC_PROCESS	0.00509778	0.0347841	0.407018	-0.299919	-1.38008	329	RACK1, RPS7, NOP53, RPL11, RPS27A, PSMB7, SPSB1, RPL23, SMAD7, PSMC3, ISG15, PSMD2, RPL5, PSMB1, UBA52, USP43, PSME2, PSMD13, ADRM1, CAV1, PSMB3, PSMD6, PSMC5, WWTR1, UHRF1, PSMD3, PSMD14, PSMD8, CDC34, FBXO2, SEC61B, PSMC4, BFAR, TNFAIP1, RNF121, RNF126, PSMA7, EXOSC2, UBE2J2, SGTA, PSMB6, CDK2, EXOSC8, SMURF1, AUP1, CBLC, PSMD1, PSMB4, PSMD11, VCP, PSME3, PSMB2, PSMD4, DERL3, NSFL1C, UFD1, FBXL…	Not Improvers	Unique
GO_REGULATION_OF_DEFENSE_RESPONSE	0.0051576	0.0349275	0.407018	-0.30701	-1.39608	298	SELE, SERPINE1, NOP53, SOCS3, PSMB7, RPS19, ZYX, SEMA7A, CDC37, TEK, PSMC3, MICA, PSMD2, IL1RL1, PSMB1, SPHK1, C1QBP, IL1R2, PPARD, ITGA2, PSME2, PSMD13, ETS1, PSMB3, CCR7, PSMD6, PSMC5, TYRO3, EDNRB, PSMD3, PSMD14, PSMD8, LDLR, XRCC6, IRF7, CALCRL, TSLP, MVK, PSMC4, NLRC3, PSMA7, INS, MUC6, APOD, RAF1, COCH, PSMB6, RELB, TNFRSF1A, HRAS, DUOXA1, PSMD1, PSMB4, PSMD11, CXCL17, FOXF1, PSME3, CDH5, P…	Not Improvers	Shared
GO_REGULATION_OF_CELL_MIGRATION_INVOLVED_IN_SPROUTING_ANGIOGENESIS	0.0051596	0.0349275	0.407018	-0.595302	-1.75519	20	KDR, JCAD, STARD13, CIB1, THBS1, GATA2, FGF2, FGFBP1, ABL1, MAP3K3, MMRN2	Not Improvers	Unique
GO_TRNA_MODIFICATION	0.005167	0.0349275	0.407018	-0.460228	-1.6688	50	WDR4, URM1, THG1L, METTL1, HSD17B10, TPRKB, PUS1, FTSJ1, PUS3, PUS7, DUS3L, NAT10, CTU2, QTRT1, TYW3, LCMT2, BCDIN3D, ADAT3, DUS2, TRMT13, MOCS3, CTU1, ADAT2, TRMU, TRMT10B	Not Improvers	Shared
GO_CIRCULATORY_SYSTEM_DEVELOPMENT	0.00519833	0.0350344	0.407018	-0.282329	-1.33324	481	PDLIM7, JUNB, RGS2, SERPINE1, HAMP, SOCS3, ADAMTS1, EPHB1, NSDHL, EPHB2, FOXS1, DHCR7, PDGFB, KDR, F3, TEK, SMAD7, SRF, TNFRSF12A, JCAD, ACTG1, SPHK1, ELN, EFNB2, PPARD, STARD13, CIB1, THBS1, ANP32B, ILK, ZFP36L1, ETS1, CAV1, ANPEP, SLIT3, ADGRF5, SPRY2, GATA2, FGFR1, EPHB3, FGF2, TIE1, PTPN14, LOX, TBX2, LDLR, APLNR, ROBO4, ANGPTL2, CALCRL, HEY2, ITGA3, ITGA5, LMNA, GPC3, SHC1, NRP2, FOSL1, ELK3…	Not Improvers	Unique
GO_RIBONUCLEOSIDE_MONOPHOSPHATE_METABOLIC_PROCESS	0.00523389	0.0351877	0.407018	-0.567963	-1.79305	26	PRPS2, IMPDH2, APRT, UCK2, UPP1, ADK, GART, PAICS, PFAS, UMPS, GUK1, PPAT, ATIC	Not Improvers	Unique
GO_SIGNAL_TRANSDUCTION_BY_PROTEIN_PHOSPHORYLATION	0.00526632	0.0352628	0.407018	-0.286001	-1.33937	432	MYC, RGS2, LPAR3, RPS27A, PSMB7, EPHB1, PHB2, SEMA7A, RASGRP3, EPHB2, RASAL2, GADD45B, PDGFB, RPS3, KDR, TEK, PSMC3, PSMD2, JCAD, PLA2G1B, PSMB1, SPHK1, UBA52, TGFB3, FBLN1, IRAK1, CIB1, IGBP1, THBS1, PRMT1, CCL7, PSME2, PSMD13, ILK, ZFP36L1, CAV1, PSMB3, CCR7, AKAP12, PSMD6, PSMC5, SPRY2, PRMT5, HMGCR, LBH, FGFR1, IL11, FGF2, PSMD3, PSMD14, PSMD8, MAP4K4, DUSP14, ZNF622, NF2, PLVAP, PSMC4, SHC1,…	Not Improvers	Unique
GO_NEGATIVE_REGULATION_OF_CELLULAR_CATABOLIC_PROCESS	0.00541652	0.0358877	0.407018	-0.371131	-1.53032	110	RPS7, NOP53, RPL11, RPL23, PABPC1, RPL5, YBX3, FURIN, DHX34, INS, SGTA, YBX1, ANXA2, EIF4G1, ZFP36, DERL3, CHMP4B, HNRNPD, TARDBP, PKP3, CCAR2, ELAVL1, MAPKAPK2, HNRNPC, CIRBP, SYNCRIP, AQP11, LAMP3, GIPC1, CSNK2A2, USP36, HNRNPU, PSMF1, EIF4G2, USP7, PTK2, CSNK2A1, SMARCC1, LZTS1, VIP, MCL1	Not Improvers	Unique
GO_REGULATION_OF_CELL_MATRIX_ADHESION	0.00543144	0.0358999	0.407018	-0.425203	-1.63011	67	FERMT1, S100A10, SERPINE1, VCL, KDR, TEK, ACTG1, CIB1, THBS1, CORO1C, ILK, CCR7, MAP4K4, PPM1F, NF2, APOD	Not Improvers	Unique
GO_REGULATION_OF_CELLULAR_CATABOLIC_PROCESS	0.00585304	0.0384088	0.407018	-0.286735	-1.33918	418	MSN, RACK1, RPS7, NOP53, RPL11, VIM, RPS27A, PSMB7, PHB2, RPL23, EEF1A1, CDC37, KDR, SMAD7, PSMC3, PABPC1, PSMD2, RPL5, HNRNPM, PSMB1, UBA52, NPM1, EXOSC5, APEX1, PSME2, PSMD13, YBX3, ZFP36L1, PABPC4, CAV1, PSMB3, PSMD6, PSMC5, PSMD3, PSMD14, PSMD8, FURIN, SREBF2, LDLR, DHX34, PSMC4, HNRNPR, PSMA7, INS, EXOSC2, SERBP1, SGTA, PSMB6, EXOSC4, YBX1, EXOSC8, SMURF1, PSMD1, ANXA2, PSMB4, PSMD11, VCP, P…	Not Improvers	Unique
GO_NEGATIVE_REGULATION_OF_CELLULAR_PROTEIN_CATABOLIC_PROCESS	0.00608491	0.0396459	0.407018	-0.511447	-1.74098	35	RPS7, NOP53, RPL11, RPL23, RPL5, FURIN, SGTA, ANXA2, DERL3, CCAR2, AQP11, LAMP3, GIPC1, CSNK2A2, PSMF1, USP7, CSNK2A1, SMARCC1	Not Improvers	Unique
GO_POSITIVE_REGULATION_OF_EPITHELIAL_CELL_MIGRATION	0.00620306	0.0403199	0.407018	-0.419287	-1.60849	70	PDGFB, KDR, TEK, JCAD, PFN1, CIB1, THBS1, ITGA2, ETS1, GATA2, FGFR1, FGF2, MAP4K4, PPM1F, ITGA3, NRP2, TGFB1, FGFBP1, HSPB1, FLT4, ABL1, MAP3K3, AAMP, HMGB1, MAP2K3, HAS2	Not Improvers	Shared
GO_PROTEASOMAL_PROTEIN_CATABOLIC_PROCESS	0.00623526	0.04037	0.407018	-0.31092	-1.39574	248	RACK1, NOP53, RPL11, RPS27A, PSMB7, SPSB1, SMAD7, PSMC3, PSMD2, PSMB1, UBA52, PSME2, PSMD13, CAV1, PSMB3, PSMD6, PSMC5, WWTR1, PSMD3, PSMD14, PSMD8, CDC34, FBXO2, SEC61B, PSMC4, BFAR, TNFAIP1, RNF121, RNF126, PSMA7, UBE2J2, SGTA, PSMB6, CDK2, SMURF1, AUP1, PSMD1, PSMB4, PSMD11, VCP, PSME3, PSMB2, PSMD4, DERL3, NSFL1C, UFD1, FBXL13, CCAR2, PSMD7, FBXL6, TMUB1, STUB1, HSPBP1, RAD23A, ANAPC5, PSMD12…	Not Improvers	Unique
GO_POSITIVE_REGULATION_OF_MITOTIC_CELL_CYCLE	0.00655174	0.0419284	0.407018	-0.403315	-1.56572	74	EIF4EBP1, ADAMTS1, PHB2, PDGFB, SPHK1, APEX1, FGFR1, INS, EIF4G1, NSFL1C, XRCC3, PBX1, ABL1, STAT5B, CCND2, CDK4, ANAPC5, NUP62, MTBP, HSF1, HNRNPU, EIF4E, PLCB1, TMOD3, SLF1, TGFA, UBE2E2, PDGFRB, GEN1	Not Improvers	Shared
GO_REGULATION_OF_STEROID_METABOLIC_PROCESS	0.00655752	0.0419284	0.407018	-0.430271	-1.60354	60	FDPS, HMGCS1, FDFT1, BMP6, DHCR7, GAL, CYP27B1, RAN, SQLE, MVD, HMGCR, GFI1, SREBF2, LDLR, MVK, KPNB1, CYP51A1, LSS, STUB1, SNAI2, STAT5B, ELOVL6	Not Improvers	Unique
GO_TISSUE_MIGRATION	0.00662005	0.0422297	0.407018	-0.3447	-1.46337	146	FERMT1, PDGFB, KDR, TEK, SRF, PRSS3, JCAD, PFN1, EFNB2, PPARD, STARD13, S100A2, CIB1, THBS1, CORO1C, ITGA2, ETS1, GATA2, FGFR1, PXN, FGF2, MAP4K4, PPM1F, ITGA3, NRP2, TGFB1, FGFBP1, FOXF1, CDH5, HSPB1, FLT4, ABL1, SOX18, CLEC14A, APOH, MAP3K3, AAMP, ANGPT2, HMGB1, MMRN2, MAP2K3, HAS2, GIPC1, PKN3	Not Improvers	Shared
GO_RESPONSE_TO_DSRNA	0.00667063	0.0424537	0.407018	-0.601422	-1.7339	18	NPM1, CAV1, DDX21, PQBP1, IFIT1, DDX1, CGAS, MUL1, MAPK1, PELI1, ZCCHC3	Not Improvers	Unique
GO_NEGATIVE_REGULATION_OF_CATABOLIC_PROCESS	0.00676218	0.0427012	0.407018	-0.352779	-1.49191	140	RPS7, NOP53, RPL11, RPL23, PABPC1, RPL5, FLNA, YBX3, HMGCR, DDIT4, FURIN, DHX34, INS, SGTA, YBX1, ANXA2, EIF4G1, ZFP36, DERL3, CYP51A1, CHMP4B, HNRNPD, TARDBP, PKP3, CCAR2, ELAVL1, MAPKAPK2, MAD2L2, SF3B3, HNRNPC, RELA, CIRBP, SYNCRIP, AQP11, LAMP3, GIPC1, DYSF, CSNK2A2, USP36, HNRNPU, PSMF1, EIF4G2, USP7, PTK2, CSNK2A1, SMARCC1, LZTS1, VIP, MCL1, AZIN1, WASHC1	Not Improvers	Unique
GO_DOUBLE_STRAND_BREAK_REPAIR	0.00677179	0.0427012	0.407018	-0.364891	-1.52185	123	MCM6, MCM7, MCM5, MCM4, MCM3, CIB1, TDP1, PSMD14, SFR1, XRCC6, WRAP53, PARP1, TRIP13, NABP1, PPP4C, VCP, UIMC1, GINS4, NABP2, XRCC3, MAD2L2, RNF168, MCM2, DDX1, BARD1, MDC1, CGAS, LIG3, HSF1, DCLRE1B, MCM9, PARP9, OTUB1, POLA1, MSH2, MTA1, SLF1, MMS19, SIRT6, GEN1, AP5Z1, GINS2	Not Improvers	Shared
GO_REGULATION_OF_KERATINOCYTE_DIFFERENTIATION	0.00680671	0.042823	0.407018	-0.580752	-1.69973	19	CYP27B1, ZFP36L1, CDSN, ZFP36, REG3G, RUNX1	Not Improvers	Unique
GO_POSITIVE_REGULATION_OF_PRI_MIRNA_TRANSCRIPTION_BY_RNA_POLYMERASE_II	0.00684115	0.0429411	0.407018	-0.569515	-1.71908	22	PDGFB, SRF, ETS1, GATA2, FGF2, SREBF2, FOSL1, TGFB1	Not Improvers	Shared
GO_PLATELET_AGGREGATION	0.00697085	0.0436554	0.407018	-0.520606	-1.71689	31	UBASH3B, VCL, CELA2A, ACTG1, FLNA, ACTB, ILK, CLIC1, TYRO3, PEAR1, CSRP1, HSPB1	Not Improvers	Unique
GO_PROTEIN_SUMOYLATION	0.00703012	0.0439262	0.407018	-0.513902	-1.72665	33	NUP88, NUP85, NUP107, NUP160, SEH1L, NUP37, NUP205, UBE2I, RELA, NUP62, STX1A, MUL1, PIAS3, POM121, UBA2	Not Improvers	Shared
GO_LABYRINTHINE_LAYER_DEVELOPMENT	0.00715736	0.0443956	0.407018	-0.573131	-1.72175	21	JUNB, SOCS3, NSDHL, ZFP36L1, HEY2	Not Improvers	Unique
GO_REGULATION_OF_SIGNAL_TRANSDUCTION_BY_P53_CLASS_MEDIATOR	0.00716997	0.0443956	0.407018	-0.380257	-1.51483	91	RPS7, NOP53, RPL11, RPL23, SSRP1, RPL5, RRS1, RPL26, BOP1, PRMT5, TAF4B, NOC2L, CDK2, PPP1R13L, RPF2, SNAI2, RFC4, KMT5A, BARD1, SUPT16H, TAF12, RFFL, HNRNPK, MBD3, CSNK2A2, CD44, BRPF1, CSNK2A1, TP53BP2, ATRIP, TAF5, ATAD5, TAF10, BANP, HDAC1, EEF1E1	Not Improvers	Unique
GO_RIBOSE_PHOSPHATE_BIOSYNTHETIC_PROCESS	0.00720527	0.0445136	0.407018	-0.384178	-1.53031	89	CTPS1, NME1, PRPS2, IMPDH2, APRT, UCK2, ATP5F1D, ENO1, UPP1, ADK, HSD17B8, ATP5MC1, GART, ELOVL1, PAICS, PARP1, TGFB1, NPPB, PFAS, VCP, ATP5MC2, TKT, CYC1, ELOVL5, UMPS, GUK1, PPAT, ATIC, ELOVL6	Not Improvers	Unique
GO_NUCLEOSIDE_METABOLIC_PROCESS	0.00724342	0.0446488	0.407018	-0.448601	-1.65744	56	PNP, AHCY, NME1, PRPS2, IMPDH2, RAN, APRT, UCK2, UPP1, ADK, DGUOK, NT5C, GNAI3, UMPS, GUK1, PPAT, ATIC, APOBEC2, GTPBP1, CAD, ERH, RHOA	Not Improvers	Unique
GO_REGULATION_OF_RESPONSE_TO_BIOTIC_STIMULUS	0.00730261	0.0449127	0.407018	-0.331227	-1.44511	183	NOP53, SOCS3, PSMB7, RPS19, BMP6, CDC37, PSMC3, MICA, PSMD2, PSMB1, C1QBP, PSME2, PSMD13, PSMB3, PSMD6, PSMC5, TYRO3, PSMD3, PSMD14, PSMD8, XRCC6, IRF7, PSMC4, NLRC3, PSMA7, INS, MUC6, RAF1, COCH, PSMB6, RELB, HRAS, PSMD1, PSMB4, PSMD11, PSME3, PSMB2, PSMD4, PQBP1, UFD1, PSMD7, PGC, LRP8, CACTIN, IFIT1, STAT5B, RELA, POLR3C, PSMD12, HMGB1, CGAS, ABCE1, PSME4	Not Improvers	Unique
GO_REGULATION_OF_GENE_EXPRESSION_EPIGENETIC	0.0073412	0.045049	0.407018	-0.408694	-1.5731	72	POLR1E, ZNRD1, ACTB, HMGA1, POLR1C, SMARCD1, CD3EAP, WBP2, TAF1D, DDX21, CDCA4, HAT1, POLR2L, MYBBP1A, POLR1B, DNMT3B, DOT1L, HMGB1, POLR2E, HNRNPU, DNMT1, ZNF335, PCGF1, MTA1	Not Improvers	Unique
GO_ANTIMICROBIAL_HUMORAL_IMMUNE_RESPONSE_MEDIATED_BY_ANTIMICROBIAL_PEPTIDE	0.00759428	0.0462187	0.407018	-0.567002	-1.71149	22	RPL39, REG1A, RPS19, RPL30, PLA2G1B, REG1B, HMGN2, ROMO1, GAPDH, REG3G, PGC	Not Improvers	Unique
GO_POSITIVE_REGULATION_OF_ENDOTHELIAL_CELL_MIGRATION	0.00759922	0.0462187	0.407018	-0.436245	-1.59075	51	PDGFB, KDR, TEK, JCAD, CIB1, THBS1, ETS1, GATA2, FGFR1, FGF2, NRP2, TGFB1, FGFBP1, HSPB1, FLT4, ABL1, MAP3K3, AAMP, HMGB1, MAP2K3	Not Improvers	Shared
GO_POSITIVE_REGULATION_OF_SPROUTING_ANGIOGENESIS	0.00765526	0.0464566	0.407018	-0.568594	-1.70813	21	KDR, JCAD, CIB1, GATA2, FGF2, APLNR, ITGA5, FGFBP1, ABL1, MAP3K3	Not Improvers	Shared
GO_CELLULAR_RESPONSE_TO_VASCULAR_ENDOTHELIAL_GROWTH_FACTOR_STIMULUS	0.00784472	0.047289	0.38073	-0.506635	-1.7125	34	MT1G, ADAMTS3, KDR, JCAD, SPHK1, SPRY2, NRP2, PGF, HSPB1, FLT4, MAPKAPK2, RELA, MAP2K3	Not Improvers	Unique
GO_ALCOHOL_BIOSYNTHETIC_PROCESS	0.00784984	0.047289	0.38073	-0.396642	-1.55589	81	ACAT2, FDPS, HMGCS1, FDFT1, BMP6, NSDHL, DHCR7, CYP27B1, RAN, SQLE, SPHK1, DHCR24, MVD, HSD17B7, MSMO1, HMGCR, FGF2, GFI1, SREBF2, MVK	Not Improvers	Unique
GO_OSSIFICATION	0.00786439	0.047289	0.38073	-0.330957	-1.44114	175	PDLIM7, JUNB, RPS15, BMP6, RPL38, SEMA7A, TPM4, FBL, ANO6, MGP, TEK, SMAD7, ISG15, CYP27B1, TGFB3, CEBPD, ILK, CLIC1, WWTR1, SND1, CHRDL1, RSL1D1, LOX, ALYREF, GPC3, RRAS2, TGFB1, ID3, GTPBP4, SMURF1, RBMX, DDX21, ATF4, RUNX1, MYBBP1A, PBX1, SNAI2, HNRNPC, LGR4, FSTL3, CHSY1, S1PR1, SYNCRIP, HNRNPU, ERCC2, IL6R, PTK2, RFLNB, MAPK1, EXT2, BMP8B, RHOA, RFLNA, CCL3, ENPP1, SFRP1, RASSF2	Not Improvers	Shared
GO_TUBE_DEVELOPMENT	0.00792525	0.047465	0.38073	-0.278598	-1.31245	465	MYC, JUNB, SERPINE1, EIF4EBP1, RPS7, ADAMTS1, REG1A, EPHB1, PHB2, EPHB2, DHCR7, KDR, F3, TEK, SMAD7, SRF, TNFRSF12A, JCAD, ACTG1, SPHK1, TGFB3, PFN1, EFNB2, STARD13, CIB1, THBS1, ILK, ZFP36L1, ETS1, CAV1, ANPEP, ADGRF5, SPRY2, WWTR1, EDNRB, GATA2, FGFR1, PODXL, EPHB3, FGF2, TIE1, AIMP2, LOX, TBX2, MTHFD1L, LDLR, APLNR, ROBO4, ANGPTL2, VASP, CALCRL, HEY2, ITGA3, ITGA5, GPC3, SHC1, NRP2, ELK3, CFL1…	Not Improvers	Unique
GO_CHROMATIN_ORGANIZATION	0.00795257	0.0475248	0.38073	-0.290204	-1.33591	338	MYC, FBL, SSRP1, NPM1, PTMA, ACTB, ANP32B, PRMT1, RUVBL1, PADI1, HMGA1, KPNA7, ACTL6A, SMARCD1, PRMT5, GATA2, UHRF1, GRWD1, INO80C, GFI1, PPM1F, PWP1, BRMS1, LMNA, WBP2, DAXX, LIF, NOC2L, CDK2, NPM3, CPA4, SAFB, UIMC1, KDM6B, CDCA4, NASP, DAPK3, HAT1, POLE3, MBD2, CENPX, BUD23, SCMH1, RNF168, MCM2, BRD2, SNAI2, HNRNPC, MECOM, DNMT3B, KMT5A, DOT1L, RELA, CENPH, SUPT16H, TAF12, HMGB1, WDR5, PSME4, …	Not Improvers	Unique
GO_AMEBOIDAL_TYPE_CELL_MIGRATION	0.00804032	0.0479448	0.38073	-0.326279	-1.42407	190	FERMT1, SEMA7A, PDGFB, KDR, TEK, SRF, PRSS3, JCAD, PFN1, C1QBP, EFNB2, PPARD, STARD13, S100A2, CIB1, THBS1, CORO1C, ITGA2, ILK, ETS1, AKAP12, EDNRB, GATA2, FGFR1, PXN, FGF2, MAP4K4, PPM1F, ITGA3, GPC3, NRP2, CFL1, TGFB1, FGFBP1, CDH5, HSPB1, RIC8A, FLT4, ABL1, SEMA4B, SOX18, CLEC14A, APOH, MAP3K3, AAMP, ANGPT2, HMGB1, MMRN2, RFFL, MAP2K3, HAS2, GIPC1, PKN3, CENPV	Not Improvers	Shared
GO_CELLULAR_METABOLIC_COMPOUND_SALVAGE	0.00809369	0.0481017	0.38073	-0.624068	-1.73644	16	PNP, APRT, UCK2, UPP1, ADK, DGUOK	Not Improvers	Unique
GO_CELLULAR_RESPONSE_TO_HEAT	0.00811925	0.0481017	0.38073	-0.438357	-1.60781	53	IRAK1, THBS1, NUP88, NUP85, DNAJC7, NUP107, DAXX, ANO1, NUP160, EIF2S1, VCP, SEH1L, DNAJB1, CCAR2, MAPKAPK2, STUB1, NUP37, NUP205, YWHAE, CLPB, NUP62, HSF1, SEC13, MAPK1	Not Improvers	Unique
GO_NEGATIVE_REGULATION_OF_CELL_DEATH	0.00835416	0.0492537	0.38073	-0.27932	-1.30912	436	MYC, RPL10, SERPINE1, RACK1, BCL3, SOCS3, NLE1, RPS27A, PHB2, PM20D1, RPS3A, KDR, KRT18, TEK, PRELID1, SPHK1, FLNA, UBA52, TGFB3, NPM1, PTMA, DHCR24, IRAK1, PPARD, ATAD3A, CIB1, IGBP1, THBS1, PA2G4, IFI6, ILK, YBX3, ENO1, CAV1, CCR7, SFN, PSMC5, TYRO3, AXL, SPRY2, ARHGDIA, HMGCR, EDNRB, GATA2, FGF2, CDSN, MAP4K4, ANKLE2, IRF7, PYCR1, HEY2, TSLP, PTRH2, ITGA5, LMNA, SHC1, BFAR, CFL1, INS, RAF1, NO…	Not Improvers	Unique
