# Supplementary material for: Recovery of human type 2 diabetes beta cell function associates with transcriptomic signatures that point to novel therapeutic targets
Source: Research Square preprint supplement (doi:10.21203/rs.3.rs-871924/v1), 2021-09-03
Supplement: Supplementary file 12 [file fd3b5b9df23829deabf7dcd2.xlsx]

## Sheet: Sheet1
Table S4. Top 20 Upregulated and Downregulated genes in Non-Improver Islets, Cultured vs Basal
Upregulated
Gene	Gene.name	Gene.description	mean_Non-Improvers_Cultured	mean_Non-Improvers_Basal	logFC	P.Value	adj.P.Val
ENSG00000168955	TM4SF20	transmembrane 4 L six family member 20 [Source:HGNC Symbol;Acc:HGNC:26230]	1.752	0.016	6.01488	5.80682e-06	0.0188308
ENSG00000105855	ITGB8	integrin subunit beta 8 [Source:HGNC Symbol;Acc:HGNC:6163]	11.326	5.436	0.946838	1.19611e-05	0.0188308
ENSG00000166143	PPP1R14D	protein phosphatase 1 regulatory inhibitor subunit 14D [Source:HGNC Symbol;Acc:HGNC:14953]	4.268	0.866	2.08965	2.27793e-05	0.0188308
ENSG00000253417	LINC02159	long intergenic non-protein coding RNA 2159 [Source:HGNC Symbol;Acc:HGNC:27749]	5.37	1.128	2.02016	2.5721e-05	0.0188308
ENSG00000111912	NCOA7	nuclear receptor coactivator 7 [Source:HGNC Symbol;Acc:HGNC:21081]	88.892	45.742	0.856936	5.66994e-05	0.0188308
ENSG00000286042	LCAL1	lung cancer associated lncRNA 1	24.79	3.702	2.59137	6.02894e-05	0.0188308
ENSG00000141574	SECTM1	secreted and transmembrane 1 [Source:HGNC Symbol;Acc:HGNC:10707]	13.85	4.928	1.11572	6.2588e-05	0.0188308
ENSG00000188257	PLA2G2A	phospholipase A2 group IIA [Source:HGNC Symbol;Acc:HGNC:9031]	5.558	1.552	1.60923	6.97613e-05	0.0188308
ENSG00000134198	TSPAN2	tetraspanin 2 [Source:HGNC Symbol;Acc:HGNC:20659]	15.936	9.144	0.838339	7.92816e-05	0.0188308
ENSG00000166348	USP54	ubiquitin specific peptidase 54 [Source:HGNC Symbol;Acc:HGNC:23513]	25.194	13.642	0.621492	8.77884e-05	0.0188308
ENSG00000064687	ABCA7	ATP binding cassette subfamily A member 7 [Source:HGNC Symbol;Acc:HGNC:37]	11.188	5.356	1.04215	9.25788e-05	0.0188308
ENSG00000163393	SLC22A15	solute carrier family 22 member 15 [Source:HGNC Symbol;Acc:HGNC:20301]	3.664	1.624	0.959964	9.47607e-05	0.0188331
ENSG00000171551	ECEL1	endothelin converting enzyme like 1 [Source:HGNC Symbol;Acc:HGNC:3147]	4.638	0.888	2.12056	0.000100124	0.0188331
ENSG00000115828	QPCT	glutaminyl-peptide cyclotransferase [Source:HGNC Symbol;Acc:HGNC:9753]	147.564	76.468	0.984071	0.000106519	0.0188331
ENSG00000137103	TMEM8B	transmembrane protein 8B [Source:HGNC Symbol;Acc:HGNC:21427]	6.234	3.494	0.726919	0.000118464	0.0188331
ENSG00000164951	PDP1	pyruvate dehyrogenase phosphatase catalytic subunit 1 [Source:HGNC Symbol;Acc:HGNC:9279]	35.308	17.848	0.80106	0.00012037	0.0188331
ENSG00000241635	UGT1A1	UDP glucuronosyltransferase family 1 member A1 [Source:HGNC Symbol;Acc:HGNC:12530]	12.912	1.208	3.18987	0.000123488	0.0188331
ENSG00000170540	ARL6IP1	ADP ribosylation factor like GTPase 6 interacting protein 1 [Source:HGNC Symbol;Acc:HGNC:697]	149.706	87.954	0.729041	0.000126515	0.0188331
ENSG00000166959	MS4A8	membrane spanning 4-domains A8 [Source:HGNC Symbol;Acc:HGNC:13380]	6.228	1.534	1.81075	0.000127137	0.0188331
ENSG00000172667	ZMAT3	zinc finger matrin-type 3 [Source:HGNC Symbol;Acc:HGNC:29983]	9.908	5.172	0.763725	0.000129489	0.0188331
Downregulated
Gene	Gene.name	Gene.description	mean_Non-Improvers_Cultured	mean_Non-Improvers_Basal	logFC	P.Value	adj.P.Val
ENSG00000139278	GLIPR1	GLI pathogenesis related 1 [Source:HGNC Symbol;Acc:HGNC:17001]	12.952	41.94	-1.62671	6.26708e-06	0.0188308
ENSG00000125144	MT1G	metallothionein 1G [Source:HGNC Symbol;Acc:HGNC:7399]	135.586	534.64	-2.10305	9.42069e-06	0.0188308
ENSG00000167747	C19orf48	chromosome 19 open reading frame 48 [Source:HGNC Symbol;Acc:HGNC:29667]	10.568	30.856	-1.70648	1.03299e-05	0.0188308
ENSG00000148671	ADIRF	adipogenesis regulatory factor [Source:HGNC Symbol;Acc:HGNC:24043]	4.092	15.364	-2.37443	1.17487e-05	0.0188308
ENSG00000197905	TEAD4	TEA domain transcription factor 4 [Source:HGNC Symbol;Acc:HGNC:11717]	7.734	20.964	-1.5978	1.4238e-05	0.0188308
ENSG00000114942	EEF1B2	eukaryotic translation elongation factor 1 beta 2 [Source:HGNC Symbol;Acc:HGNC:3208]	436.852	895.73	-1.20124	1.76645e-05	0.0188308
ENSG00000198918	RPL39	ribosomal protein L39 [Source:HGNC Symbol;Acc:HGNC:10350]	1941.19	3029.38	-0.828422	1.89589e-05	0.0188308
ENSG00000101311	FERMT1	fermitin family member 1 [Source:HGNC Symbol;Acc:HGNC:15889]	5.696	9.456	-0.89584	2.04708e-05	0.0188308
ENSG00000120437	ACAT2	acetyl-CoA acetyltransferase 2 [Source:HGNC Symbol;Acc:HGNC:94]	20.726	50.686	-1.44403	2.2718e-05	0.0188308
ENSG00000176014	TUBB6	tubulin beta 6 class V [Source:HGNC Symbol;Acc:HGNC:20776]	30.27	71.922	-1.48408	2.29038e-05	0.0188308
ENSG00000136942	RPL35	ribosomal protein L35 [Source:HGNC Symbol;Acc:HGNC:10344]	749.084	1466.98	-1.14189	2.38658e-05	0.0188308
ENSG00000147065	MSN	moesin [Source:HGNC Symbol;Acc:HGNC:7373]	132.178	253.384	-1.15472	2.48889e-05	0.0188308
ENSG00000112559	MDFI	MyoD family inhibitor [Source:HGNC Symbol;Acc:HGNC:6967]	4.978	9.506	-1.21171	2.5094e-05	0.0188308
ENSG00000079739	PGM1	phosphoglucomutase 1 [Source:HGNC Symbol;Acc:HGNC:8905]	56.504	93.092	-0.893919	2.58397e-05	0.0188308
ENSG00000197903	HIST1H2BK	histone cluster 1 H2B family member k [Source:HGNC Symbol;Acc:HGNC:13954]	11.998	28.462	-1.41271	3.01221e-05	0.0188308
ENSG00000106483	SFRP4	secreted frizzled related protein 4 [Source:HGNC Symbol;Acc:HGNC:10778]	0.442	2.452	-2.5999	3.3071e-05	0.0188308
ENSG00000136997	MYC	MYC proto-oncogene, bHLH transcription factor [Source:HGNC Symbol;Acc:HGNC:7553]	16.258	38.006	-1.3443	3.34492e-05	0.0188308
ENSG00000140988	RPS2	ribosomal protein S2 [Source:HGNC Symbol;Acc:HGNC:10404]	704.322	1612.97	-1.40359	3.37313e-05	0.0188308
ENSG00000196923	PDLIM7	PDZ and LIM domain 7 [Source:HGNC Symbol;Acc:HGNC:22958]	34.002	64.71	-1.16441	3.4164e-05	0.0188308
ENSG00000170889	RPS9	ribosomal protein S9 [Source:HGNC Symbol;Acc:HGNC:10442]	960.668	1645.8	-0.985936	3.60788e-05	0.0188308
